# Supplementary material for: Comparative transcriptome analysis of Lupinus polyphyllus Lindl. provides a rich molecular resource for research on coloration mechanism
Source: PeerJ. 2022 Aug 2;10:e13836. doi: 10.7717/peerj.13836 (PMC9354738; doi:10.7717/peerj.13836)
Supplement: Supplemental Information 3 — The information of 89,124 assembled unigenes and 54,823 annotated unigenes. [file peerj-10-13836-s003.xlsx]

## Sheet: unigene_anno_detail
Supplementary Table 2 Statistical analysis of unigenes. The information of 89,124 assembled unigenes and 54,823 annotated unigenes.
Gene ID	Go_description	Pathway_definition	COG_Functional_Categories	[Pyruvate dehydrogenase	Pfam_id	Domain_description
TRINITY_DN0_c0_g1	MF:cysteine-type peptidase activity		O:Posttranslational modification, protein turnover, chaperones	PREDICTED: probable ubiquitin-like-specific protease 2B isoform X2 [Lupinus angustifolius]	PF02902	Ulp1 protease family, C-terminal catalytic domain
TRINITY_DN1_c0_g1	MF:coenzyme binding;CC:integral component of membrane;CC:trans-Golgi network;BP:galacturonate biosynthetic process;BP:defense response to fungus;MF:catalytic activity;BP:defense response to Gram-negative bacterium;CC:endosome	Amino sugar and nucleotide sugar metabolism	M:Cell wall/membrane/envelope biogenesis;M:Cell wall/membrane/envelope biogenesis	PREDICTED: UDP-glucuronate 4-epimerase 6 [Lupinus angustifolius] >OIV97464.1 hypothetical protein TanjilG_10988 [Lupinus angustifolius]	PF16363;PF01370;PF01073;PF04321;PF02719;PF07993	GDP-mannose 4,6 dehydratase;NAD dependent epimerase/dehydratase family;3-beta hydroxysteroid dehydrogenase/isomerase family;RmlD substrate binding domain;Polysaccharide biosynthesis protein;Male sterility protein
TRINITY_DN1_c2_g1	MF:catalytic activity;CC:integral component of membrane;MF:coenzyme binding	Amino sugar and nucleotide sugar metabolism	M:Cell wall/membrane/envelope biogenesis;M:Cell wall/membrane/envelope biogenesis	PREDICTED: UDP-glucuronate 4-epimerase 6 [Lupinus angustifolius] >OIV97464.1 hypothetical protein TanjilG_10988 [Lupinus angustifolius]	PF16363;PF01370;PF01073;PF04321;PF02719;PF07993	GDP-mannose 4,6 dehydratase;NAD dependent epimerase/dehydratase family;3-beta hydroxysteroid dehydrogenase/isomerase family;RmlD substrate binding domain;Polysaccharide biosynthesis protein;Male sterility protein
TRINITY_DN10_c0_g1	MF:structural constituent of ribosome;BP:translation;CC:ribosome		O:Posttranslational modification, protein turnover, chaperones	PREDICTED: large proline-rich protein bag6-like isoform X2 [Lupinus angustifolius]
TRINITY_DN100_c0_g1	BP:lipid homeostasis;MF:phospholipase A2 activity;MF:transferase activity, transferring acyl groups;MF:lysophosphatidic acid acyltransferase activity;MF:carboxylic ester hydrolase activity		S:Function unknown	PREDICTED: 1-acylglycerol-3-phosphate O-acyltransferase [Lupinus angustifolius] >OIV96318.1 hypothetical protein TanjilG_09745 [Lupinus angustifolius]	PF00561;PF12146;PF03096;PF12697;PF06259;PF00756;PF12695	alpha/beta hydrolase fold;Serine aminopeptidase, S33;Ndr family;Alpha/beta hydrolase family;Alpha/beta hydrolase;Putative esterase;Alpha/beta hydrolase family
TRINITY_DN100_c0_g2	MF:hydrolase activity;MF:carboxylic ester hydrolase activity;BP:lipid homeostasis;MF:catalytic activity;MF:transferase activity, transferring acyl groups;MF:lysophosphatidic acid acyltransferase activity;MF:phospholipase A2 activity		S:Function unknown	PREDICTED: 1-acylglycerol-3-phosphate O-acyltransferase [Lupinus angustifolius] >OIV96318.1 hypothetical protein TanjilG_09745 [Lupinus angustifolius]
TRINITY_DN100_c1_g1	MF:hydrolase activity;MF:carboxylic ester hydrolase activity;BP:lipid homeostasis;MF:catalytic activity;MF:transferase activity, transferring acyl groups;MF:lysophosphatidic acid acyltransferase activity;MF:phospholipase A2 activity		S:Function unknown	PREDICTED: probable 1-acylglycerol-3-phosphate O-acyltransferase isoform X1 [Lupinus angustifolius] >XP_019436865.1 PREDICTED: probable 1-acylglycerol-3-phosphate O-acyltransferase isoform X1 [Lupinus angustifolius] >XP_019436866.1 PREDICTED: probable 1-acylglycerol-3-phosphate O-acyltransferase isoform X1 [Lupinus angustifolius]	PF00561;PF12146;PF12697;PF12740;PF03096	alpha/beta hydrolase fold;Serine aminopeptidase, S33;Alpha/beta hydrolase family;Chlorophyllase enzyme;Ndr family
TRINITY_DN1000_c0_g1	MF:protein phosphatase regulator activity;BP:protein dephosphorylation;CC:protein phosphatase type 2A complex;CC:cytoplasm	mRNA surveillance pathway	T:Signal transduction mechanisms	PREDICTED: protein phosphatase PP2A regulatory subunit A-like [Lupinus angustifolius] >OIW08896.1 hypothetical protein TanjilG_05871 [Lupinus angustifolius]	PF02985;PF13646;PF13513;PF12755	HEAT repeat;HEAT repeats;HEAT-like repeat;Vacuolar 14 Fab1-binding region
TRINITY_DN10000_c1_g1	MF:ADP binding	Plant-pathogen interaction	S:Function unknown	hypothetical protein TanjilG_31906 [Lupinus angustifolius]	PF12799;PF13855	Leucine Rich repeats ;Leucine rich repeat
TRINITY_DN10000_c1_g2	MF:ADP binding	Plant-pathogen interaction	S:Function unknown	hypothetical protein TanjilG_31906 [Lupinus angustifolius]
TRINITY_DN10000_c1_g3	MF:ADP binding	Plant-pathogen interaction	S:Function unknown	hypothetical protein TanjilG_31906 [Lupinus angustifolius]	PF12799	Leucine Rich repeats
TRINITY_DN10001_c0_g1	BP:proteolysis;MF:aspartic-type endopeptidase activity;BP:protein catabolic process		O:Posttranslational modification, protein turnover, chaperones	PREDICTED: aspartyl protease family protein At5g10770-like, partial [Lupinus angustifolius]	PF14543	Xylanase inhibitor N-terminal
TRINITY_DN100014_c0_g1			S:Function unknown	PREDICTED: non-specific lipid-transfer protein-like protein At2g13820 [Lupinus angustifolius]	PF14368	Probable lipid transfer
TRINITY_DN100016_c0_g1				PREDICTED: uncharacterized protein LOC109325874 [Lupinus angustifolius] >OIV98728.1 hypothetical protein TanjilG_24899 [Lupinus angustifolius]
TRINITY_DN10002_c0_g1	BP:intracellular protein transport;MF:Ran GTPase binding;CC:nucleus		O:Posttranslational modification, protein turnover, chaperones	PREDICTED: exportin-2-like [Lupinus angustifolius] >OIW04590.1 hypothetical protein TanjilG_18067 [Lupinus angustifolius]	PF08506	Cse1
TRINITY_DN100029_c0_g1	BP:fucose metabolic process;MF:transferase activity, transferring glycosyl groups			Os05g0132500 [Oryza sativa Japonica Group] >BAS92127.1 Os05g0132500 [Oryza sativa Japonica Group]
TRINITY_DN10003_c0_g1	CC:catalytic step 2 spliceosome;BP:mRNA splicing, via spliceosome	Spliceosome	A:RNA processing and modification	PREDICTED: pre-mRNA-processing factor 17-like [Lupinus angustifolius] >OIV90629.1 hypothetical protein TanjilG_01710 [Lupinus angustifolius]	PF00400;PF12894	WD domain, G-beta repeat;Anaphase-promoting complex subunit 4 WD40 domain
TRINITY_DN10003_c0_g2	CC:catalytic step 2 spliceosome;BP:mRNA splicing, via spliceosome	Spliceosome	A:RNA processing and modification	PREDICTED: pre-mRNA-processing factor 17-like [Lupinus angustifolius] >OIV90629.1 hypothetical protein TanjilG_01710 [Lupinus angustifolius]	PF00400;PF12894	WD domain, G-beta repeat;Anaphase-promoting complex subunit 4 WD40 domain
TRINITY_DN10004_c0_g1	CC:ribonuclease H2 complex;BP:DNA replication, removal of RNA primer;MF:RNA binding;MF:RNA-DNA hybrid ribonuclease activity;BP:mismatch repair	DNA replication	L:Replication, recombination and repair	PREDICTED: ribonuclease H2 subunit A-like [Lupinus angustifolius]	PF01351	Ribonuclease HII
TRINITY_DN10004_c0_g2	CC:ribonuclease H2 complex;BP:DNA replication, removal of RNA primer;MF:RNA binding;MF:RNA-DNA hybrid ribonuclease activity;BP:mismatch repair	DNA replication	L:Replication, recombination and repair	PREDICTED: ribonuclease H2 subunit A-like [Lupinus angustifolius]	PF01351	Ribonuclease HII
TRINITY_DN10005_c0_g1	BP:inositol phosphate biosynthetic process;CC:nucleus;BP:inositol phosphorylation;MF:inositol pentakisphosphate 2-kinase activity;MF:ATP binding	Phosphatidylinositol signaling system;Inositol phosphate metabolism	S:Function unknown	PREDICTED: inositol-pentakisphosphate 2-kinase-like [Lupinus angustifolius] >XP_019436900.1 PREDICTED: inositol-pentakisphosphate 2-kinase-like [Lupinus angustifolius] >XP_019436901.1 PREDICTED: inositol-pentakisphosphate 2-kinase-like [Lupinus angustifolius] >OIW15615.1 hypothetical protein TanjilG_08191 [Lupinus angustifolius]	PF06090	Inositol-pentakisphosphate 2-kinase
TRINITY_DN10005_c0_g2				hypothetical protein TanjilG_09174 [Lupinus angustifolius]
TRINITY_DN100050_c0_g2	MF:structural constituent of ribosome;CC:small ribosomal subunit;MF:RNA binding;BP:translation	Ribosome	S:Function unknown	predicted protein [Hordeum vulgare subsp. vulgare]	PF00189;PF07650	Ribosomal protein S3, C-terminal domain;KH domain
TRINITY_DN10006_c0_g1	BP:DNA integration;MF:nucleic acid binding			uncharacterized protein K02A2.6-like [Vigna unguiculata]
TRINITY_DN10008_c0_g1	CC:integral component of membrane		S:Function unknown	hypothetical protein KK1_031997, partial [Cajanus cajan]
TRINITY_DN100082_c0_g1	BP:protein phosphorylation;CC:integral component of membrane;CC:plasma membrane;MF:protein serine/threonine kinase activity;BP:defense response to bacterium;MF:protein kinase activity;MF:ATP binding		T:Signal transduction mechanisms;S:Function unknown	hypothetical protein TanjilG_24771 [Lupinus angustifolius]	PF01657	Salt stress response/antifungal
TRINITY_DN10009_c0_g1			S:Function unknown	hypothetical protein TanjilG_23996 [Lupinus angustifolius]	PF09072	Translation machinery associated TMA7
TRINITY_DN100094_c0_g1	CC:integral component of membrane			PREDICTED: protein NUCLEAR FUSION DEFECTIVE 4-like [Lupinus angustifolius] >XP_019413738.1 PREDICTED: protein NUCLEAR FUSION DEFECTIVE 4-like [Lupinus angustifolius] >OIV99555.1 hypothetical protein TanjilG_17365 [Lupinus angustifolius]
TRINITY_DN100094_c1_g1	CC:integral component of membrane		S:Function unknown	PREDICTED: protein NUCLEAR FUSION DEFECTIVE 4-like [Lupinus angustifolius] >XP_019413738.1 PREDICTED: protein NUCLEAR FUSION DEFECTIVE 4-like [Lupinus angustifolius] >OIV99555.1 hypothetical protein TanjilG_17365 [Lupinus angustifolius]
TRINITY_DN100094_c1_g2	CC:integral component of membrane		S:Function unknown	PREDICTED: protein NUCLEAR FUSION DEFECTIVE 4-like [Lupinus angustifolius] >OIW08855.1 hypothetical protein TanjilG_16436 [Lupinus angustifolius]	PF07690	Major Facilitator Superfamily
TRINITY_DN1001_c0_g1	CC:integral component of membrane;MF:metal ion binding		S:Function unknown	PREDICTED: LIM domain-containing protein WLIM1-like [Lupinus angustifolius] >XP_019436962.1 PREDICTED: LIM domain-containing protein WLIM1-like [Lupinus angustifolius] >OIW15571.1 hypothetical protein TanjilG_01094 [Lupinus angustifolius]	PF00412	LIM domain
TRINITY_DN10010_c0_g1			S:Function unknown	PREDICTED: uncharacterized protein LOC109345534 isoform X1 [Lupinus angustifolius]
TRINITY_DN10010_c0_g3			S:Function unknown	PREDICTED: uncharacterized protein LOC109345534 isoform X1 [Lupinus angustifolius]
TRINITY_DN100109_c0_g1	BP:poly;MF:structural constituent of nuclear pore;CC:nuclear pore;CC:membrane;BP:protein import into nucleus;MF:transferase activity;BP:protein transport;BP:mRNA transport	RNA transport	U:Intracellular trafficking, secretion, and vesicular transport	hypothetical protein TanjilG_30127 [Lupinus angustifolius]	PF04097	Nup93/Nic96
TRINITY_DN10011_c0_g1	BP:regulation of transcription, DNA-templated;CC:nucleus;MF:DNA binding		S:Function unknown	PREDICTED: NAC domain-containing protein 104-like [Lupinus angustifolius] >XP_019440374.1 PREDICTED: NAC domain-containing protein 104-like [Lupinus angustifolius] >OIW13623.1 hypothetical protein TanjilG_07965 [Lupinus angustifolius]	PF02365	No apical meristem
TRINITY_DN10011_c0_g2	BP:regulation of transcription, DNA-templated;CC:nucleus;MF:DNA binding		S:Function unknown	PREDICTED: NAC domain-containing protein 104-like isoform X2 [Lupinus angustifolius]	PF02365	No apical meristem
TRINITY_DN100111_c0_g1	MF:glycine hydroxymethyltransferase activity;CC:integral component of membrane;BP:tetrahydrofolate interconversion;BP:glycine biosynthetic process from serine;MF:pyridoxal phosphate binding;MF:methyltransferase activity	Cyanoamino acid metabolism;Glyoxylate and dicarboxylate metabolism;One carbon pool by folate;Glycine, serine and threonine metabolism		hypothetical protein, partial [Lupinus angustifolius]
TRINITY_DN100116_c0_g1	CC:integral component of membrane;MF:peptidase activity		S:Function unknown	uncharacterized protein LOC110107953, partial [Dendrobium catenatum]	PF02517	CPBP intramembrane metalloprotease
TRINITY_DN100116_c0_g3	CC:retrotransposon nucleocapsid;CC:integral component of membrane;BP:DNA integration;MF:zinc ion binding;MF:nucleic acid binding;MF:RNA-directed DNA polymerase activity			hypothetical protein CR513_06376, partial [Mucuna pruriens]
TRINITY_DN10012_c0_g1	CC:pre-autophagosomal structure;CC:cytosol;CC:membrane;BP:autophagosome assembly;MF:protein serine/threonine kinase activity;MF:protein kinase activity;BP:regulation of autophagy;BP:protein autophosphorylation;MF:ATP binding		T:Signal transduction mechanisms	PREDICTED: serine/threonine-protein kinase ATG1c-like isoform X1 [Lupinus angustifolius]	PF00069;PF07714	Protein kinase domain;Protein tyrosine kinase
TRINITY_DN100123_c0_g1	CC:integral component of membrane;CC:membrane;BP:protein localization to membrane			Transmembrane 9 superfamily member 1 [Vitis vinifera]	PF02990	Endomembrane protein 70
TRINITY_DN100123_c0_g2	CC:integral component of membrane		T:Signal transduction mechanisms	hypothetical protein TanjilG_24295 [Lupinus angustifolius]	PF02990	Endomembrane protein 70
TRINITY_DN100125_c0_g1	MF:protein phosphatase regulator activity;BP:signal transduction;CC:protein phosphatase type 2A complex	mRNA surveillance pathway	T:Signal transduction mechanisms	PREDICTED: serine/threonine protein phosphatase 2A 57 kDa regulatory subunit B' theta isoform-like [Lupinus angustifolius] >XP_019453027.1 PREDICTED: serine/threonine protein phosphatase 2A 57 kDa regulatory subunit B' theta isoform-like [Lupinus angustifolius] >XP_019453028.1 PREDICTED: serine/threonine protein phosphatase 2A 57 kDa regulatory subunit B' theta isoform-like [Lupinus angustifolius…	PF01603	Protein phosphatase 2A regulatory B subunit
TRINITY_DN100125_c1_g1	CC:protein phosphatase type 2A complex;MF:protein phosphatase regulator activity;BP:protein dephosphorylation;CC:cytosol;BP:regulation of protein autophosphorylation;MF:protein phosphatase activator activity;BP:signal transduction;CC:nucleus	mRNA surveillance pathway	T:Signal transduction mechanisms	PREDICTED: serine/threonine protein phosphatase 2A 57 kDa regulatory subunit B' theta isoform-like [Lupinus angustifolius] >XP_019453027.1 PREDICTED: serine/threonine protein phosphatase 2A 57 kDa regulatory subunit B' theta isoform-like [Lupinus angustifolius] >XP_019453028.1 PREDICTED: serine/threonine protein phosphatase 2A 57 kDa regulatory subunit B' theta isoform-like [Lupinus angustifolius…	PF01603	Protein phosphatase 2A regulatory B subunit
TRINITY_DN10013_c0_g1	CC:integral component of membrane		S:Function unknown	PREDICTED: transmembrane protein 147-like [Lupinus angustifolius]	PF09767	Predicted membrane protein
TRINITY_DN100134_c0_g2	CC:integral component of membrane		S:Function unknown	hypothetical protein TanjilG_11440 [Lupinus angustifolius]	PF17963;PF17892;PF17803	Bacterial Ig domain;Cadherin-like domain;Bacterial cadherin-like domain
TRINITY_DN100134_c0_g3	CC:integral component of membrane		S:Function unknown	PREDICTED: protein GAMETE EXPRESSED 2 [Lupinus angustifolius]
TRINITY_DN10014_c0_g1			S:Function unknown	PREDICTED: short-chain dehydrogenase TIC 32, chloroplastic-like [Lupinus angustifolius] >OIW05084.1 hypothetical protein TanjilG_06220 [Lupinus angustifolius]	PF00106;PF13561;PF08659	short chain dehydrogenase;Enoyl-;KR domain
TRINITY_DN100142_c0_g1				hypothetical protein TanjilG_09174 [Lupinus angustifolius]
TRINITY_DN10015_c0_g1	MF:hydrolase activity;CC:integral component of membrane		O:Posttranslational modification, protein turnover, chaperones	PREDICTED: E3 ubiquitin-protein ligase At1g12760-like isoform X1 [Lupinus angustifolius] >XP_019456042.1 PREDICTED: E3 ubiquitin-protein ligase At1g12760-like isoform X1 [Lupinus angustifolius] >XP_019456043.1 PREDICTED: E3 ubiquitin-protein ligase At1g12760-like isoform X1 [Lupinus angustifolius] >XP_019456044.1 PREDICTED: E3 ubiquitin-protein ligase At1g12760-like isoform X1 [Lupinus angustifol…
TRINITY_DN100150_c0_g1	MF:hydrolase activity;MF:ADP binding	Plant-pathogen interaction	S:Function unknown	hypothetical protein TanjilG_32287 [Lupinus angustifolius]
TRINITY_DN100151_c0_g1	BP:cell wall modification;BP:pectin catabolic process;MF:pectinesterase activity;MF:aspartyl esterase activity		S:Function unknown	PREDICTED: probable pectinesterase 68 [Lupinus angustifolius]	PF01095	Pectinesterase
TRINITY_DN100155_c0_g1	MF:protein serine/threonine kinase activity;MF:ATP binding	MAPK signaling pathway - plant		hypothetical protein PHAVU_003G139700g [Phaseolus vulgaris] >ESW26685.1 hypothetical protein PHAVU_003G139700g [Phaseolus vulgaris]
TRINITY_DN100156_c0_g1	MF:ATP binding;MF:protein kinase activity		S:Function unknown	PREDICTED: uncharacterized aarF domain-containing protein kinase At1g79600, chloroplastic-like [Lupinus angustifolius] >OIW00960.1 hypothetical protein TanjilG_10038 [Lupinus angustifolius]	PF03109	ABC1 family
TRINITY_DN100156_c0_g2	MF:cadmium-transporting ATPase activity;MF:hydrolase activity;MF:ATP binding;MF:protein kinase activity		S:Function unknown	hypothetical protein TSUD_173390 [Trifolium subterraneum]
TRINITY_DN100158_c0_g1	CC:integral component of membrane;BP:lipid metabolic process;MF:phosphoric diester hydrolase activity		S:Function unknown	PI-PLC X domain-containing protein At5g67130 isoform X1 [Vigna radiata var. radiata]
TRINITY_DN100168_c0_g1	BP:carbohydrate metabolic process;MF:beta-galactosidase activity;MF:hydrolase activity, hydrolyzing O-glycosyl compounds		G:Carbohydrate transport and metabolism	PREDICTED: beta-galactosidase 5-like [Lupinus angustifolius] >XP_019436874.1 PREDICTED: beta-galactosidase 5-like [Lupinus angustifolius] >OIW15599.1 hypothetical protein TanjilG_08175 [Lupinus angustifolius]
TRINITY_DN100168_c1_g1	CC:cell wall;BP:carbohydrate metabolic process;MF:beta-galactosidase activity;CC:vacuole		G:Carbohydrate transport and metabolism	hypothetical protein TanjilG_17056 [Lupinus angustifolius]
TRINITY_DN100169_c0_g1	MF:protein serine/threonine kinase activity;BP:signal transduction;MF:ATP binding		T:Signal transduction mechanisms	PREDICTED: CBL-interacting serine/threonine-protein kinase 12-like [Lupinus angustifolius] >OIV95241.1 hypothetical protein TanjilG_21631 [Lupinus angustifolius]
TRINITY_DN10017_c0_g1	CC:retrotransposon nucleocapsid;BP:DNA integration;MF:RNA-directed DNA polymerase activity;MF:nucleic acid binding		L:Replication, recombination and repair	PREDICTED: uncharacterized protein LOC109348071 [Lupinus angustifolius]	PF14223	gag-polypeptide of LTR copia-type
TRINITY_DN10017_c0_g2			L:Replication, recombination and repair	PREDICTED: uncharacterized protein LOC109348071 [Lupinus angustifolius]	PF14223;PF03732	gag-polypeptide of LTR copia-type;Retrotransposon gag protein
TRINITY_DN100172_c0_g1	MF:6-phosphofructokinase activity;CC:cytoplasm;MF:metal ion binding;BP:fructose 6-phosphate metabolic process;MF:ATP binding	RNA degradation;Glycolysis / Gluconeogenesis;Pentose phosphate pathway;Fructose and mannose metabolism;Galactose metabolism	S:Function unknown	PREDICTED: ATP-dependent 6-phosphofructokinase 3-like [Lupinus angustifolius] >OIW15741.1 hypothetical protein TanjilG_04276 [Lupinus angustifolius]
TRINITY_DN10018_c0_g1	BP:triglyceride biosynthetic process;CC:cytosol;MF:diacylglycerol O-acyltransferase activity;MF:transferase activity, transferring acyl groups		S:Function unknown;S:Function unknown	PREDICTED: uncharacterized protein LOC109329723 [Lupinus angustifolius] >OIV95296.1 hypothetical protein TanjilG_07452 [Lupinus angustifolius]	PF01257;PF05793	Thioredoxin-like [2Fe-2S] ferredoxin;Transcription initiation factor IIF, alpha subunit
TRINITY_DN100181_c0_g1	CC:nucleus;MF:metal ion binding;BP:brassinosteroid mediated signaling pathway;MF:protein serine/threonine phosphatase activity;MF:phosphoprotein phosphatase activity		G:Carbohydrate transport and metabolism	serine/threonine-protein phosphatase BSL3 [Papaver somniferum] >RZC84176.1 hypothetical protein C5167_046962 [Papaver somniferum]
TRINITY_DN100187_c0_g1	MF:zinc ion binding;MF:nucleic acid binding			hypothetical protein Ahy_B04g070060 isoform F [Arachis hypogaea]	PF00098	Zinc knuckle
TRINITY_DN10019_c0_g1	MF:metal ion transmembrane transporter activity;CC:membrane;BP:zinc II ion transmembrane transport;CC:integral component of membrane;MF:zinc ion transmembrane transporter activity		P:Inorganic ion transport and metabolism	PREDICTED: zinc transporter ZTP29 [Lupinus angustifolius]	PF02535	ZIP Zinc transporter
TRINITY_DN100194_c0_g1				PREDICTED: disease resistance protein At4g27190-like [Lupinus angustifolius] >XP_019449301.1 PREDICTED: disease resistance protein At4g27190-like [Lupinus angustifolius]
TRINITY_DN1002_c0_g1	MF:phosphoric ester hydrolase activity;CC:integral component of membrane		T:Signal transduction mechanisms	PREDICTED: phosphoinositide phosphatase SAC8-like isoform X1 [Lupinus angustifolius] >XP_019450316.1 PREDICTED: phosphoinositide phosphatase SAC8-like isoform X1 [Lupinus angustifolius] >XP_019450317.1 PREDICTED: phosphoinositide phosphatase SAC8-like isoform X1 [Lupinus angustifolius] >XP_019450318.1 PREDICTED: phosphoinositide phosphatase SAC8-like isoform X1 [Lupinus angustifolius]	PF02383	SacI homology domain
TRINITY_DN1002_c5_g1	MF:phosphoric ester hydrolase activity;CC:integral component of membrane		T:Signal transduction mechanisms	hypothetical protein TanjilG_23047 [Lupinus angustifolius]	PF02383	SacI homology domain
TRINITY_DN10021_c0_g1	BP:response to auxin;BP:response to abscisic acid;BP:response to jasmonic acid;MF:transcription factor activity, sequence-specific DNA binding;CC:nucleus;BP:response to salt stress;BP:response to ethylene;MF:zinc ion binding;BP:response to karrikin;MF:DNA binding;BP:response to cadmium ion;BP:response to salicylic acid;MF:chromatin binding;BP:response to gibberellin;BP:regulation of anthocyanin b…		K:Transcription	PREDICTED: transcription factor MYB1R1-like [Lupinus angustifolius] >OIW10522.1 hypothetical protein TanjilG_15894 [Lupinus angustifolius]	PF00249	Myb-like DNA-binding domain
TRINITY_DN100211_c0_g1			S:Function unknown	translationally-controlled tumor protein homolog [Coffea arabica] >CDP17189.1 unnamed protein product [Coffea canephora]	PF00838	Translationally controlled tumour protein
TRINITY_DN100219_c0_g1	CC:integral component of membrane;MF:cation transmembrane transporter activity;MF:tetrahydrofolylpolyglutamate synthase activity;MF:DNA-directed DNA polymerase activity;MF:transferase activity;MF:ATP binding;MF:RNA-directed DNA polymerase activity;BP:oxidation-reduction process	Glycosylphosphatidylinositol	S:Function unknown;S:Function unknown	hypothetical protein KK1_011783, partial [Cajanus cajan]
TRINITY_DN100222_c0_g2	MF:structural constituent of ribosome;BP:translation;CC:ribosome		S:Function unknown;S:Function unknown;S:Function unknown	PREDICTED: uncharacterized protein LOC109342160 [Lupinus angustifolius] >OIW16437.1 hypothetical protein TanjilG_19153 [Lupinus angustifolius]	PF00861	Ribosomal L18 of archaea, bacteria, mitoch. and chloroplast
TRINITY_DN10023_c0_g1	CC:nucleus;BP:DNA replication		S:Function unknown	PREDICTED: DNA replication complex GINS protein PSF3-like [Lupinus angustifolius] >XP_019448694.1 PREDICTED: DNA replication complex GINS protein PSF3-like [Lupinus angustifolius] >OIW08588.1 hypothetical protein TanjilG_03264 [Lupinus angustifolius]
TRINITY_DN100233_c0_g6	CC:retrotransposon nucleocapsid;MF:transcription cofactor activity;BP:DNA integration;BP:regulation of transcription from RNA polymerase II promoter;MF:nucleic acid binding;CC:mediator complex	Endocytosis		Retrovirus-related Pol polyprotein from transposon TNT 1-94 [Cajanus cajan]	PF07727	Reverse transcriptase
TRINITY_DN100236_c0_g1				hypothetical protein TanjilG_13193 [Lupinus angustifolius]
TRINITY_DN100237_c0_g1	MF:structural constituent of ribosome;BP:translation;CC:ribosome	Ribosome	J:Translation, ribosomal structure and biogenesis	PREDICTED: 60S ribosomal protein L12-like [Lupinus angustifolius] >OIW03926.1 hypothetical protein TanjilG_30202 [Lupinus angustifolius]	PF00298	Ribosomal protein L11, RNA binding domain
TRINITY_DN100238_c0_g1	CC:integral component of membrane		S:Function unknown	PREDICTED: mitochondrial arginine transporter BAC2 [Lupinus angustifolius] >OIW18982.1 hypothetical protein TanjilG_23759 [Lupinus angustifolius]
TRINITY_DN10024_c0_g1	MF:methyltransferase activity	Lysine degradation	S:Function unknown	hypothetical protein TanjilG_24723 [Lupinus angustifolius]
TRINITY_DN100242_c0_g1	BP:anthocyanin-containing compound biosynthetic process;BP:chlorophyll biosynthetic process;CC:nucleus;BP:response to light stimulus;BP:positive regulation of transcription, DNA-templated;CC:plasma membrane		S:Function unknown	PREDICTED: uncharacterized protein LOC109348161 [Lupinus angustifolius] >XP_019443965.1 PREDICTED: uncharacterized protein LOC109348161 [Lupinus angustifolius] >OIW11524.1 hypothetical protein TanjilG_26890 [Lupinus angustifolius]
TRINITY_DN100245_c0_g1	CC:Golgi apparatus;CC:integral component of membrane;MF:O-acetyltransferase activity;BP:xyloglucan metabolic process		G:Carbohydrate transport and metabolism	PREDICTED: protein ALTERED XYLOGLUCAN 4-like [Lupinus angustifolius] >OIW10545.1 hypothetical protein TanjilG_15917 [Lupinus angustifolius]	PF13839	GDSL/SGNH-like Acyl-Esterase family found in Pmr5 and Cas1p
TRINITY_DN10025_c0_g2	MF:transcription regulatory region DNA binding;CC:nucleus;CC:Smc5-Smc6 complex;BP:cellular response to DNA damage stimulus;BP:negative regulation of defense response;BP:negative regulation of transcription, DNA-templated;BP:histone modification;BP:negative regulation of systemic acquired resistance		S:Function unknown	PREDICTED: uncharacterized protein LOC109332290 isoform X1 [Lupinus angustifolius] >XP_019422775.1 PREDICTED: uncharacterized protein LOC109332290 isoform X1 [Lupinus angustifolius]
TRINITY_DN100256_c0_g1	MF:zinc ion binding		S:Function unknown	hypothetical protein TanjilG_22477 [Lupinus angustifolius]	PF13041;PF01535;PF12854;PF13812	PPR repeat family;PPR repeat;PPR repeat;Pentatricopeptide repeat domain
TRINITY_DN100257_c0_g1
TRINITY_DN10026_c0_g1	CC:amyloplast;MF:glycogen ;CC:chloroplast;BP:starch biosynthetic process	Starch and sucrose metabolism	G:Carbohydrate transport and metabolism	PREDICTED: granule-bound starch synthase 1, chloroplastic/amyloplastic-like [Lupinus angustifolius] >XP_019422044.1 PREDICTED: granule-bound starch synthase 1, chloroplastic/amyloplastic-like [Lupinus angustifolius] >OIV93873.1 hypothetical protein TanjilG_05576 [Lupinus angustifolius]	PF08323;PF00534;PF13692	Starch synthase catalytic domain;Glycosyl transferases group 1;Glycosyl transferases group 1
TRINITY_DN100263_c0_g1	MF:sequence-specific DNA binding;CC:nucleus;MF:zinc ion binding;BP:positive regulation of transcription, DNA-templated		S:Function unknown	hypothetical protein TanjilG_12581 [Lupinus angustifolius]	PF00320	GATA zinc finger
TRINITY_DN100269_c0_g1				PREDICTED: uncharacterized protein LOC109328958 [Lupinus angustifolius] >OIV95928.1 hypothetical protein TanjilG_27032 [Lupinus angustifolius]
TRINITY_DN10027_c0_g1	MF:phosphatidylinositol phospholipase C activity;BP:intracellular signal transduction;BP:lipid catabolic process	Phosphatidylinositol signaling system;AGE-RAGE signaling pathway in diabetic complications;Inositol phosphate metabolism	S:Function unknown	PREDICTED: phosphoinositide phospholipase C 4-like [Lupinus angustifolius] >OIW04365.1 hypothetical protein TanjilG_32557 [Lupinus angustifolius]	PF00388;PF00387;PF00168;PF09279	Phosphatidylinositol-specific phospholipase C, X domain;Phosphatidylinositol-specific phospholipase C, Y domain;C2 domain;Phosphoinositide-specific phospholipase C, efhand-like
TRINITY_DN100272_c0_g1		RNA transport	S:Function unknown	hypothetical protein TanjilG_19879 [Lupinus angustifolius]
TRINITY_DN10028_c0_g1	BP:protein oligomerization;BP:protein folding;BP:response to hydrogen peroxide;MF:unfolded protein binding;BP:response to reactive oxygen species;BP:response to salt stress;BP:response to heat;MF:protein self-association	Protein processing in endoplasmic reticulum	O:Posttranslational modification, protein turnover, chaperones	PREDICTED: 18.0 kDa class I heat shock protein-like [Lupinus angustifolius] >OIW04081.1 hypothetical protein TanjilG_00641 [Lupinus angustifolius]	PF00011;PF17886;PF04969	Hsp20/alpha crystallin family;HSP20-like domain found in ArsA;CS domain
TRINITY_DN100286_c0_g1	MF:hydrolase activity;MF:ADP binding		S:Function unknown	hypothetical protein TanjilG_31906 [Lupinus angustifolius]
TRINITY_DN100286_c0_g2	MF:ADP binding	Plant-pathogen interaction	S:Function unknown	hypothetical protein TanjilG_31906 [Lupinus angustifolius]
TRINITY_DN100286_c0_g3	MF:hydrolase activity;MF:ADP binding	Plant-pathogen interaction	S:Function unknown	hypothetical protein TanjilG_31906 [Lupinus angustifolius]
TRINITY_DN100286_c0_g4	MF:hydrolase activity;MF:ADP binding		S:Function unknown	hypothetical protein TanjilG_31906 [Lupinus angustifolius]
TRINITY_DN100287_c0_g2	BP:negative regulation of flower development;BP:flower development;MF:transcription cofactor activity;BP:vegetative to reproductive phase transition of meristem		S:Function unknown	terminal flower 1b [Glycine max] >ADF30892.1 Dt1 [Glycine max] >ADF30895.1 Dt1 [Glycine max] >ADF30896.1 Dt1 [Glycine max] >ADF30899.1 Dt1 [Glycine max] >ADF30902.1 Dt1 [Glycine max] >ADF30904.1 Dt1 [Glycine max] >ADF30905.1 Dt1 [Glycine max] >ADF30909.1 Dt1 [Glycine max] >ADF30910.1 Dt1 [Glycine max] >ADF30914.1 Dt1 [Glycine max] >ADF30921.1 Dt1 [Glycine max] >ADF30929.1 Dt1 [Glycine max] >ADF30…	PF01161	Phosphatidylethanolamine-binding protein
TRINITY_DN10029_c0_g1	CC:BORC complex;BP:lysosome localization		S:Function unknown	PREDICTED: kxDL motif-containing protein 1 [Lupinus angustifolius] >OIW19284.1 hypothetical protein TanjilG_20409 [Lupinus angustifolius]	PF10241	Uncharacterized conserved protein
TRINITY_DN100293_c0_g2				hypothetical protein TanjilG_09174 [Lupinus angustifolius]
TRINITY_DN100295_c0_g1	MF:RNA-directed DNA polymerase activity;BP:DNA integration;MF:zinc ion binding;MF:nucleic acid binding			PREDICTED: uncharacterized protein LOC105965854 [Erythranthe guttata]
TRINITY_DN100295_c0_g3	CC:retrotransposon nucleocapsid;BP:DNA integration;MF:zinc ion binding;MF:nucleic acid binding	Arginine and proline metabolism	L:Replication, recombination and repair	hypothetical protein	PF13976	GAG-pre-integrase domain
TRINITY_DN1003_c0_g1	CC:Golgi apparatus;MF:transferase activity;CC:integral component of membrane;MF:transferase activity, transferring glycosyl groups		M:Cell wall/membrane/envelope biogenesis	PREDICTED: probable xyloglucan glycosyltransferase 12 [Lupinus angustifolius] >OIW14923.1 hypothetical protein TanjilG_30642 [Lupinus angustifolius]	PF00535;PF13641	Glycosyl transferase family 2;Glycosyltransferase like family 2
TRINITY_DN1003_c0_g2	CC:Golgi apparatus;MF:transferase activity;CC:integral component of membrane;MF:transferase activity, transferring glycosyl groups		M:Cell wall/membrane/envelope biogenesis	PREDICTED: probable xyloglucan glycosyltransferase 12 [Lupinus angustifolius] >OIV96397.1 hypothetical protein TanjilG_09824 [Lupinus angustifolius]	PF13632;PF13641;PF00535;PF13506;PF03142	Glycosyl transferase family group 2;Glycosyltransferase like family 2;Glycosyl transferase family 2;Glycosyl transferase family 21;Chitin synthase
TRINITY_DN1003_c0_g3	CC:integral component of membrane;MF:transferase activity		M:Cell wall/membrane/envelope biogenesis	PREDICTED: probable xyloglucan glycosyltransferase 12 [Lupinus angustifolius] >XP_019436979.1 PREDICTED: probable xyloglucan glycosyltransferase 12 [Lupinus angustifolius] >OIW15557.1 hypothetical protein TanjilG_01080 [Lupinus angustifolius]
TRINITY_DN1003_c5_g1	CC:Golgi apparatus;MF:transferase activity, transferring glycosyl groups;CC:integral component of membrane;MF:RNA-DNA hybrid ribonuclease activity;MF:transferase activity;MF:nucleic acid binding		M:Cell wall/membrane/envelope biogenesis	probable xyloglucan glycosyltransferase 12 [Medicago truncatula] >KEH35854.1 xyloglucan glycosyltransferase [Medicago truncatula] >RHN70405.1 putative glycosyltransferase [Medicago truncatula]	PF13632;PF13641;PF13506	Glycosyl transferase family group 2;Glycosyltransferase like family 2;Glycosyl transferase family 21
TRINITY_DN10030_c0_g1	BP:root hair elongation;CC:cytosol;BP:embryo development ending in seed dormancy;BP:ubiquitin-dependent protein catabolic process;MF:zinc ion binding;CC:nucleus;BP:protein deubiquitination;MF:thiol-dependent ubiquitin-specific protease activity		O:Posttranslational modification, protein turnover, chaperones	PREDICTED: ubiquitin carboxyl-terminal hydrolase 14-like isoform X1 [Lupinus angustifolius] >XP_019428534.1 PREDICTED: ubiquitin carboxyl-terminal hydrolase 14-like isoform X2 [Lupinus angustifolius] >OIV90254.1 hypothetical protein TanjilG_11982 [Lupinus angustifolius]	PF00443;PF17807;PF00627;PF02148;PF13423	Ubiquitin carboxyl-terminal hydrolase;Variant UBP zinc finger;UBA/TS-N domain;Zn-finger in ubiquitin-hydrolases and other protein;Ubiquitin carboxyl-terminal hydrolase
TRINITY_DN10030_c2_g1			O:Posttranslational modification, protein turnover, chaperones	PREDICTED: ubiquitin carboxyl-terminal hydrolase 14-like isoform X1 [Lupinus angustifolius] >XP_019428534.1 PREDICTED: ubiquitin carboxyl-terminal hydrolase 14-like isoform X2 [Lupinus angustifolius] >OIV90254.1 hypothetical protein TanjilG_11982 [Lupinus angustifolius]
TRINITY_DN100306_c0_g1	CC:integral component of membrane;BP:malate transport;CC:plant-type vacuole membrane		S:Function unknown	PREDICTED: aluminum-activated malate transporter 12-like isoform X1 [Lupinus angustifolius]	PF11744;PF13515;PF04632	Aluminium activated malate transporter;Fusaric acid resistance protein-like;Fusaric acid resistance protein family
TRINITY_DN10032_c0_g1	MF:isomerase activity;CC:mitochondrion;MF:ketol-acid reductoisomerase activity;CC:chloroplast;BP:valine biosynthetic process;BP:isoleucine biosynthetic process;MF:metal ion binding;BP:branched-chain amino acid biosynthetic process	Pantothenate and CoA biosynthesis;Valine, leucine and isoleucine biosynthesis	E:Amino acid transport and metabolism	PREDICTED: ketol-acid reductoisomerase, chloroplastic-like [Lupinus angustifolius] >OIW20797.1 hypothetical protein TanjilG_23177 [Lupinus angustifolius]	PF01450;PF07991	Acetohydroxy acid isomeroreductase, catalytic domain;Acetohydroxy acid isomeroreductase, NADPH-binding domain
TRINITY_DN100320_c0_g1			S:Function unknown	PREDICTED: uncharacterized protein LOC109336802 [Lupinus angustifolius] >XP_019429172.1 PREDICTED: uncharacterized protein LOC109336802 [Lupinus angustifolius] >OIV90299.1 hypothetical protein TanjilG_13154 [Lupinus angustifolius]	PF13563	2'-5' RNA ligase superfamily
TRINITY_DN100321_c0_g1	CC:integral component of membrane;CC:cell;MF:peroxiredoxin activity;BP:cell redox homeostasis;MF:peroxidase activity;CC:chloroplast		O:Posttranslational modification, protein turnover, chaperones	RecName: Full=2-Cys peroxiredoxin BAS1, chloroplastic; AltName: Full=Thiol-specific antioxidant protein; Flags: Precursor >CAA84396.1 bas1 protein, partial [Hordeum vulgare subsp. vulgare]	PF00578;PF08534;PF10417	AhpC/TSA family;Redoxin;C-terminal domain of 1-Cys peroxiredoxin
TRINITY_DN100323_c0_g3	MF:metal ion binding;MF:lactoylglutathione lyase activity	Pyruvate metabolism	S:Function unknown	hypothetical protein Ahy_A03g017051 isoform E [Arachis hypogaea]
TRINITY_DN10033_c0_g1	CC:cytoplasm;CC:nucleus;CC:cell;BP:cell redox homeostasis;MF:electron carrier activity;MF:protein disulfide oxidoreductase activity;MF:thioredoxin-disulfide reductase activity		O:Posttranslational modification, protein turnover, chaperones	hypothetical protein TanjilG_22527 [Lupinus angustifolius]	PF00462	Glutaredoxin
TRINITY_DN10033_c0_g2	CC:cytoplasm;CC:nucleus;CC:cell;BP:cell redox homeostasis;MF:electron carrier activity;MF:protein disulfide oxidoreductase activity;MF:thioredoxin-disulfide reductase activity		O:Posttranslational modification, protein turnover, chaperones	PREDICTED: monothiol glutaredoxin-S11-like [Lupinus angustifolius] >OIV91297.1 hypothetical protein TanjilG_01828 [Lupinus angustifolius]	PF00462	Glutaredoxin
TRINITY_DN100332_c0_g1			S:Function unknown;S:Function unknown	hypothetical protein TanjilG_01584 [Lupinus angustifolius]
TRINITY_DN100333_c0_g1	MF:protein dimerization activity;MF:O-methyltransferase activity	Stilbenoid, diarylheptanoid and gingerol biosynthesis	S:Function unknown	hypothetical protein TanjilG_29203 [Lupinus angustifolius]
TRINITY_DN100333_c0_g2	MF:L-dopa O-methyltransferase activity;MF:protein dimerization activity;MF:O-methyltransferase activity;MF:catechol O-methyltransferase activity;MF:orcinol O-methyltransferase activity	Stilbenoid, diarylheptanoid and gingerol biosynthesis	S:Function unknown	hypothetical protein TanjilG_29203 [Lupinus angustifolius]	PF00891	O-methyltransferase domain
TRINITY_DN10034_c0_g1			S:Function unknown	PREDICTED: E3 ubiquitin protein ligase DRIP2-like isoform X2 [Lupinus angustifolius]
TRINITY_DN100341_c0_g1	BP:ubiquitin-dependent protein catabolic process			hypothetical protein B296_00003247 [Ensete ventricosum]	PF03152	Ubiquitin fusion degradation protein UFD1
TRINITY_DN100346_c0_g1
TRINITY_DN100348_c0_g2	MF:methyltransferase activity;BP:intracellular protein transport;CC:endosome;CC:cell		S:Function unknown	PREDICTED: Down syndrome critical region protein 3 homolog [Lupinus angustifolius]
TRINITY_DN10035_c0_g2			S:Function unknown	PREDICTED: uncharacterized protein LOC109355983 isoform X1 [Lupinus angustifolius]
TRINITY_DN10035_c1_g2	MF:DNA-directed DNA polymerase activity;MF:catalytic activity	RNA transport	S:Function unknown	Retrovirus-related Pol polyprotein LINE-1 [Cajanus cajan]
TRINITY_DN10035_c3_g1	MF:DNA-directed DNA polymerase activity;MF:RNA-directed DNA polymerase activity;MF:zinc ion binding;BP:oxidation-reduction process		S:Function unknown	hypothetical protein KK1_011782 [Cajanus cajan]
TRINITY_DN100350_c0_g1	MF:thiosulfate sulfurtransferase activity		P:Inorganic ion transport and metabolism	PREDICTED: thiosulfate sulfurtransferase 18 [Lupinus angustifolius] >OIW09638.1 hypothetical protein TanjilG_28237 [Lupinus angustifolius]
TRINITY_DN10036_c0_g1	MF:protein serine/threonine kinase activity;CC:integral component of membrane;BP:signal transduction;MF:ATP binding		T:Signal transduction mechanisms	PREDICTED: CBL-interacting serine/threonine-protein kinase 10-like [Lupinus angustifolius] >OIW16095.1 hypothetical protein TanjilG_18810 [Lupinus angustifolius]	PF00069;PF07714;PF03822;PF14531	Protein kinase domain;Protein tyrosine kinase;NAF domain;Kinase-like
TRINITY_DN100361_c1_g1	MF:3-beta-hydroxy-delta5-steroid dehydrogenase activity;CC:integral component of membrane;BP:steroid biosynthetic process;CC:endoplasmic reticulum membrane	Steroid biosynthesis	S:Function unknown	PREDICTED: 3beta-hydroxysteroid-dehydrogenase/decarboxylase-like [Lupinus angustifolius] >XP_019437820.1 PREDICTED: 3beta-hydroxysteroid-dehydrogenase/decarboxylase-like [Lupinus angustifolius] >OIV89100.1 hypothetical protein TanjilG_27886 [Lupinus angustifolius] >OIW14959.1 hypothetical protein TanjilG_30678 [Lupinus angustifolius]	PF13976;PF01073;PF07993;PF01370	GAG-pre-integrase domain;3-beta hydroxysteroid dehydrogenase/isomerase family;Male sterility protein;NAD dependent epimerase/dehydratase family
TRINITY_DN100366_c0_g1	MF:metal ion binding;BP:metal ion transport			hypothetical protein TanjilG_06840 [Lupinus angustifolius]
TRINITY_DN100367_c0_g1
TRINITY_DN100371_c0_g1				PREDICTED: uncharacterized protein LOC109352884 [Lupinus angustifolius]
TRINITY_DN10038_c0_g1	MF:DNA binding		S:Function unknown	PREDICTED: zinc-finger homeodomain protein 9-like [Lupinus angustifolius] >OIW12451.1 hypothetical protein TanjilG_04200 [Lupinus angustifolius]	PF04770	ZF-HD protein dimerisation region
TRINITY_DN100380_c0_g1	CC:integral component of membrane;BP:N-glycan processing		S:Function unknown	PREDICTED: uncharacterized protein LOC109350802 [Lupinus angustifolius] >OIW09339.1 hypothetical protein TanjilG_01310 [Lupinus angustifolius]
TRINITY_DN10039_c0_g1	CC:integral component of membrane			PREDICTED: uncharacterized protein LOC109352643 [Lupinus angustifolius] >OIW07851.1 hypothetical protein TanjilG_19952 [Lupinus angustifolius]
TRINITY_DN100395_c0_g1	MF:RNA binding;BP:RNA processing		S:Function unknown	hypothetical protein TanjilG_14931 [Lupinus angustifolius]
TRINITY_DN1004_c0_g1	BP:sterol biosynthetic process;MF:squalene monooxygenase activity;CC:integral component of membrane;MF:flavin adenine dinucleotide binding;CC:endoplasmic reticulum	Sesquiterpenoid and triterpenoid biosynthesis;Steroid biosynthesis	C:Energy production and conversion;H:Coenzyme transport and metabolism	PREDICTED: squalene monooxygenase-like [Lupinus angustifolius] >OIW03419.1 hypothetical protein TanjilG_12016 [Lupinus angustifolius]	PF08491	Squalene epoxidase
TRINITY_DN10040_c0_g1	MF:transcription factor activity, sequence-specific DNA binding;BP:cellular response to iron ion;CC:nucleus;BP:ethylene-activated signaling pathway;MF:DNA binding	MAPK signaling pathway - plant;Plant hormone signal transduction	K:Transcription	PREDICTED: protein ETHYLENE INSENSITIVE 3-like [Lupinus angustifolius] >OIW04159.1 hypothetical protein TanjilG_00719 [Lupinus angustifolius]	PF04873	Ethylene insensitive 3
TRINITY_DN100401_c0_g1			S:Function unknown	PREDICTED: uncharacterized protein LOC109325784 isoform X1 [Lupinus angustifolius] >XP_019413890.1 PREDICTED: uncharacterized protein LOC109325784 isoform X1 [Lupinus angustifolius] >OIV99409.1 hypothetical protein TanjilG_17219 [Lupinus angustifolius]	PF12043	Domain of unknown function
TRINITY_DN100406_c0_g1	CC:extracellular region;CC:integral component of membrane;MF:copper ion binding;MF:oxidoreductase activity			PREDICTED: L-ascorbate oxidase [Lupinus angustifolius]
TRINITY_DN100406_c0_g3	CC:extracellular region;BP:positive regulation of defense response to insect;MF:copper ion binding;MF:oxidoreductase activity		S:Function unknown	PREDICTED: L-ascorbate oxidase [Lupinus angustifolius]	PF07732	Multicopper oxidase
TRINITY_DN10041_c0_g1			S:Function unknown	PREDICTED: protein NLP8-like isoform X1 [Lupinus angustifolius] >XP_019454148.1 PREDICTED: protein NLP8-like isoform X1 [Lupinus angustifolius] >XP_019454149.1 PREDICTED: protein NLP8-like isoform X1 [Lupinus angustifolius] >OIW05706.1 hypothetical protein TanjilG_23492 [Lupinus angustifolius]	PF02042;PF00564	RWP-RK domain;PB1 domain
TRINITY_DN100413_c0_g1			S:Function unknown	PREDICTED: pentatricopeptide repeat-containing protein At5g50280, chloroplastic [Lupinus angustifolius]	PF13041;PF01535;PF13812;PF12854;PF17177	PPR repeat family;PPR repeat;Pentatricopeptide repeat domain;PPR repeat;Pentacotripeptide-repeat region of PRORP
TRINITY_DN100418_c0_g1	MF:RNA-DNA hybrid ribonuclease activity;MF:nucleic acid binding			PREDICTED: uncharacterized protein LOC109329375 [Lupinus angustifolius]	PF13456	Reverse transcriptase-like
TRINITY_DN100419_c0_g1	CC:integral component of membrane		S:Function unknown	PREDICTED: formin-like protein 3 [Lupinus angustifolius] >XP_019448964.1 PREDICTED: formin-like protein 3 [Lupinus angustifolius] >OIW08410.1 hypothetical protein TanjilG_03086 [Lupinus angustifolius]	PF02181	Formin Homology 2 Domain
TRINITY_DN100419_c1_g1	CC:integral component of membrane		S:Function unknown	PREDICTED: formin-like protein 3 [Lupinus angustifolius] >XP_019448964.1 PREDICTED: formin-like protein 3 [Lupinus angustifolius] >OIW08410.1 hypothetical protein TanjilG_03086 [Lupinus angustifolius]	PF02181	Formin Homology 2 Domain
TRINITY_DN10042_c0_g1			S:Function unknown	hypothetical protein TanjilG_10716 [Lupinus angustifolius]
TRINITY_DN10042_c0_g2	CC:integral component of membrane		S:Function unknown;S:Function unknown	PREDICTED: myosin-binding protein 7-like [Lupinus angustifolius] >OIW11400.1 hypothetical protein TanjilG_10718 [Lupinus angustifolius]
TRINITY_DN10043_c0_g1	CC:integral component of membrane	SNARE interactions in vesicular transport	U:Intracellular trafficking, secretion, and vesicular transport	PREDICTED: uncharacterized protein LOC109355969 [Lupinus angustifolius]	PF09753	Membrane fusion protein Use1
TRINITY_DN100447_c0_g1			S:Function unknown	hypothetical protein TanjilG_13695 [Lupinus angustifolius]
TRINITY_DN100447_c0_g2			S:Function unknown	hypothetical protein TanjilG_13701 [Lupinus angustifolius]
TRINITY_DN100447_c0_g3			S:Function unknown	hypothetical protein TanjilG_13695 [Lupinus angustifolius]
TRINITY_DN10045_c0_g1	BP:DNA recombination;BP:DNA repair;CC:nucleus;CC:signal recognition particle;MF:GTPase activity;BP:SRP-dependent cotranslational protein targeting to membrane;MF:7S RNA binding;MF:DNA binding;BP:DNA replication;MF:GTP binding	Mismatch repair;Homologous recombination;Nucleotide excision repair;DNA replication	L:Replication, recombination and repair	similar to signal recognition particle 54 kDa protein [Lupinus angustifolius]	PF08661	Replication factor A protein 3
TRINITY_DN10046_c0_g1	CC:Golgi apparatus;MF:nucleic acid binding;BP:ATP hydrolysis coupled proton transport;MF:RNA-DNA hybrid ribonuclease activity;CC:vacuolar membrane;CC:proton-transporting V-type ATPase, V1 domain;BP:ion transmembrane transport;MF:proton-transporting ATPase activity, rotational mechanism;CC:plasma membrane	Phagosome;Oxidative phosphorylation	C:Energy production and conversion	V-type proton ATPase subunit F, partial [Glycine soja]	PF01990	ATP synthase
TRINITY_DN10046_c0_g3	CC:Golgi apparatus;BP:ATP hydrolysis coupled proton transport;CC:vacuolar membrane;CC:proton-transporting V-type ATPase, V1 domain;MF:proton-transporting ATPase activity, rotational mechanism;CC:plasma membrane	Phagosome;Oxidative phosphorylation	C:Energy production and conversion	PREDICTED: V-type proton ATPase subunit F-like [Lupinus angustifolius] >XP_019425903.1 PREDICTED: V-type proton ATPase subunit F-like [Lupinus angustifolius] >OIV91596.1 hypothetical protein TanjilG_09008 [Lupinus angustifolius]	PF01990	ATP synthase
TRINITY_DN10047_c0_g1	BP:xylan biosynthetic process;CC:Golgi apparatus;CC:integral component of membrane;BP:carbohydrate metabolic process;MF:acetyltransferase activity		S:Function unknown	PREDICTED: protein trichome birefringence-like 16 [Lupinus angustifolius]	PF13839;PF14416	GDSL/SGNH-like Acyl-Esterase family found in Pmr5 and Cas1p;PMR5 N terminal Domain
TRINITY_DN10047_c0_g2	CC:integral component of membrane		S:Function unknown	PREDICTED: protein trichome birefringence-like 16 [Lupinus angustifolius] >OIV98356.1 hypothetical protein TanjilG_16683 [Lupinus angustifolius]	PF13839;PF14416	GDSL/SGNH-like Acyl-Esterase family found in Pmr5 and Cas1p;PMR5 N terminal Domain
TRINITY_DN10048_c0_g1		Phenylalanine metabolism;Tyrosine metabolism	S:Function unknown	PREDICTED: macrophage migration inhibitory factor homolog isoform X1 [Lupinus angustifolius] >OIW07417.1 hypothetical protein TanjilG_19258 [Lupinus angustifolius]	PF01187	Macrophage migration inhibitory factor
TRINITY_DN10049_c0_g1	MF:flavin adenine dinucleotide binding;BP:fatty acid beta-oxidation;CC:peroxisome;BP:lipid homeostasis;BP:fatty acid beta-oxidation using acyl-CoA oxidase;MF:fatty acid binding;MF:acyl-CoA oxidase activity;BP:long-chain fatty acid metabolic process;MF:FAD binding	Peroxisome;alpha-Linolenic acid metabolism;Biosynthesis of unsaturated fatty acids;Fatty acid degradation	I:Lipid transport and metabolism	PREDICTED: peroxisomal acyl-coenzyme A oxidase 1-like [Lupinus angustifolius] >OIV94075.1 hypothetical protein TanjilG_05455 [Lupinus angustifolius]	PF01756	Acyl-CoA oxidase
TRINITY_DN1005_c0_g1	MF:RNA binding	Spliceosome	A:RNA processing and modification;S:Function unknown	PREDICTED: serine/arginine-rich SC35-like splicing factor SCL33 [Lupinus angustifolius] >XP_019428895.1 PREDICTED: serine/arginine-rich SC35-like splicing factor SCL33 [Lupinus angustifolius]	PF00076	RNA recognition motif.
TRINITY_DN1005_c0_g2	CC:vacuolar membrane;BP:carbohydrate metabolic process;CC:mitochondrial respiratory chain complex I;BP:mitochondrial electron transport, NADH to ubiquinone	Oxidative phosphorylation	S:Function unknown	PREDICTED: NADH dehydrogenase [ubiquinone] 1 beta subcomplex subunit 9 [Lupinus angustifolius]	PF05347	Complex 1 protein
TRINITY_DN10050_c0_g1	MF:hydrolase activity;MF:ATP binding;MF:protein kinase activity		T:Signal transduction mechanisms	PREDICTED: U-box domain-containing protein 34-like isoform X1 [Lupinus angustifolius]	PF07714;PF00069;PF00582	Protein tyrosine kinase;Protein kinase domain;Universal stress protein family
TRINITY_DN100501_c0_g1	MF:flavin adenine dinucleotide binding;MF:oxidoreductase activity, acting on CH-OH group of donors	Cutin, suberine and wax biosynthesis	E:Amino acid transport and metabolism	hypothetical protein TanjilG_05977 [Lupinus angustifolius]
TRINITY_DN10051_c0_g1	CC:integral component of membrane		S:Function unknown	PREDICTED: uncharacterized protein LOC109354533 isoform X1 [Lupinus angustifolius] >XP_019452664.1 PREDICTED: uncharacterized protein LOC109354533 isoform X1 [Lupinus angustifolius] >XP_019452665.1 PREDICTED: uncharacterized protein LOC109354533 isoform X1 [Lupinus angustifolius] >OIW06754.1 hypothetical protein TanjilG_11479 [Lupinus angustifolius]
TRINITY_DN100518_c0_g1	BP:embryo sac development;MF:hydrolase activity;BP:positive regulation of RNA polymerase II transcriptional preinitiation complex assembly;CC:macromolecular complex;MF:proteasome-activating ATPase activity;BP:pollen development;CC:nucleus;CC:membrane;BP:proteasomal protein catabolic process;CC:cytoplasm;BP:regulation of transcription from RNA polymerase II promoter;BP:protein catabolic process;CC…	Proteasome		26S protease regulatory subunit 6A-like [Spatholobus suberectus]
TRINITY_DN10052_c0_g1	MF:RNA binding		S:Function unknown	PREDICTED: YTH domain-containing family protein 1-like [Lupinus angustifolius]	PF04146	YT521-B-like domain
TRINITY_DN10052_c0_g2	MF:RNA binding		S:Function unknown	PREDICTED: uncharacterized protein LOC109360893 isoform X1 [Lupinus angustifolius]	PF04146	YT521-B-like domain
TRINITY_DN100520_c0_g1	CC:nucleus;MF:protein dimerization activity;MF:nucleic acid binding	Ubiquitin mediated proteolysis;Nucleotide excision repair	L:Replication, recombination and repair	PREDICTED: DNA damage-binding protein 1a [Lupinus angustifolius] >OIW20840.1 hypothetical protein TanjilG_24308 [Lupinus angustifolius]
TRINITY_DN100523_c0_g1	CC:nucleus;MF:ligase activity;MF:zinc ion binding;MF:SUMO transferase activity		S:Function unknown	hypothetical protein TanjilG_11292 [Lupinus angustifolius]	PF02891;PF11789;PF04810	MIZ/SP-RING zinc finger;Zinc-finger of the MIZ type in Nse subunit;Sec23/Sec24 zinc finger
TRINITY_DN100523_c1_g1	CC:nucleus;MF:ligase activity;MF:zinc ion binding;MF:SUMO transferase activity		S:Function unknown	hypothetical protein TanjilG_11290 [Lupinus angustifolius]
TRINITY_DN10053_c0_g1	MF:carbonate dehydratase activity;MF:zinc ion binding	Nitrogen metabolism	P:Inorganic ion transport and metabolism	PREDICTED: alpha carbonic anhydrase 1, chloroplastic isoform X1 [Lupinus angustifolius] >XP_019461964.1 PREDICTED: alpha carbonic anhydrase 1, chloroplastic isoform X1 [Lupinus angustifolius] >XP_019461965.1 PREDICTED: alpha carbonic anhydrase 1, chloroplastic isoform X1 [Lupinus angustifolius] >OIW01466.1 hypothetical protein TanjilG_19392 [Lupinus angustifolius]	PF00194	Eukaryotic-type carbonic anhydrase
TRINITY_DN100530_c0_g1	CC:chloroplast envelope;BP:starch catabolic process;MF:starch, H2O dikinase activity;MF:maltodextrin water dikinase;CC:chloroplast stroma;BP:cold acclimation;BP:response to symbiotic fungus;CC:mitochondrion;MF:kinase activity;MF:alpha-glucan, water dikinase activity;MF:protein histidine kinase activity;MF:metal ion binding;MF:ATP binding		S:Function unknown	alpha-glucan water dikinase, chloroplastic-like isoform X2 [Prosopis alba]
TRINITY_DN10054_c0_g1	BP:cobalamin biosynthetic process;MF:sirohydrochlorin cobaltochelatase activity		H:Coenzyme transport and metabolism	PREDICTED: sirohydrochlorin ferrochelatase, chloroplastic [Lupinus angustifolius]	PF01903	CbiX
TRINITY_DN10055_c0_g1			S:Function unknown	PREDICTED: uncharacterized protein LOC109344894 [Lupinus angustifolius] >OIW12857.1 hypothetical protein TanjilG_24790 [Lupinus angustifolius]
TRINITY_DN100558_c0_g1	MF:metal ion binding;MF:protein serine/threonine phosphatase activity;MF:magnesium-dependent protein serine/threonine phosphatase activity		T:Signal transduction mechanisms	hypothetical protein TanjilG_09291 [Lupinus angustifolius]	PF00481	Protein phosphatase 2C
TRINITY_DN100559_c0_g1	MF:metal ion binding;MF:nucleic acid binding		S:Function unknown	PREDICTED: uncharacterized protein LOC109334425 [Lupinus angustifolius] >OIW17077.1 hypothetical protein TanjilG_15660 [Lupinus angustifolius]
TRINITY_DN10056_c0_g1				PREDICTED: uncharacterized protein LOC109352947 [Lupinus angustifolius]
TRINITY_DN10056_c0_g2	CC:retrotransposon nucleocapsid;BP:DNA integration;MF:nucleic acid binding			PREDICTED: uncharacterized protein LOC109352947 [Lupinus angustifolius]
TRINITY_DN10056_c0_g3				PREDICTED: uncharacterized protein LOC109352947 [Lupinus angustifolius]
TRINITY_DN100560_c0_g1				hypothetical protein TanjilG_22495 [Lupinus angustifolius]
TRINITY_DN100560_c0_g2				hypothetical protein TanjilG_22495 [Lupinus angustifolius]
TRINITY_DN100564_c0_g1	CC:integral component of membrane		O:Posttranslational modification, protein turnover, chaperones	PREDICTED: E3 ubiquitin-protein ligase ATL6-like [Lupinus angustifolius] >OIW13557.1 hypothetical protein TanjilG_29298 [Lupinus angustifolius]	PF13639;PF17123;PF12678;PF13923;PF00097;PF12861;PF14634;PF13445;PF17120;PF13920;PF11793	Ring finger domain;RING-like zinc finger;RING-H2 zinc finger domain;Zinc finger, C3HC4 type ;Zinc finger, C3HC4 type ;Anaphase-promoting complex subunit 11 RING-H2 finger;zinc-RING finger domain;RING-type zinc-finger;Zinc-ribbon, C4HC2 type;Zinc finger, C3HC4 type ;FANCL C-terminal domain
TRINITY_DN100567_c1_g1	CC:chloroplast		S:Function unknown	hypothetical protein F511_02222 [Dorcoceras hygrometricum]
TRINITY_DN10057_c0_g1	MF:RNA binding		S:Function unknown	hypothetical protein TanjilG_14376 [Lupinus angustifolius]
TRINITY_DN100573_c0_g1	BP:RNA metabolic process;MF:sequence-specific DNA binding;MF:RNA binding;MF:single-stranded DNA binding		S:Function unknown	hypothetical protein TanjilG_20443 [Lupinus angustifolius]
TRINITY_DN100579_c0_g2	MF:hydrolase activity;MF:ADP binding		S:Function unknown	hypothetical protein TanjilG_06647 [Lupinus angustifolius]	PF13855;PF12799	Leucine rich repeat;Leucine Rich repeats
TRINITY_DN10058_c0_g1	BP:mRNA processing;CC:ribonucleoprotein complex;MF:RNA binding;MF:mRNA binding	Spliceosome	S:Function unknown	PREDICTED: UBP1-associated protein 2A-like [Lupinus angustifolius] >XP_019442853.1 PREDICTED: UBP1-associated protein 2A-like [Lupinus angustifolius] >XP_019442854.1 PREDICTED: UBP1-associated protein 2A-like [Lupinus angustifolius] >OIW12258.1 hypothetical protein TanjilG_06047 [Lupinus angustifolius]	PF00076;PF16367	RNA recognition motif. ;RNA recognition motif
TRINITY_DN100586_c0_g1	BP:protein ubiquitination;CC:nucleus;BP:ubiquitin-dependent protein catabolic process;CC:SCF ubiquitin ligase complex		S:Function unknown	hypothetical protein OsJ_09549 [Oryza sativa Japonica Group]
TRINITY_DN10059_c0_g1	CC:integral component of membrane		U:Intracellular trafficking, secretion, and vesicular transport	PREDICTED: uncharacterized protein slp1 [Lupinus angustifolius] >XP_019449553.1 PREDICTED: uncharacterized protein slp1 [Lupinus angustifolius] >XP_019449554.1 PREDICTED: uncharacterized protein slp1 [Lupinus angustifolius]	PF07738;PF06588	Sad1 / UNC-like C-terminal;Muskelin N-terminus
TRINITY_DN100592_c0_g1	MF:dihydroneopterin aldolase activity;BP:tetrahydrofolate biosynthetic process;BP:folic acid biosynthetic process		S:Function unknown	hypothetical protein TanjilG_00293 [Lupinus angustifolius]
TRINITY_DN1006_c0_g1	MF:protein dimerization activity;CC:nucleus	Circadian rhythm - plant;Plant hormone signal transduction	K:Transcription;K:Transcription	PREDICTED: transcription factor PIL1-like isoform X3 [Lupinus angustifolius]	PF00010	Helix-loop-helix DNA-binding domain
TRINITY_DN1006_c0_g2	MF:protein dimerization activity;CC:nucleus	Circadian rhythm - plant;Plant hormone signal transduction	K:Transcription;K:Transcription	hypothetical protein TanjilG_05336 [Lupinus angustifolius]
TRINITY_DN10060_c0_g1	CC:nucleus;MF:ligase activity;MF:zinc ion binding;MF:SUMO transferase activity			PREDICTED: E3 SUMO-protein ligase SIZ1-like isoform X1 [Lupinus angustifolius] >OIW05794.1 hypothetical protein TanjilG_23580 [Lupinus angustifolius]
TRINITY_DN100608_c0_g1	MF:methyltransferase activity;CC:nucleus			PREDICTED: putative lysine-specific demethylase JMJ16 isoform X2 [Lupinus angustifolius] >OIW05058.1 hypothetical protein TanjilG_02765 [Lupinus angustifolius]
TRINITY_DN10061_c0_g1	MF:alpha-L-arabinofuranosidase activity;MF:hydrolase activity, hydrolyzing O-glycosyl compounds;MF:beta-glucosidase activity;CC:plant-type cell wall;MF:scopolin beta-glucosidase activity;BP:xylan catabolic process;BP:arabinan catabolic process;BP:carbohydrate metabolic process;MF:xylan 1,4-beta-xylosidase activity		G:Carbohydrate transport and metabolism	hypothetical protein TanjilG_09255 [Lupinus angustifolius]	PF01915;PF14310	Glycosyl hydrolase family 3 C-terminal domain;Fibronectin type III-like domain
TRINITY_DN10061_c0_g2	MF:alpha-L-arabinofuranosidase activity;CC:integral component of membrane;MF:hydrolase activity, hydrolyzing O-glycosyl compounds;CC:plant-type cell wall;BP:xylan catabolic process;BP:arabinan catabolic process;BP:carbohydrate metabolic process;MF:xylan 1,4-beta-xylosidase activity		G:Carbohydrate transport and metabolism	PREDICTED: probable beta-D-xylosidase 7 [Lupinus angustifolius]	PF01915;PF00933;PF14310	Glycosyl hydrolase family 3 C-terminal domain;Glycosyl hydrolase family 3 N terminal domain;Fibronectin type III-like domain
TRINITY_DN100611_c0_g1	BP:protein phosphorylation;CC:integral component of membrane;MF:protein kinase activity;MF:transmembrane receptor protein serine/threonine kinase activity;MF:transmembrane receptor protein tyrosine kinase activity;MF:non-membrane spanning protein tyrosine kinase activity;CC:plasma membrane;MF:ATP binding		S:Function unknown	hypothetical protein TanjilG_13085 [Lupinus angustifolius]
TRINITY_DN100614_c0_g1	CC:retrotransposon nucleocapsid;MF:transcription cofactor activity;MF:DNA-directed DNA polymerase activity;BP:DNA integration;BP:regulation of transcription from RNA polymerase II promoter;MF:nucleic acid binding;CC:mediator complex			Retrovirus-related Pol polyprotein from transposon TNT 1-94, partial [Cajanus cajan]
TRINITY_DN10062_c0_g1			S:Function unknown	PREDICTED: coiled-coil domain-containing protein 158 isoform X1 [Lupinus angustifolius] >OIV91801.1 hypothetical protein TanjilG_14380 [Lupinus angustifolius]
TRINITY_DN10062_c0_g2			S:Function unknown	PREDICTED: coiled-coil domain-containing protein 158 isoform X1 [Lupinus angustifolius] >OIV91801.1 hypothetical protein TanjilG_14380 [Lupinus angustifolius]	PF10093;PF11559;PF12718	Elongation-Factor P ;Afadin- and alpha -actinin-Binding;Tropomyosin like
TRINITY_DN10063_c0_g1	BP:protein metabolic process;MF:hydrolase activity;MF:ATP binding;CC:chloroplast			hypothetical protein TanjilG_06478 [Lupinus angustifolius]	PF02151	UvrB/uvrC motif
TRINITY_DN100632_c0_g1				hypothetical protein TanjilG_06051 [Lupinus angustifolius]
TRINITY_DN100633_c0_g1			S:Function unknown	PREDICTED: uncharacterized protein LOC109342875 isoform X2 [Lupinus angustifolius]	PF07911	Protein of unknown function
TRINITY_DN100635_c0_g1	CC:integral component of membrane			PREDICTED: uncharacterized protein LOC109363027 [Lupinus angustifolius] >OIV99823.1 hypothetical protein TanjilG_26161 [Lupinus angustifolius]
TRINITY_DN10064_c0_g1	BP:xylan catabolic process;MF:endo-1,4-beta-xylanase activity;BP:carbohydrate metabolic process;MF:hydrolase activity, hydrolyzing O-glycosyl compounds		G:Carbohydrate transport and metabolism	PREDICTED: uncharacterized protein LOC109353634 isoform X2 [Lupinus angustifolius]	PF00331;PF02018	Glycosyl hydrolase family 10;Carbohydrate binding domain
TRINITY_DN10065_c0_g1	CC:integral component of membrane;MF:ubiquinol-cytochrome-c reductase activity;MF:RNA-DNA hybrid ribonuclease activity;CC:mitochondrial inner membrane;MF:nucleic acid binding;CC:respiratory chain		O:Posttranslational modification, protein turnover, chaperones	PREDICTED: uncharacterized protein LOC109344625 [Lupinus angustifolius]	PF13966	zinc-binding in reverse transcriptase
TRINITY_DN10065_c0_g2	MF:RNA-DNA hybrid ribonuclease activity;MF:nucleic acid binding			PREDICTED: uncharacterized protein LOC109332502 [Lupinus angustifolius]	PF13966	zinc-binding in reverse transcriptase
TRINITY_DN100651_c0_g1
TRINITY_DN10066_c0_g1				hypothetical protein TanjilG_29690 [Lupinus angustifolius]
TRINITY_DN10067_c0_g1	BP:protein transport;CC:integral component of Golgi membrane	SNARE interactions in vesicular transport	S:Function unknown	PREDICTED: bet1-like protein At4g14600 [Lupinus angustifolius] >OIW21842.1 hypothetical protein TanjilG_12951 [Lupinus angustifolius]
TRINITY_DN10067_c0_g2	BP:protein transport;MF:SNAP receptor activity;CC:Golgi trans cisterna;CC:integral component of Golgi membrane;CC:SNARE complex	SNARE interactions in vesicular transport	S:Function unknown;S:Function unknown;U:Intracellular trafficking, secretion, and vesicular transport	PREDICTED: bet1-like protein At4g14600 [Lupinus angustifolius]
TRINITY_DN10068_c0_g1	MF:transmembrane transporter activity;CC:integral component of membrane		S:Function unknown	uncharacterized protein At4g15545 [Abrus precatorius]	PF12329	TATA element modulatory factor 1 DNA binding
TRINITY_DN100685_c0_g2	MF:methyltransferase activity;MF:methyl jasmonate methylesterase activity;BP:methylation;MF:jasmonate O-methyltransferase activity;MF:S-adenosylmethionine-dependent methyltransferase activity		S:Function unknown	PREDICTED: salicylate carboxymethyltransferase-like isoform X2 [Lupinus angustifolius] >OIW20828.1 hypothetical protein TanjilG_23988 [Lupinus angustifolius]	PF03492	SAM dependent carboxyl methyltransferase
TRINITY_DN10069_c0_g1	CC:cytoplasm;CC:Rab-protein geranylgeranyltransferase complex;BP:protein geranylgeranylation;MF:protein prenyltransferase activity		O:Posttranslational modification, protein turnover, chaperones	PREDICTED: geranylgeranyl transferase type-2 subunit alpha 1-like [Lupinus angustifolius] >OIW04319.1 hypothetical protein TanjilG_32511 [Lupinus angustifolius]
TRINITY_DN100694_c0_g1	CC:nucleus;MF:DNA binding		S:Function unknown	hypothetical protein TanjilG_07983 [Lupinus angustifolius]	PF01429	Methyl-CpG binding domain
TRINITY_DN100697_c0_g1	CC:cytoplasm;BP:microtubule-based process;BP:mitotic cell cycle;CC:cytosol;MF:GTPase activity;MF:structural constituent of cytoskeleton;BP:microtubule cytoskeleton organization;CC:plasma membrane;CC:microtubule;MF:GTP binding	Phagosome	T:Signal transduction mechanisms	hypothetical protein BRARA_B00991 [Brassica rapa]	PF00091	Tubulin/FtsZ family, GTPase domain
TRINITY_DN1007_c0_g1	CC:integral component of membrane		U:Intracellular trafficking, secretion, and vesicular transport	PREDICTED: purine permease 1-like [Lupinus angustifolius]	PF16913;PF00892	Purine nucleobase transmembrane transport;EamA-like transporter family
TRINITY_DN10072_c0_g1	CC:cytoplasm;MF:translation initiation factor activity	RNA transport	J:Translation, ribosomal structure and biogenesis	PREDICTED: eukaryotic translation initiation factor-like [Lupinus angustifolius]	PF01652	Eukaryotic initiation factor 4E
TRINITY_DN100722_c0_g1	MF:RNA-directed DNA polymerase activity;BP:DNA integration;MF:aspartic-type endopeptidase activity;MF:nucleic acid binding			uncharacterized protein LOC109792117 [Cajanus cajan]	PF17919;PF00078;PF17917;PF17921	RNase H-like domain found in reverse transcriptase;Reverse transcriptase ;RNase H-like domain found in reverse transcriptase;Integrase zinc binding domain
TRINITY_DN100727_c0_g1			S:Function unknown	PREDICTED: BTB/POZ domain-containing protein At5g67385-like [Lupinus angustifolius] >OIW10929.1 hypothetical protein TanjilG_27875 [Lupinus angustifolius]	PF03000	NPH3 family
TRINITY_DN100727_c0_g2			S:Function unknown	PREDICTED: BTB/POZ domain-containing protein At5g67385 isoform X3 [Lupinus angustifolius] >XP_019421016.1 PREDICTED: BTB/POZ domain-containing protein At5g67385 isoform X3 [Lupinus angustifolius] >OIV94698.1 hypothetical protein TanjilG_25922 [Lupinus angustifolius]	PF03000	NPH3 family
TRINITY_DN10073_c0_g1	CC:nucleus;MF:carbohydrate binding;CC:chloroplast		S:Function unknown;S:Function unknown	PREDICTED: LOW QUALITY PROTEIN: pentatricopeptide repeat-containing protein At1g19720-like [Lupinus angustifolius]	PF01419	Jacalin-like lectin domain
TRINITY_DN100730_c0_g1	BP:mitotic DNA replication checkpoint;BP:mitotic cell cycle;CC:integral component of membrane;BP:nuclear DNA replication;BP:mitotic DNA damage checkpoint;MF:zinc ion binding;MF:nucleic acid binding;BP:replication fork protection;CC:nucleus;CC:spliceosomal complex		S:Function unknown	PREDICTED: zinc finger protein 830 isoform X2 [Lupinus angustifolius]
TRINITY_DN100739_c0_g1				PREDICTED: uncharacterized protein LOC109357020 isoform X3 [Lupinus angustifolius]
TRINITY_DN10074_c0_g1	BP:positive regulation of superoxide dismutase activity;BP:protein folding;MF:transition metal ion binding;MF:ATP binding		O:Posttranslational modification, protein turnover, chaperones	PREDICTED: 20 kDa chaperonin, chloroplastic-like [Lupinus angustifolius] >XP_019417802.1 PREDICTED: 20 kDa chaperonin, chloroplastic-like [Lupinus angustifolius] >OIV97343.1 hypothetical protein TanjilG_07095 [Lupinus angustifolius]	PF00166	Chaperonin 10 Kd subunit
TRINITY_DN10074_c0_g2	BP:positive regulation of superoxide dismutase activity;BP:protein folding;MF:transition metal ion binding;MF:ATP binding		O:Posttranslational modification, protein turnover, chaperones	PREDICTED: 20 kDa chaperonin, chloroplastic-like [Lupinus angustifolius] >XP_019417802.1 PREDICTED: 20 kDa chaperonin, chloroplastic-like [Lupinus angustifolius] >OIV97343.1 hypothetical protein TanjilG_07095 [Lupinus angustifolius]	PF00166	Chaperonin 10 Kd subunit
TRINITY_DN10074_c0_g3	BP:positive regulation of superoxide dismutase activity;BP:protein folding;MF:transition metal ion binding;MF:ATP binding		O:Posttranslational modification, protein turnover, chaperones	PREDICTED: 20 kDa chaperonin, chloroplastic-like [Lupinus angustifolius] >XP_019415728.1 PREDICTED: 20 kDa chaperonin, chloroplastic-like [Lupinus angustifolius] >OIV98350.1 hypothetical protein TanjilG_16677 [Lupinus angustifolius]	PF00166	Chaperonin 10 Kd subunit
TRINITY_DN100742_c0_g1	CC:retrotransposon nucleocapsid;BP:DNA integration;MF:nucleic acid binding			Retrovirus-related Pol polyprotein from transposon TNT 1-94 [Cajanus cajan]
TRINITY_DN100744_c0_g2	MF:zinc ion binding;MF:nucleic acid binding			PREDICTED: uncharacterized protein LOC109350594 [Lupinus angustifolius]
TRINITY_DN100748_c0_g1				hypothetical protein TanjilG_13211 [Lupinus angustifolius]
TRINITY_DN100750_c1_g1			S:Function unknown	PREDICTED: uncharacterized protein LOC109359226 [Lupinus angustifolius] >OIW02870.1 hypothetical protein TanjilG_29646 [Lupinus angustifolius]
TRINITY_DN10076_c0_g1			S:Function unknown	hypothetical protein TanjilG_01013 [Lupinus angustifolius]
TRINITY_DN10076_c0_g2			S:Function unknown	hypothetical protein TanjilG_06180 [Lupinus angustifolius]
TRINITY_DN100766_c0_g1	MF:nucleic acid binding;MF:ATP binding;MF:helicase activity		L:Replication, recombination and repair	PREDICTED: uncharacterized protein LOC109326999 isoform X1 [Lupinus angustifolius]	PF00240	Ubiquitin family
TRINITY_DN10077_c0_g1		Protein processing in endoplasmic reticulum	O:Posttranslational modification, protein turnover, chaperones	PREDICTED: hsp70 nucleotide exchange factor fes1-like [Lupinus angustifolius] >OIW18900.1 hypothetical protein TanjilG_25343 [Lupinus angustifolius]
TRINITY_DN10078_c0_g1	MF:NADH dehydrogenase ;CC:mitochondrion	Oxidative phosphorylation		PREDICTED: NADH dehydrogenase [ubiquinone] 1 beta subcomplex subunit 7-like [Lupinus angustifolius] >OIV91277.1 hypothetical protein TanjilG_01808 [Lupinus angustifolius]	PF05676	NADH-ubiquinone oxidoreductase B18 subunit
TRINITY_DN100781_c0_g1	BP:DNA integration;MF:RNA-DNA hybrid ribonuclease activity;MF:nucleic acid binding			hypothetical protein A4A49_65774, partial [Nicotiana attenuata]
TRINITY_DN100782_c0_g1			Z:Cytoskeleton	hypothetical protein TanjilG_16004 [Lupinus angustifolius]
TRINITY_DN100783_c0_g4				hypothetical protein TanjilG_20972 [Lupinus angustifolius]
TRINITY_DN100786_c0_g1	BP:phosphatidylinositol biosynthetic process;CC:integral component of membrane;CC:endosome membrane;CC:extrinsic component of vacuolar membrane;CC:PAS complex		U:Intracellular trafficking, secretion, and vesicular transport	Protein VAC14-like [Vitis vinifera]
TRINITY_DN100786_c1_g1	BP:phosphatidylinositol biosynthetic process;CC:PAS complex		U:Intracellular trafficking, secretion, and vesicular transport	hypothetical protein TanjilG_10093 [Lupinus angustifolius]
TRINITY_DN100787_c0_g1	CC:cytosol;MF:NADPH;MF:oxidoreductase activity		Z:Cytoskeleton	uncharacterized protein LOC100813682 [Glycine max] >ACU22674.1 unknown [Glycine max] >KRH10765.1 hypothetical protein GLYMA_15G068300 [Glycine max]
TRINITY_DN10079_c0_g1			S:Function unknown	PREDICTED: uncharacterized protein LOC109333254 [Lupinus angustifolius] >OIV92736.1 hypothetical protein TanjilG_00870 [Lupinus angustifolius]
TRINITY_DN10079_c0_g3			S:Function unknown	PREDICTED: uncharacterized protein LOC109331687 [Lupinus angustifolius] >OIV94373.1 hypothetical protein TanjilG_25435 [Lupinus angustifolius]
TRINITY_DN1008_c0_g1	MF:ATP binding;MF:protein kinase activity		T:Signal transduction mechanisms	PREDICTED: serine/threonine-protein kinase HT1-like isoform X2 [Lupinus angustifolius]	PF07714;PF00069;PF17667	Protein tyrosine kinase;Protein kinase domain;Fungal protein kinase
TRINITY_DN1008_c0_g2	MF:ATP binding;MF:protein kinase activity		T:Signal transduction mechanisms	PREDICTED: serine/threonine-protein kinase HT1-like isoform X3 [Lupinus angustifolius]	PF07714;PF00069	Protein tyrosine kinase;Protein kinase domain
TRINITY_DN10080_c0_g1	CC:cytoplasm;MF:acid-amino acid ligase activity;BP:biosynthetic process;BP:regulation of cell shape;MF:ATP binding;CC:chloroplast nucleoid;BP:chloroplast fission;BP:cell division		M:Cell wall/membrane/envelope biogenesis	hypothetical protein TanjilG_24533 [Lupinus angustifolius]	PF08245;PF02875;PF01225	Mur ligase middle domain;Mur ligase family, glutamate ligase domain;Mur ligase family, catalytic domain
TRINITY_DN10080_c0_g2	CC:cytoplasm;MF:acid-amino acid ligase activity;BP:biosynthetic process;BP:regulation of cell shape;MF:ATP binding;CC:chloroplast nucleoid;BP:chloroplast fission;BP:cell division		M:Cell wall/membrane/envelope biogenesis	hypothetical protein TanjilG_24529 [Lupinus angustifolius]
TRINITY_DN10081_c0_g1			S:Function unknown	PREDICTED: uncharacterized protein LOC109326598 [Lupinus angustifolius] >OIV97736.1 hypothetical protein TanjilG_12493 [Lupinus angustifolius]
TRINITY_DN100823_c0_g1	CC:integral component of membrane;CC:endoplasmic reticulum;MF:hydrolase activity, acting on ester bonds;CC:vacuolar membrane		U:Intracellular trafficking, secretion, and vesicular transport	hypothetical protein TanjilG_14592 [Lupinus angustifolius]	PF07819	PGAP1-like protein
TRINITY_DN100825_c0_g1	BP:carbohydrate metabolic process;MF:ATPase activity;MF:RNA binding;CC:nucleus;MF:tetrahydrofolylpolyglutamate synthase activity;BP:lipid glycosylation;BP:regulation of transcription, DNA-templated;MF:ATP binding;MF:transferase activity, transferring glycosyl groups;MF:DNA binding;CC:proteasome complex;MF:protein dimerization activity;MF:UDP-N-acetyl-D-glucosamine;MF:undecaprenyldiphospho-muramoy…		S:Function unknown	LINE-1 retrotransposable element ORF2 protein isoform A [Glycine soja] >RZC21650.1 LINE-1 retrotransposable element ORF2 protein isoform B [Glycine soja]
TRINITY_DN100825_c1_g1	CC:integral component of membrane;BP:carbohydrate metabolic process;CC:nucleus;CC:plasma membrane;BP:protein transport;MF:helicase activity;CC:transport vesicle membrane;BP:regulation of transcription, DNA-templated;MF:RNA binding;MF:DNA binding;MF:RNA-directed DNA polymerase activity;MF:undecaprenyldiphospho-muramoylpentapeptide beta-N-acetylglucosaminyltransferase activity;BP:lipid glycosylatio…		S:Function unknown	Retrovirus-related Pol polyprotein LINE-1, partial [Cajanus cajan]
TRINITY_DN10083_c0_g1	MF:phosphatidylinositol binding;MF:nucleic acid binding		S:Function unknown	PREDICTED: uncharacterized protein LOC109343381 isoform X1 [Lupinus angustifolius] >XP_019437168.1 PREDICTED: uncharacterized protein LOC109343381 isoform X1 [Lupinus angustifolius]	PF13901;PF00787	Putative zinc-RING and/or ribbon;PX domain
TRINITY_DN100832_c0_g1	CC:cytoplasm;CC:cytoskeleton;CC:plasmodesma;MF:ATP binding;CC:plasma membrane		K:Transcription	actin-binding FH2	PF00022	Actin
TRINITY_DN100832_c1_g1	CC:cytoplasm;CC:cytoskeleton;CC:plasmodesma;MF:ATP binding;CC:plasma membrane		K:Transcription	actin 11 [Sesuvium portulacastrum]	PF00022	Actin
TRINITY_DN100836_c0_g1	MF:terpene synthase activity;MF:magnesium ion binding		S:Function unknown	PREDICTED: probable terpene synthase 2 isoform X1 [Lupinus angustifolius] >OIW15246.1 hypothetical protein TanjilG_17566 [Lupinus angustifolius]	PF03936	Terpene synthase family, metal binding domain
TRINITY_DN100837_c0_g1				hypothetical protein CQW23_34958 [Capsicum baccatum]
TRINITY_DN10084_c0_g1	CC:integral component of membrane;CC:plasma membrane		S:Function unknown	PREDICTED: CASP-like protein 1E1 [Lupinus angustifolius] >OIV95392.1 hypothetical protein TanjilG_06261 [Lupinus angustifolius]	PF04535	Domain of unknown function
TRINITY_DN100844_c0_g1	CC:cytoplasm;MF:poly;CC:cytosol;CC:ribonucleoprotein complex;MF:poly;MF:RNA binding;CC:nucleus;MF:mRNA 3'-UTR binding	RNA degradation;RNA transport;mRNA surveillance pathway	S:Function unknown	PREDICTED: polyadenylate-binding protein 3-like [Lupinus angustifolius] >OIW12575.1 hypothetical protein TanjilG_04739 [Lupinus angustifolius]	PF00076	RNA recognition motif.
TRINITY_DN100849_c0_g1	MF:structural constituent of ribosome;BP:translation;CC:ribosome	Ribosome	J:Translation, ribosomal structure and biogenesis	30S ribosomal protein S7 [Phoenix dactylifera] >YP_003540993.1 30S ribosomal protein S7 [Phoenix dactylifera] >YP_006073150.1 ribosomal protein S7	PF00366	Ribosomal protein S17
TRINITY_DN10085_c0_g1	MF:RNA-DNA hybrid ribonuclease activity;MF:nucleic acid binding			PREDICTED: uncharacterized protein LOC109350589 [Lupinus angustifolius]	PF14111;PF14392	Domain of unknown function ;Zinc knuckle
TRINITY_DN100856_c0_g1	BP:ER to Golgi vesicle-mediated transport;BP:intracellular protein transport;CC:mitochondrion;CC:endoplasmic reticulum membrane;MF:zinc ion binding;MF:metal ion binding;CC:COPII vesicle coat			Protein transport protein Sec23A isoform C [Glycine soja] >RZB49175.1 Protein transport protein Sec23A isoform D [Glycine soja]
TRINITY_DN100856_c0_g2	CC:endoplasmic reticulum exit site;BP:ER to Golgi vesicle-mediated transport;CC:cytosol;BP:pollen exine formation;BP:intracellular protein transport;MF:GTPase activator activity;CC:endoplasmic reticulum membrane;MF:zinc ion binding;BP:anther wall tapetum development;CC:Golgi membrane;CC:COPII vesicle coat;BP:cargo loading into COPII-coated vesicle		U:Intracellular trafficking, secretion, and vesicular transport	hypothetical protein VIGAN_04419500 [Vigna angularis var. angularis]
TRINITY_DN100856_c1_g1	CC:endoplasmic reticulum exit site;BP:ER to Golgi vesicle-mediated transport;BP:cargo loading into COPII-coated vesicle;BP:intracellular protein transport;MF:GTPase activator activity;CC:endoplasmic reticulum membrane;MF:zinc ion binding;CC:Golgi membrane;CC:COPII vesicle coat		U:Intracellular trafficking, secretion, and vesicular transport	protein transport protein SEC23 [Arachis duranensis] >XP_016205685.1 protein transport protein SEC23 [Arachis ipaensis] >XP_025603882.1 protein transport protein SEC23 [Arachis hypogaea] >XP_025603883.1 protein transport protein SEC23 [Arachis hypogaea] >XP_025661736.1 protein transport protein SEC23 [Arachis hypogaea] >RYR52275.1 hypothetical protein Ahy_A06g027202 [Arachis hypogaea]
TRINITY_DN100858_c0_g1	MF:cystathionine beta-lyase activity;MF:lyase activity;BP:'de novo' L-methionine biosynthetic process;MF:catalytic activity;MF:pyridoxal phosphate binding;CC:integral component of membrane	Cysteine and methionine metabolism;Selenocompound metabolism	S:Function unknown	cystathionine gamma-synthase 1, chloroplastic-like [Helianthus annuus] >OTG06975.1 putative cys/Met metabolism, pyridoxal phosphate-dependent enzyme [Helianthus annuus]	PF01053	Cys/Met metabolism PLP-dependent enzyme
TRINITY_DN10086_c0_g1	MF:methyltransferase activity;MF:glycine hydroxymethyltransferase activity;BP:glycine biosynthetic process from serine;MF:pyridoxal phosphate binding;BP:tetrahydrofolate interconversion	Cyanoamino acid metabolism;Glyoxylate and dicarboxylate metabolism;One carbon pool by folate;Glycine, serine and threonine metabolism	E:Amino acid transport and metabolism	PREDICTED: serine hydroxymethyltransferase 4-like [Lupinus angustifolius] >OIW00576.1 hypothetical protein TanjilG_14802 [Lupinus angustifolius]	PF00464	Serine hydroxymethyltransferase
TRINITY_DN100861_c0_g1	MF:phosphatidylinositol binding;BP:DNA integration;MF:nucleic acid binding			PREDICTED: uncharacterized protein LOC109337284, partial [Lupinus angustifolius]
TRINITY_DN100867_c0_g1	BP:regulation of transcription, DNA-templated;MF:protein dimerization activity		K:Transcription	PREDICTED: transcription factor HBI1-like [Lupinus angustifolius] >OIV99490.1 hypothetical protein TanjilG_17300 [Lupinus angustifolius]
TRINITY_DN10087_c0_g1	MF:1-deoxy-D-xylulose-5-phosphate synthase activity;BP:terpenoid biosynthetic process	Thiamine metabolism;Terpenoid backbone biosynthesis	H:Coenzyme transport and metabolism	hypothetical protein TanjilG_16004 [Lupinus angustifolius]	PF02780	Transketolase, C-terminal domain
TRINITY_DN10087_c0_g2	MF:1-deoxy-D-xylulose-5-phosphate synthase activity;BP:terpenoid biosynthetic process	Thiamine metabolism;Terpenoid backbone biosynthesis	H:Coenzyme transport and metabolism	PREDICTED: probable 1-deoxy-D-xylulose-5-phosphate synthase 2, chloroplastic [Lupinus angustifolius]	PF02780;PF02779	Transketolase, C-terminal domain;Transketolase, pyrimidine binding domain
TRINITY_DN100872_c0_g1			Z:Cytoskeleton;Z:Cytoskeleton	PREDICTED: formin-like protein 18 [Juglans regia]	PF02181	Formin Homology 2 Domain
TRINITY_DN100872_c0_g2			Z:Cytoskeleton;S:Function unknown	PREDICTED: formin-like protein 20 [Lupinus angustifolius]	PF02181	Formin Homology 2 Domain
TRINITY_DN10088_c0_g1	CC:nucleus;MF:protein heterodimerization activity		K:Transcription	hypothetical protein CRG98_038878 [Punica granatum]	PF00808	Histone-like transcription factor
TRINITY_DN100886_c0_g1	MF:ligase activity;MF:ubiquitin-protein transferase activity;MF:transferase activity, transferring acyl groups		S:Function unknown	PREDICTED: U-box domain-containing protein 9-like [Lupinus angustifolius] >OIW01307.1 hypothetical protein TanjilG_10468 [Lupinus angustifolius]
TRINITY_DN100888_c0_g1	MF:formate-tetrahydrofolate ligase activity;MF:ATP binding	One carbon pool by folate	F:Nucleotide transport and metabolism	hypothetical protein TanjilG_30470 [Lupinus angustifolius]	PF01268	Formate--tetrahydrofolate ligase
TRINITY_DN100889_c0_g1	MF:actin binding;MF:kinase activity			hypothetical protein L195_g021514 [Trifolium pratense]
TRINITY_DN10089_c0_g1			E:Amino acid transport and metabolism	PREDICTED: patellin-6-like [Lupinus angustifolius] >OIW19072.1 hypothetical protein TanjilG_10633 [Lupinus angustifolius]	PF00650;PF03765	CRAL/TRIO domain;CRAL/TRIO, N-terminal domain
TRINITY_DN10089_c0_g2			S:Function unknown	PREDICTED: patellin-6-like [Lupinus angustifolius] >OIW00875.1 hypothetical protein TanjilG_12816 [Lupinus angustifolius]	PF00650;PF03765	CRAL/TRIO domain;CRAL/TRIO, N-terminal domain
TRINITY_DN100890_c0_g1	MF:endonuclease activity;MF:hydrolase activity		L:Replication, recombination and repair	uncharacterized protein LOC113713630 [Coffea arabica]	PF13087	AAA domain
TRINITY_DN1009_c0_g1	BP:mRNA 3'-end processing;CC:DNA-directed RNA polymerase II, holoenzyme;MF:RNA polymerase II core binding		S:Function unknown	PREDICTED: UPF0400 protein C337.03-like [Lupinus angustifolius] >XP_019429669.1 PREDICTED: UPF0400 protein C337.03-like [Lupinus angustifolius]	PF04818	RNA polymerase II-binding domain.
TRINITY_DN10090_c0_g1	CC:cytosolic small ribosomal subunit;CC:integral component of membrane;MF:structural constituent of ribosome;CC:ribosome;BP:translation;MF:mRNA binding	Ribosome	J:Translation, ribosomal structure and biogenesis	PREDICTED: 40S ribosomal protein S26-3-like isoform X3 [Lupinus angustifolius] >XP_019415228.1 PREDICTED: 40S ribosomal protein S26-3 [Lupinus angustifolius] >OIV98058.1 hypothetical protein TanjilG_09551 [Lupinus angustifolius]	PF01283	Ribosomal protein S26e
TRINITY_DN10090_c0_g2	MF:structural constituent of ribosome;MF:mRNA binding;CC:cytosolic small ribosomal subunit;BP:translation;CC:ribosome	Ribosome	J:Translation, ribosomal structure and biogenesis	unknown [Lotus japonicus]	PF01283	Ribosomal protein S26e
TRINITY_DN10090_c0_g3	MF:structural constituent of ribosome;MF:mRNA binding;CC:cytosolic small ribosomal subunit;BP:translation;CC:ribosome	Ribosome	J:Translation, ribosomal structure and biogenesis	PREDICTED: 40S ribosomal protein S26-2-like [Vigna angularis] >XP_020210996.1 40S ribosomal protein S26-2 [Cajanus cajan] >KOM40681.1 hypothetical protein LR48_Vigan04g087900 [Vigna angularis] >BAT79028.1 hypothetical protein VIGAN_02182300 [Vigna angularis var. angularis]	PF01283	Ribosomal protein S26e
TRINITY_DN10090_c0_g4	MF:structural constituent of ribosome;CC:integral component of membrane;BP:translation;CC:ribosome	Ribosome	J:Translation, ribosomal structure and biogenesis	PREDICTED: 40S ribosomal protein S26-3-like isoform X3 [Lupinus angustifolius] >XP_019415228.1 PREDICTED: 40S ribosomal protein S26-3 [Lupinus angustifolius] >OIV98058.1 hypothetical protein TanjilG_09551 [Lupinus angustifolius]	PF01283	Ribosomal protein S26e
TRINITY_DN10090_c3_g1	MF:structural constituent of ribosome;MF:mRNA binding;CC:cytosolic small ribosomal subunit;BP:translation;CC:ribosome	Ribosome	J:Translation, ribosomal structure and biogenesis	small subunit ribosomal protein S26e [Vigna unguiculata]	PF01283	Ribosomal protein S26e
TRINITY_DN100906_c0_g1	CC:integral component of membrane;MF:G-protein coupled receptor activity;MF:ionotropic glutamate receptor activity;CC:plasma membrane		S:Function unknown	PREDICTED: glutamate receptor 3.6-like isoform X2 [Lupinus angustifolius] >XP_019423595.1 PREDICTED: glutamate receptor 3.6-like isoform X2 [Lupinus angustifolius] >XP_019423596.1 PREDICTED: glutamate receptor 3.6-like isoform X2 [Lupinus angustifolius] >OIV93673.1 hypothetical protein TanjilG_16524 [Lupinus angustifolius]	PF01094	Receptor family ligand binding region
TRINITY_DN10091_c0_g1			S:Function unknown	hypothetical protein TanjilG_01486, partial [Lupinus angustifolius]
TRINITY_DN10092_c0_g1	MF:hydrolase activity		K:Transcription	PREDICTED: endo-1,3;1,4-beta-D-glucanase-like isoform X1 [Lupinus angustifolius] >OIW13965.1 hypothetical protein TanjilG_09316 [Lupinus angustifolius]	PF01738	Dienelactone hydrolase family
TRINITY_DN100925_c0_g1				Tubby-like F-box protein 5 [Glycine soja]
TRINITY_DN100926_c0_g1	MF:transferase activity;MF:mRNA binding		S:Function unknown;L:Replication, recombination and repair	PREDICTED: uncharacterized protein LOC109336780 isoform X1 [Lupinus angustifolius] >OIW16779.1 hypothetical protein TanjilG_05513 [Lupinus angustifolius]
TRINITY_DN100926_c0_g2	MF:nucleotidyltransferase activity		S:Function unknown	Poly
TRINITY_DN10093_c0_g1	CC:cytoplasm;CC:exon-exon junction complex;BP:exon-exon junction complex disassembly;MF:RNA binding	RNA transport;mRNA surveillance pathway	K:Transcription	PREDICTED: partner of Y14 and mago-like [Lupinus angustifolius] >OIW20836.1 hypothetical protein TanjilG_24304 [Lupinus angustifolius]	PF09282	Mago binding
TRINITY_DN10094_c0_g1	MF:azobenzene reductase activity		P:Inorganic ion transport and metabolism	PREDICTED: uncharacterized protein ycf39 [Lupinus angustifolius]	PF05368;PF13460;PF01370;PF01073	NmrA-like family;NAD;NAD dependent epimerase/dehydratase family;3-beta hydroxysteroid dehydrogenase/isomerase family
TRINITY_DN100957_c0_g1	CC:integral component of membrane		U:Intracellular trafficking, secretion, and vesicular transport	hypothetical protein TanjilG_31154 [Lupinus angustifolius]	PF16913;PF04142;PF08627;PF00892	Purine nucleobase transmembrane transport;Nucleotide-sugar transporter;CRT-like, chloroquine-resistance transporter-like;EamA-like transporter family
TRINITY_DN10096_c0_g1	CC:integral component of membrane		S:Function unknown	hypothetical protein TanjilG_17684 [Lupinus angustifolius]
TRINITY_DN100961_c0_g1
TRINITY_DN100965_c0_g1	CC:integral component of membrane			hypothetical protein TanjilG_10052 [Lupinus angustifolius]
TRINITY_DN100967_c0_g1	CC:retrotransposon nucleocapsid;BP:DNA integration;MF:methylmalonate-semialdehyde dehydrogenase ;MF:nucleic acid binding			uncharacterized protein LOC107613047 [Arachis ipaensis]	PF16588	C2H2 zinc-finger
TRINITY_DN10097_c0_g1	MF:zinc ion binding;MF:microtubule-severing ATPase activity		S:Function unknown	PREDICTED: pentatricopeptide repeat-containing protein At3g24000, mitochondrial [Lupinus angustifolius]	PF01535;PF13041;PF14432;PF12854;PF13812;PF17177	PPR repeat;PPR repeat family;DYW family of nucleic acid deaminases;PPR repeat;Pentatricopeptide repeat domain;Pentacotripeptide-repeat region of PRORP
TRINITY_DN100974_c0_g1	BP:UTP biosynthetic process;BP:CTP biosynthetic process;MF:nucleoside diphosphate kinase activity;BP:GTP biosynthetic process;MF:ATP binding	Pyrimidine metabolism;MAPK signaling pathway - plant;Purine metabolism	U:Intracellular trafficking, secretion, and vesicular transport	nucleoside diphosphate kinase-like [Quercus suber]	PF00334	Nucleoside diphosphate kinase
TRINITY_DN100979_c0_g1	CC:cytoplasm;BP:activation of protein kinase activity;BP:stress-activated protein kinase signaling cascade;MF:protein serine/threonine kinase activity;MF:ATP binding;MF:protein kinase activity;MF:MAP kinase kinase kinase activity;BP:signal transduction by protein phosphorylation		T:Signal transduction mechanisms	PREDICTED: mitogen-activated protein kinase kinase kinase NPK1-like [Lupinus angustifolius] >OIW09709.1 hypothetical protein TanjilG_21235 [Lupinus angustifolius]	PF00069;PF07714	Protein kinase domain;Protein tyrosine kinase
TRINITY_DN10098_c0_g1	CC:transcription factor complex;BP:negative regulation of transcription from RNA polymerase II promoter;CC:nucleus;BP:positive regulation of transcription from RNA polymerase II promoter;MF:RNA polymerase II activating transcription factor binding;BP:negative regulation of transcription, DNA-templated;BP:multicellular organism development		K:Transcription	PREDICTED: transcriptional corepressor SEUSS-like isoform X1 [Lupinus angustifolius] >XP_019434290.1 PREDICTED: transcriptional corepressor SEUSS-like isoform X1 [Lupinus angustifolius] >XP_019434291.1 PREDICTED: transcriptional corepressor SEUSS-like isoform X1 [Lupinus angustifolius] >OIW21960.1 hypothetical protein TanjilG_18101 [Lupinus angustifolius]
TRINITY_DN100980_c0_g1	MF:ATP binding	Protein export;Protein processing in endoplasmic reticulum	O:Posttranslational modification, protein turnover, chaperones	predicted protein [Hordeum vulgare subsp. vulgare]	PF00012;PF06723	Hsp70 protein;MreB/Mbl protein
TRINITY_DN100988_c0_g1				PREDICTED: casein kinase 1-like protein 2 isoform X2 [Lupinus angustifolius] >OIW08991.1 hypothetical protein TanjilG_05967 [Lupinus angustifolius]
TRINITY_DN100989_c0_g2	MF:zinc ion binding;MF:nucleic acid binding		S:Function unknown	glycine-rich RNA-binding protein 2, mitochondrial-like isoform X2 [Abrus precatorius]	PF00313	'Cold-shock' DNA-binding domain
TRINITY_DN10099_c0_g1	CC:integral component of membrane		S:Function unknown	PREDICTED: reticulon-like protein B22 [Lupinus angustifolius]	PF02453	Reticulon
TRINITY_DN100995_c0_g1
TRINITY_DN101_c0_g1	MF:hydrolase activity;BP:phosphatidylinositol dephosphorylation;MF:phosphatidylinositol-4,5-bisphosphate 5-phosphatase activity;BP:inositol phosphate dephosphorylation		T:Signal transduction mechanisms	PREDICTED: type II inositol polyphosphate 5-phosphatase 15-like [Lupinus angustifolius] >OIV90737.1 hypothetical protein TanjilG_21868 [Lupinus angustifolius]	PF03372	Endonuclease/Exonuclease/phosphatase family
TRINITY_DN1010_c0_g1			S:Function unknown	PREDICTED: zinc finger CCCH domain-containing protein 13 isoform X2 [Lupinus angustifolius]
TRINITY_DN10100_c0_g1			S:Function unknown	hypothetical protein TanjilG_12694 [Lupinus angustifolius]
TRINITY_DN101005_c0_g1	MF:structural constituent of ribosome;BP:translation;CC:ribosome	Ribosome	S:Function unknown	60S ribosomal protein L12-like [Camellia sinensis]	PF03946;PF00298	Ribosomal protein L11, N-terminal domain;Ribosomal protein L11, RNA binding domain
TRINITY_DN101005_c0_g2	MF:structural constituent of ribosome;BP:translation;CC:ribosome	Ribosome	S:Function unknown	predicted protein [Hordeum vulgare subsp. vulgare]	PF01780	Ribosomal L37ae protein family
TRINITY_DN101006_c0_g1				hypothetical protein TanjilG_01880 [Lupinus angustifolius]
TRINITY_DN10101_c0_g1	MF:hydrolase activity		S:Function unknown	PREDICTED: uncharacterized protein LOC109359564 [Lupinus angustifolius]	PF12697;PF00561;PF12146	Alpha/beta hydrolase family;alpha/beta hydrolase fold;Serine aminopeptidase, S33
TRINITY_DN10101_c0_g2	CC:retrotransposon nucleocapsid;BP:DNA integration;MF:nucleic acid binding			PREDICTED: uncharacterized protein LOC109352928 [Lupinus angustifolius]
TRINITY_DN101010_c0_g1	CC:retrotransposon nucleocapsid;BP:DNA integration;MF:RNA-directed DNA polymerase activity;MF:zinc ion binding;MF:nucleic acid binding		L:Replication, recombination and repair;S:Function unknown	Copia protein, partial [Cajanus cajan]	PF07727	Reverse transcriptase
TRINITY_DN101011_c0_g1	MF:structural constituent of ribosome;BP:translation;CC:ribosome	Ribosome	J:Translation, ribosomal structure and biogenesis	60S ribosomal protein L4-like protein [Cinnamomum micranthum f. kanehirae]	PF00935	Ribosomal protein L44
TRINITY_DN101011_c0_g2	MF:structural constituent of ribosome;BP:cytoplasmic translation;CC:ribosome;BP:translation;CC:cytosolic large ribosomal subunit	Ribosome	J:Translation, ribosomal structure and biogenesis	PREDICTED: 60S ribosomal protein L36-2-like isoform X1 [Populus euphratica]	PF01158	Ribosomal protein L36e
TRINITY_DN101017_c0_g1	CC:ribosome;CC:cytosol;MF:structural constituent of ribosome;MF:RNA binding;BP:regulation of photoperiodism, flowering;BP:translation	Ribosome	S:Function unknown	40S ribosomal protein S18 [Populus trichocarpa] >XP_011032690.1 PREDICTED: 40S ribosomal protein S18-like [Populus euphratica] >ABK92692.1 unknown [Populus trichocarpa] >PNT37880.1 hypothetical protein POPTR_005G211200 [Populus trichocarpa] >TKS03511.1 hypothetical protein D5086_0000155080 [Populus alba]	PF00416	Ribosomal protein S13/S18
TRINITY_DN10102_c0_g1	CC:MCM complex;CC:nucleus;BP:DNA replication initiation;MF:ATP binding;MF:DNA binding;MF:DNA helicase activity;BP:cell cycle	DNA replication	S:Function unknown	PREDICTED: DNA replication licensing factor MCM7 [Lupinus angustifolius] >OIW17432.1 hypothetical protein TanjilG_22544 [Lupinus angustifolius]	PF00493;PF17207;PF17855;PF14551;PF01078;PF07728	MCM P-loop domain;MCM OB domain;MCM AAA-lid domain;MCM N-terminal domain;Magnesium chelatase, subunit ChlI;AAA domain
TRINITY_DN101028_c0_g1	MF:ubiquitin protein ligase binding;BP:ubiquitin-dependent protein catabolic process	Ubiquitin mediated proteolysis;Protein processing in endoplasmic reticulum		cullin-1 [Cynara cardunculus var. scolymus] >KVH91450.1 Cullin, conserved site-containing protein [Cynara cardunculus var. scolymus]
TRINITY_DN101029_c0_g1	MF:RNA binding		A:RNA processing and modification	Splicing factor-like protein [Parasponia andersonii]	PF00076	RNA recognition motif.
TRINITY_DN10103_c0_g1	BP:regulation of transcription, DNA-templated;CC:nucleus;MF:DNA binding		S:Function unknown	PREDICTED: cyclic dof factor 3-like [Lupinus angustifolius] >OIW02139.1 hypothetical protein TanjilG_06734 [Lupinus angustifolius]
TRINITY_DN101045_c0_g1			S:Function unknown	PREDICTED: golgin candidate 5-like [Lupinus angustifolius] >XP_019457977.1 PREDICTED: golgin candidate 5-like [Lupinus angustifolius] >XP_019457978.1 PREDICTED: golgin candidate 5-like [Lupinus angustifolius] >XP_019457979.1 PREDICTED: golgin candidate 5-like [Lupinus angustifolius] >OIW03809.1 hypothetical protein TanjilG_30085 [Lupinus angustifolius]	PF12325	TATA element modulatory factor 1 TATA binding
TRINITY_DN10105_c0_g1	CC:integral component of membrane		S:Function unknown	uncharacterized protein LOC25497788 [Medicago truncatula] >KEH21990.1 AT.I.24-6 protein, putative [Medicago truncatula] >RHN44958.1 hypothetical protein MtrunA17_Chr7g0225061 [Medicago truncatula]	PF11820	Protein of unknown function
TRINITY_DN10105_c0_g2	CC:integral component of membrane		S:Function unknown	uncharacterized protein LOC25497788 [Medicago truncatula] >KEH21990.1 AT.I.24-6 protein, putative [Medicago truncatula] >RHN44958.1 hypothetical protein MtrunA17_Chr7g0225061 [Medicago truncatula]	PF11820	Protein of unknown function
TRINITY_DN101050_c0_g1	MF:serine-type endopeptidase activity		O:Posttranslational modification, protein turnover, chaperones	PREDICTED: putative protease Do-like 14 isoform X5 [Lupinus angustifolius]	PF13365	Trypsin-like peptidase domain
TRINITY_DN101050_c0_g2	MF:serine-type endopeptidase activity		O:Posttranslational modification, protein turnover, chaperones	PREDICTED: putative protease Do-like 14 isoform X5 [Lupinus angustifolius]	PF13365	Trypsin-like peptidase domain
TRINITY_DN10106_c0_g1	CC:nascent polypeptide-associated complex		K:Transcription	hypothetical protein TanjilG_06096 [Lupinus angustifolius]	PF01849	NAC domain
TRINITY_DN10106_c0_g2	CC:nascent polypeptide-associated complex		K:Transcription	N-carbamoylputrescine amidase [Eutrema salsugineum] >ESQ51183.1 hypothetical protein EUTSA_v10017003mg [Eutrema salsugineum]	PF01849;PF05285	NAC domain;SDA1
TRINITY_DN101062_c0_g2	CC:cytoplasm;MF:GTPase activator activity;MF:Rab GTPase binding;MF:syntaxin binding;MF:myosin II binding;CC:plasma membrane;BP:regulation of exocytosis		S:Function unknown	Syntaxin-binding protein 5, partial [Mucuna pruriens]
TRINITY_DN101067_c0_g1	MF:RNA-directed DNA polymerase activity;CC:integral component of membrane			PREDICTED: uncharacterized protein LOC109356226 [Lupinus angustifolius]	PF13966	zinc-binding in reverse transcriptase
TRINITY_DN101068_c0_g1	BP:response to salt stress;CC:cytosol;CC:polysomal ribosome;CC:nascent polypeptide-associated complex		S:Function unknown	Nascent polypeptide-associated complex subunit alpha-like protein [Zea mays]	PF01849	NAC domain
TRINITY_DN101068_c0_g2	MF:structural constituent of ribosome;CC:cytosolic large ribosomal subunit;BP:translation;CC:ribosome	Ribosome	J:Translation, ribosomal structure and biogenesis	60S ribosomal protein L4-1, partial [Mucuna pruriens]	PF00573;PF14374	Ribosomal protein L4/L1 family;60S ribosomal protein L4 C-terminal domain
TRINITY_DN10107_c0_g1	MF:1,3-beta-D-glucan synthase activity;BP:;CC:integral component of membrane;CC:1,3-beta-D-glucan synthase complex		S:Function unknown	PREDICTED: callose synthase 9-like [Lupinus angustifolius]	PF02364;PF14288	1,3-beta-glucan synthase component;1,3-beta-glucan synthase subunit FKS1, domain-1
TRINITY_DN10107_c0_g2	MF:1,3-beta-D-glucan synthase activity;BP:;CC:integral component of membrane;CC:1,3-beta-D-glucan synthase complex		S:Function unknown	PREDICTED: callose synthase 9-like [Lupinus angustifolius] >XP_019428290.1 PREDICTED: callose synthase 9-like [Lupinus angustifolius] >XP_019428291.1 PREDICTED: callose synthase 9-like [Lupinus angustifolius] >XP_019428292.1 PREDICTED: callose synthase 9-like [Lupinus angustifolius] >XP_019428293.1 PREDICTED: callose synthase 9-like [Lupinus angustifolius]	PF14288	1,3-beta-glucan synthase subunit FKS1, domain-1
TRINITY_DN10107_c0_g3	MF:1,3-beta-D-glucan synthase activity;BP:;CC:integral component of membrane;CC:1,3-beta-D-glucan synthase complex		S:Function unknown	hypothetical protein TanjilG_24734 [Lupinus angustifolius]	PF02364	1,3-beta-glucan synthase component
TRINITY_DN101076_c0_g2	MF:gibberellin-44 dioxygenase activity;MF:gibberellin 3-beta-dioxygenase activity;MF:metal ion binding;MF:dioxygenase activity;MF:oxidoreductase activity		S:Function unknown	PREDICTED: gibberellin 20 oxidase 2-like [Lupinus angustifolius] >OIW02460.1 hypothetical protein TanjilG_05053 [Lupinus angustifolius]	PF03171;PF14226	2OG-Fe;non-haem dioxygenase in morphine synthesis N-terminal
TRINITY_DN10108_c0_g1	CC:integral component of membrane;MF:oxidoreductase activity		I:Lipid transport and metabolism	PREDICTED: dehydrogenase/reductase SDR family member 7 [Lupinus angustifolius] >OIV89616.1 hypothetical protein TanjilG_15811 [Lupinus angustifolius]	PF00106;PF13561;PF08659;PF02719;PF13460;PF01370	short chain dehydrogenase;Enoyl-;KR domain;Polysaccharide biosynthesis protein;NAD;NAD dependent epimerase/dehydratase family
TRINITY_DN10108_c2_g2				hypothetical protein TanjilG_31662 [Lupinus angustifolius]
TRINITY_DN101080_c0_g1	CC:nucleus			unknown [Glycine max]	PF03763	Remorin, C-terminal region
TRINITY_DN101087_c0_g1
TRINITY_DN10109_c0_g1	CC:integral component of membrane;BP:transmembrane transport		P:Inorganic ion transport and metabolism	PREDICTED: cation/calcium exchanger 2-like [Lupinus angustifolius] >OIW15229.1 hypothetical protein TanjilG_08821 [Lupinus angustifolius]
TRINITY_DN10109_c0_g2	CC:integral component of membrane;BP:transmembrane transport		P:Inorganic ion transport and metabolism	PREDICTED: cation/calcium exchanger 2-like [Lupinus angustifolius] >OIW21457.1 hypothetical protein TanjilG_03824 [Lupinus angustifolius]
TRINITY_DN1011_c0_g1	CC:nucleus;BP:regulation of cell shape;BP:cytoskeleton organization;BP:regulation of transcription from RNA polymerase II promoter		S:Function unknown;S:Function unknown	PREDICTED: bromodomain and WD repeat-containing protein 3-like isoform X1 [Lupinus angustifolius] >XP_019452356.1 PREDICTED: bromodomain and WD repeat-containing protein 3-like isoform X1 [Lupinus angustifolius] >OIW07030.1 hypothetical protein TanjilG_02664 [Lupinus angustifolius]	PF00400;PF06507	WD domain, G-beta repeat;Auxin response factor
TRINITY_DN10110_c0_g1	CC:cytoplasm;CC:cytosol;BP:galactose metabolic process;BP:galactose catabolic process via UDP-galactose;MF:galactokinase activity;MF:galactose binding;MF:ATP binding		G:Carbohydrate transport and metabolism	PREDICTED: galactokinase-like [Lupinus angustifolius] >OIW20498.1 hypothetical protein TanjilG_13564 [Lupinus angustifolius]	PF10509;PF08544;PF00288	Galactokinase galactose-binding signature;GHMP kinases C terminal;GHMP kinases N terminal domain
TRINITY_DN10110_c1_g1	CC:cytoplasm;CC:cytosol;BP:galactose metabolic process;BP:galactose catabolic process via UDP-galactose;MF:galactokinase activity;MF:galactose binding;MF:ATP binding		G:Carbohydrate transport and metabolism	PREDICTED: galactokinase-like isoform X1 [Lupinus angustifolius] >XP_019463271.1 PREDICTED: galactokinase-like isoform X1 [Lupinus angustifolius] >OIW00158.1 hypothetical protein TanjilG_29148 [Lupinus angustifolius]
TRINITY_DN101108_c0_g1	BP:reciprocal meiotic recombination		S:Function unknown	uncharacterized protein LOC8279499 [Ricinus communis] >EEF43269.1 conserved hypothetical protein [Ricinus communis]
TRINITY_DN101123_c0_g1	MF:cytochrome-c oxidase activity;MF:heme binding;BP:electron transport coupled proton transport;CC:integral component of membrane;CC:mitochondrion;CC:mitochondrial inner membrane;BP:aerobic respiration;CC:respiratory chain complex IV;MF:metal ion binding;BP:oxidative phosphorylation	Oxidative phosphorylation	C:Energy production and conversion	cytochrome c oxidase subunit 1	PF00115	Cytochrome C and Quinol oxidase polypeptide I
TRINITY_DN10113_c0_g1	BP:embryo development ending in seed dormancy;CC:plasmodesma;BP:pollen development;CC:plasma membrane		S:Function unknown	PREDICTED: uncharacterized protein LOC109345701 [Lupinus angustifolius] >OIW13608.1 hypothetical protein TanjilG_07950 [Lupinus angustifolius]
TRINITY_DN101138_c0_g1	CC:BAT3 complex;BP:ER-associated ubiquitin-dependent protein catabolic process;MF:misfolded protein binding;MF:polyubiquitin binding		O:Posttranslational modification, protein turnover, chaperones	PREDICTED: uncharacterized protein LOC109352130 [Lupinus angustifolius] >XP_019449500.1 PREDICTED: uncharacterized protein LOC109352130 [Lupinus angustifolius] >OIW07931.1 hypothetical protein TanjilG_20032 [Lupinus angustifolius]
TRINITY_DN10114_c0_g1			S:Function unknown	PREDICTED: mucin-5AC-like [Lupinus angustifolius] >OIW13500.1 hypothetical protein TanjilG_29241 [Lupinus angustifolius]
TRINITY_DN10114_c0_g2			S:Function unknown	PREDICTED: mucin-5AC-like [Lupinus angustifolius] >OIW13500.1 hypothetical protein TanjilG_29241 [Lupinus angustifolius]
TRINITY_DN101142_c0_g2	MF:glucan endo-1,3-beta-glucanase activity, C-3 substituted reducing group			endochitinase PR4-like [Abrus precatorius]
TRINITY_DN101142_c0_g3	CC:integral component of membrane;CC:Golgi membrane;BP:GPI anchor biosynthetic process			hypothetical protein TanjilG_14960 [Lupinus angustifolius]
TRINITY_DN101142_c1_g1				Extracellular ligand-binding receptor [Cynara cardunculus var. scolymus]
TRINITY_DN101145_c0_g1	MF:hydrolase activity;MF:nucleoside-diphosphatase activity;MF:carbohydrate binding;MF:nucleoside-triphosphatase activity;MF:CTPase activity;MF:dUTP phosphohydrolase activity;MF:dCTP phosphohydrolase activity;MF:dATP phosphohydrolase activity;CC:plasma membrane;MF:GTP phosphohydrolase activity;MF:dTTP phosphohydrolase activity;MF:8-oxo-dGTP phosphohydrolase activity;MF:dGTP phosphohydrolase activi…	Pyrimidine metabolism;Purine metabolism	G:Carbohydrate transport and metabolism;O:Posttranslational modification, protein turnover, chaperones	PREDICTED: nucleoside-triphosphatase-like [Lupinus angustifolius] >OIW03328.1 hypothetical protein TanjilG_03437 [Lupinus angustifolius]	PF01150	GDA1/CD39
TRINITY_DN10115_c0_g1	MF:metal ion binding;MF:D-alanine-D-alanine ligase activity;BP:peptidoglycan biosynthetic process;MF:ATP binding		M:Cell wall/membrane/envelope biogenesis	PREDICTED: uncharacterized protein LOC109325683 [Lupinus angustifolius] >OIV98557.1 hypothetical protein TanjilG_12143 [Lupinus angustifolius]	PF01820;PF07478	D-ala D-ala ligase N-terminus;D-ala D-ala ligase C-terminus
TRINITY_DN10115_c5_g1	MF:metal ion binding;MF:D-alanine-D-alanine ligase activity;MF:ATP binding		M:Cell wall/membrane/envelope biogenesis	PREDICTED: uncharacterized protein LOC109325683 [Lupinus angustifolius] >OIV98557.1 hypothetical protein TanjilG_12143 [Lupinus angustifolius]
TRINITY_DN101153_c0_g1	MF:zinc ion binding	Ubiquitin mediated proteolysis;Nucleotide excision repair;Protein processing in endoplasmic reticulum	O:Posttranslational modification, protein turnover, chaperones	RING-box protein 1a [Jatropha curcas]	PF12678;PF12861;PF13639;PF13923;PF00097	RING-H2 zinc finger domain;Anaphase-promoting complex subunit 11 RING-H2 finger;Ring finger domain;Zinc finger, C3HC4 type ;Zinc finger, C3HC4 type
TRINITY_DN101154_c0_g1	MF:RNA-directed DNA polymerase activity;BP:DNA integration;CC:retrotransposon nucleocapsid;MF:nucleic acid binding			PREDICTED: uncharacterized protein LOC109326373 [Lupinus angustifolius]
TRINITY_DN101154_c0_g3	CC:retrotransposon nucleocapsid;BP:DNA integration;MF:nucleic acid binding		L:Replication, recombination and repair	PREDICTED: uncharacterized protein LOC109326700 [Lupinus angustifolius]	PF14223	gag-polypeptide of LTR copia-type
TRINITY_DN10116_c0_g1	CC:signal recognition particle, endoplasmic reticulum targeting;MF:7S RNA binding;BP:SRP-dependent cotranslational protein targeting to membrane;CC:signal recognition particle	Protein export	U:Intracellular trafficking, secretion, and vesicular transport	PREDICTED: signal recognition particle subunit SRP72-like [Lupinus angustifolius] >OIW00622.1 hypothetical protein TanjilG_09103 [Lupinus angustifolius]	PF08492;PF17004;PF12895	SRP72 RNA-binding domain;Putative TPR-like repeat;Anaphase-promoting complex, cyclosome, subunit 3
TRINITY_DN10117_c0_g1	MF:1-phosphatidylinositol-4-phosphate 5-kinase activity;MF:ATP binding	Phosphatidylinositol signaling system;Endocytosis;Inositol phosphate metabolism	T:Signal transduction mechanisms	PREDICTED: phosphatidylinositol 4-phosphate 5-kinase 5-like [Lupinus angustifolius] >XP_019429715.1 PREDICTED: phosphatidylinositol 4-phosphate 5-kinase 5-like [Lupinus angustifolius] >XP_019429717.1 PREDICTED: phosphatidylinositol 4-phosphate 5-kinase 5-like [Lupinus angustifolius] >OIW19185.1 hypothetical protein TanjilG_16829 [Lupinus angustifolius]	PF01504;PF02493	Phosphatidylinositol-4-phosphate 5-Kinase;MORN repeat
TRINITY_DN10118_c0_g1	MF:metal ion binding;MF:RNA binding		S:Function unknown	PREDICTED: zinc finger CCCH domain-containing protein 14-like [Lupinus angustifolius]	PF00642;PF18044;PF00013;PF18345;PF16131;PF14608	Zinc finger C-x8-C-x5-C-x3-H type ;CCCH-type zinc finger;KH domain;Zinc finger domain;Torus domain;RNA-binding, Nab2-type zinc finger
TRINITY_DN10119_c0_g1			S:Function unknown	PREDICTED: tubby-like F-box protein 7 [Lupinus angustifolius] >XP_019443875.1 PREDICTED: tubby-like F-box protein 7 [Lupinus angustifolius] >OIW11583.1 hypothetical protein TanjilG_26949 [Lupinus angustifolius]	PF00646;PF12937	F-box domain;F-box-like
TRINITY_DN1012_c0_g1	MF:protein serine/threonine kinase activity;BP:integrin-mediated signaling pathway;MF:ATP binding;MF:protein kinase activity		T:Signal transduction mechanisms	PREDICTED: dual specificity protein kinase shkC-like isoform X1 [Lupinus angustifolius] >XP_019464417.1 PREDICTED: dual specificity protein kinase shkC-like isoform X1 [Lupinus angustifolius]	PF07714;PF00069;PF12796;PF13637;PF13857;PF00023;PF13606	Protein tyrosine kinase;Protein kinase domain;Ankyrin repeats ;Ankyrin repeats ;Ankyrin repeats ;Ankyrin repeat;Ankyrin repeat
TRINITY_DN101207_c0_g1	MF:large ribosomal subunit rRNA binding;MF:structural constituent of ribosome;CC:ribosome;BP:translation;CC:cytosolic large ribosomal subunit	Ribosome	C:Energy production and conversion	60S ribosomal protein L23A [Oryza sativa Japonica Group] >3J61_X Chain X, Localization Of The Large Subunit Ribosomal Proteins Into A 5.5 A Cryo-em Map Of Triticum Aestivum Translating 80s Ribosome >BAB63895.1 putative 60S ribosomal protein L23A [Oryza sativa Japonica Group] >BAB93400.1 putative 60S ribosomal protein L23A [Oryza sativa Japonica Group] >BAF04888.1 Os01g0348700 [Oryza sativa Japoni…	PF00238	Ribosomal protein L14p/L23e
TRINITY_DN10121_c0_g1	MF:kinase activity		S:Function unknown	PREDICTED: MOB kinase activator-like 1B [Lupinus angustifolius] >CCH47231.1 similar to MOB kinase activator-like 1 [Lupinus angustifolius]	PF03637	Mob1/phocein family
TRINITY_DN101218_c0_g1	MF:tetrahydroberberine oxidase activity;MF:FAD binding;MF:oxidoreductase activity		C:Energy production and conversion	PREDICTED: berberine bridge enzyme-like 21 [Lupinus angustifolius] >OIV95979.1 hypothetical protein TanjilG_27083 [Lupinus angustifolius]	PF01565	FAD binding domain
TRINITY_DN10122_c0_g1	CC:cytoplasm;BP:protein phosphorylation;BP:regulation of cyclin-dependent protein serine/threonine kinase activity;MF:protein kinase binding;MF:cyclin-dependent protein serine/threonine kinase regulator activity;BP:mitotic cell cycle phase transition;CC:nucleus;CC:cyclin-dependent protein kinase holoenzyme complex		D:Cell cycle control, cell division, chromosome partitioning	PREDICTED: cyclin-D5-3-like [Lupinus angustifolius] >OIW14909.1 hypothetical protein TanjilG_30628 [Lupinus angustifolius]	PF00134;PF02984	Cyclin, N-terminal domain;Cyclin, C-terminal domain
TRINITY_DN101221_c0_g1	CC:nucleolus			hypothetical protein PHAVU_011G078700g [Phaseolus vulgaris] >XP_007132249.1 hypothetical protein PHAVU_011G078700g [Phaseolus vulgaris] >ESW04242.1 hypothetical protein PHAVU_011G078700g [Phaseolus vulgaris] >ESW04243.1 hypothetical protein PHAVU_011G078700g [Phaseolus vulgaris]
TRINITY_DN10123_c0_g1	CC:cytoplasm;BP:cellular manganese ion homeostasis;CC:integral component of membrane;CC:intracellular membrane-bounded organelle		S:Function unknown	PREDICTED: DUF21 domain-containing protein At4g14240-like [Lupinus angustifolius] >OIV91939.1 hypothetical protein TanjilG_25420 [Lupinus angustifolius]	PF01595	Cyclin M transmembrane N-terminal domain
TRINITY_DN10123_c0_g2	CC:cytoplasm;BP:cellular manganese ion homeostasis;CC:integral component of membrane;CC:intracellular membrane-bounded organelle		P:Inorganic ion transport and metabolism	PREDICTED: DUF21 domain-containing protein At4g14240 isoform X2 [Lupinus angustifolius]	PF01595	Cyclin M transmembrane N-terminal domain
TRINITY_DN10124_c0_g1	MF:sequence-specific DNA binding;MF:transcription regulatory region DNA binding;MF:transcription factor activity, sequence-specific DNA binding;CC:nucleus;BP:cell differentiation;MF:DNA binding		K:Transcription	PREDICTED: transcription factor MYB34-like [Lupinus angustifolius]	PF00249;PF13921	Myb-like DNA-binding domain;Myb-like DNA-binding domain
TRINITY_DN101262_c0_g1	BP:regulation of monopolar cell growth		S:Function unknown	PREDICTED: protein LONGIFOLIA 2-like isoform X1 [Lupinus angustifolius] >OIW18527.1 hypothetical protein TanjilG_13279 [Lupinus angustifolius]
TRINITY_DN101275_c0_g1	MF:sequence-specific DNA binding;MF:transcription regulatory region DNA binding;MF:transcription factor activity, sequence-specific DNA binding;CC:nucleus;BP:cell differentiation;MF:DNA binding		U:Intracellular trafficking, secretion, and vesicular transport	PREDICTED: transcription factor MYB39-like [Lupinus angustifolius] >OIV96751.1 hypothetical protein TanjilG_11747 [Lupinus angustifolius]	PF00249;PF13921	Myb-like DNA-binding domain;Myb-like DNA-binding domain
TRINITY_DN10128_c0_g1	MF:transferase activity, transferring hexosyl groups;MF:UDP-glycosyltransferase activity;CC:intracellular membrane-bounded organelle	Monoterpenoid biosynthesis	S:Function unknown	PREDICTED: 7-deoxyloganetin glucosyltransferase-like [Lupinus angustifolius] >OIW21362.1 hypothetical protein TanjilG_01631 [Lupinus angustifolius]	PF00201	UDP-glucoronosyl and UDP-glucosyl transferase
TRINITY_DN10128_c1_g1	MF:transferase activity, transferring hexosyl groups;MF:UDP-glycosyltransferase activity;CC:intracellular membrane-bounded organelle	Monoterpenoid biosynthesis	P:Inorganic ion transport and metabolism	PREDICTED: 7-deoxyloganetin glucosyltransferase-like [Lupinus angustifolius] >OIV91580.1 hypothetical protein TanjilG_08992 [Lupinus angustifolius]
TRINITY_DN10129_c0_g1	CC:cytoplasm;MF:transferase activity;MF:glutathione transferase activity;BP:glutathione metabolic process	Glutathione metabolism	O:Posttranslational modification, protein turnover, chaperones	glutathione S-transferase F9 [Cajanus cajan] >KYP41585.1 Glutathione S-transferase ERD13 [Cajanus cajan]	PF02798;PF13417;PF13409	Glutathione S-transferase, N-terminal domain;Glutathione S-transferase, N-terminal domain;Glutathione S-transferase, N-terminal domain
TRINITY_DN1013_c0_g1	CC:GPI-anchor transamidase complex			PREDICTED: pentatricopeptide repeat-containing protein At5g24830 [Lupinus angustifolius] >OIW08080.1 hypothetical protein TanjilG_21060 [Lupinus angustifolius]	PF13041;PF12854;PF01535;PF13812;PF17177;PF10037	PPR repeat family;PPR repeat;PPR repeat;Pentatricopeptide repeat domain;Pentacotripeptide-repeat region of PRORP;Mitochondrial 28S ribosomal protein S27
TRINITY_DN10130_c0_g1	MF:Ran GTPase binding;CC:cytosol;CC:nuclear envelope;BP:protein import into nucleus;CC:cell;CC:nucleus;BP:intracellular protein transport		O:Posttranslational modification, protein turnover, chaperones	hypothetical protein TanjilG_30404 [Lupinus angustifolius]
TRINITY_DN10131_c0_g1			S:Function unknown	PREDICTED: uncharacterized protein LOC109362774 [Lupinus angustifolius] >OIV99749.1 hypothetical protein TanjilG_26087 [Lupinus angustifolius]	PF13359	DDE superfamily endonuclease
TRINITY_DN101311_c0_g1	BP:endoplasmic reticulum unfolded protein response;MF:ubiquitin-specific protease activity involved in negative regulation of retrograde protein transport, ER to cytosol;CC:cytosol;BP:ER-associated ubiquitin-dependent protein catabolic process;BP:protein deubiquitination;MF:thiol-dependent ubiquitin-specific protease activity		O:Posttranslational modification, protein turnover, chaperones	hypothetical protein TanjilG_15803 [Lupinus angustifolius]	PF02338	OTU-like cysteine protease
TRINITY_DN101315_c0_g1				Elongation factor 1-alpha, partial [Mucuna pruriens]
TRINITY_DN101317_c0_g1	CC:ribonucleoprotein complex;MF:RNA binding;MF:mRNA binding	Spliceosome	S:Function unknown	PREDICTED: heterogeneous nuclear ribonucleoprotein A3-like [Lupinus angustifolius] >OIW17381.1 hypothetical protein TanjilG_22493 [Lupinus angustifolius]	PF00076;PF16367	RNA recognition motif. ;RNA recognition motif
TRINITY_DN10132_c0_g1	MF:isoflavone-7-O-beta-glucoside 6''-O-malonyltransferase activity;MF:transferase activity, transferring acyl groups other than amino-acyl groups		S:Function unknown	PREDICTED: phenolic glucoside malonyltransferase 1-like [Lupinus angustifolius] >OIV93932.1 hypothetical protein TanjilG_05635 [Lupinus angustifolius]	PF02458	Transferase family
TRINITY_DN10133_c0_g1	MF:glycerone kinase activity;BP:glycerol metabolic process		S:Function unknown	PREDICTED: pentatricopeptide repeat-containing protein At3g48810 [Lupinus angustifolius] >OIV95275.1 hypothetical protein TanjilG_07431 [Lupinus angustifolius]	PF13041;PF12854;PF01535;PF13812;PF17177	PPR repeat family;PPR repeat;PPR repeat;Pentatricopeptide repeat domain;Pentacotripeptide-repeat region of PRORP
TRINITY_DN10134_c0_g1	MF:D-cysteine desulfhydrase activity		S:Function unknown	PREDICTED: D-cysteine desulfhydrase 2, mitochondrial [Lupinus angustifolius] >OIV98451.1 hypothetical protein TanjilG_16778 [Lupinus angustifolius]	PF00291	Pyridoxal-phosphate dependent enzyme
TRINITY_DN101347_c0_g1				FYVE zinc finger protein [Medicago truncatula]
TRINITY_DN101348_c0_g2	CC:cytoplasm;CC:nucleus;BP:ubiquitin-dependent protein catabolic process;MF:zinc ion binding;MF:ligase activity;BP:multicellular organism development	Ubiquitin mediated proteolysis	O:Posttranslational modification, protein turnover, chaperones	PREDICTED: E3 ubiquitin-protein ligase SINAT5-like [Fragaria vesca subsp. vesca]	PF03145;PF13920	Seven in absentia protein family;Zinc finger, C3HC4 type
TRINITY_DN10135_c0_g1	MF:ATP binding;MF:protein kinase activity		T:Signal transduction mechanisms	PREDICTED: lysM domain receptor-like kinase 3 [Lupinus angustifolius] >OIV89657.1 hypothetical protein TanjilG_10663 [Lupinus angustifolius]	PF00069;PF07714	Protein kinase domain;Protein tyrosine kinase
TRINITY_DN10136_c0_g1	CC:plasma membrane		S:Function unknown	PREDICTED: senescence/dehydration-associated protein At3g51250-like isoform X2 [Lupinus angustifolius]
TRINITY_DN101360_c0_g2			S:Function unknown	PREDICTED: uncharacterized protein LOC109340251 isoform X3 [Lupinus angustifolius]
TRINITY_DN10137_c0_g1	MF:kinase activity;MF:myosin heavy chain kinase activity		S:Function unknown	PREDICTED: guanine nucleotide-binding protein subunit beta-like protein [Lupinus angustifolius] >OIW03450.1 hypothetical protein TanjilG_14675 [Lupinus angustifolius]	PF00400	WD domain, G-beta repeat
TRINITY_DN101376_c0_g1	MF:iron ion binding;MF:oxidoreductase activity, acting on paired donors, with incorporation or reduction of molecular oxygen;CC:integral component of membrane;MF:heme binding	Zeatin biosynthesis	O:Posttranslational modification, protein turnover, chaperones	PREDICTED: cytokinin hydroxylase-like [Lupinus angustifolius]
TRINITY_DN10138_c0_g1			S:Function unknown	PREDICTED: uncharacterized protein LOC109333418 isoform X1 [Lupinus angustifolius]
TRINITY_DN101381_c0_g1	MF:DNA-directed RNA polymerase activity;CC:DNA-directed RNA polymerase III complex;BP:transcription from RNA polymerase III promoter;MF:DNA binding	Pyrimidine metabolism;RNA polymerase;Purine metabolism	O:Posttranslational modification, protein turnover, chaperones	hypothetical protein CK203_083126 [Vitis vinifera]
TRINITY_DN101383_c0_g1	MF:DNA-directed DNA polymerase activity;BP:oxidation-reduction process	RNA transport	S:Function unknown	Retrovirus-related Pol polyprotein LINE-1 [Cajanus cajan]
TRINITY_DN10139_c0_g1	MF:cofactor binding		S:Function unknown	PREDICTED: uncharacterized protein LOC109353266 [Lupinus angustifolius]	PF13883	Pyridoxamine 5'-phosphate oxidase
TRINITY_DN1014_c0_g1	CC:integral component of membrane;BP:vesicle-mediated transport		U:Intracellular trafficking, secretion, and vesicular transport	PREDICTED: vesicle-associated membrane protein 721-like [Lupinus angustifolius]	PF13774;PF00957	Regulated-SNARE-like domain;Synaptobrevin
TRINITY_DN10140_c0_g1	CC:integral component of membrane;CC:chloroplast;MF:isomerase activity;BP:carotene biosynthetic process;MF:9,15,9'-tri-cis-zeta-carotene isomerase activity	Carotenoid biosynthesis	S:Function unknown	PREDICTED: 15-cis-zeta-carotene isomerase, chloroplastic-like [Lupinus angustifolius] >OIW14673.1 hypothetical protein TanjilG_33015 [Lupinus angustifolius]	PF07298	NnrU protein
TRINITY_DN10140_c1_g1	BP:fucose metabolic process;CC:integral component of membrane;MF:transferase activity, transferring glycosyl groups		S:Function unknown	hypothetical protein TanjilG_10032 [Lupinus angustifolius] >OIW00955.1 hypothetical protein TanjilG_10033 [Lupinus angustifolius]
TRINITY_DN10140_c1_g2	MF:protein dimerization activity			hypothetical protein E2542_SST04466 [Spatholobus suberectus]
TRINITY_DN10140_c3_g1	MF:actin binding;CC:integral component of membrane;BP:actin filament depolymerization;CC:actin cytoskeleton;MF:nucleic acid binding		S:Function unknown	hypothetical protein GLYMA_03G262800 [Glycine max]	PF00241	Cofilin/tropomyosin-type actin-binding protein
TRINITY_DN10141_c0_g1			S:Function unknown	hypothetical protein TanjilG_24419 [Lupinus angustifolius]
TRINITY_DN101411_c0_g2	MF:protein serine/threonine kinase activity;MF:ATP binding		T:Signal transduction mechanisms	hypothetical protein Ahy_A01g001910 isoform A [Arachis hypogaea]
TRINITY_DN101419_c0_g1	MF:terpene synthase activity;MF:magnesium ion binding	Sesquiterpenoid and triterpenoid biosynthesis	S:Function unknown	PREDICTED:
TRINITY_DN10142_c0_g1	BP:cellular manganese ion homeostasis;CC:integral component of membrane;CC:membrane;BP:intracellular sequestering of iron ion;CC:cell;MF:iron ion transmembrane transporter activity;MF:manganese ion transmembrane transporter activity		S:Function unknown	PREDICTED: vacuolar iron transporter homolog 4-like [Lupinus angustifolius] >OIW13180.1 hypothetical protein TanjilG_17536 [Lupinus angustifolius]	PF01988	VIT family
TRINITY_DN10142_c1_g1	CC:integral component of membrane		S:Function unknown	PREDICTED: vacuolar iron transporter homolog 4-like [Lupinus angustifolius] >OIV96361.1 hypothetical protein TanjilG_09788 [Lupinus angustifolius]	PF01988	VIT family
TRINITY_DN10142_c1_g2	CC:integral component of membrane		S:Function unknown	PREDICTED: vacuolar iron transporter homolog 4-like [Lupinus angustifolius] >OIV96361.1 hypothetical protein TanjilG_09788 [Lupinus angustifolius]	PF01988	VIT family
TRINITY_DN10142_c1_g3	CC:integral component of membrane		S:Function unknown	PREDICTED: vacuolar iron transporter homolog 4-like [Lupinus angustifolius] >OIV91557.1 hypothetical protein TanjilG_08969 [Lupinus angustifolius]	PF01988	VIT family
TRINITY_DN10143_c0_g1	MF:calcium ion binding		D:Cell cycle control, cell division, chromosome partitioning;T:Signal transduction mechanisms;Z:Cytoskeleton	PREDICTED: calcium-binding protein PBP1-like [Lupinus angustifolius] >XP_019426469.1 PREDICTED: calcium-binding protein PBP1-like [Lupinus angustifolius] >OIV92374.1 hypothetical protein TanjilG_09972 [Lupinus angustifolius] >OIV92376.1 hypothetical protein TanjilG_09974 [Lupinus angustifolius]	PF13833	EF-hand domain pair
TRINITY_DN10144_c0_g1	CC:microtubule;MF:microtubule binding;BP:microtubule-based movement;MF:microtubule motor activity;MF:ATP binding		Z:Cytoskeleton	PREDICTED: kinesin-like protein KIN-4C [Lupinus angustifolius] >OIW16560.1 hypothetical protein TanjilG_17733 [Lupinus angustifolius]	PF00225	Kinesin motor domain
TRINITY_DN101444_c0_g1	CC:integral component of membrane;BP:plant-type secondary cell wall biogenesis;CC:plasma membrane		S:Function unknown	PREDICTED: uncharacterized protein LOC109345695 [Lupinus angustifolius]	PF02469	Fasciclin domain
TRINITY_DN10145_c0_g1			K:Transcription	PREDICTED: uncharacterized protein LOC109336172 isoform X1 [Lupinus angustifolius]	PF04751	Protein of unknown function
TRINITY_DN101451_c0_g1	CC:cytoplasm;CC:nuclear periphery;MF:nuclear localization sequence binding;BP:ribosomal protein import into nucleus;CC:nucleus;BP:protein import into nucleus;BP:NLS-bearing protein import into nucleus;CC:nuclear membrane;MF:Ran GTPase binding		U:Intracellular trafficking, secretion, and vesicular transport	hypothetical protein PHAVU_007G029600g [Phaseolus vulgaris] >ESW14928.1 hypothetical protein PHAVU_007G029600g [Phaseolus vulgaris]
TRINITY_DN10146_c0_g1	BP:regulation of transcription, DNA-templated;CC:nucleus;MF:DNA binding		I:Lipid transport and metabolism	PREDICTED: protein ATAF2-like [Lupinus angustifolius] >OIW17808.1 hypothetical protein TanjilG_02436 [Lupinus angustifolius]
TRINITY_DN10146_c0_g2	BP:regulation of transcription, DNA-templated;CC:nucleus;MF:DNA binding		S:Function unknown;K:Transcription;K:Transcription	PREDICTED: NAC domain-containing protein 2-like [Lupinus angustifolius] >OIW00489.1 hypothetical protein TanjilG_05839 [Lupinus angustifolius]	PF02365	No apical meristem
TRINITY_DN101467_c0_g1				Heavy metal-associated isoprenylated plant protein 26 [Spatholobus suberectus]	PF00447	HSF-type DNA-binding
TRINITY_DN10147_c0_g1	MF:structural constituent of ribosome;CC:ribosome;MF:RNA binding;CC:mitochondrion;BP:translation	Ribosome		PREDICTED: small ribosomal subunit protein S13, mitochondrial-like [Lupinus angustifolius] >XP_019434679.1 PREDICTED: small ribosomal subunit protein S13, mitochondrial-like [Lupinus angustifolius] >OIV89416.1 hypothetical protein TanjilG_21910 [Lupinus angustifolius]	PF00416	Ribosomal protein S13/S18
TRINITY_DN101474_c0_g1	BP:positive regulation of translation;MF:GTPase activity;CC:mitochondrial inner membrane;MF:ADP binding;CC:mitochondrial matrix;MF:ribosome binding;BP:translation;MF:GTP binding		S:Function unknown	PREDICTED: translation factor GUF1 homolog, mitochondrial [Lupinus angustifolius] >OIW01826.1 hypothetical protein TanjilG_15690 [Lupinus angustifolius]	PF06421	GTP-binding protein LepA C-terminus
TRINITY_DN10148_c1_g1	MF:structural constituent of ribosome;CC:ribosome;BP:gene silencing by RNA;BP:translation		K:Transcription	PREDICTED: factor of DNA methylation 1-like [Lupinus angustifolius] >XP_019427134.1 PREDICTED: factor of DNA methylation 1-like [Lupinus angustifolius] >XP_019427137.1 PREDICTED: factor of DNA methylation 1-like [Lupinus angustifolius] >XP_019427141.1 PREDICTED: factor of DNA methylation 1-like [Lupinus angustifolius]	PF03469;PF03468;PF03470	XH domain;XS domain;XS zinc finger domain
TRINITY_DN10149_c0_g1	MF:DNA-directed DNA polymerase activity;MF:catalytic activity	RNA transport	S:Function unknown	hypothetical protein KK1_011783, partial [Cajanus cajan]
TRINITY_DN10149_c0_g2	MF:DNA-directed DNA polymerase activity;CC:integral component of membrane;BP:oxidation-reduction process;MF:tetrahydrofolylpolyglutamate synthase activity;MF:ATP binding		S:Function unknown;S:Function unknown	Retrovirus-related Pol polyprotein LINE-1, partial [Cajanus cajan]
TRINITY_DN10149_c1_g2	CC:ER membrane protein complex;MF:DNA-directed DNA polymerase activity;MF:zinc ion binding;MF:ADP binding;MF:DNA binding;MF:RNA-directed DNA polymerase activity;CC:proteasome complex;MF:protein dimerization activity;MF:ATP binding		S:Function unknown;S:Function unknown;S:Function unknown	LINE-1 retrotransposable element ORF2 protein isoform A [Glycine soja] >RZB57351.1 LINE-1 retrotransposable element ORF2 protein isoform B [Glycine soja]
TRINITY_DN101496_c0_g1	CC:integral component of membrane;CC:plasma membrane;MF:ATP binding;MF:protein kinase activity		S:Function unknown	PREDICTED: receptor-like protein kinase [Lupinus angustifolius] >OIV90613.1 hypothetical protein TanjilG_01694 [Lupinus angustifolius]	PF00069;PF07714;PF13855;PF12799	Protein kinase domain;Protein tyrosine kinase;Leucine rich repeat;Leucine Rich repeats
TRINITY_DN1015_c2_g1	MF:all-trans-nonaprenyl-diphosphate synthase ;CC:retrotransposon nucleocapsid;MF:DNA-directed DNA polymerase activity;BP:DNA integration;MF:zinc ion binding;MF:nucleic acid binding;MF:trans-octaprenyltranstransferase activity		L:Replication, recombination and repair;S:Function unknown	Copia protein, partial [Glycine soja]
TRINITY_DN10150_c0_g1			S:Function unknown	hypothetical protein TanjilG_26649 [Lupinus angustifolius]
TRINITY_DN10151_c0_g1	MF:scopolin beta-glucosidase activity;BP:carbohydrate metabolic process;MF:beta-glucosidase activity;MF:hydrolase activity, hydrolyzing O-glycosyl compounds	Cyanoamino acid metabolism;Starch and sucrose metabolism;Phenylpropanoid biosynthesis	G:Carbohydrate transport and metabolism	hypothetical protein TanjilG_12236 [Lupinus angustifolius]
TRINITY_DN101511_c0_g1			S:Function unknown	hypothetical protein DEO72_LG6g2627 [Vigna unguiculata]
TRINITY_DN10152_c0_g1			S:Function unknown	PREDICTED: uncharacterized protein LOC109331759 isoform X4 [Lupinus angustifolius]	PF03126	Plus-3 domain
TRINITY_DN101534_c0_g1				PREDICTED: serine/threonine-protein phosphatase 7 long form homolog [Lupinus angustifolius]
TRINITY_DN10154_c0_g1	MF:protein methyltransferase activity;MF:thiosulfate sulfurtransferase activity;MF:nucleic acid binding	Cysteine and methionine metabolism;Sulfur relay system;Sulfur metabolism	P:Inorganic ion transport and metabolism	hypothetical protein TanjilG_18200 [Lupinus angustifolius]	PF00581	Rhodanese-like domain
TRINITY_DN10155_c0_g1	BP:defense response;MF:dihydroneopterin aldolase activity;MF:2-amino-4-hydroxy-6-hydroxymethyldihydropteridine diphosphokinase activity;CC:extracellular region		S:Function unknown	PREDICTED: thaumatin-like protein 1b [Lupinus angustifolius]	PF00314;PF16483	Thaumatin family;Beta-1,3-glucanase
TRINITY_DN101552_c0_g1	CC:integral component of membrane		S:Function unknown	PREDICTED: choline transporter-like protein 2 [Lupinus angustifolius]	PF04515	Plasma-membrane choline transporter
TRINITY_DN101559_c0_g3	CC:cytoplasm;MF:inorganic diphosphatase activity;CC:cytosol;MF:magnesium ion binding;BP:phosphate-containing compound metabolic process;BP:response to cadmium ion;CC:integral component of membrane	Oxidative phosphorylation		hypothetical protein TanjilG_18224 [Lupinus angustifolius]	PF00719	Inorganic pyrophosphatase
TRINITY_DN10156_c0_g1	BP:blue light signaling pathway		S:Function unknown	PREDICTED: uncharacterized protein LOC109348317 [Lupinus angustifolius]
TRINITY_DN101568_c0_g1	MF:hydrolase activity;CC:nucleus;CC:cytosol;CC:mitochondrion		T:Signal transduction mechanisms	hypothetical protein TanjilG_25358 [Lupinus angustifolius]	PF03690	Uncharacterised protein family
TRINITY_DN10157_c0_g1	BP:cation transport;CC:integral component of membrane;CC:cell;MF:ATPase activity;BP:cellular calcium ion homeostasis;MF:metal ion binding;MF:ATP binding		P:Inorganic ion transport and metabolism	probable manganese-transporting ATPase PDR2 [Abrus precatorius]
TRINITY_DN101571_c0_g1	CC:integral component of membrane		S:Function unknown	PREDICTED: transmembrane protein 18-like [Lupinus angustifolius]	PF14770	Transmembrane protein 18
TRINITY_DN101575_c0_g1	MF:tubulin binding;MF:ubiquitin protein ligase binding;MF:S100 protein binding		S:Function unknown	PREDICTED: calcyclin-binding protein-like [Lupinus angustifolius] >OIW10221.1 hypothetical protein TanjilG_27972 [Lupinus angustifolius]	PF09032	Siah interacting protein, N terminal
TRINITY_DN101579_c0_g1	MF:phosphoric ester hydrolase activity;CC:integral component of membrane;BP:phosphatidylinositol dephosphorylation;MF:phosphatidylinositol-4-phosphate phosphatase activity;CC:endoplasmic reticulum		S:Function unknown	Phosphatidylinositide phosphatase SAC1 [Cajanus cajan]	PF02383	SacI homology domain
TRINITY_DN10158_c0_g1	MF:kinase activity		S:Function unknown	PREDICTED: WD repeat domain-containing protein 83 [Lupinus angustifolius] >OIW18185.1 hypothetical protein TanjilG_31305 [Lupinus angustifolius]	PF00400;PF12894;PF17005;PF08553	WD domain, G-beta repeat;Anaphase-promoting complex subunit 4 WD40 domain;WD40-like domain;VID27 C-terminal WD40-like domain
TRINITY_DN101582_c0_g1	BP:response to cobalt ion;BP:zinc ion homeostasis;CC:integral component of membrane;MF:cation-transporting ATPase activity;BP:cadmium ion transport;BP:response to zinc ion;BP:metal ion transport;CC:plasmodesma;CC:plasma membrane;BP:response to cadmium ion;BP:zinc II ion transport;MF:metal ion binding;MF:ATP binding		S:Function unknown	hypothetical protein TanjilG_13447 [Lupinus angustifolius]
TRINITY_DN101587_c0_g1	MF:catalytic activity;BP:biosynthetic process;MF:pyridoxal phosphate binding;MF:transaminase activity	Isoquinoline alkaloid biosynthesis;Tropane, piperidine and pyridine alkaloid biosynthesis;Phenylalanine, tyrosine and tryptophan biosynthesis;Phenylalanine metabolism;Tyrosine metabolism	O:Posttranslational modification, protein turnover, chaperones	bifunctional epoxide hydrolase 2-like [Vigna unguiculata] >QCD87785.1 soluble epoxide hydrolase [Vigna unguiculata]
TRINITY_DN101588_c0_g1	MF:cysteine-type peptidase activity	Phagosome	O:Posttranslational modification, protein turnover, chaperones	predicted protein [Hordeum vulgare subsp. vulgare]	PF00112	Papain family cysteine protease
TRINITY_DN10159_c0_g1	CC:phragmoplast;CC:spindle;MF:microtubule minus-end binding;BP:megagametogenesis;BP:microgametogenesis;CC:HAUS complex;BP:spindle assembly		S:Function unknown	PREDICTED: AUGMIN subunit 6-like isoform X1 [Lupinus angustifolius] >OIV90126.1 hypothetical protein TanjilG_01580 [Lupinus angustifolius]
TRINITY_DN1016_c0_g1	BP:regulation of transcription, DNA-templated;CC:nucleus;BP:auxin-activated signaling pathway;MF:DNA binding	Plant hormone signal transduction	K:Transcription	PREDICTED: auxin response factor 19-like isoform X4 [Lupinus angustifolius]
TRINITY_DN1016_c1_g1	BP:regulation of transcription, DNA-templated;CC:nucleus;BP:auxin-activated signaling pathway;MF:DNA binding	Plant hormone signal transduction	K:Transcription	PREDICTED: auxin response factor 19-like isoform X2 [Lupinus angustifolius]	PF06507;PF02362	Auxin response factor;B3 DNA binding domain
TRINITY_DN1016_c1_g2	BP:regulation of transcription, DNA-templated;CC:nucleus;BP:auxin-activated signaling pathway;MF:DNA binding		K:Transcription	PREDICTED: auxin response factor 7-like [Lupinus angustifolius] >XP_019443458.1 PREDICTED: auxin response factor 7-like [Lupinus angustifolius] >OIW19343.1 hypothetical protein TanjilG_03477 [Lupinus angustifolius]	PF06507;PF02309	Auxin response factor;AUX/IAA family
TRINITY_DN1016_c5_g1	BP:regulation of transcription, DNA-templated;CC:nucleus;BP:auxin-activated signaling pathway;MF:DNA binding		K:Transcription	PREDICTED: auxin response factor 19-like isoform X1 [Lupinus angustifolius]
TRINITY_DN10160_c0_g2	CC:integral component of membrane;MF:hydrogen-exporting ATPase activity, phosphorylative mechanism;CC:endoplasmic reticulum;MF:ATP binding		P:Inorganic ion transport and metabolism	PREDICTED: calcium-transporting ATPase 1, endoplasmic reticulum-type-like [Lupinus angustifolius] >OIW11219.1 hypothetical protein TanjilG_28310 [Lupinus angustifolius]	PF13246	Cation transport ATPase
TRINITY_DN101602_c0_g3
TRINITY_DN101608_c0_g1	BP:protein transport;MF:ATP binding;MF:protein kinase activity			hypothetical protein Ahy_B09g099868 isoform A [Arachis hypogaea]
TRINITY_DN10161_c0_g1			S:Function unknown	PREDICTED: thylakoid lumenal 17.4 kDa protein, chloroplastic-like isoform X2 [Lupinus angustifolius]
TRINITY_DN101614_c0_g1	MF:terpene synthase activity;MF:magnesium ion binding			PREDICTED: probable terpene synthase 2 isoform X1 [Lupinus angustifolius] >OIV94271.1 hypothetical protein TanjilG_00020 [Lupinus angustifolius]	PF03936	Terpene synthase family, metal binding domain
TRINITY_DN101618_c0_g1			S:Function unknown	PREDICTED: uncharacterized protein LOC109333396 [Lupinus angustifolius] >OIV93013.1 hypothetical protein TanjilG_20675 [Lupinus angustifolius]
TRINITY_DN101618_c1_g1			O:Posttranslational modification, protein turnover, chaperones	PREDICTED: uncharacterized protein LOC109349108 isoform X1 [Lupinus angustifolius] >OIW10653.1 hypothetical protein TanjilG_16025 [Lupinus angustifolius]
TRINITY_DN10162_c0_g1	MF:serine-type endopeptidase activity;CC:integral component of membrane		S:Function unknown	hypothetical protein TanjilG_23547 [Lupinus angustifolius]	PF01694	Rhomboid family
TRINITY_DN101624_c0_g1	BP:cell differentiation;BP:flower development		S:Function unknown	PREDICTED: FRIGIDA-like protein 3 isoform X1 [Lupinus angustifolius] >XP_019422489.1 PREDICTED: FRIGIDA-like protein 3 isoform X1 [Lupinus angustifolius] >OIV92855.1 hypothetical protein TanjilG_00989 [Lupinus angustifolius]
TRINITY_DN10163_c0_g1	MF:endonuclease activity;MF:nucleic acid binding		S:Function unknown	PREDICTED: uncharacterized protein LOC109344321 [Lupinus angustifolius]
TRINITY_DN10164_c0_g1	BP:actin filament organization;MF:actin binding;MF:DNA topoisomerase type I activity;CC:myosin complex;MF:motor activity;MF:ATP binding		Z:Cytoskeleton	PREDICTED: myosin-6-like [Lupinus angustifolius]	PF01843	DIL domain
TRINITY_DN10164_c0_g3	BP:actin filament organization;CC:integral component of membrane;MF:actin binding;MF:DNA topoisomerase type I activity;CC:myosin complex;MF:motor activity;MF:ATP binding		Z:Cytoskeleton	PREDICTED: myosin-6-like [Lupinus angustifolius]	PF01843	DIL domain
TRINITY_DN10164_c0_g4	BP:actin filament organization;MF:actin filament binding;MF:actin binding;CC:myosin complex;MF:motor activity;MF:ATP binding		Z:Cytoskeleton	hypothetical protein TanjilG_06207 [Lupinus angustifolius]
TRINITY_DN101643_c0_g1	CC:cytoplasm;BP:vesicle-mediated transport;CC:integral component of membrane;MF:GTPase activator activity;MF:Rab GTPase binding;MF:syntaxin binding;MF:myosin II binding;CC:plasma membrane;BP:regulation of exocytosis		S:Function unknown	hypothetical protein TanjilG_24322 [Lupinus angustifolius]
TRINITY_DN10165_c0_g1	BP:histone deacetylation		S:Function unknown	hypothetical protein TanjilG_02555 [Lupinus angustifolius]
TRINITY_DN101650_c0_g1	BP:maturation of SSU-rRNA from tricistronic rRNA transcript ;CC:small-subunit processome;CC:nucleolus		K:Transcription	PREDICTED: probable U3 small nucleolar RNA-associated protein 7 [Lupinus angustifolius] >OIW01716.1 hypothetical protein TanjilG_05169 [Lupinus angustifolius]
TRINITY_DN101658_c0_g1	CC:cytoplasm;BP:protein refolding;MF:ATP binding	RNA degradation	O:Posttranslational modification, protein turnover, chaperones	chaperonin GroEL [Salvia splendens]
TRINITY_DN10166_c0_g1	BP:hydrogen ion transmembrane transport;CC:integral component of membrane;CC:membrane;MF:hydrogen-translocating pyrophosphatase activity;MF:inorganic diphosphatase activity	Oxidative phosphorylation	C:Energy production and conversion	PREDICTED: pyrophosphate-energized vacuolar membrane proton pump-like [Lupinus angustifolius] >OIW19524.1 hypothetical protein TanjilG_06979 [Lupinus angustifolius]	PF03030	Inorganic H+ pyrophosphatase
TRINITY_DN101678_c0_g2
TRINITY_DN10168_c0_g2	CC:integral component of membrane		S:Function unknown	PREDICTED: thiol-disulfide oxidoreductase LTO1 [Lupinus angustifolius]	PF07884	Vitamin K epoxide reductase family
TRINITY_DN101680_c0_g1	MF:transcription factor activity, sequence-specific DNA binding;CC:nucleus;MF:DNA binding		K:Transcription	PREDICTED: ethylene-responsive transcription factor ERF109-like [Lupinus angustifolius] >OIV94314.1 hypothetical protein TanjilG_19320 [Lupinus angustifolius]	PF00847	AP2 domain
TRINITY_DN101682_c0_g1	CC:integral component of membrane;MF:beta-amylase activity;MF:amylopectin maltohydrolase activity;BP:polysaccharide catabolic process		O:Posttranslational modification, protein turnover, chaperones	hypothetical protein TanjilG_20590 [Lupinus angustifolius]
TRINITY_DN10169_c0_g1	MF:structural constituent of ribosome;MF:small ribosomal subunit rRNA binding;CC:ribosome;BP:translation;MF:rRNA binding	Ribosome	S:Function unknown	PREDICTED: 30S ribosomal protein S6 alpha, chloroplastic-like isoform X1 [Lupinus angustifolius] >OIV93996.1 hypothetical protein TanjilG_05699 [Lupinus angustifolius]	PF01250	Ribosomal protein S6
TRINITY_DN101693_c0_g1				hypothetical protein CR513_04153, partial [Mucuna pruriens]
TRINITY_DN101698_c0_g1	BP:protein targeting to peroxisome;MF:histone acetyltransferase activity;CC:cell	Peroxisome	S:Function unknown	PREDICTED: peroxisome biogenesis protein 7 [Lupinus angustifolius] >OIW20202.1 hypothetical protein TanjilG_06603 [Lupinus angustifolius]	PF00400	WD domain, G-beta repeat
TRINITY_DN1017_c0_g1	CC:integral component of membrane;MF:ATP binding;MF:protein kinase activity		M:Cell wall/membrane/envelope biogenesis	PREDICTED: leucine-rich repeat receptor-like serine/threonine/tyrosine-protein kinase SOBIR1 [Lupinus angustifolius]	PF00069;PF07714;PF13855;PF12799;PF01636	Protein kinase domain;Protein tyrosine kinase;Leucine rich repeat;Leucine Rich repeats ;Phosphotransferase enzyme family
TRINITY_DN1017_c0_g2	CC:integral component of membrane;MF:calmodulin-dependent protein kinase activity;MF:ATP binding;MF:protein kinase activity		T:Signal transduction mechanisms	PREDICTED: leucine-rich repeat receptor-like serine/threonine/tyrosine-protein kinase SOBIR1 [Lupinus angustifolius] >XP_019433524.1 PREDICTED: leucine-rich repeat receptor-like serine/threonine/tyrosine-protein kinase SOBIR1 [Lupinus angustifolius]	PF00069;PF07714;PF13855;PF12799;PF01636	Protein kinase domain;Protein tyrosine kinase;Leucine rich repeat;Leucine Rich repeats ;Phosphotransferase enzyme family
TRINITY_DN10170_c0_g1	CC:integral component of membrane		S:Function unknown	hypothetical protein TanjilG_13201 [Lupinus angustifolius]	PF05512	AWPM-19-like family
TRINITY_DN101708_c0_g1	MF:oxidoreductase activity	Fructose and mannose metabolism;Pentose and glucuronate interconversions;Glycerolipid metabolism;Folate biosynthesis;Galactose metabolism	S:Function unknown	Aldolase-type TIM barrel [Cynara cardunculus var. scolymus]	PF00248	Aldo/keto reductase family
TRINITY_DN10171_c0_g1	MF:kinase activity;MF:polysaccharide binding		S:Function unknown	hypothetical protein E2542_SST19346 [Spatholobus suberectus]	PF13947;PF14380	Wall-associated receptor kinase galacturonan-binding;Wall-associated receptor kinase C-terminal
TRINITY_DN101714_c0_g1			S:Function unknown	PREDICTED: pirin-like protein [Lupinus angustifolius] >OIW12811.1 hypothetical protein TanjilG_24744 [Lupinus angustifolius]
TRINITY_DN101716_c0_g3	MF:structural constituent of ribosome;CC:large ribosomal subunit;BP:translation	Ribosome	S:Function unknown	60S ribosomal protein L27-3 [Apostasia shenzhenica]	PF16906;PF00467	Ribosomal proteins L26 eukaryotic, L24P archaeal;KOW motif
TRINITY_DN101718_c0_g1	MF:methyltransferase activity;CC:integral component of membrane		S:Function unknown	PREDICTED: probable methyltransferase PMT26 [Lupinus angustifolius] >OIW17818.1 hypothetical protein TanjilG_02446 [Lupinus angustifolius]	PF03141	Putative S-adenosyl-L-methionine-dependent methyltransferase
TRINITY_DN101718_c1_g1	MF:methyltransferase activity;CC:integral component of membrane		S:Function unknown	PREDICTED: probable methyltransferase PMT26 [Lupinus angustifolius] >OIW17818.1 hypothetical protein TanjilG_02446 [Lupinus angustifolius]	PF03141	Putative S-adenosyl-L-methionine-dependent methyltransferase
TRINITY_DN10172_c0_g1	MF:ligase activity;MF:ubiquitin-protein transferase activity;MF:transferase activity, transferring acyl groups		S:Function unknown	PREDICTED: U-box domain-containing protein 43-like [Lupinus angustifolius] >XP_019449841.1 PREDICTED: U-box domain-containing protein 43-like [Lupinus angustifolius] >OIW07764.1 hypothetical protein TanjilG_12890 [Lupinus angustifolius]	PF04564;PF13513;PF05659	U-box domain;HEAT-like repeat;Arabidopsis broad-spectrum mildew resistance protein RPW8
TRINITY_DN101722_c0_g1	MF:cyclin-dependent protein serine/threonine kinase activator activity;CC:cyclin/CDK positive transcription elongation factor complex;CC:nucleus;BP:positive regulation of DNA-templated transcription, elongation;MF:cyclin-dependent protein serine/threonine kinase regulator activity;BP:regulation of transcription from RNA polymerase II promoter		D:Cell cycle control, cell division, chromosome partitioning;K:Transcription;L:Replication, recombination and repair	cyclin-T1-5 isoform X2 [Cajanus cajan]
TRINITY_DN101722_c0_g2	MF:cyclin-dependent protein serine/threonine kinase activator activity;CC:cyclin/CDK positive transcription elongation factor complex;CC:nucleus;BP:positive regulation of DNA-templated transcription, elongation;MF:cyclin-dependent protein serine/threonine kinase regulator activity;BP:regulation of transcription from RNA polymerase II promoter		D:Cell cycle control, cell division, chromosome partitioning;K:Transcription;L:Replication, recombination and repair	PREDICTED: cyclin-T1-5-like [Lupinus angustifolius] >XP_019426083.1 PREDICTED: cyclin-T1-5-like [Lupinus angustifolius] >OIV92507.1 hypothetical protein TanjilG_02270 [Lupinus angustifolius]
TRINITY_DN101726_c0_g1	CC:retrotransposon nucleocapsid;BP:DNA integration;MF:zinc ion binding;MF:nucleic acid binding		S:Function unknown;L:Replication, recombination and repair	copia LTR rider [Solanum lycopersicum] >ABO36636.1 copia LTR rider [Solanum lycopersicum]	PF00098	Zinc knuckle
TRINITY_DN101726_c0_g2	CC:retrotransposon nucleocapsid;CC:integral component of membrane;MF:DNA-directed DNA polymerase activity;BP:DNA integration;MF:zinc ion binding;MF:nucleic acid binding;BP:transmembrane transport		S:Function unknown;L:Replication, recombination and repair	copia LTR rider, partial [Trifolium pratense]
TRINITY_DN10173_c0_g1	CC:integral component of membrane;MF:metalloendopeptidase activity;MF:ATP binding		S:Function unknown	PREDICTED: uncharacterized protein LOC109330324 [Lupinus angustifolius] >XP_019420026.1 PREDICTED: uncharacterized protein LOC109330324 [Lupinus angustifolius]
TRINITY_DN101737_c0_g1	BP:protein phosphorylation;CC:integral component of membrane;MF:carbohydrate binding;MF:protein serine/threonine kinase activity;MF:transmembrane receptor protein tyrosine kinase activity;CC:plasma membrane;MF:ATP binding		T:Signal transduction mechanisms	PREDICTED: G-type lectin S-receptor-like serine/threonine-protein kinase LECRK3 [Lupinus angustifolius] >XP_019465353.1 PREDICTED: G-type lectin S-receptor-like serine/threonine-protein kinase LECRK3 [Lupinus angustifolius] >OIW17644.1 hypothetical protein TanjilG_28994 [Lupinus angustifolius]	PF08276	PAN-like domain
TRINITY_DN101738_c0_g1	BP:cell wall biogenesis;BP:carbohydrate metabolic process;BP:cellular glucan metabolic process;CC:cell wall;CC:integral component of membrane;CC:apoplast;BP:cell wall organization;MF:xyloglucan;MF:hydrolase activity, hydrolyzing O-glycosyl compounds;BP:xyloglucan metabolic process		G:Carbohydrate transport and metabolism	hypothetical protein GOBAR_DD24494 [Gossypium barbadense]	PF00722	Glycosyl hydrolases family 16
TRINITY_DN10174_c0_g1	BP:cellular lipid metabolic process		S:Function unknown	PREDICTED: putative lipase YDL109C [Lupinus angustifolius]	PF05057;PF07819;PF02089;PF01764	Putative serine esterase ;PGAP1-like protein;Palmitoyl protein thioesterase;Lipase
TRINITY_DN101745_c1_g1			S:Function unknown	PREDICTED: 14 kDa proline-rich protein DC2.15-like isoform X2 [Lupinus angustifolius]	PF14547;PF00234	Hydrophobic seed protein;Protease inhibitor/seed storage/LTP family
TRINITY_DN10175_c0_g2		RNA degradation	S:Function unknown	PREDICTED: nuclear nucleic acid-binding protein C1D-like [Lupinus angustifolius] >OIW09299.1 hypothetical protein TanjilG_01270 [Lupinus angustifolius]	PF04000	Sas10/Utp3/C1D family
TRINITY_DN101756_c0_g1	CC:large ribosomal subunit;CC:ribosome;CC:cytosolic large ribosomal subunit;MF:structural constituent of ribosome;BP:negative regulation of translation;BP:translation;MF:mRNA binding	Ribosome	S:Function unknown;S:Function unknown	uncharacterized protein LOC100499978 [Glycine max] >XP_028181119.1 60S ribosomal protein L13a-4-like [Glycine soja] >ACU14471.1 unknown [Glycine max] >KRH36792.1 hypothetical protein GLYMA_09G024000 [Glycine max] >RZB90285.1 60S ribosomal protein L13a-4 [Glycine soja]	PF00572	Ribosomal protein L13
TRINITY_DN101756_c0_g2	BP:cell redox homeostasis;MF:protein-disulfide reductase activity;CC:cell		S:Function unknown	probable nucleoredoxin 1-2 [Oryza sativa Japonica Group] >Q7Y0F2.1 RecName: Full=Probable nucleoredoxin 1-2; Short=OsNrx1-2 >AAP50932.1 putative trypanothione-dependent peroxidase [Oryza sativa Japonica Group] >ABF96516.1 PDI, putative, expressed [Oryza sativa Japonica Group] >EEE59229.1 hypothetical protein OsJ_11208 [Oryza sativa Japonica Group] >BAS84632.1 Os03g0405900 [Oryza sativa Japonica G…	PF13905;PF00085;PF08534;PF00578;PF13098;PF14595	Thioredoxin-like;Thioredoxin;Redoxin;AhpC/TSA family;Thioredoxin-like domain;Thioredoxin
TRINITY_DN10176_c0_g1			S:Function unknown	PREDICTED: uncharacterized protein LOC109343523 [Lupinus angustifolius]	PF01190	Pollen proteins Ole e I like
TRINITY_DN101761_c0_g1	MF:histone binding;BP:chromatin remodeling;BP:DNA repair;BP:DNA duplex unwinding;BP:ATP-dependent chromatin remodeling;CC:Ino80 complex;BP:regulation of transcription from RNA polymerase II promoter in response to stress;MF:helicase activity;BP:transcription, DNA-templated;MF:ATPase activity;MF:DNA binding;BP:nucleosome mobilization;MF:ATP binding		L:Replication, recombination and repair	hypothetical protein TanjilG_26843 [Lupinus angustifolius]
TRINITY_DN101762_c0_g1			D:Cell cycle control, cell division, chromosome partitioning;K:Transcription;L:Replication, recombination and repair	hypothetical protein TanjilG_13364 [Lupinus angustifolius]
TRINITY_DN10177_c0_g1	CC:integral component of membrane;CC:membrane;BP:Golgi vesicle transport		S:Function unknown	PREDICTED: uncharacterized protein LOC109362435 isoform X1 [Lupinus angustifolius]	PF09177	Syntaxin 6, N-terminal
TRINITY_DN10177_c0_g2	CC:integral component of membrane;CC:membrane;BP:Golgi vesicle transport		S:Function unknown	hypothetical protein TanjilG_13439 [Lupinus angustifolius]	PF09177	Syntaxin 6, N-terminal
TRINITY_DN101782_c0_g1				PREDICTED: BOI-related E3 ubiquitin-protein ligase 1-like [Lupinus angustifolius] >OIV93072.1 hypothetical protein TanjilG_20734 [Lupinus angustifolius]
TRINITY_DN101783_c0_g1	CC:nucleus;CC:chromatin;MF:DNA binding;MF:chromatin binding;CC:cohesin complex;BP:sister chromatid cohesion		D:Cell cycle control, cell division, chromosome partitioning	hypothetical protein TanjilG_10561 [Lupinus angustifolius]
TRINITY_DN10179_c0_g1	CC:integral component of membrane;BP:transmembrane transport		T:Signal transduction mechanisms	PREDICTED: SPX domain-containing membrane protein At4g22990-like isoform X1 [Lupinus angustifolius] >XP_019413720.1 PREDICTED: SPX domain-containing membrane protein At4g22990-like isoform X1 [Lupinus angustifolius] >XP_019413721.1 PREDICTED: SPX domain-containing membrane protein At4g22990-like isoform X1 [Lupinus angustifolius] >XP_019413722.1 PREDICTED: SPX domain-containing membrane protein A…	PF03105;PF00083;PF07690	SPX domain;Sugar ;Major Facilitator Superfamily
TRINITY_DN10179_c1_g1	CC:integral component of membrane;BP:transmembrane transport		T:Signal transduction mechanisms;P:Inorganic ion transport and metabolism	putative membrane protein At1g63010 family, partial [Cajanus cajan]	PF03105	SPX domain
TRINITY_DN101796_c0_g1	CC:ribosome;CC:cytosolic large ribosomal subunit;CC:integral component of membrane;BP:ribosome biogenesis;MF:structural constituent of ribosome;BP:translation	Ribosome	J:Translation, ribosomal structure and biogenesis	60S ribosomal protein L34 [Populus trichocarpa] >XP_011042995.1 PREDICTED: 60S ribosomal protein L34 [Populus euphratica] >ABK92764.1 unknown [Populus trichocarpa] >PNT10553.1 hypothetical protein POPTR_012G108400 [Populus trichocarpa] >PNT10554.1 hypothetical protein POPTR_012G108400 [Populus trichocarpa]
TRINITY_DN1018_c0_g1	MF:potassium ion antiporter activity;CC:integral component of membrane;CC:plant-type vacuole membrane;BP:regulation of stomatal closure;CC:plasma membrane;BP:transmembrane transport		G:Carbohydrate transport and metabolism	PREDICTED: protein ZINC INDUCED FACILITATOR-LIKE 1-like isoform X9 [Lupinus angustifolius]	PF07690	Major Facilitator Superfamily
TRINITY_DN1018_c0_g2	CC:integral component of membrane;BP:transmembrane transport		G:Carbohydrate transport and metabolism	hypothetical protein TanjilG_23925 [Lupinus angustifolius]	PF07690;PF00083;PF12832;PF06609;PF13347	Major Facilitator Superfamily;Sugar ;MFS_1 like family;Fungal trichothecene efflux pump ;MFS/sugar transport protein
TRINITY_DN1018_c1_g1	CC:integral component of membrane;BP:transmembrane transport		G:Carbohydrate transport and metabolism	hypothetical protein TanjilG_22723 [Lupinus angustifolius]	PF07690;PF00083;PF12832;PF06609	Major Facilitator Superfamily;Sugar ;MFS_1 like family;Fungal trichothecene efflux pump
TRINITY_DN1018_c2_g1	CC:integral component of membrane;BP:transmembrane transport		G:Carbohydrate transport and metabolism	PREDICTED: protein ZINC INDUCED FACILITATOR-LIKE 1-like [Lupinus angustifolius]	PF07690;PF00083;PF06609;PF12832;PF13347;PF06779	Major Facilitator Superfamily;Sugar ;Fungal trichothecene efflux pump ;MFS_1 like family;MFS/sugar transport protein;Uncharacterised MFS-type transporter YbfB
TRINITY_DN10180_c0_g1	MF:methyltransferase activity		S:Function unknown	transducin/WD-like repeat-protein [Medicago truncatula]	PF00400	WD domain, G-beta repeat
TRINITY_DN101802_c0_g1	MF:oxidoreductase activity		S:Function unknown	PREDICTED: fruit protein pKIWI502-like [Lupinus angustifolius]
TRINITY_DN101806_c0_g1	MF:structural constituent of ribosome;BP:translation;CC:ribosome	Ribosome	C:Energy production and conversion	PREDICTED: 60S ribosomal protein L3 [Eucalyptus grandis] >XP_010030178.1 PREDICTED: 60S ribosomal protein L3 [Eucalyptus grandis] >KCW57121.1 hypothetical protein EUGRSUZ_I02767 [Eucalyptus grandis]	PF00297	Ribosomal protein L3
TRINITY_DN101806_c0_g3	CC:cytosolic small ribosomal subunit;MF:structural constituent of ribosome;BP:maturation of SSU-rRNA from tricistronic rRNA transcript ;MF:RNA binding;BP:translation;CC:ribosome	Ribosome	C:Energy production and conversion	PREDICTED: 40S ribosomal protein S16 [Juglans regia]	PF00380	Ribosomal protein S9/S16
TRINITY_DN101806_c0_g5	CC:proton-transporting ATP synthase complex, catalytic core F;BP:ATP synthesis coupled proton transport;CC:mitochondrion;MF:ATP binding;MF:proton-transporting ATP synthase activity, rotational mechanism	Oxidative phosphorylation	C:Energy production and conversion	uncharacterized protein LOC101255871 [Solanum lycopersicum]	PF00006;PF00306;PF02874	ATP synthase alpha/beta family, nucleotide-binding domain;ATP synthase alpha/beta chain, C terminal domain;ATP synthase alpha/beta family, beta-barrel domain
TRINITY_DN101809_c0_g1	MF:hydrolase activity;MF:transferase activity;MF:RNA binding;MF:transferase activity, transferring glycosyl groups;MF:RNA-directed DNA polymerase activity;MF:ubiquitin-protein transferase activity			hypothetical protein Ahy_A01g004628 [Arachis hypogaea]
TRINITY_DN10181_c0_g1	MF:transmembrane receptor protein serine/threonine kinase activity;MF:protein serine/threonine kinase activity;BP:protein phosphorylation;MF:ATP binding;CC:plasma membrane		T:Signal transduction mechanisms	hypothetical protein TanjilG_11919 [Lupinus angustifolius]	PF07714;PF00069;PF17667	Protein tyrosine kinase;Protein kinase domain;Fungal protein kinase
TRINITY_DN10181_c0_g2	MF:DNA-directed DNA polymerase activity			Retrovirus-related Pol polyprotein LINE-1 [Cajanus cajan]
TRINITY_DN10181_c1_g1				uncharacterized protein LOC110426859 isoform X1 [Herrania umbratica]
TRINITY_DN101811_c0_g2	MF:structural constituent of ribosome;CC:ribosome;MF:RNA binding;CC:cytosolic large ribosomal subunit	Ribosome	K:Transcription	60S ribosomal protein L31 [Cajanus cajan] >XP_020239995.1 60S ribosomal protein L31 [Cajanus cajan] >KYP41742.1 60S ribosomal protein L31 [Cajanus cajan] >KYP41749.1 60S ribosomal protein L31 [Cajanus cajan]	PF01248	Ribosomal protein L7Ae/L30e/S12e/Gadd45 family
TRINITY_DN101817_c0_g1				hypothetical protein TanjilG_00809 [Lupinus angustifolius]
TRINITY_DN10182_c0_g1	BP:negative regulation of transcription, DNA-templated		S:Function unknown	PREDICTED: programmed cell death protein 4-like [Lupinus angustifolius] >OIW18304.1 hypothetical protein TanjilG_31444 [Lupinus angustifolius]	PF02847	MA3 domain
TRINITY_DN10183_c0_g1	MF:histone-lysine N-methyltransferase activity;CC:nucleus;CC:chromosome;MF:zinc ion binding	Lysine degradation	S:Function unknown	PREDICTED: histone-lysine N-methyltransferase, H3 lysine-9 specific SUVH1-like [Lupinus angustifolius] >XP_019447113.1 PREDICTED: histone-lysine N-methyltransferase, H3 lysine-9 specific SUVH1-like [Lupinus angustifolius] >OIW09477.1 hypothetical protein TanjilG_23056 [Lupinus angustifolius]	PF02182;PF00856;PF05033	SAD/SRA domain;SET domain;Pre-SET motif
TRINITY_DN101837_c0_g1	CC:HOPS complex;BP:vesicle-mediated transport;BP:intracellular protein transport;CC:late endosome;BP:regulation of SNARE complex assembly;BP:vacuole fusion, non-autophagic		S:Function unknown	PREDICTED: vacuolar protein sorting-associated protein 41 homolog isoform X2 [Lupinus angustifolius]	PF00637	Region in Clathrin and VPS
TRINITY_DN10184_c0_g1	BP:response to jasmonic acid;BP:response to herbivore;CC:chloroplast stroma;MF:terpene synthase activity;MF:magnesium ion binding;BP:response to wounding;BP:defense response;MF:tricyclene synthase activity;MF:;BP:terpenoid biosynthetic process	Terpenoid backbone biosynthesis	O:Posttranslational modification, protein turnover, chaperones	PREDICTED: tricyclene synthase EBOS, chloroplastic-like isoform X2 [Lupinus angustifolius]
TRINITY_DN10184_c0_g2	BP:response to herbivore;CC:chloroplast stroma;MF:terpene synthase activity;MF:magnesium ion binding;BP:response to wounding;BP:defense response;MF:tricyclene synthase activity;MF:;BP:terpenoid biosynthetic process	Terpenoid backbone biosynthesis	O:Posttranslational modification, protein turnover, chaperones	PREDICTED: tricyclene synthase EBOS, chloroplastic-like isoform X2 [Lupinus angustifolius]	PF01397	Terpene synthase, N-terminal domain
TRINITY_DN101840_c0_g1	CC:integral component of membrane;MF:metal ion binding			PREDICTED: RING finger and transmembrane domain-containing protein 1-like [Lupinus angustifolius] >OIW04336.1 hypothetical protein TanjilG_32528 [Lupinus angustifolius]
TRINITY_DN101840_c0_g2	CC:integral component of membrane;MF:metal ion binding			PREDICTED: RING finger and transmembrane domain-containing protein 1-like isoform X1 [Lupinus angustifolius] >XP_019460922.1 PREDICTED: RING finger and transmembrane domain-containing protein 1-like isoform X1 [Lupinus angustifolius] >XP_019460923.1 PREDICTED: RING finger and transmembrane domain-containing protein 1-like isoform X2 [Lupinus angustifolius] >OIW02524.1 hypothetical protein TanjilG…
TRINITY_DN101840_c0_g3	CC:integral component of membrane;MF:metal ion binding			PREDICTED: RING finger and transmembrane domain-containing protein 1-like isoform X1 [Lupinus angustifolius] >XP_019460922.1 PREDICTED: RING finger and transmembrane domain-containing protein 1-like isoform X1 [Lupinus angustifolius] >XP_019460923.1 PREDICTED: RING finger and transmembrane domain-containing protein 1-like isoform X2 [Lupinus angustifolius] >OIW02524.1 hypothetical protein TanjilG…
TRINITY_DN10185_c0_g1			Z:Cytoskeleton	PREDICTED: protein IQ-DOMAIN 1-like isoform X2 [Lupinus angustifolius]	PF00612	IQ calmodulin-binding motif
TRINITY_DN10186_c0_g1	MF:sequence-specific DNA binding;CC:nucleus;MF:lipid binding;BP:regulation of transcription, DNA-templated		K:Transcription	hypothetical protein TanjilG_30086 [Lupinus angustifolius]	PF01852;PF00046;PF05920	START domain;Homeodomain;Homeobox KN domain
TRINITY_DN10187_c0_g1	BP:DNA recombination;MF:DNA-dependent ATPase activity;BP:negative regulation of reciprocal meiotic recombination;BP:negative regulation of DNA recombination;MF:double-strand/single-strand DNA junction binding;BP:pyrimidine dimer repair;BP:postreplication repair;CC:nucleus;BP:mismatch repair;MF:mismatched DNA binding;CC:mismatch repair complex;CC:MutSalpha complex;CC:MutSbeta complex;CC:plasma mem…	Mismatch repair	L:Replication, recombination and repair	PREDICTED: DNA mismatch repair protein MSH2 [Lupinus angustifolius]
TRINITY_DN101876_c0_g1	BP:reciprocal meiotic recombination		S:Function unknown	PREDICTED: uncharacterized protein LOC109353605 [Lupinus angustifolius] >OIW06337.1 hypothetical protein TanjilG_14982 [Lupinus angustifolius]
TRINITY_DN10188_c0_g1	CC:integral component of membrane;CC:plasma membrane;MF:ATP binding;MF:protein kinase activity		K:Transcription	PREDICTED: probable LRR receptor-like serine/threonine-protein kinase IRK [Lupinus angustifolius] >OIV96876.1 hypothetical protein TanjilG_00458 [Lupinus angustifolius]	PF07714;PF00069;PF13855;PF12799;PF08263;PF14531	Protein tyrosine kinase;Protein kinase domain;Leucine rich repeat;Leucine Rich repeats ;Leucine rich repeat N-terminal domain;Kinase-like
TRINITY_DN101887_c0_g1	MF:structural constituent of ribosome;BP:translation;CC:ribosome	Ribosome	S:Function unknown	hypothetical protein AQUCO_03900005v1 [Aquilegia coerulea]	PF08069;PF00312	Ribosomal S13/S15 N-terminal domain;Ribosomal protein S15
TRINITY_DN10189_c0_g1	MF:S-adenosylmethionine-dependent methyltransferase activity;CC:cytosol;MF:O-methyltransferase activity;MF:nucleic acid binding;BP:aromatic compound biosynthetic process;MF:protein dimerization activity	Stilbenoid, diarylheptanoid and gingerol biosynthesis	S:Function unknown	hypothetical protein TanjilG_29203 [Lupinus angustifolius]	PF00891	O-methyltransferase domain
TRINITY_DN101898_c0_g1	BP:germ cell development;MF:RNA binding;MF:mRNA binding	Spliceosome	S:Function unknown	hypothetical protein PHAVU_005G176800g [Phaseolus vulgaris] >ESW22735.1 hypothetical protein PHAVU_005G176800g [Phaseolus vulgaris]	PF00076;PF11627;PF16367	RNA recognition motif. ;Nuclear factor hnRNPA1;RNA recognition motif
TRINITY_DN1019_c0_g1	CC:nucleus		S:Function unknown	PREDICTED: uncharacterized protein LOC109327971 isoform X1 [Lupinus angustifolius] >XP_019416724.1 PREDICTED: uncharacterized protein LOC109327971 isoform X1 [Lupinus angustifolius] >OIV96308.1 hypothetical protein TanjilG_09735 [Lupinus angustifolius]
TRINITY_DN10190_c0_g1	CC:integral component of membrane;BP:signal transduction;MF:ADP binding		S:Function unknown	PREDICTED: TMV resistance protein N [Lupinus angustifolius]	PF01582;PF00931;PF13855;PF12799;PF13676;PF13191	TIR domain;NB-ARC domain;Leucine rich repeat;Leucine Rich repeats ;TIR domain;AAA ATPase domain
TRINITY_DN10190_c3_g1				PREDICTED: TMV resistance protein N [Lupinus angustifolius]
TRINITY_DN101902_c0_g1	CC:cytoplasm;MF:telomeric DNA binding;BP:regulation of telomere maintenance via telomerase;MF:telomerase RNA binding;BP:telomere maintenance via telomerase;CC:telomerase holoenzyme complex	mRNA surveillance pathway	S:Function unknown	hypothetical protein TanjilG_26589 [Lupinus angustifolius]
TRINITY_DN10191_c0_g1	MF:3-isopropylmalate dehydratase activity;MF:hydro-lyase activity	C5-Branched dibasic acid metabolism;Valine, leucine and isoleucine biosynthesis	E:Amino acid transport and metabolism	PREDICTED: 3-isopropylmalate dehydratase small subunit 3-like [Lupinus angustifolius] >XP_019443389.1 PREDICTED: 3-isopropylmalate dehydratase small subunit 3-like [Lupinus angustifolius] >XP_019443390.1 PREDICTED: 3-isopropylmalate dehydratase small subunit 3-like [Lupinus angustifolius] >OIW11918.1 hypothetical protein TanjilG_18191 [Lupinus angustifolius]	PF00694	Aconitase C-terminal domain
TRINITY_DN101915_c0_g1		C5-Branched dibasic acid metabolism;Valine, leucine and isoleucine biosynthesis;Pantothenate and CoA biosynthesis;Butanoate metabolism		PREDICTED: acetolactate synthase 3, chloroplastic-like [Lupinus angustifolius] >OIW13683.1 hypothetical protein TanjilG_08025 [Lupinus angustifolius]
TRINITY_DN10192_c0_g1			B:Chromatin structure and dynamics	PREDICTED: SWI/SNF complex component SNF12 homolog [Lupinus angustifolius] >XP_019428096.1 PREDICTED: SWI/SNF complex component SNF12 homolog [Lupinus angustifolius] >OIV90107.1 hypothetical protein TanjilG_01561 [Lupinus angustifolius]
TRINITY_DN10193_c0_g1	CC:integral component of membrane		S:Function unknown	PREDICTED: xylogen-like protein 11 isoform X2 [Lupinus angustifolius]	PF14368;PF00234	Probable lipid transfer;Protease inhibitor/seed storage/LTP family
TRINITY_DN101936_c0_g1	BP:nucleus organization;CC:nucleus			Protein CROWDED NUCLEI 1 isoform B [Glycine soja]
TRINITY_DN101937_c0_g1	CC:integral component of membrane;MF:zinc ion binding			PREDICTED: uncharacterized protein LOC109357542 [Lupinus angustifolius] >OIW04758.1 hypothetical protein TanjilG_08641 [Lupinus angustifolius]
TRINITY_DN10194_c0_g1	MF:metal ion binding;MF:RNA binding;BP:RNA processing		S:Function unknown	hypothetical protein TanjilG_28216 [Lupinus angustifolius]
TRINITY_DN101944_c0_g1	MF:metal ion binding		D:Cell cycle control, cell division, chromosome partitioning;Z:Cytoskeleton	PREDICTED: uncharacterized protein LOC109330232 isoform X2 [Lupinus angustifolius] >OIV95703.1 hypothetical protein TanjilG_01497 [Lupinus angustifolius]	PF13540;PF00415	Regulator of chromosome condensation ;Regulator of chromosome condensation
TRINITY_DN10195_c0_g1	CC:integral component of membrane;BP:transmembrane transport;BP:carbohydrate transport		E:Amino acid transport and metabolism;G:Carbohydrate transport and metabolism	PREDICTED: UDP-galactose/UDP-glucose transporter 3 [Lupinus angustifolius]	PF08449;PF00892	UAA transporter family;EamA-like transporter family
TRINITY_DN10195_c0_g2	CC:integral component of membrane;BP:transmembrane transport;BP:carbohydrate transport		E:Amino acid transport and metabolism;G:Carbohydrate transport and metabolism	PREDICTED: UDP-galactose/UDP-glucose transporter 3-like [Lupinus angustifolius] >OIW20963.1 hypothetical protein TanjilG_26675 [Lupinus angustifolius]	PF08449;PF00892	UAA transporter family;EamA-like transporter family
TRINITY_DN101951_c0_g1				hypothetical protein MtrunA17_Chr1g0147621 [Medicago truncatula]
TRINITY_DN10196_c0_g1	CC:peroxisome;BP:fatty acid beta-oxidation;BP:phenylacetate catabolic process;MF:transferase activity, transferring acyl groups other than amino-acyl groups;MF:acetyl-CoA C-acyltransferase activity	Peroxisome;alpha-Linolenic acid metabolism;Valine, leucine and isoleucine degradation;Biosynthesis of unsaturated fatty acids;Fatty acid degradation	I:Lipid transport and metabolism	PREDICTED: 3-ketoacyl-CoA thiolase 2, peroxisomal-like [Lupinus angustifolius] >OIW21348.1 hypothetical protein TanjilG_32662 [Lupinus angustifolius]	PF00108;PF02803	Thiolase, N-terminal domain;Thiolase, C-terminal domain
TRINITY_DN101963_c0_g1	CC:cytoplasm;BP:protein folding;CC:cytosol;CC:chaperonin-containing T-complex;MF:unfolded protein binding;MF:ATP binding		S:Function unknown	T-complex protein 1 subunit gamma [Arabidopsis lyrata subsp. lyrata] >EFH50569.1 hypothetical protein ARALYDRAFT_489475 [Arabidopsis lyrata subsp. lyrata]	PF00118	TCP-1/cpn60 chaperonin family
TRINITY_DN10197_c0_g1	MF:transcription factor activity, sequence-specific DNA binding;MF:sequence-specific DNA binding;CC:nucleus		K:Transcription	PREDICTED: heat shock factor protein HSF8-like [Lupinus angustifolius]	PF00447;PF08647	HSF-type DNA-binding;BRE1 E3 ubiquitin ligase
TRINITY_DN101972_c0_g1	MF:coenzyme binding;CC:integral component of membrane;MF:UDP-glucose 4-epimerase activity;BP:galactose metabolic process	Amino sugar and nucleotide sugar metabolism		UDP-arabinose 4-epimerase 1-like [Abrus precatorius] >XP_027346053.1 UDP-arabinose 4-epimerase 1-like [Abrus precatorius] >XP_027346054.1 UDP-arabinose 4-epimerase 1-like [Abrus precatorius]
TRINITY_DN101972_c0_g2	BP:galactose metabolic process;CC:integral component of membrane;MF:UDP-glucose 4-epimerase activity	Amino sugar and nucleotide sugar metabolism	M:Cell wall/membrane/envelope biogenesis	PREDICTED: UDP-arabinose 4-epimerase 1 isoform X1 [Lupinus angustifolius] >OIW18078.1 hypothetical protein TanjilG_08548 [Lupinus angustifolius]	PF16363;PF01370;PF02719;PF00106;PF01073;PF04321	GDP-mannose 4,6 dehydratase;NAD dependent epimerase/dehydratase family;Polysaccharide biosynthesis protein;short chain dehydrogenase;3-beta hydroxysteroid dehydrogenase/isomerase family;RmlD substrate binding domain
TRINITY_DN101978_c0_g1	MF:structural constituent of ribosome;CC:ribosome;BP:translation;CC:cytosolic small ribosomal subunit	Ribosome	J:Translation, ribosomal structure and biogenesis	40S ribosomal protein S11 [Cinnamomum micranthum f. kanehirae]	PF16205;PF00366	Ribosomal_S17 N-terminal;Ribosomal protein S17
TRINITY_DN10198_c0_g1	MF:sequence-specific DNA binding;CC:nucleus;BP:glucosinolate metabolic process;MF:transcription regulatory region DNA binding		S:Function unknown;K:Transcription	PREDICTED: uncharacterized protein LOC109361965 [Lupinus angustifolius] >OIW00049.1 hypothetical protein TanjilG_26386 [Lupinus angustifolius]	PF13837;PF10545	Myb/SANT-like DNA-binding domain;Alcohol dehydrogenase transcription factor Myb/SANT-like
TRINITY_DN101982_c0_g1	CC:Golgi apparatus;BP:Golgi organization;CC:integral component of membrane;BP:ER to Golgi vesicle-mediated transport;CC:endoplasmic reticulum;CC:endoplasmic reticulum-Golgi intermediate compartment;BP:intracellular protein transport;CC:ER to Golgi transport vesicle		U:Intracellular trafficking, secretion, and vesicular transport	hypothetical protein TanjilG_04656 [Lupinus angustifolius]	PF01105	emp24/gp25L/p24 family/GOLD
TRINITY_DN101986_c0_g1	CC:nucleus;MF:DNA binding			conserved oligomeric Golgi complex subunit 1 isoform X4 [Abrus precatorius]
TRINITY_DN10199_c0_g1	BP:regulation of microtubule cytoskeleton organization;CC:microtubule minus-end;BP:cellulose microfibril organization;BP:anisotropic cell growth;CC:cortical microtubule;CC:Golgi apparatus;BP:pollen tube development;BP:regulation of root morphogenesis;MF:microtubule binding;BP:pollen wall assembly;BP:protein localization to cortical microtubule cytoskeleton;BP:cellulose biosynthetic process;BP:res…		S:Function unknown	PREDICTED: uncharacterized protein LOC109361325 [Lupinus angustifolius] >OIW17874.1 hypothetical protein TanjilG_14120 [Lupinus angustifolius]	PF13646;PF17741	HEAT repeats;Family of unknown function
TRINITY_DN101996_c0_g2	MF:carbohydrate derivative binding;MF:transaminase activity;BP:carbohydrate derivative metabolic process;CC:cytosol	Amino sugar and nucleotide sugar metabolism;Alanine, aspartate and glutamate metabolism	M:Cell wall/membrane/envelope biogenesis	glutathione hydrolase 3 isoform X3 [Abrus precatorius]	PF01380;PF13580	SIS domain;SIS domain
TRINITY_DN102_c0_g1	CC:integral component of membrane;MF:carboxypeptidase activity			hypothetical protein TanjilG_31327 [Lupinus angustifolius]
TRINITY_DN1020_c0_g1	MF:antioxidant activity;CC:cell;MF:peroxiredoxin activity;BP:cell redox homeostasis;MF:peroxidase activity;MF:oxidoreductase activity		O:Posttranslational modification, protein turnover, chaperones	PREDICTED: 2-Cys peroxiredoxin BAS1, chloroplastic-like [Lupinus angustifolius] >OIW11376.1 hypothetical protein TanjilG_19632 [Lupinus angustifolius]
TRINITY_DN10200_c0_g1	CC:nucleus;MF:metal ion binding;MF:ATP binding;MF:DNA binding		S:Function unknown	hypothetical protein TanjilG_25384 [Lupinus angustifolius]
TRINITY_DN10201_c0_g1	MF:metal ion binding;BP:metal ion transport		S:Function unknown	PREDICTED: heavy metal-associated isoprenylated plant protein 9-like isoform X1 [Lupinus angustifolius] >OIW04343.1 hypothetical protein TanjilG_32535 [Lupinus angustifolius]	PF00403	Heavy-metal-associated domain
TRINITY_DN102011_c0_g1	MF:galactinol-sucrose galactosyltransferase activity;BP:response to abscisic acid;MF:transferase activity, transferring glycosyl groups;BP:raffinose family oligosaccharide biosynthetic process;BP:response to water deprivation;BP:response to oxidative stress;CC:chloroplast	Galactose metabolism	S:Function unknown	putative raffinose synthase protein [Phaseolus vulgaris]	PF05691	Raffinose synthase or seed imbibition protein Sip1
TRINITY_DN102019_c0_g1	MF:transcription factor activity, sequence-specific DNA binding		K:Transcription	PREDICTED: bZIP transcription factor 16-like [Lupinus angustifolius] >OIV93795.1 hypothetical protein TanjilG_03758 [Lupinus angustifolius]	PF16596	Disordered region downstream of MFMR
TRINITY_DN10202_c0_g1	CC:proteasome complex;BP:proteasome assembly;MF:binding, bridging		S:Function unknown	PREDICTED: proteasome-associated protein ECM29 homolog [Lupinus angustifolius] >OIW02801.1 hypothetical protein TanjilG_29577 [Lupinus angustifolius]	PF13001	Proteasome stabiliser
TRINITY_DN102029_c0_g1	MF:microtubule binding;BP:microtubule-based movement;MF:microtubule motor activity;MF:ATP binding			hypothetical protein DEO72_LG1g2784 [Vigna unguiculata]
TRINITY_DN10203_c0_g2	BP:tetrahydrobiopterin biosynthetic process;BP:response to abscisic acid;MF:4-alpha-hydroxytetrahydrobiopterin dehydratase activity;CC:nucleus;CC:cell periphery;CC:chloroplast stroma;BP:response to salt stress;BP:chloroplast ribulose bisphosphate carboxylase complex assembly		S:Function unknown	PREDICTED: uncharacterized protein LOC109346039 [Lupinus angustifolius] >OIW13250.1 hypothetical protein TanjilG_14183 [Lupinus angustifolius]	PF01329	Pterin 4 alpha carbinolamine dehydratase
TRINITY_DN102031_c0_g1	CC:ribosome;CC:cytosolic large ribosomal subunit;MF:structural constituent of ribosome;BP:maturation of LSU-rRNA from tricistronic rRNA transcript ;BP:translation;MF:mRNA binding	Ribosome	S:Function unknown	L-ascorbate oxidase [Trifolium pratense] >PNY03747.1 L-ascorbate oxidase [Trifolium pratense]	PF00831	Ribosomal L29 protein
TRINITY_DN102032_c0_g1	MF:hydrolase activity;BP:lipid metabolic process		S:Function unknown;S:Function unknown	PREDICTED: phospholipase A1-Ibeta2, chloroplastic-like [Lupinus angustifolius] >OIW10852.1 hypothetical protein TanjilG_27798 [Lupinus angustifolius]
TRINITY_DN10204_c0_g2	MF:pseudouridylate synthase activity;CC:nucleus;BP:pseudouridine synthesis;MF:RNA binding;MF:pseudouridine synthase activity		S:Function unknown	PREDICTED: multisubstrate pseudouridine synthase 7 [Lupinus angustifolius]	PF01142	tRNA pseudouridine synthase D
TRINITY_DN10205_c0_g1	CC:cytoplasm;CC:nucleus;MF:MAP kinase activity;BP:intracellular signal transduction;BP:regulation of gene expression;MF:ATP binding		T:Signal transduction mechanisms	hypothetical protein TanjilG_19037 [Lupinus angustifolius]	PF00069	Protein kinase domain
TRINITY_DN10205_c0_g2	CC:cytoplasm;CC:nucleus;MF:MAP kinase activity;BP:intracellular signal transduction;BP:regulation of gene expression;MF:ATP binding	MAPK signaling pathway - plant	T:Signal transduction mechanisms	PREDICTED: mitogen-activated protein kinase 9-like [Lupinus angustifolius] >OIV93350.1 hypothetical protein TanjilG_08763 [Lupinus angustifolius]	PF00069	Protein kinase domain
TRINITY_DN102055_c0_g1	BP:drug transmembrane transport;MF:antiporter activity;CC:integral component of membrane;MF:xenobiotic transporter activity		S:Function unknown	PREDICTED: protein DETOXIFICATION 1-like [Lupinus angustifolius]
TRINITY_DN10206_c0_g1	CC:integral component of membrane		S:Function unknown	PREDICTED: uncharacterized protein LOC109342022 [Lupinus angustifolius] >OIV89009.1 hypothetical protein TanjilG_07633 [Lupinus angustifolius]
TRINITY_DN102064_c0_g1	CC:integral component of membrane;MF:ionotropic glutamate receptor activity			hypothetical protein MTR_5g024973 [Medicago truncatula]
TRINITY_DN10207_c0_g1	BP:mRNA cis splicing, via spliceosome	Spliceosome	A:RNA processing and modification	hypothetical protein TanjilG_24779 [Lupinus angustifolius]	PF01846;PF00397	FF domain;WW domain
TRINITY_DN10208_c0_g1			S:Function unknown	PREDICTED: protein MEMO1 [Lupinus angustifolius] >XP_019437763.1 PREDICTED: protein MEMO1 [Lupinus angustifolius] >OIW14992.1 hypothetical protein TanjilG_30711 [Lupinus angustifolius]	PF01875	Memo-like protein
TRINITY_DN102082_c0_g1	CC:integral component of membrane		S:Function unknown	PREDICTED: uncharacterized membrane protein At1g75140-like [Lupinus angustifolius] >OIW12045.1 hypothetical protein TanjilG_24443 [Lupinus angustifolius]
TRINITY_DN102088_c0_g1	CC:cytoplasm;MF:metal ion binding;MF:GTPase activator activity	Endocytosis	U:Intracellular trafficking, secretion, and vesicular transport;U:Intracellular trafficking, secretion, and vesicular transport	hypothetical protein TanjilG_16425 [Lupinus angustifolius]
TRINITY_DN10209_c0_g1	CC:membrane;BP:lipid catabolic process;MF:N-acylphosphatidylethanolamine-specific phospholipase D activity;MF:calcium ion binding;MF:phospholipase D activity;BP:phosphatidylcholine metabolic process	Ether lipid metabolism;Glycerophospholipid metabolism;Endocytosis	I:Lipid transport and metabolism	PREDICTED: phospholipase D delta-like [Lupinus angustifolius]	PF12357;PF00168;PF00614;PF13091	Phospholipase D C terminal;C2 domain;Phospholipase D Active site motif;PLD-like domain
TRINITY_DN1021_c0_g1	BP:intracellular signal transduction;MF:metal ion binding		S:Function unknown	PREDICTED: uncharacterized protein LOC109338032 isoform X3 [Lupinus angustifolius]
TRINITY_DN1021_c0_g2	BP:intracellular signal transduction;MF:metal ion binding		S:Function unknown	PREDICTED: uncharacterized protein LOC109338032 isoform X3 [Lupinus angustifolius]
TRINITY_DN10210_c0_g1	BP:Golgi vesicle budding;MF:hydrolase activity;MF:phospholipid-translocating ATPase activity;CC:integral component of membrane;MF:magnesium ion binding;CC:Golgi membrane;BP:phospholipid translocation;CC:plasma membrane;MF:ATP binding;CC:trans-Golgi network		U:Intracellular trafficking, secretion, and vesicular transport	hypothetical protein TanjilG_10063 [Lupinus angustifolius]	PF16209;PF00122	Phospholipid-translocating ATPase N-terminal;E1-E2 ATPase
TRINITY_DN102104_c0_g1				hypothetical protein TanjilG_06379 [Lupinus angustifolius]	PF01167	Tub family
TRINITY_DN102104_c0_g2			S:Function unknown	tubby-like F-box protein 8-like [Trifolium pratense]
TRINITY_DN10211_c0_g1	CC:nucleus;MF:DNA binding		K:Transcription	PREDICTED: WUSCHEL-related homeobox 13-like [Lupinus angustifolius] >OIW05488.1 hypothetical protein TanjilG_27618 [Lupinus angustifolius]	PF00046	Homeodomain
TRINITY_DN102112_c0_g1		Glycerophospholipid metabolism;Glycerolipid metabolism	S:Function unknown	hypothetical protein TanjilG_14654 [Lupinus angustifolius]	PF08235	LNS2
TRINITY_DN10212_c0_g1	MF:histone-lysine N-methyltransferase activity;CC:integral component of membrane;MF:RNA binding;MF:RNA-directed DNA polymerase activity;CC:chromosome;CC:nucleus;MF:zinc ion binding		S:Function unknown;S:Function unknown;S:Function unknown	PREDICTED: uncharacterized protein LOC109329191 [Lupinus angustifolius]	PF00078;PF13966	Reverse transcriptase ;zinc-binding in reverse transcriptase
TRINITY_DN10212_c0_g2				PREDICTED: VQ motif-containing protein 4-like [Lupinus angustifolius] >OIV96165.1 hypothetical protein TanjilG_13097 [Lupinus angustifolius]	PF05678	VQ motif
TRINITY_DN10213_c0_g1	MF:small protein activating enzyme activity;MF:ATP binding;MF:protein kinase activity		T:Signal transduction mechanisms	PREDICTED: focal adhesion kinase 1-like [Lupinus angustifolius] >OIW04384.1 hypothetical protein TanjilG_32576 [Lupinus angustifolius]	PF07714;PF00069	Protein tyrosine kinase;Protein kinase domain
TRINITY_DN102137_c0_g1	CC:integral component of membrane			hypothetical protein ZEAMMB73_Zm00001d020743 [Zea mays]
TRINITY_DN102139_c0_g1	BP:tRNA wobble adenosine to inosine editing;MF:tRNA-specific adenosine-34 deaminase activity;CC:tRNA-specific adenosine-34 deaminase complex;MF:tRNA-specific adenosine deaminase activity;MF:catalytic activity;CC:plasma membrane;CC:chloroplast		F:Nucleotide transport and metabolism;J:Translation, ribosomal structure and biogenesis	PREDICTED: tRNA	PF00383;PF14437	Cytidine and deoxycytidylate deaminase zinc-binding region;MafB19-like deaminase
TRINITY_DN10214_c0_g1	MF:heme binding;CC:integral component of membrane;BP:response to oxidative stress;CC:extracellular region;BP:hydrogen peroxide catabolic process;MF:metal ion binding;MF:peroxidase activity	Phenylpropanoid biosynthesis	G:Carbohydrate transport and metabolism	PREDICTED: peroxidase 10 isoform X2 [Lupinus angustifolius]	PF00141	Peroxidase
TRINITY_DN102141_c0_g1			S:Function unknown	PREDICTED: uncharacterized protein LOC109339424 [Lupinus angustifolius] >OIV89824.1 hypothetical protein TanjilG_29916 [Lupinus angustifolius]
TRINITY_DN102147_c0_g1			S:Function unknown	PREDICTED: plant UBX domain-containing protein 8-like isoform X1 [Lupinus angustifolius] >OIV94893.1 hypothetical protein TanjilG_22090 [Lupinus angustifolius]
TRINITY_DN102148_c0_g1	CC:integral component of membrane		S:Function unknown	hypothetical protein TanjilG_07406 [Lupinus angustifolius]
TRINITY_DN10215_c0_g1			S:Function unknown	PREDICTED: protein LURP-one-related 5-like [Lupinus angustifolius]	PF04525	LURP-one-related
TRINITY_DN102159_c0_g1			S:Function unknown	PREDICTED: uncharacterized protein LOC109359167 isoform X1 [Lupinus angustifolius] >OIW02841.1 hypothetical protein TanjilG_29617 [Lupinus angustifolius]
TRINITY_DN10216_c0_g1			S:Function unknown	PREDICTED: uncharacterized protein LOC109358918 [Lupinus angustifolius]	PF04720	PDDEXK-like family of unknown function
TRINITY_DN10217_c0_g1			S:Function unknown	PREDICTED: uncharacterized protein LOC109325197 [Lupinus angustifolius] >XP_019412941.1 PREDICTED: uncharacterized protein LOC109325197 [Lupinus angustifolius]
TRINITY_DN102176_c0_g1			S:Function unknown	PREDICTED: uncharacterized protein LOC109348595 [Lupinus angustifolius] >XP_019444633.1 PREDICTED: uncharacterized protein LOC109348595 [Lupinus angustifolius] >XP_019444634.1 PREDICTED: uncharacterized protein LOC109348595 [Lupinus angustifolius] >XP_019444635.1 PREDICTED: uncharacterized protein LOC109348595 [Lupinus angustifolius]
TRINITY_DN102177_c0_g1	MF:structural constituent of ribosome;CC:cytosolic large ribosomal subunit;BP:translation;CC:ribosome	Ribosome	S:Function unknown	PREDICTED: 60S ribosomal protein L21-2-like [Lupinus angustifolius] >OIV92352.1 hypothetical protein TanjilG_10562 [Lupinus angustifolius]	PF01157	Ribosomal protein L21e
TRINITY_DN10218_c0_g1	MF:ER retention sequence binding;CC:integral component of membrane;BP:protein retention in ER lumen;CC:endoplasmic reticulum		U:Intracellular trafficking, secretion, and vesicular transport	PREDICTED: putative ER lumen protein-retaining receptor C28H8.4 [Lupinus angustifolius]	PF00810	ER lumen protein retaining receptor
TRINITY_DN10218_c0_g2	BP:hyperosmotic salinity response;BP:intracellular protein transport;MF:GTPase activity;BP:regulation of vesicle-mediated transport;BP:Rab protein signal transduction;CC:plasma membrane;CC:vacuolar membrane;CC:endosome;MF:GTP binding			hypothetical protein TSUD_55470 [Trifolium subterraneum]
TRINITY_DN10218_c0_g3	MF:ER retention sequence binding;CC:integral component of membrane;BP:protein retention in ER lumen;CC:endoplasmic reticulum		U:Intracellular trafficking, secretion, and vesicular transport	F17F8.24 [Arabidopsis thaliana]
TRINITY_DN102185_c0_g1	MF:O-acyltransferase activity;CC:integral component of membrane;BP:lipid metabolic process	Glycerolipid metabolism	S:Function unknown	PREDICTED: phospholipid:diacylglycerol acyltransferase 1-like [Lupinus angustifolius] >OIW17120.1 hypothetical protein TanjilG_25407 [Lupinus angustifolius]
TRINITY_DN102187_c0_g2	MF:hydrolase activity;CC:integral component of membrane;MF:DNA-directed DNA polymerase activity;MF:transferase activity, transferring glycosyl groups;MF:protein kinase activity;MF:RNA-directed DNA polymerase activity;MF:ATP binding		S:Function unknown	Retrovirus-related Pol polyprotein LINE-1, partial [Cajanus cajan]
TRINITY_DN10219_c0_g1	MF:transcription factor activity, sequence-specific DNA binding		S:Function unknown	PREDICTED: uncharacterized protein LOC109337580 isoform X2 [Lupinus angustifolius]	PF00170	bZIP transcription factor
TRINITY_DN102190_c0_g1			S:Function unknown	Reticulocyte-binding protein a [Spatholobus suberectus]
TRINITY_DN102195_c0_g1	CC:integral component of membrane;MF:RNA binding			hypothetical protein TanjilG_00383 [Lupinus angustifolius]
TRINITY_DN102198_c0_g2	CC:cytoplasm;CC:integral component of membrane;CC:nucleoplasm;MF:DNA binding;BP:mitotic spindle assembly checkpoint;CC:kinetochore		S:Function unknown	Mitotic-spindle organizing protein 1B [Parasponia andersonii]
TRINITY_DN1022_c0_g1	BP:abscisic acid-activated signaling pathway;MF:signaling receptor activity;CC:cytosol;MF:ribonuclease activity;MF:cytokinin binding;BP:defense response;BP:RNA phosphodiester bond hydrolysis;MF:protein phosphatase inhibitor activity;MF:calcium ion binding;MF:melatonin binding;BP:response to biotic stimulus;MF:abscisic acid binding			RecName: Full=Protein LlR18B; AltName: Full=LlPR10.1B; AltName: Allergen=Lup l 4 >CAA56299.1 L1R18B [Lupinus luteus] >AAC12791.1 LlPR10.1B [Lupinus luteus]	PF00407	Pathogenesis-related protein Bet v I family
TRINITY_DN1022_c0_g2			S:Function unknown	PREDICTED: protein DEHYDRATION-INDUCED 19 homolog 4-like [Lupinus angustifolius] >OIV95913.1 hypothetical protein TanjilG_27017 [Lupinus angustifolius]	PF14571	Stress-induced protein Di19, C-terminal
TRINITY_DN1022_c1_g1	CC:integral component of membrane		S:Function unknown;S:Function unknown	uncharacterized protein LOC111017867 [Momordica charantia]
TRINITY_DN1022_c7_g1	BP:regulation of transcription, DNA-templated;CC:nucleus;MF:DNA binding		K:Transcription	PREDICTED: homeobox protein knotted-1-like 7 isoform X2 [Lupinus angustifolius] >OIV94368.1 hypothetical protein TanjilG_25430 [Lupinus angustifolius]	PF03791;PF03790	KNOX2 domain;KNOX1 domain
TRINITY_DN10220_c0_g1	MF:translation initiation factor activity		S:Function unknown	uncharacterized protein LOC109799781 [Cajanus cajan] >KYP65145.1 hypothetical protein KK1_011374 [Cajanus cajan]
TRINITY_DN102209_c0_g1
TRINITY_DN10221_c0_g1	CC:integral component of membrane;MF:dolichyl-diphosphooligosaccharide-protein glycotransferase activity;BP:protein glycosylation;CC:oligosaccharyltransferase complex	N-Glycan biosynthesis;Protein processing in endoplasmic reticulum	S:Function unknown	PREDICTED: dolichyl-diphosphooligosaccharide--protein glycosyltransferase subunit DAD1 [Lupinus angustifolius] >OIW10687.1 hypothetical protein TanjilG_16059 [Lupinus angustifolius]	PF02109	DAD family
TRINITY_DN10222_c0_g1	CC:SAGA complex;BP:RNA polymerase II transcriptional preinitiation complex assembly;BP:histone H3 acetylation;MF:TBP-class protein binding;CC:transcription factor TFIID complex;BP:DNA-templated transcription, initiation;MF:DNA binding;CC:SLIK ;MF:protein heterodimerization activity;MF:translation initiation factor activity	Basal transcription factors	K:Transcription	PREDICTED: transcription initiation factor TFIID subunit 12-like [Lupinus angustifolius] >XP_019417515.1 PREDICTED: transcription initiation factor TFIID subunit 12-like [Lupinus angustifolius] >OIV97031.1 hypothetical protein TanjilG_19578 [Lupinus angustifolius] >OIW22029.1 hypothetical protein TanjilG_30301 [Lupinus angustifolius]	PF03847;PF00125;PF00808	Transcription initiation factor TFIID subunit A;Core histone H2A/H2B/H3/H4;Histone-like transcription factor
TRINITY_DN10223_c0_g1	MF:transcription factor activity, sequence-specific DNA binding;BP:brassinosteroid mediated signaling pathway;BP:transcription, DNA-templated	Plant hormone signal transduction	K:Transcription	PREDICTED: protein BRASSINAZOLE-RESISTANT 1-like [Lupinus angustifolius] >OIV89785.1 hypothetical protein TanjilG_01110 [Lupinus angustifolius]
TRINITY_DN102232_c0_g1				hypothetical protein Ahy_A03g016681 isoform A [Arachis hypogaea]
TRINITY_DN10224_c0_g1	MF:transcription factor activity, sequence-specific DNA binding;MF:protein dimerization activity;CC:nucleus;BP:positive regulation of transcription from RNA polymerase II promoter;MF:RNA polymerase II regulatory region sequence-specific DNA binding		K:Transcription	PREDICTED: floral homeotic protein AGAMOUS-like isoform X1 [Lupinus angustifolius] >XP_019462647.1 PREDICTED: floral homeotic protein AGAMOUS-like isoform X1 [Lupinus angustifolius] >XP_019462648.1 PREDICTED: floral homeotic protein AGAMOUS-like isoform X1 [Lupinus angustifolius]	PF00319;PF01486	SRF-type transcription factor ;K-box region
TRINITY_DN102240_c0_g1	BP:DNA recombination;BP:DNA repair;CC:nucleus;BP:DNA replication;MF:DNA binding;MF:metal ion binding	Mismatch repair;Homologous recombination;Nucleotide excision repair;DNA replication	S:Function unknown	PREDICTED: replication protein A 70 kDa DNA-binding subunit B-like [Lupinus angustifolius] >OIW19664.1 hypothetical protein TanjilG_18474 [Lupinus angustifolius]	PF04057	Replication factor-A protein 1, N-terminal domain
TRINITY_DN102242_c0_g1	CC:retrotransposon nucleocapsid;BP:DNA integration;MF:nucleic acid binding			uncharacterized protein LOC113786188 [Cicer arietinum]	PF07727	Reverse transcriptase
TRINITY_DN10225_c0_g1	MF:1-phosphatidylinositol-4-phosphate 5-kinase activity;MF:phosphatidylinositol phosphate kinase activity;MF:ATP binding	Phosphatidylinositol signaling system;Endocytosis;Inositol phosphate metabolism	T:Signal transduction mechanisms	phosphatidylinositol 4-phosphate 5-kinase 1-like isoform X1 [Abrus precatorius]	PF01504	Phosphatidylinositol-4-phosphate 5-Kinase
TRINITY_DN10225_c0_g2	MF:1-phosphatidylinositol-4-phosphate 5-kinase activity;MF:phosphatidylinositol phosphate kinase activity;MF:ATP binding	Phosphatidylinositol signaling system;Endocytosis;Inositol phosphate metabolism	T:Signal transduction mechanisms	hypothetical protein TanjilG_09228 [Lupinus angustifolius]	PF01504	Phosphatidylinositol-4-phosphate 5-Kinase
TRINITY_DN10226_c0_g1	MF:Rho guanyl-nucleotide exchange factor activity		S:Function unknown	PREDICTED: rop guanine nucleotide exchange factor 12-like isoform X1 [Lupinus angustifolius] >OIW03812.1 hypothetical protein TanjilG_30088 [Lupinus angustifolius]	PF03759	PRONE
TRINITY_DN10226_c2_g1	MF:Rho guanyl-nucleotide exchange factor activity		S:Function unknown	PREDICTED: rop guanine nucleotide exchange factor 12-like isoform X1 [Lupinus angustifolius] >OIW03812.1 hypothetical protein TanjilG_30088 [Lupinus angustifolius]	PF03759	PRONE
TRINITY_DN102269_c0_g1	MF:nucleic acid binding		S:Function unknown	PREDICTED: uncharacterized protein LOC109358939 [Lupinus angustifolius] >OIW03534.1 hypothetical protein TanjilG_30954 [Lupinus angustifolius]
TRINITY_DN10227_c0_g1			S:Function unknown	PREDICTED: protein DEHYDRATION-INDUCED 19 homolog 3-like [Lupinus angustifolius] >OIV95083.1 hypothetical protein TanjilG_21473 [Lupinus angustifolius]	PF14571;PF05605	Stress-induced protein Di19, C-terminal;Drought induced 19 protein
TRINITY_DN102270_c0_g1				PREDICTED: uncharacterized protein LOC109350699 [Lupinus angustifolius] >OIW09255.1 hypothetical protein TanjilG_01226 [Lupinus angustifolius]
TRINITY_DN10228_c0_g1	MF:transcription factor activity, sequence-specific DNA binding;CC:nucleus;MF:DNA binding		K:Transcription	PREDICTED: AP2-like ethylene-responsive transcription factor At1g16060 [Lupinus angustifolius]	PF00847	AP2 domain
TRINITY_DN102283_c0_g1	MF:catalytic activity;CC:integral component of membrane;BP:DNA topological change;MF:RNA binding;MF:DNA binding;MF:RNA-directed DNA polymerase activity;BP:histidine biosynthetic process;MF:DNA topoisomerase type II ;MF:ATP binding		S:Function unknown;S:Function unknown	PREDICTED: uncharacterized protein LOC109341648 [Lupinus angustifolius]
TRINITY_DN10229_c0_g1	BP:regulation of transcription, DNA-templated		S:Function unknown	hypothetical protein TanjilG_01044 [Lupinus angustifolius]
TRINITY_DN10229_c0_g3	BP:regulation of transcription, DNA-templated		S:Function unknown	topless-related protein 3-like isoform X1 [Abrus precatorius] >XP_027351651.1 topless-related protein 3-like isoform X1 [Abrus precatorius] >XP_027351652.1 topless-related protein 3-like isoform X1 [Abrus precatorius]
TRINITY_DN102292_c0_g1	MF:metal ion binding;BP:metal ion transport			heavy metal-associated isoprenylated plant protein 33 [Vigna unguiculata]	PF00403	Heavy-metal-associated domain
TRINITY_DN1023_c0_g1	CC:integral component of membrane;BP:carbohydrate metabolic process;MF:raffinose alpha-galactosidase activity;MF:ATP binding;MF:protein kinase activity		T:Signal transduction mechanisms	PREDICTED: receptor-like protein kinase FERONIA [Lupinus angustifolius] >OIV98540.1 hypothetical protein TanjilG_12126 [Lupinus angustifolius]	PF07714;PF00069;PF12819;PF11721	Protein tyrosine kinase;Protein kinase domain;Malectin-like domain;Malectin domain
TRINITY_DN1023_c2_g1	CC:integral component of membrane;BP:carbohydrate metabolic process;MF:raffinose alpha-galactosidase activity;MF:ATP binding;MF:protein kinase activity		T:Signal transduction mechanisms	hypothetical protein TanjilG_12922 [Lupinus angustifolius]
TRINITY_DN1023_c2_g2	CC:integral component of membrane;BP:carbohydrate metabolic process;MF:raffinose alpha-galactosidase activity;MF:ATP binding;MF:protein kinase activity		T:Signal transduction mechanisms;S:Function unknown	PREDICTED: receptor-like protein kinase FERONIA [Lupinus angustifolius] >OIV98540.1 hypothetical protein TanjilG_12126 [Lupinus angustifolius]
TRINITY_DN102302_c0_g1				hypothetical protein TSUD_336290 [Trifolium subterraneum]
TRINITY_DN10231_c0_g1	CC:nuclear speck;BP:regulation of alternative mRNA splicing, via spliceosome;BP:mRNA cis splicing, via spliceosome;MF:zinc ion binding;MF:RNA binding;CC:nucleus;MF:mRNA binding	Spliceosome	S:Function unknown	hypothetical protein TanjilG_18705 [Lupinus angustifolius]
TRINITY_DN102310_c0_g1	CC:transcription factor TFIID complex;BP:transcription initiation from RNA polymerase II promoter;MF:translation initiation factor activity	Basal transcription factors	K:Transcription	transcription initiation factor TFIID subunit 7 [Arachis ipaensis] >XP_020990559.1 transcription initiation factor TFIID subunit 7 [Arachis duranensis] >XP_025632095.1 transcription initiation factor TFIID subunit 7 [Arachis hypogaea]
TRINITY_DN10232_c0_g1	MF:methyltransferase activity;CC:integral component of membrane		S:Function unknown	hypothetical protein TanjilG_18873 [Lupinus angustifolius]	PF03141	Putative S-adenosyl-L-methionine-dependent methyltransferase
TRINITY_DN102323_c0_g1	CC:integral component of membrane;MF:ATP binding;MF:protein kinase activity		U:Intracellular trafficking, secretion, and vesicular transport	hypothetical protein TanjilG_04877 [Lupinus angustifolius]
TRINITY_DN10233_c0_g1			S:Function unknown	PREDICTED: uncharacterized protein LOC109351686 isoform X1 [Lupinus angustifolius] >OIW08541.1 hypothetical protein TanjilG_03217 [Lupinus angustifolius]	PF04784;PF14389	Protein of unknown function, DUF547;Leucine-zipper of ternary complex factor MIP1
TRINITY_DN10233_c0_g2			S:Function unknown	PREDICTED: uncharacterized protein LOC109353523 [Lupinus angustifolius] >OIW05817.1 hypothetical protein TanjilG_23603 [Lupinus angustifolius]	PF04784	Protein of unknown function, DUF547
TRINITY_DN102334_c0_g1	MF:iron ion binding;MF:oxidoreductase activity, acting on paired donors, with incorporation or reduction of molecular oxygen;CC:integral component of membrane;MF:monooxygenase activity;MF:heme binding	Phenylpropanoid biosynthesis	K:Transcription	PREDICTED: cytochrome P450 84A1-like [Lupinus angustifolius] >OIV94825.1 hypothetical protein TanjilG_22022 [Lupinus angustifolius]
TRINITY_DN10234_c0_g1	MF:transcription factor activity, sequence-specific DNA binding;BP:phosphorelay signal transduction system;CC:nucleus;MF:DNA binding	Plant hormone signal transduction	K:Transcription	PREDICTED: two-component response regulator ARR12-like isoform X2 [Lupinus angustifolius]	PF00249;PF00072	Myb-like DNA-binding domain;Response regulator receiver domain
TRINITY_DN10235_c0_g1			S:Function unknown	PREDICTED: uncharacterized protein LOC109327305 isoform X2 [Lupinus angustifolius] >OIV96757.1 hypothetical protein TanjilG_11753 [Lupinus angustifolius]
TRINITY_DN102353_c0_g1	CC:integral component of membrane;MF:zinc ion binding;MF:nucleic acid binding;MF:serine-type peptidase activity		Z:Cytoskeleton	glycine-rich protein 2-like [Sesamum indicum]	PF00313	'Cold-shock' DNA-binding domain
TRINITY_DN102360_c0_g1	MF:NAD binding;CC:mitochondrion;BP:formate catabolic process;MF:oxidoreductase activity, acting on the CH-OH group of donors, NAD or NADP as acceptor;MF:formate dehydrogenase	Glyoxylate and dicarboxylate metabolism	S:Function unknown	PREDICTED: formate dehydrogenase 1, mitochondrial [Lupinus angustifolius] >XP_019433135.1 PREDICTED: formate dehydrogenase 1, mitochondrial [Lupinus angustifolius] >OIW21467.1 hypothetical protein TanjilG_04911 [Lupinus angustifolius]	PF02826	D-isomer specific 2-hydroxyacid dehydrogenase, NAD binding domain
TRINITY_DN102361_c0_g1	MF:microtubule binding;BP:microtubule-based movement;MF:ATP binding;MF:ATPase activity;CC:kinesin complex;CC:microtubule;BP:spindle assembly;MF:microtubule motor activity		Z:Cytoskeleton	PREDICTED: kinesin-like protein KIN-14C isoform X2 [Lupinus angustifolius] >OIV91606.1 hypothetical protein TanjilG_09018 [Lupinus angustifolius]
TRINITY_DN10237_c0_g1	CC:integral component of membrane		S:Function unknown;S:Function unknown	hypothetical protein TSUD_348440 [Trifolium subterraneum]	PF13962	Domain of unknown function
TRINITY_DN10238_c0_g1	CC:vacuole;BP:proteasome-mediated ubiquitin-dependent protein catabolic process;BP:protein catabolic process in the vacuole;BP:protein targeting to vacuole;CC:extrinsic component of membrane;CC:GID complex;BP:negative regulation of gluconeogenesis		U:Intracellular trafficking, secretion, and vesicular transport	glutamate decarboxylase-like [Nicotiana tabacum] >AAM48129.1 glutamate decarboxylase [Nicotiana tabacum]	PF09783	Vacuolar import and degradation protein
TRINITY_DN102384_c0_g1	MF:transferase activity		S:Function unknown	Glutathione synthetase, chloroplastic [Glycine soja]	PF14303	No apical meristem-associated C-terminal domain
TRINITY_DN102386_c0_g1	BP:telomere tethering at nuclear periphery;MF:structural constituent of nuclear pore;MF:nuclear localization sequence binding;CC:nuclear pore;CC:nuclear pore cytoplasmic filaments;BP:protein import into nucleus;BP:posttranscriptional tethering of RNA polymerase II gene DNA at nuclear periphery;MF:RNA binding;BP:RNA export from nucleus	RNA transport	U:Intracellular trafficking, secretion, and vesicular transport;U:Intracellular trafficking, secretion, and vesicular transport;U:Intracellular trafficking, secretion, and vesicular transport	PREDICTED: nuclear pore complex protein NUP98A-like [Lupinus angustifolius] >OIW13770.1 hypothetical protein TanjilG_31659 [Lupinus angustifolius]
TRINITY_DN10239_c0_g1	MF:DNA binding		S:Function unknown	PREDICTED: uncharacterized protein LOC109343117 isoform X1 [Lupinus angustifolius] >XP_019436809.1 PREDICTED: uncharacterized protein LOC109343117 isoform X1 [Lupinus angustifolius] >OIW15679.1 hypothetical protein TanjilG_09617 [Lupinus angustifolius]	PF02892	BED zinc finger
TRINITY_DN1024_c0_g1			S:Function unknown;S:Function unknown;S:Function unknown	PREDICTED: protein HUA2-LIKE 2-like [Lupinus angustifolius] >XP_019452661.1 PREDICTED: protein HUA2-LIKE 2-like [Lupinus angustifolius] >XP_019452662.1 PREDICTED: protein HUA2-LIKE 2-like [Lupinus angustifolius]	PF00855;PF12243	PWWP domain;CTD kinase subunit gamma CTK3
TRINITY_DN10240_c0_g1	MF:nucleic acid binding		S:Function unknown	PREDICTED: glycine-rich cell wall structural protein 1.0-like isoform X1 [Lupinus angustifolius] >OIV98646.1 hypothetical protein TanjilG_12769 [Lupinus angustifolius]	PF01918	Alba
TRINITY_DN10240_c2_g1
TRINITY_DN102402_c0_g1	CC:integral component of membrane;MF:RNA-DNA hybrid ribonuclease activity;MF:nucleic acid binding		S:Function unknown	hypothetical protein TSUD_95050 [Trifolium subterraneum]	PF13966	zinc-binding in reverse transcriptase
TRINITY_DN102407_c0_g1	CC:lysosome;BP:proteolysis involved in cellular protein catabolic process;MF:cysteine-type endopeptidase activity;MF:cysteine-type peptidase activity;CC:extracellular space		K:Transcription	unknown [Lotus japonicus]	PF00112;PF08246	Papain family cysteine protease;Cathepsin propeptide inhibitor domain
TRINITY_DN10241_c0_g1	CC:cytoplasm;MF:hydrolase activity;MF:tRNA-specific adenosine-34 deaminase activity;BP:tRNA wobble adenosine to inosine editing;CC:nucleus;CC:tRNA-specific adenosine-34 deaminase complex;MF:tRNA-specific adenosine deaminase activity;MF:zinc ion binding;BP:tRNA modification		F:Nucleotide transport and metabolism;J:Translation, ribosomal structure and biogenesis	PREDICTED: tRNA-specific adenosine deaminase 2 isoform X2 [Lupinus angustifolius]	PF00383;PF14437	Cytidine and deoxycytidylate deaminase zinc-binding region;MafB19-like deaminase
TRINITY_DN102414_c0_g1	CC:retrotransposon nucleocapsid;BP:DNA integration;MF:DNA-directed DNA polymerase activity;MF:zinc ion binding;MF:nucleic acid binding			PREDICTED: uncharacterized protein LOC109359910 [Lupinus angustifolius]
TRINITY_DN10242_c0_g1	MF:transferase activity, transferring glycosyl groups;BP:protein glycosylation;MF:glucuronosyl-N-acetylglucosaminyl-proteoglycan 4-alpha-N-acetylglucosaminyltransferase activity			PREDICTED: probable glycosyltransferase At3g07620 [Lupinus angustifolius] >XP_019446355.1 PREDICTED: probable glycosyltransferase At3g07620 [Lupinus angustifolius]	PF03016	Exostosin family
TRINITY_DN10243_c0_g1	CC:ribosome;CC:nucleolus;CC:ribonucleoprotein complex;MF:RNA binding;BP:ribosome biogenesis	Ribosome biogenesis in eukaryotes;Spliceosome	J:Translation, ribosomal structure and biogenesis	PREDICTED: NHP2-like protein 1 [Lupinus angustifolius]	PF01248;PF15608	Ribosomal protein L7Ae/L30e/S12e/Gadd45 family;PELOTA RNA binding domain
TRINITY_DN10243_c0_g2	CC:ribosome;CC:nucleolus;CC:ribonucleoprotein complex;MF:RNA binding;BP:ribosome biogenesis	Ribosome biogenesis in eukaryotes;Spliceosome	J:Translation, ribosomal structure and biogenesis	PREDICTED: NHP2-like protein 1 [Lupinus angustifolius]	PF01248;PF15608	Ribosomal protein L7Ae/L30e/S12e/Gadd45 family;PELOTA RNA binding domain
TRINITY_DN10243_c2_g1	CC:ribosome;CC:nucleolus;CC:ribonucleoprotein complex;BP:ribosome biogenesis;MF:cofactor binding;MF:RNA binding	Ribosome biogenesis in eukaryotes;Spliceosome	J:Translation, ribosomal structure and biogenesis	hypothetical protein TanjilG_24448 [Lupinus angustifolius]	PF01248	Ribosomal protein L7Ae/L30e/S12e/Gadd45 family
TRINITY_DN102445_c0_g1			S:Function unknown	PREDICTED: uncharacterized protein LOC109337694 [Lupinus angustifolius] >OIW20038.1 hypothetical protein TanjilG_31956 [Lupinus angustifolius]
TRINITY_DN10245_c0_g1	MF:ATPase activity, coupled to transmembrane movement of substances;MF:ATPase activity;CC:integral component of membrane;CC:integral component of plasma membrane;CC:plasma membrane;MF:ATP binding	ABC transporters	V:Defense mechanisms	hypothetical protein TanjilG_12075 [Lupinus angustifolius]	PF00005	ABC transporter
TRINITY_DN10246_c0_g1	CC:trans-Golgi network;BP:Golgi to vacuole transport;CC:endosome;CC:integral component of membrane;CC:membrane;BP:protein targeting to vacuole;BP:ubiquitin-dependent protein catabolic process;MF:calcium ion binding;MF:ubiquitin protein ligase activity;CC:Golgi transport complex		U:Intracellular trafficking, secretion, and vesicular transport	PREDICTED: vacuolar-sorting receptor 1-like [Lupinus angustifolius]	PF02225;PF12662;PF07645	PA domain;Complement Clr-like EGF-like;Calcium-binding EGF domain
TRINITY_DN102466_c0_g1	MF:oxidoreductase activity, acting on the aldehyde or oxo group of donors, NAD or NADP as acceptor	Glycine, serine and threonine metabolism	C:Energy production and conversion	hypothetical protein Ahy_B02g057503 [Arachis hypogaea]
TRINITY_DN10247_c0_g1	MF:methyltransferase activity;CC:integral component of membrane		S:Function unknown	PREDICTED: probable methyltransferase PMT11 [Lupinus angustifolius] >OIV95607.1 hypothetical protein TanjilG_23838 [Lupinus angustifolius]	PF03141;PF08241;PF13649;PF13489;PF13847;PF08242	Putative S-adenosyl-L-methionine-dependent methyltransferase;Methyltransferase domain;Methyltransferase domain;Methyltransferase domain;Methyltransferase domain;Methyltransferase domain
TRINITY_DN10247_c1_g1	MF:methyltransferase activity;CC:integral component of membrane		S:Function unknown	PREDICTED: probable methyltransferase PMT11 [Lupinus angustifolius]	PF03141	Putative S-adenosyl-L-methionine-dependent methyltransferase
TRINITY_DN10247_c1_g2	MF:methyltransferase activity;CC:integral component of membrane		S:Function unknown	hypothetical protein TanjilG_29476 [Lupinus angustifolius]	PF03141	Putative S-adenosyl-L-methionine-dependent methyltransferase
TRINITY_DN102472_c0_g1			S:Function unknown	PREDICTED: tetratricopeptide repeat protein 7A-like [Lupinus angustifolius] >OIW20863.1 hypothetical protein TanjilG_24941 [Lupinus angustifolius]
TRINITY_DN102476_c0_g1	CC:eukaryotic translation initiation factor 4F complex;MF:translation initiation factor activity;MF:mRNA binding	RNA transport	J:Translation, ribosomal structure and biogenesis	PREDICTED: eukaryotic translation initiation factor-like isoform X2 [Lupinus angustifolius]
TRINITY_DN10248_c0_g1	BP:protein methylation;BP:regulation of transcription, DNA-templated;CC:cytosol;MF:histone-arginine N-methyltransferase activity;BP:histone arginine methylation;MF:protein-arginine omega-N asymmetric methyltransferase activity;MF:methyltransferase activity;BP:peptidyl-arginine methylation, to asymmetrical-dimethyl arginine		K:Transcription	hypothetical protein TanjilG_13232 [Lupinus angustifolius]
TRINITY_DN10249_c0_g2	MF:ligase activity;MF:ubiquitin activating enzyme activity;BP:regulation of stomatal opening;MF:transferase activity, transferring acyl groups;MF:zinc ion binding	Ubiquitin mediated proteolysis	S:Function unknown	PREDICTED: E3 ubiquitin-protein ligase MIEL1 [Lupinus angustifolius] >OIW03070.1 hypothetical protein TanjilG_19350 [Lupinus angustifolius]	PF14599	Zinc-ribbon
TRINITY_DN1025_c0_g1	CC:cytosol;MF:metal ion binding;BP:protein initiator methionine removal;MF:metalloaminopeptidase activity		J:Translation, ribosomal structure and biogenesis	methionine aminopeptidase 1A-like [Prunus avium]	PF00557;PF15801;PF01753	Metallopeptidase family M24;zf-MYND-like zinc finger, mRNA-binding;MYND finger
TRINITY_DN10250_c0_g1	MF:serine-type endopeptidase activity;CC:integral component of membrane;BP:transmembrane transport		P:Inorganic ion transport and metabolism	PREDICTED: cation/calcium exchanger 4-like [Lupinus angustifolius] >OIW11803.1 hypothetical protein TanjilG_12079 [Lupinus angustifolius]
TRINITY_DN10251_c0_g1			S:Function unknown	PREDICTED: uncharacterized protein LOC109342941 [Lupinus angustifolius] >XP_019436571.1 PREDICTED: uncharacterized protein LOC109342941 [Lupinus angustifolius] >OIW15936.1 hypothetical protein TanjilG_04471 [Lupinus angustifolius]
TRINITY_DN102512_c0_g1	CC:Golgi apparatus;CC:trans-Golgi network;CC:integral component of membrane;CC:membrane;BP:protein localization to membrane;CC:endosome		S:Function unknown	PREDICTED: transmembrane 9 superfamily member 8 [Lupinus angustifolius] >OIV96455.1 hypothetical protein TanjilG_07847 [Lupinus angustifolius]
TRINITY_DN102517_c0_g1				hypothetical protein TanjilG_16286 [Lupinus angustifolius]
TRINITY_DN10253_c0_g1				PREDICTED: skin secretory protein xP2-like isoform X1 [Lupinus angustifolius] >OIV89799.1 hypothetical protein TanjilG_30548 [Lupinus angustifolius]
TRINITY_DN10254_c0_g1	BP:defense response to fungus		S:Function unknown	hypothetical protein TanjilG_06911, partial [Lupinus angustifolius]	PF03735	ENT domain
TRINITY_DN102543_c0_g1	CC:cytoplasm;MF:telomeric DNA binding;BP:regulation of telomere maintenance via telomerase;MF:telomerase RNA binding;BP:telomere maintenance via telomerase;CC:telomerase holoenzyme complex	mRNA surveillance pathway	S:Function unknown	hypothetical protein TanjilG_26589 [Lupinus angustifolius]
TRINITY_DN10255_c1_g1	CC:cytoplasm;CC:polysome;CC:exon-exon junction complex;BP:nuclear-transcribed mRNA catabolic process, nonsense-mediated decay;MF:RNA binding	RNA transport;mRNA surveillance pathway	S:Function unknown	hypothetical protein GW17_00005123 [Ensete ventricosum] >RWW83051.1 hypothetical protein BHE74_00008455 [Ensete ventricosum] >RZR93485.1 hypothetical protein BHM03_00022000 [Ensete ventricosum]	PF02854	MIF4G domain
TRINITY_DN10255_c1_g2	CC:integral component of membrane		O:Posttranslational modification, protein turnover, chaperones	PREDICTED: RING-H2 finger protein ATL32-like [Lupinus angustifolius] >OIV90578.1 hypothetical protein TanjilG_01659 [Lupinus angustifolius]	PF13639;PF12678;PF13923;PF17123;PF14634;PF00097;PF13445;PF12861;PF13920	Ring finger domain;RING-H2 zinc finger domain;Zinc finger, C3HC4 type ;RING-like zinc finger;zinc-RING finger domain;Zinc finger, C3HC4 type ;RING-type zinc-finger;Anaphase-promoting complex subunit 11 RING-H2 finger;Zinc finger, C3HC4 type
TRINITY_DN102562_c0_g1	BP:cell cycle arrest;MF:cyclin-dependent protein serine/threonine kinase inhibitor activity;CC:nucleus;MF:kinase activity		T:Signal transduction mechanisms	PREDICTED: cyclin-dependent kinase inhibitor 7-like [Lupinus angustifolius] >OIW10178.1 hypothetical protein TanjilG_27929 [Lupinus angustifolius]	PF02234	Cyclin-dependent kinase inhibitor
TRINITY_DN10257_c0_g1	BP:chloroplast accumulation movement;CC:cytosol;BP:chloroplast avoidance movement		S:Function unknown	PREDICTED: WEB family protein At2g38370-like [Lupinus angustifolius]	PF05701	Weak chloroplast movement under blue light
TRINITY_DN102570_c0_g1	MF:cysteine-type endopeptidase activity;BP:ubiquitin-dependent protein catabolic process;BP:protein deubiquitination;MF:thiol-dependent ubiquitin-specific protease activity		O:Posttranslational modification, protein turnover, chaperones	PREDICTED: ubiquitin carboxyl-terminal hydrolase 26-like isoform X2 [Lupinus angustifolius] >OIV96521.1 hypothetical protein TanjilG_07913 [Lupinus angustifolius]	PF00443	Ubiquitin carboxyl-terminal hydrolase
TRINITY_DN10258_c0_g1	CC:proteasome complex;CC:nucleolus;CC:integral component of membrane;MF:protein kinase activity;BP:oxidation-reduction process;MF:tetrahydrofolylpolyglutamate synthase activity;CC:transport vesicle membrane;MF:zinc ion binding;MF:nucleic acid binding;CC:plasma membrane;BP:protein transport;MF:DNA-directed RNA polymerase activity;BP:mRNA cleavage;MF:ATP binding;BP:transcription, DNA-templated	Pyrimidine metabolism;RNA polymerase;Purine metabolism	S:Function unknown;S:Function unknown;S:Function unknown;S:Function unknown	Retrovirus-related Pol polyprotein LINE-1, partial [Cajanus cajan]
TRINITY_DN10258_c0_g3	CC:nucleolus;CC:integral component of membrane;MF:zinc ion binding;MF:nucleic acid binding;MF:DNA-directed RNA polymerase activity;BP:mRNA cleavage;BP:transcription, DNA-templated	Pyrimidine metabolism;RNA polymerase;Purine metabolism	K:Transcription	PREDICTED: DNA-directed RNA polymerase I subunit RPA12 [Lupinus angustifolius] >OIV98024.1 hypothetical protein TanjilG_12255 [Lupinus angustifolius]	PF12773	Double zinc ribbon
TRINITY_DN10259_c0_g1	CC:integral component of membrane;MF:nucleoside transmembrane transporter activity;CC:plasma membrane		S:Function unknown	PREDICTED: equilibrative nucleotide transporter 8-like [Lupinus angustifolius] >XP_019440232.1 PREDICTED: equilibrative nucleotide transporter 8-like [Lupinus angustifolius]	PF01733	Nucleoside transporter
TRINITY_DN102591_c0_g1	BP:protein oligomerization;BP:protein maturation by iron-sulfur cluster transfer;MF:chaperone binding;MF:ATPase activator activity		S:Function unknown	PREDICTED: uncharacterized protein LOC109334869 isoform X1 [Lupinus angustifolius]
TRINITY_DN1026_c0_g1	MF:rRNA pseudouridine synthase activity;BP:pseudouridine synthesis;MF:RNA binding;MF:pseudouridine synthase activity		J:Translation, ribosomal structure and biogenesis	PREDICTED: RNA pseudouridine synthase 4, mitochondrial-like [Lupinus angustifolius] >XP_019444510.1 PREDICTED: RNA pseudouridine synthase 4, mitochondrial-like [Lupinus angustifolius]	PF00849	RNA pseudouridylate synthase
TRINITY_DN1026_c1_g1	CC:chloroplast envelope;BP:carbohydrate metabolic process;BP:response to cytokinin;BP:regulation of photorespiration;BP:regulation of fatty acid beta-oxidation;CC:peroxisome;BP:carboxylic acid metabolic process;CC:apoplast;CC:vacuole;BP:tricarboxylic acid cycle;MF:L-malate dehydrogenase activity;BP:malate metabolic process	Citrate cycle ;Cysteine and methionine metabolism;Pyruvate metabolism;Carbon fixation in photosynthetic organisms;Glyoxylate and dicarboxylate metabolism	C:Energy production and conversion	PREDICTED: malate dehydrogenase, glyoxysomal-like [Lupinus angustifolius]	PF02866;PF00056;PF01073	lactate/malate dehydrogenase, alpha/beta C-terminal domain;lactate/malate dehydrogenase, NAD binding domain;3-beta hydroxysteroid dehydrogenase/isomerase family
TRINITY_DN10260_c0_g1	MF:ATP binding;MF:protein kinase activity		S:Function unknown	hypothetical protein TanjilG_00335 [Lupinus angustifolius]	PF12819	Malectin-like domain
TRINITY_DN10260_c0_g2	CC:integral component of membrane;MF:ATP binding;MF:protein kinase activity		T:Signal transduction mechanisms	hypothetical protein TanjilG_00338 [Lupinus angustifolius]	PF12819	Malectin-like domain
TRINITY_DN10260_c1_g1	MF:ATP binding;MF:protein kinase activity			hypothetical protein TanjilG_00335 [Lupinus angustifolius]	PF12819	Malectin-like domain
TRINITY_DN10261_c0_g1	CC:integral component of membrane		P:Inorganic ion transport and metabolism	PREDICTED: chaperone protein dnaJ 13 [Lupinus angustifolius] >OIW10831.1 hypothetical protein TanjilG_27777 [Lupinus angustifolius]	PF11875	Domain of unknown function
TRINITY_DN10262_c0_g1	MF:ATPase activity, coupled to transmembrane movement of substances;MF:ATPase activity;CC:integral component of membrane;CC:integral component of plasma membrane;CC:plasma membrane;MF:ATP binding	ABC transporters	V:Defense mechanisms	PREDICTED: ABC transporter B family member 6-like isoform X1 [Lupinus angustifolius] >OIV91227.1 hypothetical protein TanjilG_30449 [Lupinus angustifolius]
TRINITY_DN10263_c0_g1	MF:translation elongation factor activity;CC:mitochondrion		J:Translation, ribosomal structure and biogenesis	PREDICTED: microtubule-associated protein futsch [Lupinus angustifolius] >XP_019457842.1 PREDICTED: microtubule-associated protein futsch [Lupinus angustifolius] >XP_019457843.1 PREDICTED: microtubule-associated protein futsch [Lupinus angustifolius] >XP_019457844.1 PREDICTED: microtubule-associated protein futsch [Lupinus angustifolius] >OIW03695.1 hypothetical protein TanjilG_30759 [Lupinus ang…
TRINITY_DN102636_c0_g1	CC:chloroplast thylakoid membrane;MF:NADH dehydrogenase ;CC:integral component of membrane;CC:mitochondrion;CC:mitochondrial inner membrane;CC:respiratory chain;MF:quinone binding;BP:ATP synthesis coupled electron transport	Oxidative phosphorylation	E:Amino acid transport and metabolism	hypothetical protein OsI_37183 [Oryza sativa Indica Group]	PF00361;PF00662	Proton-conducting membrane transporter;NADH-Ubiquinone oxidoreductase
TRINITY_DN10264_c0_g1	MF:isomerase activity;MF:nutrient reservoir activity		S:Function unknown	PREDICTED: glutelin type-A 3-like [Lupinus angustifolius] >XP_019461841.1 PREDICTED: glutelin type-A 3-like [Lupinus angustifolius] >OIW17916.1 hypothetical protein TanjilG_30534 [Lupinus angustifolius]	PF00190;PF07883	Cupin;Cupin domain
TRINITY_DN10265_c0_g1	MF:microtubule binding;BP:microtubule cytoskeleton organization		S:Function unknown	PREDICTED: 65-kDa microtubule-associated protein 1-like [Lupinus angustifolius] >XP_019432932.1 PREDICTED: 65-kDa microtubule-associated protein 1-like [Lupinus angustifolius] >OIW21414.1 hypothetical protein TanjilG_02781 [Lupinus angustifolius] >OIW21415.1 hypothetical protein TanjilG_02782 [Lupinus angustifolius]	PF03999	Microtubule associated protein
TRINITY_DN102656_c0_g1	CC:integral component of membrane		S:Function unknown	PREDICTED: uncharacterized protein LOC109352990 [Lupinus angustifolius]
TRINITY_DN10266_c0_g1	BP:base-excision repair;MF:DNA-3-methyladenine glycosylase activity	Base excision repair	L:Replication, recombination and repair	PREDICTED: uncharacterized protein LOC109335420 [Lupinus angustifolius]	PF03352	Methyladenine glycosylase
TRINITY_DN102663_c0_g1	MF:heme binding;BP:response to oxidative stress;CC:extracellular region;BP:hydrogen peroxide catabolic process;MF:metal ion binding;MF:peroxidase activity	Phenylpropanoid biosynthesis	G:Carbohydrate transport and metabolism	PREDICTED: lignin-forming anionic peroxidase-like [Lupinus angustifolius]	PF00141	Peroxidase
TRINITY_DN102668_c0_g1	BP:cell wall modification;MF:pectinesterase activity;MF:aspartyl esterase activity	Pentose and glucuronate interconversions	S:Function unknown	PREDICTED: probable pectinesterase 66 [Lupinus angustifolius]	PF01095	Pectinesterase
TRINITY_DN10267_c0_g1	CC:integral component of membrane		D:Cell cycle control, cell division, chromosome partitioning;K:Transcription;T:Signal transduction mechanisms	hypothetical protein TanjilG_06647 [Lupinus angustifolius]	PF03381	LEM3
TRINITY_DN10267_c0_g2	CC:integral component of membrane		D:Cell cycle control, cell division, chromosome partitioning;K:Transcription;T:Signal transduction mechanisms	hypothetical protein TanjilG_29771 [Lupinus angustifolius]	PF03381	LEM3
TRINITY_DN102670_c0_g1	MF:methylmalonate-semialdehyde dehydrogenase ;CC:retrotransposon nucleocapsid;MF:DNA-directed DNA polymerase activity;BP:DNA integration;MF:zinc ion binding;MF:nucleic acid binding;MF:FAD binding;MF:oxidoreductase activity		L:Replication, recombination and repair;S:Function unknown	Retrovirus-related Pol polyprotein from transposon TNT 1-94 [Cajanus cajan]	PF07727	Reverse transcriptase
TRINITY_DN102676_c0_g1	MF:betaine-homocysteine S-methyltransferase activity;BP:methionine biosynthetic process;BP:S-methylmethionine cycle;MF:S-adenosylmethionine-homocysteine S-methyltransferase activity;MF:zinc ion binding	Cysteine and methionine metabolism	E:Amino acid transport and metabolism	PREDICTED: selenocysteine methyltransferase-like [Lupinus angustifolius]	PF02574	Homocysteine S-methyltransferase
TRINITY_DN102677_c0_g1	CC:cytoplasm;CC:nuclear speck;BP:regulation of alternative mRNA splicing, via spliceosome;BP:mRNA cis splicing, via spliceosome;MF:RNA binding;CC:nucleus;CC:integral component of membrane		S:Function unknown	hypothetical protein TSUD_21890 [Trifolium subterraneum]	PF00076	RNA recognition motif.
TRINITY_DN102689_c0_g1	MF:RNA-directed DNA polymerase activity;CC:integral component of membrane;MF:RNA binding			hypothetical protein TanjilG_07824 [Lupinus angustifolius]	PF00076	RNA recognition motif.
TRINITY_DN10269_c0_g1	MF:DNA binding		S:Function unknown	PREDICTED: uncharacterized protein LOC109335084 isoform X1 [Lupinus angustifolius] >OIV90760.1 hypothetical protein TanjilG_15493 [Lupinus angustifolius]
TRINITY_DN10269_c1_g1				hypothetical protein TanjilG_15495 [Lupinus angustifolius]
TRINITY_DN1027_c0_g2	CC:Golgi apparatus;BP:plant-type secondary cell wall biogenesis;BP:xylan biosynthetic process;MF:methyltransferase activity;MF:glucuronoxylan 4-O-methyltransferase activity;BP:xylan metabolic process		O:Posttranslational modification, protein turnover, chaperones	PREDICTED: glucuronoxylan 4-O-methyltransferase 2-like [Lupinus angustifolius] >OIW17474.1 hypothetical protein TanjilG_22586 [Lupinus angustifolius]	PF04669	Polysaccharide biosynthesis
TRINITY_DN10270_c0_g1	CC:cytoplasm;MF:coenzyme binding;BP:protein folding;BP:coenzyme A metabolic process;MF:unfolded protein binding;CC:endoplasmic reticulum membrane;BP:isoprenoid biosynthetic process;MF:hydroxymethylglutaryl-CoA reductase ;MF:ATP binding		O:Posttranslational modification, protein turnover, chaperones	PREDICTED: T-complex protein 1 subunit eta [Lupinus angustifolius] >XP_019461598.1 PREDICTED: T-complex protein 1 subunit eta [Lupinus angustifolius] >OIW02779.1 hypothetical protein TanjilG_29555 [Lupinus angustifolius]	PF00118	TCP-1/cpn60 chaperonin family
TRINITY_DN10270_c0_g2	CC:cytoplasm;BP:protein folding;CC:cytosol;MF:unfolded protein binding;BP:response to cadmium ion;MF:ATP binding		O:Posttranslational modification, protein turnover, chaperones	PREDICTED: T-complex protein 1 subunit eta-like [Lupinus angustifolius] >OIW16255.1 hypothetical protein TanjilG_18970 [Lupinus angustifolius]	PF00118	TCP-1/cpn60 chaperonin family
TRINITY_DN10271_c0_g1	CC:integral component of membrane		U:Intracellular trafficking, secretion, and vesicular transport	PREDICTED: HVA22-like protein e [Lupinus angustifolius] >XP_019457681.1 PREDICTED: HVA22-like protein e [Lupinus angustifolius] >XP_019457689.1 PREDICTED: HVA22-like protein e [Lupinus angustifolius] >XP_019457697.1 PREDICTED: HVA22-like protein e [Lupinus angustifolius] >XP_019457704.1 PREDICTED: HVA22-like protein e [Lupinus angustifolius] >OIW18281.1 hypothetical protein TanjilG_31421 [Lupinus…	PF03134	TB2/DP1, HVA22 family
TRINITY_DN102725_c0_g1	CC:integral component of membrane;BP:malate transport		J:Translation, ribosomal structure and biogenesis	hypothetical protein TanjilG_01334 [Lupinus angustifolius]	PF11744	Aluminium activated malate transporter
TRINITY_DN10273_c0_g1	CC:retrotransposon nucleocapsid;BP:DNA integration;MF:RNA-directed DNA polymerase activity;MF:zinc ion binding;MF:nucleic acid binding		S:Function unknown	hypothetical protein L195_g032143, partial [Trifolium pratense]
TRINITY_DN10273_c0_g2	CC:retrotransposon nucleocapsid;BP:DNA integration;MF:zinc ion binding;MF:nucleic acid binding		S:Function unknown	putative copia-type polyprotein [Trifolium pratense]	PF14223	gag-polypeptide of LTR copia-type
TRINITY_DN10273_c0_g3	CC:retrotransposon nucleocapsid;BP:DNA integration;MF:RNA-directed DNA polymerase activity;MF:zinc ion binding;MF:nucleic acid binding		S:Function unknown	hypothetical protein L195_g032016 [Trifolium pratense]
TRINITY_DN102733_c0_g1	MF:structural constituent of ribosome;CC:ribosome;CC:cytosolic large ribosomal subunit;BP:translation;BP:ribosomal large subunit assembly	Ribosome	J:Translation, ribosomal structure and biogenesis	uncharacterized protein LOC100527754 [Glycine max] >XP_028201312.1 60S ribosomal protein L23a-like [Glycine soja] >ACU16914.1 unknown [Glycine max] >KHN27205.1 60S ribosomal protein L23a [Glycine soja] >KRH70515.1 hypothetical protein GLYMA_02G095000 [Glycine max] >KRH70516.1 hypothetical protein GLYMA_02G095000 [Glycine max] >RZC24186.1 60S ribosomal protein L23a isoform A [Glycine soja] >RZC241…	PF00276;PF03939	Ribosomal protein L23;Ribosomal protein L23, N-terminal domain
TRINITY_DN10274_c0_g1	MF:ADP binding;MF:protein serine/threonine kinase activity;CC:retrotransposon nucleocapsid;MF:endonuclease activity;CC:integral component of membrane;MF:DNA-directed DNA polymerase activity;BP:DNA integration;MF:zinc ion binding;MF:nucleic acid binding;BP:transmembrane transport;MF:ATP binding;BP:signal transduction		S:Function unknown;S:Function unknown	copia LTR rider [Solanum lycopersicum] >ABO36636.1 copia LTR rider [Solanum lycopersicum]	PF07727;PF14223;PF00098	Reverse transcriptase ;gag-polypeptide of LTR copia-type;Zinc knuckle
TRINITY_DN10275_c0_g1	MF:Rho guanyl-nucleotide exchange factor activity		S:Function unknown	PREDICTED: rop guanine nucleotide exchange factor 5-like isoform X1 [Lupinus angustifolius] >OIW04078.1 hypothetical protein TanjilG_00638 [Lupinus angustifolius]	PF03759	PRONE
TRINITY_DN10276_c0_g1	MF:exopolyphosphatase activity		S:Function unknown	PREDICTED: uncharacterized protein LOC109336772 isoform X2 [Lupinus angustifolius]	PF02541	Ppx/GppA phosphatase family
TRINITY_DN10276_c1_g1	CC:cytoplasm;BP:intracellular protein transport;MF:ubiquitin binding;CC:cell		S:Function unknown	PREDICTED: target of Myb protein 1-like isoform X2 [Lupinus angustifolius] >XP_019444449.1 PREDICTED: target of Myb protein 1-like isoform X2 [Lupinus angustifolius] >XP_019444450.1 PREDICTED: target of Myb protein 1-like isoform X2 [Lupinus angustifolius] >XP_019444451.1 PREDICTED: target of Myb protein 1-like isoform X2 [Lupinus angustifolius] >OIW11261.1 hypothetical protein TanjilG_28352 [Lup…	PF00790;PF03127	VHS domain;GAT domain
TRINITY_DN102763_c0_g1	MF:RNA binding;MF:nucleic acid binding			hypothetical protein TanjilG_07824 [Lupinus angustifolius]	PF00076	RNA recognition motif.
TRINITY_DN102767_c0_g1	CC:proton-transporting V-type ATPase, V0 domain;CC:integral component of membrane;CC:vacuolar membrane;MF:hydrogen ion transmembrane transporter activity;BP:ATP hydrolysis coupled proton transport	Phagosome;Oxidative phosphorylation	J:Translation, ribosomal structure and biogenesis	PREDICTED: V-type proton ATPase subunit c1-like [Juglans regia]	PF00137	ATP synthase subunit C
TRINITY_DN102769_c0_g1	CC:mitochondrion	Oxidative phosphorylation	J:Translation, ribosomal structure and biogenesis	cytochrome C oxidase subunit I, partial	PF02297	Cytochrome oxidase c subunit VIb
TRINITY_DN10277_c0_g1	CC:integral component of membrane;CC:membrane;CC:plasma membrane		S:Function unknown	PREDICTED: CASP-like protein 5C1 [Lupinus angustifolius]	PF04535	Domain of unknown function
TRINITY_DN102771_c0_g1	MF:structural constituent of ribosome;BP:translation;CC:ribosome	Ribosome	S:Function unknown	40S ribosomal protein S13 [Jatropha curcas] >XP_012090408.1 40S ribosomal protein S13 [Jatropha curcas] >KDP22394.1 hypothetical protein JCGZ_26225 [Jatropha curcas] >KDP28764.1 hypothetical protein JCGZ_14535 [Jatropha curcas]	PF16205;PF00366	Ribosomal_S17 N-terminal;Ribosomal protein S17
TRINITY_DN10278_c0_g1	CC:cytoplasm;BP:DNA replication, Okazaki fragment processing;CC:integral component of membrane;MF:5'-flap endonuclease activity;MF:GTPase activator activity;MF:helicase activity;MF:single-stranded DNA-dependent ATPase activity;MF:RNA binding;MF:metal ion binding		S:Function unknown;S:Function unknown;S:Function unknown	ribonuclease H, partial [Trifolium pratense]	PF00078;PF13966	Reverse transcriptase ;zinc-binding in reverse transcriptase
TRINITY_DN10278_c0_g2	MF:transferase activity, transferring hexosyl groups		S:Function unknown	PREDICTED: UDP-glycosyltransferase 71K2-like [Lupinus angustifolius]	PF00201	UDP-glucoronosyl and UDP-glucosyl transferase
TRINITY_DN10279_c0_g1	CC:integral component of membrane		S:Function unknown	uncharacterized protein LOC100306553 [Glycine max] >XP_028189034.1 signaling peptide TAXIMIN 1-like [Glycine soja] >ACU14776.1 unknown [Glycine max] >KHN08456.1 hypothetical protein glysoja_014221 [Glycine soja] >KRH21310.1 hypothetical protein GLYMA_13G231900 [Glycine max] >RZB82450.1 hypothetical protein D0Y65_031551 [Glycine soja]
TRINITY_DN102794_c0_g1	CC:ribosome;CC:cytosolic large ribosomal subunit;MF:structural constituent of ribosome;MF:RNA binding;BP:cytoplasmic translation;BP:translation;BP:ribosomal large subunit assembly	Ribosome	T:Signal transduction mechanisms	60S Ribosomal protein [Parasponia andersonii]	PF01159	Ribosomal protein L6e
TRINITY_DN1028_c0_g1	CC:integral component of membrane;BP:malate transport		S:Function unknown	PREDICTED: MND1-interacting protein 1-like isoform X2 [Lupinus angustifolius]	PF13920;PF14447	Zinc finger, C3HC4 type ;Prokaryotic RING finger family 4
TRINITY_DN10280_c0_g1	CC:chloroplast thylakoid membrane;MF:chlorophyll binding;CC:photosystem I;CC:photosystem II;CC:integral component of membrane;BP:protein-chromophore linkage;MF:metal ion binding;BP:photosynthesis, light harvesting		S:Function unknown	PREDICTED: protein yippee-like isoform X1 [Lupinus angustifolius] >XP_019462137.1 PREDICTED: protein yippee-like isoform X1 [Lupinus angustifolius]	PF03226	Yippee zinc-binding/DNA-binding /Mis18, centromere assembly
TRINITY_DN10281_c0_g1	MF:S-adenosylmethionine-dependent methyltransferase activity;BP:methylation;MF:methyltransferase activity		S:Function unknown	salicylate carboxymethyltransferase-like [Arachis duranensis]	PF03492	SAM dependent carboxyl methyltransferase
TRINITY_DN10281_c0_g2	MF:metal ion binding	Peroxisome	O:Posttranslational modification, protein turnover, chaperones	PREDICTED: peroxisome biogenesis protein 2 [Lupinus angustifolius]	PF04757	Pex2 / Pex12 amino terminal region
TRINITY_DN10281_c0_g3	MF:metal ion binding	Peroxisome	O:Posttranslational modification, protein turnover, chaperones	peroxisome biogenesis protein 2 [Abrus precatorius]	PF04757	Pex2 / Pex12 amino terminal region
TRINITY_DN10281_c0_g4	BP:nuclear-transcribed mRNA catabolic process, nonsense-mediated decay		U:Intracellular trafficking, secretion, and vesicular transport	hypothetical protein Ahy_B08g094011 [Arachis hypogaea]
TRINITY_DN102813_c0_g1	MF:structural constituent of ribosome;MF:transcription factor activity, sequence-specific DNA binding;BP:translation;CC:ribosome	Ribosome	O:Posttranslational modification, protein turnover, chaperones	60S ribosomal protein L10-A-like [Quercus suber]	PF00252	Ribosomal protein L16p/L10e
TRINITY_DN102814_c0_g1	MF:structural constituent of ribosome;BP:translation;CC:ribosome	Ribosome	U:Intracellular trafficking, secretion, and vesicular transport	predicted protein [Hordeum vulgare subsp. vulgare]	PF01247	Ribosomal protein L35Ae
TRINITY_DN102816_c0_g1	BP:urea transport;BP:silicate transport;CC:integral component of membrane;CC:membrane;CC:Casparian strip;MF:channel activity;CC:plasma membrane;MF:silicate transmembrane transporter activity		J:Translation, ribosomal structure and biogenesis	aquaporin PIP1-4 [Glycine max] >ACU22115.1 unknown [Glycine max] >KRH27918.1 hypothetical protein GLYMA_11G023200 [Glycine max]	PF00230	Major intrinsic protein
TRINITY_DN10282_c0_g1	MF:DNA-directed DNA polymerase activity;MF:ADP binding;MF:protein serine/threonine kinase activity;CC:retrotransposon nucleocapsid;CC:integral component of membrane;CC:1,3-beta-D-glucan synthase complex;BP:;MF:1,3-beta-D-glucan synthase activity;BP:DNA integration;MF:zinc ion binding;MF:nucleic acid binding;MF:exonuclease activity;MF:ATP binding;BP:signal transduction		S:Function unknown;L:Replication, recombination and repair;S:Function unknown;S:Function unknown	copia LTR rider [Solanum lycopersicum] >ABO36636.1 copia LTR rider [Solanum lycopersicum]	PF00665;PF13976	Integrase core domain;GAG-pre-integrase domain
TRINITY_DN102830_c0_g1	MF:RNA-DNA hybrid ribonuclease activity;MF:nucleic acid binding			PREDICTED: uncharacterized protein LOC109332533 [Lupinus angustifolius]
TRINITY_DN102833_c0_g1	CC:nucleus		S:Function unknown	PREDICTED: probable mediator of RNA polymerase II transcription subunit 26c [Lupinus angustifolius] >OIW18183.1 hypothetical protein TanjilG_31303 [Lupinus angustifolius]	PF08711	TFIIS helical bundle-like domain
TRINITY_DN10284_c0_g1	MF:nucleic acid binding		S:Function unknown	PREDICTED: uncharacterized protein LOC109328844 isoform X2 [Lupinus angustifolius]
TRINITY_DN102847_c0_g1	MF:structural constituent of ribosome;CC:integral component of membrane;BP:translation;CC:ribosome	Ribosome	S:Function unknown	hypothetical protein M569_01958 [Genlisea aurea]	PF01655	Ribosomal protein L32
TRINITY_DN10285_c0_g1			S:Function unknown	PREDICTED: uncharacterized protein LOC109332896 [Lupinus angustifolius]	PF09713	Plant protein 1589 of unknown function
TRINITY_DN10286_c0_g1			L:Replication, recombination and repair	PREDICTED: F-box protein At2g35280-like [Lupinus angustifolius] >OIW19595.1 hypothetical protein TanjilG_18405 [Lupinus angustifolius]
TRINITY_DN10286_c0_g3	CC:ribosome;CC:nucleus;BP:regulation of DNA-templated transcription, elongation;MF:structural constituent of ribosome;BP:regulation of transcription from RNA polymerase II promoter;MF:translation elongation factor activity;BP:translation			hypothetical protein DVH24_030801 [Malus domestica]
TRINITY_DN102862_c0_g1			U:Intracellular trafficking, secretion, and vesicular transport	hypothetical protein KK1_016767 [Cajanus cajan]
TRINITY_DN10287_c0_g1	CC:chloroplast photosystem I;CC:photosystem I;BP:photosynthesis;MF:oxidoreductase activity	Photosynthesis	S:Function unknown	PREDICTED: photosystem I reaction center subunit N, chloroplastic-like [Lupinus angustifolius] >OIW17833.1 hypothetical protein TanjilG_02461 [Lupinus angustifolius]	PF05479	Photosystem I reaction centre subunit N
TRINITY_DN102878_c0_g1	CC:cytoplasm;BP:protein folding;CC:cytosol;MF:unfolded protein binding;BP:protein stabilization;CC:plasma membrane;CC:macromolecular complex;CC:perinuclear region of cytoplasm;CC:cell surface;BP:cellular response to heat;MF:ATP binding	Plant-pathogen interaction;Protein processing in endoplasmic reticulum	O:Posttranslational modification, protein turnover, chaperones	predicted protein [Hordeum vulgare subsp. vulgare]	PF00183	Hsp90 protein
TRINITY_DN10288_c0_g1	BP:nucleosome assembly;CC:nucleus		S:Function unknown	PREDICTED: NAP1-related protein 2-like [Lupinus angustifolius]	PF00956	Nucleosome assembly protein
TRINITY_DN102889_c0_g1	CC:nucleus;MF:DNA binding		K:Transcription	Myb-related protein like [Actinidia chinensis var. chinensis]	PF00249	Myb-like DNA-binding domain
TRINITY_DN10289_c0_g1	BP:phosphorelay signal transduction system;CC:nucleus	Circadian rhythm - plant	K:Transcription	PREDICTED: two-component response regulator-like PRR95 isoform X1 [Lupinus angustifolius]	PF00072;PF06203	Response regulator receiver domain;CCT motif
TRINITY_DN102891_c0_g1	MF:cytochrome-c oxidase activity;CC:integral component of membrane;BP:aerobic electron transport chain;CC:mitochondrion	Oxidative phosphorylation	O:Posttranslational modification, protein turnover, chaperones	cytochrome oxidase subunit 3	PF00510	Cytochrome c oxidase subunit III
TRINITY_DN1029_c0_g1	BP:response to auxin	Plant hormone signal transduction	S:Function unknown	hypothetical protein TanjilG_10793 [Lupinus angustifolius]	PF02519	Auxin responsive protein
TRINITY_DN1029_c0_g3	BP:response to auxin	Plant hormone signal transduction	S:Function unknown	hypothetical protein DVH24_022361 [Malus domestica]	PF02519	Auxin responsive protein
TRINITY_DN1029_c1_g1	BP:response to auxin	Plant hormone signal transduction	S:Function unknown	hypothetical protein DVH24_022612 [Malus domestica]	PF02519	Auxin responsive protein
TRINITY_DN10290_c0_g1	MF:single-stranded DNA 5'-3' exodeoxyribonuclease activity		S:Function unknown	PREDICTED: exonuclease V, chloroplastic-like isoform X1 [Lupinus angustifolius] >OIW12899.1 hypothetical protein TanjilG_15819 [Lupinus angustifolius]	PF09810	Exonuclease V - a 5' deoxyribonuclease
TRINITY_DN10290_c1_g1	CC:integral component of membrane;BP:chloroplast organization;BP:embryo development ending in seed dormancy;BP:thylakoid membrane organization;BP:regulation of chlorophyll metabolic process;CC:chloroplast			protein YELLOW LEAF 1, choloroplastic [Cajanus cajan] >KYP49787.1 hypothetical protein KK1_028472 [Cajanus cajan]
TRINITY_DN102901_c0_g1	MF:hydrolase activity;MF:ATPase activity;MF:ATP binding		S:Function unknown	ABC transporter B family member 1 [Cicer arietinum]	PF00004	ATPase family associated with various cellular activities
TRINITY_DN102909_c0_g1
TRINITY_DN10291_c0_g1	CC:peroxisome;BP:regulation of gene expression		S:Function unknown	PREDICTED: uncharacterized protein LOC109328441 isoform X1 [Lupinus angustifolius] >OIV96993.1 hypothetical protein TanjilG_26770 [Lupinus angustifolius]	PF01936;PF12872	NYN domain;OST-HTH/LOTUS domain
TRINITY_DN10291_c0_g2			S:Function unknown	PREDICTED: uncharacterized protein LOC109343478 isoform X4 [Lupinus angustifolius]
TRINITY_DN10291_c0_g3	CC:peroxisome;BP:regulation of gene expression		S:Function unknown	PREDICTED: uncharacterized protein LOC109328441 isoform X1 [Lupinus angustifolius] >OIV96993.1 hypothetical protein TanjilG_26770 [Lupinus angustifolius]	PF01936	NYN domain
TRINITY_DN10291_c1_g1	CC:peroxisome;BP:regulation of gene expression			PREDICTED: uncharacterized protein LOC109328441 isoform X1 [Lupinus angustifolius] >OIV96993.1 hypothetical protein TanjilG_26770 [Lupinus angustifolius]
TRINITY_DN10292_c0_g1	CC:nucleus;MF:DNA binding		K:Transcription	PREDICTED: protein PHOSPHATE STARVATION RESPONSE 1-like isoform X2 [Lupinus angustifolius] >OIW13215.1 hypothetical protein TanjilG_03544 [Lupinus angustifolius]	PF14379	MYB-CC type transfactor, LHEQLE motif
TRINITY_DN102925_c0_g1	MF:structural constituent of ribosome;BP:translation;CC:ribosome	Ribosome	S:Function unknown	60S ribosomal protein L27-3 [Apostasia shenzhenica]	PF01777;PF00467	Ribosomal L27e protein family;KOW motif
TRINITY_DN10293_c0_g1	MF:quinone binding;MF:copper ion binding;BP:amine metabolic process;MF:primary amine oxidase activity	Glycine, serine and threonine metabolism;Tropane, piperidine and pyridine alkaloid biosynthesis;Isoquinoline alkaloid biosynthesis;Phenylalanine metabolism;Tyrosine metabolism;beta-Alanine metabolism	Q:Secondary metabolites biosynthesis, transport and catabolism	PREDICTED: uncharacterized protein LOC109362517 [Lupinus angustifolius]	PF01179;PF02728;PF02727	Copper amine oxidase, enzyme domain;Copper amine oxidase, N3 domain;Copper amine oxidase, N2 domain
TRINITY_DN10294_c0_g1	CC:nucleus;BP:rRNA processing;MF:RNA binding		S:Function unknown	PREDICTED: pre-rRNA-processing protein esf1 [Lupinus angustifolius] >XP_019423549.1 PREDICTED: pre-rRNA-processing protein esf1 [Lupinus angustifolius] >OIV93563.1 hypothetical protein TanjilG_04795 [Lupinus angustifolius]	PF08159	NUC153 domain
TRINITY_DN10294_c2_g1	MF:zinc ion binding		S:Function unknown	PREDICTED: B-box domain protein 31-like [Lupinus angustifolius]	PF00643	B-box zinc finger
TRINITY_DN102949_c0_g1	MF:RNA-directed DNA polymerase activity;MF:RNA-DNA hybrid ribonuclease activity;MF:nucleic acid binding			PREDICTED: uncharacterized protein LOC109339940, partial [Lupinus angustifolius]	PF13456	Reverse transcriptase-like
TRINITY_DN10295_c0_g2	MF:transferase activity, transferring hexosyl groups			PREDICTED: UDP-glycosyltransferase 87A1-like [Lupinus angustifolius] >OIW16487.1 hypothetical protein TanjilG_32157 [Lupinus angustifolius]
TRINITY_DN10296_c0_g1	CC:cytoplasm;MF:GDP-D-glucose phosphorylase activity;BP:glucose metabolic process;MF:nucleotidyltransferase activity	Ascorbate and aldarate metabolism	S:Function unknown	PREDICTED: GDP-L-galactose phosphorylase 1 [Lupinus angustifolius] >OIW02881.1 hypothetical protein TanjilG_29657 [Lupinus angustifolius]	PF16269	Domain of unknown function
TRINITY_DN10296_c0_g2	MF:glutaminase activity;CC:chloroplast stroma;BP:glutamine metabolic process;MF:oxo-acid-lyase activity;MF:imidazoleglycerol-phosphate synthase activity;BP:histidine biosynthetic process;CC:chloroplast	Histidine metabolism	E:Amino acid transport and metabolism	PREDICTED: imidazole glycerol phosphate synthase hisHF, chloroplastic [Lupinus angustifolius]	PF00977;PF00117;PF01174;PF07685	Histidine biosynthesis protein;Glutamine amidotransferase class-I;SNO glutamine amidotransferase family;CobB/CobQ-like glutamine amidotransferase domain
TRINITY_DN10297_c0_g1			S:Function unknown	PREDICTED: uncharacterized protein LOC109330097 isoform X2 [Lupinus angustifolius]	PF14780	Domain of unknown function
TRINITY_DN102977_c0_g1	BP:metabolic process;MF:glucan endo-1,3-beta-glucanase activity, C-3 substituted reducing group;MF:glucan endo-1,3-beta-D-glucosidase activity		S:Function unknown	PREDICTED: probable endo-1,3	PF17652	Glycosyl hydrolase family 81 C-terminal domain
TRINITY_DN102978_c0_g1	CC:large ribosomal subunit;CC:ribosome;CC:cytosolic large ribosomal subunit;MF:structural constituent of ribosome;BP:negative regulation of translation;BP:translation;MF:mRNA binding	Ribosome	J:Translation, ribosomal structure and biogenesis	PREDICTED: 60S ribosomal protein L13a-like [Pyrus x bretschneideri]	PF00572	Ribosomal protein L13
TRINITY_DN102986_c0_g1	BP:regulation of transcription, DNA-templated;MF:metal ion binding;MF:RNA binding		S:Function unknown;S:Function unknown	hypothetical protein BVRB_025340, partial [Beta vulgaris subsp. vulgaris]	PF00076	RNA recognition motif.
TRINITY_DN103_c0_g1	MF:ATP-dependent peptidase activity;MF:metalloendopeptidase activity;CC:integral component of membrane;CC:mitochondrion;MF:zinc ion binding;BP:proteolysis;MF:ATP binding		O:Posttranslational modification, protein turnover, chaperones	PREDICTED: ATP-dependent zinc metalloprotease FTSH 9, chloroplastic-like [Lupinus angustifolius] >OIW16517.1 hypothetical protein TanjilG_32188 [Lupinus angustifolius]	PF00004;PF01434;PF17862;PF06480;PF07724;PF13191;PF07728;PF05496	ATPase family associated with various cellular activities ;Peptidase family M41;AAA+ lid domain;FtsH Extracellular;AAA domain ;AAA ATPase domain;AAA domain ;Holliday junction DNA helicase RuvB P-loop domain
TRINITY_DN103_c1_g1	CC:proton-transporting V-type ATPase, V0 domain;CC:integral component of membrane;MF:hydrogen ion transmembrane transporter activity;BP:transmembrane transport;BP:ATP hydrolysis coupled proton transport	Phagosome;Oxidative phosphorylation	C:Energy production and conversion	hypothetical protein VIGAN_06098900 [Vigna angularis var. angularis]
TRINITY_DN103_c1_g2	CC:proton-transporting V-type ATPase, V0 domain;CC:integral component of membrane;MF:hydrogen ion transmembrane transporter activity;BP:transmembrane transport;BP:ATP hydrolysis coupled proton transport	Phagosome;Oxidative phosphorylation		hypothetical protein TanjilG_07755 [Lupinus angustifolius]	PF05493	ATP synthase subunit H
TRINITY_DN1030_c0_g1	MF:flavin adenine dinucleotide binding;MF:3 iron, 4 sulfur cluster binding;MF:glutamate synthase ;BP:glutamate biosynthetic process;MF:FMN binding;MF:iron ion binding	Alanine, aspartate and glutamate metabolism;Nitrogen metabolism	E:Amino acid transport and metabolism	PREDICTED: glutamate synthase [NADH], amyloplastic isoform X1 [Cucumis sativus] >KGN58271.1 hypothetical protein Csa_3G603580 [Cucumis sativus]	PF01645	Conserved region in glutamate synthase
TRINITY_DN10300_c0_g1	BP:intracellular protein transport;CC:cell;CC:vacuolar membrane;MF:syntaxin binding;BP:SNARE complex disassembly;CC:SNARE complex;MF:soluble NSF attachment protein activity		U:Intracellular trafficking, secretion, and vesicular transport	PREDICTED: alpha-soluble NSF attachment protein-like [Lupinus angustifolius] >OIV98556.1 hypothetical protein TanjilG_12142 [Lupinus angustifolius]	PF14938;PF13424;PF13181	Soluble NSF attachment protein, SNAP;Tetratricopeptide repeat;Tetratricopeptide repeat
TRINITY_DN10301_c0_g1				PREDICTED: uncharacterized protein LOC109363169 [Lupinus angustifolius] >OIW17676.1 hypothetical protein TanjilG_29026 [Lupinus angustifolius]
TRINITY_DN103016_c0_g1	MF:structural constituent of ribosome;BP:translation;CC:small ribosomal subunit	Ribosome	S:Function unknown	predicted protein [Hordeum vulgare subsp. vulgare]	PF00164	Ribosomal protein S12/S23
TRINITY_DN10302_c0_g1	MF:antiporter activity;CC:integral component of membrane;MF:xenobiotic transporter activity		V:Defense mechanisms	PREDICTED: protein DETOXIFICATION 44, chloroplastic [Lupinus angustifolius] >XP_019461877.1 PREDICTED: protein DETOXIFICATION 44, chloroplastic [Lupinus angustifolius]	PF01554;PF14667	MatE;Polysaccharide biosynthesis C-terminal domain
TRINITY_DN10302_c0_g2				PREDICTED: protein DETOXIFICATION 44, chloroplastic [Lupinus angustifolius] >XP_019461877.1 PREDICTED: protein DETOXIFICATION 44, chloroplastic [Lupinus angustifolius]
TRINITY_DN10303_c0_g1	MF:hydrolase activity;CC:integral component of membrane;CC:ribosome	Ribosome	U:Intracellular trafficking, secretion, and vesicular transport	uncharacterized protein LOC107619295 isoform X2 [Arachis ipaensis] >RYQ89500.1 hypothetical protein Ahy_B09g096107 isoform A [Arachis hypogaea]	PF03297	S25 ribosomal protein
TRINITY_DN10304_c0_g1	BP:intracellular protein transport;CC:cell		O:Posttranslational modification, protein turnover, chaperones	MORC family CW-type zinc finger protein 4 [Spatholobus suberectus]
TRINITY_DN103046_c0_g1	BP:fatty acid biosynthetic process;BP:lipid metabolic process;MF:heme binding;MF:oxidoreductase activity, acting on paired donors, with oxidation of a pair of donors resulting in the reduction of molecular oxygen to two molecules of water;MF:metal ion binding;CC:integral component of membrane	Biosynthesis of unsaturated fatty acids	I:Lipid transport and metabolism	predicted protein [Hordeum vulgare subsp. vulgare]
TRINITY_DN103047_c0_g1	BP:phosphatidylethanolamine biosynthetic process;CC:endoplasmic reticulum;BP:phospholipid biosynthetic process;BP:protein autoprocessing;CC:membrane;MF:phosphatidylserine decarboxylase activity;MF:calcium ion binding	Glycerophospholipid metabolism	S:Function unknown	predicted protein [Hordeum vulgare subsp. vulgare]	PF02666	Phosphatidylserine decarboxylase
TRINITY_DN103049_c0_g1	BP:response to reactive oxygen species;BP:iron ion transport;CC:thylakoid;BP:photosynthesis;CC:chloroplast thylakoid membrane;CC:chloroplast envelope;MF:ferroxidase activity;CC:membrane;BP:intracellular sequestering of iron ion;CC:mitochondrion;MF:iron ion binding;BP:flower development;MF:identical protein binding;CC:cytoplasm;BP:cellular iron ion homeostasis;MF:ferrous iron binding;MF:ferric iro…		S:Function unknown	predicted protein [Hordeum vulgare subsp. vulgare]	PF00210	Ferritin-like domain
TRINITY_DN10305_c0_g1			S:Function unknown	PREDICTED: uncharacterized protein LOC109343010 [Lupinus angustifolius] >XP_019436657.1 PREDICTED: uncharacterized protein LOC109343010 [Lupinus angustifolius] >XP_019436658.1 PREDICTED: uncharacterized protein LOC109343010 [Lupinus angustifolius] >XP_019436659.1 PREDICTED: uncharacterized protein LOC109343010 [Lupinus angustifolius] >XP_019436660.1 PREDICTED: uncharacterized protein LOC109343010…	PF04398	Protein of unknown function, DUF538
TRINITY_DN10305_c0_g2			S:Function unknown	PREDICTED: uncharacterized protein LOC109358699 [Lupinus angustifolius] >XP_019458641.1 PREDICTED: uncharacterized protein LOC109358699 [Lupinus angustifolius] >XP_019458642.1 PREDICTED: uncharacterized protein LOC109358699 [Lupinus angustifolius] >OIW03662.1 hypothetical protein TanjilG_30726 [Lupinus angustifolius]	PF04398	Protein of unknown function, DUF538
TRINITY_DN103056_c0_g1	MF:ATP binding	Protein export;Protein processing in endoplasmic reticulum	O:Posttranslational modification, protein turnover, chaperones	predicted protein [Hordeum vulgare subsp. vulgare]	PF00012	Hsp70 protein
TRINITY_DN103058_c0_g1	MF:3alpha,7alpha,12alpha-trihydroxy-5beta-cholest-24-enoyl-CoA hydratase activity;BP:fatty acid biosynthetic process;MF:NAD binding;MF:3-oxoacyl-[acyl-carrier-protein] reductase ;MF:3-oxo-pimeloyl-[acp] methyl ester reductase activity;MF:3-oxo-glutaryl-[acp] methyl ester reductase activity;MF:oxidoreductase activity	Peroxisome;Biosynthesis of unsaturated fatty acids	S:Function unknown	peroxisomal hydratase-dehydrogenase-epimerase-like [Quercus suber]	PF00106;PF13561;PF08659	short chain dehydrogenase;Enoyl-;KR domain
TRINITY_DN10306_c0_g1	BP:cytidine to uridine editing		S:Function unknown	hypothetical protein TanjilG_08006 [Lupinus angustifolius]
TRINITY_DN103064_c0_g1	CC:cytoplasm;BP:ribosomal small subunit assembly;CC:small ribosomal subunit;MF:poly;CC:nucleus;CC:ribonucleoprotein complex;MF:structural constituent of ribosome;MF:RNA binding;CC:mitochondrial small ribosomal subunit;BP:translation;BP:mRNA export from nucleus		S:Function unknown;S:Function unknown	Heterogeneous nuclear ribonucleoprotein Q isoform A [Glycine soja] >RZC21526.1 Heterogeneous nuclear ribonucleoprotein Q isoform B [Glycine soja]	PF00076;PF11608	RNA recognition motif. ;Limkain b1
TRINITY_DN103066_c0_g1	CC:integral component of membrane			PREDICTED: leucine-rich repeat extensin-like protein 5 [Lupinus angustifolius]
TRINITY_DN10307_c0_g1	MF:protein dimerization activity	MAPK signaling pathway - plant;Plant hormone signal transduction	K:Transcription	PREDICTED: transcription factor bHLH14-like [Lupinus angustifolius] >OIW04575.1 hypothetical protein TanjilG_20931 [Lupinus angustifolius]	PF14215;PF00010	bHLH-MYC and R2R3-MYB transcription factors N-terminal;Helix-loop-helix DNA-binding domain
TRINITY_DN10308_c0_g1	CC:integral component of membrane;MF:protein histidine kinase activity		S:Function unknown	PREDICTED: PLASMODESMATA CALLOSE-BINDING PROTEIN 3-like isoform X1 [Lupinus angustifolius]	PF07983	X8 domain
TRINITY_DN103095_c0_g1	MF:glutamate-ammonia ligase activity;MF:ATP binding;BP:glutamine biosynthetic process	Glyoxylate and dicarboxylate metabolism;Arginine biosynthesis;Alanine, aspartate and glutamate metabolism;Nitrogen metabolism	L:Replication, recombination and repair	glutamine synthetase-like [Quercus suber]	PF00120;PF03951	Glutamine synthetase, catalytic domain;Glutamine synthetase, beta-Grasp domain
TRINITY_DN103098_c0_g1	CC:ribonucleoprotein complex;CC:mitochondrion;BP:mitochondrial mRNA modification;MF:O-methyltransferase activity;MF:RNA binding;MF:protein dimerization activity		S:Function unknown	hypothetical protein C2845_PM08G17590 [Panicum miliaceum]	PF00076;PF16367	RNA recognition motif. ;RNA recognition motif
TRINITY_DN1031_c0_g1	MF:transferase activity		J:Translation, ribosomal structure and biogenesis	unknown [Lotus japonicus]	PF13302;PF00583;PF13523;PF13420	Acetyltransferase ;Acetyltransferase ;Acetyltransferase ;Acetyltransferase
TRINITY_DN10310_c0_g1	CC:nucleus		S:Function unknown	PREDICTED: probable mediator of RNA polymerase II transcription subunit 26b isoform X1 [Lupinus angustifolius]	PF08711	TFIIS helical bundle-like domain
TRINITY_DN103104_c0_g1	BP:ribosomal large subunit biogenesis;CC:large ribosomal subunit;CC:cytosolic large ribosomal subunit;MF:structural constituent of ribosome;MF:RNA binding;BP:cytoplasmic translation;BP:translation	Ribosome	Z:Cytoskeleton	hypothetical protein DM860_007082 [Cuscuta australis]	PF16906;PF00467	Ribosomal proteins L26 eukaryotic, L24P archaeal;KOW motif
TRINITY_DN10311_c0_g1	BP:clathrin coat assembly;MF:clathrin binding;MF:1-phosphatidylinositol binding;CC:clathrin-coated vesicle		U:Intracellular trafficking, secretion, and vesicular transport	PREDICTED: putative clathrin assembly protein At2g01600 [Lupinus angustifolius] >OIW01964.1 hypothetical protein TanjilG_11538 [Lupinus angustifolius]	PF07651	ANTH domain
TRINITY_DN103110_c0_g1	CC:cytosol;CC:cell;MF:oxidoreductase activity, acting on a sulfur group of donors, disulfide as acceptor;CC:mitochondrion;CC:plasma membrane;BP:cell redox homeostasis;MF:protein disulfide oxidoreductase activity;BP:glycerol ether metabolic process		S:Function unknown	hypothetical protein GLYMA_10G038000 [Glycine max]	PF00085;PF13905;PF13899;PF14595	Thioredoxin;Thioredoxin-like;Thioredoxin-like;Thioredoxin
TRINITY_DN103117_c0_g1	MF:DNA-directed DNA polymerase activity;MF:catalytic activity		S:Function unknown	Retrovirus-related Pol polyprotein LINE-1 [Cajanus cajan]
TRINITY_DN10312_c0_g1	BP:positive regulation of ubiquitin protein ligase activity;MF:anaphase-promoting complex binding;MF:ubiquitin-protein transferase activator activity	Ubiquitin mediated proteolysis	D:Cell cycle control, cell division, chromosome partitioning;S:Function unknown	PREDICTED: protein FIZZY-RELATED 3-like [Lupinus angustifolius]	PF00400;PF12894;PF08662	WD domain, G-beta repeat;Anaphase-promoting complex subunit 4 WD40 domain;Eukaryotic translation initiation factor eIF2A
TRINITY_DN103121_c0_g1	MF:structural constituent of ribosome;BP:translation;CC:ribosome	Ribosome	L:Replication, recombination and repair	unknown [Lotus japonicus]	PF01282	Ribosomal protein S24e
TRINITY_DN103128_c0_g1	MF:hydrolase activity;MF:acylglycerol lipase activity;MF:catalytic activity		S:Function unknown;S:Function unknown	PREDICTED: monoacylglycerol lipase ABHD6-like [Lupinus angustifolius]	PF00561;PF12697;PF12146;PF08840;PF00756	alpha/beta hydrolase fold;Alpha/beta hydrolase family;Serine aminopeptidase, S33;BAAT / Acyl-CoA thioester hydrolase C terminal;Putative esterase
TRINITY_DN10313_c0_g1	BP:vesicle-mediated transport;BP:intracellular protein transport;MF:clathrin light chain binding;CC:clathrin complex;MF:structural molecule activity;CC:clathrin coat of trans-Golgi network vesicle;CC:clathrin coat of coated pit	Endocytosis	U:Intracellular trafficking, secretion, and vesicular transport	PREDICTED: clathrin heavy chain 1-like [Lupinus angustifolius]	PF00637	Region in Clathrin and VPS
TRINITY_DN10313_c0_g2	BP:vesicle-mediated transport;BP:intracellular protein transport;MF:clathrin light chain binding;CC:clathrin complex;MF:structural molecule activity;CC:clathrin coat of trans-Golgi network vesicle;CC:clathrin coat of coated pit	Endocytosis	U:Intracellular trafficking, secretion, and vesicular transport	Clathrin interactor EPSIN 1 isoform B [Glycine soja]
TRINITY_DN103131_c0_g1	CC:ribosome	Ribosome	J:Translation, ribosomal structure and biogenesis	40S ribosomal protein S11 [Brachypodium distachyon] >PNT61843.1 hypothetical protein BRADI_5g21630v3 [Brachypodium distachyon]	PF03501	Plectin/S10 domain
TRINITY_DN103137_c0_g1	MF:structural constituent of ribosome;BP:ribosomal small subunit assembly;BP:cytoplasmic translation;BP:translation;CC:cytosolic small ribosomal subunit	Ribosome	Z:Cytoskeleton	predicted protein [Hordeum vulgare subsp. vulgare]	PF00318;PF16122	Ribosomal protein S2;40S ribosomal protein SA C-terminus
TRINITY_DN103138_c0_g1	MF:DNA polymerase processivity factor activity;CC:cytoplasm;BP:regulation of cell cycle;BP:leading strand elongation;CC:nucleus;CC:nucleolus;BP:translesion synthesis;BP:mismatch repair;BP:regulation of DNA replication;BP:DNA replication;MF:DNA binding;CC:PCNA complex	Mismatch repair;Base excision repair;Nucleotide excision repair;DNA replication	L:Replication, recombination and repair	PREDICTED: proliferating cell nuclear antigen-like [Raphanus sativus]	PF00705;PF02747;PF02144;PF04005;PF04139	Proliferating cell nuclear antigen, N-terminal domain;Proliferating cell nuclear antigen, C-terminal domain;Repair protein Rad1/Rec1/Rad17;Hus1-like protein;Rad9
TRINITY_DN10314_c0_g1			S:Function unknown	PREDICTED: protein EXORDIUM-like 2 [Lupinus angustifolius] >OIV93117.1 hypothetical protein TanjilG_20779 [Lupinus angustifolius]	PF04674	Phosphate-induced protein 1 conserved region
TRINITY_DN10314_c0_g2			S:Function unknown	PREDICTED: protein EXORDIUM-like 2 [Lupinus angustifolius]	PF04674	Phosphate-induced protein 1 conserved region
TRINITY_DN10314_c0_g3			S:Function unknown	hypothetical protein TanjilG_00382 [Lupinus angustifolius]	PF04674	Phosphate-induced protein 1 conserved region
TRINITY_DN103147_c0_g1	CC:integral component of membrane			transmembrane protein, putative [Medicago truncatula]
TRINITY_DN103149_c0_g1			S:Function unknown	PREDICTED: uncharacterized protein LOC109362039 [Lupinus angustifolius] >OIW00892.1 hypothetical protein TanjilG_20893 [Lupinus angustifolius]
TRINITY_DN10315_c0_g1	MF:chaperone binding		S:Function unknown	PREDICTED: uncharacterized protein LOC109354224 [Lupinus angustifolius]	PF02179;PF00612	BAG domain;IQ calmodulin-binding motif
TRINITY_DN103151_c0_g1	MF:structural constituent of ribosome;BP:maturation of LSU-rRNA from tricistronic rRNA transcript ;CC:cytosolic large ribosomal subunit	Ribosome	L:Replication, recombination and repair	60S ribosomal protein L7-3 [Capsella rubella] >XP_010506317.1 PREDICTED: 60S ribosomal protein L7-3 [Camelina sativa] >XP_010506318.1 PREDICTED: 60S ribosomal protein L7-3 [Camelina sativa] >XP_010517998.1 PREDICTED: 60S ribosomal protein L7-3 [Camelina sativa] >XP_010518000.1 PREDICTED: 60S ribosomal protein L7-3 [Camelina sativa] >XP_020876723.1 60S ribosomal protein L7-3 [Arabidopsis lyrata su…	PF08079;PF00327	Ribosomal L30 N-terminal domain;Ribosomal protein L30p/L7e
TRINITY_DN103152_c0_g1	MF:large ribosomal subunit rRNA binding;CC:ribosome;CC:nucleolus;CC:cytosolic large ribosomal subunit;MF:structural constituent of ribosome;BP:translation	Ribosome	S:Function unknown	60S ribosomal protein L23 [Brachypodium distachyon] >XP_020170756.1 60S ribosomal protein L23-like [Aegilops tauschii subsp. tauschii] >BAK05203.1 predicted protein [Hordeum vulgare subsp. vulgare] >EMS56602.1 60S ribosomal protein L23 [Triticum urartu] >KQK23743.1 hypothetical protein BRADI_1g75790v3 [Brachypodium distachyon]	PF00238	Ribosomal protein L14p/L23e
TRINITY_DN103156_c0_g1	CC:retrotransposon nucleocapsid;BP:DNA integration;MF:transferase activity;MF:nucleic acid binding		L:Replication, recombination and repair	PREDICTED: uncharacterized protein LOC109328275 [Lupinus angustifolius]	PF14244	gag-polypeptide of LTR copia-type
TRINITY_DN103162_c0_g1	CC:integral component of membrane			PREDICTED: uncharacterized protein LOC109329217 [Lupinus angustifolius]
TRINITY_DN10317_c0_g1	CC:integral component of membrane;CC:membrane;MF:acylglycerol lipase activity	Glycerolipid metabolism	I:Lipid transport and metabolism	PREDICTED: uncharacterized protein LOC109337835 [Lupinus angustifolius]	PF12146;PF12697	Serine aminopeptidase, S33;Alpha/beta hydrolase family
TRINITY_DN10317_c0_g2	MF:hydrolase activity;CC:integral component of membrane;CC:membrane;MF:2-acylglycerol O-acyltransferase activity	Glycerolipid metabolism	I:Lipid transport and metabolism	PREDICTED: uncharacterized protein LOC109337835 [Lupinus angustifolius]
TRINITY_DN10317_c1_g1	CC:integral component of membrane	Glycerolipid metabolism	I:Lipid transport and metabolism	PREDICTED: caffeoylshikimate esterase-like [Lupinus angustifolius] >OIW20769.1 hypothetical protein TanjilG_21991 [Lupinus angustifolius]	PF12146;PF00561;PF12697	Serine aminopeptidase, S33;alpha/beta hydrolase fold;Alpha/beta hydrolase family
TRINITY_DN103175_c0_g1	CC:cytoplasm;BP:nucleosome assembly;CC:nucleus		S:Function unknown	nucleosome assembly protein 1;1 isoform X2 [Aegilops tauschii subsp. tauschii]	PF00956	Nucleosome assembly protein
TRINITY_DN103182_c0_g1	MF:structural constituent of ribosome;BP:translation;CC:ribosome	Ribosome	B:Chromatin structure and dynamics	predicted protein [Hordeum vulgare subsp. vulgare]	PF01199	Ribosomal protein L34e
TRINITY_DN103186_c0_g1	CC:mitochondrial inner membrane;MF:transmembrane transporter activity;CC:integral component of membrane		S:Function unknown	predicted protein [Hordeum vulgare subsp. vulgare]	PF00153	Mitochondrial carrier protein
TRINITY_DN103189_c0_g1	CC:retrotransposon nucleocapsid;BP:DNA integration;MF:RNA-directed DNA polymerase activity;MF:methylmalonate-semialdehyde dehydrogenase ;MF:nucleic acid binding		L:Replication, recombination and repair;S:Function unknown	Retrovirus-related Pol polyprotein from transposon TNT 1-94 [Cajanus cajan]
TRINITY_DN10319_c0_g1	BP:RNA modification		S:Function unknown	PREDICTED: pentatricopeptide repeat-containing protein At3g46790, chloroplastic-like [Lupinus angustifolius] >OIV93554.1 hypothetical protein TanjilG_04786 [Lupinus angustifolius]	PF13041;PF01535;PF12854;PF13812;PF17177	PPR repeat family;PPR repeat;PPR repeat;Pentatricopeptide repeat domain;Pentacotripeptide-repeat region of PRORP
TRINITY_DN103190_c0_g1	CC:U4/U6 x U5 tri-snRNP complex;CC:small-subunit processome;CC:box C/D snoRNP complex;CC:ribosome;CC:nucleolus;CC:ribonucleoprotein complex;BP:ribosome biogenesis;BP:mRNA splicing, via spliceosome;MF:RNA binding;BP:maturation of LSU-rRNA	Ribosome biogenesis in eukaryotes;Spliceosome	S:Function unknown	PREDICTED: NHP2-like protein 1 [Capsicum annuum]	PF01248;PF08228;PF15608	Ribosomal protein L7Ae/L30e/S12e/Gadd45 family;RNase P subunit Pop3;PELOTA RNA binding domain
TRINITY_DN103193_c0_g1	MF:transferase activity;MF:ATP binding	Ubiquitin mediated proteolysis;Protein processing in endoplasmic reticulum	S:Function unknown	hypothetical protein EUGRSUZ_F00103 [Eucalyptus grandis]	PF00179	Ubiquitin-conjugating enzyme
TRINITY_DN103196_c0_g1	MF:oxidoreductase activity, acting on paired donors, with oxidation of a pair of donors resulting in the reduction of molecular oxygen to two molecules of water;CC:integral component of membrane;BP:lipid metabolic process		S:Function unknown	predicted protein [Hordeum vulgare subsp. vulgare]	PF00487;PF11960	Fatty acid desaturase;Domain of unknown function
TRINITY_DN1032_c0_g1	MF:flavin-linked sulfhydryl oxidase activity;CC:extracellular space;CC:integral component of membrane;CC:cell;MF:protein disulfide isomerase activity;CC:integral component of Golgi membrane;BP:cell redox homeostasis		O:Posttranslational modification, protein turnover, chaperones	PREDICTED: sulfhydryl oxidase 2-like isoform X1 [Lupinus angustifolius] >XP_019451044.1 PREDICTED: sulfhydryl oxidase 2-like isoform X1 [Lupinus angustifolius] >OIW06966.1 hypothetical protein TanjilG_18354 [Lupinus angustifolius]	PF04777;PF00085;PF04756	Erv1 / Alr family;Thioredoxin;OST3 / OST6 family, transporter family
TRINITY_DN1032_c0_g2	MF:flavin-linked sulfhydryl oxidase activity;BP:cell redox homeostasis;CC:integral component of membrane;CC:cell		O:Posttranslational modification, protein turnover, chaperones	PREDICTED: sulfhydryl oxidase 2-like isoform X1 [Lupinus angustifolius] >OIW12900.1 hypothetical protein TanjilG_15820 [Lupinus angustifolius]
TRINITY_DN1032_c0_g3	MF:flavin-linked sulfhydryl oxidase activity;CC:extracellular space;CC:integral component of membrane;CC:cell;MF:protein disulfide isomerase activity;CC:integral component of Golgi membrane;BP:cell redox homeostasis		O:Posttranslational modification, protein turnover, chaperones	PREDICTED: sulfhydryl oxidase 1-like [Lupinus angustifolius]
TRINITY_DN10320_c0_g1	CC:integral component of membrane;CC:nucleus;MF:magnesium-dependent protein serine/threonine phosphatase activity;MF:protein serine/threonine phosphatase activity;MF:metal ion binding;CC:cytosol	MAPK signaling pathway - plant;Plant hormone signal transduction	T:Signal transduction mechanisms	PREDICTED: probable protein phosphatase 2C 6 [Lupinus angustifolius] >OIW09989.1 hypothetical protein TanjilG_32729 [Lupinus angustifolius]	PF00481	Protein phosphatase 2C
TRINITY_DN103201_c0_g1			S:Function unknown;S:Function unknown	hypothetical protein TanjilG_31923 [Lupinus angustifolius]	PF12023	Domain of unknown function
TRINITY_DN103206_c0_g1				hypothetical protein TanjilG_28969, partial [Lupinus angustifolius]
TRINITY_DN103208_c0_g1	MF:pectinesterase inhibitor activity;CC:integral component of membrane			hypothetical protein TanjilG_04265 [Lupinus angustifolius]
TRINITY_DN10321_c0_g1	CC:retrotransposon nucleocapsid;CC:integral component of membrane;BP:DNA integration;MF:zinc ion binding;MF:nucleic acid binding;MF:RNA-directed DNA polymerase activity		S:Function unknown	polyprotein [Phaseolus vulgaris]	PF14223;PF00098;PF13961;PF03732	gag-polypeptide of LTR copia-type;Zinc knuckle;Domain of unknown function ;Retrotransposon gag protein
TRINITY_DN103211_c0_g1	MF:transcription factor activity, sequence-specific DNA binding		K:Transcription	PREDICTED: basic leucine zipper 43-like [Lupinus angustifolius] >OIW21643.1 hypothetical protein TanjilG_06947 [Lupinus angustifolius]	PF00170;PF07716;PF03131;PF17078	bZIP transcription factor;Basic region leucine zipper;bZIP Maf transcription factor;SWI5-dependent HO expression protein 3
TRINITY_DN10322_c0_g1			S:Function unknown	PREDICTED: BTB/POZ domain-containing protein At3g05675 [Lupinus angustifolius] >XP_019455482.1 PREDICTED: BTB/POZ domain-containing protein At3g05675 [Lupinus angustifolius] >XP_019455483.1 PREDICTED: BTB/POZ domain-containing protein At3g05675 [Lupinus angustifolius] >OIW05172.1 hypothetical protein TanjilG_19803 [Lupinus angustifolius]
TRINITY_DN103222_c0_g1	CC:retrotransposon nucleocapsid;BP:DNA integration;MF:RNA-directed DNA polymerase activity;MF:nucleic acid binding		S:Function unknown;S:Function unknown	PREDICTED: uncharacterized protein LOC109348071 [Lupinus angustifolius]	PF00665	Integrase core domain
TRINITY_DN103227_c0_g1	MF:structural constituent of ribosome;CC:ribosome;BP:translation;MF:rRNA binding	Ribosome	S:Function unknown	hypothetical protein TSUD_161670 [Trifolium subterraneum]	PF00900;PF16121;PF08071;PF01479;PF00467	Ribosomal family S4e;40S ribosomal protein S4 C-terminus;RS4NT ;S4 domain;KOW motif
TRINITY_DN10323_c0_g1		Homologous recombination		PREDICTED: SNF2 domain-containing protein CLASSY 4-like isoform X2 [Lupinus angustifolius] >OIV92799.1 hypothetical protein TanjilG_00933 [Lupinus angustifolius]
TRINITY_DN10323_c0_g3	MF:structural constituent of ribosome;BP:translation;MF:ATP binding;CC:ribosome	Homologous recombination		PREDICTED: SNF2 domain-containing protein CLASSY 4-like isoform X2 [Lupinus angustifolius] >OIV92799.1 hypothetical protein TanjilG_00933 [Lupinus angustifolius]
TRINITY_DN10324_c0_g1	BP:response to auxin	Plant hormone signal transduction	S:Function unknown	hypothetical protein TanjilG_22033 [Lupinus angustifolius]	PF02519	Auxin responsive protein
TRINITY_DN103243_c0_g1	CC:cytosolic ribosome;CC:cytosolic small ribosomal subunit;CC:cell wall;CC:membrane;MF:structural constituent of ribosome;CC:polysomal ribosome;BP:translation;CC:ribosome	Ribosome	S:Function unknown	unknown [Lotus japonicus]	PF01282	Ribosomal protein S24e
TRINITY_DN10325_c0_g1	MF:kinase activity		S:Function unknown	PREDICTED: uncharacterized protein LOC105803423 isoform X1 [Gossypium raimondii] >XP_012491057.1 PREDICTED: uncharacterized protein LOC105803423 isoform X1 [Gossypium raimondii] >XP_016696334.1 PREDICTED: uncharacterized protein LOC107912601 isoform X1 [Gossypium hirsutum]	PF07647;PF00536	SAM domain ;SAM domain
TRINITY_DN103254_c0_g1			S:Function unknown;S:Function unknown	hypothetical protein TanjilG_01343 [Lupinus angustifolius]	PF00646;PF12937	F-box domain;F-box-like
TRINITY_DN103259_c0_g1	CC:ribosome;CC:integral component of membrane;BP:translation;MF:structural constituent of ribosome;MF:RNA binding;CC:cytosol	Ribosome	S:Function unknown	unknown [Lotus japonicus]	PF00416	Ribosomal protein S13/S18
TRINITY_DN10326_c0_g1	BP:activation of MAPK activity;CC:cytoplasm;BP:stress-activated protein kinase signaling cascade;BP:regulation of defense response to bacterium;BP:cellular response to chitin;CC:cytosol;CC:plasma membrane;BP:regulation of defense response by callose deposition;BP:activation of protein kinase activity;BP:protein autophosphorylation;MF:protein serine/threonine kinase activity;BP:signal transduction…		T:Signal transduction mechanisms	PREDICTED: mitogen-activated protein kinase kinase kinase YODA-like isoform X2 [Lupinus angustifolius]	PF00069;PF07714;PF14531	Protein kinase domain;Protein tyrosine kinase;Kinase-like
TRINITY_DN10326_c0_g2	BP:activation of MAPK activity;BP:regulation of defense response to bacterium;BP:cellular response to chitin;CC:cytosol;CC:plasma membrane;BP:regulation of defense response by callose deposition;BP:protein autophosphorylation;BP:regulation of defense response to fungus;MF:protein kinase activity;MF:MAP kinase kinase kinase activity;BP:pattern recognition receptor signaling pathway;MF:ATP binding			hypothetical protein TanjilG_22770 [Lupinus angustifolius]
TRINITY_DN103265_c0_g1				hypothetical protein KK1_044473, partial [Cajanus cajan]
TRINITY_DN10327_c0_g1	CC:amyloplast;BP:gravitropism;MF:ubiquitin protein ligase activity;MF:ubiquitin-protein transferase activity;BP:ubiquitin-dependent protein catabolic process		O:Posttranslational modification, protein turnover, chaperones	PREDICTED: E3 ubiquitin-protein ligase SGR9, amyloplastic [Lupinus angustifolius] >OIV90470.1 hypothetical protein TanjilG_18654 [Lupinus angustifolius]	PF13639;PF17123;PF13923;PF12678;PF13445;PF13920;PF14634;PF00097	Ring finger domain;RING-like zinc finger;Zinc finger, C3HC4 type ;RING-H2 zinc finger domain;RING-type zinc-finger;Zinc finger, C3HC4 type ;zinc-RING finger domain;Zinc finger, C3HC4 type
TRINITY_DN103271_c0_g1	BP:deoxyribonucleotide biosynthetic process;MF:metal ion binding;MF:oxidoreductase activity	Pyrimidine metabolism;Glutathione metabolism;Purine metabolism	S:Function unknown	ribonucleoside-diphosphate reductase small chain-like [Quercus suber]	PF00268	Ribonucleotide reductase, small chain
TRINITY_DN10328_c0_g1	CC:nucleus;BP:DNA replication;BP:response to sucrose;CC:origin recognition complex;MF:DNA binding		L:Replication, recombination and repair	PREDICTED: origin of replication complex subunit 4 [Lupinus angustifolius] >XP_019426701.1 PREDICTED: origin of replication complex subunit 4 [Lupinus angustifolius]	PF14629;PF00004;PF13191;PF13401	Origin recognition complex ;ATPase family associated with various cellular activities ;AAA ATPase domain;AAA domain
TRINITY_DN103287_c0_g1	CC:ribosome		S:Function unknown	guanine nucleotide-binding protein subunit gamma 3 [Cicer arietinum]	PF00400;PF12894;PF08662	WD domain, G-beta repeat;Anaphase-promoting complex subunit 4 WD40 domain;Eukaryotic translation initiation factor eIF2A
TRINITY_DN10329_c1_g1	CC:dolichol-phosphate-mannose synthase complex;BP:protein glycosylation;CC:endoplasmic reticulum membrane			Dolichyl-diphosphooligosaccharide--protein glycosyltransferase 48 kDa subunit [Spatholobus suberectus]
TRINITY_DN10329_c1_g5	MF:magnesium ion binding;BP:carbohydrate metabolic process;MF:intramolecular transferase activity, phosphotransferases			hypothetical protein TanjilG_20972 [Lupinus angustifolius]
TRINITY_DN103298_c0_g1				PREDICTED: uncharacterized protein LOC109338411 [Lupinus angustifolius]	PF13456	Reverse transcriptase-like
TRINITY_DN1033_c0_g1	MF:protein tyrosine phosphatase activity	Phosphatidylinositol signaling system;Inositol phosphate metabolism	S:Function unknown	hypothetical protein TanjilG_05164 [Lupinus angustifolius]	PF06602	Myotubularin-like phosphatase domain
TRINITY_DN1033_c1_g1	MF:protein tyrosine phosphatase activity	Phosphatidylinositol signaling system;Inositol phosphate metabolism	S:Function unknown	PREDICTED: phosphatidylinositol-3-phosphatase myotubularin-1-like isoform X1 [Lupinus angustifolius] >OIV90583.1 hypothetical protein TanjilG_01664 [Lupinus angustifolius]
TRINITY_DN10330_c0_g1	CC:integral component of membrane		S:Function unknown	PREDICTED: nucleolin [Lupinus angustifolius]
TRINITY_DN103306_c0_g1	BP:DNA integration;MF:zinc ion binding;MF:nucleic acid binding			PREDICTED: uncharacterized protein LOC109341859 [Lupinus angustifolius]
TRINITY_DN103317_c0_g1			S:Function unknown	alpha-expansin 8 precursor family protein [Populus tomentosa]	PF03098	Animal haem peroxidase
TRINITY_DN103318_c0_g1	MF:structural constituent of ribosome;CC:cytosolic small ribosomal subunit;BP:translation;CC:ribosome	Ribosome	S:Function unknown	predicted protein [Hordeum vulgare subsp. vulgare]	PF01248	Ribosomal protein L7Ae/L30e/S12e/Gadd45 family
TRINITY_DN10333_c0_g1	MF:transferase activity;MF:ATP binding	Ubiquitin mediated proteolysis;Protein processing in endoplasmic reticulum	O:Posttranslational modification, protein turnover, chaperones	hypothetical protein GLYMA_12G080600 [Glycine max]	PF00179	Ubiquitin-conjugating enzyme
TRINITY_DN10334_c0_g1	MF:microtubule binding;BP:microtubule-based movement;BP:root development;MF:ATP binding;MF:ATPase activity;CC:kinesin complex;BP:regulation of microtubule-based process;CC:microtubule;MF:microtubule motor activity	Endocytosis	S:Function unknown	PREDICTED: kinesin-like protein KIN-UB [Lupinus angustifolius] >OIW07645.1 hypothetical protein TanjilG_17660 [Lupinus angustifolius]	PF00225;PF16796;PF00514;PF13646;PF04826	Kinesin motor domain;Microtubule binding;Armadillo/beta-catenin-like repeat;HEAT repeats;Armadillo-like
TRINITY_DN10335_c0_g1				hypothetical protein TanjilG_29872 [Lupinus angustifolius]
TRINITY_DN103351_c0_g1			S:Function unknown;S:Function unknown	hypothetical protein TanjilG_03369 [Lupinus angustifolius]	PF00400	WD domain, G-beta repeat
TRINITY_DN10336_c0_g1			S:Function unknown	PREDICTED: uncharacterized protein LOC109353406 isoform X1 [Lupinus angustifolius]
TRINITY_DN103366_c0_g1	CC:retrotransposon nucleocapsid;BP:DNA integration;MF:methylmalonate-semialdehyde dehydrogenase ;MF:zinc ion binding;MF:nucleic acid binding		L:Replication, recombination and repair;S:Function unknown	uncharacterized protein LOC113870480 [Abrus precatorius]
TRINITY_DN10337_c0_g1	CC:integral component of membrane;MF:protein serine/threonine kinase activity;MF:transmembrane receptor protein tyrosine kinase activity;CC:plasma membrane;BP:protein autophosphorylation;MF:ATP binding		T:Signal transduction mechanisms	hypothetical protein TanjilG_15181 [Lupinus angustifolius]	PF00069;PF07714	Protein kinase domain;Protein tyrosine kinase
TRINITY_DN103380_c0_g1	MF:structural constituent of ribosome;BP:cytoplasmic translation;BP:ribosomal small subunit assembly;BP:translation;CC:cytosolic small ribosomal subunit	Ribosome	U:Intracellular trafficking, secretion, and vesicular transport	40S ribosomal protein Sa-2-like [Asparagus officinalis] >ONK65395.1 uncharacterized protein A4U43_C07F36660 [Asparagus officinalis]	PF00318	Ribosomal protein S2
TRINITY_DN10339_c0_g1	BP:phosphatidylinositol biosynthetic process;CC:PAS complex		U:Intracellular trafficking, secretion, and vesicular transport	hypothetical protein TanjilG_13829 [Lupinus angustifolius]
TRINITY_DN103390_c0_g1	CC:integral component of membrane		S:Function unknown	PREDICTED: uncharacterized protein LOC109335669 [Lupinus angustifolius] >XP_019427373.1 PREDICTED: uncharacterized protein LOC109335669 [Lupinus angustifolius]	PF14283	Domain of unknown function
TRINITY_DN103393_c0_g1	BP:assembly of large subunit precursor of preribosome;CC:ribosome;CC:cytosolic large ribosomal subunit;MF:structural constituent of ribosome;MF:RNA binding;MF:metal ion binding;BP:translation;BP:ribosomal large subunit assembly	Ribosome	O:Posttranslational modification, protein turnover, chaperones	predicted protein [Hordeum vulgare subsp. vulgare]	PF01246	Ribosomal protein L24e
TRINITY_DN1034_c0_g1	BP:protein maturation by iron-sulfur cluster transfer;MF:4 iron, 4 sulfur cluster binding;BP:protein maturation;MF:iron-sulfur cluster binding;MF:2 iron, 2 sulfur cluster binding;CC:mitochondrion;MF:structural molecule activity;BP:protein maturation by [4Fe-4S] cluster transfer;MF:iron ion binding;BP:iron-sulfur cluster assembly			PREDICTED: iron-sulfur assembly protein IscA-like 2, mitochondrial [Lupinus angustifolius] >OIV92216.1 hypothetical protein TanjilG_31135 [Lupinus angustifolius]	PF01521	Iron-sulphur cluster biosynthesis
TRINITY_DN10340_c0_g1			S:Function unknown	PREDICTED: CBS domain-containing protein CBSX5-like [Lupinus angustifolius] >OIV91751.1 hypothetical protein TanjilG_26604 [Lupinus angustifolius]	PF00571	CBS domain
TRINITY_DN103402_c0_g1	MF:RNA-directed DNA polymerase activity;CC:integral component of membrane;MF:RNA binding		S:Function unknown;S:Function unknown	PREDICTED: uncharacterized protein LOC109339150 [Lupinus angustifolius]	PF00078	Reverse transcriptase
TRINITY_DN103407_c0_g1	CC:integral component of membrane		O:Posttranslational modification, protein turnover, chaperones	PREDICTED: uncharacterized protein LOC109357844 [Lupinus angustifolius]	PF00011	Hsp20/alpha crystallin family
TRINITY_DN10341_c0_g1	BP:developmental process;CC:plastid;BP:chloroplast organization;BP:regulation of transcription, DNA-templated;BP:embryo development ending in seed dormancy;BP:rRNA transcription from plastid promoter;MF:double-stranded DNA binding;BP:RNA splicing;CC:chloroplast		S:Function unknown	hypothetical protein TanjilG_25274 [Lupinus angustifolius]	PF02536	mTERF
TRINITY_DN103416_c0_g1				PREDICTED: uncharacterized protein LOC109332476 [Lupinus angustifolius] >XP_019423004.1 PREDICTED: uncharacterized protein LOC109332478 [Lupinus angustifolius]
TRINITY_DN10342_c0_g1	MF:ATP binding;BP:RNA processing;MF:protein kinase activity	Spliceosome	A:RNA processing and modification	PREDICTED: crooked neck-like protein 1 [Lupinus angustifolius] >OIV94933.1 hypothetical protein TanjilG_22130 [Lupinus angustifolius]	PF02184;PF05843;PF14559;PF13429;PF13431	HAT ;Suppressor of forked protein ;Tetratricopeptide repeat;Tetratricopeptide repeat;Tetratricopeptide repeat
TRINITY_DN103428_c0_g1	MF:structural constituent of ribosome;BP:translation;CC:ribosome	Ribosome	S:Function unknown	uncharacterized protein LOC111999795 [Quercus suber]	PF00240;PF11976;PF01020;PF14560	Ubiquitin family;Ubiquitin-2 like Rad60 SUMO-like;Ribosomal L40e family;Ubiquitin-like domain
TRINITY_DN10343_c0_g1	CC:Golgi apparatus;BP:protein glycosylation;CC:integral component of membrane;MF:carbohydrate binding;MF:galactosyltransferase activity;MF:galactosylxylosylprotein 3-beta-galactosyltransferase activity		S:Function unknown	PREDICTED: hydroxyproline O-galactosyltransferase GALT6-like [Lupinus angustifolius] >OIW10511.1 hypothetical protein TanjilG_15883 [Lupinus angustifolius]	PF00337	Galactoside-binding lectin
TRINITY_DN103432_c0_g1	MF:pantothenate kinase activity		S:Function unknown	putative protein [Arabidopsis thaliana] >CAB80253.1 putative protein [Arabidopsis thaliana]
TRINITY_DN103437_c0_g1	MF:structural constituent of ribosome;BP:translation;CC:ribosome	Ribosome	U:Intracellular trafficking, secretion, and vesicular transport	60S ribosomal protein L7-2-like [Durio zibethinus]	PF03868;PF01159	Ribosomal protein L6, N-terminal domain;Ribosomal protein L6e
TRINITY_DN10344_c0_g1	BP:regulation of transcription, DNA-templated;CC:nucleus;CC:CCR4-NOT core complex;CC:cytoplasmic mRNA processing body;BP:negative regulation of translation	RNA degradation	S:Function unknown	hypothetical protein TanjilG_05246 [Lupinus angustifolius]	PF04065;PF14523	Not1 N-terminal domain, CCR4-Not complex component;Syntaxin-like protein
TRINITY_DN103447_c0_g1		Ribosome	S:Function unknown	unnamed protein product [Brassica oleracea]	PF03501	Plectin/S10 domain
TRINITY_DN103448_c0_g1	BP:protein oligomerization;BP:protein folding;BP:response to hydrogen peroxide;MF:unfolded protein binding;BP:response to reactive oxygen species;BP:response to salt stress;BP:response to heat;MF:protein self-association	Protein processing in endoplasmic reticulum	O:Posttranslational modification, protein turnover, chaperones;O:Posttranslational modification, protein turnover, chaperones	18.2 kDa class I heat shock protein-like [Cicer arietinum]	PF00011;PF17886	Hsp20/alpha crystallin family;HSP20-like domain found in ArsA
TRINITY_DN10345_c0_g1	MF:protein phosphatase binding;BP:regulation of phosphoprotein phosphatase activity		T:Signal transduction mechanisms	hypothetical protein TanjilG_17140 [Lupinus angustifolius]	PF04499	SIT4 phosphatase-associated protein
TRINITY_DN10345_c0_g2	MF:protein phosphatase binding;BP:regulation of phosphoprotein phosphatase activity		T:Signal transduction mechanisms	hypothetical protein TanjilG_23595 [Lupinus angustifolius]	PF04499	SIT4 phosphatase-associated protein
TRINITY_DN103454_c0_g1	CC:retrotransposon nucleocapsid;BP:DNA integration;MF:nucleic acid binding		L:Replication, recombination and repair	PREDICTED: uncharacterized protein LOC109338075 [Lupinus angustifolius]
TRINITY_DN10346_c0_g1	CC:nucleus;MF:DNA binding	Base excision repair	B:Chromatin structure and dynamics	PREDICTED: HMG1/2-like protein isoform X1 [Lupinus angustifolius] >OIW14783.1 hypothetical protein TanjilG_05404 [Lupinus angustifolius]	PF00505	HMG
TRINITY_DN103463_c0_g1			S:Function unknown	hypothetical protein TanjilG_12820 [Lupinus angustifolius]	PF01344	Kelch motif
TRINITY_DN10347_c0_g1	MF:fructokinase activity;CC:cytosol;MF:hexokinase activity;MF:glucokinase activity;CC:cell;MF:mannokinase activity;BP:cellular glucose homeostasis;BP:glycolytic process;MF:ATP binding;MF:glucose binding	Amino sugar and nucleotide sugar metabolism;Glycolysis / Gluconeogenesis;Starch and sucrose metabolism;Fructose and mannose metabolism;Galactose metabolism	G:Carbohydrate transport and metabolism	PREDICTED: hexokinase-3-like isoform X1 [Lupinus angustifolius] >XP_019444620.1 PREDICTED: hexokinase-3-like isoform X2 [Lupinus angustifolius] >OIW11124.1 hypothetical protein TanjilG_22931 [Lupinus angustifolius]	PF00349;PF03727	Hexokinase;Hexokinase
TRINITY_DN10348_c0_g1	MF:protein serine/threonine kinase activity;BP:protein autophosphorylation		S:Function unknown	PREDICTED: uncharacterized protein LOC109353709 [Lupinus angustifolius] >OIW06942.1 hypothetical protein TanjilG_18330 [Lupinus angustifolius]	PF07816	Protein of unknown function
TRINITY_DN103480_c0_g1	CC:retrotransposon nucleocapsid;BP:DNA integration;MF:RNA-directed DNA polymerase activity;MF:zinc ion binding;MF:nucleic acid binding		S:Function unknown	Integrase, catalytic core [Corchorus capsularis]
TRINITY_DN10349_c0_g1	CC:integral component of membrane		S:Function unknown	PREDICTED: probable serine incorporator [Lupinus angustifolius] >XP_019424390.1 PREDICTED: probable serine incorporator [Lupinus angustifolius] >XP_019424391.1 PREDICTED: probable serine incorporator [Lupinus angustifolius]	PF03348	Serine incorporator
TRINITY_DN10349_c0_g2	CC:integral component of membrane;CC:membrane		S:Function unknown;S:Function unknown	PREDICTED: probable serine incorporator [Lupinus angustifolius] >XP_019436653.1 PREDICTED: probable serine incorporator [Lupinus angustifolius] >XP_019436654.1 PREDICTED: probable serine incorporator [Lupinus angustifolius]	PF03348	Serine incorporator
TRINITY_DN10349_c4_g1				PREDICTED: uncharacterized protein LOC109355381 [Lupinus angustifolius] >XP_019454062.1 PREDICTED: uncharacterized protein LOC109355381 [Lupinus angustifolius] >OIW06473.1 hypothetical protein TanjilG_05244 [Lupinus angustifolius]
TRINITY_DN103494_c0_g1	MF:structural constituent of ribosome;MF:RNA binding;CC:cytosolic large ribosomal subunit	Ribosome	J:Translation, ribosomal structure and biogenesis	60s ribosomal protein l30-2, partial [Nicotiana attenuata]	PF01248	Ribosomal protein L7Ae/L30e/S12e/Gadd45 family
TRINITY_DN1035_c0_g1	CC:integral component of membrane;CC:endoplasmic reticulum membrane		U:Intracellular trafficking, secretion, and vesicular transport	PREDICTED: reticulon-like protein B2 [Lupinus angustifolius] >OIV93653.1 hypothetical protein TanjilG_04885 [Lupinus angustifolius]	PF02453	Reticulon
TRINITY_DN1035_c0_g2	CC:integral component of membrane;CC:endoplasmic reticulum membrane		U:Intracellular trafficking, secretion, and vesicular transport	PREDICTED: reticulon-like protein B2 [Lupinus angustifolius] >OIW09943.1 hypothetical protein TanjilG_32092 [Lupinus angustifolius]	PF02453	Reticulon
TRINITY_DN10350_c0_g1	BP:defense response;CC:integral component of membrane;BP:response to biotic stimulus;MF:calmodulin binding		D:Cell cycle control, cell division, chromosome partitioning	PREDICTED: MLO-like protein 6 [Lupinus angustifolius]	PF03094	Mlo family
TRINITY_DN10351_c0_g1	MF:ubiquitin activating enzyme activity;MF:transferase activity, transferring acyl groups		K:Transcription	PREDICTED: putative E3 ubiquitin-protein ligase RING1a [Lupinus angustifolius]	PF13923;PF00097;PF13639;PF13920;PF14634;PF13445;PF15227	Zinc finger, C3HC4 type ;Zinc finger, C3HC4 type ;Ring finger domain;Zinc finger, C3HC4 type ;zinc-RING finger domain;RING-type zinc-finger;zinc finger of C3HC4-type, RING
TRINITY_DN103522_c0_g1	MF:actin binding;BP:actin filament depolymerization;CC:actin cytoskeleton		S:Function unknown	uncharacterized protein C2845_PM15G17220 [Panicum miliaceum]	PF00241	Cofilin/tropomyosin-type actin-binding protein
TRINITY_DN103523_c0_g1			S:Function unknown	hypothetical protein TanjilG_30474 [Lupinus angustifolius]
TRINITY_DN10353_c0_g1	MF:hydrolase activity;CC:integral component of membrane;BP:phosphatidylinositol dephosphorylation;MF:phosphatidylinositol-4,5-bisphosphate 5-phosphatase activity		T:Signal transduction mechanisms	PREDICTED: type I inositol polyphosphate 5-phosphatase 12-like isoform X2 [Lupinus angustifolius]	PF03372	Endonuclease/Exonuclease/phosphatase family
TRINITY_DN10353_c1_g1	MF:hydrolase activity;BP:phosphatidylinositol dephosphorylation;MF:phosphatidylinositol-4,5-bisphosphate 5-phosphatase activity		T:Signal transduction mechanisms	PREDICTED: type I inositol polyphosphate 5-phosphatase 12-like isoform X2 [Lupinus angustifolius] >OIV93743.1 hypothetical protein TanjilG_16594 [Lupinus angustifolius]	PF00635	MSP
TRINITY_DN103531_c0_g1	BP:mRNA catabolic process;MF:polyribonucleotide nucleotidyltransferase activity;MF:kinase activity;MF:RNA binding;BP:RNA processing	Pyrimidine metabolism;RNA degradation;Purine metabolism	J:Translation, ribosomal structure and biogenesis	polyribonucleotide nucleotidyltransferase 1, chloroplastic-like [Glycine max]	PF13966	zinc-binding in reverse transcriptase
TRINITY_DN10354_c0_g1	CC:integral component of membrane			hypothetical protein TanjilG_18130 [Lupinus angustifolius]
TRINITY_DN10354_c1_g1	MF:RNA-directed DNA polymerase activity;CC:proteasome complex;CC:integral component of membrane;MF:ATPase activity;MF:ATP binding		S:Function unknown;S:Function unknown	reverse transcriptase family member [Glycine max]
TRINITY_DN10355_c0_g1	BP:positive regulation of superoxide dismutase activity;BP:protein folding;MF:transition metal ion binding;MF:ATP binding		O:Posttranslational modification, protein turnover, chaperones	PREDICTED: 20 kDa chaperonin, chloroplastic-like [Lupinus angustifolius] >OIW21737.1 hypothetical protein TanjilG_09074 [Lupinus angustifolius]	PF00166	Chaperonin 10 Kd subunit
TRINITY_DN103559_c0_g1
TRINITY_DN103562_c0_g1	MF:cytochrome-c oxidase activity;CC:mitochondrial inner membrane;CC:integral component of membrane;MF:copper ion binding;CC:respiratory chain	Oxidative phosphorylation	C:Energy production and conversion	cytochrome oxidase subunit 2	PF00116;PF02790	Cytochrome C oxidase subunit II, periplasmic domain;Cytochrome C oxidase subunit II, transmembrane domain
TRINITY_DN10357_c0_g1	MF:ATP binding;MF:protein kinase activity		T:Signal transduction mechanisms	PREDICTED: LOW QUALITY PROTEIN: probable LRR receptor-like serine/threonine-protein kinase At1g05700 [Lupinus angustifolius]	PF12819	Malectin-like domain
TRINITY_DN103570_c0_g1				predicted protein [Hordeum vulgare subsp. vulgare]
TRINITY_DN103572_c0_g1	CC:integral component of membrane;CC:mitochondrion			hypothetical protein
TRINITY_DN10358_c0_g1	MF:catalytic activity;BP:pyridoxal phosphate biosynthetic process	Vitamin B6 metabolism	H:Coenzyme transport and metabolism	pyridoxal 5'-phosphate synthase subunit PDX1.3 [Cicer arietinum]	PF01680	SOR/SNZ family
TRINITY_DN103588_c0_g1	MF:cytochrome-c oxidase activity;CC:integral component of membrane;BP:aerobic electron transport chain;CC:mitochondrion	Oxidative phosphorylation	C:Energy production and conversion	cytochrome P450 [Lotus japonicus]	PF00510	Cytochrome c oxidase subunit III
TRINITY_DN10359_c0_g1	MF:structural constituent of ribosome;CC:ribosome;MF:RNA binding;BP:translation	Ribosome		PREDICTED: 40S ribosomal protein S18 [Lupinus angustifolius] >OIV91417.1 hypothetical protein TanjilG_02035 [Lupinus angustifolius]	PF00416	Ribosomal protein S13/S18
TRINITY_DN103595_c0_g1	MF:DNA-directed DNA polymerase activity;MF:methyltransferase activity;MF:ADP binding;MF:zinc ion binding;MF:nucleic acid binding		L:Replication, recombination and repair;K:Transcription	Retrovirus-related Pol polyprotein from transposon TNT 1-94, partial [Glycine soja]
TRINITY_DN103599_c0_g1	CC:integral component of membrane;MF:channel activity		S:Function unknown	PREDICTED: probable aquaporin TIP-type [Lupinus angustifolius] >OIW11308.1 hypothetical protein TanjilG_20457 [Lupinus angustifolius]	PF00230	Major intrinsic protein
TRINITY_DN1036_c0_g1	CC:extracellular space		S:Function unknown	PREDICTED: STS14 protein-like [Lupinus angustifolius] >OIW09744.1 hypothetical protein TanjilG_14267 [Lupinus angustifolius]	PF00188	Cysteine-rich secretory protein family
TRINITY_DN10360_c0_g1	CC:integral component of membrane;MF:channel activity		G:Carbohydrate transport and metabolism	PREDICTED: probable aquaporin TIP-type RB7-18C [Lupinus angustifolius] >OIW10843.1 hypothetical protein TanjilG_27789 [Lupinus angustifolius]	PF00230	Major intrinsic protein
TRINITY_DN103606_c0_g1				PREDICTED: uncharacterized protein LOC109327683 [Lupinus angustifolius]
TRINITY_DN10361_c0_g2	CC:chloroplast thylakoid membrane;CC:chloroplast envelope;MF:chlorophyll binding;CC:photosystem I;CC:photosystem II;BP:response to light stimulus;CC:integral component of membrane;CC:plastoglobule;BP:protein-chromophore linkage;BP:response to herbicide;BP:photosynthesis, light harvesting in photosystem I;BP:photosynthesis, light harvesting in photosystem II;BP:regulation of stomatal movement;MF:p…	Photosynthesis - antenna proteins	S:Function unknown	light-harvesting complex I chlorophyll a/b binding protein 2 [Vigna unguiculata]	PF00504	Chlorophyll A-B binding protein
TRINITY_DN10361_c4_g1	CC:integral component of membrane;MF:electron carrier activity			hypothetical protein CR513_29583, partial [Mucuna pruriens]
TRINITY_DN103617_c0_g1	BP:negative regulation of cytokinin-activated signaling pathway;CC:cytoplasm;BP:root meristem growth;BP:regulation of auxin polar transport;CC:nucleus;BP:positive regulation of gene expression	Arachidonic acid metabolism	S:Function unknown	uncharacterized protein C2845_PM01G33590 [Panicum miliaceum]	PF04969	CS domain
TRINITY_DN10362_c0_g1	BP:regulation of transcription, DNA-templated;CC:integral component of membrane;MF:metal ion binding;MF:histone binding			PREDICTED: PHD finger protein ALFIN-LIKE 3-like [Lupinus angustifolius] >OIW03762.1 hypothetical protein TanjilG_30038 [Lupinus angustifolius]	PF00628	PHD-finger
TRINITY_DN103623_c0_g1	BP:drug transmembrane transport;MF:antiporter activity;CC:integral component of membrane;MF:xenobiotic transporter activity		S:Function unknown	hypothetical protein TanjilG_07374 [Lupinus angustifolius]	PF01554	MatE
TRINITY_DN103624_c0_g1
TRINITY_DN10363_c0_g1	MF:hydrolase activity;CC:integral component of membrane		S:Function unknown	uncharacterized protein LOC109812303 isoform X1 [Cajanus cajan] >XP_029130010.1 uncharacterized protein LOC109812303 isoform X1 [Cajanus cajan]
TRINITY_DN103635_c0_g1	CC:nucleus;MF:DNA binding		K:Transcription	PREDICTED: myb family transcription factor PHL11-like isoform X1 [Lupinus angustifolius] >OIW10709.1 hypothetical protein TanjilG_16081 [Lupinus angustifolius]	PF14379;PF00249	MYB-CC type transfactor, LHEQLE motif;Myb-like DNA-binding domain
TRINITY_DN10364_c0_g1	CC:integral component of membrane;MF:7,9,9'-tricis-neurosporene;MF:hydrolase activity, acting on ester bonds;MF:9,9'-dicis-carotene		S:Function unknown	PREDICTED: GDSL esterase/lipase At1g71691 [Lupinus angustifolius]	PF00657	GDSL-like Lipase/Acylhydrolase
TRINITY_DN10365_c0_g1	MF:ligase activity;MF:ubiquitin-protein transferase activity			PREDICTED: BOI-related E3 ubiquitin-protein ligase 1-like isoform X1 [Lupinus angustifolius] >OIW10576.1 hypothetical protein TanjilG_15948 [Lupinus angustifolius]	PF13920	Zinc finger, C3HC4 type
TRINITY_DN10365_c0_g2	MF:ligase activity;MF:ubiquitin-protein transferase activity			PREDICTED: BOI-related E3 ubiquitin-protein ligase 1-like [Lupinus angustifolius] >OIV93072.1 hypothetical protein TanjilG_20734 [Lupinus angustifolius]	PF13920	Zinc finger, C3HC4 type
TRINITY_DN103658_c0_g1	CC:prefoldin complex;BP:protein folding;MF:unfolded protein binding		S:Function unknown	PREDICTED: prefoldin subunit 6 [Beta vulgaris subsp. vulgaris] >KMS96530.1 hypothetical protein BVRB_8g202010 [Beta vulgaris subsp. vulgaris]	PF01920	Prefoldin subunit
TRINITY_DN103660_c0_g1				PREDICTED: uncharacterized protein LOC109350881 [Lupinus angustifolius] >OIW10656.1 hypothetical protein TanjilG_16028 [Lupinus angustifolius]
TRINITY_DN103663_c0_g1	BP:chromatin organization;CC:nucleus;MF:DNA binding;CC:nuclear chromatin;CC:nucleosome;MF:protein heterodimerization activity		S:Function unknown	PREDICTED: histone H2A variant 1-like [Prunus mume] >XP_020411067.1 histone H2A variant 1 isoform X2 [Prunus persica] >XP_021828697.1 histone H2A variant 1-like [Prunus avium] >ONI34268.1 hypothetical protein PRUPE_1G472200 [Prunus persica] >PQQ02512.1 histone H2A variant 1-like [Prunus yedoensis var. nudiflora]	PF00125;PF16211	Core histone H2A/H2B/H3/H4;C-terminus of histone H2A
TRINITY_DN10367_c0_g1			S:Function unknown	PREDICTED: uncharacterized protein LOC109348436 isoform X1 [Lupinus angustifolius] >XP_019444421.1 PREDICTED: uncharacterized protein LOC109348436 isoform X1 [Lupinus angustifolius] >XP_019444422.1 PREDICTED: uncharacterized protein LOC109348436 isoform X1 [Lupinus angustifolius] >OIW11246.1 hypothetical protein TanjilG_28337 [Lupinus angustifolius]	PF03455	dDENN domain
TRINITY_DN10368_c0_g1	MF:hydrolase activity;CC:integral component of membrane;MF:cation-transporting ATPase activity;MF:cadmium-exporting ATPase activity;MF:metal ion binding;MF:ATP binding		P:Inorganic ion transport and metabolism	PREDICTED: probable cadmium/zinc-transporting ATPase HMA1, chloroplastic isoform X1 [Lupinus angustifolius]	PF00122;PF00702	E1-E2 ATPase;haloacid dehalogenase-like hydrolase
TRINITY_DN10368_c0_g2	MF:hydrolase activity;CC:integral component of membrane;MF:nucleotide binding;MF:cation-transporting ATPase activity;MF:cadmium-exporting ATPase activity;MF:metal ion binding;MF:ATP binding		P:Inorganic ion transport and metabolism	PREDICTED: probable cadmium/zinc-transporting ATPase HMA1, chloroplastic isoform X2 [Lupinus angustifolius]
TRINITY_DN103680_c0_g1	CC:integral component of membrane;CC:mitochondrion		S:Function unknown	Os01g0256500, partial [Oryza sativa Japonica Group]
TRINITY_DN10369_c0_g1	CC:plasma membrane;MF:ubiquitin-protein transferase activity;MF:ATP binding;MF:protein kinase activity		T:Signal transduction mechanisms	PREDICTED: U-box domain-containing protein 32 isoform X4 [Lupinus angustifolius] >OIW06613.1 hypothetical protein TanjilG_04007 [Lupinus angustifolius]	PF07714;PF00069;PF04564	Protein tyrosine kinase;Protein kinase domain;U-box domain
TRINITY_DN103690_c0_g1			S:Function unknown;S:Function unknown	F-box/FBD/LRR-repeat protein [Spatholobus suberectus]	PF07723	Leucine Rich Repeat
TRINITY_DN1037_c0_g1	MF:RNA polymerase II core binding;CC:transcriptionally active chromatin;BP:negative regulation of flower development;BP:histone methylation;BP:histone modification;CC:Cdc73/Paf1 complex;BP:transcription elongation from RNA polymerase II promoter;MF:chromatin binding		K:Transcription	PREDICTED: protein PAF1 homolog [Lupinus angustifolius] >OIV89932.1 hypothetical protein TanjilG_00448 [Lupinus angustifolius]	PF03985	Paf1
TRINITY_DN10370_c0_g2	MF:protein serine/threonine kinase activity;MF:ATP binding		T:Signal transduction mechanisms	PREDICTED: casein kinase 1-like protein 12 [Lupinus angustifolius] >OIW19374.1 hypothetical protein TanjilG_03508 [Lupinus angustifolius]	PF00069;PF07714;PF17667	Protein kinase domain;Protein tyrosine kinase;Fungal protein kinase
TRINITY_DN10371_c0_g1	CC:integral component of membrane;BP:protein N-linked glycosylation;MF:alpha-;BP:N-glycan fucosylation		S:Function unknown	PREDICTED: uncharacterized protein LOC109336504 isoform X1 [Lupinus angustifolius] >XP_019428685.1 PREDICTED: uncharacterized protein LOC109336504 isoform X1 [Lupinus angustifolius] >XP_019428686.1 PREDICTED: uncharacterized protein LOC109336504 isoform X1 [Lupinus angustifolius] >XP_019428687.1 PREDICTED: uncharacterized protein LOC109336504 isoform X1 [Lupinus angustifolius] >XP_019428688.1 PRE…
TRINITY_DN103713_c0_g1	CC:chloroplast thylakoid membrane;CC:plastid;MF:NADH dehydrogenase ;BP:photosynthesis, light reaction;BP:ATP synthesis coupled electron transport;CC:plasma membrane;MF:quinone binding;CC:integral component of membrane;CC:chloroplast	Oxidative phosphorylation	U:Intracellular trafficking, secretion, and vesicular transport;U:Intracellular trafficking, secretion, and vesicular transport	NADH-plastoquinone oxidoreductase subunit 4L	PF00361	Proton-conducting membrane transporter
TRINITY_DN103714_c0_g1	BP:ribosomal small subunit assembly;CC:cytosolic small ribosomal subunit;MF:structural constituent of ribosome;MF:RNA binding;BP:translation;CC:small ribosomal subunit	Ribosome	U:Intracellular trafficking, secretion, and vesicular transport	40S ribosomal protein S15-4 [Manihot esculenta] >OAY61584.1 hypothetical protein MANES_01G200700 [Manihot esculenta]	PF00203	Ribosomal protein S19
TRINITY_DN103715_c0_g1	CC:ribosome;CC:cytosol;MF:structural constituent of ribosome;MF:RNA binding;BP:regulation of photoperiodism, flowering;BP:translation	Ribosome	U:Intracellular trafficking, secretion, and vesicular transport	40S ribosomal protein S18 [Populus trichocarpa] >XP_011032690.1 PREDICTED: 40S ribosomal protein S18-like [Populus euphratica] >ABK92692.1 unknown [Populus trichocarpa] >PNT37880.1 hypothetical protein POPTR_005G211200 [Populus trichocarpa] >TKS03511.1 hypothetical protein D5086_0000155080 [Populus alba]	PF00416	Ribosomal protein S13/S18
TRINITY_DN103719_c0_g1	MF:structural constituent of ribosome;CC:membrane;CC:cytosolic small ribosomal subunit;BP:translation;CC:ribosome	Ribosome	U:Intracellular trafficking, secretion, and vesicular transport	40S ribosomal protein S27 [Brachypodium distachyon] >KQJ99489.1 hypothetical protein BRADI_3g43475v3 [Brachypodium distachyon]	PF01283	Ribosomal protein S26e
TRINITY_DN10372_c0_g1	BP:proteolysis;MF:aspartic-type endopeptidase activity;BP:protein catabolic process		O:Posttranslational modification, protein turnover, chaperones	PREDICTED: basic 7S globulin 2-like [Lupinus angustifolius] >OIV91322.1 hypothetical protein TanjilG_01940 [Lupinus angustifolius]	PF14541;PF14543	Xylanase inhibitor C-terminal;Xylanase inhibitor N-terminal
TRINITY_DN10373_c0_g1	CC:integral component of membrane;BP:ATP synthesis coupled proton transport;MF:hydrogen ion transmembrane transporter activity;CC:mitochondrial proton-transporting ATP synthase complex, coupling factor F	Oxidative phosphorylation	I:Lipid transport and metabolism	hypothetical protein TanjilG_05670 [Lupinus angustifolius]
TRINITY_DN10373_c0_g3				hypothetical protein TanjilG_05675 [Lupinus angustifolius]
TRINITY_DN103731_c0_g1	BP:cell redox homeostasis;MF:protein disulfide oxidoreductase activity;BP:glycerol ether metabolic process;CC:cell		U:Intracellular trafficking, secretion, and vesicular transport;U:Intracellular trafficking, secretion, and vesicular transport	thioredoxin H2-like [Cajanus cajan]	PF00085;PF13905;PF13899;PF13098;PF08534;PF14595;PF00578	Thioredoxin;Thioredoxin-like;Thioredoxin-like;Thioredoxin-like domain;Redoxin;Thioredoxin;AhpC/TSA family
TRINITY_DN103737_c0_g1	CC:integral component of membrane		U:Intracellular trafficking, secretion, and vesicular transport	hypothetical protein KK1_031997, partial [Cajanus cajan]	PF11820	Protein of unknown function
TRINITY_DN10374_c0_g1	MF:ribonuclease III activity;BP:production of siRNA involved in RNA interference;CC:nucleus;BP:primary miRNA processing;MF:double-stranded RNA binding;BP:pre-miRNA processing;BP:RNA processing		S:Function unknown	PREDICTED: ribonuclease III domain-containing protein RNC1, chloroplastic-like [Lupinus angustifolius] >XP_019421275.1 PREDICTED: ribonuclease III domain-containing protein RNC1, chloroplastic [Lupinus angustifolius]	PF14622;PF00636	Ribonuclease-III-like;Ribonuclease III domain
TRINITY_DN103741_c0_g1				PREDICTED: uncharacterized protein LOC109361801 [Lupinus angustifolius]	PF13966	zinc-binding in reverse transcriptase
TRINITY_DN10375_c0_g1				hypothetical protein AMTR_s00028p00129850 [Amborella trichopoda]
TRINITY_DN10375_c0_g2	BP:carbohydrate metabolic process;MF:beta-glucosidase activity			Hydroxyisourate hydrolase [Spatholobus suberectus]	PF00232	Glycosyl hydrolase family 1
TRINITY_DN10376_c0_g1	BP:mRNA 3'-end processing;CC:mRNA cleavage and polyadenylation specificity factor complex;BP:pre-mRNA cleavage required for polyadenylation;MF:RNA binding;MF:mRNA binding	mRNA surveillance pathway	S:Function unknown	PREDICTED: cleavage stimulating factor 64 isoform X4 [Lupinus angustifolius]	PF00076;PF14327;PF14304;PF15861	RNA recognition motif. ;Hinge domain of cleavage stimulation factor subunit 2;Transcription termination and cleavage factor C-terminal;Partial cleavage stimulation factor domain
TRINITY_DN103765_c0_g1	MF:structural constituent of ribosome;CC:cytosolic small ribosomal subunit;BP:translation;CC:ribosome	Ribosome	U:Intracellular trafficking, secretion, and vesicular transport;U:Intracellular trafficking, secretion, and vesicular transport	PREDICTED: 40S ribosomal protein S15a-like isoform X1 [Populus euphratica]	PF00410	Ribosomal protein S8
TRINITY_DN10377_c0_g1	MF:nuclease activity;CC:cytoplasm;CC:RISC complex;BP:gene silencing by RNA		L:Replication, recombination and repair	PREDICTED: ribonuclease TUDOR 1-like [Lupinus angustifolius] >OIV98143.1 hypothetical protein TanjilG_12179 [Lupinus angustifolius]	PF00565	Staphylococcal nuclease homologue
TRINITY_DN10379_c0_g1	MF:DNA binding		S:Function unknown	PREDICTED: uncharacterized protein LOC109346201 [Lupinus angustifolius] >OIW13040.1 hypothetical protein TanjilG_17600 [Lupinus angustifolius]
TRINITY_DN10379_c0_g2			S:Function unknown	PREDICTED: uncharacterized protein LOC109336472 [Lupinus angustifolius]	PF13639;PF17123;PF00097;PF13923;PF13445;PF14570;PF14634;PF12678;PF08746	Ring finger domain;RING-like zinc finger;Zinc finger, C3HC4 type ;Zinc finger, C3HC4 type ;RING-type zinc-finger;RING/Ubox like zinc-binding domain;zinc-RING finger domain;RING-H2 zinc finger domain;RING-like domain
TRINITY_DN10379_c1_g1	MF:DNA binding		S:Function unknown	hypothetical protein DM860_000202 [Cuscuta australis]
TRINITY_DN103799_c0_g1	MF:transcription regulatory region DNA binding;MF:metal ion binding;CC:nucleus;MF:histone binding;BP:positive regulation of transcription from RNA polymerase II promoter;MF:RNA polymerase II regulatory region sequence-specific DNA binding;MF:chromatin binding		S:Function unknown	hypothetical protein TanjilG_04326 [Lupinus angustifolius]
TRINITY_DN1038_c0_g1	MF:histone-lysine N-methyltransferase activity;CC:nucleus;CC:chromosome;MF:zinc ion binding;MF:nucleic acid binding		S:Function unknown	PREDICTED: histone-lysine N-methyltransferase SUVR5 [Lupinus angustifolius] >XP_019444727.1 PREDICTED: histone-lysine N-methyltransferase SUVR5 [Lupinus angustifolius] >OIW10981.1 hypothetical protein TanjilG_22788 [Lupinus angustifolius]	PF00856	SET domain
TRINITY_DN1038_c0_g2	MF:histone-lysine N-methyltransferase activity;CC:nucleus;CC:chromosome;MF:zinc ion binding;MF:nucleic acid binding		S:Function unknown	HMG1/2-like protein [Cajanus cajan] >KYP36995.1 HMG1/2-like protein [Cajanus cajan]	PF00856	SET domain
TRINITY_DN1038_c1_g1	MF:histone-lysine N-methyltransferase activity;CC:nucleus;CC:chromosome;MF:zinc ion binding;MF:nucleic acid binding		S:Function unknown	hypothetical protein TanjilG_26785 [Lupinus angustifolius]	PF00856;PF05033	SET domain;Pre-SET motif
TRINITY_DN10380_c0_g1	CC:endoplasmic reticulum;BP:lipid transport;CC:integral component of membrane;CC:membrane;MF:lipid binding;BP:regulation of transcription, DNA-templated		S:Function unknown	synaptotagmin-5 [Cajanus cajan] >XP_020215536.1 synaptotagmin-5 [Cajanus cajan] >XP_020215544.1 synaptotagmin-5 [Cajanus cajan] >KYP76961.1 Extended synaptotagmin-2 [Cajanus cajan]	PF17047	Synaptotagmin-like mitochondrial-lipid-binding domain
TRINITY_DN10380_c0_g2	MF:phospholipase A2 activity consuming 1,2-dioleoylphosphatidylethanolamine;CC:endoplasmic reticulum;BP:lipid transport;CC:integral component of membrane;CC:membrane;MF:lipid binding;BP:regulation of transcription, DNA-templated;MF:phospholipase A2 activity ;MF:lysophospholipase activity;MF:phospholipase A2 activity		S:Function unknown	PREDICTED: synaptotagmin-5-like [Lupinus angustifolius] >OIW03126.1 hypothetical protein TanjilG_07278 [Lupinus angustifolius]	PF17047	Synaptotagmin-like mitochondrial-lipid-binding domain
TRINITY_DN103803_c0_g1	MF:structural constituent of ribosome;MF:RNA binding;CC:cytosolic large ribosomal subunit;BP:translation;CC:ribosome	Ribosome	K:Transcription	Ribosomal protein L22e [Cinnamomum micranthum f. kanehirae]	PF01776	Ribosomal L22e protein family
TRINITY_DN10381_c0_g1	MF:methyltransferase activity		S:Function unknown	PREDICTED: uncharacterized protein LOC109335271 [Lupinus angustifolius] >OIV90708.1 hypothetical protein TanjilG_15094 [Lupinus angustifolius]	PF07279	Protein of unknown function
TRINITY_DN10381_c0_g2	MF:methyltransferase activity		S:Function unknown	PREDICTED: uncharacterized protein LOC109335271 [Lupinus angustifolius] >OIV90708.1 hypothetical protein TanjilG_15094 [Lupinus angustifolius]	PF07279	Protein of unknown function
TRINITY_DN10381_c0_g3	MF:methyltransferase activity		S:Function unknown	PREDICTED: uncharacterized protein LOC109353025 [Lupinus angustifolius] >OIW07880.1 hypothetical protein TanjilG_19981 [Lupinus angustifolius]	PF07279	Protein of unknown function
TRINITY_DN103823_c0_g1	CC:ribosome;CC:DNA-directed RNA polymerase III complex;MF:structural constituent of ribosome;MF:DNA binding;MF:DNA-directed RNA polymerase activity;BP:transcription from RNA polymerase III promoter;BP:translation	Ribosome	O:Posttranslational modification, protein turnover, chaperones	60S ribosomal protein L15 [Quercus suber] >XP_023903604.1 60S ribosomal protein L15 [Quercus suber]	PF00827	Ribosomal L15
TRINITY_DN10383_c0_g1	BP:cell wall modification;CC:integral component of membrane;MF:pectinesterase activity;MF:aspartyl esterase activity;MF:enzyme inhibitor activity;BP:pectin catabolic process		G:Carbohydrate transport and metabolism	PREDICTED: probable pectinesterase/pectinesterase inhibitor 61 [Lupinus angustifolius] >OIV95144.1 hypothetical protein TanjilG_21534 [Lupinus angustifolius]	PF01095;PF12708	Pectinesterase;Pectate lyase superfamily protein
TRINITY_DN10383_c0_g2	BP:cell wall modification;CC:integral component of membrane;MF:pectinesterase activity;MF:aspartyl esterase activity;MF:enzyme inhibitor activity;BP:pectin catabolic process		G:Carbohydrate transport and metabolism	PREDICTED: probable pectinesterase/pectinesterase inhibitor 61 [Lupinus angustifolius] >OIV95144.1 hypothetical protein TanjilG_21534 [Lupinus angustifolius]	PF01095;PF04043	Pectinesterase;Plant invertase/pectin methylesterase inhibitor
TRINITY_DN10384_c0_g1			S:Function unknown	PREDICTED: uncharacterized protein LOC109342935 isoform X3 [Lupinus angustifolius]	PF14709	double strand RNA binding domain from DEAD END PROTEIN 1
TRINITY_DN103852_c0_g1	BP:response to hormone;BP:regulation of transcription, DNA-templated;CC:nucleus;BP:auxin-activated signaling pathway;MF:DNA binding		K:Transcription	PREDICTED: auxin response factor 18-like [Lupinus angustifolius] >OIW20549.1 hypothetical protein TanjilG_14487 [Lupinus angustifolius]
TRINITY_DN10386_c0_g1	BP:regulation of transcription, DNA-templated;CC:nucleus;MF:DNA binding			hypothetical protein GOBAR_AA17876 [Gossypium barbadense]	PF05920	Homeobox KN domain
TRINITY_DN10387_c0_g1	CC:cytosolic small ribosomal subunit;MF:structural constituent of ribosome;BP:maturation of SSU-rRNA from tricistronic rRNA transcript ;MF:RNA binding;BP:translation;CC:ribosome	Ribosome	J:Translation, ribosomal structure and biogenesis	PREDICTED: 40S ribosomal protein S16-like [Lupinus angustifolius] >XP_019445803.1 PREDICTED: 40S ribosomal protein S16-like [Lupinus angustifolius] >OIV94302.1 hypothetical protein TanjilG_19308 [Lupinus angustifolius] >OIW10193.1 hypothetical protein TanjilG_27944 [Lupinus angustifolius]	PF00380	Ribosomal protein S9/S16
TRINITY_DN10387_c0_g2	CC:cytosolic small ribosomal subunit;MF:structural constituent of ribosome;BP:maturation of SSU-rRNA from tricistronic rRNA transcript ;MF:RNA binding;BP:translation;CC:ribosome	Ribosome	J:Translation, ribosomal structure and biogenesis	PREDICTED: 40S ribosomal protein S16 [Lupinus angustifolius] >OIW21693.1 hypothetical protein TanjilG_08096 [Lupinus angustifolius]	PF00380	Ribosomal protein S9/S16
TRINITY_DN10387_c0_g3	CC:cytosolic small ribosomal subunit;MF:structural constituent of ribosome;BP:maturation of SSU-rRNA from tricistronic rRNA transcript ;MF:RNA binding;BP:translation;CC:ribosome	Ribosome	J:Translation, ribosomal structure and biogenesis	PREDICTED: 40S ribosomal protein S16-like [Lupinus angustifolius] >XP_019445803.1 PREDICTED: 40S ribosomal protein S16-like [Lupinus angustifolius] >OIV94302.1 hypothetical protein TanjilG_19308 [Lupinus angustifolius] >OIW10193.1 hypothetical protein TanjilG_27944 [Lupinus angustifolius]	PF00380	Ribosomal protein S9/S16
TRINITY_DN10388_c0_g1			S:Function unknown	PREDICTED: MFP1 attachment factor 1-like [Lupinus angustifolius] >OIW14531.1 hypothetical protein TanjilG_12930 [Lupinus angustifolius]	PF13943	WPP domain
TRINITY_DN10389_c0_g1	CC:integral component of membrane		S:Function unknown	PREDICTED: uncharacterized protein LOC109346790 [Lupinus angustifolius] >OIW12522.1 hypothetical protein TanjilG_04686 [Lupinus angustifolius]
TRINITY_DN103899_c0_g1	MF:L-ascorbate oxidase activity;CC:integral component of membrane;MF:copper ion binding;MF:oxidoreductase activity		Q:Secondary metabolites biosynthesis, transport and catabolism	PREDICTED: monocopper oxidase-like protein SKU5 [Lupinus angustifolius] >OIW09799.1 hypothetical protein TanjilG_32237 [Lupinus angustifolius]
TRINITY_DN1039_c0_g1	BP:centrosome duplication;BP:establishment or maintenance of microtubule cytoskeleton polarity;CC:centrosome;BP:intracellular protein transport;MF:microtubule plus-end binding;CC:cell;CC:spindle pole;BP:spindle organization;BP:microtubule polymerization;CC:kinetochore		S:Function unknown	PREDICTED: protein MOR1-like [Lupinus angustifolius]	PF12348;PF02985	CLASP N terminal;HEAT repeat
TRINITY_DN10390_c0_g1	CC:plasma membrane;MF:GTPase activity;MF:GTP binding	Endocytosis	S:Function unknown	PREDICTED: ras-related protein Rab11A [Lupinus angustifolius] >OIW18122.1 hypothetical protein TanjilG_22320 [Lupinus angustifolius]	PF00071;PF08477;PF00025;PF01926	Ras family;Ras of Complex, Roc, domain of DAPkinase;ADP-ribosylation factor family;50S ribosome-binding GTPase
TRINITY_DN10391_c0_g1	MF:ATP binding	Endocytosis;Protein processing in endoplasmic reticulum;Spliceosome	O:Posttranslational modification, protein turnover, chaperones	PREDICTED: heat shock cognate 70 kDa protein 2-like [Lupinus angustifolius] >OIW05081.1 hypothetical protein TanjilG_06217 [Lupinus angustifolius]	PF00012;PF02782	Hsp70 protein;FGGY family of carbohydrate kinases, C-terminal domain
TRINITY_DN10391_c1_g1	BP:cell morphogenesis;MF:ATP binding	Endocytosis;Protein processing in endoplasmic reticulum;Spliceosome	O:Posttranslational modification, protein turnover, chaperones	Heat shock cognate protein 70-1 isoform 2, partial [Theobroma cacao]	PF00012	Hsp70 protein
TRINITY_DN10392_c0_g1	CC:plastid-encoded plastid RNA polymerase complex;BP:etioplast organization;MF:fructokinase activity;MF:kinase activity;BP:chloroplast organization;BP:regulation of transcription, DNA-templated;CC:chloroplast nucleoid;BP:transcription from plastid promoter		G:Carbohydrate transport and metabolism	PREDICTED: fructokinase-like 2, chloroplastic [Lupinus angustifolius]	PF00294	pfkB family carbohydrate kinase
TRINITY_DN103920_c0_g1			S:Function unknown	PREDICTED: uncharacterized protein LOC109340411 [Lupinus angustifolius] >OIW21698.1 hypothetical protein TanjilG_08101 [Lupinus angustifolius]	PF07279	Protein of unknown function
TRINITY_DN10393_c0_g1	BP:peptidyl-L-cysteine S-palmitoylation;CC:Golgi apparatus;CC:endoplasmic reticulum;MF:hydrolase activity;CC:integral component of membrane;BP:protein targeting to membrane;MF:protein-cysteine S-palmitoyltransferase activity		S:Function unknown	PREDICTED: protein S-acyltransferase 11-like [Lupinus angustifolius]	PF01529	DHHC palmitoyltransferase
TRINITY_DN10394_c0_g1			S:Function unknown;L:Replication, recombination and repair	hypothetical protein TanjilG_11211 [Lupinus angustifolius]
TRINITY_DN10394_c1_g1	MF:nucleotidyltransferase activity		S:Function unknown	hypothetical protein TanjilG_10868 [Lupinus angustifolius]
TRINITY_DN10395_c0_g1	MF:microtubule binding;BP:microtubule-based movement;MF:ATP binding;MF:ATPase activity;CC:kinesin complex;CC:microtubule;MF:microtubule motor activity		Z:Cytoskeleton	hypothetical protein TanjilG_22732 [Lupinus angustifolius]	PF00225;PF16796	Kinesin motor domain;Microtubule binding
TRINITY_DN10396_c0_g1	BP:cellular amino acid metabolic process;MF:carboxy-lyase activity;BP:serotonin biosynthetic process from tryptophan;MF:pyridoxal phosphate binding;MF:L-tryptophan decarboxylase activity;MF:tyrosine decarboxylase activity	Isoquinoline alkaloid biosynthesis;Tyrosine metabolism	E:Amino acid transport and metabolism	hypothetical protein TanjilG_27260 [Lupinus angustifolius]	PF00282	Pyridoxal-dependent decarboxylase conserved domain
TRINITY_DN10396_c0_g3	MF:DNA-directed DNA polymerase activity;MF:RNA-directed DNA polymerase activity;MF:translation elongation factor activity;MF:GTPase activity;MF:GTP binding	RNA transport	S:Function unknown	hypothetical protein KK1_011782 [Cajanus cajan]
TRINITY_DN10396_c0_g4	CC:cytoplasm;BP:cysteine biosynthetic process from serine;CC:cytosol;MF:serine O-acetyltransferase activity	Cysteine and methionine metabolism;Sulfur metabolism	E:Amino acid transport and metabolism	PREDICTED: serine acetyltransferase 1, chloroplastic-like [Lupinus angustifolius] >XP_019460471.1 PREDICTED: serine acetyltransferase 1, chloroplastic-like [Lupinus angustifolius]	PF06426;PF00132;PF14602	Serine acetyltransferase, N-terminal;Bacterial transferase hexapeptide ;Hexapeptide repeat of succinyl-transferase
TRINITY_DN10397_c0_g1	MF:DNA-directed DNA polymerase activity;CC:integral component of membrane		S:Function unknown	hypothetical protein B296_00012660 [Ensete ventricosum]	PF07797	Protein of unknown function
TRINITY_DN10398_c0_g1	MF:transcription factor activity, sequence-specific DNA binding;BP:response to UV-B;BP:response to karrikin	Circadian rhythm - plant	K:Transcription	PREDICTED: transcription factor HY5-like isoform X1 [Lupinus angustifolius] >XP_019450114.1 PREDICTED: transcription factor HY5-like isoform X1 [Lupinus angustifolius] >OIW07553.1 hypothetical protein TanjilG_08440 [Lupinus angustifolius]	PF00170;PF07716	bZIP transcription factor;Basic region leucine zipper
TRINITY_DN10398_c0_g2	MF:transcription factor activity, sequence-specific DNA binding;BP:response to UV-B;BP:response to karrikin		K:Transcription	PREDICTED: transcription factor HY5-like [Lupinus angustifolius] >XP_019461352.1 PREDICTED: transcription factor HY5-like [Lupinus angustifolius] >OIW01275.1 hypothetical protein TanjilG_10436 [Lupinus angustifolius]	PF00170;PF07716;PF03131	bZIP transcription factor;Basic region leucine zipper;bZIP Maf transcription factor
TRINITY_DN103984_c0_g1			S:Function unknown	PREDICTED: uncharacterized protein LOC109355828 [Lupinus angustifolius] >OIW04325.1 hypothetical protein TanjilG_32517 [Lupinus angustifolius]
TRINITY_DN10399_c0_g1			S:Function unknown	PREDICTED: protein ROOT PRIMORDIUM DEFECTIVE 1 [Lupinus angustifolius] >XP_019442075.1 PREDICTED: protein ROOT PRIMORDIUM DEFECTIVE 1 [Lupinus angustifolius] >OIW12550.1 hypothetical protein TanjilG_04714 [Lupinus angustifolius]	PF11955	Plant organelle RNA recognition domain
TRINITY_DN104_c0_g1	BP:regulation of transcription, DNA-templated;CC:membrane;MF:zinc ion binding;MF:acetylglucosaminyltransferase activity		S:Function unknown	PREDICTED: protein FAR1-RELATED SEQUENCE 11 [Lupinus angustifolius] >OIW13595.1 hypothetical protein TanjilG_07937 [Lupinus angustifolius]	PF04434;PF10551	SWIM zinc finger;MULE transposase domain
TRINITY_DN1040_c0_g1	MF:metal ion binding		S:Function unknown;S:Function unknown;S:Function unknown	PREDICTED: zinc finger CCCH domain-containing protein 44-like [Lupinus angustifolius] >OIV94826.1 hypothetical protein TanjilG_22023 [Lupinus angustifolius]	PF02213;PF13771;PF13832	GYF domain;PHD-like zinc-binding domain;PHD-zinc-finger like domain
TRINITY_DN10400_c0_g1	BP:cell redox homeostasis;MF:isomerase activity;CC:cell			hypothetical protein TanjilG_01194 [Lupinus angustifolius]
TRINITY_DN10400_c1_g1	CC:integral component of membrane;MF:transferase activity;MF:amidase activity		J:Translation, ribosomal structure and biogenesis	PREDICTED: fatty acid amide hydrolase-like [Lupinus angustifolius] >OIW18144.1 hypothetical protein TanjilG_31264 [Lupinus angustifolius]	PF01425	Amidase
TRINITY_DN10401_c0_g1	MF:transmembrane transporter activity;CC:integral component of membrane;CC:plasma membrane		S:Function unknown	PREDICTED: WAT1-related protein At4g08290-like [Lupinus angustifolius]	PF00892	EamA-like transporter family
TRINITY_DN104012_c0_g1			K:Transcription	PREDICTED: uncharacterized protein LOC109341846, partial [Lupinus angustifolius]
TRINITY_DN10402_c0_g1	MF:hydrolase activity;CC:integral component of membrane;MF:ligase activity;MF:zinc ion binding;CC:plasma membrane		O:Posttranslational modification, protein turnover, chaperones	PREDICTED: E3 ubiquitin-protein ligase At1g63170-like [Lupinus angustifolius] >XP_019414913.1 PREDICTED: E3 ubiquitin-protein ligase At1g63170-like [Lupinus angustifolius] >OIV97755.1 hypothetical protein TanjilG_12512 [Lupinus angustifolius]	PF13639;PF17123;PF12678;PF13923;PF00097;PF14634;PF13445	Ring finger domain;RING-like zinc finger;RING-H2 zinc finger domain;Zinc finger, C3HC4 type ;Zinc finger, C3HC4 type ;zinc-RING finger domain;RING-type zinc-finger
TRINITY_DN10403_c0_g1	MF:L-ornithine transmembrane transporter activity;BP:mitochondrial L-ornithine transmembrane transport;CC:integral component of membrane		S:Function unknown	PREDICTED: mitochondrial arginine transporter BAC1 [Lupinus angustifolius] >OIV92227.1 hypothetical protein TanjilG_31146 [Lupinus angustifolius]	PF00153	Mitochondrial carrier protein
TRINITY_DN10404_c0_g1	BP:regulation of amino acid export;CC:integral component of membrane		S:Function unknown;U:Intracellular trafficking, secretion, and vesicular transport	PREDICTED: protein GLUTAMINE DUMPER 6-like isoform X1 [Lupinus angustifolius] >OIW21710.1 hypothetical protein TanjilG_08396 [Lupinus angustifolius]
TRINITY_DN10404_c0_g2	BP:regulation of amino acid export;CC:integral component of membrane		S:Function unknown	hypothetical protein TanjilG_23270 [Lupinus angustifolius]
TRINITY_DN104054_c0_g1	MF:catalytic activity;MF:DNA-directed RNA polymerase activity;CC:RNA polymerase complex;BP:DNA-templated transcription, initiation;MF:nucleotide binding	Pyrimidine metabolism;RNA polymerase;Purine metabolism	K:Transcription	PREDICTED: DNA-directed RNA polymerase II subunit 4 [Erythranthe guttata] >EYU36013.1 hypothetical protein MIMGU_mgv1a015994mg [Erythranthe guttata]	PF03874	RNA polymerase Rpb4
TRINITY_DN10406_c0_g1	CC:integral component of membrane;MF:molybdate ion transmembrane transporter activity		P:Inorganic ion transport and metabolism	PREDICTED: molybdate transporter 2 isoform X1 [Lupinus angustifolius] >OIW11911.1 hypothetical protein TanjilG_18184 [Lupinus angustifolius]	PF16983;PF00916	Molybdate transporter of MFS superfamily;Sulfate permease family
TRINITY_DN10407_c0_g1			S:Function unknown	PREDICTED: UPF0161 protein At3g09310 isoform X1 [Lupinus angustifolius] >OIW01012.1 hypothetical protein TanjilG_14195 [Lupinus angustifolius]	PF01809	Putative membrane protein insertion efficiency factor
TRINITY_DN10407_c1_g1	CC:integral component of membrane		E:Amino acid transport and metabolism	hypothetical protein TanjilG_20972 [Lupinus angustifolius]	PF01490	Transmembrane amino acid transporter protein
TRINITY_DN104075_c0_g1
TRINITY_DN10408_c0_g1	MF:ATPase activity, coupled to transmembrane movement of substances;CC:integral component of membrane;MF:ATPase activity;MF:ATP binding;CC:plasma membrane	ABC transporters	S:Function unknown	PREDICTED: ABC transporter B family member 4-like [Lupinus angustifolius] >XP_019464438.1 PREDICTED: ABC transporter B family member 4-like [Lupinus angustifolius] >XP_019464439.1 PREDICTED: ABC transporter B family member 4-like [Lupinus angustifolius] >OIW00186.1 hypothetical protein TanjilG_29176 [Lupinus angustifolius]	PF00664;PF00005;PF02463;PF13555;PF13191;PF06414;PF00270	ABC transporter transmembrane region;ABC transporter;RecF/RecN/SMC N terminal domain;P-loop containing region of AAA domain;AAA ATPase domain;Zeta toxin;DEAD/DEAH box helicase
TRINITY_DN10409_c0_g1			S:Function unknown	PREDICTED: uncharacterized protein LOC109347979 [Lupinus angustifolius] >OIW11703.1 hypothetical protein TanjilG_12222 [Lupinus angustifolius]	PF04788	Protein of unknown function
TRINITY_DN1041_c0_g1			S:Function unknown	hypothetical protein TanjilG_05044 [Lupinus angustifolius]	PF00514	Armadillo/beta-catenin-like repeat
TRINITY_DN10410_c0_g1	MF:sequence-specific DNA binding;CC:nucleus;MF:lipid binding;BP:regulation of transcription, DNA-templated		K:Transcription	PREDICTED: homeobox-leucine zipper protein HDG12-like [Lupinus angustifolius] >OIV89310.1 hypothetical protein TanjilG_23724 [Lupinus angustifolius]	PF00046;PF05920;PF01852	Homeodomain;Homeobox KN domain;START domain
TRINITY_DN10411_c0_g2	CC:chloroplast stroma;CC:integral component of membrane;MF:ATP binding		S:Function unknown	hypothetical chloroplast RF2	PF05695	Plant protein of unknown function
TRINITY_DN10412_c0_g1	BP:DNA repair;CC:cytosol;MF:damaged DNA binding;BP:programmed cell death;MF:DNA binding;CC:nucleus		S:Function unknown	PREDICTED: DNA-binding protein DDB_G0278111 isoform X1 [Gossypium raimondii] >XP_016697099.1 PREDICTED: DNA-binding protein DDB_G0278111-like isoform X1 [Gossypium hirsutum] >KJB68844.1 hypothetical protein B456_011G041300 [Gossypium raimondii]	PF01984	Double-stranded DNA-binding domain
TRINITY_DN104125_c0_g1	BP:protein folding;CC:cell wall;BP:response to virus;MF:unfolded protein binding;CC:vacuolar membrane;CC:mitochondrion;BP:response to salt stress;BP:response to cadmium ion;BP:response to heat;MF:ATP binding;CC:chloroplast	Endocytosis;Protein processing in endoplasmic reticulum;Spliceosome		heat shock 70 kDa protein, mitochondrial isoform X2 [Carica papaya]	PF00012	Hsp70 protein
TRINITY_DN10413_c1_g1	BP:ribosome biogenesis		A:RNA processing and modification	PREDICTED: FIP1[V]-like protein isoform X3 [Lupinus angustifolius]	PF05182	Fip1 motif
TRINITY_DN104131_c0_g1	CC:ribosome;CC:cytosolic large ribosomal subunit;MF:rRNA binding;MF:structural constituent of ribosome;MF:metal ion binding;BP:translation;MF:mRNA binding	Ribosome	J:Translation, ribosomal structure and biogenesis	predicted protein [Hordeum vulgare subsp. vulgare]	PF01907	Ribosomal protein L37e
TRINITY_DN104135_c0_g1	MF:structural constituent of ribosome;BP:maturation of LSU-rRNA from tricistronic rRNA transcript ;CC:cytosolic large ribosomal subunit	Ribosome	J:Translation, ribosomal structure and biogenesis	predicted protein, partial [Hordeum vulgare subsp. vulgare]	PF00327;PF08079	Ribosomal protein L30p/L7e;Ribosomal L30 N-terminal domain
TRINITY_DN104136_c0_g1	MF:structural constituent of ribosome;BP:translation;CC:ribosome	Ribosome	S:Function unknown	predicted protein [Hordeum vulgare subsp. vulgare]	PF01775	Ribosomal proteins 50S-L18Ae/60S-L20/60S-L18A
TRINITY_DN10414_c0_g1	CC:mitochondrial matrix;MF:transferase activity, transferring acyl groups, acyl groups converted into alkyl on transfer;BP:tricarboxylic acid cycle;MF:citrate ;BP:carbohydrate metabolic process	Citrate cycle ;Glyoxylate and dicarboxylate metabolism	C:Energy production and conversion	PREDICTED: citrate synthase, glyoxysomal-like [Lupinus angustifolius] >XP_019461239.1 PREDICTED: citrate synthase, glyoxysomal-like [Lupinus angustifolius]	PF00285	Citrate synthase, C-terminal domain
TRINITY_DN104147_c0_g1	CC:mitochondrion			hypothetical protein GlmaxMp29
TRINITY_DN10415_c0_g1	MF:6-phosphogluconolactonase activity;BP:pentose-phosphate shunt;BP:carbohydrate metabolic process	Pentose phosphate pathway	G:Carbohydrate transport and metabolism	PREDICTED: probable 6-phosphogluconolactonase 1 [Lupinus angustifolius] >XP_019428728.1 PREDICTED: probable 6-phosphogluconolactonase 1 [Lupinus angustifolius] >OIW16796.1 hypothetical protein TanjilG_01361 [Lupinus angustifolius]	PF01182	Glucosamine-6-phosphate isomerases/6-phosphogluconolactonase
TRINITY_DN104150_c0_g1	MF:RNA-directed DNA polymerase activity;MF:nucleotidyltransferase activity;MF:nucleic acid binding;MF:RNA-DNA hybrid ribonuclease activity;MF:zinc ion binding		J:Translation, ribosomal structure and biogenesis;S:Function unknown	hypothetical protein POPTR_T126300 [Populus trichocarpa]	PF17917;PF17919	RNase H-like domain found in reverse transcriptase;RNase H-like domain found in reverse transcriptase
TRINITY_DN104159_c0_g1	MF:NADH dehydrogenase ;CC:integral component of membrane;CC:mitochondrion;CC:mitochondrial membrane;CC:mitochondrial respiratory chain complex I;CC:respiratory chain;CC:NADH dehydrogenase complex	Oxidative phosphorylation	J:Translation, ribosomal structure and biogenesis	NADH dehydrogenase subunit 4	PF00507	NADH-ubiquinone/plastoquinone oxidoreductase, chain 3
TRINITY_DN104162_c0_g1	CC:phosphopyruvate hydratase complex;MF:magnesium ion binding;MF:phosphopyruvate hydratase activity;BP:glycolytic process	RNA degradation;Glycolysis / Gluconeogenesis	J:Translation, ribosomal structure and biogenesis	PREDICTED: enolase-like [Lupinus angustifolius]	PF00113;PF07476;PF13378	Enolase, C-terminal TIM barrel domain;Methylaspartate ammonia-lyase C-terminus;Enolase C-terminal domain-like
TRINITY_DN104164_c0_g1	MF:structural constituent of ribosome;CC:ribosome;CC:cytosolic large ribosomal subunit;BP:translation;BP:ribosomal large subunit assembly	Ribosome	J:Translation, ribosomal structure and biogenesis	60S ribosomal protein L10a [Glycine max] >XP_027335407.1 60S ribosomal protein L10a-like [Abrus precatorius] >XP_027335408.1 60S ribosomal protein L10a-like [Abrus precatorius] >XP_028191991.1 60S ribosomal protein L10a-like [Glycine soja] >ACU16844.1 unknown, partial [Glycine max] >KHN32874.1 60S ribosomal protein L10a-1 [Glycine soja] >KRH22676.1 hypothetical protein GLYMA_13G316400 [Glycine ma…	PF00252	Ribosomal protein L16p/L10e
TRINITY_DN10417_c0_g1	BP:cell wall modification;MF:enzyme inhibitor activity;BP:pectin catabolic process;MF:pectinesterase activity;MF:aspartyl esterase activity		G:Carbohydrate transport and metabolism	PREDICTED: probable pectinesterase/pectinesterase inhibitor 51 [Lupinus angustifolius] >OIW18171.1 hypothetical protein TanjilG_31291 [Lupinus angustifolius]	PF04043	Plant invertase/pectin methylesterase inhibitor
TRINITY_DN104175_c0_g1	CC:retrotransposon nucleocapsid;MF:transcription cofactor activity;BP:DNA integration;BP:regulation of transcription from RNA polymerase II promoter;MF:nucleic acid binding;MF:RNA-directed DNA polymerase activity;CC:mediator complex		L:Replication, recombination and repair	PREDICTED: uncharacterized protein LOC109337252 [Lupinus angustifolius]
TRINITY_DN104176_c0_g1	MF:structural constituent of ribosome;CC:cytosolic small ribosomal subunit;BP:translation;CC:ribosome	Ribosome	J:Translation, ribosomal structure and biogenesis	40S ribosomal protein S11-like [Papaver somniferum] >XP_026380659.1 40S ribosomal protein S11-like [Papaver somniferum] >XP_026386992.1 40S ribosomal protein S11-like [Papaver somniferum] >XP_026393293.1 40S ribosomal protein S11-like [Papaver somniferum] >RZC44309.1 hypothetical protein C5167_037255 [Papaver somniferum] >RZC61413.1 hypothetical protein C5167_023172 [Papaver somniferum] >RZC66211…	PF16205;PF00366	Ribosomal_S17 N-terminal;Ribosomal protein S17
TRINITY_DN10418_c0_g1	MF:RNA binding	Spliceosome	S:Function unknown	hypothetical protein TanjilG_32153 [Lupinus angustifolius]
TRINITY_DN104183_c0_g1	CC:cytoplasm;BP:regulation of cyclin-dependent protein serine/threonine kinase activity;BP:protein phosphorylation;CC:centrosome;CC:nucleus;MF:protein kinase binding;MF:cyclin-dependent protein serine/threonine kinase regulator activity;BP:mitotic cell cycle phase transition;BP:cell surface receptor signaling pathway;MF:ubiquitin-protein transferase activity;CC:cyclin-dependent protein kinase hol…		L:Replication, recombination and repair	unnamed protein product [Brassica rapa]	PF00134;PF02984	Cyclin, N-terminal domain;Cyclin, C-terminal domain
TRINITY_DN104188_c0_g1	CC:cytoplasm;BP:protein phosphorylation;BP:regulation of cyclin-dependent protein serine/threonine kinase activity;MF:protein kinase binding;MF:cyclin-dependent protein serine/threonine kinase regulator activity;BP:mitotic cell cycle phase transition;CC:nucleus;CC:cyclin-dependent protein kinase holoenzyme complex;BP:cell division		S:Function unknown	cyclin-C1-2-like [Cicer arietinum] >XP_004515041.1 cyclin-C1-2-like [Cicer arietinum]	PF00134;PF02984	Cyclin, N-terminal domain;Cyclin, C-terminal domain
TRINITY_DN104189_c0_g1	CC:ribosome;CC:cytosolic large ribosomal subunit;MF:structural constituent of ribosome;MF:RNA binding;BP:cytoplasmic translation;BP:translation;BP:ribosomal large subunit assembly	Ribosome	J:Translation, ribosomal structure and biogenesis	PREDICTED: 60S ribosomal protein L6-1-like [Tarenaya hassleriana]	PF01159	Ribosomal protein L6e
TRINITY_DN10419_c0_g1	MF:structural constituent of ribosome;CC:cytosolic large ribosomal subunit;BP:translation;CC:ribosome	Ribosome	J:Translation, ribosomal structure and biogenesis	PREDICTED: 60S ribosomal protein L44 [Lupinus angustifolius] >XP_019447393.1 PREDICTED: 60S ribosomal protein L44 [Lupinus angustifolius] >XP_019457261.1 PREDICTED: 60S ribosomal protein L44 [Lupinus angustifolius] >XP_019425375.1 PREDICTED: 60S ribosomal protein L44 [Lupinus angustifolius] >XP_019440377.1 PREDICTED: 60S ribosomal protein L44 [Lupinus angustifolius] >OIV91563.1 hypothetical prote…	PF00935	Ribosomal protein L44
TRINITY_DN10419_c1_g1	MF:structural constituent of ribosome;BP:translation;CC:ribosome	Ribosome	J:Translation, ribosomal structure and biogenesis	PREDICTED: 60S ribosomal protein L44 [Lupinus angustifolius] >XP_019447393.1 PREDICTED: 60S ribosomal protein L44 [Lupinus angustifolius] >XP_019457261.1 PREDICTED: 60S ribosomal protein L44 [Lupinus angustifolius] >XP_019425375.1 PREDICTED: 60S ribosomal protein L44 [Lupinus angustifolius] >XP_019440377.1 PREDICTED: 60S ribosomal protein L44 [Lupinus angustifolius] >OIV91563.1 hypothetical prote…	PF00935	Ribosomal protein L44
TRINITY_DN104191_c0_g1	CC:ribosome;CC:cytosolic large ribosomal subunit;MF:rRNA binding;MF:structural constituent of ribosome;MF:metal ion binding;BP:translation	Ribosome	J:Translation, ribosomal structure and biogenesis	unknown [Picea sitchensis] >ABK21439.1 unknown [Picea sitchensis]	PF01907	Ribosomal protein L37e
TRINITY_DN104192_c0_g1	MF:small ribosomal subunit rRNA binding;CC:ribosome;BP:ribosomal small subunit assembly;MF:structural constituent of ribosome;BP:maturation of SSU-rRNA from tricistronic rRNA transcript ;MF:mRNA 5'-UTR binding;BP:translation;CC:cytosolic small ribosomal subunit	Ribosome	S:Function unknown	PREDICTED: 40S ribosomal protein S14-like [Nelumbo nucifera]	PF00411	Ribosomal protein S11
TRINITY_DN1042_c0_g1	CC:integral component of membrane		S:Function unknown	hypothetical protein TanjilG_09255 [Lupinus angustifolius]
TRINITY_DN1042_c0_g2	CC:integral component of membrane		S:Function unknown	hypothetical protein TanjilG_09266 [Lupinus angustifolius]	PF03168	Late embryogenesis abundant protein
TRINITY_DN1042_c1_g1	CC:integral component of membrane		S:Function unknown	hypothetical protein TanjilG_09255 [Lupinus angustifolius]
TRINITY_DN1042_c1_g2	CC:integral component of membrane		S:Function unknown	PREDICTED: NDR1/HIN1-Like protein 3-like [Lupinus angustifolius] >OIV97898.1 hypothetical protein TanjilG_12655 [Lupinus angustifolius]	PF03168	Late embryogenesis abundant protein
TRINITY_DN10420_c0_g1			S:Function unknown	PREDICTED: protein IQ-DOMAIN 14-like [Lupinus angustifolius] >XP_019446388.1 PREDICTED: protein IQ-DOMAIN 14-like [Lupinus angustifolius] >XP_019446389.1 PREDICTED: protein IQ-DOMAIN 14-like [Lupinus angustifolius] >XP_019446390.1 PREDICTED: protein IQ-DOMAIN 14-like [Lupinus angustifolius] >XP_019446391.1 PREDICTED: protein IQ-DOMAIN 14-like [Lupinus angustifolius] >XP_019446392.1 PREDICTED: pro…	PF13178	Protein of unknown function
TRINITY_DN10420_c0_g2			S:Function unknown	hypothetical protein TanjilG_05916 [Lupinus angustifolius]	PF13178;PF00612	Protein of unknown function ;IQ calmodulin-binding motif
TRINITY_DN104207_c0_g1	MF:UDP-arabinopyranose mutase activity;BP:plant-type cell wall biogenesis;MF:transferase activity, transferring glycosyl groups;CC:Golgi apparatus;CC:cytosol;BP:UDP-L-arabinose metabolic process;MF:intramolecular transferase activity;CC:plasmodesma;BP:plant-type cell wall organization or biogenesis			UDP-arabinopyranose mutase 1 [Apostasia shenzhenica]	PF03214	Reversibly glycosylated polypeptide
TRINITY_DN10421_c0_g1	MF:peptide-methionine ;CC:chloroplast stroma;MF:metal ion binding;BP:response to oxidative stress;BP:protein repair		S:Function unknown	PREDICTED: uncharacterized protein LOC109351967 isoform X2 [Lupinus angustifolius] >OIW08192.1 hypothetical protein TanjilG_26481 [Lupinus angustifolius]	PF01641	SelR domain
TRINITY_DN10421_c1_g1	MF:RNA-directed DNA polymerase activity;CC:integral component of membrane		S:Function unknown;S:Function unknown;S:Function unknown	PREDICTED: uncharacterized protein LOC109329191 [Lupinus angustifolius]	PF13966	zinc-binding in reverse transcriptase
TRINITY_DN104214_c0_g1	CC:retrotransposon nucleocapsid;MF:RNA-directed DNA polymerase activity;MF:nucleic acid binding;BP:DNA integration			PREDICTED: uncharacterized protein LOC109350428 [Lupinus angustifolius]
TRINITY_DN104215_c0_g1	CC:integral component of membrane		S:Function unknown	PREDICTED: NDR1/HIN1-Like protein 3-like [Lupinus angustifolius] >OIW18219.1 hypothetical protein TanjilG_31339 [Lupinus angustifolius]
TRINITY_DN10422_c0_g1	MF:calcium ion binding;BP:calcium-mediated signaling	Plant-pathogen interaction	D:Cell cycle control, cell division, chromosome partitioning;T:Signal transduction mechanisms;Z:Cytoskeleton	PREDICTED: probable calcium-binding protein CML18 [Lupinus angustifolius] >XP_019446719.1 PREDICTED: probable calcium-binding protein CML18 [Lupinus angustifolius] >XP_019447674.1 PREDICTED: probable calcium-binding protein CML18 [Lupinus angustifolius] >XP_019447675.1 PREDICTED: probable calcium-binding protein CML18 [Lupinus angustifolius] >OIW09774.1 hypothetical protein TanjilG_32212 [Lupinus…	PF00036;PF13499;PF13405;PF13833;PF13202;PF10591;PF14658;PF12763	EF hand;EF-hand domain pair;EF-hand domain;EF-hand domain pair;EF hand;Secreted protein acidic and rich in cysteine Ca binding region;EF-hand domain;Cytoskeletal-regulatory complex EF hand
TRINITY_DN104222_c0_g1	MF:structural constituent of ribosome;CC:cytosolic large ribosomal subunit;BP:translation;CC:ribosome	Ribosome	L:Replication, recombination and repair	Ribosomal protein [Parasponia andersonii] >PON96107.1 Ribosomal protein [Trema orientale]	PF01778	Ribosomal L28e protein family
TRINITY_DN104223_c0_g1	MF:structural constituent of ribosome;MF:5S rRNA binding;CC:nucleus;BP:translation;CC:ribosome	Ribosome	C:Energy production and conversion	RecName: Full=60S ribosomal protein L5 >AAC17448.1 RPL5A-related protein [Helianthus annuus]	PF17144;PF14204	Ribosomal large subunit proteins 60S L5, and 50S L18;Ribosomal L18 C-terminal region
TRINITY_DN104226_c0_g1	CC:nucleus;BP:nucleoside triphosphate catabolic process;BP:DNA integration;MF:aspartic-type endopeptidase activity;MF:zinc ion binding;MF:nucleic acid binding;MF:nucleoside-triphosphate diphosphatase activity		L:Replication, recombination and repair	retrotransposon-related protein [Trifolium pratense]	PF00665;PF00385	Integrase core domain;Chromo
TRINITY_DN104227_c0_g1	BP:protein ubiquitination;CC:integral component of membrane;MF:ubiquitin protein ligase binding		S:Function unknown	PREDICTED: E3 ubiquitin-protein ligase ATL4-like [Lupinus angustifolius] >OIW17631.1 hypothetical protein TanjilG_28981 [Lupinus angustifolius]	PF13639;PF17123;PF12678;PF13923;PF00097;PF13445;PF12861;PF14634	Ring finger domain;RING-like zinc finger;RING-H2 zinc finger domain;Zinc finger, C3HC4 type ;Zinc finger, C3HC4 type ;RING-type zinc-finger;Anaphase-promoting complex subunit 11 RING-H2 finger;zinc-RING finger domain
TRINITY_DN10423_c0_g1			S:Function unknown	PREDICTED: uncharacterized protein DDB_G0271670-like [Lupinus angustifolius] >OIW00015.1 hypothetical protein TanjilG_26352 [Lupinus angustifolius]
TRINITY_DN10423_c1_g1	CC:nucleus			hypothetical protein TanjilG_13660 [Lupinus angustifolius]
TRINITY_DN104231_c0_g1	BP:positive regulation of translational termination;BP:positive regulation of translational elongation;BP:translational frameshifting;MF:translation elongation factor activity;MF:ribosome binding;MF:translation initiation factor activity		L:Replication, recombination and repair	PREDICTED: eukaryotic translation initiation factor 5A-3 [Brassica rapa]	PF01287;PF08207	Eukaryotic elongation factor 5A hypusine, DNA-binding OB fold;Elongation factor P
TRINITY_DN104236_c0_g1	MF:NADH dehydrogenase ;CC:integral component of membrane;CC:mitochondrion;CC:mitochondrial membrane;CC:respiratory chain;BP:ATP synthesis coupled electron transport	Oxidative phosphorylation	C:Energy production and conversion	uncharacterized protein LOC112005410 [Quercus suber] >BAW99863.1 NADH dehydrogenase subunit 4	PF00361;PF01059	Proton-conducting membrane transporter;NADH-ubiquinone oxidoreductase chain 4, amino terminus
TRINITY_DN10424_c0_g1	CC:cell wall;MF:hydrolase activity;CC:extracellular region;MF:phosphoprotein phosphatase activity;BP:cell wall organization	mRNA surveillance pathway	T:Signal transduction mechanisms	hypothetical protein Ahy_Scaffold6g108188 isoform A [Arachis hypogaea]
TRINITY_DN10424_c0_g2	MF:phosphoprotein phosphatase activity	mRNA surveillance pathway	T:Signal transduction mechanisms	PREDICTED: serine/threonine-protein phosphatase PP2A-2 catalytic subunit isoform X1 [Gossypium arboreum]
TRINITY_DN104241_c0_g1	CC:cytoplasm;MF:calcium ion binding		J:Translation, ribosomal structure and biogenesis	translationally-controlled tumor protein homolog [Quercus suber]	PF00838	Translationally controlled tumour protein
TRINITY_DN104243_c0_g1	MF:monooxygenase activity;MF:ribulose-bisphosphate carboxylase activity;BP:photorespiration;BP:carbon fixation;BP:photosynthesis;BP:reductive pentose-phosphate cycle;CC:chloroplast	Glyoxylate and dicarboxylate metabolism;Carbon fixation in photosynthetic organisms	J:Translation, ribosomal structure and biogenesis	PREDICTED: ribulose bisphosphate carboxylase small chain, chloroplastic [Vitis vinifera] >CAN64291.1 hypothetical protein VITISV_022329 [Vitis vinifera] >RVX14211.1 Ribulose bisphosphate carboxylase small chain, chloroplastic [Vitis vinifera]	PF00101;PF12338	Ribulose bisphosphate carboxylase, small chain;Ribulose-1,5-bisphosphate carboxylase small subunit
TRINITY_DN104245_c0_g1	MF:voltage-gated chloride channel activity;CC:integral component of membrane		L:Replication, recombination and repair	PREDICTED: chloride channel protein CLC-b-like isoform X1 [Lupinus angustifolius]	PF00654	Voltage gated chloride channel
TRINITY_DN104249_c0_g1			S:Function unknown	PREDICTED: uncharacterized protein LOC109335693 [Lupinus angustifolius]
TRINITY_DN10425_c0_g1		Mismatch repair;Homologous recombination;Nucleotide excision repair;DNA replication	S:Function unknown	PREDICTED: uncharacterized protein At4g28440-like [Lupinus angustifolius] >XP_019432125.1 PREDICTED: uncharacterized protein At4g28440-like [Lupinus angustifolius] >OIW20996.1 hypothetical protein TanjilG_27341 [Lupinus angustifolius]
TRINITY_DN104255_c0_g1	MF:structural constituent of ribosome;MF:metal ion binding;CC:cytosolic large ribosomal subunit;BP:translation;CC:ribosome	Ribosome	J:Translation, ribosomal structure and biogenesis	predicted protein [Hordeum vulgare subsp. vulgare]	PF01780	Ribosomal L37ae protein family
TRINITY_DN104257_c0_g1	CC:cytoplasm;CC:nucleus;MF:metal ion binding;MF:protein serine/threonine phosphatase activity;MF:phosphoprotein phosphatase activity	mRNA surveillance pathway	L:Replication, recombination and repair;L:Replication, recombination and repair	PREDICTED: serine/threonine-protein phosphatase PP1 isoform X1 [Pyrus x bretschneideri] >OWY42135.1 Metallo-dependent phosphatase [Alternaria alternata] >RYN62563.1 Serine/threonine-protein phosphatase [Alternaria tenuissima] >RYN87799.1 Serine/threonine-protein phosphatase [Alternaria tenuissima] >RYO61140.1 Serine/threonine-protein phosphatase [Alternaria tenuissima]	PF16891;PF00149	Serine-threonine protein phosphatase N-terminal domain;Calcineurin-like phosphoesterase
TRINITY_DN10426_c0_g1	CC:integral component of membrane		S:Function unknown	PREDICTED: tobamovirus multiplication protein 2A-like [Lupinus angustifolius] >OIV93421.1 hypothetical protein TanjilG_02958 [Lupinus angustifolius]	PF00335	Tetraspanin family
TRINITY_DN104260_c0_g1	MF:metal ion binding;BP:protein folding;BP:chaperone mediated protein folding requiring cofactor;MF:chaperone binding;MF:unfolded protein binding;CC:mitochondrion;CC:mitochondrial matrix;BP:response to heat;MF:copper ion binding;MF:ATP binding		J:Translation, ribosomal structure and biogenesis	unknown [Picea sitchensis] >ACN40685.1 unknown [Picea sitchensis]	PF00166	Chaperonin 10 Kd subunit
TRINITY_DN104261_c0_g1	CC:ribosome		L:Replication, recombination and repair	guanine nucleotide-binding protein subunit beta-like protein [Quercus suber]	PF00400	WD domain, G-beta repeat
TRINITY_DN104269_c0_g1	MF:structural constituent of ribosome;BP:translation;CC:ribosome	Ribosome	J:Translation, ribosomal structure and biogenesis	PREDICTED: 40S ribosomal protein S7 [Daucus carota subsp. sativus] >KZM88838.1 hypothetical protein DCAR_025913 [Daucus carota subsp. sativus]	PF01251	Ribosomal protein S7e
TRINITY_DN10427_c0_g1	BP:defense response;MF:signaling receptor activity;BP:abscisic acid-activated signaling pathway;MF:protein phosphatase inhibitor activity;MF:abscisic acid binding		S:Function unknown	PREDICTED: MLP-like protein 423 [Lupinus angustifolius] >OIW10549.1 hypothetical protein TanjilG_15921 [Lupinus angustifolius]	PF00407;PF10604	Pathogenesis-related protein Bet v I family;Polyketide cyclase / dehydrase and lipid transport
TRINITY_DN10427_c2_g1				PREDICTED: transcription initiation factor TFIID subunit 13-like [Lupinus angustifolius] >XP_019426678.1 PREDICTED: transcription initiation factor TFIID subunit 13-like [Lupinus angustifolius]	PF02269	Transcription initiation factor IID, 18kD subunit
TRINITY_DN104270_c0_g1	MF:oxidoreductase activity;MF:gibberellin-44 dioxygenase activity;MF:metal ion binding;MF:ent-kaurene synthase activity		J:Translation, ribosomal structure and biogenesis	PREDICTED: gibberellin 20 oxidase 2-like [Lupinus angustifolius]	PF03171;PF14226	2OG-Fe;non-haem dioxygenase in morphine synthesis N-terminal
TRINITY_DN104278_c0_g1	MF:glucan endo-1,3-beta-glucanase activity, C-3 substituted reducing group		P:Inorganic ion transport and metabolism	PREDICTED: probable endo-1,3	PF03639	Glycosyl hydrolase family 81 N-terminal domain
TRINITY_DN10428_c0_g1			K:Transcription	PREDICTED: protein BASIC PENTACYSTEINE6-like [Lupinus angustifolius] >XP_019438046.1 PREDICTED: protein BASIC PENTACYSTEINE6-like [Lupinus angustifolius] >XP_019438047.1 PREDICTED: protein BASIC PENTACYSTEINE6-like [Lupinus angustifolius] >XP_019438048.1 PREDICTED: protein BASIC PENTACYSTEINE6-like [Lupinus angustifolius] >XP_019438049.1 PREDICTED: protein BASIC PENTACYSTEINE6-like [Lupinus angus…	PF06217	GAGA binding protein-like family
TRINITY_DN104285_c0_g1	CC:cytoplasm;MF:RNA 7-methylguanosine cap binding;CC:eukaryotic translation initiation factor 4F complex;MF:translation initiation factor activity	RNA transport	J:Translation, ribosomal structure and biogenesis	Eukaryotic translation initiation factor 4G isoform C [Glycine soja]	PF01652	Eukaryotic initiation factor 4E
TRINITY_DN104286_c0_g1				hypothetical protein CARUB_v10014464mg [Capsella rubella]
TRINITY_DN10429_c0_g1	MF:dioxygenase activity;MF:oxidoreductase activity		S:Function unknown	hypothetical protein TanjilG_11502 [Lupinus angustifolius]
TRINITY_DN104291_c0_g1	MF:transferase activity, transferring acyl groups;MF:ubiquitin activating enzyme activity;MF:ubiquitin protein ligase activity			PREDICTED: E3 ubiquitin-protein ligase CIP8-like isoform X1 [Lupinus angustifolius] >OIW06803.1 hypothetical protein TanjilG_11528 [Lupinus angustifolius]
TRINITY_DN104292_c0_g1				hypothetical protein TanjilG_19397 [Lupinus angustifolius]
TRINITY_DN104298_c0_g1	CC:mitochondrion;BP:protein folding;MF:isomerase activity;CC:cell wall;CC:endoplasmic reticulum lumen;CC:nucleus;CC:cell;CC:vacuolar membrane;CC:extracellular region;MF:protein disulfide isomerase activity;BP:cell redox homeostasis;CC:chloroplast;CC:endoplasmic reticulum;BP:response to oxidative stress;BP:response to endoplasmic reticulum stress	Protein processing in endoplasmic reticulum	B:Chromatin structure and dynamics;D:Cell cycle control, cell division, chromosome partitioning;L:Replication, recombination and repair;T:Signal transduction mechanisms;U:Intracellular trafficking, secretion, and vesicular transport	PREDICTED: protein disulfide isomerase-like 1-4 [Camelina sativa]	PF00085;PF13899;PF13098	Thioredoxin;Thioredoxin-like;Thioredoxin-like domain
TRINITY_DN1043_c0_g1	MF:sucrose synthase activity;CC:cytosol;CC:integral component of membrane;BP:sucrose metabolic process;MF:sucrose-phosphate synthase activity;CC:plasma membrane;MF:voltage-gated chloride channel activity;BP:nectar secretion;CC:plasmodesma	Starch and sucrose metabolism	M:Cell wall/membrane/envelope biogenesis	PREDICTED: probable sucrose-phosphate synthase [Lupinus angustifolius] >OIW18596.1 hypothetical protein TanjilG_13348 [Lupinus angustifolius]	PF00534;PF13692;PF05116;PF00862;PF13439;PF13579	Glycosyl transferases group 1;Glycosyl transferases group 1;Sucrose-6F-phosphate phosphohydrolase;Sucrose synthase;Glycosyltransferase Family 4;Glycosyl transferase 4-like domain
TRINITY_DN10430_c0_g1	MF:transferase activity;CC:oligosaccharyltransferase complex;CC:integral component of membrane;MF:transferase activity, transferring glycosyl groups;BP:protein N-linked glycosylation	N-Glycan biosynthesis;Protein processing in endoplasmic reticulum		dolichyl-phosphate-mannose-protein mannosyltransferase [Vigna unguiculata]	PF05817	Oligosaccharyltransferase subunit Ribophorin II
TRINITY_DN10431_c0_g1	CC:integral component of membrane		S:Function unknown	PREDICTED: uncharacterized protein LOC109349844 [Lupinus angustifolius]
TRINITY_DN10431_c0_g2	CC:integral component of membrane		S:Function unknown	hypothetical protein TanjilG_32718 [Lupinus angustifolius]
TRINITY_DN104316_c0_g1	MF:L-lactate dehydrogenase activity;CC:cytoplasm;BP:carbohydrate metabolic process;BP:carboxylic acid metabolic process	Glycolysis / Gluconeogenesis;Propanoate metabolism;Pyruvate metabolism;Cysteine and methionine metabolism	U:Intracellular trafficking, secretion, and vesicular transport	PREDICTED: L-lactate dehydrogenase B-like [Nicotiana sylvestris] >XP_018625758.1 PREDICTED: L-lactate dehydrogenase B-like isoform X2 [Nicotiana tomentosiformis]	PF00056;PF02866	lactate/malate dehydrogenase, NAD binding domain;lactate/malate dehydrogenase, alpha/beta C-terminal domain
TRINITY_DN104319_c0_g1	BP:iron-sulfur cluster assembly		S:Function unknown	UPF0051 protein ABCI8, chloroplastic-like [Chenopodium quinoa]	PF01458	Uncharacterized protein family
TRINITY_DN104321_c0_g1	BP:protein methylation;MF:methyltransferase activity		B:Chromatin structure and dynamics;D:Cell cycle control, cell division, chromosome partitioning;L:Replication, recombination and repair;T:Signal transduction mechanisms;U:Intracellular trafficking, secretion, and vesicular transport	protein arginine N-methyltransferase 1.1-like [Dorcoceras hygrometricum]	PF06325;PF13649;PF08241;PF13847;PF05175;PF08242	Ribosomal protein L11 methyltransferase ;Methyltransferase domain;Methyltransferase domain;Methyltransferase domain;Methyltransferase small domain;Methyltransferase domain
TRINITY_DN104329_c0_g1	CC:retrotransposon nucleocapsid;BP:DNA integration;MF:transferase activity;MF:methylmalonate-semialdehyde dehydrogenase ;MF:nucleic acid binding		S:Function unknown;S:Function unknown	Retrovirus-related Pol polyprotein from transposon TNT 1-94 [Cajanus cajan]	PF00665;PF13976	Integrase core domain;GAG-pre-integrase domain
TRINITY_DN10433_c0_g1	CC:anchored component of plasma membrane;MF:serine-type peptidase activity		S:Function unknown	PREDICTED: proteoglycan 4-like [Lupinus angustifolius] >OIW17937.1 hypothetical protein TanjilG_17773 [Lupinus angustifolius]
TRINITY_DN104330_c0_g1	MF:catalytic activity;MF:transaminase activity	Glyoxylate and dicarboxylate metabolism;Alanine, aspartate and glutamate metabolism;Glycine, serine and threonine metabolism;Peroxisome	S:Function unknown	PREDICTED: serine--glyoxylate aminotransferase-like [Lupinus angustifolius] >XP_019458489.1 PREDICTED: serine--glyoxylate aminotransferase-like [Lupinus angustifolius] >XP_019458490.1 PREDICTED: serine--glyoxylate aminotransferase-like [Lupinus angustifolius] >OIW03254.1 hypothetical protein TanjilG_21783 [Lupinus angustifolius]
TRINITY_DN104334_c0_g1	MF:alpha-amylase activity;BP:carbohydrate metabolic process;MF:calcium ion binding		S:Function unknown;I:Lipid transport and metabolism	unknown [Picea sitchensis] >ACN40296.1 unknown [Picea sitchensis]	PF02036;PF14864	SCP-2 sterol transfer family;Alkyl sulfatase C-terminal
TRINITY_DN104335_c0_g1	CC:SAGA complex;BP:regulation of transcription, DNA-templated;CC:nucleus;BP:DNA repair;MF:transcription cofactor activity;MF:protein serine/threonine kinase activity;CC:NuA4 histone acetyltransferase complex;MF:ATP binding		B:Chromatin structure and dynamics;D:Cell cycle control, cell division, chromosome partitioning;L:Replication, recombination and repair;T:Signal transduction mechanisms;U:Intracellular trafficking, secretion, and vesicular transport	hypothetical protein TanjilG_22039 [Lupinus angustifolius]
TRINITY_DN10434_c0_g1	CC:integral component of membrane		S:Function unknown	hypothetical protein TanjilG_20213 [Lupinus angustifolius]
TRINITY_DN104341_c0_g1				PREDICTED: uncharacterized protein LOC109339849, partial [Lupinus angustifolius]	PF14223	gag-polypeptide of LTR copia-type
TRINITY_DN104347_c0_g1	BP:ribosomal small subunit assembly;CC:ribosome;BP:maturation of SSU-rRNA;MF:structural constituent of ribosome;MF:protein heterodimerization activity;BP:translation;CC:cytosolic small ribosomal subunit	Ribosome	S:Function unknown	hypothetical protein PAHAL_1G135600 [Panicum hallii] >PUZ75195.1 hypothetical protein GQ55_1G131100 [Panicum hallii var. hallii]	PF01200	Ribosomal protein S28e
TRINITY_DN10435_c0_g1	MF:metalloendopeptidase activity;CC:integral component of membrane;BP:collagen catabolic process;CC:extracellular matrix;BP:extracellular matrix organization;MF:zinc ion binding		S:Function unknown	PREDICTED: metalloendoproteinase 1-like [Lupinus angustifolius] >OIV94532.1 hypothetical protein TanjilG_25594 [Lupinus angustifolius]	PF00413	Matrixin
TRINITY_DN104359_c0_g1	BP:ubiquitin-dependent protein catabolic process;MF:thiol-dependent ubiquitin-specific protease activity		S:Function unknown	Ubiquitin carboxyl-terminal hydrolase isozyme L3 [Capsicum chinense]	PF01088	Ubiquitin carboxyl-terminal hydrolase, family 1
TRINITY_DN10436_c0_g1	CC:cytosol;BP:fructose 1,6-bisphosphate metabolic process;MF:fructose-bisphosphate aldolase activity;BP:glycolytic process	Glycolysis / Gluconeogenesis;Pentose phosphate pathway;Fructose and mannose metabolism;Carbon fixation in photosynthetic organisms	G:Carbohydrate transport and metabolism	PREDICTED: fructose-bisphosphate aldolase 1, chloroplastic [Lupinus angustifolius] >OIV99518.1 hypothetical protein TanjilG_17328 [Lupinus angustifolius]	PF00274	Fructose-bisphosphate aldolase class-I
TRINITY_DN104360_c0_g1	BP:lipid transport		B:Chromatin structure and dynamics;D:Cell cycle control, cell division, chromosome partitioning;L:Replication, recombination and repair;T:Signal transduction mechanisms;U:Intracellular trafficking, secretion, and vesicular transport	Non-specific lipid-transfer protein 2 [Spatholobus suberectus]	PF14368	Probable lipid transfer
TRINITY_DN104364_c0_g1	MF:structural constituent of ribosome;CC:ribosome;BP:translation;CC:cytosolic large ribosomal subunit	Ribosome	S:Function unknown	60S ribosomal protein L13-1-like [Phalaenopsis equestris]	PF01294	Ribosomal protein L13e
TRINITY_DN10437_c1_g1	MF:metal ion binding;MF:dioxygenase activity;MF:oxidoreductase activity	Flavonoid biosynthesis	S:Function unknown	PREDICTED: leucoanthocyanidin dioxygenase-like isoform X2 [Lupinus angustifolius] >OIV92749.1 hypothetical protein TanjilG_00883 [Lupinus angustifolius]	PF14226;PF03171	non-haem dioxygenase in morphine synthesis N-terminal;2OG-Fe
TRINITY_DN104372_c0_g1	MF:translation initiation factor activity;MF:nucleic acid binding;MF:ATP binding;MF:helicase activity	RNA transport	S:Function unknown	predicted protein [Hordeum vulgare subsp. vulgare]	PF00270;PF04851;PF13245	DEAD/DEAH box helicase;Type III restriction enzyme, res subunit;AAA domain
TRINITY_DN10438_c0_g1	CC:integral component of membrane		S:Function unknown	PREDICTED: CSC1-like protein RXW8 [Lupinus angustifolius] >XP_019437873.1 PREDICTED: CSC1-like protein RXW8 [Lupinus angustifolius] >OIW14925.1 hypothetical protein TanjilG_30644 [Lupinus angustifolius]	PF02714;PF13967;PF14703	Calcium-dependent channel, 7TM region, putative phosphate;Late exocytosis, associated with Golgi transport;Cytosolic domain of 10TM putative phosphate transporter
TRINITY_DN10438_c1_g1	CC:integral component of membrane;CC:membrane		S:Function unknown	PREDICTED: CSC1-like protein RXW8 isoform X2 [Lupinus angustifolius] >OIV96398.1 hypothetical protein TanjilG_09825 [Lupinus angustifolius]
TRINITY_DN104381_c0_g1				PREDICTED: uncharacterized protein LOC109335433 [Lupinus angustifolius]
TRINITY_DN104383_c0_g1			B:Chromatin structure and dynamics;D:Cell cycle control, cell division, chromosome partitioning;L:Replication, recombination and repair;T:Signal transduction mechanisms;U:Intracellular trafficking, secretion, and vesicular transport	PREDICTED: uncharacterized protein LOC104242320 [Nicotiana sylvestris]
TRINITY_DN10439_c0_g1	BP:negative regulation of transcription, DNA-templated		S:Function unknown	PREDICTED: transcription repressor OFP8-like [Lupinus angustifolius] >OIW10018.1 hypothetical protein TanjilG_32758 [Lupinus angustifolius]	PF04844	Transcriptional repressor, ovate
TRINITY_DN10439_c0_g2	MF:kinase activity;BP:negative regulation of transcription, DNA-templated		S:Function unknown	PREDICTED: transcription repressor OFP8-like [Lupinus angustifolius] >OIW18075.1 hypothetical protein TanjilG_00327 [Lupinus angustifolius]	PF04844	Transcriptional repressor, ovate
TRINITY_DN104390_c0_g1				unknown protein [Oryza sativa Japonica Group] >BAF09173.1 Os02g0583700 [Oryza sativa Japonica Group] >EAY86449.1 hypothetical protein OsI_07831 [Oryza sativa Indica Group] >EAZ23591.1 hypothetical protein OsJ_07290 [Oryza sativa Japonica Group] >BAS79447.1 Os02g0583700 [Oryza sativa Japonica Group]
TRINITY_DN104398_c0_g1	CC:integral component of membrane;MF:metal ion transmembrane transporter activity;MF:zinc ion transmembrane transporter activity		O:Posttranslational modification, protein turnover, chaperones	PREDICTED: zinc transporter 8-like [Lupinus angustifolius] >OIW19909.1 hypothetical protein TanjilG_28888 [Lupinus angustifolius]	PF02535	ZIP Zinc transporter
TRINITY_DN104399_c0_g1	MF:structural constituent of ribosome;CC:cytosolic large ribosomal subunit;BP:translation;CC:ribosome	Ribosome	K:Transcription	60S ribosomal protein L28-2 [Dendrobium catenatum]	PF01778	Ribosomal L28e protein family
TRINITY_DN1044_c0_g1			S:Function unknown	PREDICTED: uncharacterized protein LOC109338232 isoform X2 [Lupinus angustifolius]
TRINITY_DN1044_c0_g2			S:Function unknown	PREDICTED: uncharacterized protein LOC109343465 isoform X4 [Lupinus angustifolius]
TRINITY_DN10440_c0_g1	CC:nucleus;MF:DNA binding		S:Function unknown	PREDICTED: transcription factor PCL1-like [Lupinus angustifolius] >OIW15496.1 hypothetical protein TanjilG_32900 [Lupinus angustifolius]	PF00249	Myb-like DNA-binding domain
TRINITY_DN10440_c1_g1	CC:nucleus;MF:DNA binding		S:Function unknown	PREDICTED: transcription factor PCL1-like [Lupinus angustifolius] >OIW09476.1 hypothetical protein TanjilG_06348 [Lupinus angustifolius]
TRINITY_DN10440_c1_g2	MF:transcription factor activity, sequence-specific DNA binding;CC:nucleus;MF:DNA binding		S:Function unknown	PREDICTED: transcription factor PCL1-like [Lupinus angustifolius] >OIW15496.1 hypothetical protein TanjilG_32900 [Lupinus angustifolius]	PF00249	Myb-like DNA-binding domain
TRINITY_DN104405_c0_g1	MF:structural constituent of ribosome;BP:translation;CC:ribosome	Ribosome	J:Translation, ribosomal structure and biogenesis	60S ribosomal protein L31-like [Cynara cardunculus var. scolymus] >KVI12278.1 Ribosomal protein L31e [Cynara cardunculus var. scolymus]	PF01198	Ribosomal protein L31e
TRINITY_DN10441_c0_g1	MF:transcription factor activity, sequence-specific DNA binding;MF:AT DNA binding;CC:nucleus		S:Function unknown	PREDICTED: AT-hook motif nuclear-localized protein 15-like isoform X1 [Lupinus angustifolius] >OIW02692.1 hypothetical protein TanjilG_29468 [Lupinus angustifolius]	PF03479	Plants and Prokaryotes Conserved
TRINITY_DN10441_c1_g1	MF:transcription factor activity, sequence-specific DNA binding;MF:AT DNA binding;CC:nucleus		S:Function unknown	PREDICTED: AT-hook motif nuclear-localized protein 15-like [Lupinus angustifolius] >OIW04069.1 hypothetical protein TanjilG_00629 [Lupinus angustifolius]	PF03479	Plants and Prokaryotes Conserved
TRINITY_DN104411_c0_g1	MF:RNA-directed DNA polymerase activity;MF:RNA-DNA hybrid ribonuclease activity;MF:nucleic acid binding			PREDICTED: uncharacterized protein LOC109356210 [Lupinus angustifolius]	PF13456;PF00075	Reverse transcriptase-like;RNase H
TRINITY_DN10442_c0_g1	MF:transferase activity, transferring acyl groups, acyl groups converted into alkyl on transfer;MF:succinate-CoA ligase ;MF:lyase activity;MF:ligase activity;MF:ATP citrate synthase activity	Citrate cycle	C:Energy production and conversion	PREDICTED: ATP-citrate synthase beta chain protein 1 [Lupinus angustifolius] >XP_019425315.1 PREDICTED: ATP-citrate synthase beta chain protein 1 [Lupinus angustifolius] >XP_019425316.1 PREDICTED: ATP-citrate synthase beta chain protein 1 [Lupinus angustifolius] >OIV91778.1 hypothetical protein TanjilG_14357 [Lupinus angustifolius]
TRINITY_DN104426_c0_g1	CC:retrotransposon nucleocapsid;MF:transcription cofactor activity;MF:DNA-directed DNA polymerase activity;BP:DNA integration;BP:regulation of transcription from RNA polymerase II promoter;MF:nucleic acid binding;MF:RNA-directed DNA polymerase activity;CC:mediator complex	Endocytosis	L:Replication, recombination and repair	mediator of RNA polymerase II transcription subunit 15a isoform X2 [Medicago truncatula]	PF07727	Reverse transcriptase
TRINITY_DN104432_c0_g1	MF:RNA binding		S:Function unknown;S:Function unknown	hypothetical protein TSUD_234080 [Trifolium subterraneum]	PF00076;PF14111	RNA recognition motif. ;Domain of unknown function
TRINITY_DN104433_c0_g1		Phagosome;Oxidative phosphorylation	S:Function unknown	probable V-type proton ATPase 20 kDa proteolipid subunit [Quercus suber]
TRINITY_DN10444_c0_g1	MF:ligase activity	Valine, leucine and isoleucine degradation	I:Lipid transport and metabolism	PREDICTED: methylcrotonoyl-CoA carboxylase beta chain, mitochondrial isoform X1 [Lupinus angustifolius] >XP_019423413.1 PREDICTED: methylcrotonoyl-CoA carboxylase beta chain, mitochondrial isoform X2 [Lupinus angustifolius]	PF01039	Carboxyl transferase domain
TRINITY_DN10444_c1_g1			S:Function unknown	PREDICTED: uncharacterized protein LOC109347363 [Lupinus angustifolius] >OIW12472.1 hypothetical protein TanjilG_04221 [Lupinus angustifolius]	PF14234	Domain of unknown function
TRINITY_DN104448_c0_g1	CC:retrotransposon nucleocapsid;BP:DNA integration;MF:nucleic acid binding			PREDICTED: uncharacterized protein LOC109356169 [Lupinus angustifolius]
TRINITY_DN10445_c0_g1	MF:methylmalonate-semialdehyde dehydrogenase ;CC:retrotransposon nucleocapsid;MF:DNA-directed DNA polymerase activity;BP:DNA integration;MF:zinc ion binding;MF:nucleic acid binding;MF:FAD binding;MF:oxidoreductase activity		S:Function unknown;S:Function unknown;L:Replication, recombination and repair	PREDICTED: uncharacterized protein LOC109344682 [Lupinus angustifolius]	PF13976;PF00098;PF15288	GAG-pre-integrase domain;Zinc knuckle;Zinc knuckle
TRINITY_DN104456_c0_g1	BP:cell redox homeostasis;CC:cell;MF:peroxiredoxin activity	Peroxisome	S:Function unknown	2-Cys peroxiredoxin BAS1, chloroplastic-like [Olea europaea var. sylvestris]	PF00578;PF08534	AhpC/TSA family;Redoxin
TRINITY_DN104457_c0_g1	MF:cyclin-dependent protein serine/threonine kinase regulator activity;MF:kinase activity;BP:cell division;BP:cell cycle		T:Signal transduction mechanisms	hypothetical protein DM860_001561 [Cuscuta australis]	PF01111	Cyclin-dependent kinase regulatory subunit
TRINITY_DN10446_c0_g1	CC:integral component of membrane;BP:gene silencing by RNA;MF:nucleic acid binding		J:Translation, ribosomal structure and biogenesis	PREDICTED: protein argonaute 1-like [Lupinus angustifolius] >OIW16076.1 hypothetical protein TanjilG_04611 [Lupinus angustifolius]	PF02170;PF16488	PAZ domain;Argonaute linker 2 domain
TRINITY_DN10446_c0_g2	BP:gene silencing by RNA;MF:nucleic acid binding			protein argonaute 1 [Abrus precatorius]
TRINITY_DN10446_c0_g3	CC:integral component of membrane;BP:gene silencing by RNA;MF:nucleic acid binding		J:Translation, ribosomal structure and biogenesis	PREDICTED: protein argonaute 1-like [Lupinus angustifolius] >OIW16076.1 hypothetical protein TanjilG_04611 [Lupinus angustifolius]	PF16488	Argonaute linker 2 domain
TRINITY_DN104460_c0_g1	MF:transcription factor activity, sequence-specific DNA binding;MF:sequence-specific DNA binding;CC:nucleus;BP:positive regulation of transcription, DNA-templated;BP:regulation of transcription, DNA-templated		O:Posttranslational modification, protein turnover, chaperones	PREDICTED: putative homeobox-leucine zipper protein ATHB-51 [Lupinus angustifolius]	PF00046;PF02183;PF05920	Homeodomain;Homeobox associated leucine zipper;Homeobox KN domain
TRINITY_DN104461_c0_g1	BP:DNA integration;CC:nucleus;MF:nucleic acid binding			hypothetical protein L195_g050182, partial [Trifolium pratense]
TRINITY_DN104462_c0_g1	BP:cell wall modification;CC:cell wall;CC:integral component of membrane;MF:pectinesterase activity;CC:extracellular region;MF:aspartyl esterase activity;BP:pectin catabolic process		S:Function unknown	PREDICTED: probable pectinesterase 29 [Lupinus angustifolius] >OIW01901.1 hypothetical protein TanjilG_15226 [Lupinus angustifolius]	PF01095	Pectinesterase
TRINITY_DN104463_c0_g1	MF:transcription factor activity, sequence-specific DNA binding;MF:sequence-specific DNA binding;CC:nucleus		K:Transcription	PREDICTED: probable WRKY transcription factor 40 [Lupinus angustifolius] >OIW09294.1 hypothetical protein TanjilG_01265 [Lupinus angustifolius]	PF03106;PF11376	WRKY DNA -binding domain;Protein of unknown function
TRINITY_DN10447_c0_g2	MF:serine-type endopeptidase activity;CC:integral component of membrane		S:Function unknown	PREDICTED: RHOMBOID-like protein 3 [Lupinus angustifolius] >OIW06327.1 hypothetical protein TanjilG_14972 [Lupinus angustifolius]	PF01694	Rhomboid family
TRINITY_DN104474_c0_g1	MF:structural constituent of ribosome;BP:translation;CC:ribosome	Ribosome	J:Translation, ribosomal structure and biogenesis	hypothetical protein CRG98_004317 [Punica granatum]	PF01201	Ribosomal protein S8e
TRINITY_DN10448_c0_g1	MF:hydrolase activity, acting on ester bonds		S:Function unknown	PREDICTED: GDSL esterase/lipase At5g45960-like [Lupinus angustifolius]	PF00657	GDSL-like Lipase/Acylhydrolase
TRINITY_DN104485_c0_g1	MF:sugar transmembrane transporter activity;CC:integral component of membrane;CC:plasma membrane;BP:carbohydrate transport		L:Replication, recombination and repair	bifunctional aspartate aminotransferase and glutamate/aspartate-prephenate aminotransferase [Jatropha curcas] >KDP46883.1 hypothetical protein JCGZ_24092 [Jatropha curcas]	PF03083	Sugar efflux transporter for intercellular exchange
TRINITY_DN10449_c0_g2	MF:ATPase activity;MF:tetrahydrofolylpolyglutamate synthase activity;MF:helicase activity;MF:DNA-directed DNA polymerase activity;MF:catalytic activity;MF:zinc ion binding;MF:nucleic acid binding;MF:DNA binding;MF:3-isopropylmalate dehydratase activity;MF:protein dimerization activity;MF:transferase activity, transferring glycosyl groups;MF:ATP binding		E:Amino acid transport and metabolism;S:Function unknown	LINE-1 retrotransposable element ORF2 protein [Glycine soja]
TRINITY_DN1045_c0_g1	CC:Golgi stack;CC:trans-Golgi network;BP:protein folding;CC:endoplasmic reticulum;CC:cytosol;CC:membrane;MF:unfolded protein binding;BP:root development;BP:regulation of protein refolding;MF:peptidyl-prolyl cis-trans isomerase activity;BP:protein refolding;MF:cyclosporin A binding;CC:endosome;CC:multivesicular body;CC:plasmodesma;CC:chloroplast		O:Posttranslational modification, protein turnover, chaperones	PREDICTED: peptidyl-prolyl cis-trans isomerase CYP20-1 [Lupinus angustifolius] >OIW09540.1 hypothetical protein TanjilG_30859 [Lupinus angustifolius]	PF00160	Cyclophilin type peptidyl-prolyl cis-trans isomerase/CLD
TRINITY_DN104501_c0_g1	CC:retrotransposon nucleocapsid;BP:DNA integration;MF:RNA-directed DNA polymerase activity;MF:nucleic acid binding		S:Function unknown	Retrovirus-related Pol polyprotein from transposon TNT 1-94 [Cajanus cajan]
TRINITY_DN104505_c0_g1	CC:endoplasmic reticulum;BP:protein glycosylation;BP:protein N-linked glycosylation;CC:integral component of membrane;CC:membrane;CC:endoplasmic reticulum membrane;MF:dolichyl-diphosphooligosaccharide-protein glycotransferase activity;BP:protein N-linked glycosylation via asparagine	N-Glycan biosynthesis;Protein processing in endoplasmic reticulum	S:Function unknown	PREDICTED: dolichyl-diphosphooligosaccharide--protein glycosyltransferase subunit 1A [Tarenaya hassleriana]	PF04597	Ribophorin I
TRINITY_DN104507_c0_g1	CC:retrotransposon nucleocapsid;BP:DNA integration;MF:methylmalonate-semialdehyde dehydrogenase ;MF:zinc ion binding;MF:nucleic acid binding		L:Replication, recombination and repair;S:Function unknown	Retrovirus-related Pol polyprotein from transposon TNT 1-94 [Cajanus cajan]
TRINITY_DN10451_c1_g1	CC:integral component of membrane;MF:solute;MF:zinc ion binding		S:Function unknown	staphylococcal nuclease domain-containing protein 1 [Spatholobus suberectus]
TRINITY_DN10451_c1_g2				hypothetical protein DEO72_LG4g49 [Vigna unguiculata]
TRINITY_DN10451_c1_g3				hypothetical protein DEO72_LG3g2861 [Vigna unguiculata]
TRINITY_DN10451_c1_g4				conserved hypothetical protein [Ricinus communis] >EEF26887.1 conserved hypothetical protein [Ricinus communis]
TRINITY_DN104518_c0_g1	MF:transferase activity;BP:phosphatidylserine biosynthetic process;CC:integral component of membrane	Glycerophospholipid metabolism	I:Lipid transport and metabolism	CDP-diacylglycerol--serine O-phosphatidyltransferase 1, partial [Mucuna pruriens]	PF03034	Phosphatidyl serine synthase
TRINITY_DN10452_c0_g1			S:Function unknown	PREDICTED: uncharacterized protein LOC109354467 [Lupinus angustifolius] >OIW06855.1 hypothetical protein TanjilG_18237 [Lupinus angustifolius]	PF02696	Uncharacterized ACR, YdiU/UPF0061 family
TRINITY_DN104521_c0_g1	MF:water channel activity;CC:integral component of membrane;MF:channel activity;CC:vacuolar membrane		S:Function unknown	PREDICTED: probable aquaporin TIP1-1 [Oryza brachyantha]	PF00230	Major intrinsic protein
TRINITY_DN104523_c0_g1	MF:structural constituent of ribosome;CC:integral component of membrane;BP:translation;CC:cytosolic small ribosomal subunit	Ribosome	S:Function unknown	predicted protein [Hordeum vulgare subsp. vulgare]	PF01015	Ribosomal S3Ae family
TRINITY_DN104524_c0_g1	MF:sequence-specific DNA binding;MF:transcription regulatory region DNA binding;CC:nucleus;BP:multicellular organism development;BP:positive regulation of transcription from RNA polymerase II promoter;MF:core promoter proximal region sequence-specific DNA binding;MF:protein dimerization activity;MF:transcription factor binding;MF:RNA polymerase II transcription factor activity, sequence-specific …		L:Replication, recombination and repair	PREDICTED: agamous-like MADS-box protein AGL80 [Lupinus angustifolius] >OIW14087.1 hypothetical protein TanjilG_11432 [Lupinus angustifolius]	PF00319	SRF-type transcription factor
TRINITY_DN10453_c0_g1	MF:transcription factor activity, sequence-specific DNA binding;MF:sequence-specific DNA binding;CC:nucleus		K:Transcription	PREDICTED: probable WRKY transcription factor 17 [Lupinus angustifolius] >OIV97776.1 hypothetical protein TanjilG_12533 [Lupinus angustifolius]	PF03106;PF10533	WRKY DNA -binding domain;Plant zinc cluster domain
TRINITY_DN104539_c0_g1	MF:structural constituent of ribosome;MF:RNA binding;BP:translation;CC:small ribosomal subunit	Ribosome	J:Translation, ribosomal structure and biogenesis	predicted protein [Hordeum vulgare subsp. vulgare]	PF00338	Ribosomal protein S10p/S20e
TRINITY_DN10454_c0_g1	BP:Notch signaling pathway;CC:integral component of membrane;CC:Golgi-associated vesicle;CC:Golgi membrane;MF:endopeptidase activity;MF:aspartic-type endopeptidase activity;CC:integral component of plasma membrane;BP:protein processing;CC:endoplasmic reticulum membrane;CC:nucleus		U:Intracellular trafficking, secretion, and vesicular transport	PREDICTED: presenilin-like protein At2g29900 isoform X1 [Lupinus angustifolius]	PF01080	Presenilin
TRINITY_DN104546_c0_g1				PREDICTED: uncharacterized protein LOC109339940, partial [Lupinus angustifolius]	PF14392	Zinc knuckle
TRINITY_DN104554_c0_g1	BP:positive regulation of translational termination;CC:integral component of membrane;CC:prefoldin complex;BP:positive regulation of translational elongation;BP:translational frameshifting;MF:transcription cofactor activity;BP:defense response to bacterium;CC:mediator complex;BP:protein folding;CC:cytoplasm;CC:nucleus;BP:response to bacterium;BP:response to wounding;MF:unfolded protein binding;BP…		S:Function unknown	eukaryotic translation initiation factor 5A-like [Quercus suber]	PF01287	Eukaryotic elongation factor 5A hypusine, DNA-binding OB fold
TRINITY_DN10456_c0_g1	BP:fatty acid biosynthetic process;CC:integral component of membrane;CC:membrane;BP:response to light stimulus;MF:transferase activity, transferring acyl groups other than amino-acyl groups;BP:response to cold	Fatty acid elongation	I:Lipid transport and metabolism	PREDICTED: 3-ketoacyl-CoA synthase 19-like [Lupinus angustifolius]	PF08392;PF08541;PF02797	FAE1/Type III polyketide synthase-like protein;3-Oxoacyl-[acyl-carrier-protein ;Chalcone and stilbene synthases, C-terminal domain
TRINITY_DN104563_c0_g1	MF:RNA-DNA hybrid ribonuclease activity;MF:nucleic acid binding			PREDICTED: uncharacterized protein LOC109337508 [Lupinus angustifolius]	PF14111	Domain of unknown function
TRINITY_DN10457_c0_g1	MF:hydrolase activity;MF:chlorophyllase activity;MF:pheophytinase b activity		S:Function unknown	PREDICTED: pheophytinase, chloroplastic-like [Lupinus angustifolius] >XP_019425837.1 PREDICTED: pheophytinase, chloroplastic-like [Lupinus angustifolius] >OIW17073.1 hypothetical protein TanjilG_15656 [Lupinus angustifolius]	PF12697;PF00561;PF12146	Alpha/beta hydrolase family;alpha/beta hydrolase fold;Serine aminopeptidase, S33
TRINITY_DN104579_c0_g1				hypothetical protein TanjilG_12519 [Lupinus angustifolius]
TRINITY_DN10458_c0_g1	BP:developmental process;CC:integral component of membrane;BP:chloroplast organization;BP:regulation of transcription, DNA-templated;MF:double-stranded DNA binding;CC:chloroplast		S:Function unknown	PREDICTED: transcription termination factor MTERF2, chloroplastic [Lupinus angustifolius]	PF02536	mTERF
TRINITY_DN10458_c0_g2	BP:chloroplast organization;BP:regulation of transcription, DNA-templated;MF:double-stranded DNA binding;BP:developmental process;CC:chloroplast		S:Function unknown	hypothetical protein TanjilG_03397 [Lupinus angustifolius]
TRINITY_DN104580_c0_g1	MF:structural constituent of ribosome;CC:small ribosomal subunit;MF:RNA binding;BP:translation	Ribosome	S:Function unknown	predicted protein [Hordeum vulgare subsp. vulgare]	PF00177	Ribosomal protein S7p/S5e
TRINITY_DN104586_c0_g1	MF:hydrolase activity, acting on ester bonds		S:Function unknown	hypothetical protein TanjilG_12973 [Lupinus angustifolius]
TRINITY_DN10459_c0_g1			S:Function unknown	PREDICTED: uncharacterized protein LOC109354205 [Lupinus angustifolius] >XP_019452087.1 PREDICTED: uncharacterized protein LOC109354205 [Lupinus angustifolius] >XP_019452088.1 PREDICTED: uncharacterized protein LOC109354205 [Lupinus angustifolius] >OIW07404.1 hypothetical protein TanjilG_10239 [Lupinus angustifolius]	PF09784	Mitochondrial ribosomal protein L31
TRINITY_DN104594_c0_g1	CC:retrotransposon nucleocapsid;BP:DNA integration;MF:zinc ion binding;MF:nucleic acid binding		L:Replication, recombination and repair;S:Function unknown	hypothetical protein TSUD_278270 [Trifolium subterraneum]
TRINITY_DN1046_c0_g1	CC:mediator complex;CC:integral component of membrane;BP:regulation of transcription from RNA polymerase II promoter;MF:transcription cofactor activity		K:Transcription	PREDICTED: mediator of RNA polymerase II transcription subunit 12 [Lupinus angustifolius] >XP_019434668.1 PREDICTED: mediator of RNA polymerase II transcription subunit 12 [Lupinus angustifolius]	PF09497	Transcription mediator complex subunit Med12
TRINITY_DN10460_c0_g1	MF:protein serine/threonine kinase activity;CC:integral component of membrane;MF:carbohydrate binding;MF:ATP binding;MF:protein kinase activity		T:Signal transduction mechanisms	hypothetical protein TanjilG_29778 [Lupinus angustifolius]	PF01453;PF00954	D-mannose binding lectin;S-locus glycoprotein domain
TRINITY_DN104608_c0_g1	BP:ribosomal small subunit assembly;CC:cytosolic small ribosomal subunit;CC:integral component of membrane;MF:structural constituent of ribosome;BP:cytoplasmic translation;BP:translation	Ribosome	S:Function unknown	4-coumarate--CoA ligase-like 9 [Momordica charantia]	PF16122;PF00318	40S ribosomal protein SA C-terminus;Ribosomal protein S2
TRINITY_DN10461_c0_g1	MF:ATPase activity, coupled to transmembrane movement of substances;CC:integral component of membrane;CC:membrane;CC:plant-type vacuole;CC:vacuolar membrane;MF:ATPase activity;BP:transmembrane transport;MF:ATP binding		V:Defense mechanisms	PREDICTED: ABC transporter C family member 2-like isoform X1 [Lupinus angustifolius] >OIW20357.1 hypothetical protein TanjilG_09517 [Lupinus angustifolius]	PF00664;PF00005;PF02463;PF01926	ABC transporter transmembrane region;ABC transporter;RecF/RecN/SMC N terminal domain;50S ribosome-binding GTPase
TRINITY_DN104614_c0_g1	CC:cytosolic ribosome;CC:ribosome;CC:cytosolic large ribosomal subunit;BP:nucleosome assembly;CC:nucleosome;CC:nucleus;MF:structural constituent of ribosome;BP:cytoplasmic translation;MF:DNA binding;MF:ribonucleoprotein complex binding;BP:translational elongation;MF:protein kinase activator activity	Ribosome	S:Function unknown	60S acidic ribosomal protein P2-4-like [Durio zibethinus]	PF00428	60s Acidic ribosomal protein
TRINITY_DN10462_c0_g1	BP:cell redox homeostasis;MF:peroxidase activity;CC:cell;MF:peroxiredoxin activity		O:Posttranslational modification, protein turnover, chaperones	PREDICTED: 2-Cys peroxiredoxin BAS1, chloroplastic-like [Lupinus angustifolius] >OIW11341.1 hypothetical protein TanjilG_31109 [Lupinus angustifolius]	PF00578;PF10417;PF08534	AhpC/TSA family;C-terminal domain of 1-Cys peroxiredoxin;Redoxin
TRINITY_DN10462_c0_g2	BP:cell redox homeostasis;MF:peroxidase activity;CC:cell;MF:peroxiredoxin activity		O:Posttranslational modification, protein turnover, chaperones	PREDICTED: 2-Cys peroxiredoxin BAS1, chloroplastic [Lupinus angustifolius] >OIW12187.1 hypothetical protein TanjilG_28595 [Lupinus angustifolius]	PF00578;PF08534;PF10417	AhpC/TSA family;Redoxin;C-terminal domain of 1-Cys peroxiredoxin
TRINITY_DN10463_c0_g1	CC:membrane;BP:lipid catabolic process;MF:N-acylphosphatidylethanolamine-specific phospholipase D activity;MF:calcium ion binding;MF:phospholipase D activity;BP:phosphatidylcholine metabolic process	Ether lipid metabolism;Glycerophospholipid metabolism;Endocytosis	I:Lipid transport and metabolism	PREDICTED: phospholipase D gamma 1-like isoform X1 [Lupinus angustifolius]	PF12357;PF00168;PF00614;PF13091	Phospholipase D C terminal;C2 domain;Phospholipase D Active site motif;PLD-like domain
TRINITY_DN104630_c0_g1		Protein processing in endoplasmic reticulum	S:Function unknown		PF05404	Translocon-associated protein, delta subunit precursor
TRINITY_DN104632_c0_g1	CC:proton-transporting ATP synthase complex, coupling factor F;CC:integral component of membrane;BP:ATP synthesis coupled proton transport;MF:hydrogen ion transmembrane transporter activity	Oxidative phosphorylation	S:Function unknown	PREDICTED: LOW QUALITY PROTEIN: ATP synthase subunit a [Gossypium hirsutum]	PF00119	ATP synthase A chain
TRINITY_DN10464_c0_g1			S:Function unknown	PREDICTED: uncharacterized protein LOC109355295 isoform X1 [Lupinus angustifolius] >OIW05836.1 hypothetical protein TanjilG_23622 [Lupinus angustifolius]
TRINITY_DN10464_c0_g2			S:Function unknown	PREDICTED: uncharacterized protein LOC109351692 isoform X2 [Lupinus angustifolius]	PF13920	Zinc finger, C3HC4 type
TRINITY_DN10465_c0_g1	BP:dTMP biosynthetic process;BP:one-carbon metabolic process;CC:mitochondrion;BP:tetrahydrofolate biosynthetic process;MF:thymidylate synthase activity;MF:dihydrofolate reductase activity;CC:cytosol	Pyrimidine metabolism;One carbon pool by folate;Folate biosynthesis	S:Function unknown	PREDICTED: bifunctional dihydrofolate reductase-thymidylate synthase-like [Lupinus angustifolius] >XP_019438171.1 PREDICTED: bifunctional dihydrofolate reductase-thymidylate synthase-like [Lupinus angustifolius] >XP_019438172.1 PREDICTED: bifunctional dihydrofolate reductase-thymidylate synthase-like [Lupinus angustifolius] >XP_019438173.1 PREDICTED: bifunctional dihydrofolate reductase-thymidyla…	PF00186;PF00303	Dihydrofolate reductase;Thymidylate synthase
TRINITY_DN10466_c0_g1	CC:cytoplasm;CC:endoplasmic reticulum;BP:endoplasmic reticulum organization;MF:GTPase activity;CC:integral component of membrane;BP:endoplasmic reticulum membrane fusion;CC:endoplasmic reticulum membrane;MF:GTP binding		Z:Cytoskeleton	PREDICTED: protein ROOT HAIR DEFECTIVE 3-like [Lupinus angustifolius]	PF05879;PF02263;PF01926	Root hair defective 3 GTP-binding protein ;Guanylate-binding protein, N-terminal domain;50S ribosome-binding GTPase
TRINITY_DN104665_c0_g1	CC:integral component of membrane;CC:oligosaccharyltransferase I complex;BP:protein N-linked glycosylation		S:Function unknown	PREDICTED: transmembrane protein 258 [Theobroma cacao] >XP_012444370.1 PREDICTED: transmembrane protein 258 [Gossypium raimondii] >XP_016726153.1 PREDICTED: transmembrane protein 258-like [Gossypium hirsutum] >XP_016689877.1 PREDICTED: transmembrane protein 258-like [Gossypium hirsutum] >XP_017644767.1 PREDICTED: transmembrane protein 258 [Gossypium arboreum] >XP_017983246.1 PREDICTED: transmembr…	PF05251	Oligosaccharyltransferase subunit 5
TRINITY_DN104666_c0_g1	MF:structural constituent of ribosome;CC:integral component of membrane;CC:ribosome;BP:translation;CC:cytosolic small ribosomal subunit	Ribosome	S:Function unknown	PREDICTED: 40S ribosomal protein S11 [Vitis vinifera] >CBI21107.3 unnamed protein product, partial [Vitis vinifera]	PF16205;PF00366	Ribosomal_S17 N-terminal;Ribosomal protein S17
TRINITY_DN10467_c0_g1	MF:catalytic activity;MF:cinnamyl-alcohol dehydrogenase activity;MF:cinnamoyl-CoA reductase activity;MF:sinapyl alcohol dehydrogenase activity;MF:coenzyme binding		M:Cell wall/membrane/envelope biogenesis	PREDICTED: tetraketide alpha-pyrone reductase 1-like [Lupinus angustifolius]	PF01370;PF01073;PF16363;PF13460;PF07993;PF05368;PF02719;PF00106;PF08659	NAD dependent epimerase/dehydratase family;3-beta hydroxysteroid dehydrogenase/isomerase family;GDP-mannose 4,6 dehydratase;NAD;Male sterility protein;NmrA-like family;Polysaccharide biosynthesis protein;short chain dehydrogenase;KR domain
TRINITY_DN10468_c0_g1			S:Function unknown	hypothetical protein TanjilG_03580 [Lupinus angustifolius]	PF00646;PF14364	F-box domain;Domain of unknown function
TRINITY_DN104682_c0_g1
TRINITY_DN104689_c0_g1	MF:structural constituent of ribosome;BP:translation;CC:ribosome	Ribosome	S:Function unknown	40S ribosomal protein S22 [Quercus suber] >XP_023882695.1 40S ribosomal protein S22 [Quercus suber]	PF01249	Ribosomal protein S21e
TRINITY_DN10469_c0_g1			O:Posttranslational modification, protein turnover, chaperones	PREDICTED: protease Do-like 2, chloroplastic isoform X4 [Lupinus angustifolius]	PF17815;PF13365;PF00089;PF13180	PDZ domain;Trypsin-like peptidase domain;Trypsin;PDZ domain
TRINITY_DN104691_c0_g1	BP:ubiquitin-dependent protein catabolic process;BP:protein deubiquitination;MF:thiol-dependent ubiquitinyl hydrolase activity		S:Function unknown	ubiquitin carboxyl-terminal hydrolase 4-like [Phoenix dactylifera]
TRINITY_DN104694_c0_g1	MF:structural constituent of ribosome;BP:translation;CC:ribosome	Ribosome	S:Function unknown	40S ribosomal protein S23 [Populus trichocarpa] >XP_002316341.1 40S ribosomal protein S23 [Populus trichocarpa] >XP_002323452.1 40S ribosomal protein S23 [Populus trichocarpa] >XP_006381492.1 40S ribosomal protein S23 [Populus trichocarpa] >XP_011024130.1 PREDICTED: 40S ribosomal protein S23 [Populus euphratica] >XP_011027009.1 PREDICTED: 40S ribosomal protein S23 [Populus euphratica] >XP_0110041…	PF00410	Ribosomal protein S8
TRINITY_DN1047_c0_g1	BP:regulation of transcription, DNA-templated;CC:nucleus;BP:auxin-activated signaling pathway;MF:DNA binding	Plant hormone signal transduction	K:Transcription	Auxin response factor 17 [Spatholobus suberectus]	PF06507;PF02362	Auxin response factor;B3 DNA binding domain
TRINITY_DN10470_c0_g1	BP:oxylipin biosynthetic process;MF:metal ion binding;MF:oxidoreductase activity, acting on single donors with incorporation of molecular oxygen, incorporation of two atoms of oxygen	Linoleic acid metabolism	S:Function unknown;O:Posttranslational modification, protein turnover, chaperones	PREDICTED: seed linoleate 9S-lipoxygenase-2-like [Lupinus angustifolius] >XP_019443512.1 PREDICTED: seed linoleate 9S-lipoxygenase-2-like [Lupinus angustifolius] >OIW11835.1 hypothetical protein TanjilG_14647 [Lupinus angustifolius]
TRINITY_DN10471_c0_g1	BP:peptidyl-diphthamide biosynthetic process from peptidyl-histidine;MF:diphthine synthase activity		J:Translation, ribosomal structure and biogenesis	PREDICTED: probable diphthine methyl ester synthase [Lupinus angustifolius] >OIW20621.1 hypothetical protein TanjilG_17068 [Lupinus angustifolius]	PF00590	Tetrapyrrole
TRINITY_DN104712_c0_g1	MF:zinc ion binding		S:Function unknown	zinc finger protein ZPR1 [Jatropha curcas] >KDP35750.1 hypothetical protein JCGZ_10522 [Jatropha curcas]	PF03367	ZPR1 zinc-finger domain
TRINITY_DN10472_c0_g1			S:Function unknown	PREDICTED: protein FAM136A-like [Lupinus angustifolius] >XP_019419740.1 PREDICTED: protein FAM136A-like [Lupinus angustifolius] >OIV95496.1 hypothetical protein TanjilG_23227 [Lupinus angustifolius]	PF05811	Eukaryotic protein of unknown function
TRINITY_DN10473_c0_g1			S:Function unknown	PREDICTED: uncharacterized protein LOC109351726 [Lupinus angustifolius]	PF04520	Senescence regulator
TRINITY_DN104739_c0_g1	CC:nucleus;MF:DNA binding		S:Function unknown	hypothetical protein TanjilG_14996 [Lupinus angustifolius]
TRINITY_DN10474_c0_g1			Z:Cytoskeleton	PREDICTED: protein IQ-DOMAIN 1-like [Lupinus angustifolius] >XP_019443055.1 PREDICTED: protein IQ-DOMAIN 1-like [Lupinus angustifolius] >OIW12128.1 hypothetical protein TanjilG_02349 [Lupinus angustifolius]
TRINITY_DN104742_c0_g1	CC:integral component of membrane		S:Function unknown	PREDICTED: protein YLS3-like isoform X2 [Lupinus angustifolius]	PF14368	Probable lipid transfer
TRINITY_DN104758_c0_g1	CC:retrotransposon nucleocapsid;BP:DNA integration;MF:methylmalonate-semialdehyde dehydrogenase ;MF:zinc ion binding;MF:nucleic acid binding		S:Function unknown;L:Replication, recombination and repair	PREDICTED: LOW QUALITY PROTEIN: uncharacterized protein LOC109326276 [Lupinus angustifolius]
TRINITY_DN10476_c0_g1	MF:histone binding;MF:RNA polymerase II C-terminal domain phosphoserine binding;BP:DNA methylation on cytosine;CC:cytosol;CC:Cdc73/Paf1 complex;MF:DNA binding;BP:regulation of chromatin silencing by small RNA;MF:metal ion binding;CC:nucleus		B:Chromatin structure and dynamics	PREDICTED: zinc finger CCCH domain-containing protein 19 isoform X4 [Lupinus angustifolius]	PF03126;PF02201;PF02213;PF13771;PF00642	Plus-3 domain;SWIB/MDM2 domain;GYF domain;PHD-like zinc-binding domain;Zinc finger C-x8-C-x5-C-x3-H type
TRINITY_DN104762_c0_g1	CC:integral component of membrane			hypothetical protein TanjilG_12013 [Lupinus angustifolius]
TRINITY_DN104769_c0_g1	BP:poly;BP:regulation of gene silencing;BP:root development;CC:nucleus;BP:ethylene-activated signaling pathway		L:Replication, recombination and repair	PCI/PINT associated module [Parasponia andersonii]
TRINITY_DN10477_c0_g1	BP:stamen development;BP:oxylipin biosynthetic process;MF:12-oxophytodienoate reductase activity;BP:response to fungus;CC:peroxisome;BP:jasmonic acid biosynthetic process;BP:response to ozone;MF:FMN binding;MF:oxidoreductase activity	alpha-Linolenic acid metabolism	C:Energy production and conversion	PREDICTED: 12-oxophytodienoate reductase 3-like [Lupinus angustifolius] >OIV99726.1 hypothetical protein TanjilG_26064 [Lupinus angustifolius]	PF00724	NADH
TRINITY_DN104778_c0_g1	MF:heme binding;BP:response to oxidative stress;CC:extracellular region;BP:hydrogen peroxide catabolic process;MF:metal ion binding;MF:peroxidase activity	Phenylpropanoid biosynthesis	G:Carbohydrate transport and metabolism;G:Carbohydrate transport and metabolism	PREDICTED: peroxidase 4-like [Lupinus angustifolius] >OIV95645.1 hypothetical protein TanjilG_01439 [Lupinus angustifolius]	PF00141	Peroxidase
TRINITY_DN104779_c0_g1	CC:integral component of membrane;MF:lipid binding		U:Intracellular trafficking, secretion, and vesicular transport;U:Intracellular trafficking, secretion, and vesicular transport	hypothetical protein TanjilG_10169 [Lupinus angustifolius]
TRINITY_DN10478_c0_g1	BP:chaperone mediated protein folding requiring cofactor;CC:cytosol;MF:chaperone binding;BP:protein folding;MF:unfolded protein binding		O:Posttranslational modification, protein turnover, chaperones	PREDICTED: dnaJ homolog subfamily B member 4 isoform X1 [Lupinus angustifolius] >OIV96510.1 hypothetical protein TanjilG_07902 [Lupinus angustifolius]	PF01556;PF00226	DnaJ C terminal domain;DnaJ domain
TRINITY_DN104785_c0_g1	BP:mitotic cell cycle;BP:DNA repair;CC:centrosome;CC:centriole;MF:calcium ion binding;BP:centriole replication		S:Function unknown	predicted protein [Hordeum vulgare subsp. vulgare]	PF00036;PF13405;PF13499;PF13202;PF14658;PF13833	EF hand;EF-hand domain;EF-hand domain pair;EF hand;EF-hand domain;EF-hand domain pair
TRINITY_DN104796_c0_g1	MF:RNA-DNA hybrid ribonuclease activity;MF:nucleic acid binding			PREDICTED: uncharacterized protein LOC109336933 [Lupinus angustifolius]
TRINITY_DN1048_c0_g1				uncharacterized protein LOC111994105 [Quercus suber]	PF08137	DVL family
TRINITY_DN10480_c0_g1
TRINITY_DN10481_c0_g1	CC:Golgi apparatus;CC:Sec61 translocon complex;BP:intracellular protein transport;MF:ARF guanyl-nucleotide exchange factor activity;CC:plasma membrane;BP:posttranslational protein targeting to membrane, translocation;CC:endoplasmic reticulum Sec complex;BP:SRP-dependent cotranslational protein targeting to membrane, translocation;CC:integral component of membrane	Phagosome;Protein export;Protein processing in endoplasmic reticulum	D:Cell cycle control, cell division, chromosome partitioning	PREDICTED: protein transport protein Sec61 subunit beta-like [Lupinus angustifolius] >XP_019447900.1 PREDICTED: protein transport protein Sec61 subunit beta-like [Lupinus angustifolius] >OIW09151.1 hypothetical protein TanjilG_11289 [Lupinus angustifolius]	PF03911	Sec61beta family
TRINITY_DN104810_c0_g1	MF:structural constituent of ribosome;BP:cytoplasmic translation;CC:ribosome;BP:translation;CC:cytosolic large ribosomal subunit	Ribosome	P:Inorganic ion transport and metabolism	uncharacterized protein LOC100306335 [Glycine max] >XP_028233779.1 60S ribosomal protein L31-like [Glycine soja] >ACU14462.1 unknown [Glycine max] >KHM99833.1 60S ribosomal protein L31 [Glycine soja] >KRH60160.1 hypothetical protein GLYMA_05G223800 [Glycine max] >RZC13796.1 60S ribosomal protein L31 [Glycine soja]	PF01198	Ribosomal protein L31e
TRINITY_DN104819_c0_g1	CC:cytoplasm;CC:nuclear speck;BP:regulation of alternative mRNA splicing, via spliceosome;BP:mRNA cis splicing, via spliceosome;MF:RNA binding;CC:nucleus		S:Function unknown	hypothetical protein TanjilG_07824 [Lupinus angustifolius]
TRINITY_DN10482_c0_g1			S:Function unknown	hypothetical protein TanjilG_17462 [Lupinus angustifolius]
TRINITY_DN10482_c0_g2	BP:reciprocal meiotic recombination		S:Function unknown	PREDICTED: WEB family protein At3g02930, chloroplastic-like isoform X2 [Lupinus angustifolius]	PF05701	Weak chloroplast movement under blue light
TRINITY_DN10483_c0_g1	CC:integral component of membrane;MF:cation transmembrane transporter activity		P:Inorganic ion transport and metabolism	hypothetical protein TanjilG_32849 [Lupinus angustifolius]
TRINITY_DN104832_c0_g1	MF:structural constituent of ribosome;CC:cytosolic large ribosomal subunit;BP:translation;CC:ribosome	Ribosome	P:Inorganic ion transport and metabolism	60S ribosomal protein L4 [Amborella trichopoda] >ERN00014.1 hypothetical protein AMTR_s00105p00023120 [Amborella trichopoda]	PF00832	Ribosomal L39 protein
TRINITY_DN10484_c0_g1	CC:nucleus;MF:zinc ion binding;MF:DNA binding		K:Transcription	hypothetical protein TanjilG_08015 [Lupinus angustifolius]
TRINITY_DN104841_c0_g1	MF:calcium ion binding;BP:calcium-mediated signaling		P:Inorganic ion transport and metabolism	unknown [Picea sitchensis]	PF00036;PF13405;PF13499	EF hand;EF-hand domain;EF-hand domain pair
TRINITY_DN10485_c0_g1	CC:nucleus;MF:DNA binding			PREDICTED: B3 domain-containing protein Os04g0386900-like [Lupinus angustifolius]	PF02362	B3 DNA binding domain
TRINITY_DN10486_c0_g1	BP:protein ubiquitination;BP:ubiquitin-dependent protein catabolic process;BP:SCF-dependent proteasomal ubiquitin-dependent protein catabolic process;CC:SCF ubiquitin ligase complex		S:Function unknown;S:Function unknown	hypothetical protein TanjilG_02583 [Lupinus angustifolius]
TRINITY_DN104862_c0_g1		Nitrogen metabolism	P:Inorganic ion transport and metabolism
TRINITY_DN10487_c0_g1	CC:cytoplasm;MF:signaling receptor activity;CC:nucleus;BP:abscisic acid-activated signaling pathway;BP:regulation of protein serine/threonine phosphatase activity;MF:protein phosphatase inhibitor activity;MF:abscisic acid binding;MF:protein homodimerization activity	MAPK signaling pathway - plant;Plant hormone signal transduction	S:Function unknown	PREDICTED: abscisic acid receptor PYL2-like [Lupinus angustifolius] >OIW19818.1 hypothetical protein TanjilG_24521 [Lupinus angustifolius]
TRINITY_DN10487_c0_g2	CC:integral component of membrane		S:Function unknown	PREDICTED: putative leucine-rich repeat receptor-like serine/threonine-protein kinase At2g14440 isoform X2 [Vigna angularis] >BAT98876.1 hypothetical protein VIGAN_10023500 [Vigna angularis var. angularis]
TRINITY_DN104873_c0_g1	MF:structural constituent of ribosome;BP:translation;CC:ribosome	Ribosome	P:Inorganic ion transport and metabolism	PREDICTED: 60S ribosomal protein L38-like [Daucus carota subsp. sativus]	PF01781	Ribosomal L38e protein family
TRINITY_DN10488_c0_g1			S:Function unknown;S:Function unknown	PREDICTED: uncharacterized protein LOC109353751 [Lupinus angustifolius] >OIW07021.1 hypothetical protein TanjilG_02655 [Lupinus angustifolius]	PF05553	Cotton fibre expressed protein
TRINITY_DN10489_c0_g1	BP:cellular response to chitin;CC:integral component of membrane;CC:plasma membrane;MF:chitin binding;MF:protein kinase activity;BP:innate immune response;MF:ATP binding;MF:protein homodimerization activity		T:Signal transduction mechanisms	PREDICTED: LOW QUALITY PROTEIN: protein LYK5 [Lupinus angustifolius]	PF00069;PF07714;PF01476;PF08693	Protein kinase domain;Protein tyrosine kinase;LysM domain;Transmembrane alpha-helix domain
TRINITY_DN1049_c0_g1	CC:chloroplast envelope;BP:sodium ion import across plasma membrane;BP:potassium ion transmembrane transport;CC:integral component of membrane;MF:solute;CC:plasma membrane;BP:regulation of intracellular pH;MF:potassium;MF:sodium		P:Inorganic ion transport and metabolism	PREDICTED: sodium/hydrogen exchanger 8 isoform X2 [Lupinus angustifolius]	PF00999;PF00027	Sodium/hydrogen exchanger family;Cyclic nucleotide-binding domain
TRINITY_DN10491_c0_g1			S:Function unknown	PREDICTED: uncharacterized protein LOC109327078 [Lupinus angustifolius] >OIV97660.1 hypothetical protein TanjilG_12417 [Lupinus angustifolius]	PF04788	Protein of unknown function
TRINITY_DN10491_c0_g3			S:Function unknown	uncharacterized protein LOC113846601 [Abrus precatorius]	PF04788	Protein of unknown function
TRINITY_DN10491_c0_g4			S:Function unknown	PREDICTED: uncharacterized protein LOC109338956 [Lupinus angustifolius] >OIW20852.1 hypothetical protein TanjilG_24930 [Lupinus angustifolius]	PF04788	Protein of unknown function
TRINITY_DN10491_c2_g1			S:Function unknown	hypothetical protein TanjilG_08203 [Lupinus angustifolius]	PF04788	Protein of unknown function
TRINITY_DN104919_c0_g1				PREDICTED: uncharacterized protein LOC109339849, partial [Lupinus angustifolius]
TRINITY_DN10492_c0_g1	MF:hydrolase activity;MF:NADP-retinol dehydrogenase activity;BP:phosphatidylinositol dephosphorylation		S:Function unknown	PREDICTED: dehydrogenase/reductase SDR family member 12 [Lupinus angustifolius]	PF00106;PF13561;PF08659	short chain dehydrogenase;Enoyl-;KR domain
TRINITY_DN10492_c0_g2	MF:DNA-directed DNA polymerase activity;MF:RNA-directed DNA polymerase activity;MF:tetrahydrofolylpolyglutamate synthase activity;MF:ATP binding		S:Function unknown;S:Function unknown;S:Function unknown	PREDICTED: uncharacterized protein LOC109348116 [Lupinus angustifolius] >XP_019443891.1 PREDICTED: uncharacterized protein LOC109348116 [Lupinus angustifolius] >XP_019443892.1 PREDICTED: uncharacterized protein LOC109348116 [Lupinus angustifolius] >OIW11570.1 hypothetical protein TanjilG_26936 [Lupinus angustifolius]	PF08744	Plant transcription factor NOZZLE
TRINITY_DN10492_c1_g1	CC:transport vesicle membrane;CC:integral component of membrane;MF:GTPase activity;MF:DNA-directed DNA polymerase activity;CC:plasma membrane;BP:protein transport;MF:translation elongation factor activity;MF:GTP binding	RNA transport	S:Function unknown	elongation factor 1-alpha [Medicago truncatula]
TRINITY_DN10492_c2_g1	MF:metal ion binding		S:Function unknown	PREDICTED: protein DA1-related 1-like [Lupinus angustifolius] >XP_019432108.1 PREDICTED: protein DA1-related 1-like [Lupinus angustifolius] >OIW20988.1 hypothetical protein TanjilG_26782 [Lupinus angustifolius]	PF12315	Protein DA1
TRINITY_DN10492_c3_g1	MF:GTP binding		S:Function unknown	hypothetical protein Ahy_B01g055122 isoform A [Arachis hypogaea]	PF00025;PF09439;PF08477;PF04670;PF00071	ADP-ribosylation factor family;Signal recognition particle receptor beta subunit;Ras of Complex, Roc, domain of DAPkinase;Gtr1/RagA G protein conserved region;Ras family
TRINITY_DN10493_c0_g1	CC:Golgi apparatus;MF:antiporter activity;MF:triose-phosphate transmembrane transporter activity;CC:integral component of membrane;MF:phosphoglycerate transmembrane transporter activity;MF:transmembrane transporter activity	Cyanoamino acid metabolism;Starch and sucrose metabolism;Phenylpropanoid biosynthesis	S:Function unknown	PREDICTED: glucose-6-phosphate/phosphate translocator 2, chloroplastic-like [Lupinus angustifolius]	PF03151;PF00892;PF08449	Triose-phosphate Transporter family;EamA-like transporter family;UAA transporter family
TRINITY_DN10494_c0_g1	MF:tetrahydroberberine oxidase activity;MF:FAD binding;MF:oxidoreductase activity	Starch and sucrose metabolism;Galactose metabolism	C:Energy production and conversion	PREDICTED: berberine bridge enzyme-like 21 [Lupinus angustifolius] >OIV95979.1 hypothetical protein TanjilG_27083 [Lupinus angustifolius]	PF01565;PF08031	FAD binding domain;Berberine and berberine like
TRINITY_DN10495_c0_g1	CC:Golgi apparatus;MF:antiporter activity;CC:integral component of membrane;MF:nucleotide-sugar transmembrane transporter activity;BP:carbohydrate transport;MF:transmembrane transporter activity		S:Function unknown	PREDICTED: solute carrier family 35 member E3-like isoform X1 [Lupinus angustifolius] >XP_019431128.1 PREDICTED: solute carrier family 35 member E3-like isoform X2 [Lupinus angustifolius]	PF03151	Triose-phosphate Transporter family
TRINITY_DN10496_c0_g1	MF:proline dehydrogenase activity;CC:mitochondrion;BP:proline catabolic process to glutamate;BP:proline catabolic process;MF:FAD binding	Arginine and proline metabolism	E:Amino acid transport and metabolism	proline dehydrogenase 2, mitochondrial-like, partial [Cajanus cajan]	PF01619	Proline dehydrogenase
[truncated: 53,537 more rows]
