# Supplementary material for: Comparative transcriptome analysis of Lupinus polyphyllus Lindl. provides a rich molecular resource for research on coloration mechanism
Source: PeerJ. 2022 Aug 2;10:e13836. doi: 10.7717/peerj.13836 (PMC9354738; doi:10.7717/peerj.13836)
Supplement: Supplemental Information 4 — The KEGG classification statistical table of annotated unigenes. [file peerj-10-13836-s004.xlsx]

## Sheet: Supplementary Table 3
Supplementary Table 3 KEGG analysis. The KEGG classification statistical table of annotated unigenes.
Pathway	First Category	Second Category	Pathway_definition	num_of_seqs	seqs_kos/gene_list	pathway_imagename	Hyperlink
map00010	Metabolism	Carbohydrate metabolism	Glycolysis / Gluconeogenesis	336	TRINITY_DN36607_c0_g1;TRINITY_DN87991_c0_g2;TRINITY_DN51426_c0_g2;TRINITY_DN34016_c0_g1;TRINITY_DN72079_c0_g1;TRINITY_DN67346_c0_g1;TRINITY_DN3245_c0_g1;TRINITY_DN73017_c0_g1;TRINITY_DN27031_c0_g1;TRINITY_DN56963_c1_g5;TRINITY_DN28903_c0_g1;TRINITY_DN38378_c0_g1;TRINITY_DN8950_c1_g2;TRINITY_DN8950_c1_g1;TRINITY_DN8950_c0_g1;TRINITY_DN3721_c0_g1;TRINITY_DN95161_c0_g1;TRINITY_DN95604_c0_g1;TRINITY_…	map00010.png	http://www.genome.jp/dbget-bin/show_pathway?map00010/K00850%09green/K02469%09green/K01689%09green/K14085%09green/K00895%09green/K18857%09green/K01623%09green/K01810%09green/K00873%09green/K03103%09green/K00134%09green/K00131%09green/K01835%09green/K01834%09green/K00627%09green/K01895%09green/K00016%09green/K00844%09green/K01792%09green/K01596%09green/K03841%09green/K01610%09green/K00927%09green/K…
map00020	Metabolism	Carbohydrate metabolism	Citrate cycle (TCA cycle)	181	TRINITY_DN72610_c0_g1;TRINITY_DN33985_c0_g2;TRINITY_DN34016_c0_g1;TRINITY_DN92922_c0_g1;TRINITY_DN91695_c0_g1;TRINITY_DN28903_c0_g1;TRINITY_DN23069_c0_g1;TRINITY_DN8933_c1_g1;TRINITY_DN8933_c0_g1;TRINITY_DN8933_c0_g3;TRINITY_DN8988_c0_g1;TRINITY_DN27527_c0_g1;TRINITY_DN21541_c0_g1;TRINITY_DN2733_c0_g2;TRINITY_DN83284_c0_g4;TRINITY_DN83284_c0_g5;TRINITY_DN83284_c0_g1;TRINITY_DN83284_c0_g2;TRINITY_…	map00020.png	http://www.genome.jp/dbget-bin/show_pathway?map00020/K02469%09green/K01681%09green/K01648%09green/K00627%09green/K01647%09green/K01899%09green/K00030%09green/K00031%09green/K00382%09green/K01679%09green/K01596%09green/K01900%09green/K01610%09green/K00658%09green/K00164%09green/K00161%09green/K00162%09green/K00234%09green/K00235%09green/K00236%09green/K00025%09green/K00026%09green
map00030	Metabolism	Carbohydrate metabolism	Pentose phosphate pathway	170	TRINITY_DN87991_c0_g2;TRINITY_DN3245_c0_g1;TRINITY_DN23312_c0_g1;TRINITY_DN38290_c0_g1;TRINITY_DN38378_c0_g1;TRINITY_DN8937_c0_g1;TRINITY_DN27659_c0_g1;TRINITY_DN47258_c0_g1;TRINITY_DN81381_c0_g1;TRINITY_DN46335_c0_g1;TRINITY_DN27891_c0_g1;TRINITY_DN91510_c0_g1;TRINITY_DN61123_c0_g1;TRINITY_DN38784_c0_g1;TRINITY_DN20199_c0_g2;TRINITY_DN50436_c0_g1;TRINITY_DN76766_c0_g1;TRINITY_DN59127_c0_g2;TRINI…	map00030.png	http://www.genome.jp/dbget-bin/show_pathway?map00030/K03841%09green/K00850%09green/K00851%09green/K00852%09green/K01835%09green/K01810%09green/K01783%09green/K00895%09green/K01807%09green/K00948%09green/K01623%09green/K00616%09green/K00131%09green/K00615%09green/K00036%09green/K01057%09green/K00033%09green
map00040	Metabolism	Carbohydrate metabolism	Pentose and glucuronate interconversions	233	TRINITY_DN16703_c1_g1;TRINITY_DN16703_c0_g1;TRINITY_DN36641_c0_g1;TRINITY_DN67440_c0_g1;TRINITY_DN37706_c0_g1;TRINITY_DN45206_c0_g1;TRINITY_DN64886_c0_g1;TRINITY_DN64886_c0_g3;TRINITY_DN99560_c0_g1;TRINITY_DN7916_c0_g1;TRINITY_DN8923_c0_g1;TRINITY_DN3798_c1_g1;TRINITY_DN3798_c0_g1;TRINITY_DN3798_c0_g2;TRINITY_DN3751_c0_g1;TRINITY_DN3751_c0_g2;TRINITY_DN3751_c0_g3;TRINITY_DN27675_c0_g1;TRINITY_DN4…	map00040.png	http://www.genome.jp/dbget-bin/show_pathway?map00040/K00854%09green/K01184%09green/K16190%09green/K00963%09green/K14638%09green/K00085%09green/K01213%09green/K01805%09green/K01051%09green/K01783%09green/K12447%09green/K00011%09green/K00012%09green/K02912%09green/K01728%09green/K00008%09green
map00051	Metabolism	Carbohydrate metabolism	Fructose and mannose metabolism	155	TRINITY_DN16659_c0_g1;TRINITY_DN87991_c0_g2;TRINITY_DN34056_c1_g1;TRINITY_DN3245_c0_g1;TRINITY_DN66142_c0_g1;TRINITY_DN38378_c0_g1;TRINITY_DN3721_c0_g1;TRINITY_DN3767_c0_g1;TRINITY_DN95161_c0_g1;TRINITY_DN46335_c0_g1;TRINITY_DN22439_c0_g1;TRINITY_DN13195_c0_g2;TRINITY_DN91510_c0_g1;TRINITY_DN21581_c0_g1;TRINITY_DN580_c0_g1;TRINITY_DN61123_c0_g1;TRINITY_DN38784_c0_g1;TRINITY_DN50436_c0_g1;TRINITY_…	map00051.png	http://www.genome.jp/dbget-bin/show_pathway?map00051/K18447%09green/K00966%09green/K03841%09green/K02377%09green/K00844%09green/K01809%09green/K01103%09green/K01803%09green/K00895%09green/K05305%09green/K01805%09green/K01711%09green/K01623%09green/K19355%09green/K00847%09green/K00011%09green/K00850%09green/K00863%09green/K00008%09green/K00085%09green/K17497%09green
map00052	Metabolism	Carbohydrate metabolism	Galactose metabolism	156	TRINITY_DN27784_c0_g1;TRINITY_DN9527_c0_g1;TRINITY_DN72079_c0_g1;TRINITY_DN67440_c0_g1;TRINITY_DN27031_c0_g1;TRINITY_DN99560_c0_g1;TRINITY_DN7999_c0_g1;TRINITY_DN46328_c0_g2;TRINITY_DN22439_c0_g1;TRINITY_DN13151_c0_g1;TRINITY_DN13188_c0_g1;TRINITY_DN91510_c0_g1;TRINITY_DN21581_c0_g1;TRINITY_DN2707_c1_g1;TRINITY_DN37632_c0_g1;TRINITY_DN46834_c1_g2;TRINITY_DN46834_c0_g1;TRINITY_DN47664_c0_g1;TRINIT…	map00052.png	http://www.genome.jp/dbget-bin/show_pathway?map00052/K01193%09green/K01190%09green/K00850%09green/K06611%09green/K01187%09green/K00963%09green/K01835%09green/K00085%09green/K00844%09green/K18819%09green/K12309%09green/K00011%09green/K01785%09green/K01784%09green/K12447%09green/K07407%09green/K00965%09green/K06617%09green
map00053	Metabolism	Carbohydrate metabolism	Ascorbate and aldarate metabolism	138	TRINITY_DN36641_c0_g1;TRINITY_DN67440_c0_g1;TRINITY_DN91708_c0_g1;TRINITY_DN37706_c0_g1;TRINITY_DN199_c0_g1;TRINITY_DN27675_c0_g1;TRINITY_DN27660_c1_g1;TRINITY_DN27660_c0_g1;TRINITY_DN27660_c1_g4;TRINITY_DN46260_c0_g2;TRINITY_DN46328_c0_g2;TRINITY_DN25759_c0_g2;TRINITY_DN550_c0_g1;TRINITY_DN38740_c1_g1;TRINITY_DN38740_c0_g1;TRINITY_DN15803_c1_g1;TRINITY_DN15803_c0_g1;TRINITY_DN22630_c0_g1;TRINITY…	map00053.png	http://www.genome.jp/dbget-bin/show_pathway?map00053/K00469%09green/K17744%09green/K18649%09green/K16190%09green/K14190%09green/K08232%09green/K00225%09green/K10047%09green/K00128%09green/K12447%09green/K00012%09green/K14085%09green/K10046%09green/K00423%09green/K00434%09green
map00500	Metabolism	Carbohydrate metabolism	Starch and sucrose metabolism	391	TRINITY_DN30154_c0_g1;TRINITY_DN16646_c0_g1;TRINITY_DN27784_c0_g1;TRINITY_DN36594_c0_g1;TRINITY_DN92316_c0_g1;TRINITY_DN50192_c0_g1;TRINITY_DN33972_c0_g1;TRINITY_DN9527_c0_g1;TRINITY_DN27104_c0_g1;TRINITY_DN99560_c0_g1;TRINITY_DN8951_c0_g1;TRINITY_DN22439_c0_g1;TRINITY_DN12701_c1_g2;TRINITY_DN12701_c1_g1;TRINITY_DN12701_c0_g1;TRINITY_DN12605_c0_g1;TRINITY_DN27860_c0_g1;TRINITY_DN48155_c0_g1;TRINI…	map00500.png	http://www.genome.jp/dbget-bin/show_pathway?map00500/K19964%09green/K00975%09green/K01177%09green/K01179%09green/K16055%09green/K13679%09green/K01810%09green/K19892%09green/K12598%09green/K18447%09green/K01176%09green/K01187%09green/K00700%09green/K01188%09green/K00703%09green/K00705%09green/K00688%09green/K05350%09green/K01214%09green/K01087%09green/K00847%09green/K19893%09green/K18677%09green/K…
map00520	Metabolism	Carbohydrate metabolism	Amino sugar and nucleotide sugar metabolism	364	TRINITY_DN16646_c0_g1;TRINITY_DN8294_c0_g1;TRINITY_DN8294_c0_g3;TRINITY_DN36594_c0_g1;TRINITY_DN36639_c1_g1;TRINITY_DN36639_c0_g1;TRINITY_DN36641_c0_g1;TRINITY_DN50188_c0_g1;TRINITY_DN93957_c0_g1;TRINITY_DN93957_c0_g2;TRINITY_DN34056_c1_g1;TRINITY_DN67440_c0_g1;TRINITY_DN37706_c0_g1;TRINITY_DN66142_c0_g1;TRINITY_DN33595_c0_g1;TRINITY_DN16332_c0_g1;TRINITY_DN28907_c0_g1;TRINITY_DN199_c0_g1;TRINITY…	map00520.png	http://www.genome.jp/dbget-bin/show_pathway?map00520/K00972%09green/K01836%09green/K02377%09green/K00975%09green/K04733%09green/K12373%09green/K02564%09green/K09422%09green/K01810%09green/K00621%09green/K12451%09green/K12450%09green/K01183%09green/K18677%09green/K08678%09green/K08679%09green/K00844%09green/K00012%09green/K05305%09green/K17497%09green/K00965%09green/K00966%09green/K00847%09green/K…
map00620	Metabolism	Carbohydrate metabolism	Pyruvate metabolism	257	TRINITY_DN8204_c0_g1;TRINITY_DN44282_c0_g1;TRINITY_DN34016_c0_g1;TRINITY_DN56339_c0_g1;TRINITY_DN92922_c0_g1;TRINITY_DN91695_c0_g1;TRINITY_DN50968_c0_g1;TRINITY_DN56963_c1_g5;TRINITY_DN28903_c0_g1;TRINITY_DN7957_c0_g1;TRINITY_DN27527_c0_g1;TRINITY_DN65819_c0_g1;TRINITY_DN48082_c0_g2;TRINITY_DN2733_c0_g2;TRINITY_DN2725_c0_g1;TRINITY_DN83284_c0_g4;TRINITY_DN83284_c0_g5;TRINITY_DN83284_c0_g1;TRINITY…	map00620.png	http://www.genome.jp/dbget-bin/show_pathway?map00620/K01961%09green/K02469%09green/K01649%09green/K14085%09green/K00873%09green/K11262%09green/K00627%09green/K00626%09green/K00051%09green/K01895%09green/K00016%09green/K18881%09green/K01069%09green/K01006%09green/K01679%09green/K01512%09green/K01759%09green/K01596%09green/K01595%09green/K01963%09green/K01962%09green/K02160%09green/K01638%09green/K…
map00630	Metabolism	Carbohydrate metabolism	Glyoxylate and dicarboxylate metabolism	176	TRINITY_DN13927_c0_g1;TRINITY_DN50224_c0_g1;TRINITY_DN50224_c0_g2;TRINITY_DN9294_c0_g1;TRINITY_DN9593_c0_g1;TRINITY_DN92922_c0_g1;TRINITY_DN91695_c0_g1;TRINITY_DN16364_c0_g1;TRINITY_DN73033_c0_g1;TRINITY_DN175_c0_g1;TRINITY_DN7961_c0_g1;TRINITY_DN8973_c0_g1;TRINITY_DN8973_c0_g2;TRINITY_DN27527_c0_g1;TRINITY_DN27706_c0_g1;TRINITY_DN13114_c0_g1;TRINITY_DN21541_c0_g1;TRINITY_DN2733_c0_g2;TRINITY_DN2…	map00630.png	http://www.genome.jp/dbget-bin/show_pathway?map00630/K01455%09green/K15919%09green/K15918%09green/K11517%09green/K01601%09green/K01681%09green/K00600%09green/K00605%09green/K00830%09green/K01915%09green/K19269%09green/K01647%09green/K03781%09green/K00284%09green/K00281%09green/K00626%09green/K02437%09green/K01895%09green/K14272%09green/K01638%09green/K01637%09green/K01433%09green/K15893%09green/K…
map00640	Metabolism	Carbohydrate metabolism	Propanoate metabolism	82	TRINITY_DN44282_c0_g1;TRINITY_DN196_c0_g2;TRINITY_DN33250_c0_g1;TRINITY_DN48082_c0_g2;TRINITY_DN2733_c0_g2;TRINITY_DN46055_c0_g1;TRINITY_DN17620_c0_g1;TRINITY_DN104316_c0_g1;TRINITY_DN34722_c0_g2;TRINITY_DN3588_c0_g1;TRINITY_DN19039_c0_g1;TRINITY_DN63837_c1_g1;TRINITY_DN12560_c0_g1;TRINITY_DN8090_c1_g1;TRINITY_DN8090_c0_g1;TRINITY_DN8090_c0_g2;TRINITY_DN38197_c0_g1;TRINITY_DN94754_c0_g1;TRINITY_D…	map00640.png	http://www.genome.jp/dbget-bin/show_pathway?map00640/K02160%09green/K00140%09green/K00382%09green/K05605%09green/K00166%09green/K00167%09green/K00249%09green/K01900%09green/K01578%09green/K01962%09green/K01899%09green/K01961%09green/K01963%09green/K01895%09green/K11262%09green/K09699%09green/K00626%09green/K00016%09green
map00650	Metabolism	Carbohydrate metabolism	Butanoate metabolism	35	TRINITY_DN9269_c0_g1;TRINITY_DN3201_c0_g1;TRINITY_DN3789_c0_g1;TRINITY_DN3789_c0_g2;TRINITY_DN91556_c0_g1;TRINITY_DN101915_c0_g1;TRINITY_DN37506_c0_g1;TRINITY_DN70093_c1_g1;TRINITY_DN70093_c0_g1;TRINITY_DN12562_c0_g1;TRINITY_DN7751_c0_g1;TRINITY_DN7760_c0_g1;TRINITY_DN88794_c0_g1;TRINITY_DN18323_c0_g1;TRINITY_DN61547_c0_g1;TRINITY_DN46976_c0_g1;TRINITY_DN10820_c0_g1;TRINITY_DN23474_c2_g1;TRINITY_…	map00650.png	http://www.genome.jp/dbget-bin/show_pathway?map00650/K01641%09green/K00074%09green/K17761%09green/K18121%09green/K16871%09green/K00626%09green/K01580%09green/K00109%09green/K01640%09green/K01652%09green/K01653%09green
map00660	Metabolism	Carbohydrate metabolism	C5-Branched dibasic acid metabolism	27	TRINITY_DN23360_c0_g1;TRINITY_DN101915_c0_g1;TRINITY_DN36562_c0_g3;TRINITY_DN65595_c0_g1;TRINITY_DN89666_c0_g1;TRINITY_DN35756_c0_g1;TRINITY_DN12562_c0_g1;TRINITY_DN7751_c0_g1;TRINITY_DN18323_c0_g1;TRINITY_DN10191_c0_g1;TRINITY_DN14615_c0_g1;TRINITY_DN16711_c0_g1;TRINITY_DN16711_c0_g3;TRINITY_DN13402_c0_g1;TRINITY_DN13402_c0_g2;TRINITY_DN13402_c0_g3;TRINITY_DN3137_c2_g1;TRINITY_DN34970_c0_g1;TRIN…	map00660.png	http://www.genome.jp/dbget-bin/show_pathway?map00660/K01653%09green/K01652%09green/K01703%09green/K00052%09green/K01704%09green
map00562	Metabolism	Carbohydrate metabolism	Inositol phosphate metabolism	225	TRINITY_DN72680_c0_g1;TRINITY_DN88003_c0_g1;TRINITY_DN88003_c0_g3;TRINITY_DN32787_c0_g1;TRINITY_DN34032_c0_g1;TRINITY_DN9542_c0_g1;TRINITY_DN72024_c2_g1;TRINITY_DN50939_c0_g1;TRINITY_DN113_c0_g1;TRINITY_DN67113_c0_g1;TRINITY_DN18634_c0_g1;TRINITY_DN18667_c0_g1;TRINITY_DN85599_c0_g1;TRINITY_DN3721_c0_g1;TRINITY_DN95161_c0_g1;TRINITY_DN2788_c0_g1;TRINITY_DN589_c0_g1;TRINITY_DN589_c0_g2;TRINITY_DN39…	map00562.png	http://www.genome.jp/dbget-bin/show_pathway?map00562/K19517%09green/K00999%09green/K18649%09green/K01110%09green/K10572%09green/K01114%09green/K00915%09green/K00914%09green/K01858%09green/K00913%09green/K03103%09green/K05860%09green/K00469%09green/K00889%09green/K00888%09green/K01106%09green/K05857%09green/K00921%09green/K10047%09green/K00140%09green/K01092%09green/K01803%09green/K01099%09green/K…
map00190	Metabolism	Energy metabolism	Oxidative phosphorylation	430	TRINITY_DN76250_c0_g1;TRINITY_DN32803_c0_g1;TRINITY_DN32803_c0_g2;TRINITY_DN9539_c0_g1;TRINITY_DN9539_c0_g2;TRINITY_DN79501_c0_g1;TRINITY_DN67425_c0_g1;TRINITY_DN3284_c0_g1;TRINITY_DN37766_c0_g1;TRINITY_DN66169_c0_g2;TRINITY_DN16394_c0_g1;TRINITY_DN16394_c0_g2;TRINITY_DN63474_c0_g1;TRINITY_DN23295_c0_g1;TRINITY_DN28933_c1_g2;TRINITY_DN28933_c1_g1;TRINITY_DN156_c1_g1;TRINITY_DN156_c0_g1;TRINITY_DN…	map00190.png	http://www.genome.jp/dbget-bin/show_pathway?map00190/K02256%09green/K02257%09green/K02258%09green/K02259%09green/K02155%09green/K02154%09green/K02153%09green/K02152%09green/K02151%09green/K02150%09green/K03949%09green/K03948%09green/K03943%09green/K03942%09green/K03941%09green/K03940%09green/K03946%09green/K00416%09green/K02128%09green/K02129%09green/K11353%09green/K11352%09green/K02126%09green/K…
map00195	Metabolism	Energy metabolism	Photosynthesis	92	TRINITY_DN8236_c0_g1;TRINITY_DN36589_c0_g1;TRINITY_DN9228_c1_g1;TRINITY_DN9228_c0_g1;TRINITY_DN67124_c0_g1;TRINITY_DN27926_c0_g1;TRINITY_DN52146_c0_g1;TRINITY_DN38004_c0_g1;TRINITY_DN83221_c0_g1;TRINITY_DN34548_c0_g1;TRINITY_DN76780_c0_g1;TRINITY_DN38422_c0_g1;TRINITY_DN22118_c0_g1;TRINITY_DN5918_c0_g1;TRINITY_DN5918_c0_g2;TRINITY_DN9699_c0_g1;TRINITY_DN6987_c1_g1;TRINITY_DN10287_c0_g1;TRINITY_DN…	map00195.png	http://www.genome.jp/dbget-bin/show_pathway?map00195/K02113%09green/K02695%09green/K02111%09green/K02690%09green/K02115%09green/K02693%09green/K02698%09green/K02699%09green/K02635%09green/K03043%09green/K03040%09green/K02692%09green/K02694%09green/K02703%09green/K02701%09green/K02641%09green/K02705%09green/K02709%09green/K02721%09green/K02723%09green/K03541%09green/K02689%09green/K02640%09green/K…
map00196	Metabolism	Energy metabolism	Photosynthesis - antenna proteins	45	TRINITY_DN93913_c1_g1;TRINITY_DN93913_c0_g1;TRINITY_DN65402_c0_g1;TRINITY_DN4428_c0_g1;TRINITY_DN4428_c0_g2;TRINITY_DN19050_c0_g1;TRINITY_DN5073_c1_g1;TRINITY_DN5015_c0_g1;TRINITY_DN5015_c0_g2;TRINITY_DN20386_c0_g1;TRINITY_DN46483_c1_g1;TRINITY_DN46483_c0_g2;TRINITY_DN17546_c0_g1;TRINITY_DN6045_c0_g1;TRINITY_DN46006_c0_g2;TRINITY_DN987_c2_g1;TRINITY_DN53702_c0_g2;TRINITY_DN36452_c0_g1;TRINITY_DN5…	map00196.png	http://www.genome.jp/dbget-bin/show_pathway?map00196/K08909%09green/K14172%09green/K08908%09green/K08914%09green/K08915%09green/K08907%09green/K08917%09green/K08916%09green/K08911%09green/K08910%09green/K08912%09green
map00710	Metabolism	Energy metabolism	Carbon fixation in photosynthetic organisms	225	TRINITY_DN8204_c0_g1;TRINITY_DN36607_c0_g1;TRINITY_DN87991_c0_g2;TRINITY_DN51426_c0_g2;TRINITY_DN56339_c0_g1;TRINITY_DN92922_c0_g1;TRINITY_DN91695_c0_g1;TRINITY_DN3245_c0_g1;TRINITY_DN50968_c0_g1;TRINITY_DN73017_c0_g1;TRINITY_DN23312_c0_g1;TRINITY_DN38378_c0_g1;TRINITY_DN27527_c0_g1;TRINITY_DN3721_c0_g1;TRINITY_DN95161_c0_g1;TRINITY_DN27712_c2_g1;TRINITY_DN27712_c0_g1;TRINITY_DN27659_c0_g1;TRINIT…	map00710.png	http://www.genome.jp/dbget-bin/show_pathway?map00710/K00855%09green/K00927%09green/K01623%09green/K01602%09green/K03841%09green/K01601%09green/K00134%09green/K14455%09green/K14454%09green/K00051%09green/K05298%09green/K01783%09green/K01006%09green/K01100%09green/K14272%09green/K01610%09green/K00615%09green/K01803%09green/K01807%09green/K01595%09green/K00029%09green/K00028%09green/K00025%09green/K…
map00910	Metabolism	Energy metabolism	Nitrogen metabolism	75	TRINITY_DN67417_c0_g1;TRINITY_DN67417_c0_g2;TRINITY_DN3204_c0_g1;TRINITY_DN128_c0_g1;TRINITY_DN99483_c0_g1;TRINITY_DN13114_c0_g1;TRINITY_DN90388_c1_g1;TRINITY_DN23414_c0_g1;TRINITY_DN22674_c0_g1;TRINITY_DN103108_c0_g1;TRINITY_DN103095_c0_g1;TRINITY_DN107935_c0_g1;TRINITY_DN104972_c0_g1;TRINITY_DN107385_c0_g1;TRINITY_DN104862_c0_g1;TRINITY_DN106928_c0_g1;TRINITY_DN106810_c0_g1;TRINITY_DN105413_c0_…	map00910.png	http://www.genome.jp/dbget-bin/show_pathway?map00910/K01673%09green/K00262%09green/K00261%09green/K02575%09green/K01674%09green/K00284%09green/K15864%09green/K20935%09green/K10535%09green/K04561%09green/K10534%09green/K01915%09green/K00366%09green/K00264%09green/K01455%09green/K01725%09green
map00920	Metabolism	Energy metabolism	Sulfur metabolism	82	TRINITY_DN13910_c0_g2;TRINITY_DN16312_c0_g1;TRINITY_DN85578_c0_g1;TRINITY_DN8998_c0_g1;TRINITY_DN3745_c0_g1;TRINITY_DN27924_c0_g1;TRINITY_DN25773_c1_g1;TRINITY_DN21518_c0_g1;TRINITY_DN40165_c0_g1;TRINITY_DN80872_c2_g1;TRINITY_DN5986_c0_g1;TRINITY_DN66918_c0_g1;TRINITY_DN3553_c1_g1;TRINITY_DN8508_c0_g1;TRINITY_DN5054_c0_g1;TRINITY_DN34338_c0_g1;TRINITY_DN34272_c0_g1;TRINITY_DN23835_c0_g1;TRINITY_D…	map00920.png	http://www.genome.jp/dbget-bin/show_pathway?map00920/K05907%09green/K00392%09green/K00640%09green/K01011%09green/K17725%09green/K13811%09green/K00387%09green/K00860%09green/K13034%09green/K01082%09green/K15422%09green/K01738%09green/K01739%09green
map00061	Metabolism	Lipid metabolism	Fatty acid biosynthesis	125	TRINITY_DN44282_c0_g1;TRINITY_DN3272_c0_g1;TRINITY_DN3272_c0_g2;TRINITY_DN66231_c0_g1;TRINITY_DN57006_c0_g1;TRINITY_DN28864_c0_g1;TRINITY_DN18689_c0_g2;TRINITY_DN8939_c0_g1;TRINITY_DN82813_c0_g1;TRINITY_DN46055_c0_g1;TRINITY_DN16042_c0_g1;TRINITY_DN17653_c0_g1;TRINITY_DN43131_c0_g1;TRINITY_DN8570_c0_g1;TRINITY_DN19039_c0_g1;TRINITY_DN65684_c0_g1;TRINITY_DN24989_c0_g1;TRINITY_DN12560_c0_g1;TRINITY…	map00061.png	http://www.genome.jp/dbget-bin/show_pathway?map00061/K10781%09green/K02372%09green/K10782%09green/K00059%09green/K00645%09green/K01961%09green/K01963%09green/K01962%09green/K02160%09green/K01897%09green/K00648%09green/K11262%09green/K03921%09green/K00208%09green/K09458%09green
map00062	Metabolism	Lipid metabolism	Fatty acid elongation	53	TRINITY_DN27749_c0_g1;TRINITY_DN9588_c0_g1;TRINITY_DN62103_c0_g1;TRINITY_DN52160_c0_g1;TRINITY_DN52160_c0_g2;TRINITY_DN83258_c0_g1;TRINITY_DN20163_c0_g1;TRINITY_DN39955_c0_g1;TRINITY_DN22666_c0_g1;TRINITY_DN47434_c0_g1;TRINITY_DN26053_c1_g1;TRINITY_DN730_c0_g1;TRINITY_DN22876_c1_g1;TRINITY_DN35690_c0_g1;TRINITY_DN37265_c0_g1;TRINITY_DN15596_c0_g1;TRINITY_DN15588_c0_g1;TRINITY_DN12880_c0_g1;TRINIT…	map00062.png	http://www.genome.jp/dbget-bin/show_pathway?map00062/K01068%09green/K10703%09green/K01074%09green/K15397%09green/K10258%09green/K07512%09green/K10251%09green
map00071	Metabolism	Lipid metabolism	Fatty acid degradation	111	TRINITY_DN66231_c0_g1;TRINITY_DN64944_c0_g1;TRINITY_DN196_c0_g2;TRINITY_DN18689_c0_g2;TRINITY_DN38281_c1_g1;TRINITY_DN38281_c0_g1;TRINITY_DN2750_c0_g2;TRINITY_DN76745_c0_g1;TRINITY_DN16042_c0_g1;TRINITY_DN105619_c0_g1;TRINITY_DN106369_c0_g1;TRINITY_DN33905_c0_g1;TRINITY_DN33905_c0_g2;TRINITY_DN43131_c0_g1;TRINITY_DN34712_c0_g1;TRINITY_DN756_c1_g2;TRINITY_DN756_c0_g1;TRINITY_DN756_c0_g2;TRINITY_DN…	map00071.png	http://www.genome.jp/dbget-bin/show_pathway?map00071/K00128%09green/K00001%09green/K14085%09green/K18857%09green/K00249%09green/K15401%09green/K00232%09green/K14338%09green/K10527%09green/K00121%09green/K01897%09green/K20809%09green/K07513%09green/K00626%09green
map00072	Metabolism	Lipid metabolism	Synthesis and degradation of ketone bodies	7	TRINITY_DN9269_c0_g1;TRINITY_DN3201_c0_g1;TRINITY_DN5702_c0_g1;TRINITY_DN10990_c0_g1;TRINITY_DN62327_c0_g1;TRINITY_DN62327_c0_g2;TRINITY_DN37_c0_g1	map00072.png	http://www.genome.jp/dbget-bin/show_pathway?map00072/K01640%09green/K01641%09green/K00626%09green
map00073	Metabolism	Lipid metabolism	Cutin, suberine and wax biosynthesis	53	TRINITY_DN79476_c0_g1;TRINITY_DN67429_c0_g1;TRINITY_DN3707_c0_g1;TRINITY_DN91504_c0_g1;TRINITY_DN39810_c0_g1;TRINITY_DN39810_c0_g2;TRINITY_DN65047_c1_g2;TRINITY_DN17363_c0_g1;TRINITY_DN100501_c0_g1;TRINITY_DN53114_c0_g1;TRINITY_DN34742_c0_g1;TRINITY_DN66919_c0_g1;TRINITY_DN66919_c0_g2;TRINITY_DN15640_c0_g1;TRINITY_DN17840_c0_g1;TRINITY_DN30647_c0_g1;TRINITY_DN30647_c0_g3;TRINITY_DN90657_c0_g1;TRI…	map00073.png	http://www.genome.jp/dbget-bin/show_pathway?map00073/K17991%09green/K13356%09green/K13065%09green/K20768%09green/K20769%09green/K15404%09green/K15398%09green/K15400%09green/K15403%09green/K15402%09green/K13407%09green/K15401%09green
map00100	Metabolism	Lipid metabolism	Steroid biosynthesis	53	TRINITY_DN27835_c0_g1;TRINITY_DN3227_c0_g1;TRINITY_DN3227_c0_g2;TRINITY_DN78962_c1_g1;TRINITY_DN28938_c0_g1;TRINITY_DN8983_c0_g1;TRINITY_DN3797_c0_g1;TRINITY_DN3733_c0_g2;TRINITY_DN39808_c0_g1;TRINITY_DN28680_c0_g1;TRINITY_DN17704_c0_g1;TRINITY_DN17704_c0_g2;TRINITY_DN60167_c0_g2;TRINITY_DN65538_c0_g1;TRINITY_DN4509_c0_g1;TRINITY_DN5060_c0_g1;TRINITY_DN5060_c0_g2;TRINITY_DN5082_c1_g1;TRINITY_DN10…	map00100.png	http://www.genome.jp/dbget-bin/show_pathway?map00100/K05917%09green/K01853%09green/K07748%09green/K00801%09green/K00559%09green/K01824%09green/K08246%09green/K00227%09green/K01052%09green/K08242%09green/K00213%09green/K09832%09green/K00511%09green/K14674%09green/K14423%09green/K14424%09green/K00222%09green/K09828%09green
map00561	Metabolism	Lipid metabolism	Glycerolipid metabolism	173	TRINITY_DN16644_c0_g1;TRINITY_DN8293_c0_g1;TRINITY_DN8293_c0_g2;TRINITY_DN13909_c0_g1;TRINITY_DN75878_c0_g1;TRINITY_DN45230_c0_g1;TRINITY_DN50887_c0_g1;TRINITY_DN7999_c0_g1;TRINITY_DN67063_c0_g1;TRINITY_DN18696_c0_g1;TRINITY_DN18696_c0_g2;TRINITY_DN3794_c1_g1;TRINITY_DN46243_c0_g3;TRINITY_DN27899_c1_g1;TRINITY_DN27899_c0_g1;TRINITY_DN27899_c0_g2;TRINITY_DN13188_c0_g1;TRINITY_DN48123_c1_g1;TRINITY…	map00561.png	http://www.genome.jp/dbget-bin/show_pathway?map00561/K14674%09green/K15918%09green/K00085%09green/K03715%09green/K14085%09green/K00863%09green/K15728%09green/K14452%09green/K09480%09green/K14457%09green/K13519%09green/K00011%09green/K13513%09green/K21362%09green/K00901%09green/K11155%09green/K00630%09green/K00864%09green/K06119%09green/K06118%09green/K00679%09green/K13523%09green/K07407%09green/K…
map00564	Metabolism	Lipid metabolism	Glycerophospholipid metabolism	216	TRINITY_DN8293_c0_g1;TRINITY_DN8293_c0_g2;TRINITY_DN13909_c0_g1;TRINITY_DN9256_c0_g1;TRINITY_DN9232_c0_g1;TRINITY_DN75878_c0_g1;TRINITY_DN3290_c0_g1;TRINITY_DN45230_c0_g1;TRINITY_DN50887_c0_g1;TRINITY_DN18636_c1_g2;TRINITY_DN18636_c1_g1;TRINITY_DN18636_c0_g1;TRINITY_DN95605_c0_g1;TRINITY_DN13146_c0_g1;TRINITY_DN48123_c1_g1;TRINITY_DN48123_c0_g1;TRINITY_DN25757_c0_g2;TRINITY_DN83349_c0_g1;TRINITY_…	map00564.png	http://www.genome.jp/dbget-bin/show_pathway?map00564/K14674%09green/K00999%09green/K00995%09green/K00894%09green/K00993%09green/K01115%09green/K13519%09green/K08730%09green/K06129%09green/K15728%09green/K01047%09green/K01126%09green/K13511%09green/K13510%09green/K13513%09green/K00111%09green/K00967%09green/K01517%09green/K00968%09green/K00981%09green/K08744%09green/K01114%09green/K01613%09green/K…
map00565	Metabolism	Lipid metabolism	Ether lipid metabolism	72	TRINITY_DN45230_c0_g1;TRINITY_DN18636_c1_g2;TRINITY_DN18636_c1_g1;TRINITY_DN18636_c0_g1;TRINITY_DN95605_c0_g1;TRINITY_DN17704_c0_g1;TRINITY_DN17704_c0_g2;TRINITY_DN43881_c0_g1;TRINITY_DN54142_c0_g1;TRINITY_DN29639_c0_g1;TRINITY_DN65538_c0_g1;TRINITY_DN65897_c0_g1;TRINITY_DN10209_c0_g1;TRINITY_DN11215_c0_g1;TRINITY_DN68213_c0_g1;TRINITY_DN7795_c0_g1;TRINITY_DN7795_c0_g2;TRINITY_DN7795_c0_g3;TRINIT…	map00565.png	http://www.genome.jp/dbget-bin/show_pathway?map00565/K16860%09green/K01115%09green/K13519%09green/K01047%09green/K00993%09green/K13510%09green/K14674%09green/K01114%09green/K04628%09green
map00600	Metabolism	Lipid metabolism	Sphingolipid metabolism	76	TRINITY_DN16334_c0_g1;TRINITY_DN16334_c0_g2;TRINITY_DN7999_c0_g1;TRINITY_DN18625_c0_g1;TRINITY_DN13188_c0_g1;TRINITY_DN20142_c0_g1;TRINITY_DN1472_c1_g1;TRINITY_DN22624_c0_g1;TRINITY_DN22624_c0_g2;TRINITY_DN36474_c0_g1;TRINITY_DN65550_c0_g1;TRINITY_DN3586_c0_g1;TRINITY_DN3572_c0_g1;TRINITY_DN28467_c0_g1;TRINITY_DN28467_c0_g2;TRINITY_DN6967_c0_g2;TRINITY_DN24945_c0_g1;TRINITY_DN57196_c1_g1;TRINITY_…	map00600.png	http://www.genome.jp/dbget-bin/show_pathway?map00600/K01190%09green/K01634%09green/K00654%09green/K12309%09green/K04628%09green/K04713%09green/K04712%09green/K04711%09green/K04710%09green/K04716%09green/K04715%09green/K07407%09green/K04718%09green/K04708%09green/K17108%09green/K12349%09green
map00590	Metabolism	Lipid metabolism	Arachidonic acid metabolism	56	TRINITY_DN7955_c0_g1;TRINITY_DN3728_c0_g1;TRINITY_DN17704_c0_g1;TRINITY_DN17704_c0_g2;TRINITY_DN103617_c0_g1;TRINITY_DN106915_c0_g1;TRINITY_DN102636_c0_g2;TRINITY_DN80402_c0_g1;TRINITY_DN71277_c1_g1;TRINITY_DN29614_c0_g1;TRINITY_DN65538_c0_g1;TRINITY_DN15614_c0_g1;TRINITY_DN19081_c0_g1;TRINITY_DN15422_c0_g1;TRINITY_DN15422_c0_g2;TRINITY_DN15422_c0_g3;TRINITY_DN21158_c0_g1;TRINITY_DN70148_c0_g1;TR…	map00590.png	http://www.genome.jp/dbget-bin/show_pathway?map00590/K01047%09green/K05309%09green/K15730%09green/K01254%09green/K00079%09green/K18592%09green/K00681%09green/K20617%09green/K07418%09green/K00432%09green/K14674%09green/K00512%09green
map00591	Metabolism	Lipid metabolism	Linoleic acid metabolism	68	TRINITY_DN91744_c0_g1;TRINITY_DN50930_c0_g1;TRINITY_DN98511_c0_g1;TRINITY_DN28863_c1_g1;TRINITY_DN17704_c0_g1;TRINITY_DN17704_c0_g2;TRINITY_DN43913_c0_g1;TRINITY_DN106915_c0_g1;TRINITY_DN71277_c1_g1;TRINITY_DN29614_c0_g1;TRINITY_DN65538_c0_g1;TRINITY_DN37471_c0_g1;TRINITY_DN37383_c0_g1;TRINITY_DN70148_c0_g1;TRINITY_DN63691_c0_g1;TRINITY_DN24267_c0_g1;TRINITY_DN66638_c0_g1;TRINITY_DN14381_c0_g1;TR…	map00591.png	http://www.genome.jp/dbget-bin/show_pathway?map00591/K01047%09green/K00454%09green/K15718%09green/K20617%09green/K14674%09green/K00512%09green/K07418%09green
map00592	Metabolism	Lipid metabolism	alpha-Linolenic acid metabolism	88	TRINITY_DN64944_c0_g1;TRINITY_DN38281_c1_g1;TRINITY_DN38281_c0_g1;TRINITY_DN3727_c0_g1;TRINITY_DN3727_c0_g3;TRINITY_DN2750_c0_g2;TRINITY_DN76745_c0_g1;TRINITY_DN74038_c0_g1;TRINITY_DN22622_c0_g1;TRINITY_DN17704_c0_g1;TRINITY_DN17704_c0_g2;TRINITY_DN105619_c0_g1;TRINITY_DN33905_c0_g1;TRINITY_DN33905_c0_g2;TRINITY_DN756_c1_g2;TRINITY_DN756_c0_g1;TRINITY_DN756_c0_g2;TRINITY_DN65538_c0_g1;TRINITY_DN6…	map00592.png	http://www.genome.jp/dbget-bin/show_pathway?map00592/K10527%09green/K05894%09green/K10526%09green/K18857%09green/K00454%09green/K00232%09green/K01047%09green/K10525%09green/K01723%09green/K10528%09green/K10529%09green/K14674%09green/K07513%09green
map01040	Metabolism	Lipid metabolism	Biosynthesis of unsaturated fatty acids	61	TRINITY_DN27749_c0_g1;TRINITY_DN38281_c1_g1;TRINITY_DN38281_c0_g1;TRINITY_DN20163_c0_g1;TRINITY_DN76745_c0_g1;TRINITY_DN39955_c0_g1;TRINITY_DN17653_c0_g1;TRINITY_DN103058_c0_g1;TRINITY_DN103046_c0_g1;TRINITY_DN105619_c0_g1;TRINITY_DN756_c1_g2;TRINITY_DN756_c0_g1;TRINITY_DN756_c0_g2;TRINITY_DN730_c0_g1;TRINITY_DN65544_c0_g1;TRINITY_DN35690_c0_g1;TRINITY_DN15447_c0_g1;TRINITY_DN23834_c0_g1;TRINITY_…	map01040.png	http://www.genome.jp/dbget-bin/show_pathway?map01040/K12405%09green/K01068%09green/K10703%09green/K00232%09green/K14729%09green/K10258%09green/K10256%09green/K07513%09green/K03921%09green/K00507%09green/K10251%09green
map00230	Metabolism	Nucleotide metabolism	Purine metabolism	465	TRINITY_DN16650_c0_g1;TRINITY_DN13910_c0_g2;TRINITY_DN32852_c0_g1;TRINITY_DN9245_c0_g1;TRINITY_DN56367_c0_g1;TRINITY_DN92958_c0_g1;TRINITY_DN72047_c0_g1;TRINITY_DN72047_c0_g2;TRINITY_DN78131_c1_g1;TRINITY_DN3222_c1_g2;TRINITY_DN3298_c0_g1;TRINITY_DN50899_c0_g1;TRINITY_DN16330_c0_g1;TRINITY_DN56963_c1_g5;TRINITY_DN23308_c0_g1;TRINITY_DN23248_c0_g1;TRINITY_DN23248_c0_g2;TRINITY_DN23248_c0_g3;TRINIT…	map00230.png	http://www.genome.jp/dbget-bin/show_pathway?map00230/K02083%09green/K06966%09green/K03020%09green/K03021%09green/K03022%09green/K03023%09green/K03024%09green/K03025%09green/K03026%09green/K03027%09green/K00873%09green/K18151%09green/K18447%09green/K03787%09green/K01756%09green/K01519%09green/K01517%09green/K01513%09green/K01510%09green/K02320%09green/K02321%09green/K00759%09green/K02324%09green/K…
map00240	Metabolism	Nucleotide metabolism	Pyrimidine metabolism	395	TRINITY_DN50274_c0_g1;TRINITY_DN9245_c0_g1;TRINITY_DN92958_c0_g1;TRINITY_DN72047_c0_g1;TRINITY_DN72047_c0_g2;TRINITY_DN91712_c0_g1;TRINITY_DN3222_c1_g2;TRINITY_DN37755_c0_g1;TRINITY_DN50899_c0_g1;TRINITY_DN16372_c0_g1;TRINITY_DN16330_c0_g1;TRINITY_DN98476_c1_g1;TRINITY_DN65013_c0_g1;TRINITY_DN23086_c0_g1;TRINITY_DN108_c0_g1;TRINITY_DN7946_c0_g1;TRINITY_DN7952_c0_g1;TRINITY_DN85935_c0_g1;TRINITY_D…	map00240.png	http://www.genome.jp/dbget-bin/show_pathway?map00240/K00857%09green/K02690%09green/K03000%09green/K20636%09green/K00254%09green/K02327%09green/K06966%09green/K01240%09green/K03006%09green/K03007%09green/K01464%09green/K00761%09green/K03002%09green/K03025%09green/K03026%09green/K03027%09green/K00609%09green/K03043%09green/K02335%09green/K01937%09green/K03046%09green/K03040%09green/K03008%09green/K…
map00250	Metabolism	Amino acid metabolism	Alanine, aspartate and glutamate metabolism	148	TRINITY_DN13903_c0_g1;TRINITY_DN13927_c0_g1;TRINITY_DN99362_c0_g1;TRINITY_DN91712_c0_g1;TRINITY_DN49083_c0_g1;TRINITY_DN64846_c0_g1;TRINITY_DN128_c0_g1;TRINITY_DN3789_c0_g1;TRINITY_DN3789_c0_g2;TRINITY_DN27712_c2_g1;TRINITY_DN27712_c0_g1;TRINITY_DN22507_c0_g1;TRINITY_DN22505_c0_g1;TRINITY_DN12680_c0_g1;TRINITY_DN33188_c0_g1;TRINITY_DN13114_c0_g1;TRINITY_DN13152_c0_g1;TRINITY_DN67268_c0_g1;TRINITY…	map00250.png	http://www.genome.jp/dbget-bin/show_pathway?map00250/K00764%09green/K17761%09green/K00811%09green/K00814%09green/K01580%09green/K00830%09green/K01915%09green/K00609%09green/K00262%09green/K00261%09green/K14455%09green/K14454%09green/K00264%09green/K01956%09green/K01955%09green/K16871%09green/K01953%09green/K01755%09green/K01756%09green/K00827%09green/K14272%09green/K00820%09green/K00294%09green/K…
map00260	Metabolism	Amino acid metabolism	Glycine, serine and threonine metabolism	200	TRINITY_DN36603_c0_g1;TRINITY_DN36603_c0_g2;TRINITY_DN13927_c0_g1;TRINITY_DN50224_c0_g1;TRINITY_DN50224_c0_g2;TRINITY_DN32802_c0_g1;TRINITY_DN9294_c0_g1;TRINITY_DN3231_c1_g1;TRINITY_DN3231_c0_g1;TRINITY_DN3231_c0_g2;TRINITY_DN3231_c0_g3;TRINITY_DN16364_c0_g1;TRINITY_DN73033_c0_g1;TRINITY_DN64846_c0_g1;TRINITY_DN175_c0_g1;TRINITY_DN27706_c0_g1;TRINITY_DN13175_c0_g1;TRINITY_DN65743_c0_g1;TRINITY_DN…	map00260.png	http://www.genome.jp/dbget-bin/show_pathway?map00260/K01079%09green/K15919%09green/K15918%09green/K14085%09green/K06001%09green/K00600%09green/K00605%09green/K00830%09green/K00831%09green/K00872%09green/K00133%09green/K00130%09green/K01834%09green/K00281%09green/K02437%09green/K01754%09green/K15893%09green/K01695%09green/K01696%09green/K00827%09green/K14272%09green/K01733%09green/K00928%09green/K…
map00270	Metabolism	Amino acid metabolism	Cysteine and methionine metabolism	256	TRINITY_DN72700_c0_g1;TRINITY_DN44240_c0_g1;TRINITY_DN9265_c0_g1;TRINITY_DN92922_c0_g1;TRINITY_DN91695_c0_g1;TRINITY_DN78115_c0_g1;TRINITY_DN3231_c1_g1;TRINITY_DN3231_c0_g1;TRINITY_DN3231_c0_g2;TRINITY_DN3231_c0_g3;TRINITY_DN16312_c0_g1;TRINITY_DN64846_c0_g1;TRINITY_DN23244_c0_g2;TRINITY_DN158_c0_g1;TRINITY_DN7994_c0_g1;TRINITY_DN7994_c0_g2;TRINITY_DN8998_c0_g1;TRINITY_DN8927_c0_g1;TRINITY_DN2752…	map00270.png	http://www.genome.jp/dbget-bin/show_pathway?map00270/K00899%09green/K01244%09green/K16054%09green/K01011%09green/K01762%09green/K00811%09green/K00815%09green/K01761%09green/K01760%09green/K01919%09green/K05933%09green/K00133%09green/K14454%09green/K00640%09green/K00547%09green/K12524%09green/K00789%09green/K17398%09green/K00016%09green/K00549%09green/K08967%09green/K01251%09green/K08963%09green/K…
map00280	Metabolism	Amino acid metabolism	Valine, leucine and isoleucine degradation	90	TRINITY_DN72686_c0_g1;TRINITY_DN9269_c0_g1;TRINITY_DN78115_c0_g1;TRINITY_DN3201_c0_g1;TRINITY_DN64846_c0_g1;TRINITY_DN94829_c0_g1;TRINITY_DN196_c0_g2;TRINITY_DN33250_c0_g1;TRINITY_DN2733_c0_g2;TRINITY_DN2788_c0_g2;TRINITY_DN84477_c0_g1;TRINITY_DN105619_c0_g1;TRINITY_DN44820_c0_g1;TRINITY_DN34712_c0_g1;TRINITY_DN34722_c0_g2;TRINITY_DN15690_c0_g2;TRINITY_DN3588_c0_g1;TRINITY_DN19051_c0_g1;TRINITY_D…	map00280.png	http://www.genome.jp/dbget-bin/show_pathway?map00280/K00128%09green/K18660%09green/K01641%09green/K05607%09green/K05605%09green/K00166%09green/K00167%09green/K00140%09green/K00626%09green/K00249%09green/K00827%09green/K00826%09green/K00382%09green/K14085%09green/K01640%09green/K07513%09green/K09699%09green/K00020%09green/K01969%09green/K01968%09green
map00290	Metabolism	Amino acid metabolism	Valine, leucine and isoleucine biosynthesis	47	TRINITY_DN78115_c0_g1;TRINITY_DN84477_c0_g1;TRINITY_DN23360_c0_g1;TRINITY_DN101915_c0_g1;TRINITY_DN36562_c0_g3;TRINITY_DN65595_c0_g1;TRINITY_DN89666_c0_g1;TRINITY_DN35756_c0_g1;TRINITY_DN12562_c0_g1;TRINITY_DN7751_c0_g1;TRINITY_DN13279_c0_g2;TRINITY_DN24288_c0_g1;TRINITY_DN24288_c0_g2;TRINITY_DN15553_c0_g1;TRINITY_DN3025_c0_g1;TRINITY_DN18323_c0_g1;TRINITY_DN10191_c0_g1;TRINITY_DN52036_c0_g1;TRIN…	map00290.png	http://www.genome.jp/dbget-bin/show_pathway?map00290/K01754%09green/K01704%09green/K01687%09green/K00052%09green/K00053%09green/K01649%09green/K00826%09green/K01652%09green/K01703%09green/K01653%09green
map00300	Metabolism	Amino acid metabolism	Lysine biosynthesis	43	TRINITY_DN3231_c1_g1;TRINITY_DN3231_c0_g1;TRINITY_DN3231_c0_g2;TRINITY_DN3231_c0_g3;TRINITY_DN28886_c0_g1;TRINITY_DN7933_c0_g3;TRINITY_DN13175_c0_g1;TRINITY_DN65743_c0_g1;TRINITY_DN38399_c0_g1;TRINITY_DN65661_c1_g1;TRINITY_DN15340_c0_g1;TRINITY_DN6883_c0_g1;TRINITY_DN11917_c0_g1;TRINITY_DN32911_c0_g1;TRINITY_DN25378_c0_g1;TRINITY_DN30453_c0_g1;TRINITY_DN77106_c0_g1;TRINITY_DN95274_c0_g1;TRINITY_D…	map00300.png	http://www.genome.jp/dbget-bin/show_pathway?map00300/K10206%09green/K00215%09green/K00133%09green/K01778%09green/K01586%09green/K01714%09green/K12524%09green/K00928%09green
map00310	Metabolism	Amino acid metabolism	Lysine degradation	131	TRINITY_DN8216_c0_g1;TRINITY_DN8216_c0_g2;TRINITY_DN9513_c0_g2;TRINITY_DN72043_c0_g1;TRINITY_DN75905_c1_g1;TRINITY_DN75905_c0_g1;TRINITY_DN18650_c0_g1;TRINITY_DN18650_c0_g2;TRINITY_DN8988_c0_g1;TRINITY_DN27478_c0_g1;TRINITY_DN13130_c0_g1;TRINITY_DN46798_c0_g1;TRINITY_DN65036_c0_g1;TRINITY_DN17367_c0_g2;TRINITY_DN17367_c0_g3;TRINITY_DN74016_c0_g1;TRINITY_DN47675_c0_g1;TRINITY_DN1447_c2_g1;TRINITY_…	map00310.png	http://www.genome.jp/dbget-bin/show_pathway?map00310/K11419%09green/K11423%09green/K11446%09green/K14085%09green/K00658%09green/K18826%09green/K00164%09green/K00306%09green/K11433%09green/K00626%09green/K00128%09green/K11422%09green/K03242%09green/K11420%09green/K11430%09green/K14157%09green/K19199%09green
map00220	Metabolism	Amino acid metabolism	Arginine biosynthesis	103	TRINITY_DN72650_c0_g1;TRINITY_DN13903_c0_g1;TRINITY_DN38333_c1_g1;TRINITY_DN38333_c0_g1;TRINITY_DN27712_c2_g1;TRINITY_DN27712_c0_g1;TRINITY_DN13114_c0_g1;TRINITY_DN47651_c0_g2;TRINITY_DN34501_c0_g1;TRINITY_DN90388_c1_g1;TRINITY_DN17386_c0_g1;TRINITY_DN67161_c0_g1;TRINITY_DN103095_c0_g1;TRINITY_DN104972_c0_g1;TRINITY_DN107385_c0_g1;TRINITY_DN107359_c0_g1;TRINITY_DN5961_c0_g1;TRINITY_DN44733_c0_g1;…	map00220.png	http://www.genome.jp/dbget-bin/show_pathway?map00220/K01755%09green/K00261%09green/K14455%09green/K00262%09green/K00145%09green/K14272%09green/K01940%09green/K01476%09green/K00930%09green/K01438%09green/K00811%09green/K00611%09green/K00814%09green/K14682%09green/K01915%09green/K00818%09green/K14677%09green/K00620%09green/K01427%09green/K13427%09green/K14454%09green
map00330	Metabolism	Amino acid metabolism	Arginine and proline metabolism	127	TRINITY_DN8261_c0_g1;TRINITY_DN99362_c0_g1;TRINITY_DN27661_c0_g1;TRINITY_DN21548_c0_g2;TRINITY_DN2757_c0_g1;TRINITY_DN47559_c0_g1;TRINITY_DN65965_c2_g1;TRINITY_DN107420_c0_g1;TRINITY_DN50061_c0_g1;TRINITY_DN5936_c0_g1;TRINITY_DN26116_c0_g1;TRINITY_DN34712_c0_g1;TRINITY_DN770_c0_g1;TRINITY_DN770_c0_g2;TRINITY_DN15690_c0_g2;TRINITY_DN3527_c1_g3;TRINITY_DN8557_c1_g3;TRINITY_DN8557_c1_g2;TRINITY_DN85…	map00330.png	http://www.genome.jp/dbget-bin/show_pathway?map00330/K12259%09green/K12251%09green/K00811%09green/K01581%09green/K01583%09green/K14085%09green/K00819%09green/K00933%09green/K00318%09green/K12657%09green/K17839%09green/K14455%09green/K14454%09green/K01426%09green/K00286%09green/K13366%09green/K00472%09green/K01259%09green/K01476%09green/K01611%09green/K00294%09green/K00128%09green/K10536%09green/K…
map00340	Metabolism	Amino acid metabolism	Histidine metabolism	31	TRINITY_DN65962_c0_g1;TRINITY_DN34712_c0_g1;TRINITY_DN15690_c0_g2;TRINITY_DN19051_c0_g1;TRINITY_DN19051_c0_g3;TRINITY_DN10296_c0_g2;TRINITY_DN11219_c0_g1;TRINITY_DN11219_c0_g2;TRINITY_DN58060_c1_g1;TRINITY_DN5500_c0_g1;TRINITY_DN26164_c0_g1;TRINITY_DN79801_c0_g1;TRINITY_DN206_c0_g1;TRINITY_DN36687_c0_g2;TRINITY_DN14973_c0_g1;TRINITY_DN2859_c0_g1;TRINITY_DN33294_c0_g1;TRINITY_DN17297_c0_g2;TRINITY…	map00340.png	http://www.genome.jp/dbget-bin/show_pathway?map00340/K14085%09green/K18649%09green/K01663%09green/K11755%09green/K00817%09green/K01693%09green/K00128%09green/K01814%09green/K01590%09green/K00765%09green/K00013%09green
map00350	Metabolism	Amino acid metabolism	Tyrosine metabolism	90	TRINITY_DN8222_c0_g1;TRINITY_DN27094_c0_g1;TRINITY_DN39006_c0_g1;TRINITY_DN34540_c0_g1;TRINITY_DN107911_c0_g1;TRINITY_DN107408_c0_g1;TRINITY_DN101587_c0_g1;TRINITY_DN26101_c0_g1;TRINITY_DN9618_c0_g1;TRINITY_DN17870_c0_g1;TRINITY_DN10293_c0_g1;TRINITY_DN94719_c0_g1;TRINITY_DN37211_c0_g3;TRINITY_DN2172_c0_g1;TRINITY_DN30054_c0_g1;TRINITY_DN30096_c0_g1;TRINITY_DN18356_c0_g2;TRINITY_DN24097_c0_g1;TRI…	map00350.png	http://www.genome.jp/dbget-bin/show_pathway?map00350/K00276%09green/K14455%09green/K14454%09green/K00001%09green/K00811%09green/K01800%09green/K00503%09green/K00817%09green/K15849%09green/K18857%09green/K00451%09green/K01592%09green/K01593%09green/K01555%09green/K07253%09green/K00121%09green/K00457%09green/K00422%09green/K00815%09green
map00360	Metabolism	Amino acid metabolism	Phenylalanine metabolism	87	TRINITY_DN8222_c0_g1;TRINITY_DN567_c0_g1;TRINITY_DN47559_c0_g1;TRINITY_DN42616_c0_g1;TRINITY_DN65965_c2_g1;TRINITY_DN107911_c0_g1;TRINITY_DN107408_c0_g1;TRINITY_DN101587_c0_g1;TRINITY_DN41835_c0_g1;TRINITY_DN41835_c0_g2;TRINITY_DN50015_c1_g1;TRINITY_DN50015_c0_g1;TRINITY_DN50015_c0_g2;TRINITY_DN11736_c0_g1;TRINITY_DN49418_c0_g1;TRINITY_DN8557_c1_g3;TRINITY_DN8557_c1_g2;TRINITY_DN8557_c1_g1;TRINIT…	map00360.png	http://www.genome.jp/dbget-bin/show_pathway?map00360/K00276%09green/K14454%09green/K14455%09green/K10775%09green/K00074%09green/K00487%09green/K00457%09green/K15849%09green/K00811%09green/K01593%09green/K00817%09green/K07253%09green/K13064%09green/K00588%09green/K01426%09green/K01904%09green/K00815%09green
map00380	Metabolism	Amino acid metabolism	Tryptophan metabolism	68	TRINITY_DN8265_c1_g1;TRINITY_DN8265_c0_g1;TRINITY_DN27038_c0_g1;TRINITY_DN8988_c0_g1;TRINITY_DN47559_c0_g1;TRINITY_DN1447_c2_g1;TRINITY_DN1447_c0_g1;TRINITY_DN65965_c2_g1;TRINITY_DN17648_c0_g1;TRINITY_DN106369_c0_g1;TRINITY_DN107408_c0_g1;TRINITY_DN34712_c0_g1;TRINITY_DN15690_c0_g2;TRINITY_DN8557_c1_g3;TRINITY_DN8557_c1_g2;TRINITY_DN8557_c1_g1;TRINITY_DN19051_c0_g1;TRINITY_DN19051_c0_g3;TRINITY_D…	map00380.png	http://www.genome.jp/dbget-bin/show_pathway?map00380/K03781%09green/K00128%09green/K16903%09green/K00164%09green/K11816%09green/K14338%09green/K01593%09green/K07408%09green/K14085%09green/K20809%09green/K01426%09green/K00626%09green/K11820%09green
map00400	Metabolism	Amino acid metabolism	Phenylalanine, tyrosine and tryptophan biosynthesis	87	TRINITY_DN8289_c0_g1;TRINITY_DN44272_c0_g1;TRINITY_DN28919_c0_g1;TRINITY_DN7927_c0_g1;TRINITY_DN61018_c1_g1;TRINITY_DN47735_c0_g1;TRINITY_DN38405_c0_g1;TRINITY_DN101587_c0_g1;TRINITY_DN76986_c0_g1;TRINITY_DN23686_c0_g1;TRINITY_DN17870_c0_g1;TRINITY_DN24944_c0_g1;TRINITY_DN11233_c0_g1;TRINITY_DN11233_c0_g2;TRINITY_DN11286_c0_g1;TRINITY_DN6277_c0_g1;TRINITY_DN94719_c0_g1;TRINITY_DN30005_c0_g1;TRINI…	map00400.png	http://www.genome.jp/dbget-bin/show_pathway?map00400/K00891%09green/K06001%09green/K00811%09green/K00766%09green/K00815%09green/K01626%09green/K00817%09green/K01850%09green/K01609%09green/K14455%09green/K14454%09green/K05359%09green/K01695%09green/K01696%09green/K15849%09green/K01736%09green/K01658%09green/K01735%09green/K13832%09green/K01657%09green/K00800%09green/K01817%09green/K15227%09green
map00410	Metabolism	Metabolism of other amino acids	beta-Alanine metabolism	84	TRINITY_DN196_c0_g2;TRINITY_DN108_c0_g1;TRINITY_DN91556_c0_g1;TRINITY_DN21548_c0_g2;TRINITY_DN2757_c0_g1;TRINITY_DN5936_c0_g1;TRINITY_DN34712_c0_g1;TRINITY_DN34722_c0_g2;TRINITY_DN15690_c0_g2;TRINITY_DN3588_c0_g1;TRINITY_DN19051_c0_g1;TRINITY_DN19051_c0_g3;TRINITY_DN5065_c0_g1;TRINITY_DN5077_c0_g1;TRINITY_DN20317_c0_g1;TRINITY_DN10293_c0_g1;TRINITY_DN59741_c0_g1;TRINITY_DN37180_c0_g1;TRINITY_DN58…	map00410.png	http://www.genome.jp/dbget-bin/show_pathway?map00410/K00128%09green/K00276%09green/K17839%09green/K12259%09green/K05605%09green/K00207%09green/K00140%09green/K13366%09green/K00249%09green/K01431%09green/K01464%09green/K01578%09green/K01580%09green/K14085%09green/K00797%09green/K01918%09green
map00430	Metabolism	Metabolism of other amino acids	Taurine and hypotaurine metabolism	26	TRINITY_DN3241_c1_g1;TRINITY_DN3241_c0_g1;TRINITY_DN91556_c0_g1;TRINITY_DN15614_c0_g1;TRINITY_DN4516_c1_g2;TRINITY_DN4516_c1_g1;TRINITY_DN4516_c0_g2;TRINITY_DN4516_c0_g3;TRINITY_DN12896_c0_g1;TRINITY_DN7283_c1_g1;TRINITY_DN7283_c0_g1;TRINITY_DN10820_c0_g1;TRINITY_DN57446_c0_g1;TRINITY_DN11683_c0_g2;TRINITY_DN6628_c1_g1;TRINITY_DN6628_c0_g1;TRINITY_DN34994_c0_g2;TRINITY_DN95341_c0_g1;TRINITY_DN440…	map00430.png	http://www.genome.jp/dbget-bin/show_pathway?map00430/K10712%09green/K00681%09green/K01580%09green/K18592%09green
map00440	Metabolism	Metabolism of other amino acids	Phosphonate and phosphinate metabolism	11	TRINITY_DN95605_c0_g1;TRINITY_DN54142_c0_g1;TRINITY_DN65668_c0_g1;TRINITY_DN30783_c0_g1;TRINITY_DN7469_c0_g1;TRINITY_DN6711_c0_g1;TRINITY_DN13686_c0_g1;TRINITY_DN6117_c0_g1;TRINITY_DN25956_c0_g1;TRINITY_DN9395_c0_g1;TRINITY_DN2897_c0_g1	map00440.png	http://www.genome.jp/dbget-bin/show_pathway?map00440/K00967%09green/K00968%09green/K00993%09green
map00450	Metabolism	Metabolism of other amino acids	Selenocompound metabolism	59	TRINITY_DN13910_c0_g2;TRINITY_DN32759_c0_g1;TRINITY_DN7994_c0_g1;TRINITY_DN7994_c0_g2;TRINITY_DN21546_c0_g1;TRINITY_DN40165_c0_g1;TRINITY_DN17693_c0_g1;TRINITY_DN100858_c0_g1;TRINITY_DN5005_c0_g1;TRINITY_DN34272_c0_g1;TRINITY_DN9844_c0_g1;TRINITY_DN17465_c0_g1;TRINITY_DN46496_c0_g1;TRINITY_DN46496_c0_g2;TRINITY_DN24541_c0_g1;TRINITY_DN86076_c0_g1;TRINITY_DN18315_c0_g1;TRINITY_DN38522_c0_g1;TRINIT…	map00450.png	http://www.genome.jp/dbget-bin/show_pathway?map00450/K08247%09green/K00384%09green/K13811%09green/K01874%09green/K11717%09green/K01761%09green/K01760%09green/K00549%09green/K01739%09green
map00460	Metabolism	Metabolism of other amino acids	Cyanoamino acid metabolism	144	TRINITY_DN9294_c0_g1;TRINITY_DN16364_c0_g1;TRINITY_DN8951_c0_g1;TRINITY_DN25747_c0_g1;TRINITY_DN25773_c1_g1;TRINITY_DN38411_c0_g1;TRINITY_DN92774_c0_g1;TRINITY_DN43195_c0_g1;TRINITY_DN43195_c0_g2;TRINITY_DN5924_c0_g1;TRINITY_DN15685_c0_g1;TRINITY_DN15614_c0_g1;TRINITY_DN98402_c0_g1;TRINITY_DN20339_c0_g1;TRINITY_DN20333_c0_g1;TRINITY_DN77842_c0_g1;TRINITY_DN8028_c0_g1;TRINITY_DN38255_c0_g2;TRINITY…	map00460.png	http://www.genome.jp/dbget-bin/show_pathway?map00460/K19964%09green/K01455%09green/K12153%09green/K01188%09green/K18592%09green/K15283%09green/K00600%09green/K05350%09green/K00681%09green/K08248%09green/K05349%09green/K13035%09green/K13034%09green
map00480	Metabolism	Metabolism of other amino acids	Glutathione metabolism	218	TRINITY_DN72700_c0_g1;TRINITY_DN44240_c0_g1;TRINITY_DN44277_c0_g1;TRINITY_DN33985_c0_g2;TRINITY_DN72047_c0_g1;TRINITY_DN72047_c0_g2;TRINITY_DN23069_c0_g1;TRINITY_DN23016_c0_g1;TRINITY_DN174_c0_g1;TRINITY_DN3728_c0_g1;TRINITY_DN27660_c1_g1;TRINITY_DN27660_c0_g1;TRINITY_DN27660_c1_g4;TRINITY_DN65790_c0_g1;TRINITY_DN65790_c0_g2;TRINITY_DN37993_c0_g1;TRINITY_DN550_c0_g1;TRINITY_DN42579_c0_g1;TRINITY_…	map00480.png	http://www.genome.jp/dbget-bin/show_pathway?map00480/K21456%09green/K01469%09green/K00799%09green/K01255%09green/K00681%09green/K01256%09green/K18592%09green/K11140%09green/K00036%09green/K00797%09green/K01581%09green/K10808%09green/K00383%09green/K00432%09green/K10807%09green/K01919%09green/K00033%09green/K00434%09green/K00031%09green
map00510	Metabolism	Glycan biosynthesis and metabolism	N-Glycan biosynthesis	106	TRINITY_DN72601_c0_g1;TRINITY_DN8252_c0_g1;TRINITY_DN8252_c0_g2;TRINITY_DN36614_c0_g1;TRINITY_DN9274_c0_g1;TRINITY_DN99852_c0_g1;TRINITY_DN28897_c0_g1;TRINITY_DN21608_c0_g1;TRINITY_DN72464_c0_g1;TRINITY_DN39806_c0_g1;TRINITY_DN17355_c0_g4;TRINITY_DN17355_c0_g1;TRINITY_DN59116_c0_g1;TRINITY_DN1422_c0_g1;TRINITY_DN1422_c0_g2;TRINITY_DN104505_c0_g1;TRINITY_DN106378_c0_g1;TRINITY_DN5921_c0_g1;TRINITY…	map00510.png	http://www.genome.jp/dbget-bin/show_pathway?map00510/K14484%09green/K12670%09green/K11000%09green/K07252%09green/K03842%09green/K03843%09green/K07441%09green/K03846%09green/K03847%09green/K03844%09green/K03845%09green/K00726%09green/K03848%09green/K03849%09green/K15053%09green/K00721%09green/K07151%09green/K05546%09green/K01231%09green/K01230%09green/K01001%09green/K12666%09green/K12667%09green/K…
map00515	Metabolism	Glycan biosynthesis and metabolism	Mannose type O-glycan biosynthesis	1	TRINITY_DN64757_c0_g1	map00515.png	http://www.genome.jp/dbget-bin/show_pathway?map00515/K18207%09green
map00514	Metabolism	Glycan biosynthesis and metabolism	Other types of O-glycan biosynthesis	48	TRINITY_DN65737_c0_g1;TRINITY_DN23173_c1_g1;TRINITY_DN23173_c0_g1;TRINITY_DN54613_c0_g1;TRINITY_DN108026_c0_g1;TRINITY_DN105107_c0_g1;TRINITY_DN43213_c0_g1;TRINITY_DN71229_c0_g1;TRINITY_DN91173_c0_g2;TRINITY_DN52754_c0_g1;TRINITY_DN29027_c0_g1;TRINITY_DN84997_c0_g1;TRINITY_DN2194_c0_g1;TRINITY_DN32382_c0_g1;TRINITY_DN43681_c0_g1;TRINITY_DN12887_c0_g1;TRINITY_DN11997_c0_g1;TRINITY_DN23576_c0_g1;TR…	map00514.png	http://www.genome.jp/dbget-bin/show_pathway?map00514/K20782%09green/K20783%09green/K20781%09green/K20784%09green/K03691%09green/K18134%09green/K13667%09green/K09667%09green
map00531	Metabolism	Glycan biosynthesis and metabolism	Glycosaminoglycan degradation	43	TRINITY_DN9269_c0_g3;TRINITY_DN3263_c0_g1;TRINITY_DN27932_c0_g1;TRINITY_DN27932_c0_g2;TRINITY_DN43203_c0_g1;TRINITY_DN43203_c0_g2;TRINITY_DN28502_c0_g2;TRINITY_DN98351_c0_g1;TRINITY_DN4512_c0_g1;TRINITY_DN71937_c0_g1;TRINITY_DN15287_c1_g2;TRINITY_DN15287_c0_g1;TRINITY_DN15586_c1_g1;TRINITY_DN15586_c0_g1;TRINITY_DN24582_c0_g1;TRINITY_DN32376_c0_g1;TRINITY_DN12372_c0_g1;TRINITY_DN30939_c0_g1;TRINIT…	map00531.png	http://www.genome.jp/dbget-bin/show_pathway?map00531/K07964%09green/K12373%09green/K10532%09green/K12309%09green/K01205%09green/K09872%09green
map00563	Metabolism	Glycan biosynthesis and metabolism	Glycosylphosphatidylinositol (GPI)-anchor biosynthesis	103	TRINITY_DN44273_c1_g1;TRINITY_DN9251_c0_g1;TRINITY_DN9245_c0_g3;TRINITY_DN33637_c0_g1;TRINITY_DN16325_c0_g1;TRINITY_DN56989_c0_g2;TRINITY_DN94839_c0_g1;TRINITY_DN12627_c3_g1;TRINITY_DN65757_c0_g1;TRINITY_DN21515_c0_g1;TRINITY_DN39844_c0_g1;TRINITY_DN38748_c0_g1;TRINITY_DN40128_c1_g1;TRINITY_DN39920_c0_g1;TRINITY_DN22678_c0_g1;TRINITY_DN22208_c0_g1;TRINITY_DN36524_c0_g2;TRINITY_DN9629_c0_g1;TRINIT…	map00563.png	http://www.genome.jp/dbget-bin/show_pathway?map00563/K18723%09green/K11000%09green/K15053%09green/K07542%09green/K07541%09green/K03860%09green/K03861%09green/K05294%09green/K05291%09green/K05290%09green/K05293%09green/K03434%09green/K05310%09green/K05289%09green/K03231%09green/K09658%09green/K05292%09green/K03857%09green/K03859%09green/K03858%09green/K12831%09green/K05288%09green/K13462%09green/K…
map00601	Metabolism	Glycan biosynthesis and metabolism	Glycosphingolipid biosynthesis - lacto and neolacto series	1	TRINITY_DN16173_c0_g1	map00601.png	http://www.genome.jp/dbget-bin/show_pathway?map00601/K01988%09green
map00603	Metabolism	Glycan biosynthesis and metabolism	Glycosphingolipid biosynthesis - globo and isoglobo series	12	TRINITY_DN7999_c0_g1;TRINITY_DN13188_c0_g1;TRINITY_DN98351_c0_g1;TRINITY_DN32376_c0_g1;TRINITY_DN30939_c0_g1;TRINITY_DN47862_c0_g1;TRINITY_DN16173_c0_g1;TRINITY_DN46704_c0_g1;TRINITY_DN55185_c0_g2;TRINITY_DN3398_c0_g1;TRINITY_DN10626_c0_g1;TRINITY_DN28376_c0_g1	map00603.png	http://www.genome.jp/dbget-bin/show_pathway?map00603/K07407%09green/K12373%09green/K01988%09green
map00604	Metabolism	Glycan biosynthesis and metabolism	Glycosphingolipid biosynthesis - ganglio series	8	TRINITY_DN98351_c0_g1;TRINITY_DN32376_c0_g1;TRINITY_DN30939_c0_g1;TRINITY_DN47862_c0_g1;TRINITY_DN3398_c0_g1;TRINITY_DN10626_c0_g1;TRINITY_DN10799_c0_g1;TRINITY_DN28376_c0_g1	map00604.png	http://www.genome.jp/dbget-bin/show_pathway?map00604/K12309%09green/K12373%09green
map00511	Metabolism	Glycan biosynthesis and metabolism	Other glycan degradation	60	TRINITY_DN81533_c0_g1;TRINITY_DN12672_c0_g1;TRINITY_DN77369_c0_g1;TRINITY_DN60983_c0_g2;TRINITY_DN74098_c0_g1;TRINITY_DN1457_c0_g1;TRINITY_DN1457_c0_g2;TRINITY_DN11724_c0_g4;TRINITY_DN790_c0_g1;TRINITY_DN3572_c0_g1;TRINITY_DN98351_c0_g1;TRINITY_DN37558_c1_g1;TRINITY_DN37558_c0_g1;TRINITY_DN37558_c0_g3;TRINITY_DN61249_c0_g1;TRINITY_DN89835_c0_g1;TRINITY_DN6835_c1_g1;TRINITY_DN6835_c0_g1;TRINITY_DN…	map00511.png	http://www.genome.jp/dbget-bin/show_pathway?map00511/K01190%09green/K01191%09green/K15923%09green/K17108%09green/K12373%09green/K12309%09green/K01206%09green/K14289%09green/K01227%09green/K01444%09green
map00730	Metabolism	Metabolism of cofactors and vitamins	Thiamine metabolism	49	TRINITY_DN3214_c0_g2;TRINITY_DN16381_c0_g1;TRINITY_DN64847_c1_g1;TRINITY_DN64847_c0_g1;TRINITY_DN3796_c0_g1;TRINITY_DN89661_c0_g1;TRINITY_DN92080_c0_g1;TRINITY_DN44744_c0_g1;TRINITY_DN17903_c0_g1;TRINITY_DN5053_c0_g1;TRINITY_DN77544_c0_g1;TRINITY_DN23825_c0_g1;TRINITY_DN23852_c0_g1;TRINITY_DN84983_c0_g1;TRINITY_DN58114_c1_g1;TRINITY_DN58114_c2_g1;TRINITY_DN69970_c0_g1;TRINITY_DN69970_c0_g2;TRINIT…	map00730.png	http://www.genome.jp/dbget-bin/show_pathway?map00730/K20896%09green/K04487%09green/K03147%09green/K03146%09green/K01662%09green/K06928%09green/K14153%09green/K00878%09green/K00949%09green/K00939%09green/K06949%09green
map00740	Metabolism	Metabolism of cofactors and vitamins	Riboflavin metabolism	31	TRINITY_DN25760_c0_g1;TRINITY_DN47719_c0_g1;TRINITY_DN36536_c0_g2;TRINITY_DN33923_c0_g1;TRINITY_DN33850_c0_g1;TRINITY_DN11735_c0_g1;TRINITY_DN49426_c0_g1;TRINITY_DN9696_c0_g1;TRINITY_DN45853_c0_g1;TRINITY_DN27631_c0_g1;TRINITY_DN13301_c0_g1;TRINITY_DN5513_c0_g1;TRINITY_DN59908_c0_g1;TRINITY_DN19528_c0_g1;TRINITY_DN41149_c0_g1;TRINITY_DN16272_c0_g1;TRINITY_DN48856_c0_g2;TRINITY_DN94997_c0_g1;TRINI…	map00740.png	http://www.genome.jp/dbget-bin/show_pathway?map00740/K14379%09green/K14652%09green/K18677%09green/K20884%09green/K20860%09green/K01513%09green/K11752%09green/K18453%09green/K00794%09green/K00793%09green/K00953%09green
map00750	Metabolism	Metabolism of cofactors and vitamins	Vitamin B6 metabolism	51	TRINITY_DN3205_c0_g1;TRINITY_DN56997_c1_g1;TRINITY_DN23218_c0_g1;TRINITY_DN2742_c0_g1;TRINITY_DN61696_c0_g1;TRINITY_DN16024_c0_g1;TRINITY_DN16024_c0_g2;TRINITY_DN92044_c0_g2;TRINITY_DN67176_c0_g1;TRINITY_DN26051_c0_g1;TRINITY_DN752_c1_g1;TRINITY_DN752_c0_g1;TRINITY_DN752_c0_g2;TRINITY_DN5032_c0_g1;TRINITY_DN11267_c0_g1;TRINITY_DN11267_c0_g2;TRINITY_DN13218_c1_g1;TRINITY_DN13218_c0_g1;TRINITY_DN26…	map00750.png	http://www.genome.jp/dbget-bin/show_pathway?map00750/K08681%09green/K00275%09green/K17759%09green/K06215%09green/K13248%09green/K00868%09green/K01733%09green/K05275%09green/K00831%09green
map00760	Metabolism	Metabolism of cofactors and vitamins	Nicotinate and nicotinamide metabolism	52	TRINITY_DN98476_c1_g1;TRINITY_DN65013_c0_g1;TRINITY_DN22416_c0_g1;TRINITY_DN67268_c0_g1;TRINITY_DN79664_c0_g1;TRINITY_DN11735_c0_g1;TRINITY_DN8542_c1_g1;TRINITY_DN27631_c0_g1;TRINITY_DN8069_c0_g1;TRINITY_DN37240_c0_g1;TRINITY_DN60333_c0_g1;TRINITY_DN4334_c0_g1;TRINITY_DN4334_c0_g2;TRINITY_DN42705_c0_g1;TRINITY_DN6814_c0_g1;TRINITY_DN74578_c0_g1;TRINITY_DN4269_c0_g1;TRINITY_DN4269_c0_g2;TRINITY_DN…	map00760.png	http://www.genome.jp/dbget-bin/show_pathway?map00760/K18551%09green/K06210%09green/K03787%09green/K18677%09green/K00858%09green/K00278%09green/K01513%09green/K01950%09green/K00763%09green/K01240%09green/K01081%09green/K03426%09green/K03517%09green/K00767%09green
map00770	Metabolism	Metabolism of cofactors and vitamins	Pantothenate and CoA biosynthesis	70	TRINITY_DN56269_c0_g1;TRINITY_DN91757_c0_g2;TRINITY_DN78115_c0_g1;TRINITY_DN108_c0_g1;TRINITY_DN84477_c0_g1;TRINITY_DN1434_c0_g1;TRINITY_DN101915_c0_g1;TRINITY_DN63130_c0_g1;TRINITY_DN11735_c0_g1;TRINITY_DN5077_c0_g1;TRINITY_DN21204_c0_g1;TRINITY_DN27631_c0_g1;TRINITY_DN12562_c0_g1;TRINITY_DN38204_c0_g1;TRINITY_DN7751_c0_g1;TRINITY_DN13231_c0_g2;TRINITY_DN15553_c0_g1;TRINITY_DN3025_c0_g1;TRINITY_…	map00770.png	http://www.genome.jp/dbget-bin/show_pathway?map00770/K18677%09green/K01687%09green/K00207%09green/K01513%09green/K06133%09green/K00859%09green/K01464%09green/K00826%09green/K01598%09green/K09680%09green/K00606%09green/K01431%09green/K01922%09green/K01918%09green/K01652%09green/K01653%09green/K02201%09green/K00053%09green
map00780	Metabolism	Metabolism of cofactors and vitamins	Biotin metabolism	38	TRINITY_DN57006_c0_g1;TRINITY_DN8939_c0_g1;TRINITY_DN3750_c0_g1;TRINITY_DN8570_c0_g1;TRINITY_DN20264_c0_g1;TRINITY_DN7770_c0_g1;TRINITY_DN44412_c0_g1;TRINITY_DN2215_c1_g1;TRINITY_DN2215_c0_g1;TRINITY_DN87538_c0_g1;TRINITY_DN1888_c0_g1;TRINITY_DN1888_c0_g2;TRINITY_DN69207_c1_g1;TRINITY_DN69207_c0_g1;TRINITY_DN53755_c0_g1;TRINITY_DN7498_c0_g1;TRINITY_DN13880_c0_g1;TRINITY_DN13880_c0_g2;TRINITY_DN58…	map00780.png	http://www.genome.jp/dbget-bin/show_pathway?map00780/K19562%09green/K02372%09green/K00059%09green/K00652%09green/K01012%09green/K01942%09green/K00208%09green/K09458%09green
map00785	Metabolism	Metabolism of cofactors and vitamins	Lipoic acid metabolism	8	TRINITY_DN32749_c0_g1;TRINITY_DN70450_c0_g1;TRINITY_DN94590_c0_g1;TRINITY_DN5798_c0_g1;TRINITY_DN4770_c0_g2;TRINITY_DN5372_c1_g1;TRINITY_DN5372_c0_g1;TRINITY_DN33744_c0_g3	map00785.png	http://www.genome.jp/dbget-bin/show_pathway?map00785/K03644%09green/K03801%09green
map00790	Metabolism	Metabolism of cofactors and vitamins	Folate biosynthesis	61	TRINITY_DN33977_c0_g1;TRINITY_DN28845_c0_g1;TRINITY_DN47719_c0_g1;TRINITY_DN101708_c0_g1;TRINITY_DN33850_c0_g1;TRINITY_DN26045_c0_g1;TRINITY_DN91166_c0_g1;TRINITY_DN15422_c0_g1;TRINITY_DN15422_c0_g2;TRINITY_DN15422_c0_g3;TRINITY_DN70118_c0_g1;TRINITY_DN53031_c0_g1;TRINITY_DN24292_c0_g1;TRINITY_DN15330_c2_g1;TRINITY_DN41484_c0_g2;TRINITY_DN18327_c0_g2;TRINITY_DN38523_c0_g1;TRINITY_DN11953_c0_g1;TR…	map00790.png	http://www.genome.jp/dbget-bin/show_pathway?map00790/K18482%09green/K15376%09green/K03637%09green/K01113%09green/K14652%09green/K03635%09green/K01307%09green/K00085%09green/K00079%09green/K15631%09green/K01724%09green/K01633%09green/K00011%09green/K13950%09green/K20457%09green/K13941%09green/K01930%09green/K01495%09green/K13998%09green
map00670	Metabolism	Metabolism of cofactors and vitamins	One carbon pool by folate	64	TRINITY_DN50224_c0_g1;TRINITY_DN50224_c0_g2;TRINITY_DN9294_c0_g1;TRINITY_DN78131_c1_g1;TRINITY_DN3250_c0_g1;TRINITY_DN16364_c0_g1;TRINITY_DN175_c0_g1;TRINITY_DN7961_c0_g1;TRINITY_DN2723_c0_g1;TRINITY_DN64127_c0_g1;TRINITY_DN77253_c0_g1;TRINITY_DN100888_c0_g1;TRINITY_DN65621_c0_g1;TRINITY_DN15685_c0_g1;TRINITY_DN3512_c1_g1;TRINITY_DN3512_c0_g1;TRINITY_DN77842_c0_g1;TRINITY_DN38255_c0_g2;TRINITY_DN…	map00670.png	http://www.genome.jp/dbget-bin/show_pathway?map00670/K13998%09green/K00297%09green/K00601%09green/K00600%09green/K00602%09green/K00605%09green/K00604%09green/K01934%09green/K01938%09green/K01433%09green
map00860	Metabolism	Metabolism of cofactors and vitamins	Porphyrin and chlorophyll metabolism	102	TRINITY_DN51440_c0_g1;TRINITY_DN62093_c0_g1;TRINITY_DN33206_c0_g1;TRINITY_DN64154_c0_g1;TRINITY_DN23330_c0_g1;TRINITY_DN54137_c0_g1;TRINITY_DN9633_c0_g1;TRINITY_DN759_c0_g1;TRINITY_DN37399_c0_g1;TRINITY_DN4517_c0_g1;TRINITY_DN4517_c0_g2;TRINITY_DN4553_c0_g1;TRINITY_DN37305_c0_g1;TRINITY_DN17488_c0_g1;TRINITY_DN30692_c0_g1;TRINITY_DN54098_c0_g1;TRINITY_DN30078_c0_g1;TRINITY_DN3078_c0_g1;TRINITY_DN…	map00860.png	http://www.genome.jp/dbget-bin/show_pathway?map00860/K02257%09green/K01749%09green/K02259%09green/K19073%09green/K02492%09green/K04040%09green/K18010%09green/K19054%09green/K00228%09green/K03403%09green/K21480%09green/K01698%09green/K08099%09green/K13600%09green/K13606%09green/K01772%09green/K01719%09green/K01599%09green/K10960%09green/K13071%09green/K04035%09green/K00231%09green/K01845%09green/K…
map00130	Metabolism	Metabolism of cofactors and vitamins	Ubiquinone and other terpenoid-quinone biosynthesis	75	TRINITY_DN32779_c0_g1;TRINITY_DN16398_c0_g1;TRINITY_DN23095_c0_g1;TRINITY_DN8960_c0_g2;TRINITY_DN27897_c0_g4;TRINITY_DN27897_c0_g1;TRINITY_DN27897_c0_g2;TRINITY_DN13108_c0_g1;TRINITY_DN13126_c0_g1;TRINITY_DN13126_c0_g2;TRINITY_DN529_c0_g1;TRINITY_DN529_c0_g2;TRINITY_DN567_c0_g1;TRINITY_DN34526_c0_g1;TRINITY_DN17324_c0_g1;TRINITY_DN23341_c0_g2;TRINITY_DN23341_c0_g3;TRINITY_DN53145_c0_g1;TRINITY_DN…	map00130.png	http://www.genome.jp/dbget-bin/show_pathway?map00130/K14760%09green/K01661%09green/K09834%09green/K06126%09green/K06127%09green/K00457%09green/K12501%09green/K02548%09green/K12502%09green/K00591%09green/K02552%09green/K14759%09green/K03183%09green/K00815%09green/K09833%09green/K03809%09green/K05928%09green/K00487%09green/K06125%09green/K01904%09green
map00900	Metabolism	Metabolism of terpenoids and polyketides	Terpenoid backbone biosynthesis	196	TRINITY_DN33979_c0_g1;TRINITY_DN99301_c1_g1;TRINITY_DN64847_c1_g1;TRINITY_DN64847_c0_g1;TRINITY_DN28630_c0_g1;TRINITY_DN23103_c1_g2;TRINITY_DN23103_c1_g1;TRINITY_DN186_c1_g1;TRINITY_DN186_c0_g1;TRINITY_DN186_c0_g2;TRINITY_DN47265_c1_g1;TRINITY_DN47265_c0_g1;TRINITY_DN47265_c0_g2;TRINITY_DN12640_c0_g1;TRINITY_DN27896_c0_g1;TRINITY_DN27896_c0_g2;TRINITY_DN91544_c1_g1;TRINITY_DN91544_c0_g1;TRINITY_D…	map00900.png	http://www.genome.jp/dbget-bin/show_pathway?map00900/K01662%09green/K00991%09green/K19968%09green/K00587%09green/K00938%09green/K01641%09green/K00919%09green/K00626%09green/K05954%09green/K15889%09green/K15888%09green/K08658%09green/K05955%09green/K05356%09green/K14066%09green/K00787%09green/K11778%09green/K12742%09green/K00099%09green/K12503%09green/K00869%09green/K06013%09green/K15891%09green/K…
map00902	Metabolism	Metabolism of terpenoids and polyketides	Monoterpenoid biosynthesis	46	TRINITY_DN27800_c0_g1;TRINITY_DN27800_c0_g2;TRINITY_DN36622_c1_g1;TRINITY_DN109_c0_g1;TRINITY_DN109_c0_g2;TRINITY_DN109_c0_g3;TRINITY_DN39035_c0_g1;TRINITY_DN52167_c0_g1;TRINITY_DN39986_c0_g1;TRINITY_DN23382_c0_g1;TRINITY_DN23379_c1_g1;TRINITY_DN28708_c0_g1;TRINITY_DN28708_c0_g2;TRINITY_DN720_c7_g1;TRINITY_DN3525_c0_g1;TRINITY_DN4561_c2_g1;TRINITY_DN4561_c0_g1;TRINITY_DN9897_c0_g1;TRINITY_DN9836_…	map00902.png	http://www.genome.jp/dbget-bin/show_pathway?map00902/K12742%09green/K09285%09green/K21374%09green/K21373%09green/K07385%09green/K15095%09green
map00909	Metabolism	Metabolism of terpenoids and polyketides	Sesquiterpenoid and triterpenoid biosynthesis	43	TRINITY_DN93914_c0_g1;TRINITY_DN78962_c1_g1;TRINITY_DN3733_c0_g2;TRINITY_DN96792_c0_g2;TRINITY_DN89639_c0_g1;TRINITY_DN43853_c0_g1;TRINITY_DN43853_c0_g2;TRINITY_DN101419_c0_g1;TRINITY_DN6928_c3_g1;TRINITY_DN7734_c0_g1;TRINITY_DN54059_c0_g1;TRINITY_DN60786_c0_g1;TRINITY_DN98830_c0_g1;TRINITY_DN49628_c0_g2;TRINITY_DN308_c1_g1;TRINITY_DN16166_c0_g1;TRINITY_DN51291_c0_g1;TRINITY_DN77051_c0_g1;TRINITY…	map00909.png	http://www.genome.jp/dbget-bin/show_pathway?map00909/K15891%09green/K20658%09green/K15813%09green/K15803%09green/K15814%09green/K20659%09green/K00511%09green/K14794%09green/K00801%09green
map00904	Metabolism	Metabolism of terpenoids and polyketides	Diterpenoid biosynthesis	45	TRINITY_DN27927_c0_g1;TRINITY_DN94496_c0_g1;TRINITY_DN578_c0_g1;TRINITY_DN54525_c0_g1;TRINITY_DN63971_c0_g1;TRINITY_DN17459_c0_g1;TRINITY_DN43388_c0_g2;TRINITY_DN61533_c0_g1;TRINITY_DN16933_c0_g1;TRINITY_DN32119_c0_g2;TRINITY_DN26903_c0_g1;TRINITY_DN26903_c0_g2;TRINITY_DN26903_c0_g3;TRINITY_DN97926_c0_g4;TRINITY_DN97926_c0_g2;TRINITY_DN97926_c0_g3;TRINITY_DN1786_c0_g1;TRINITY_DN1786_c0_g2;TRINITY…	map00904.png	http://www.genome.jp/dbget-bin/show_pathway?map00904/K17982%09green/K17961%09green/K04124%09green/K04125%09green/K04120%09green/K04121%09green/K04122%09green/K04123%09green/K05282%09green
map00906	Metabolism	Metabolism of terpenoids and polyketides	Carotenoid biosynthesis	72	TRINITY_DN9293_c0_g1;TRINITY_DN34002_c0_g1;TRINITY_DN23110_c0_g1;TRINITY_DN8942_c2_g1;TRINITY_DN8942_c0_g1;TRINITY_DN3775_c0_g1;TRINITY_DN22499_c0_g1;TRINITY_DN47671_c0_g1;TRINITY_DN65937_c0_g2;TRINITY_DN5998_c0_g1;TRINITY_DN34734_c0_g2;TRINITY_DN24969_c0_g1;TRINITY_DN24922_c0_g1;TRINITY_DN68164_c0_g1;TRINITY_DN53986_c0_g1;TRINITY_DN53986_c0_g2;TRINITY_DN12577_c0_g1;TRINITY_DN17418_c0_g1;TRINITY_…	map00906.png	http://www.genome.jp/dbget-bin/show_pathway?map00906/K14593%09green/K15746%09green/K09841%09green/K09842%09green/K09843%09green/K17911%09green/K02291%09green/K17913%09green/K02293%09green/K06444%09green/K15747%09green/K09838%09green/K09835%09green/K09837%09green/K15744%09green/K07874%09green/K09840%09green/K06443%09green/K09839%09green/K00514%09green/K14595%09green
map00905	Metabolism	Metabolism of terpenoids and polyketides	Brassinosteroid biosynthesis	25	TRINITY_DN23031_c0_g1;TRINITY_DN2790_c0_g1;TRINITY_DN61042_c0_g1;TRINITY_DN53000_c0_g1;TRINITY_DN53000_c0_g2;TRINITY_DN15312_c0_g1;TRINITY_DN2192_c0_g1;TRINITY_DN1892_c0_g1;TRINITY_DN16929_c0_g1;TRINITY_DN44582_c0_g1;TRINITY_DN86343_c0_g1;TRINITY_DN87222_c0_g1;TRINITY_DN51532_c0_g1;TRINITY_DN32959_c0_g1;TRINITY_DN55999_c0_g1;TRINITY_DN30289_c0_g1;TRINITY_DN88483_c0_g1;TRINITY_DN55896_c0_g1;TRINIT…	map00905.png	http://www.genome.jp/dbget-bin/show_pathway?map00905/K20623%09green/K12638%09green/K09588%09green/K15639%09green/K12637%09green/K09587%09green/K09590%09green/K09591%09green
map00908	Metabolism	Metabolism of terpenoids and polyketides	Zeatin biosynthesis	27	TRINITY_DN3221_c0_g1;TRINITY_DN13163_c0_g1;TRINITY_DN83277_c0_g1;TRINITY_DN38768_c0_g1;TRINITY_DN101376_c0_g1;TRINITY_DN71972_c0_g1;TRINITY_DN71972_c0_g2;TRINITY_DN71972_c0_g3;TRINITY_DN38275_c0_g1;TRINITY_DN44423_c0_g1;TRINITY_DN15273_c0_g1;TRINITY_DN6857_c0_g3;TRINITY_DN16939_c0_g1;TRINITY_DN9958_c0_g1;TRINITY_DN27216_c0_g1;TRINITY_DN4629_c0_g1;TRINITY_DN37930_c0_g1;TRINITY_DN21986_c0_g1;TRINIT…	map00908.png	http://www.genome.jp/dbget-bin/show_pathway?map00908/K00279%09green/K10717%09green/K00791%09green/K13495%09green/K10760%09green/K13492%09green
map00903	Metabolism	Metabolism of terpenoids and polyketides	Limonene and pinene degradation	16	TRINITY_DN34712_c0_g1;TRINITY_DN15690_c0_g2;TRINITY_DN19051_c0_g1;TRINITY_DN19051_c0_g3;TRINITY_DN58060_c1_g1;TRINITY_DN5500_c0_g1;TRINITY_DN206_c0_g1;TRINITY_DN36687_c0_g2;TRINITY_DN35211_c0_g1;TRINITY_DN76613_c0_g1;TRINITY_DN18791_c0_g1;TRINITY_DN18791_c0_g2;TRINITY_DN24484_c0_g1;TRINITY_DN19116_c0_g1;TRINITY_DN42324_c0_g1;TRINITY_DN42324_c0_g2	map00903.png	http://www.genome.jp/dbget-bin/show_pathway?map00903/K00128%09green
map00940	Metabolism	Biosynthesis of other secondary metabolites	Phenylpropanoid biosynthesis	322	TRINITY_DN72692_c0_g1;TRINITY_DN36585_c0_g1;TRINITY_DN36619_c1_g1;TRINITY_DN36619_c0_g1;TRINITY_DN44305_c0_g1;TRINITY_DN44305_c0_g2;TRINITY_DN32855_c0_g1;TRINITY_DN32855_c0_g2;TRINITY_DN64642_c0_g1;TRINITY_DN45171_c0_g1;TRINITY_DN8951_c0_g1;TRINITY_DN3771_c0_g1;TRINITY_DN3771_c0_g2;TRINITY_DN47264_c0_g1;TRINITY_DN46272_c0_g1;TRINITY_DN22468_c0_g1;TRINITY_DN12646_c0_g1;TRINITY_DN13142_c0_g1;TRINIT…	map00940.png	http://www.genome.jp/dbget-bin/show_pathway?map00940/K19964%09green/K00083%09green/K12355%09green/K12356%09green/K09754%09green/K00588%09green/K18368%09green/K00487%09green/K06892%09green/K13065%09green/K13064%09green/K13066%09green/K01188%09green/K05350%09green/K05279%09green/K10775%09green/K01904%09green/K15283%09green/K09755%09green/K09756%09green/K00430%09green/K09753%09green/K18328%09green/K…
map00945	Metabolism	Biosynthesis of other secondary metabolites	Stilbenoid, diarylheptanoid and gingerol biosynthesis	68	TRINITY_DN36619_c1_g1;TRINITY_DN36619_c0_g1;TRINITY_DN91504_c0_g1;TRINITY_DN567_c0_g1;TRINITY_DN72481_c0_g1;TRINITY_DN64732_c0_g1;TRINITY_DN11736_c0_g1;TRINITY_DN41943_c1_g1;TRINITY_DN49779_c1_g1;TRINITY_DN17840_c0_g1;TRINITY_DN11265_c1_g1;TRINITY_DN11265_c0_g1;TRINITY_DN11265_c0_g2;TRINITY_DN100333_c0_g1;TRINITY_DN100333_c0_g2;TRINITY_DN86889_c0_g1;TRINITY_DN53477_c0_g1;TRINITY_DN20862_c0_g1;TRI…	map00945.png	http://www.genome.jp/dbget-bin/show_pathway?map00945/K16040%09green/K13065%09green/K15400%09green/K09754%09green/K00588%09green/K00487%09green
map00941	Metabolism	Biosynthesis of other secondary metabolites	Flavonoid biosynthesis	81	TRINITY_DN36619_c1_g1;TRINITY_DN36619_c0_g1;TRINITY_DN8917_c0_g1;TRINITY_DN91504_c0_g1;TRINITY_DN567_c0_g1;TRINITY_DN72481_c0_g1;TRINITY_DN64732_c0_g1;TRINITY_DN41906_c0_g1;TRINITY_DN11736_c0_g1;TRINITY_DN29598_c0_g1;TRINITY_DN17840_c0_g1;TRINITY_DN20388_c0_g1;TRINITY_DN11265_c1_g1;TRINITY_DN11265_c0_g1;TRINITY_DN11265_c0_g2;TRINITY_DN20248_c0_g1;TRINITY_DN29758_c0_g1;TRINITY_DN86889_c0_g1;TRINIT…	map00941.png	http://www.genome.jp/dbget-bin/show_pathway?map00941/K13065%09green/K08695%09green/K13083%09green/K13082%09green/K13081%09green/K01859%09green/K00475%09green/K05277%09green/K15400%09green/K00660%09green/K09754%09green/K00588%09green/K05278%09green/K00487%09green/K05280%09green
map00944	Metabolism	Biosynthesis of other secondary metabolites	Flavone and flavonol biosynthesis	8	TRINITY_DN16688_c0_g1;TRINITY_DN13142_c0_g1;TRINITY_DN4454_c0_g1;TRINITY_DN2165_c0_g1;TRINITY_DN7271_c0_g1;TRINITY_DN4648_c0_g1;TRINITY_DN4648_c0_g2;TRINITY_DN40220_c0_g1	map00944.png	http://www.genome.jp/dbget-bin/show_pathway?map00944/K05279%09green/K13066%09green/K13083%09green/K05280%09green/K13264%09green
map00943	Metabolism	Biosynthesis of other secondary metabolites	Isoflavonoid biosynthesis	10	TRINITY_DN16688_c0_g1;TRINITY_DN1413_c0_g1;TRINITY_DN7271_c0_g1;TRINITY_DN14293_c0_g1;TRINITY_DN42151_c0_g2;TRINITY_DN40220_c0_g1;TRINITY_DN20802_c0_g1;TRINITY_DN18913_c1_g2;TRINITY_DN18913_c1_g1;TRINITY_DN18913_c0_g1	map00943.png	http://www.genome.jp/dbget-bin/show_pathway?map00943/K13262%09green/K13258%09green/K13259%09green/K13257%09green/K13264%09green
map00901	Metabolism	Biosynthesis of other secondary metabolites	Indole alkaloid biosynthesis	7	TRINITY_DN80552_c0_g1;TRINITY_DN80552_c0_g2;TRINITY_DN107408_c0_g1;TRINITY_DN23668_c0_g1;TRINITY_DN2625_c0_g1;TRINITY_DN19710_c0_g1;TRINITY_DN24698_c0_g2	map00901.png	http://www.genome.jp/dbget-bin/show_pathway?map00901/K08233%09green/K01593%09green/K21026%09green
map00950	Metabolism	Biosynthesis of other secondary metabolites	Isoquinoline alkaloid biosynthesis	63	TRINITY_DN39006_c0_g1;TRINITY_DN34540_c0_g1;TRINITY_DN107408_c0_g1;TRINITY_DN101587_c0_g1;TRINITY_DN26101_c0_g1;TRINITY_DN9618_c0_g1;TRINITY_DN17870_c0_g1;TRINITY_DN10293_c0_g1;TRINITY_DN94719_c0_g1;TRINITY_DN37211_c0_g3;TRINITY_DN30096_c0_g1;TRINITY_DN18356_c0_g2;TRINITY_DN91889_c0_g1;TRINITY_DN91889_c0_g2;TRINITY_DN74909_c0_g1;TRINITY_DN5589_c0_g1;TRINITY_DN59206_c0_g1;TRINITY_DN55285_c0_g1;TRI…	map00950.png	http://www.genome.jp/dbget-bin/show_pathway?map00950/K00276%09green/K14455%09green/K14454%09green/K15849%09green/K13384%09green/K00811%09green/K01592%09green/K01593%09green/K00422%09green/K00815%09green
map00960	Metabolism	Biosynthesis of other secondary metabolites	Tropane, piperidine and pyridine alkaloid biosynthesis	45	TRINITY_DN42570_c0_g1;TRINITY_DN22700_c0_g1;TRINITY_DN101587_c0_g1;TRINITY_DN17870_c0_g1;TRINITY_DN4591_c0_g1;TRINITY_DN10293_c0_g1;TRINITY_DN94719_c0_g1;TRINITY_DN6885_c0_g1;TRINITY_DN18356_c0_g2;TRINITY_DN74909_c0_g1;TRINITY_DN65426_c0_g1;TRINITY_DN28802_c0_g1;TRINITY_DN12740_c0_g1;TRINITY_DN79801_c0_g1;TRINITY_DN55285_c0_g1;TRINITY_DN11138_c0_g1;TRINITY_DN800_c0_g1;TRINITY_DN832_c0_g1;TRINITY_…	map00960.png	http://www.genome.jp/dbget-bin/show_pathway?map00960/K00276%09green/K14455%09green/K14454%09green/K19861%09green/K15849%09green/K00811%09green/K13610%09green/K00815%09green/K08081%09green/K00817%09green
map00232	Metabolism	Biosynthesis of other secondary metabolites	Caffeine metabolism	2	TRINITY_DN32852_c0_g1;TRINITY_DN37228_c0_g1	map00232.png	http://www.genome.jp/dbget-bin/show_pathway?map00232/K00106%09green/K00365%09green
map00965	Metabolism	Biosynthesis of other secondary metabolites	Betalain biosynthesis	4	TRINITY_DN107408_c0_g1;TRINITY_DN84352_c0_g1;TRINITY_DN13560_c0_g1;TRINITY_DN39_c0_g1	map00965.png	http://www.genome.jp/dbget-bin/show_pathway?map00965/K15777%09green/K01593%09green
map00966	Metabolism	Biosynthesis of other secondary metabolites	Glucosinolate biosynthesis	26	TRINITY_DN23360_c0_g1;TRINITY_DN36562_c0_g3;TRINITY_DN65595_c0_g1;TRINITY_DN89666_c0_g1;TRINITY_DN35756_c0_g1;TRINITY_DN20333_c0_g1;TRINITY_DN16711_c0_g1;TRINITY_DN16711_c0_g3;TRINITY_DN13402_c0_g1;TRINITY_DN13402_c0_g2;TRINITY_DN13402_c0_g3;TRINITY_DN7530_c0_g1;TRINITY_DN3137_c2_g1;TRINITY_DN44071_c0_g1;TRINITY_DN4065_c0_g1;TRINITY_DN29897_c0_g1;TRINITY_DN20480_c0_g1;TRINITY_DN72225_c0_g1;TRINIT…	map00966.png	http://www.genome.jp/dbget-bin/show_pathway?map00966/K01703%09green/K12153%09green/K11820%09green
map00261	Metabolism	Biosynthesis of other secondary metabolites	Monobactam biosynthesis	33	TRINITY_DN13910_c0_g2;TRINITY_DN3231_c1_g1;TRINITY_DN3231_c0_g1;TRINITY_DN3231_c0_g2;TRINITY_DN3231_c0_g3;TRINITY_DN7933_c0_g3;TRINITY_DN13175_c0_g1;TRINITY_DN65743_c0_g1;TRINITY_DN34272_c0_g1;TRINITY_DN15340_c0_g1;TRINITY_DN6883_c0_g1;TRINITY_DN2298_c0_g1;TRINITY_DN2298_c0_g2;TRINITY_DN32911_c0_g1;TRINITY_DN25378_c0_g1;TRINITY_DN55396_c0_g1;TRINITY_DN11626_c0_g1;TRINITY_DN13396_c1_g1;TRINITY_DN1…	map00261.png	http://www.genome.jp/dbget-bin/show_pathway?map00261/K00215%09green/K00133%09green/K13811%09green/K12524%09green/K01714%09green/K00928%09green
map00333	Metabolism	Biosynthesis of other secondary metabolites	Prodigiosin biosynthesis	20	TRINITY_DN2215_c1_g1;TRINITY_DN2215_c0_g1;TRINITY_DN1888_c0_g1;TRINITY_DN1888_c0_g2;TRINITY_DN69207_c1_g1;TRINITY_DN69207_c0_g1;TRINITY_DN53755_c0_g1;TRINITY_DN7498_c0_g1;TRINITY_DN13880_c0_g1;TRINITY_DN13880_c0_g2;TRINITY_DN11678_c0_g1;TRINITY_DN17066_c0_g1;TRINITY_DN40688_c1_g1;TRINITY_DN40688_c0_g1;TRINITY_DN40688_c0_g2;TRINITY_DN1315_c0_g1;TRINITY_DN15958_c2_g1;TRINITY_DN15926_c0_g1;TRINITY_D…	map00333.png	http://www.genome.jp/dbget-bin/show_pathway?map00333/K00645%09green/K00208%09green/K00059%09green
map00999	Metabolism	Biosynthesis of other secondary metabolites	Biosynthesis of secondary metabolites - unclassified	4	TRINITY_DN10968_c0_g1;TRINITY_DN40652_c0_g1;TRINITY_DN24659_c0_g1;TRINITY_DN18935_c0_g1	map00999.png	http://www.genome.jp/dbget-bin/show_pathway?map00999/K21371%09green/K21568%09green
map01062	Metabolism	Chemical structure transformation maps	Biosynthesis of terpenoids and steroids	9	TRINITY_DN23110_c0_g1;TRINITY_DN65937_c0_g2;TRINITY_DN17418_c0_g1;TRINITY_DN52272_c0_g1;TRINITY_DN62033_c0_g1;TRINITY_DN660_c0_g1;TRINITY_DN21023_c0_g1;TRINITY_DN21023_c0_g2;TRINITY_DN33671_c0_g1	map01062.png	http://www.genome.jp/dbget-bin/show_pathway?map01062/K02291%09green
map03020	Genetic Information Processing	Transcription	RNA polymerase	139	TRINITY_DN9245_c0_g1;TRINITY_DN3222_c1_g2;TRINITY_DN16330_c0_g1;TRINITY_DN7946_c0_g1;TRINITY_DN85935_c0_g1;TRINITY_DN12700_c0_g1;TRINITY_DN12633_c0_g1;TRINITY_DN12633_c0_g3;TRINITY_DN33182_c0_g1;TRINITY_DN2798_c1_g1;TRINITY_DN2798_c0_g1;TRINITY_DN597_c0_g1;TRINITY_DN83293_c0_g3;TRINITY_DN42552_c0_g6;TRINITY_DN80828_c0_g1;TRINITY_DN54548_c0_g1;TRINITY_DN101381_c0_g1;TRINITY_DN105561_c0_g1;TRINITY_…	map03020.png	http://www.genome.jp/dbget-bin/show_pathway?map03020/K02690%09green/K03000%09green/K03006%09green/K03021%09green/K03022%09green/K03023%09green/K03002%09green/K03025%09green/K03026%09green/K03027%09green/K03043%09green/K03040%09green/K03046%09green/K03008%09green/K03009%09green/K05658%09green/K02999%09green/K14721%09green/K18195%09green/K03881%09green/K03015%09green/K03014%09green/K03017%09green/K…
map03022	Genetic Information Processing	Transcription	Basal transcription factors	99	TRINITY_DN13984_c0_g2;TRINITY_DN92371_c0_g1;TRINITY_DN3257_c0_g1;TRINITY_DN3243_c0_g1;TRINITY_DN3243_c0_g2;TRINITY_DN28934_c0_g1;TRINITY_DN7949_c0_g1;TRINITY_DN7948_c0_g1;TRINITY_DN7948_c0_g2;TRINITY_DN27725_c0_g1;TRINITY_DN38985_c1_g1;TRINITY_DN12671_c1_g1;TRINITY_DN12671_c0_g1;TRINITY_DN12623_c0_g2;TRINITY_DN20153_c0_g1;TRINITY_DN20153_c0_g2;TRINITY_DN66055_c0_g1;TRINITY_DN80886_c0_g1;TRINITY_D…	map03022.png	http://www.genome.jp/dbget-bin/show_pathway?map03022/K03143%09green/K03142%09green/K03141%09green/K03144%09green/K03125%09green/K03124%09green/K03127%09green/K03126%09green/K03120%09green/K03123%09green/K03122%09green/K03129%09green/K03128%09green/K14651%09green/K14787%09green/K06634%09green/K11294%09green/K03136%09green/K03137%09green/K03134%09green/K03135%09green/K03132%09green/K03133%09green/K…
map03040	Genetic Information Processing	Transcription	Spliceosome	532	TRINITY_DN16681_c0_g1;TRINITY_DN82326_c0_g1;TRINITY_DN44327_c0_g1;TRINITY_DN44234_c0_g1;TRINITY_DN50183_c1_g1;TRINITY_DN93953_c0_g1;TRINITY_DN9550_c0_g1;TRINITY_DN9591_c0_g1;TRINITY_DN9591_c0_g2;TRINITY_DN3261_c0_g1;TRINITY_DN3234_c0_g1;TRINITY_DN3253_c1_g1;TRINITY_DN3253_c0_g1;TRINITY_DN65328_c1_g1;TRINITY_DN33569_c0_g2;TRINITY_DN16316_c0_g3;TRINITY_DN27027_c0_g1;TRINITY_DN171_c1_g1;TRINITY_DN17…	map03040.png	http://www.genome.jp/dbget-bin/show_pathway?map03040/K10599%09green/K12733%09green/K05287%09green/K12880%09green/K12881%09green/K12882%09green/K12883%09green/K12885%09green/K12886%09green/K12888%09green/K11099%09green/K12817%09green/K12816%09green/K12815%09green/K12813%09green/K12812%09green/K12811%09green/K09564%09green/K12819%09green/K12818%09green/K12897%09green/K12896%09green/K12893%09green/K…
map03010	Genetic Information Processing	Translation	Ribosome	937	TRINITY_DN16680_c0_g2;TRINITY_DN72660_c0_g1;TRINITY_DN27766_c2_g1;TRINITY_DN92335_c0_g3;TRINITY_DN9518_c1_g1;TRINITY_DN9518_c0_g1;TRINITY_DN67362_c0_g1;TRINITY_DN78062_c0_g2;TRINITY_DN78085_c0_g1;TRINITY_DN3225_c0_g2;TRINITY_DN3235_c2_g1;TRINITY_DN49093_c0_g2;TRINITY_DN16348_c0_g1;TRINITY_DN81544_c0_g1;TRINITY_DN81514_c0_g1;TRINITY_DN64822_c0_g2;TRINITY_DN64833_c0_g1;TRINITY_DN64897_c0_g1;TRINITY…	map03010.png	http://www.genome.jp/dbget-bin/show_pathway?map03010/K02957%09green/K02955%09green/K02889%09green/K02888%09green/K02951%09green/K02950%09green/K02885%09green/K02884%09green/K02887%09green/K02886%09green/K02881%09green/K02880%09green/K02883%09green/K02882%09green/K09284%09green/K02922%09green/K02923%09green/K02920%09green/K02921%09green/K02926%09green/K02927%09green/K02924%09green/K02925%09green/K…
map00970	Genetic Information Processing	Translation	Aminoacyl-tRNA biosynthesis	117	TRINITY_DN82397_c0_g1;TRINITY_DN13991_c0_g1;TRINITY_DN37762_c0_g1;TRINITY_DN90193_c0_g2;TRINITY_DN160_c1_g1;TRINITY_DN3740_c0_g1;TRINITY_DN3740_c0_g2;TRINITY_DN33206_c0_g1;TRINITY_DN77356_c0_g1;TRINITY_DN83711_c0_g1;TRINITY_DN23369_c0_g1;TRINITY_DN22647_c0_g1;TRINITY_DN17693_c0_g1;TRINITY_DN51750_c0_g1;TRINITY_DN32679_c0_g1;TRINITY_DN29290_c0_g4;TRINITY_DN759_c0_g1;TRINITY_DN41966_c0_g1;TRINITY_D…	map00970.png	http://www.genome.jp/dbget-bin/show_pathway?map00970/K01870%09green/K01873%09green/K01872%09green/K01875%09green/K01874%09green/K01876%09green/K14164%09green/K02434%09green/K02435%09green/K04567%09green/K02433%09green/K01893%09green/K01892%09green/K01890%09green/K01866%09green/K01867%09green/K01868%09green/K01869%09green/K01880%09green/K01881%09green/K01883%09green/K01885%09green/K01886%09green/K…
map03013	Genetic Information Processing	Translation	RNA transport	778	TRINITY_DN16648_c0_g1;TRINITY_DN8206_c0_g1;TRINITY_DN8213_c0_g1;TRINITY_DN82394_c0_g1;TRINITY_DN13907_c0_g1;TRINITY_DN13986_c0_g1;TRINITY_DN44234_c0_g1;TRINITY_DN92324_c0_g1;TRINITY_DN93905_c0_g3;TRINITY_DN32774_c0_g1;TRINITY_DN9297_c0_g1;TRINITY_DN9297_c0_g2;TRINITY_DN33963_c0_g1;TRINITY_DN56415_c1_g1;TRINITY_DN56415_c0_g2;TRINITY_DN56429_c0_g1;TRINITY_DN3212_c0_g1;TRINITY_DN3253_c1_g1;TRINITY_D…	map03013.png	http://www.genome.jp/dbget-bin/show_pathway?map03013/K18723%09green/K14301%09green/K14300%09green/K14303%09green/K01444%09green/K14304%09green/K14307%09green/K14306%09green/K14309%09green/K14308%09green/K12880%09green/K12881%09green/K12882%09green/K12883%09green/K13126%09green/K13108%09green/K03239%09green/K14288%09green/K12812%09green/K03231%09green/K03237%09green/K03236%09green/K13137%09green/K…
map03015	Genetic Information Processing	Translation	mRNA surveillance pathway	424	TRINITY_DN16661_c0_g2;TRINITY_DN72628_c0_g1;TRINITY_DN27735_c0_g1;TRINITY_DN13907_c0_g1;TRINITY_DN13986_c0_g1;TRINITY_DN44255_c0_g1;TRINITY_DN92324_c0_g1;TRINITY_DN93905_c0_g3;TRINITY_DN92928_c0_g1;TRINITY_DN3253_c1_g1;TRINITY_DN3253_c0_g1;TRINITY_DN3260_c0_g1;TRINITY_DN37731_c0_g1;TRINITY_DN65382_c0_g1;TRINITY_DN45231_c0_g1;TRINITY_DN45201_c0_g1;TRINITY_DN45201_c0_g2;TRINITY_DN64832_c0_g1;TRINIT…	map03015.png	http://www.genome.jp/dbget-bin/show_pathway?map03015/K08873%09green/K13114%09green/K06965%09green/K03267%09green/K03265%09green/K18624%09green/K14327%09green/K14326%09green/K14325%09green/K14324%09green/K04354%09green/K06100%09green/K11584%09green/K12881%09green/K12882%09green/K12883%09green/K00565%09green/K13108%09green/K14401%09green/K13025%09green/K15542%09green/K11583%09green/K14411%09green/K…
map03008	Genetic Information Processing	Translation	Ribosome biogenesis in eukaryotes	225	TRINITY_DN27797_c0_g1;TRINITY_DN82394_c0_g1;TRINITY_DN57033_c0_g1;TRINITY_DN57033_c0_g2;TRINITY_DN7915_c0_g2;TRINITY_DN38358_c0_g2;TRINITY_DN8953_c0_g1;TRINITY_DN8980_c0_g1;TRINITY_DN22451_c0_g1;TRINITY_DN12649_c0_g1;TRINITY_DN34558_c0_g1;TRINITY_DN15747_c0_g1;TRINITY_DN61783_c0_g1;TRINITY_DN23126_c0_g1;TRINITY_DN80851_c0_g1;TRINITY_DN1445_c0_g1;TRINITY_DN69751_c0_g1;TRINITY_DN103190_c0_g1;TRINIT…	map03008.png	http://www.genome.jp/dbget-bin/show_pathway?map03008/K11108%09green/K03264%09green/K11129%09green/K14545%09green/K12845%09green/K12619%09green/K11128%09green/K14572%09green/K14573%09green/K14570%09green/K07562%09green/K14558%09green/K14559%09green/K14574%09green/K14575%09green/K14554%09green/K14555%09green/K14556%09green/K14557%09green/K14550%09green/K14552%09green/K14553%09green/K07936%09green/K…
map03060	Genetic Information Processing	Folding, sorting and degradation	Protein export	117	TRINITY_DN23287_c0_g1;TRINITY_DN23287_c0_g2;TRINITY_DN23098_c0_g1;TRINITY_DN23043_c0_g1;TRINITY_DN7922_c1_g2;TRINITY_DN7922_c1_g1;TRINITY_DN7940_c0_g2;TRINITY_DN67342_c0_g2;TRINITY_DN525_c0_g1;TRINITY_DN525_c0_g2;TRINITY_DN47714_c0_g1;TRINITY_DN103056_c0_g1;TRINITY_DN100980_c0_g1;TRINITY_DN11780_c0_g1;TRINITY_DN49461_c0_g1;TRINITY_DN724_c0_g1;TRINITY_DN8529_c0_g1;TRINITY_DN11288_c0_g2;TRINITY_DN6…	map03060.png	http://www.genome.jp/dbget-bin/show_pathway?map03060/K09647%09green/K03109%09green/K03108%09green/K03107%09green/K03106%09green/K09648%09green/K03104%09green/K03105%09green/K03100%09green/K12948%09green/K10956%09green/K12946%09green/K13431%09green/K03070%09green/K03217%09green/K03116%09green/K03118%09green/K09481%09green/K09490%09green/K09540%09green/K13280%09green/K07342%09green/K12275%09green/K…
map04141	Genetic Information Processing	Folding, sorting and degradation	Protein processing in endoplasmic reticulum	633	TRINITY_DN76293_c0_g1;TRINITY_DN8284_c0_g1;TRINITY_DN36588_c0_g1;TRINITY_DN13992_c0_g1;TRINITY_DN44314_c0_g1;TRINITY_DN44314_c0_g2;TRINITY_DN92337_c0_g1;TRINITY_DN9521_c0_g1;TRINITY_DN9550_c0_g1;TRINITY_DN9591_c0_g1;TRINITY_DN9591_c0_g2;TRINITY_DN9536_c0_g1;TRINITY_DN56374_c1_g1;TRINITY_DN78154_c0_g1;TRINITY_DN3295_c0_g1;TRINITY_DN37691_c0_g1;TRINITY_DN40740_c0_g1;TRINITY_DN40719_c0_g1;TRINITY_DN…	map04141.png	http://www.genome.jp/dbget-bin/show_pathway?map04141/K16196%09green/K10601%09green/K12670%09green/K06689%09green/K13989%09green/K13984%09green/K10661%09green/K10666%09green/K04554%09green/K08852%09green/K05546%09green/K04523%09green/K10575%09green/K09518%09green/K01456%09green/K09027%09green/K07342%09green/K10085%09green/K04374%09green/K13719%09green/K09517%09green/K14026%09green/K09487%09green/K…
map04130	Genetic Information Processing	Folding, sorting and degradation	SNARE interactions in vesicular transport	60	TRINITY_DN111_c0_g2;TRINITY_DN65740_c0_g1;TRINITY_DN3593_c0_g1;TRINITY_DN30017_c0_g2;TRINITY_DN11807_c0_g1;TRINITY_DN6888_c0_g1;TRINITY_DN11897_c0_g1;TRINITY_DN11897_c0_g2;TRINITY_DN2205_c0_g1;TRINITY_DN2205_c0_g2;TRINITY_DN7206_c0_g1;TRINITY_DN969_c0_g1;TRINITY_DN969_c0_g2;TRINITY_DN23597_c0_g1;TRINITY_DN53801_c0_g3;TRINITY_DN86355_c0_g1;TRINITY_DN86355_c0_g2;TRINITY_DN14612_c0_g1;TRINITY_DN1091…	map04130.png	http://www.genome.jp/dbget-bin/show_pathway?map04130/K08495%09green/K08496%09green/K08497%09green/K08490%09green/K08486%09green/K08492%09green/K08493%09green/K08489%09green/K08488%09green/K08498%09green/K08503%09green/K08506%09green/K08507%09green/K08517%09green/K08516%09green/K08515%09green/K08505%09green/K08504%09green
map04120	Genetic Information Processing	Folding, sorting and degradation	Ubiquitin mediated proteolysis	365	TRINITY_DN76312_c0_g1;TRINITY_DN27808_c0_g1;TRINITY_DN36588_c0_g1;TRINITY_DN13956_c0_g1;TRINITY_DN56374_c1_g1;TRINITY_DN72001_c0_g1;TRINITY_DN16352_c1_g1;TRINITY_DN27080_c0_g1;TRINITY_DN27080_c0_g2;TRINITY_DN81520_c0_g1;TRINITY_DN28922_c0_g1;TRINITY_DN142_c0_g1;TRINITY_DN142_c0_g2;TRINITY_DN142_c0_g3;TRINITY_DN142_c1_g3;TRINITY_DN142_c1_g2;TRINITY_DN142_c1_g1;TRINITY_DN105_c1_g1;TRINITY_DN105_c2_…	map04120.png	http://www.genome.jp/dbget-bin/show_pathway?map04120/K10601%09green/K10597%09green/K10590%09green/K10591%09green/K10592%09green/K06688%09green/K10576%09green/K10609%09green/K10575%09green/K10598%09green/K04554%09green/K10570%09green/K10571%09green/K10140%09green/K10604%09green/K03868%09green/K06689%09green/K04649%09green/K10579%09green/K10599%09green/K04706%09green/K20217%09green/K03352%09green/K…
map04122	Genetic Information Processing	Folding, sorting and degradation	Sulfur relay system	18	TRINITY_DN16312_c0_g1;TRINITY_DN7965_c0_g1;TRINITY_DN62159_c0_g1;TRINITY_DN11793_c0_g1;TRINITY_DN11793_c0_g2;TRINITY_DN6998_c0_g2;TRINITY_DN70118_c0_g1;TRINITY_DN10154_c0_g1;TRINITY_DN2284_c1_g2;TRINITY_DN2284_c1_g1;TRINITY_DN27380_c0_g1;TRINITY_DN13767_c0_g1;TRINITY_DN4993_c0_g1;TRINITY_DN19756_c0_g1;TRINITY_DN3363_c0_g1;TRINITY_DN1092_c1_g1;TRINITY_DN55890_c0_g1;TRINITY_DN22165_c0_g1	map04122.png	http://www.genome.jp/dbget-bin/show_pathway?map04122/K03635%09green/K04487%09green/K03637%09green/K12161%09green/K21232%09green/K01011%09green/K14169%09green/K14168%09green/K11996%09green
map03050	Genetic Information Processing	Folding, sorting and degradation	Proteasome	180	TRINITY_DN76324_c0_g1;TRINITY_DN8228_c0_g1;TRINITY_DN9509_c0_g1;TRINITY_DN9509_c0_g2;TRINITY_DN56338_c0_g2;TRINITY_DN75833_c0_g1;TRINITY_DN3211_c0_g1;TRINITY_DN65407_c0_g1;TRINITY_DN16355_c0_g1;TRINITY_DN38347_c0_g1;TRINITY_DN8957_c0_g1;TRINITY_DN8957_c0_g2;TRINITY_DN62163_c0_g1;TRINITY_DN3743_c0_g1;TRINITY_DN34493_c0_g1;TRINITY_DN42562_c0_g1;TRINITY_DN80508_c0_g1;TRINITY_DN17347_c0_g1;TRINITY_DN…	map03050.png	http://www.genome.jp/dbget-bin/show_pathway?map03050/K03064%09green/K03065%09green/K03066%09green/K03061%09green/K03062%09green/K03063%09green/K03028%09green/K03029%09green/K10881%09green/K02728%09green/K02729%09green/K02725%09green/K02726%09green/K02727%09green/K06691%09green/K06699%09green/K03039%09green/K03038%09green/K03037%09green/K03036%09green/K03035%09green/K03033%09green/K03032%09green/K…
map03018	Genetic Information Processing	Folding, sorting and degradation	RNA degradation	382	TRINITY_DN8214_c0_g1;TRINITY_DN88021_c0_g1;TRINITY_DN13977_c0_g1;TRINITY_DN13907_c0_g1;TRINITY_DN13999_c0_g1;TRINITY_DN92324_c0_g1;TRINITY_DN93905_c0_g3;TRINITY_DN34036_c0_g1;TRINITY_DN56396_c0_g1;TRINITY_DN79514_c0_g1;TRINITY_DN67346_c0_g1;TRINITY_DN91686_c1_g1;TRINITY_DN3281_c0_g1;TRINITY_DN64648_c0_g2;TRINITY_DN49151_c0_g1;TRINITY_DN65382_c0_g1;TRINITY_DN40776_c0_g1;TRINITY_DN40729_c0_g2;TRINI…	map03018.png	http://www.genome.jp/dbget-bin/show_pathway?map03018/K03679%09green/K03678%09green/K00850%09green/K12590%09green/K01689%09green/K01179%09green/K12625%09green/K12614%09green/K12617%09green/K12616%09green/K12592%09green/K12593%09green/K12613%09green/K12591%09green/K12586%09green/K12619%09green/K12598%09green/K12599%09green/K04043%09green/K03654%09green/K12626%09green/K12622%09green/K03514%09green/K…
map03030	Genetic Information Processing	Replication and repair	DNA replication	72	TRINITY_DN51434_c0_g1;TRINITY_DN51434_c0_g2;TRINITY_DN92958_c0_g1;TRINITY_DN49131_c0_g1;TRINITY_DN38304_c0_g3;TRINITY_DN46101_c0_g1;TRINITY_DN38468_c0_g1;TRINITY_DN17659_c0_g1;TRINITY_DN103138_c0_g1;TRINITY_DN102240_c0_g1;TRINITY_DN43198_c0_g1;TRINITY_DN33809_c0_g1;TRINITY_DN5903_c0_g1;TRINITY_DN6969_c0_g1;TRINITY_DN20340_c0_g1;TRINITY_DN20340_c0_g3;TRINITY_DN11214_c0_g2;TRINITY_DN6287_c0_g1;TRIN…	map03030.png	http://www.genome.jp/dbget-bin/show_pathway?map03030/K10745%09green/K10744%09green/K10747%09green/K10740%09green/K10743%09green/K10742%09green/K02210%09green/K04802%09green/K02212%09green/K02316%09green/K02335%09green/K07466%09green/K02209%09green/K10739%09green/K10756%09green/K10754%09green/K10755%09green/K02685%09green/K02684%09green/K02320%09green/K02321%09green/K02324%09green/K02325%09green/K…
map03410	Genetic Information Processing	Replication and repair	Base excision repair	90	TRINITY_DN8202_c1_g1;TRINITY_DN8202_c0_g1;TRINITY_DN9290_c0_g1;TRINITY_DN92958_c0_g1;TRINITY_DN67083_c0_g1;TRINITY_DN33214_c0_g1;TRINITY_DN38023_c0_g1;TRINITY_DN42541_c0_g1;TRINITY_DN47712_c0_g1;TRINITY_DN38468_c0_g1;TRINITY_DN4467_c0_g1;TRINITY_DN4416_c0_g1;TRINITY_DN16014_c0_g1;TRINITY_DN103138_c0_g1;TRINITY_DN107000_c0_g1;TRINITY_DN26049_c0_g1;TRINITY_DN722_c0_g1;TRINITY_DN10266_c0_g1;TRINITY_…	map03410.png	http://www.genome.jp/dbget-bin/show_pathway?map03410/K10747%09green/K01246%09green/K01247%09green/K04802%09green/K03504%09green/K02335%09green/K10798%09green/K03648%09green/K03512%09green/K10772%09green/K10773%09green/K01142%09green/K03660%09green/K03575%09green/K11296%09green/K02324%09green/K10563%09green/K02326%09green/K02327%09green/K02328%09green/K04799%09green/K03652%09green/K10801%09green/K…
map03420	Genetic Information Processing	Replication and repair	Nucleotide excision repair	111	TRINITY_DN51434_c0_g1;TRINITY_DN51434_c0_g2;TRINITY_DN13984_c0_g2;TRINITY_DN92371_c0_g1;TRINITY_DN92958_c0_g1;TRINITY_DN28934_c0_g1;TRINITY_DN7948_c0_g1;TRINITY_DN7948_c0_g2;TRINITY_DN22430_c0_g1;TRINITY_DN2704_c0_g2;TRINITY_DN61030_c0_g1;TRINITY_DN57414_c0_g1;TRINITY_DN46101_c0_g1;TRINITY_DN38468_c0_g1;TRINITY_DN16104_c0_g1;TRINITY_DN17678_c0_g2;TRINITY_DN100520_c0_g1;TRINITY_DN54154_c0_g1;TRINI…	map03420.png	http://www.genome.jp/dbget-bin/show_pathway?map03420/K03143%09green/K03142%09green/K03141%09green/K10740%09green/K03144%09green/K10609%09green/K10747%09green/K10570%09green/K04802%09green/K10755%09green/K02335%09green/K03868%09green/K07466%09green/K10839%09green/K10838%09green/K06634%09green/K10739%09green/K10756%09green/K10754%09green/K10140%09green/K10610%09green/K02324%09green/K02325%09green/K…
map03430	Genetic Information Processing	Replication and repair	Mismatch repair	72	TRINITY_DN51434_c0_g1;TRINITY_DN51434_c0_g2;TRINITY_DN13919_c0_g1;TRINITY_DN13964_c0_g1;TRINITY_DN92958_c0_g1;TRINITY_DN33631_c0_g1;TRINITY_DN21575_c0_g1;TRINITY_DN42555_c0_g1;TRINITY_DN46101_c0_g1;TRINITY_DN38468_c0_g1;TRINITY_DN103138_c0_g1;TRINITY_DN102240_c0_g1;TRINITY_DN43198_c0_g1;TRINITY_DN6969_c0_g1;TRINITY_DN20340_c0_g1;TRINITY_DN20340_c0_g3;TRINITY_DN94724_c0_g1;TRINITY_DN37188_c0_g1;TR…	map03430.png	http://www.genome.jp/dbget-bin/show_pathway?map03430/K08735%09green/K08734%09green/K08737%09green/K10746%09green/K10756%09green/K10740%09green/K07456%09green/K10754%09green/K10858%09green/K07466%09green/K08739%09green/K10747%09green/K04802%09green/K08736%09green/K03505%09green/K02327%09green/K02328%09green/K10739%09green/K10755%09green/K03504%09green
map03440	Genetic Information Processing	Replication and repair	Homologous recombination	115	TRINITY_DN51434_c0_g1;TRINITY_DN51434_c0_g2;TRINITY_DN56307_c0_g1;TRINITY_DN9519_c0_g1;TRINITY_DN92958_c0_g1;TRINITY_DN45159_c0_g1;TRINITY_DN45159_c0_g2;TRINITY_DN3719_c0_g1;TRINITY_DN46752_c0_g1;TRINITY_DN46744_c0_g1;TRINITY_DN46101_c0_g1;TRINITY_DN38468_c0_g1;TRINITY_DN102240_c0_g1;TRINITY_DN43198_c0_g1;TRINITY_DN49395_c0_g1;TRINITY_DN29576_c0_g1;TRINITY_DN41984_c0_g1;TRINITY_DN65549_c0_g1;TRIN…	map03440.png	http://www.genome.jp/dbget-bin/show_pathway?map03440/K10882%09green/K10740%09green/K10880%09green/K10881%09green/K02335%09green/K03165%09green/K10879%09green/K08991%09green/K04482%09green/K07466%09green/K10870%09green/K08775%09green/K10875%09green/K10739%09green/K04728%09green/K12173%09green/K03553%09green/K02327%09green/K02328%09green/K10728%09green/K10869%09green/K10901%09green/K11864%09green/K…
map03450	Genetic Information Processing	Replication and repair	Non-homologous end-joining	20	TRINITY_DN9507_c0_g1;TRINITY_DN33599_c0_g1;TRINITY_DN4416_c0_g1;TRINITY_DN103843_c0_g1;TRINITY_DN8504_c0_g1;TRINITY_DN4536_c0_g1;TRINITY_DN89940_c0_g1;TRINITY_DN6651_c0_g1;TRINITY_DN13378_c0_g1;TRINITY_DN78404_c1_g4;TRINITY_DN3407_c0_g1;TRINITY_DN13640_c0_g1;TRINITY_DN6123_c0_g1;TRINITY_DN33303_c0_g1;TRINITY_DN63081_c0_g1;TRINITY_DN31141_c0_g1;TRINITY_DN31141_c0_g2;TRINITY_DN9321_c0_g1;TRINITY_DN…	map03450.png	http://www.genome.jp/dbget-bin/show_pathway?map03450/K10886%09green/K10884%09green/K10885%09green/K10777%09green/K10865%09green/K10866%09green/K04799%09green/K03962%09green/K03512%09green
map02010	Environmental Information Processing	Membrane transport	ABC transporters	155	TRINITY_DN75867_c0_g1;TRINITY_DN64919_c0_g1;TRINITY_DN64919_c0_g2;TRINITY_DN73084_c0_g1;TRINITY_DN18703_c0_g1;TRINITY_DN62124_c0_g1;TRINITY_DN48076_c0_g1;TRINITY_DN47589_c0_g1;TRINITY_DN47589_c0_g2;TRINITY_DN15792_c0_g1;TRINITY_DN38430_c0_g1;TRINITY_DN22620_c0_g1;TRINITY_DN22706_c0_g1;TRINITY_DN43887_c0_g1;TRINITY_DN53127_c0_g1;TRINITY_DN53127_c0_g2;TRINITY_DN53127_c0_g3;TRINITY_DN77300_c0_g2;TRI…	map02010.png	http://www.genome.jp/dbget-bin/show_pathway?map02010/K05677%09green/K05656%09green/K05681%09green/K03006%09green/K05674%09green/K05658%09green/K05657%09green/K05663%09green/K05643%09green/K05666%09green
map04016	Environmental Information Processing	Signal transduction	MAPK signaling pathway - plant	338	TRINITY_DN16625_c1_g1;TRINITY_DN56383_c0_g1;TRINITY_DN75918_c0_g1;TRINITY_DN75918_c0_g2;TRINITY_DN37761_c1_g1;TRINITY_DN37761_c0_g2;TRINITY_DN37761_c0_g3;TRINITY_DN37769_c0_g1;TRINITY_DN33646_c0_g1;TRINITY_DN16390_c1_g1;TRINITY_DN16390_c0_g1;TRINITY_DN64840_c0_g1;TRINITY_DN64840_c0_g2;TRINITY_DN28893_c0_g1;TRINITY_DN150_c0_g1;TRINITY_DN7973_c0_g1;TRINITY_DN8932_c1_g2;TRINITY_DN8932_c1_g1;TRINITY_…	map04016.png	http://www.genome.jp/dbget-bin/show_pathway?map04016/K17686%09green/K20714%09green/K20603%09green/K20725%09green/K20726%09green/K20558%09green/K20607%09green/K14509%09green/K20604%09green/K20537%09green/K13414%09green/K13416%09green/K13413%09green/K13418%09green/K20729%09green/K14510%09green/K14512%09green/K14513%09green/K14514%09green/K14515%09green/K14516%09green/K02183%09green/K03781%09green/K…
map04070	Environmental Information Processing	Signal transduction	Phosphatidylinositol signaling system	245	TRINITY_DN72680_c0_g1;TRINITY_DN88003_c0_g1;TRINITY_DN88003_c0_g3;TRINITY_DN32787_c0_g1;TRINITY_DN34032_c0_g1;TRINITY_DN9542_c0_g1;TRINITY_DN72024_c2_g1;TRINITY_DN50939_c0_g1;TRINITY_DN50887_c0_g1;TRINITY_DN113_c0_g1;TRINITY_DN67113_c0_g1;TRINITY_DN18634_c0_g1;TRINITY_DN18667_c0_g1;TRINITY_DN85599_c0_g1;TRINITY_DN12666_c0_g1;TRINITY_DN12666_c0_g2;TRINITY_DN13146_c0_g1;TRINITY_DN48123_c1_g1;TRINIT…	map04070.png	http://www.genome.jp/dbget-bin/show_pathway?map04070/K00999%09green/K18649%09green/K01110%09green/K10572%09green/K00915%09green/K00914%09green/K00913%09green/K05860%09green/K13024%09green/K00889%09green/K00888%09green/K00981%09green/K05857%09green/K00921%09green/K00901%09green/K01106%09green/K10047%09green/K01092%09green/K01099%09green/K18081%09green/K02183%09green/K19801%09green/K15422%09green
map04075	Environmental Information Processing	Signal transduction	Plant hormone signal transduction	639	TRINITY_DN16660_c0_g1;TRINITY_DN16625_c0_g1;TRINITY_DN76315_c0_g1;TRINITY_DN72622_c1_g2;TRINITY_DN8287_c1_g1;TRINITY_DN51442_c0_g4;TRINITY_DN51442_c0_g5;TRINITY_DN51442_c0_g2;TRINITY_DN51442_c0_g3;TRINITY_DN51442_c1_g2;TRINITY_DN93982_c0_g1;TRINITY_DN32841_c0_g2;TRINITY_DN32840_c0_g1;TRINITY_DN32835_c0_g1;TRINITY_DN9261_c0_g1;TRINITY_DN9209_c0_g1;TRINITY_DN9209_c0_g2;TRINITY_DN56383_c0_g1;TRINITY…	map04075.png	http://www.genome.jp/dbget-bin/show_pathway?map04075/K14486%09green/K14487%09green/K14484%09green/K14485%09green/K10604%09green/K14488%09green/K14489%09green/K13946%09green/K14490%09green/K13415%09green/K13416%09green/K14432%09green/K14431%09green/K13413%09green/K13418%09green/K14510%09green/K14512%09green/K14513%09green/K14514%09green/K14515%09green/K14516%09green/K14495%09green/K14494%09green/K…
map04144	Cellular Processes	Transport and catabolism	Endocytosis	706	TRINITY_DN8210_c0_g2;TRINITY_DN27815_c0_g1;TRINITY_DN36620_c0_g1;TRINITY_DN88003_c0_g1;TRINITY_DN88003_c0_g3;TRINITY_DN44253_c0_g1;TRINITY_DN44253_c0_g2;TRINITY_DN44262_c0_g1;TRINITY_DN32787_c0_g1;TRINITY_DN32785_c0_g1;TRINITY_DN9560_c0_g1;TRINITY_DN9560_c0_g2;TRINITY_DN9550_c0_g1;TRINITY_DN9591_c0_g1;TRINITY_DN9591_c0_g2;TRINITY_DN91692_c0_g1;TRINITY_DN3216_c1_g2;TRINITY_DN3216_c1_g1;TRINITY_DN3…	map04144.png	http://www.genome.jp/dbget-bin/show_pathway?map04144/K11247%09green/K10591%09green/K04043%09green/K04551%09green/K12472%09green/K19367%09green/K01115%09green/K10396%09green/K12195%09green/K07889%09green/K12471%09green/K12194%09green/K19366%09green/K07904%09green/K12479%09green/K07887%09green/K19476%09green/K02977%09green/K12192%09green/K12193%09green/K12190%09green/K12191%09green/K18442%09green/K…
map04145	Cellular Processes	Transport and catabolism	Phagosome	323	TRINITY_DN76293_c0_g1;TRINITY_DN72680_c0_g1;TRINITY_DN82364_c0_g1;TRINITY_DN13947_c0_g1;TRINITY_DN56253_c0_g1;TRINITY_DN56253_c0_g2;TRINITY_DN9560_c0_g1;TRINITY_DN9560_c0_g2;TRINITY_DN99331_c1_g1;TRINITY_DN99331_c0_g1;TRINITY_DN99331_c0_g2;TRINITY_DN3220_c0_g1;TRINITY_DN3220_c0_g2;TRINITY_DN49093_c0_g3;TRINITY_DN63474_c0_g1;TRINITY_DN78933_c0_g1;TRINITY_DN23043_c0_g1;TRINITY_DN103_c1_g2;TRINITY_D…	map04145.png	http://www.genome.jp/dbget-bin/show_pathway?map04145/K08517%09green/K01365%09green/K16857%09green/K00914%09green/K07889%09green/K04392%09green/K02155%09green/K02154%09green/K02153%09green/K02152%09green/K02151%09green/K02150%09green/K06751%09green/K05719%09green/K10956%09green/K08488%09green/K07374%09green/K07375%09green/K07887%09green/K05692%09green/K07976%09green/K03661%09green/K01371%09green/K…
map04146	Cellular Processes	Transport and catabolism	Peroxisome	199	TRINITY_DN8278_c0_g1;TRINITY_DN27738_c0_g1;TRINITY_DN13927_c0_g1;TRINITY_DN32852_c0_g1;TRINITY_DN9269_c0_g1;TRINITY_DN33985_c0_g2;TRINITY_DN3201_c0_g1;TRINITY_DN66231_c0_g1;TRINITY_DN23069_c0_g1;TRINITY_DN18689_c0_g2;TRINITY_DN38281_c1_g1;TRINITY_DN38281_c0_g1;TRINITY_DN3707_c0_g1;TRINITY_DN12668_c0_g1;TRINITY_DN61087_c0_g1;TRINITY_DN39810_c0_g1;TRINITY_DN39810_c0_g2;TRINITY_DN65047_c1_g2;TRINITY…	map04146.png	http://www.genome.jp/dbget-bin/show_pathway?map04146/K11517%09green/K11147%09green/K03386%09green/K00830%09green/K03781%09green/K01640%09green/K05677%09green/K04564%09green/K13279%09green/K13348%09green/K04565%09green/K01578%09green/K14729%09green/K13237%09green/K01897%09green/K13341%09green/K13342%09green/K13343%09green/K13344%09green/K13345%09green/K13346%09green/K13347%09green/K00031%09green/K…
map04217	Cellular Processes	Cell growth and death	Necroptosis	243	TRINITY_DN8210_c0_g2;TRINITY_DN88037_c0_g1;TRINITY_DN9290_c0_g1;TRINITY_DN78154_c0_g1;TRINITY_DN3289_c0_g1;TRINITY_DN37740_c0_g1;TRINITY_DN16328_c1_g1;TRINITY_DN27116_c0_g1;TRINITY_DN137_c0_g1;TRINITY_DN67083_c0_g1;TRINITY_DN82889_c0_g2;TRINITY_DN82876_c0_g1;TRINITY_DN27863_c0_g1;TRINITY_DN13114_c0_g1;TRINITY_DN38029_c0_g1;TRINITY_DN582_c0_g1;TRINITY_DN42541_c0_g1;TRINITY_DN37584_c0_g1;TRINITY_DN…	map04217.png	http://www.genome.jp/dbget-bin/show_pathway?map04217/K04515%09green/K05863%09green/K01915%09green/K12192%09green/K12193%09green/K00261%09green/K12191%09green/K12196%09green/K12197%09green/K00522%09green/K12195%09green/K10798%09green/K15053%09green/K00688%09green/K11251%09green/K03767%09green/K13462%09green/K11296%09green/K12198%09green/K13625%09green/K12194%09green/K10802%09green/K03845%09green/K…
map04218	Cellular Processes	Cell growth and death	Cellular senescence	253	TRINITY_DN36597_c0_g1;TRINITY_DN88037_c0_g3;TRINITY_DN50181_c0_g1;TRINITY_DN9532_c0_g1;TRINITY_DN9532_c0_g2;TRINITY_DN50939_c0_g1;TRINITY_DN16328_c1_g1;TRINITY_DN64832_c0_g1;TRINITY_DN67113_c0_g1;TRINITY_DN38323_c0_g1;TRINITY_DN3742_c0_g1;TRINITY_DN3722_c1_g1;TRINITY_DN38009_c0_g1;TRINITY_DN582_c0_g1;TRINITY_DN539_c0_g1;TRINITY_DN39842_c0_g1;TRINITY_DN39799_c0_g1;TRINITY_DN39799_c0_g2;TRINITY_DN6…	map04218.png	http://www.genome.jp/dbget-bin/show_pathway?map04218/K06640%09green/K01110%09green/K10994%09green/K04728%09green/K15040%09green/K10752%09green/K10030%09green/K06751%09green/K10866%09green/K05868%09green/K05864%09green/K05863%09green/K04371%09green/K06269%09green/K06268%09green/K02183%09green/K09389%09green/K10867%09green/K04681%09green/K04503%09green/K04464%09green/K02206%09green/K18753%09green/K…
map04625	Organismal Systems	Immune system	C-type lectin receptor signaling pathway	33	TRINITY_DN11739_c0_g1;TRINITY_DN34138_c0_g1;TRINITY_DN28473_c0_g1;TRINITY_DN35708_c0_g1;TRINITY_DN35708_c0_g2;TRINITY_DN24992_c0_g1;TRINITY_DN24992_c0_g2;TRINITY_DN77513_c2_g1;TRINITY_DN57199_c0_g1;TRINITY_DN23871_c1_g1;TRINITY_DN23871_c0_g1;TRINITY_DN15263_c0_g1;TRINITY_DN15263_c0_g2;TRINITY_DN4253_c0_g1;TRINITY_DN16923_c0_g2;TRINITY_DN32110_c0_g1;TRINITY_DN43504_c0_g1;TRINITY_DN87777_c0_g1;TRIN…	map04625.png	http://www.genome.jp/dbget-bin/show_pathway?map04625/K04371%09green/K02183%09green/K06268%09green/K04464%09green
map04926	Organismal Systems	Endocrine system	Relaxin signaling pathway	16	TRINITY_DN83272_c0_g1;TRINITY_DN106429_c0_g1;TRINITY_DN35708_c0_g1;TRINITY_DN35708_c0_g2;TRINITY_DN1542_c1_g1;TRINITY_DN1542_c0_g1;TRINITY_DN1542_c0_g2;TRINITY_DN81812_c0_g1;TRINITY_DN32110_c0_g1;TRINITY_DN59245_c0_g1;TRINITY_DN61425_c0_g1;TRINITY_DN93077_c0_g1;TRINITY_DN68860_c0_g1;TRINITY_DN68860_c0_g2;TRINITY_DN99930_c0_g1;TRINITY_DN10643_c0_g1	map04926.png	http://www.genome.jp/dbget-bin/show_pathway?map04926/K04536%09green/K01388%09green/K04464%09green/K04368%09green/K19720%09green/K04371%09green/K04632%09green/K06236%09green/K04374%09green
map04928	Organismal Systems	Endocrine system	Parathyroid hormone synthesis, secretion and action	64	TRINITY_DN8297_c0_g1;TRINITY_DN67446_c0_g1;TRINITY_DN18636_c1_g2;TRINITY_DN18636_c1_g1;TRINITY_DN18636_c0_g1;TRINITY_DN57386_c0_g1;TRINITY_DN43881_c0_g1;TRINITY_DN106429_c0_g1;TRINITY_DN107751_c0_g1;TRINITY_DN29639_c0_g1;TRINITY_DN35708_c0_g1;TRINITY_DN35708_c0_g2;TRINITY_DN10209_c0_g1;TRINITY_DN68213_c0_g1;TRINITY_DN22717_c1_g1;TRINITY_DN17568_c0_g1;TRINITY_DN91938_c0_g1;TRINITY_DN10106_c0_g1;TR…	map04928.png	http://www.genome.jp/dbget-bin/show_pathway?map04928/K03626%09green/K09260%09green/K17895%09green/K04464%09green/K01115%09green/K04368%09green/K04371%09green/K04632%09green/K04374%09green
map04927	Organismal Systems	Endocrine system	Cortisol synthesis and secretion	15	TRINITY_DN13925_c3_g1;TRINITY_DN9283_c0_g1;TRINITY_DN23277_c0_g1;TRINITY_DN38724_c0_g1;TRINITY_DN89591_c0_g2;TRINITY_DN106915_c0_g1;TRINITY_DN106429_c0_g1;TRINITY_DN11791_c0_g1;TRINITY_DN66687_c0_g1;TRINITY_DN64285_c0_g1;TRINITY_DN23573_c0_g1;TRINITY_DN52543_c0_g1;TRINITY_DN99930_c0_g1;TRINITY_DN49310_c0_g1;TRINITY_DN5691_c0_g1	map04927.png	http://www.genome.jp/dbget-bin/show_pathway?map04927/K04632%09green/K00512%09green/K07418%09green/K04374%09green
map04979	Organismal Systems	Digestive system	Cholesterol metabolism	37	TRINITY_DN27835_c0_g1;TRINITY_DN72058_c0_g1;TRINITY_DN3717_c0_g2;TRINITY_DN582_c0_g1;TRINITY_DN15787_c1_g1;TRINITY_DN15787_c0_g1;TRINITY_DN33404_c0_g1;TRINITY_DN792_c0_g1;TRINITY_DN15607_c0_g1;TRINITY_DN66428_c0_g1;TRINITY_DN41734_c0_g1;TRINITY_DN41734_c0_g2;TRINITY_DN1853_c1_g1;TRINITY_DN72811_c0_g2;TRINITY_DN39602_c0_g1;TRINITY_DN39602_c0_g2;TRINITY_DN10910_c0_g1;TRINITY_DN10910_c0_g2;TRINITY_D…	map04979.png	http://www.genome.jp/dbget-bin/show_pathway?map04979/K20464%09green/K04524%09green/K12385%09green/K15040%09green/K01052%09green/K05770%09green
map04712	Organismal Systems	Environmental adaptation	Circadian rhythm - plant	150	TRINITY_DN13982_c0_g1;TRINITY_DN49074_c0_g1;TRINITY_DN49074_c0_g2;TRINITY_DN50943_c0_g1;TRINITY_DN50943_c0_g2;TRINITY_DN64884_c0_g1;TRINITY_DN94344_c0_g1;TRINITY_DN173_c0_g1;TRINITY_DN7933_c0_g2;TRINITY_DN18615_c0_g1;TRINITY_DN8970_c0_g1;TRINITY_DN39060_c0_g1;TRINITY_DN34558_c0_g1;TRINITY_DN20196_c0_g1;TRINITY_DN15747_c0_g1;TRINITY_DN23169_c0_g1;TRINITY_DN66106_c0_g1;TRINITY_DN1445_c0_g1;TRINITY_…	map04712.png	http://www.genome.jp/dbget-bin/show_pathway?map04712/K10143%09green/K16241%09green/K12118%09green/K16223%09green/K12119%09green/K16240%09green/K12124%09green/K12116%09green/K12115%09green/K12121%09green/K12120%09green/K12130%09green/K12126%09green/K12125%09green/K12133%09green/K00660%09green/K12127%09green/K12129%09green/K03097%09green/K03115%09green
map04714	Organismal Systems	Environmental adaptation	Thermogenesis	474	TRINITY_DN76250_c0_g1;TRINITY_DN82364_c0_g1;TRINITY_DN93994_c0_g1;TRINITY_DN32826_c0_g1;TRINITY_DN79501_c0_g1;TRINITY_DN67425_c0_g1;TRINITY_DN3284_c0_g1;TRINITY_DN66169_c0_g2;TRINITY_DN66231_c0_g1;TRINITY_DN16394_c0_g1;TRINITY_DN16394_c0_g2;TRINITY_DN23295_c0_g1;TRINITY_DN94834_c0_g1;TRINITY_DN28933_c1_g2;TRINITY_DN28933_c1_g1;TRINITY_DN145_c0_g1;TRINITY_DN99562_c0_g3;TRINITY_DN83982_c1_g1;TRINIT…	map04714.png	http://www.genome.jp/dbget-bin/show_pathway?map04714/K02256%09green/K02257%09green/K11450%09green/K02258%09green/K02259%09green/K18159%09green/K11340%09green/K03949%09green/K03948%09green/K03943%09green/K03942%09green/K03941%09green/K03940%09green/K03946%09green/K05692%09green/K00416%09green/K02128%09green/K02129%09green/K11353%09green/K11352%09green/K02126%09green/K03938%09green/K03939%09green/K…
map04626	Organismal Systems	Environmental adaptation	Plant-pathogen interaction	435	TRINITY_DN16624_c0_g1;TRINITY_DN16625_c1_g1;TRINITY_DN50257_c0_g1;TRINITY_DN9267_c0_g1;TRINITY_DN78154_c0_g1;TRINITY_DN73021_c0_g1;TRINITY_DN27116_c0_g1;TRINITY_DN64893_c0_g1;TRINITY_DN63439_c0_g1;TRINITY_DN63439_c0_g2;TRINITY_DN7974_c0_g1;TRINITY_DN8955_c0_g1;TRINITY_DN8955_c0_g2;TRINITY_DN8984_c1_g1;TRINITY_DN8984_c0_g1;TRINITY_DN8971_c0_g1;TRINITY_DN8971_c0_g2;TRINITY_DN8977_c0_g1;TRINITY_DN27…	map04626.png	http://www.genome.jp/dbget-bin/show_pathway?map04626/K18835%09green/K12795%09green/K13414%09green/K13416%09green/K09487%09green/K13412%09green/K13413%09green/K13418%09green/K13456%09green/K13457%09green/K13458%09green/K13459%09green/K13430%09green/K13436%09green/K13434%09green/K02183%09green/K13449%09green/K04079%09green/K05391%09green/K00864%09green/K13429%09green/K04368%09green/K18875%09green/K…
map05225	Human Diseases	Cancers: Specific types	Hepatocellular carcinoma	187	TRINITY_DN82364_c0_g1;TRINITY_DN13950_c0_g1;TRINITY_DN13950_c0_g2;TRINITY_DN93994_c0_g1;TRINITY_DN32826_c0_g1;TRINITY_DN50939_c0_g1;TRINITY_DN94834_c0_g1;TRINITY_DN174_c0_g1;TRINITY_DN145_c0_g1;TRINITY_DN83982_c1_g1;TRINITY_DN83982_c0_g1;TRINITY_DN67113_c0_g1;TRINITY_DN85870_c0_g3;TRINITY_DN13115_c0_g1;TRINITY_DN65790_c0_g1;TRINITY_DN65790_c0_g2;TRINITY_DN39799_c0_g1;TRINITY_DN39799_c0_g2;TRINITY…	map05225.png	http://www.genome.jp/dbget-bin/show_pathway?map05225/K01110%09green/K03083%09green/K11340%09green/K11126%09green/K04371%09green/K03511%09green/K09389%09green/K10140%09green/K04503%09green/K11650%09green/K05692%09green/K04688%09green/K04464%09green/K12876%09green/K07203%09green/K11647%09green/K04368%09green/K00799%09green/K10355%09green/K11648%09green/K06620%09green/K11649%09green/K11723%09green
map05226	Human Diseases	Cancers: Specific types	Gastric cancer	135	TRINITY_DN13950_c0_g1;TRINITY_DN13950_c0_g2;TRINITY_DN13919_c0_g1;TRINITY_DN62124_c0_g1;TRINITY_DN13115_c0_g1;TRINITY_DN48076_c0_g1;TRINITY_DN38009_c0_g1;TRINITY_DN42555_c0_g1;TRINITY_DN15792_c0_g1;TRINITY_DN17327_c0_g1;TRINITY_DN43887_c0_g1;TRINITY_DN77300_c0_g2;TRINITY_DN77300_c0_g3;TRINITY_DN36531_c0_g1;TRINITY_DN11777_c0_g1;TRINITY_DN49869_c0_g1;TRINITY_DN35708_c0_g1;TRINITY_DN35708_c0_g2;TRI…	map05226.png	http://www.genome.jp/dbget-bin/show_pathway?map05226/K08734%09green/K09389%09green/K10140%09green/K03511%09green/K03083%09green/K07203%09green/K04688%09green/K04464%09green/K03006%09green/K04368%09green/K05658%09green/K04371%09green/K02206%09green/K11126%09green/K06620%09green/K04503%09green
map04933	Human Diseases	Endocrine and metabolic diseases	AGE-RAGE signaling pathway in diabetic complications	61	TRINITY_DN88037_c0_g3;TRINITY_DN72024_c2_g1;TRINITY_DN3220_c0_g1;TRINITY_DN3220_c0_g2;TRINITY_DN78933_c0_g1;TRINITY_DN18634_c0_g1;TRINITY_DN85599_c0_g1;TRINITY_DN589_c0_g1;TRINITY_DN589_c0_g2;TRINITY_DN83272_c0_g1;TRINITY_DN33838_c0_g1;TRINITY_DN64407_c1_g1;TRINITY_DN64407_c2_g1;TRINITY_DN64407_c0_g1;TRINITY_DN35708_c0_g1;TRINITY_DN35708_c0_g2;TRINITY_DN5027_c0_g2;TRINITY_DN61184_c1_g1;TRINITY_DN…	map04933.png	http://www.genome.jp/dbget-bin/show_pathway?map04933/K04503%09green/K04464%09green/K05860%09green/K05857%09green/K19720%09green/K04392%09green/K04371%09green/K06236%09green/K10030%09green
map04934	Human Diseases	Endocrine and metabolic diseases	Cushing syndrome	68	TRINITY_DN13925_c3_g1;TRINITY_DN9283_c0_g1;TRINITY_DN23277_c0_g1;TRINITY_DN38009_c0_g1;TRINITY_DN38724_c0_g1;TRINITY_DN89591_c0_g2;TRINITY_DN106915_c0_g1;TRINITY_DN106429_c0_g1;TRINITY_DN11791_c0_g1;TRINITY_DN64403_c0_g1;TRINITY_DN49869_c0_g1;TRINITY_DN35708_c0_g1;TRINITY_DN35708_c0_g2;TRINITY_DN21114_c0_g1;TRINITY_DN61222_c0_g1;TRINITY_DN6241_c0_g1;TRINITY_DN20304_c0_g1;TRINITY_DN87552_c0_g1;TRI…	map04934.png	http://www.genome.jp/dbget-bin/show_pathway?map04934/K04515%09green/K09389%09green/K04503%09green/K14964%09green/K01679%09green/K14961%09green/K04464%09green/K14963%09green/K03083%09green/K04368%09green/K04374%09green/K07418%09green/K04371%09green/K02206%09green/K04632%09green/K00512%09green/K06620%09green
map05163	Human Diseases	Infectious diseases: Viral	Human cytomegalovirus infection	136	TRINITY_DN16642_c1_g1;TRINITY_DN16642_c0_g1;TRINITY_DN88037_c0_g3;TRINITY_DN3220_c0_g1;TRINITY_DN3220_c0_g2;TRINITY_DN78933_c0_g1;TRINITY_DN64752_c0_g2;TRINITY_DN64752_c0_g3;TRINITY_DN17327_c0_g1;TRINITY_DN66042_c0_g1;TRINITY_DN66042_c0_g2;TRINITY_DN104158_c0_g1;TRINITY_DN102843_c0_g1;TRINITY_DN106429_c0_g1;TRINITY_DN36531_c0_g1;TRINITY_DN33838_c0_g1;TRINITY_DN11777_c0_g1;TRINITY_DN11739_c0_g1;TR…	map05163.png	http://www.genome.jp/dbget-bin/show_pathway?map05163/K04536%09green/K03083%09green/K04392%09green/K10030%09green/K06751%09green/K08738%09green/K04371%09green/K04374%09green/K02183%09green/K09389%09green/K04503%09green/K04688%09green/K04464%09green/K08055%09green/K08056%09green/K08057%09green/K07203%09green/K07205%09green/K06268%09green/K04368%09green/K04632%09green/K06620%09green
map05167	Human Diseases	Infectious diseases: Viral	Kaposi sarcoma-associated herpesvirus infection	144	TRINITY_DN16631_c0_g1;TRINITY_DN16642_c1_g1;TRINITY_DN16642_c0_g1;TRINITY_DN88037_c0_g3;TRINITY_DN3220_c0_g1;TRINITY_DN3220_c0_g2;TRINITY_DN78933_c0_g1;TRINITY_DN139_c0_g1;TRINITY_DN86615_c0_g1;TRINITY_DN40149_c0_g1;TRINITY_DN4463_c0_g1;TRINITY_DN4463_c0_g2;TRINITY_DN43837_c0_g1;TRINITY_DN36531_c0_g1;TRINITY_DN33838_c0_g1;TRINITY_DN11777_c0_g1;TRINITY_DN11739_c0_g1;TRINITY_DN34138_c0_g1;TRINITY_D…	map05167.png	http://www.genome.jp/dbget-bin/show_pathway?map05167/K04551%09green/K04536%09green/K03083%09green/K00914%09green/K04392%09green/K10030%09green/K06751%09green/K08770%09green/K08738%09green/K08341%09green/K08343%09green/K04371%09green/K02977%09green/K05505%09green/K06268%09green/K02183%09green/K09389%09green/K04503%09green/K04464%09green/K02927%09green/K07203%09green/K08334%09green/K04498%09green/K…
map05165	Human Diseases	Infectious diseases: Viral	Human papillomavirus infection	364	TRINITY_DN8201_c0_g1;TRINITY_DN8201_c0_g2;TRINITY_DN36597_c0_g1;TRINITY_DN13950_c0_g1;TRINITY_DN13950_c0_g2;TRINITY_DN92928_c0_g1;TRINITY_DN79540_c0_g2;TRINITY_DN37731_c0_g1;TRINITY_DN49093_c0_g4;TRINITY_DN49093_c0_g3;TRINITY_DN50939_c0_g1;TRINITY_DN63474_c0_g1;TRINITY_DN56963_c1_g5;TRINITY_DN28848_c0_g1;TRINITY_DN103_c1_g2;TRINITY_DN103_c1_g1;TRINITY_DN139_c0_g1;TRINITY_DN180_c0_g1;TRINITY_DN180…	map05165.png	http://www.genome.jp/dbget-bin/show_pathway?map05165/K11418%09green/K06640%09green/K03062%09green/K01110%09green/K03083%09green/K16857%09green/K04505%09green/K03120%09green/K02149%09green/K00873%09green/K02155%09green/K02154%09green/K11126%09green/K02152%09green/K02151%09green/K02150%09green/K06751%09green/K05719%09green/K04354%09green/K02153%09green/K04368%09green/K14009%09green/K04371%09green/K…
map01502	Human Diseases	Drug resistance: Antimicrobial	Vancomycin resistance	1	TRINITY_DN2300_c0_g1	map01502.png	http://www.genome.jp/dbget-bin/show_pathway?map01502/K01000%09green
