# Supplementary material for: Comparative transcriptome analysis of Lupinus polyphyllus Lindl. provides a rich molecular resource for research on coloration mechanism
Source: PeerJ. 2022 Aug 2;10:e13836. doi: 10.7717/peerj.13836 (PMC9354738; doi:10.7717/peerj.13836)
Supplement: Supplemental Information 5 — The expression and functional annotation information of 6700 significant DEGs. [file peerj-10-13836-s005.xlsx]

## Sheet: Sheet1
Supplementary Table 4 Differentially expressed genes (DEGs). The expression and functional annotation information of 6700 significant DEGs.
gene_id		PIK	PKW	PUL	PWH	PYH	RED	WHT	YEL	nr_description	cog_description	swissprot	pfam
TRINITY_DN10001_c0_g1		22	4.14	54.96	20.9733	6.8567	13.23	3.32	6.2967	PREDICTED: aspartyl protease family protein At5g10770-like, partial [Lupinus angustifolius]	ENOG410XNV7(aspartic)	sp|Q8S9J6|ASPA_ARATH(Aspartyl protease family protein At5g10770 OS=Arabidopsis thaliana OX=3702 GN=At5g10770 PE=2 SV=1)	PF14543(TAXi_N:Xylanase inhibitor N-terminal)
TRINITY_DN10004_c0_g1		96.9567	44.37	20.6867	65.8633	52.2933	50.9733	110.943	45.3633	PREDICTED: ribonuclease H2 subunit A-like [Lupinus angustifolius]	COG0164(Endonuclease that specifically degrades the RNA of RNA- DNA hybrids (By similarity))	sp|Q9SEZ6|RNH2A_ARATH(Ribonuclease H2 subunit A OS=Arabidopsis thaliana OX=3702 GN=At2g25100 PE=2 SV=2)	PF01351(RNase_HII:Ribonuclease HII)
TRINITY_DN10015_c0_g1		7.0867	9.5333	18.7567	5.8267	11.2833	25.84	12.9567	18.76	PREDICTED: E3 ubiquitin-protein ligase At1g12760-like isoform X1 [Lupinus angustifolius] >XP_019456042.1 PREDICTED: E3 ubiquitin-protein ligase At1g12760-like isoform X1 [Lupinus angustifolius] >XP_019456043.1 PREDICTED: E3 ubiquitin-protein ligase At1g12760-like isoform X1 [Lupinus angustifolius] >XP_019456044.1 PREDICTED: E3 ubiquitin-protein ligase At1g12760-like isoform X1 [Lupinus angustifol…	ENOG41121N2(zinc ion binding)	sp|Q8LDB8|RING2_ARATH(E3 ubiquitin-protein ligase At1g63170 OS=Arabidopsis thaliana OX=3702 GN=At1g63170 PE=2 SV=2)
TRINITY_DN100237_c0_g1		42.8833	42.75	64.3033	77.3233	7.6167	8.5033	9.3733	15.1267	PREDICTED: 60S ribosomal protein L12-like [Lupinus angustifolius] >OIW03926.1 hypothetical protein TanjilG_30202 [Lupinus angustifolius]	COG0080(This protein binds directly to 23S ribosomal RNA (By similarity))	sp|P50883|RL121_ARATH(60S ribosomal protein L12-1 OS=Arabidopsis thaliana OX=3702 GN=RPL12A PE=2 SV=2)	PF00298(Ribosomal_L11:Ribosomal protein L11, RNA binding domain)
TRINITY_DN10026_c0_g1		12.2967	29.0333	73.4167	53.93	37.9033	22.4933	31.35	48.29	PREDICTED: granule-bound starch synthase 1, chloroplastic/amyloplastic-like [Lupinus angustifolius] >XP_019422044.1 PREDICTED: granule-bound starch synthase 1, chloroplastic/amyloplastic-like [Lupinus angustifolius] >OIV93873.1 hypothetical protein TanjilG_05576 [Lupinus angustifolius]	COG0297(starch synthase activity)	sp|O82627|SSG1_ANTMA(Granule-bound starch synthase 1, chloroplastic/amyloplastic OS=Antirrhinum majus OX=4151 GN=WAXY PE=2 SV=1)	PF08323(Glyco_transf_5:Starch synthase catalytic domain); PF00534(Glycos_transf_1:Glycosyl transferases group 1); PF13692(Glyco_trans_1_4:Glycosyl transferases group 1)
TRINITY_DN10031_c0_g1		1.71	0.27	1.4733	2.41	0.64	0.1867	0	1.1967
TRINITY_DN10033_c0_g2		1.5167	4.85	0.4967	1.0167	2.3433	0.9967	5.1667	2.72	PREDICTED: monothiol glutaredoxin-S11-like [Lupinus angustifolius] >OIV91297.1 hypothetical protein TanjilG_01828 [Lupinus angustifolius]	COG0695(Glutaredoxin)	sp|Q9M9Y9|GRS11_ARATH(Monothiol glutaredoxin-S11 OS=Arabidopsis thaliana OX=3702 GN=GRXS11 PE=3 SV=1)	PF00462(Glutaredoxin:Glutaredoxin)
TRINITY_DN100350_c0_g1		13096.8	6890.03	5368.99	7886.09	3530.77	6254.91	8219.01	2532.28	PREDICTED: thiosulfate sulfurtransferase 18 [Lupinus angustifolius] >OIW09638.1 hypothetical protein TanjilG_28237 [Lupinus angustifolius]	COG0607(Rhodanese domain protein)	sp|Q9FKW8|STR18_ARATH(Thiosulfate sulfurtransferase 18 OS=Arabidopsis thaliana OX=3702 GN=STR18 PE=1 SV=1)
TRINITY_DN100375_c0_g1		1.0767	2.9533	0.2533	0.92	0.89	1.0933	0.3667	0.0167
TRINITY_DN10039_c0_g1		0.3633	61.44	14.2467	90.95	9.4033	5.3567	17.0933	48.9667	PREDICTED: uncharacterized protein LOC109352643 [Lupinus angustifolius] >OIW07851.1 hypothetical protein TanjilG_19952 [Lupinus angustifolius]
TRINITY_DN1003_c0_g1		24.0367	9.4133	2.97	9.3267	12.1233	7.4333	16.7367	7.14	PREDICTED: probable xyloglucan glycosyltransferase 12 [Lupinus angustifolius] >OIW14923.1 hypothetical protein TanjilG_30642 [Lupinus angustifolius]	COG1215(Glycosyl transferase, family 2)	sp|Q9ZQB9|CSLCC_ARATH(Probable xyloglucan glycosyltransferase 12 OS=Arabidopsis thaliana OX=3702 GN=CSLC12 PE=1 SV=1)	PF00535(Glycos_transf_2:Glycosyl transferase family 2); PF13641(Glyco_tranf_2_3:Glycosyltransferase like family 2)
TRINITY_DN10050_c0_g1		8.9767	2.3833	0.52	3.4767	4.1633	2.19	5.96	1.47	PREDICTED: U-box domain-containing protein 34-like isoform X1 [Lupinus angustifolius]	COG0515(Serine Threonine protein kinase)	sp|Q8S8S7|PUB34_ARATH(U-box domain-containing protein 34 OS=Arabidopsis thaliana OX=3702 GN=PUB34 PE=3 SV=1)	PF07714(Pkinase_Tyr:Protein tyrosine kinase); PF00069(Pkinase:Protein kinase domain); PF00582(Usp:Universal stress protein family)
TRINITY_DN10051_c0_g1		23.8267	14.5667	8.8967	15.6833	0	4.4867	4.1367	14.5067	PREDICTED: uncharacterized protein LOC109354533 isoform X1 [Lupinus angustifolius] >XP_019452664.1 PREDICTED: uncharacterized protein LOC109354533 isoform X1 [Lupinus angustifolius] >XP_019452665.1 PREDICTED: uncharacterized protein LOC109354533 isoform X1 [Lupinus angustifolius] >OIW06754.1 hypothetical protein TanjilG_11479 [Lupinus angustifolius]	ENOG41120F4(-)
TRINITY_DN100564_c0_g1		1.2533	0.2633	0.0333	0.2333	0.3333	0.3	1.08	0.1633	PREDICTED: E3 ubiquitin-protein ligase ATL6-like [Lupinus angustifolius] >OIW13557.1 hypothetical protein TanjilG_29298 [Lupinus angustifolius]	ENOG41121N2(zinc ion binding)	sp|Q8RXX9|ATL6_ARATH(E3 ubiquitin-protein ligase ATL6 OS=Arabidopsis thaliana OX=3702 GN=ATL6 PE=1 SV=2)	PF13639(zf-RING_2:Ring finger domain); PF17123(zf-RING_11:RING-like zinc finger); PF12678(zf-rbx1:RING-H2 zinc finger domain); PF13923(zf-C3HC4_2:Zinc finger, C3HC4 type (RING finger)); PF00097(zf-C3HC4:Zinc finger, C3HC4 type (RING finger)); PF12861(zf-ANAPC11:Anaphase-promoting complex subunit 11 RING-H2 finger); PF14634(zf-RING_5:zinc-RING finger domain); PF13445(zf-RING_UBOX:RING-type zinc-fi…
TRINITY_DN10056_c0_g3		0.2033	1.39	0.57	0.0267	0	0	0.4933	0.48	PREDICTED: uncharacterized protein LOC109352947 [Lupinus angustifolius]
TRINITY_DN10064_c0_g1		6.0133	0.46	0.07	0.29	0.3767	0.1967	8.85	0.4533	PREDICTED: uncharacterized protein LOC109353634 isoform X2 [Lupinus angustifolius]	COG3693(hydrolase family 10)	sp|A0A1P8B8F8|XYN5_ARATH(Endo-1,4-beta-xylanase 5 OS=Arabidopsis thaliana OX=3702 GN=XYN5 PE=3 SV=1)	PF00331(Glyco_hydro_10:Glycosyl hydrolase family 10); PF02018(CBM_4_9:Carbohydrate binding domain)
TRINITY_DN100709_c0_g1		4.5233	9.9367	17.58	6.24	8.1733	0	3.1467	0.95
TRINITY_DN10073_c0_g1		3.27	6.6767	21.5567	12.52	5.35	20.7633	5.6267	10.2867	PREDICTED: LOW QUALITY PROTEIN: pentatricopeptide repeat-containing protein At1g19720-like [Lupinus angustifolius]	ENOG410Z7Z7(Pentatricopeptide repeat-containing protein); ENOG4111KSN(jacalin lectin family protein)	sp|F4HQX1|JAL3_ARATH(Jacalin-related lectin 3 OS=Arabidopsis thaliana OX=3702 GN=JAL3 PE=2 SV=1)	PF01419(Jacalin:Jacalin-like lectin domain)
TRINITY_DN100832_c0_g1		10.2667	6.57	0	17.2867	17.9567	12.5733	18.7367	5.0533	actin-97 [Vigna unguiculata] >XP_027913283.1 actin-97 [Vigna unguiculata] >XP_027913291.1 actin-97 [Vigna unguiculata] >QCD97519.1 actin beta/gamma 1 [Vigna unguiculata]	COG5277(Transcription factor)	sp|P53497|ACT12_ARATH(Actin-12 OS=Arabidopsis thaliana OX=3702 GN=ACT12 PE=1 SV=1)	PF00022(Actin:Actin)
TRINITY_DN100836_c0_g1		43.69	908.543	142.913	47.64	2400.55	211.357	874.887	141.577	PREDICTED: probable terpene synthase 2 isoform X1 [Lupinus angustifolius] >OIW15246.1 hypothetical protein TanjilG_17566 [Lupinus angustifolius]	ENOG410YBXH(synthase)	sp|B9SCB6|TPS2_RICCO(Probable terpene synthase 2 OS=Ricinus communis OX=3988 GN=TPS2 PE=3 SV=1)	PF03936(Terpene_synth_C:Terpene synthase family, metal binding domain)
TRINITY_DN10084_c0_g1		2.14	8.1367	21.9267	14.65	6.6233	8.7133	12.53	12.16	PREDICTED: CASP-like protein 1E1 [Lupinus angustifolius] >OIV95392.1 hypothetical protein TanjilG_06261 [Lupinus angustifolius]	ENOG410YQ35(CASP-like protein)	sp|A7PTY8|CSPL8_VITVI(CASP-like protein 1E1 OS=Vitis vinifera OX=29760 GN=VIT_07s0104g01350 PE=2 SV=1)	PF04535(DUF588:Domain of unknown function (DUF588))
TRINITY_DN10085_c0_g1		4.41	9.8	1.5733	10.0867	1.0867	8.6967	12.13	3.9467	PREDICTED: uncharacterized protein LOC109350589 [Lupinus angustifolius]			PF14111(DUF4283:Domain of unknown function (DUF4283)); PF14392(zf-CCHC_4:Zinc knuckle)
TRINITY_DN100872_c0_g2		1.0067	0.0567	0.0967	0.9067	1.88	0	0	0.7233	PREDICTED: formin-like protein 20 [Lupinus angustifolius]	ENOG410XQR0(Kinesin family member); ENOG410ZXC5(FH2)	sp|Q9FLQ7|FH20_ARATH(Formin-like protein 20 OS=Arabidopsis thaliana OX=3702 GN=FH20 PE=2 SV=3)	PF02181(FH2:Formin Homology 2 Domain)
TRINITY_DN10090_c1_g2		0.1633	1.0533	0.4033	0.6533	0.57	0	0.68	0.6467
TRINITY_DN100_c0_g1		15.5133	14.0567	13.2067	8.51	13.0433	11.7333	41.28	27.68	PREDICTED: 1-acylglycerol-3-phosphate O-acyltransferase [Lupinus angustifolius] >OIV96318.1 hypothetical protein TanjilG_09745 [Lupinus angustifolius]	COG0596(Alpha beta hydrolase)	sp|O22975|LPAAT_ARATH(1-acylglycerol-3-phosphate O-acyltransferase OS=Arabidopsis thaliana OX=3702 GN=At4g24160 PE=1 SV=1)	PF00561(Abhydrolase_1:alpha/beta hydrolase fold); PF12146(Hydrolase_4:Serine aminopeptidase, S33); PF03096(Ndr:Ndr family); PF12697(Abhydrolase_6:Alpha/beta hydrolase family); PF06259(Abhydrolase_8:Alpha/beta hydrolase); PF00756(Esterase:Putative esterase); PF12695(Abhydrolase_5:Alpha/beta hydrolase family)
TRINITY_DN100_c0_g2		5.13	4.8967	2.77	2.5067	4.74	2.08	12.0167	8.1767	PREDICTED: 1-acylglycerol-3-phosphate O-acyltransferase [Lupinus angustifolius] >OIV96318.1 hypothetical protein TanjilG_09745 [Lupinus angustifolius]	COG0596(Alpha beta hydrolase)	sp|Q0J0A4|LPAAT_ORYSJ(Probable 1-acylglycerol-3-phosphate O-acyltransferase OS=Oryza sativa subsp. japonica OX=39947 GN=Os09g0520200 PE=3 SV=3)
TRINITY_DN10104_c0_g1		0	1.3567	6.1533	3.63	0.4667	2.3033	2.57	1.0767
TRINITY_DN10111_c0_g1		1.3767	3.0567	0.12	0.0567	1.1367	0	1.0367	1.2633
TRINITY_DN10117_c0_g1		4.13	0.64	0.1433	0.7767	0.9767	0.58	3.7167	0.6967	PREDICTED: phosphatidylinositol 4-phosphate 5-kinase 5-like [Lupinus angustifolius] >XP_019429715.1 PREDICTED: phosphatidylinositol 4-phosphate 5-kinase 5-like [Lupinus angustifolius] >XP_019429717.1 PREDICTED: phosphatidylinositol 4-phosphate 5-kinase 5-like [Lupinus angustifolius] >OIW19185.1 hypothetical protein TanjilG_16829 [Lupinus angustifolius]	COG5253(phosphatidylinositol-4-phosphate 5-kinase)	sp|Q9SLG9|PI5K5_ARATH(Phosphatidylinositol 4-phosphate 5-kinase 5 OS=Arabidopsis thaliana OX=3702 GN=PIP5K5 PE=2 SV=1)	PF01504(PIP5K:Phosphatidylinositol-4-phosphate 5-Kinase); PF02493(MORN:MORN repeat)
TRINITY_DN101218_c0_g1		1.32	0.0433	0.0367	0.1333	0.2567	0	1.0433	0.0433	PREDICTED: berberine bridge enzyme-like 21 [Lupinus angustifolius] >OIV95979.1 hypothetical protein TanjilG_27083 [Lupinus angustifolius]	COG0277(FAD linked oxidase domain protein)	sp|Q9SVG3|BBE21_ARATH(Berberine bridge enzyme-like 21 OS=Arabidopsis thaliana OX=3702 GN=At4g20840 PE=2 SV=1)	PF01565(FAD_binding_4:FAD binding domain)
TRINITY_DN1012_c0_g1		73.4667	30.5067	13.3067	32.1333	42.6933	26.7667	60.31	22.29	PREDICTED: dual specificity protein kinase shkC-like isoform X1 [Lupinus angustifolius] >XP_019464417.1 PREDICTED: dual specificity protein kinase shkC-like isoform X1 [Lupinus angustifolius]	COG0515(Serine Threonine protein kinase)	sp|F4IS56|ILK1_ARATH(Integrin-linked protein kinase 1 OS=Arabidopsis thaliana OX=3702 GN=ILK1 PE=1 SV=1)	PF07714(Pkinase_Tyr:Protein tyrosine kinase); PF00069(Pkinase:Protein kinase domain); PF12796(Ank_2:Ankyrin repeats (3 copies)); PF13637(Ank_4:Ankyrin repeats (many copies)); PF13857(Ank_5:Ankyrin repeats (many copies)); PF00023(Ank:Ankyrin repeat); PF13606(Ank_3:Ankyrin repeat)
TRINITY_DN10137_c0_g1		83.98	22.2533	5.8567	34.2933	45.85	20.6267	76.6033	16.14	PREDICTED: guanine nucleotide-binding protein subunit beta-like protein [Lupinus angustifolius] >OIW03450.1 hypothetical protein TanjilG_14675 [Lupinus angustifolius]	ENOG410XP1Z(wD repeat domain)	sp|O48716|JGB_ARATH(Protein JINGUBANG OS=Arabidopsis thaliana OX=3702 GN=JGB PE=1 SV=1)	PF00400(WD40:WD domain, G-beta repeat)
TRINITY_DN10138_c0_g1		0.8967	2.8467	3.15	4.2133	2.34	4.51	2.6833	2.18	PREDICTED: uncharacterized protein LOC109333418 isoform X1 [Lupinus angustifolius]	ENOG411298C(-)
TRINITY_DN101419_c0_g1		284.24	761.933	1752.31	1238.76	1279.88	1027.58	790.147	999.02	PREDICTED: (-	ENOG410YBXH(synthase)	sp|Q6Q3H3|TPSGD_VITVI((-)-germacrene D synthase OS=Vitis vinifera OX=29760 GN=VIT_19s0014g04930 PE=1 SV=1)
TRINITY_DN10142_c0_g1		0.8167	2.7033	2.01	1.25	0.5233	5.2467	5.6333	2.3733	PREDICTED: vacuolar iron transporter homolog 4-like [Lupinus angustifolius] >OIW13180.1 hypothetical protein TanjilG_17536 [Lupinus angustifolius]	COG1814(integral membrane protein)	sp|Q9M2C0|VITH4_ARATH(Vacuolar iron transporter homolog 4 OS=Arabidopsis thaliana OX=3702 GN=At3g43660 PE=2 SV=1)	PF01988(VIT1:VIT family)
TRINITY_DN101449_c0_g1		4.2567	1.4833	0.07	1.04	1.0667	0.38	2.94	1.47
TRINITY_DN10155_c0_g1		90.01	68.8333	33.2133	135.757	82.58	5.8833	42.4133	112.203	PREDICTED: thaumatin-like protein 1b [Lupinus angustifolius]	ENOG410ZJVY(THN)	sp|Q9FSG7|TP1A_MALDO(Thaumatin-like protein 1a OS=Malus domestica OX=3750 GN=TL1 PE=1 SV=1)	PF00314(Thaumatin:Thaumatin family); PF16483(Glyco_hydro_64:Beta-1,3-glucanase)
TRINITY_DN101575_c0_g1		28.5833	16.6167	97.3967	40.5	0.0833	22.1467	19.13	16.6133	PREDICTED: calcyclin-binding protein-like [Lupinus angustifolius] >OIW10221.1 hypothetical protein TanjilG_27972 [Lupinus angustifolius]	ENOG410XSB6(calcyclin binding protein)		PF09032(Siah-Interact_N:Siah interacting protein, N terminal)
TRINITY_DN10160_c0_g2		0	0	17.4333	0	0	0	0	0	PREDICTED: calcium-transporting ATPase 1, endoplasmic reticulum-type-like [Lupinus angustifolius] >OIW11219.1 hypothetical protein TanjilG_28310 [Lupinus angustifolius]	COG0474(P-type atpase)	sp|Q9XES1|ECA4_ARATH(Calcium-transporting ATPase 4, endoplasmic reticulum-type OS=Arabidopsis thaliana OX=3702 GN=ECA4 PE=2 SV=2)	PF13246(Cation_ATPase:Cation transport ATPase (P-type))
TRINITY_DN10162_c0_g1		0.2433	1.0433	2.25	0.4633	0.2033	0.25	1.4267	0.5533	hypothetical protein TanjilG_23536 [Lupinus angustifolius]	COG0705(rhomboid family)	sp|Q0WQX7|RBL1_ARATH(RHOMBOID-like protein 1 OS=Arabidopsis thaliana OX=3702 GN=RBL1 PE=2 SV=1)	PF01694(Rhomboid:Rhomboid family)
TRINITY_DN101722_c0_g2		3.5867	1.51	3.6	0.62	4.3067	2.0767	0	8.7033	PREDICTED: cyclin-T1-5-like [Lupinus angustifolius] >XP_019426083.1 PREDICTED: cyclin-T1-5-like [Lupinus angustifolius] >OIV92507.1 hypothetical protein TanjilG_02270 [Lupinus angustifolius]	COG5333(Component of the Mediator complex, a coactivator involved in regulated gene transcription of nearly all RNA polymerase II-dependent genes. Mediator functions as a bridge to convey information from gene-specific regulatory proteins to the basal RNA polymerase II transcription machinery. Mediator is recruited to promoters by direct interactions with regulatory proteins and serves as a scaff…	sp|Q2RAC5|CCT13_ORYSJ(Cyclin-T1-3 OS=Oryza sativa subsp. japonica OX=39947 GN=CYCT1-3 PE=3 SV=2)
TRINITY_DN101745_c1_g1		0.2867	2.01	7.89	5.3633	1.48	4.8867	3.0833	2.66	PREDICTED: 14 kDa proline-rich protein DC2.15-like isoform X2 [Lupinus angustifolius]	ENOG410YRRT(14 kDa proline-rich protein)	sp|P14009|14KD_DAUCA(14 kDa proline-rich protein DC2.15 OS=Daucus carota OX=4039 PE=2 SV=1)	PF14547(Hydrophob_seed:Hydrophobic seed protein); PF00234(Tryp_alpha_amyl:Protease inhibitor/seed storage/LTP family)
TRINITY_DN101760_c0_g2		0	26.4133	6.2633	15.2233	10.4867	28.1033	15.5	0
TRINITY_DN1017_c0_g2		2.69	3.6367	6.1167	12.8567	6.22	7.3267	5.7433	3.39	PREDICTED: leucine-rich repeat receptor-like serine/threonine/tyrosine-protein kinase SOBIR1 [Lupinus angustifolius] >XP_019433524.1 PREDICTED: leucine-rich repeat receptor-like serine/threonine/tyrosine-protein kinase SOBIR1 [Lupinus angustifolius]	COG0515(Serine Threonine protein kinase)	sp|Q9SKB2|SBIR1_ARATH(Leucine-rich repeat receptor-like serine/threonine/tyrosine-protein kinase SOBIR1 OS=Arabidopsis thaliana OX=3702 GN=SOBIR1 PE=1 SV=1)	PF00069(Pkinase:Protein kinase domain); PF07714(Pkinase_Tyr:Protein tyrosine kinase); PF13855(LRR_8:Leucine rich repeat); PF12799(LRR_4:Leucine Rich repeats (2 copies)); PF01636(APH:Phosphotransferase enzyme family)
TRINITY_DN10185_c0_g1		15.17	5.7433	1.5567	6.68	7.9733	5.04	12.9933	4.8967	PREDICTED: protein IQ-DOMAIN 1-like isoform X2 [Lupinus angustifolius]	ENOG4111IYP(IQ-domain)	sp|Q9SF32|IQD1_ARATH(Protein IQ-DOMAIN 1 OS=Arabidopsis thaliana OX=3702 GN=IQD1 PE=1 SV=1)	PF00612(IQ:IQ calmodulin-binding motif)
TRINITY_DN10189_c0_g1		128.223	25.91	268.313	75.1633	31.3667	21.48	27.63	67.24	hypothetical protein TanjilG_29203 [Lupinus angustifolius]	ENOG410XS7T(o-methyltransferase)	sp|B0ZB57|OMT3_HUMLU(Probable O-methyltransferase 3 OS=Humulus lupulus OX=3486 GN=OMT3 PE=2 SV=1)	PF00891(Methyltransf_2:O-methyltransferase domain)
TRINITY_DN1018_c0_g3		4.7933	13.2833	2.1367	7.8433	4.5633	0.8633	22.6533	4.69			sp|Q9M2K4|BZP61_ARATH(Basic leucine zipper 61 OS=Arabidopsis thaliana OX=3702 GN=BZIP61 PE=1 SV=1)
TRINITY_DN10209_c0_g1		19.5867	9.9867	1.3133	7.0667	10.4133	5.4267	13.65	4.05	PREDICTED: phospholipase D delta-like [Lupinus angustifolius]	COG1502(Catalyzes the reversible phosphatidyl group transfer from one phosphatidylglycerol molecule to another to form cardiolipin (CL) (diphosphatidylglycerol) and glycerol (By similarity))	sp|Q9C5Y0|PLDD1_ARATH(Phospholipase D delta OS=Arabidopsis thaliana OX=3702 GN=PLDDELTA PE=1 SV=2)	PF12357(PLD_C:Phospholipase D C terminal); PF00168(C2:C2 domain); PF00614(PLDc:Phospholipase D Active site motif); PF13091(PLDc_2:PLD-like domain)
TRINITY_DN10212_c0_g1		0.9767	0.3233	0.3667	1.4233	0.3667	1.0433	0.39	1.0733	PREDICTED: uncharacterized protein LOC109329191 [Lupinus angustifolius]	ENOG410YADE(Reverse transcriptase (RNA-dependent DNA polymerase)); ENOG4111K5V(Reverse transcriptase (RNA-dependent DNA polymerase)); ENOG410Y65V(Retrotransposon protein)	sp|P08548|LIN1_NYCCO(LINE-1 reverse transcriptase homolog OS=Nycticebus coucang OX=9470 PE=4 SV=1)	PF00078(RVT_1:Reverse transcriptase (RNA-dependent DNA polymerase)); PF13966(zf-RVT:zinc-binding in reverse transcriptase)
TRINITY_DN102139_c0_g1		0	0.5833	3.0167	0.7233	0.7867	1.72	0.0367	0.0333	PREDICTED: tRNA(adenine(34	COG0590(deaminase); COG0590(deaminase)	sp|Q9S7I0|TADA_ARATH(tRNA(adenine(34)) deaminase, chloroplastic OS=Arabidopsis thaliana OX=3702 GN=TADA PE=1 SV=1)	PF00383(dCMP_cyt_deam_1:Cytidine and deoxycytidylate deaminase zinc-binding region); PF14437(MafB19-deam:MafB19-like deaminase)
TRINITY_DN10214_c0_g1		0.63	1.57	3.1433	2.5033	1.2833	2.2033	1.29	1.86	PREDICTED: peroxidase 10 isoform X2 [Lupinus angustifolius]	ENOG41118P7(peroxidase)	sp|Q9FX85|PER10_ARATH(Peroxidase 10 OS=Arabidopsis thaliana OX=3702 GN=PER10 PE=1 SV=1)	PF00141(peroxidase:Peroxidase)
TRINITY_DN10220_c0_g1		3.1367	1.39	2.7267	4.6333	1.3	7.2467	2.7533	2.75	uncharacterized protein LOC109799781 [Cajanus cajan] >KYP65145.1 hypothetical protein KK1_011374 [Cajanus cajan]	ENOG41128UX(-)
TRINITY_DN10226_c2_g1		34.16	12.2333	6.4133	17.5167	20.6333	9.6833	28.4033	7.62	PREDICTED: rop guanine nucleotide exchange factor 12-like isoform X1 [Lupinus angustifolius] >OIW03812.1 hypothetical protein TanjilG_30088 [Lupinus angustifolius]	ENOG410YG86(guanine nucleotide exchange factor)	sp|Q9LV40|ROGF8_ARATH(Rho guanine nucleotide exchange factor 8 OS=Arabidopsis thaliana OX=3702 GN=ROPGEF8 PE=1 SV=1)	PF03759(PRONE:PRONE (Plant-specific Rop nucleotide exchanger))
TRINITY_DN1022_c7_g1		14.6567	2.8233	5.7367	9.2167	13.71	3.1667	15.8533	10.8067	PREDICTED: homeobox protein knotted-1-like 7 isoform X2 [Lupinus angustifolius] >OIV94368.1 hypothetical protein TanjilG_25430 [Lupinus angustifolius]	ENOG410XPMQ(homeobox)	sp|P46606|HD1_BRANA(Homeobox protein HD1 OS=Brassica napus OX=3708 GN=HD1 PE=2 SV=1)	PF03791(KNOX2:KNOX2 domain); PF03790(KNOX1:KNOX1 domain)
TRINITY_DN10233_c0_g1		8.51	1.1633	9.6567	9.1733	7.4	18.1067	5.2033	2.84	PREDICTED: uncharacterized protein LOC109351686 isoform X1 [Lupinus angustifolius] >OIW08541.1 hypothetical protein TanjilG_03217 [Lupinus angustifolius]	ENOG410YDUZ(Protein of unknown function, DUF547)		PF04784(DUF547:Protein of unknown function, DUF547); PF14389(Lzipper-MIP1:Leucine-zipper of ternary complex factor MIP1)
TRINITY_DN102386_c0_g1		2.22	0.5033	0.58	4.33	0.3333	0.1967	1.8	3.7367	PREDICTED: nuclear pore complex protein NUP98A-like [Lupinus angustifolius] >OIW13770.1 hypothetical protein TanjilG_31659 [Lupinus angustifolius]	ENOG410XPV4(nuclear pore complex protein); ENOG411018S(Nucleoporin autopeptidase); ENOG4110027(nuclear pore complex protein)	sp|F4ID16|NU98B_ARATH(Nuclear pore complex protein NUP98B OS=Arabidopsis thaliana OX=3702 GN=NUP98B PE=1 SV=1)
TRINITY_DN10248_c0_g1		6.2333	9.34	12.09	4.5633	0.2433	1.5467	4.9133	3.91	hypothetical protein TanjilG_13229 [Lupinus angustifolius]	ENOG410XPDD(Coactivator-associated arginine methyltransferase 1)
TRINITY_DN10253_c0_g1		132.87	40.9367	6.9933	43.9033	68.09	34.3433	90.6067	21.9767	PREDICTED: skin secretory protein xP2-like isoform X1 [Lupinus angustifolius] >OIV89799.1 hypothetical protein TanjilG_30548 [Lupinus angustifolius]
TRINITY_DN10256_c0_g1		1.68	1.46	0.8633	4.3767	1.5933	11.1667	3.5033	3.2333
TRINITY_DN10256_c0_g2		0	1.3633	6.1167	1.7567	1.5433	0.8133	0	0.6633
TRINITY_DN10263_c0_g1		10.7167	5.0033	9.48	3.3433	0	0.1533	12.1567	0	PREDICTED: microtubule-associated protein futsch [Lupinus angustifolius] >XP_019457842.1 PREDICTED: microtubule-associated protein futsch [Lupinus angustifolius] >XP_019457843.1 PREDICTED: microtubule-associated protein futsch [Lupinus angustifolius] >XP_019457844.1 PREDICTED: microtubule-associated protein futsch [Lupinus angustifolius] >OIW03695.1 hypothetical protein TanjilG_30759 [Lupinus ang…	COG0264(Associates with the EF-Tu.GDP complex and induces the exchange of GDP to GTP. It remains bound to the aminoacyl-tRNA.EF- Tu.GTP complex up to the GTP hydrolysis stage on the ribosome (By similarity))
TRINITY_DN10264_c0_g1		1.55	4.83	5.79	5.4633	3.8667	3.72	10.5233	7.1767	PREDICTED: glutelin type-A 3-like [Lupinus angustifolius] >XP_019461841.1 PREDICTED: glutelin type-A 3-like [Lupinus angustifolius] >OIW17916.1 hypothetical protein TanjilG_30534 [Lupinus angustifolius]	ENOG41115JH(globulin seed storage protein 2-like)	sp|Q9ZWA9|CRU4_ARATH(12S seed storage protein CRD OS=Arabidopsis thaliana OX=3702 GN=CRD PE=1 SV=1)	PF00190(Cupin_1:Cupin); PF07883(Cupin_2:Cupin domain)
TRINITY_DN10265_c0_g1		3.47	12.9567	22.9333	16.1467	6.5433	16.16	11.62	11.21	PREDICTED: 65-kDa microtubule-associated protein 1-like [Lupinus angustifolius] >XP_019432932.1 PREDICTED: 65-kDa microtubule-associated protein 1-like [Lupinus angustifolius] >OIW21414.1 hypothetical protein TanjilG_02781 [Lupinus angustifolius] >OIW21415.1 hypothetical protein TanjilG_02782 [Lupinus angustifolius]	ENOG410YZBK(protein regulator of cytokinesis)	sp|Q9FLP0|MA651_ARATH(65-kDa microtubule-associated protein 1 OS=Arabidopsis thaliana OX=3702 GN=MAP65-1 PE=1 SV=1)	PF03999(MAP65_ASE1:Microtubule associated protein (MAP65/ASE1 family))
TRINITY_DN10267_c0_g2		21.2167	7.2633	3.18	9.51	13.6933	16.95	19.79	10.2533	hypothetical protein TanjilG_29769 [Lupinus angustifolius]	COG5035(Cell cycle control protein); COG5035(Cell cycle control protein); COG5035(Cell cycle control protein)	sp|Q9SLK2|ALIS3_ARATH(ALA-interacting subunit 3 OS=Arabidopsis thaliana OX=3702 GN=ALIS3 PE=1 SV=1)	PF03381(CDC50:LEM3 (ligand-effect modulator 3) family / CDC50 family)
TRINITY_DN10278_c0_g1		0.3567	0.0467	1.0733	1.9567	0.1733	0.05	0.4933	0.3633	ribonuclease H, partial [Trifolium pratense]	ENOG410YADE(Reverse transcriptase (RNA-dependent DNA polymerase)); ENOG4111K5V(Reverse transcriptase (RNA-dependent DNA polymerase)); ENOG410Y65V(Retrotransposon protein)	sp|P14381|YTX2_XENLA(Transposon TX1 uncharacterized 149 kDa protein OS=Xenopus laevis OX=8355 PE=4 SV=1)	PF00078(RVT_1:Reverse transcriptase (RNA-dependent DNA polymerase)); PF13966(zf-RVT:zinc-binding in reverse transcriptase)
TRINITY_DN10281_c0_g1		1.0367	2.2067	0.23	2.7167	5.5467	2.1967	1.3067	3.0733	salicylate carboxymethyltransferase-like [Arachis duranensis]	ENOG4112BHH(carboxyl methyltransferase)		PF03492(Methyltransf_7:SAM dependent carboxyl methyltransferase)
TRINITY_DN10283_c0_g1		41.1733	86.38	7.2033	82.2767	17.3533	0.3267	0.54	7.1433
TRINITY_DN10285_c0_g1		0.6333	2.2633	4.9467	2.97	0.4767	0.4867	1.9933	3.05	PREDICTED: uncharacterized protein LOC109332896 [Lupinus angustifolius]	ENOG41116TY(Plant protein 1589 of unknown function (A_thal_3526))		PF09713(A_thal_3526:Plant protein 1589 of unknown function (A_thal_3526))
TRINITY_DN10293_c0_g1		1.01	1.0733	0.9833	2.87	0.3967	0.9067	0.8967	0.78	PREDICTED: uncharacterized protein LOC109362517 [Lupinus angustifolius]	COG3733(amine oxidase)	sp|Q07121|AMO1_ARTS1(Primary amine oxidase OS=Arthrobacter sp. (strain P1) OX=47915 GN=maoI PE=1 SV=1)	PF01179(Cu_amine_oxid:Copper amine oxidase, enzyme domain); PF02728(Cu_amine_oxidN3:Copper amine oxidase, N3 domain); PF02727(Cu_amine_oxidN2:Copper amine oxidase, N2 domain)
TRINITY_DN10307_c0_g1		0.1833	1.1467	1.6867	1.82	0.6533	2.1533	0.8133	1.7667	PREDICTED: transcription factor bHLH14-like [Lupinus angustifolius] >OIW04575.1 hypothetical protein TanjilG_20931 [Lupinus angustifolius]	ENOG410Y9TK(nucleic acid binding transcription factor activity)	sp|Q39204|MYC2_ARATH(Transcription factor MYC2 OS=Arabidopsis thaliana OX=3702 GN=MYC2 PE=1 SV=2)	PF14215(bHLH-MYC_N:bHLH-MYC and R2R3-MYB transcription factors N-terminal); PF00010(HLH:Helix-loop-helix DNA-binding domain)
TRINITY_DN10308_c0_g1		6.14	21.47	24.8433	25.01	14.02	25.3933	17.2967	17.33	PREDICTED: PLASMODESMATA CALLOSE-BINDING PROTEIN 3-like isoform X1 [Lupinus angustifolius]	ENOG410YNCG(X8 domain containing protein, expressed)	sp|Q9SD84|PDCB2_ARATH(PLASMODESMATA CALLOSE-BINDING PROTEIN 2 OS=Arabidopsis thaliana OX=3702 GN=PDCB2 PE=1 SV=1)	PF07983(X8:X8 domain)
TRINITY_DN103122_c0_g1		0.0367	0.0367	0.2633	0.5067	0.18	1.3	0	0.3167
TRINITY_DN103123_c0_g1		9.51	0.2067	5.8	11.2633	9.0333	2.8267	0.08	2.5033
TRINITY_DN103149_c0_g1		0.0833	0.32	0	0.9033	0.1867	0	0.25	0.4567	PREDICTED: uncharacterized protein LOC109362039 [Lupinus angustifolius] >OIW00892.1 hypothetical protein TanjilG_20893 [Lupinus angustifolius]	ENOG410YV28(-)
TRINITY_DN10315_c0_g1		0.61	1.7067	125.913	49.3167	5.4733	14.81	2.3667	3.5267	PREDICTED: uncharacterized protein LOC109354224 [Lupinus angustifolius]	ENOG410YW7W(IQ calmodulin-binding and BAG domain containing)	sp|O65373|BAG5_ARATH(BAG family molecular chaperone regulator 5, mitochondrial OS=Arabidopsis thaliana OX=3702 GN=BAG5 PE=1 SV=1)	PF02179(BAG:BAG domain); PF00612(IQ:IQ calmodulin-binding motif)
TRINITY_DN10317_c0_g1		20.6967	6.1067	1.33	9.36	10.0733	6.0933	18.3433	4.0633	PREDICTED: uncharacterized protein LOC109337835 [Lupinus angustifolius]	COG2267(alpha beta hydrolase fold)	sp|Q9C942|CSE_ARATH(Caffeoylshikimate esterase OS=Arabidopsis thaliana OX=3702 GN=CSE PE=1 SV=1)	PF12146(Hydrolase_4:Serine aminopeptidase, S33); PF12697(Abhydrolase_6:Alpha/beta hydrolase family)
TRINITY_DN10317_c0_g2		24.2767	8.6633	1.3667	9.5	16.2833	7.9233	15.4733	5.0967	PREDICTED: uncharacterized protein LOC109337835 [Lupinus angustifolius]	COG2267(alpha beta hydrolase fold)
TRINITY_DN1031_c0_g1		6.6933	3.62	21.0433	3.92	5.19	20.9833	3.42	3.0633	unknown [Lotus japonicus]	COG1670(-acetyltransferase)	sp|P05332|YP20_BACLI(Uncharacterized N-acetyltransferase p20 OS=Bacillus licheniformis OX=1402 GN=p20 PE=4 SV=1)	PF13302(Acetyltransf_3:Acetyltransferase (GNAT) domain); PF00583(Acetyltransf_1:Acetyltransferase (GNAT) family); PF13523(Acetyltransf_8:Acetyltransferase (GNAT) domain); PF13420(Acetyltransf_4:Acetyltransferase (GNAT) domain)
TRINITY_DN103211_c0_g1		0.46	1.0633	1.4333	0	1.1767	4.4733	3.5033	0.6333	PREDICTED: basic leucine zipper 43-like [Lupinus angustifolius] >OIW21643.1 hypothetical protein TanjilG_06947 [Lupinus angustifolius]	ENOG410YWTI(Transcription factor)	sp|Q9FMC2|BZP43_ARATH(Basic leucine zipper 43 OS=Arabidopsis thaliana OX=3702 GN=BZIP43 PE=1 SV=1)	PF00170(bZIP_1:bZIP transcription factor); PF07716(bZIP_2:Basic region leucine zipper); PF03131(bZIP_Maf:bZIP Maf transcription factor); PF17078(SHE3:SWI5-dependent HO expression protein 3)
TRINITY_DN103223_c0_g1		0	0.1167	2.4733	0.06	0.1833	1.4167	0.1333	0.4
TRINITY_DN10326_c0_g1		3.74	1.8033	0.24	1.9933	2.45	1.35	3.3433	0.7167	PREDICTED: mitogen-activated protein kinase kinase kinase YODA-like isoform X2 [Lupinus angustifolius]	ENOG410XQGS(mitogen-activated protein kinase kinase kinase)	sp|Q9C5H5|M3K5G_ARATH(Mitogen-activated protein kinase kinase kinase 5 OS=Arabidopsis thaliana OX=3702 GN=MAPKKK5 PE=1 SV=1)	PF00069(Pkinase:Protein kinase domain); PF07714(Pkinase_Tyr:Protein tyrosine kinase); PF14531(Kinase-like:Kinase-like)
TRINITY_DN10326_c0_g2		4.2133	1.9	0.2967	1.9	2.25	1.1767	2.82	0.7867	hypothetical protein TanjilG_22769 [Lupinus angustifolius]
TRINITY_DN10327_c0_g1		4.7067	5.6533	1.9033	7.0033	1.6933	3.13	6.3	1.7333	PREDICTED: E3 ubiquitin-protein ligase SGR9, amyloplastic [Lupinus angustifolius] >OIV90470.1 hypothetical protein TanjilG_18654 [Lupinus angustifolius]	ENOG41121N2(zinc ion binding)	sp|Q8GXF8|SHGR9_ARATH(E3 ubiquitin-protein ligase SGR9, amyloplastic OS=Arabidopsis thaliana OX=3702 GN=SGR9 PE=1 SV=1)	PF13639(zf-RING_2:Ring finger domain); PF17123(zf-RING_11:RING-like zinc finger); PF13923(zf-C3HC4_2:Zinc finger, C3HC4 type (RING finger)); PF12678(zf-rbx1:RING-H2 zinc finger domain); PF13445(zf-RING_UBOX:RING-type zinc-finger); PF13920(zf-C3HC4_3:Zinc finger, C3HC4 type (RING finger)); PF14634(zf-RING_5:zinc-RING finger domain); PF00097(zf-C3HC4:Zinc finger, C3HC4 type (RING finger))
TRINITY_DN10329_c1_g2		0.01	0.35	0.18	0.1867	0.1667	0	0.18	0.4633
TRINITY_DN10331_c0_g1		1.0467	4.5067	0.5733	0.2067	0.9533	0.6067	0.83	1.1567
TRINITY_DN103390_c0_g1		1.6933	0.1933	0	0.24	0.4167	0.1	2.2033	0.1467	PREDICTED: uncharacterized protein LOC109335669 [Lupinus angustifolius] >XP_019427373.1 PREDICTED: uncharacterized protein LOC109335669 [Lupinus angustifolius]	ENOG41114IE(-)		PF14283(DUF4366:Domain of unknown function (DUF4366))
TRINITY_DN10348_c0_g1		0.8367	2.97	1.9	1.6267	0.3767	0.8433	0.6133	1.2633	PREDICTED: uncharacterized protein LOC109353709 [Lupinus angustifolius] >OIW06942.1 hypothetical protein TanjilG_18330 [Lupinus angustifolius]	ENOG41118E5(-)		PF07816(DUF1645:Protein of unknown function (DUF1645))
TRINITY_DN10353_c1_g1		2.95	0.6367	0.0967	0.9267	0.79	0.59	2.9033	0.39	PREDICTED: type I inositol polyphosphate 5-phosphatase 12-like isoform X2 [Lupinus angustifolius] >OIV93743.1 hypothetical protein TanjilG_16594 [Lupinus angustifolius]	COG5411(inositol)	sp|O80560|IP5PC_ARATH(Type I inositol polyphosphate 5-phosphatase 12 OS=Arabidopsis thaliana OX=3702 GN=IP5P12 PE=1 SV=2)	PF00635(Motile_Sperm:MSP (Major sperm protein) domain)
TRINITY_DN10355_c0_g1		41.46	9.8633	10.77	14.0233	14.3033	39.7633	44.0867	1.1333	PREDICTED: 20 kDa chaperonin, chloroplastic-like [Lupinus angustifolius] >OIW21737.1 hypothetical protein TanjilG_09074 [Lupinus angustifolius]	COG0234(Binds to cpn60 in the presence of Mg-ATP and suppresses the ATPase activity of the latter (By similarity))	sp|O65282|CH20_ARATH(20 kDa chaperonin, chloroplastic OS=Arabidopsis thaliana OX=3702 GN=CPN20 PE=1 SV=2)	PF00166(Cpn10:Chaperonin 10 Kd subunit)
TRINITY_DN10358_c0_g1		2.7733	2.5133	1.92	2.59	5.0933	6.9333	0.5267	4.1867	pyridoxal 5'-phosphate synthase subunit PDX1.3 [Cicer arietinum]	COG0214(Involved in the production of pyridoxal phosphate, probably by incorporating ammonia into the pyridine ring (By similarity))	sp|Q8L940|PDX13_ARATH(Pyridoxal 5'-phosphate synthase subunit PDX1.3 OS=Arabidopsis thaliana OX=3702 GN=PDX13 PE=1 SV=2)	PF01680(SOR_SNZ:SOR/SNZ family)
TRINITY_DN10361_c0_g2		0	9.4833	10.74	3.2167	3.17	0	1.7233	2.7733	light-harvesting chlorophyll-a/b binding protein Lhcb3 [Pisum sativum]	ENOG410YAI6(Chlorophyll A-B binding protein)	sp|P27489|CB23_SOLLC(Chlorophyll a-b binding protein 13, chloroplastic OS=Solanum lycopersicum OX=4081 GN=CAB13 PE=1 SV=1)	PF00504(Chloroa_b-bind:Chlorophyll A-B binding protein)
TRINITY_DN10378_c1_g1		1.1067	6.46	7.4767	7.85	1.2667	4.86	1.73	0
TRINITY_DN10381_c0_g2		43.5833	15.88	4.5067	10.1867	13.5867	15.23	27.5733	13.1633	PREDICTED: uncharacterized protein LOC109335271 [Lupinus angustifolius] >OIV90708.1 hypothetical protein TanjilG_15094 [Lupinus angustifolius]	ENOG410YI2I(Protein of unknown function (DUF1442))		PF07279(DUF1442:Protein of unknown function (DUF1442))
TRINITY_DN10381_c0_g3		10.2633	2.8467	0.2233	0.94	0.3067	0.1467	9.11	2.8567	PREDICTED: uncharacterized protein LOC109353025 [Lupinus angustifolius] >OIW07880.1 hypothetical protein TanjilG_19981 [Lupinus angustifolius]	ENOG410YI2I(Protein of unknown function (DUF1442))		PF07279(DUF1442:Protein of unknown function (DUF1442))
TRINITY_DN10387_c1_g1		18.9533	27.32	1.4933	41.2333	15.3033	27.0167	37.7067	38.7633
TRINITY_DN1038_c0_g2		6.3767	6.5067	5.0233	5.2733	5.5567	8.3433	2.1867	0	histone-lysine N-methyltransferase SUVR5 isoform X1 [Cajanus cajan] >XP_020236659.1 histone-lysine N-methyltransferase SUVR5 isoform X1 [Cajanus cajan] >XP_020236661.1 histone-lysine N-methyltransferase SUVR5 isoform X1 [Cajanus cajan] >XP_029130769.1 histone-lysine N-methyltransferase SUVR5 isoform X1 [Cajanus cajan] >XP_029130770.1 histone-lysine N-methyltransferase SUVR5 isoform X1 [Cajanus ca…	COG2940(Histone-lysine N-methyltransferase)	sp|O64827|SUVR5_ARATH(Histone-lysine N-methyltransferase SUVR5 OS=Arabidopsis thaliana OX=3702 GN=SUVR5 PE=1 SV=3)	PF00856(SET:SET domain)
TRINITY_DN10396_c0_g1		47.6267	31.7033	42.54	26.4267	203.33	14.5333	7.6333	90.2067	hypothetical protein TanjilG_27252 [Lupinus angustifolius]	COG0076(decarboxylase)	sp|Q7XHL3|TDC2_ORYSJ(Tryptophan decarboxylase 2 OS=Oryza sativa subsp. japonica OX=39947 GN=TDC2 PE=1 SV=1)	PF00282(Pyridoxal_deC:Pyridoxal-dependent decarboxylase conserved domain)
TRINITY_DN10401_c0_g1		2.6733	9.8633	23.6267	5.8733	3.4433	27.7667	7.5833	11.4533	PREDICTED: WAT1-related protein At4g08290-like [Lupinus angustifolius]	ENOG410YBPN(Auxin-induced protein)	sp|Q9SUF1|WTR31_ARATH(WAT1-related protein At4g08290 OS=Arabidopsis thaliana OX=3702 GN=At4g08290 PE=2 SV=1)	PF00892(EamA:EamA-like transporter family)
TRINITY_DN10407_c0_g1		44.8167	36.8433	36.2733	23.23	33.33	18.5667	18.5233	9.51	PREDICTED: UPF0161 protein At3g09310 isoform X1 [Lupinus angustifolius] >OIW01012.1 hypothetical protein TanjilG_14195 [Lupinus angustifolius]	COG0759(Could be involved in insertion of integral membrane proteins into the membrane (By similarity))	sp|Q9SR32|U161_ARATH(UPF0161 protein At3g09310 OS=Arabidopsis thaliana OX=3702 GN=At3g09310 PE=2 SV=2)	PF01809(YidD:Putative membrane protein insertion efficiency factor)
TRINITY_DN10410_c0_g1		0.1167	0.78	1.3233	0.9067	0.3667	0.8	0.4833	0.7233	PREDICTED: homeobox-leucine zipper protein HDG12-like [Lupinus angustifolius] >OIV89310.1 hypothetical protein TanjilG_23724 [Lupinus angustifolius]	ENOG410YFS8(Homeobox-leucine zipper protein)	sp|Q9FX31|HDG11_ARATH(Homeobox-leucine zipper protein HDG11 OS=Arabidopsis thaliana OX=3702 GN=HDG11 PE=1 SV=1)	PF00046(Homeodomain:Homeodomain); PF05920(Homeobox_KN:Homeobox KN domain); PF01852(START:START domain)
TRINITY_DN10420_c0_g2		0.95	5.0267	7.4433	6.1233	2.2767	3.8467	3.11	3.58	hypothetical protein TanjilG_05909 [Lupinus angustifolius]	ENOG410YC0Z(IQ calmodulin-binding motif family protein, expressed)		PF13178(DUF4005:Protein of unknown function (DUF4005)); PF00612(IQ:IQ calmodulin-binding motif)
TRINITY_DN104227_c0_g1		0.2467	0.7167	1.77	1.7233	0.62	0.8367	0.9367	0.62	PREDICTED: E3 ubiquitin-protein ligase ATL4-like [Lupinus angustifolius] >OIW17631.1 hypothetical protein TanjilG_28981 [Lupinus angustifolius]	ENOG41121N2(tumor protein)	sp|Q9LY41|ATL4_ARATH(E3 ubiquitin-protein ligase ATL4 OS=Arabidopsis thaliana OX=3702 GN=ATL4 PE=1 SV=1)	PF13639(zf-RING_2:Ring finger domain); PF17123(zf-RING_11:RING-like zinc finger); PF12678(zf-rbx1:RING-H2 zinc finger domain); PF13923(zf-C3HC4_2:Zinc finger, C3HC4 type (RING finger)); PF00097(zf-C3HC4:Zinc finger, C3HC4 type (RING finger)); PF13445(zf-RING_UBOX:RING-type zinc-finger); PF12861(zf-ANAPC11:Anaphase-promoting complex subunit 11 RING-H2 finger); PF14634(zf-RING_5:zinc-RING finger do…
TRINITY_DN10423_c0_g1		1.2567	2.4033	3.2133	0.7733	1.43	0.6567	1.42	1.9433	PREDICTED: uncharacterized protein DDB_G0271670-like [Lupinus angustifolius] >OIW00015.1 hypothetical protein TanjilG_26352 [Lupinus angustifolius]	ENOG410YKHT(expressed protein)
TRINITY_DN10425_c0_g1		1.42	0.0933	1.1167	2.41	1.8233	4.4267	2.2867	0.11	PREDICTED: uncharacterized protein At4g28440-like [Lupinus angustifolius] >XP_019432125.1 PREDICTED: uncharacterized protein At4g28440-like [Lupinus angustifolius] >OIW20996.1 hypothetical protein TanjilG_27341 [Lupinus angustifolius]	ENOG4111IKT(DNA-binding protein-related)	sp|O49453|Y4844_ARATH(Uncharacterized protein At4g28440 OS=Arabidopsis thaliana OX=3702 GN=At4g28440 PE=1 SV=1)
TRINITY_DN10428_c0_g1		0.7333	4.63	11.36	16.1167	0.6067	1.5	3.5733	5.61	PREDICTED: protein BASIC PENTACYSTEINE6-like [Lupinus angustifolius] >XP_019438046.1 PREDICTED: protein BASIC PENTACYSTEINE6-like [Lupinus angustifolius] >XP_019438047.1 PREDICTED: protein BASIC PENTACYSTEINE6-like [Lupinus angustifolius] >XP_019438048.1 PREDICTED: protein BASIC PENTACYSTEINE6-like [Lupinus angustifolius] >XP_019438049.1 PREDICTED: protein BASIC PENTACYSTEINE6-like [Lupinus angus…	ENOG41120EV(GAGA-binding transcriptional activator)		PF06217(GAGA_bind:GAGA binding protein-like family)
TRINITY_DN1042_c0_g1		4.5667	0.5467	0.39	1.49	1.3967	0.8467	5.1033	0.94	hypothetical protein TanjilG_09255 [Lupinus angustifolius]	ENOG410YXEE(-)	sp|Q9ZVD2|NHL13_ARATH(NDR1/HIN1-like protein 13 OS=Arabidopsis thaliana OX=3702 GN=NHL13 PE=2 SV=1)
TRINITY_DN1042_c0_g2		3.5667	0.7533	0	0.8533	1.2933	0.9233	3.8667	0.4167	hypothetical protein TanjilG_09255 [Lupinus angustifolius]	ENOG410YXEE(-)	sp|Q9ZVD2|NHL13_ARATH(NDR1/HIN1-like protein 13 OS=Arabidopsis thaliana OX=3702 GN=NHL13 PE=2 SV=1)	PF03168(LEA_2:Late embryogenesis abundant protein)
TRINITY_DN1042_c1_g1		25.2467	10.75	1.43	11.7667	14.01	9.2133	22.7667	6.3	hypothetical protein TanjilG_09255 [Lupinus angustifolius]	ENOG410YXEE(-)	sp|Q9ZVD2|NHL13_ARATH(NDR1/HIN1-like protein 13 OS=Arabidopsis thaliana OX=3702 GN=NHL13 PE=2 SV=1)
TRINITY_DN1042_c1_g2		10.55	3.1267	0.4933	3.1367	3.9467	2.05	8.21	1.32	PREDICTED: NDR1/HIN1-Like protein 3-like [Lupinus angustifolius] >OIV97898.1 hypothetical protein TanjilG_12655 [Lupinus angustifolius]	ENOG410YXEE(-)	sp|Q9ZVD2|NHL13_ARATH(NDR1/HIN1-like protein 13 OS=Arabidopsis thaliana OX=3702 GN=NHL13 PE=2 SV=1)	PF03168(LEA_2:Late embryogenesis abundant protein)
TRINITY_DN10437_c0_g3		0	0.69	6.5033	0	0.0967	0	1.1	1.5367
TRINITY_DN10438_c0_g1		3.6433	1.43	0.3133	1.45	1.78	0.7233	2.65	0.7533	PREDICTED: CSC1-like protein RXW8 [Lupinus angustifolius] >XP_019437873.1 PREDICTED: CSC1-like protein RXW8 [Lupinus angustifolius] >OIW14925.1 hypothetical protein TanjilG_30644 [Lupinus angustifolius]	COG5594(transmembrane protein 63C)	sp|F4IBD7|CSCLA_ARATH(CSC1-like protein RXW8 OS=Arabidopsis thaliana OX=3702 GN=RXW8 PE=2 SV=1)	PF02714(RSN1_7TM:Calcium-dependent channel, 7TM region, putative phosphate); PF13967(RSN1_TM:Late exocytosis, associated with Golgi transport); PF14703(PHM7_cyt:Cytosolic domain of 10TM putative phosphate transporter)
TRINITY_DN104432_c0_g1		0	0.0433	0.0733	0.0467	0.1067	0.94	0	0.3	hypothetical protein TSUD_233210 [Trifolium subterraneum]	ENOG41116Z1(-); ENOG41107V4(RNA recognition motif. (a.k.a. RRM, RBD, or RNP domain))		PF00076(RRM_1:RNA recognition motif. (a.k.a. RRM, RBD, or RNP domain)); PF14111(DUF4283:Domain of unknown function (DUF4283))
TRINITY_DN10446_c0_g1		38.48	6.04	25.25	25.5167	23.02	0.0267	14.1433	24.6833	PREDICTED: protein argonaute 1-like [Lupinus angustifolius] >OIW16076.1 hypothetical protein TanjilG_04611 [Lupinus angustifolius]	ENOG410XP07(eukaryotic translation initiation factor 2c)	sp|Q7XSA2|AGO1B_ORYSJ(Protein argonaute 1B OS=Oryza sativa subsp. japonica OX=39947 GN=AGO1B PE=2 SV=3)	PF02170(PAZ:PAZ domain); PF16488(ArgoL2:Argonaute linker 2 domain)
TRINITY_DN104482_c0_g1		0.1733	0.2467	0	18.6033	16.54	21.5733	5.5233	17.7467
TRINITY_DN10448_c0_g1		19.37	11.9133	13.2733	13.63	3.0933	8.2933	9.69	7.6533	PREDICTED: GDSL esterase/lipase At5g45960-like [Lupinus angustifolius]	COG3240(GDSL esterase lipase)	sp|Q9FJ40|GDL86_ARATH(GDSL esterase/lipase At5g45960 OS=Arabidopsis thaliana OX=3702 GN=At5g45960 PE=2 SV=1)	PF00657(Lipase_GDSL:GDSL-like Lipase/Acylhydrolase)
TRINITY_DN10463_c0_g1		1.15	0.8367	3.3067	2.3333	1.82	1.7033	3.96	4.86	PREDICTED: phospholipase D gamma 1-like isoform X1 [Lupinus angustifolius]	COG1502(Catalyzes the reversible phosphatidyl group transfer from one phosphatidylglycerol molecule to another to form cardiolipin (CL) (diphosphatidylglycerol) and glycerol (By similarity))	sp|P93733|PLDB1_ARATH(Phospholipase D beta 1 OS=Arabidopsis thaliana OX=3702 GN=PLDBETA1 PE=1 SV=4)	PF12357(PLD_C:Phospholipase D C terminal); PF00168(C2:C2 domain); PF00614(PLDc:Phospholipase D Active site motif); PF13091(PLDc_2:PLD-like domain)
TRINITY_DN104742_c0_g1		0.26	0.3233	0.6667	0.64	1.1267	0	0.14	0.2333	PREDICTED: protein YLS3-like isoform X2 [Lupinus angustifolius]	ENOG410YQE6(Lectin, galactoside-binding, soluble)		PF14368(LTP_2:Probable lipid transfer)
TRINITY_DN10478_c0_g1		3.0767	1.7533	1.7033	1.4167	2.3033	1.54	5.4933	1.8067	PREDICTED: dnaJ homolog subfamily B member 4 isoform X1 [Lupinus angustifolius] >OIV96510.1 hypothetical protein TanjilG_07902 [Lupinus angustifolius]	COG0484(ATP binding to DnaK triggers the release of the substrate protein, thus completing the reaction cycle. Several rounds of ATP-dependent interactions between DnaJ, DnaK and GrpE are required for fully efficient folding. Also involved, together with DnaK and GrpE, in the DNA replication of plasmids through activation of initiation proteins (By similarity))	sp|Q5R8J8|DNJB4_PONAB(DnaJ homolog subfamily B member 4 OS=Pongo abelii OX=9601 GN=DNAJB4 PE=2 SV=1)	PF01556(DnaJ_C:DnaJ C terminal domain); PF00226(DnaJ:DnaJ domain)
TRINITY_DN10485_c0_g1		1.05	4.2	3.8367	5.7767	2.17	4.4667	3.3633	3.28	PREDICTED: B3 domain-containing protein Os04g0386900-like [Lupinus angustifolius]		sp|Q9LHY9|Y6112_ORYSJ(B3 domain-containing protein Os06g0112300 OS=Oryza sativa subsp. japonica OX=39947 GN=Os06g0112300 PE=2 SV=1)	PF02362(B3:B3 DNA binding domain)
TRINITY_DN104882_c0_g1		0	3.3933	0.0633	0	6.8267	2.7967	0	0
TRINITY_DN10488_c0_g1		16.5167	5.0667	0.59	3.4733	3.2733	2.23	6.7867	2.1667	PREDICTED: uncharacterized protein LOC109353751 [Lupinus angustifolius] >OIW07021.1 hypothetical protein TanjilG_02655 [Lupinus angustifolius]	ENOG41105QJ(-); ENOG410ZBXK(-)		PF05553(DUF761:Cotton fibre expressed protein)
TRINITY_DN1048_c0_g1		0.88	2.7033	3.1333	2.13	1.7767	4.8867	1.6433	0.9967	uncharacterized protein LOC111994105 [Quercus suber]			PF08137(DVL:DVL family)
TRINITY_DN10493_c0_g1		1.3467	0.6933	0.9933	1.5033	1.9467	1.1733	1.1867	3.32	PREDICTED: glucose-6-phosphate/phosphate translocator 2, chloroplastic-like [Lupinus angustifolius]	ENOG410XP1S(solute carrier family 35 member)	sp|Q94B38|GPT2_ARATH(Glucose-6-phosphate/phosphate translocator 2, chloroplastic OS=Arabidopsis thaliana OX=3702 GN=GPT2 PE=2 SV=2)	PF03151(TPT:Triose-phosphate Transporter family); PF00892(EamA:EamA-like transporter family); PF08449(UAA:UAA transporter family)
TRINITY_DN10496_c1_g1		49.8033	92.6133	68.3433	87.19	294.13	101.957	135.38	95.8633
TRINITY_DN10507_c0_g1		5.2533	1.67	0.29	1.56	2.8167	1.0067	3.0133	0.6833	hypothetical protein TanjilG_30808 [Lupinus angustifolius]	ENOG410XQ8V(DUF1336 domain containing protein, expressed)	sp|Q3B724|CALS5_ARATH(Callose synthase 5 OS=Arabidopsis thaliana OX=3702 GN=CALS5 PE=1 SV=1)	PF02364(Glucan_synthase:1,3-beta-glucan synthase component)
TRINITY_DN10512_c0_g1		0.9767	2.59	7.6833	3.3733	0.93	2.43	3.3467	8.4933	PREDICTED: ethylene-responsive transcription factor ERF023-like [Lupinus angustifolius] >XP_019440452.1 PREDICTED: ethylene-responsive transcription factor ERF023-like [Lupinus angustifolius] >XP_019440453.1 PREDICTED: ethylene-responsive transcription factor ERF023-like [Lupinus angustifolius] >OIW13495.1 hypothetical protein TanjilG_29236 [Lupinus angustifolius] >OIW13496.1 hypothetical protein…	ENOG41118MR(Transcription factor)	sp|Q1ECI2|ERF23_ARATH(Ethylene-responsive transcription factor ERF023 OS=Arabidopsis thaliana OX=3702 GN=ERF023 PE=2 SV=1)	PF00847(AP2:AP2 domain)
TRINITY_DN105181_c0_g1		0.0133	0.0667	0	0.24	0	0.23	0	2.4667	hypothetical protein TanjilG_27829 [Lupinus angustifolius]	ENOG410YVZ2(Transcription factor)	sp|O80942|ZFP10_ARATH(Zinc finger protein 10 OS=Arabidopsis thaliana OX=3702 GN=ZFP10 PE=2 SV=1)	PF13912(zf-C2H2_6:C2H2-type zinc finger); PF13894(zf-C2H2_4:C2H2-type zinc finger)
TRINITY_DN10519_c0_g1		1.54	6.2333	1.9933	2.01	4.9633	3.08	2.4033	6.56
TRINITY_DN10520_c0_g2		0.48	17.4067	0.74	0.7967	0.2433	0.2	0.2533	1.6933
TRINITY_DN10521_c0_g1		0.6333	0	0.17	23.99	8.66	34.4033	15.1867	0	PREDICTED: serine hydroxymethyltransferase 4-like [Lupinus angustifolius] >OIW00576.1 hypothetical protein TanjilG_14802 [Lupinus angustifolius]	COG0112(zinc ion binding)	sp|O23254|GLYC4_ARATH(Serine hydroxymethyltransferase 4 OS=Arabidopsis thaliana OX=3702 GN=SHM4 PE=1 SV=1)	PF00464(SHMT:Serine hydroxymethyltransferase)
TRINITY_DN10529_c0_g1		16.86	13.1	4.74	8.9567	10.1067	3.8367	55.0867	12.6633	PREDICTED: uncharacterized protein LOC109347407 isoform X2 [Lupinus angustifolius]	ENOG41113F3(-)
TRINITY_DN10532_c0_g1		0.85	2.6867	4.7867	3.42	1.84	2.78	2.7467	3.7133	PREDICTED: dof zinc finger protein DOF2.1-like isoform X2 [Lupinus angustifolius]	ENOG410YM1Y(zinc finger protein); ENOG410YKK8(Zinc finger protein)	sp|O24463|PBF_MAIZE(Dof zinc finger protein PBF OS=Zea mays OX=4577 GN=PBF PE=1 SV=1)	PF02701(zf-Dof:Dof domain, zinc finger)
TRINITY_DN10533_c0_g1		3.3133	1.06	0.0733	0.68	1.02	0.41	4.8167	0.8033	PREDICTED: rho GDP-dissociation inhibitor 1-like isoform X1 [Lupinus angustifolius] >XP_019418565.1 PREDICTED: rho GDP-dissociation inhibitor 1-like isoform X2 [Lupinus angustifolius] >OIW16441.1 hypothetical protein TanjilG_19157 [Lupinus angustifolius]	ENOG4111K44(Rho GDP dissociation inhibitor (GDI))	sp|Q9SFC6|GDIR_ARATH(Rho GDP-dissociation inhibitor 1 OS=Arabidopsis thaliana OX=3702 GN=GDI1 PE=1 SV=1)	PF02115(Rho_GDI:RHO protein GDP dissociation inhibitor)
TRINITY_DN10537_c0_g1		1.6767	2.58	1.6767	2.0967	2.4633	0.48	1.51	2.4733	Ubiquitin-conjugating enzyme E2 8 [Glycine soja]	COG5078(BCL-2-associated athanogene)	sp|P35133|UBC10_ARATH(Ubiquitin-conjugating enzyme E2 10 OS=Arabidopsis thaliana OX=3702 GN=UBC10 PE=1 SV=1)	PF00179(UQ_con:Ubiquitin-conjugating enzyme)
TRINITY_DN105399_c0_g1		3.3167	1.0967	1.8633	2.9333	5.7567	1.16	7.28	2.0067	cytochrome oxidase subunit 2 (mitochondrion	COG1622(Subunits I and II form the functional core of the enzyme complex. Electrons originating in cytochrome c are transferred via heme a and Cu(A) to the binuclear center formed by heme a3 and Cu(B) (By similarity))	sp|P00403|COX2_HUMAN(Cytochrome c oxidase subunit 2 OS=Homo sapiens OX=9606 GN=MT-CO2 PE=1 SV=1)	PF00116(COX2:Cytochrome C oxidase subunit II, periplasmic domain); PF02790(COX2_TM:Cytochrome C oxidase subunit II, transmembrane domain)
TRINITY_DN105405_c0_g1		0.48	0	0	0	0.0233	0	0.6667	0.01	hypothetical protein TanjilG_21843 [Lupinus angustifolius]	ENOG410Y65V((ribosomal) protein)		PF14111(DUF4283:Domain of unknown function (DUF4283))
TRINITY_DN10541_c0_g1		15.2233	18.6633	6.9267	15.4233	5.4333	3.83	41.86	9.0267
TRINITY_DN105485_c0_g1		0.17	0	3.1767	0	0	1.0233	0.08	0.04
TRINITY_DN10554_c0_g1		0.2667	0.8733	3.49	1.5533	1.0933	2.2733	0.6767	1.1767	PREDICTED: zinc finger protein CONSTANS-LIKE 16-like isoform X2 [Lupinus angustifolius]	COG5641(Transcription factor)	sp|Q8RWD0|COL16_ARATH(Zinc finger protein CONSTANS-LIKE 16 OS=Arabidopsis thaliana OX=3702 GN=COL16 PE=1 SV=2)	PF06203(CCT:CCT motif); PF00643(zf-B_box:B-box zinc finger)
TRINITY_DN10556_c0_g1		22.0867	18.5133	14.2067	13.1067	50.6233	23.3233	10.86	20.0867
TRINITY_DN10557_c0_g1		2.7267	1.6233	7.8967	3.24	2.6533	8.8667	4.3467	5.5467	PREDICTED: uncharacterized protein LOC109340398 [Lupinus angustifolius] >OIW21688.1 hypothetical protein TanjilG_08091 [Lupinus angustifolius]	ENOG4111N7Q(Uncharacterized conserved protein (DUF2358))
TRINITY_DN10572_c1_g1		9.2667	2.81	0.71	2.1733	3.05	0.8933	8.9867	1.76	PREDICTED: E3 ubiquitin-protein ligase BAH1-like isoform X1 [Lupinus angustifolius] >OIW12715.1 hypothetical protein TanjilG_24648 [Lupinus angustifolius]	ENOG4110S99(E3 ubiquitin-protein ligase BAH1-like)	sp|Q9SRX9|BAH1_ARATH(E3 ubiquitin-protein ligase BAH1 OS=Arabidopsis thaliana OX=3702 GN=BAH1 PE=1 SV=1)	PF03105(SPX:SPX domain)
TRINITY_DN10572_c1_g2		6.44	1.6567	1.0367	1.6233	1.7467	0.7733	6.58	1.31	PREDICTED: probable E3 ubiquitin-protein ligase BAH1-like 2 isoform X1 [Lupinus angustifolius]	ENOG4110S99(E3 ubiquitin-protein ligase BAH1-like)	sp|Q7XI73|BAHL2_ORYSJ(Probable E3 ubiquitin-protein ligase BAH1-like 2 OS=Oryza sativa subsp. japonica OX=39947 GN=Os07g0673200 PE=2 SV=1)	PF13445(zf-RING_UBOX:RING-type zinc-finger); PF00097(zf-C3HC4:Zinc finger, C3HC4 type (RING finger)); PF13639(zf-RING_2:Ring finger domain); PF13920(zf-C3HC4_3:Zinc finger, C3HC4 type (RING finger)); PF14634(zf-RING_5:zinc-RING finger domain); PF15227(zf-C3HC4_4:zinc finger of C3HC4-type, RING); PF03105(SPX:SPX domain); PF13923(zf-C3HC4_2:Zinc finger, C3HC4 type (RING finger))
TRINITY_DN10575_c0_g1		85.5033	31.0733	4.6167	30.94	45.58	22.0433	61.6733	17.96	PREDICTED: calcium-dependent protein kinase 17-like isoform X1 [Lupinus angustifolius]	ENOG410XRMJ(calcium-dependent protein kinase)	sp|Q9FMP5|CDPKH_ARATH(Calcium-dependent protein kinase 17 OS=Arabidopsis thaliana OX=3702 GN=CPK17 PE=2 SV=1)	PF00069(Pkinase:Protein kinase domain); PF00036(EF-hand_1:EF hand); PF13499(EF-hand_7:EF-hand domain pair); PF07714(Pkinase_Tyr:Protein tyrosine kinase); PF13405(EF-hand_6:EF-hand domain); PF13202(EF-hand_5:EF hand); PF13833(EF-hand_8:EF-hand domain pair); PF12763(EF-hand_4:Cytoskeletal-regulatory complex EF hand); PF14658(EF-hand_9:EF-hand domain); PF14531(Kinase-like:Kinase-like); PF06293(Kdo:L…
TRINITY_DN10580_c0_g1		0.9567	2.9733	5.3133	5.3267	1.8867	4.7767	3.12	3.1567	PREDICTED: subtilisin-like protease SBT2.3 [Lupinus angustifolius]	COG1404(peptidase (S8 and S53, subtilisin, kexin, sedolisin)	sp|Q9SUN6|SBT22_ARATH(Subtilisin-like protease SBT2.2 OS=Arabidopsis thaliana OX=3702 GN=SBT2.2 PE=3 SV=1)	PF00082(Peptidase_S8:Subtilase family); PF05922(Inhibitor_I9:Peptidase inhibitor I9); PF17766(fn3_6:Fibronectin type-III domain)
TRINITY_DN10596_c0_g2		6.1733	0.26	4.7433	0	10.3267	18.8033	0	0
TRINITY_DN10603_c0_g1		7.0467	0.55	0.21	0.7767	1.06	0.7967	0.78	0.9333	hypothetical protein TanjilG_23909 [Lupinus angustifolius]	ENOG41107WE(Peroxisomal biogenesis factor 2)	sp|Q9CA86|PEX2_ARATH(Peroxisome biogenesis protein 2 OS=Arabidopsis thaliana OX=3702 GN=PEX2 PE=1 SV=1)
TRINITY_DN10616_c0_g1		1.75	0.64	0.5667	0.5533	0.6	0.49	1.1067	0.55	PREDICTED: proline-rich receptor-like protein kinase PERK13 [Lupinus angustifolius]	COG0515(Serine Threonine protein kinase)	sp|Q9ZUE0|PEK12_ARATH(Proline-rich receptor-like protein kinase PERK12 OS=Arabidopsis thaliana OX=3702 GN=PERK12 PE=2 SV=2)	PF07714(Pkinase_Tyr:Protein tyrosine kinase); PF00069(Pkinase:Protein kinase domain)
TRINITY_DN10617_c0_g1		0.5867	16.4833	12.91	18.5867	5.6333	16.0933	10.8067	24.6433	PREDICTED: beta-amyrin 24-hydroxylase-like [Lupinus angustifolius] >OIW07544.1 hypothetical protein TanjilG_08431 [Lupinus angustifolius]	COG2124(Cytochrome p450)	sp|Q9XHC6|C93E1_SOYBN(Beta-amyrin 24-hydroxylase OS=Glycine max OX=3847 GN=CYP93E1 PE=1 SV=1)	PF00067(p450:Cytochrome P450)
TRINITY_DN10617_c2_g1		0.4367	0.23	0.8433	0.7633	0.82	1.0333	0.7533	0.6367	PREDICTED: protein yippee-like At5g53940 [Lupinus angustifolius]
TRINITY_DN10622_c0_g3		0.56	2.45	0.36	0.3367	10.8967	8.1367	0.3933	4.0233	PREDICTED: 7-deoxyloganetin glucosyltransferase-like [Lupinus angustifolius] >OIW20134.1 hypothetical protein TanjilG_02110 [Lupinus angustifolius]
TRINITY_DN10624_c0_g1		25.0033	34.21	130.247	37.7833	33.0167	53.3067	52.14	53.8467	hypothetical protein TanjilG_12741 [Lupinus angustifolius]	ENOG410ZE5B(-)
TRINITY_DN10624_c2_g2		1.16	3.0433	0.1533	0.4	1.46	1.1033	1.5467	0.1367
TRINITY_DN10627_c0_g1		1.75	10.93	40.1667	9.85	4.2667	28.0433	7.17	11.84	PREDICTED: heavy metal-associated isoprenylated plant protein 30-like [Lupinus angustifolius]	COG2608(expressed protein)	sp|F4IQG4|HIP30_ARATH(Heavy metal-associated isoprenylated plant protein 30 OS=Arabidopsis thaliana OX=3702 GN=HIPP30 PE=1 SV=1)	PF00403(HMA:Heavy-metal-associated domain)
TRINITY_DN10630_c2_g1		0.4067	0.6667	0.7133	0.63	0.0967	0.1833	0.1967	0.6067	Retrovirus-related Pol polyprotein from transposon TNT 1-94 [Cajanus cajan]	ENOG410XS4D(Retrotransposon protein)	sp|Q94HW2|POLR1_ARATH(Retrovirus-related Pol polyprotein from transposon RE1 OS=Arabidopsis thaliana OX=3702 GN=RE1 PE=2 SV=1)	PF07727(RVT_2:Reverse transcriptase (RNA-dependent DNA polymerase)); PF00665(rve:Integrase core domain); PF13976(gag_pre-integrs:GAG-pre-integrase domain)
TRINITY_DN10631_c0_g1		104.6	71.5967	13.8733	14.82	80.47	29.8067	14.2767	116.163	hypothetical protein TanjilG_11448 [Lupinus angustifolius]	COG5038(Domain-Containing protein)	sp|Q7XA06|SYT3_ARATH(Synaptotagmin-3 OS=Arabidopsis thaliana OX=3702 GN=SYT3 PE=2 SV=1)	PF00168(C2:C2 domain)
TRINITY_DN10633_c0_g1		1.76	5.65	4.3667	0.3033	3.3333	0	6.0767	5.2233
TRINITY_DN10634_c0_g1		6.6667	20.39	16.2367	16.4567	3.0667	3.46	10.3333	10.9833	hypothetical protein TanjilG_17399 [Lupinus angustifolius]	ENOG4112BMQ(TMV resistance protein N-like)	sp|F4JNB7|RPP5_ARATH(Disease resistance protein RPP5 OS=Arabidopsis thaliana OX=3702 GN=RPP5 PE=1 SV=1)	PF12799(LRR_4:Leucine Rich repeats (2 copies))
TRINITY_DN1063_c0_g2		14.2933	2.83	5.22	6.6167	13.5733	3.55	16.1067	9.6267	PREDICTED: homeobox protein knotted-1-like 7 isoform X2 [Lupinus angustifolius] >OIV94368.1 hypothetical protein TanjilG_25430 [Lupinus angustifolius]	ENOG410XPMQ(homeobox)	sp|P46606|HD1_BRANA(Homeobox protein HD1 OS=Brassica napus OX=3708 GN=HD1 PE=2 SV=1)	PF05920(Homeobox_KN:Homeobox KN domain); PF00046(Homeodomain:Homeodomain)
TRINITY_DN10640_c0_g1		3.2933	1.5267	2.2333	2.8233	2	0.1733	0.5933	4.5867	PREDICTED: uncharacterized protein LOC109345420 isoform X2 [Lupinus angustifolius] >OIW13825.1 hypothetical protein TanjilG_31714 [Lupinus angustifolius]	ENOG4111RDU(Uncharacterized conserved protein (DUF2358))		PF10184(DUF2358:Uncharacterized conserved protein (DUF2358))
TRINITY_DN106434_c0_g1		0.0167	0	0.0967	0	0.2133	0.4733	0	0.09	PREDICTED: uncharacterized protein LOC109332480 [Lupinus angustifolius]		sp|P0C2F6|RNHX1_ARATH(Putative ribonuclease H protein At1g65750 OS=Arabidopsis thaliana OX=3702 GN=At1g65750 PE=3 SV=1)	PF13456(RVT_3:Reverse transcriptase-like)
TRINITY_DN106479_c0_g1		0	0.0233	0.3167	0	0.15	0.0233	4.0867	0.17
TRINITY_DN10647_c0_g1		0.6133	1.32	3.0233	0.9067	1.1333	1.4833	2.21	8.3667	Purine permease 1 [Spatholobus suberectus]	ENOG410Y9BB(purine permease)	sp|Q9FZ95|PUP3_ARATH(Purine permease 3 OS=Arabidopsis thaliana OX=3702 GN=PUP3 PE=2 SV=1)	PF16913(PUNUT:Purine nucleobase transmembrane transport); PF00892(EamA:EamA-like transporter family)
TRINITY_DN10648_c0_g2		3.1767	1.1133	0.78	1.0467	0.0933	0.1333	1.7367	1.18	hypothetical protein TanjilG_13906 [Lupinus angustifolius]
TRINITY_DN106554_c0_g1		0.1133	0.4467	0	0	1.2167	4.0333	0	0	hypothetical protein TanjilG_08948 [Lupinus angustifolius]	COG0457(PRP8 pre-mRNA processing factor 8 homolog (S. cerevisiae))	sp|O14217|TOM70_SCHPO(Probable mitochondrial import receptor subunit tom70 OS=Schizosaccharomyces pombe (strain 972 / ATCC 24843) OX=284812 GN=tom70 PE=1 SV=1)	PF00515(TPR_1:Tetratricopeptide repeat); PF13414(TPR_11:TPR repeat); PF13431(TPR_17:Tetratricopeptide repeat); PF07719(TPR_2:Tetratricopeptide repeat)
TRINITY_DN1066_c0_g1		128.03	73.9733	49.44	196.52	141.503	118.5	138.803	35.5233	PREDICTED: dirigent protein 22-like [Lupinus angustifolius] >OIW00869.1 hypothetical protein TanjilG_12810 [Lupinus angustifolius]	ENOG410YGJA(Disease resistance response protein); ENOG410ZQVA(Disease resistance response)	sp|Q9C523|DIR19_ARATH(Dirigent protein 19 OS=Arabidopsis thaliana OX=3702 GN=DIR19 PE=2 SV=1)	PF03018(Dirigent:Dirigent-like protein)
TRINITY_DN10679_c0_g1		2.1	12.03	13.8667	11.0367	4.4367	9.4333	10.47	13.86	PREDICTED: protein DETOXIFICATION 21-like [Lupinus angustifolius] >OIW16613.1 hypothetical protein TanjilG_00063 [Lupinus angustifolius]	COG0534(Mate efflux family protein)	sp|Q8W488|DTX21_ARATH(Protein DETOXIFICATION 21 OS=Arabidopsis thaliana OX=3702 GN=DTX21 PE=1 SV=1)	PF01554(MatE:MatE); PF14667(Polysacc_synt_C:Polysaccharide biosynthesis C-terminal domain)
TRINITY_DN1067_c0_g1		1.79	3.8033	6.19	2.1667	3.8533	11.2267	5.5633	4.4267	PREDICTED: uncharacterized protein LOC109359708 [Lupinus angustifolius]	COG2801(Retrotransposon protein)	sp|P04323|POL3_DROME(Retrovirus-related Pol polyprotein from transposon 17.6 OS=Drosophila melanogaster OX=7227 GN=pol PE=4 SV=1)	PF17919(RT_RNaseH_2:RNase H-like domain found in reverse transcriptase); PF00078(RVT_1:Reverse transcriptase (RNA-dependent DNA polymerase)); PF17917(RT_RNaseH:RNase H-like domain found in reverse transcriptase); PF08284(RVP_2:Retroviral aspartyl protease); PF13975(gag-asp_proteas:gag-polyprotein putative aspartyl protease); PF13650(Asp_protease_2:Aspartyl protease); PF02160(Peptidase_A3:Cauliflo…
TRINITY_DN1067_c2_g1		1.6733	0.6467	0	0	0.3333	0	0.6067	0.4433
TRINITY_DN10684_c0_g1		2.7233	0.4	0	0.6333	0.6133	2.15	2.22	0.3
TRINITY_DN106857_c0_g1		0.8167	0.36	0.0267	0.0833	0.0833	0.0867	0.49	0.0533	hypothetical protein TanjilG_05823 [Lupinus angustifolius]	ENOG410XQ8V(synthase)	sp|Q3B724|CALS5_ARATH(Callose synthase 5 OS=Arabidopsis thaliana OX=3702 GN=CALS5 PE=1 SV=1)	PF04652(Vta1:Vta1 like)
TRINITY_DN10696_c0_g1		29.2267	10.7967	2.03	9.87	13.7533	6.97	21.59	5.81	PREDICTED: probable serine/threonine-protein kinase PBL7 [Lupinus angustifolius] >OIV95845.1 hypothetical protein TanjilG_06821 [Lupinus angustifolius]	COG0515(Serine Threonine protein kinase)	sp|F4JEQ2|PBL23_ARATH(Probable serine/threonine-protein kinase PBL23 OS=Arabidopsis thaliana OX=3702 GN=PBL23 PE=2 SV=1)	PF00069(Pkinase:Protein kinase domain); PF07714(Pkinase_Tyr:Protein tyrosine kinase)
TRINITY_DN10702_c0_g1		37.1633	63.19	340.187	259.963	141.703	73.0933	35.4733	61.1633	PREDICTED: heat shock 70 kDa protein [Lupinus angustifolius] >OIW19477.1 hypothetical protein TanjilG_09497 [Lupinus angustifolius]	COG0443(Heat shock protein)	sp|P26413|HSP70_SOYBN(Heat shock 70 kDa protein OS=Glycine max OX=3847 GN=HSP70 PE=3 SV=1)	PF00012(HSP70:Hsp70 protein); PF06723(MreB_Mbl:MreB/Mbl protein); PF02782(FGGY_C:FGGY family of carbohydrate kinases, C-terminal domain)
TRINITY_DN10710_c0_g1		11.1433	1.72	6.16	2.9033	6.9967	25.3033	1.8567	1.1933	hypothetical protein TanjilG_05283 [Lupinus angustifolius]	COG1404(peptidase (S8 and S53, subtilisin, kexin, sedolisin)	sp|Q9FK76|SBT56_ARATH(Subtilisin-like protease SBT5.6 OS=Arabidopsis thaliana OX=3702 GN=SBT5.6 PE=2 SV=1)	PF00082(Peptidase_S8:Subtilase family); PF17766(fn3_6:Fibronectin type-III domain); PF05922(Inhibitor_I9:Peptidase inhibitor I9); PF02225(PA:PA domain)
TRINITY_DN10714_c0_g1		88	27.1533	4.73	31.92	44.3233	22.3033	68.44	13.6333	PREDICTED: syntaxin-124-like [Lupinus angustifolius] >XP_019425645.1 PREDICTED: syntaxin-124-like [Lupinus angustifolius] >OIV91639.1 hypothetical protein TanjilG_09051 [Lupinus angustifolius]	COG5074(SYNtaxin)	sp|O64791|SY124_ARATH(Syntaxin-124 OS=Arabidopsis thaliana OX=3702 GN=SYP124 PE=2 SV=1)	PF00804(Syntaxin:Syntaxin); PF05739(SNARE:SNARE domain)
TRINITY_DN10714_c0_g2		33.3967	12.4	2.0667	11.6867	18.2967	8.2667	24.0167	6.2267	PREDICTED: syntaxin-124-like [Lupinus angustifolius] >OIV96135.1 hypothetical protein TanjilG_13067 [Lupinus angustifolius]	COG5074(SYNtaxin)	sp|O64791|SY124_ARATH(Syntaxin-124 OS=Arabidopsis thaliana OX=3702 GN=SYP124 PE=2 SV=1)	PF00804(Syntaxin:Syntaxin); PF05739(SNARE:SNARE domain)
TRINITY_DN10718_c1_g1		10.7467	4.23	3.51	16.91	8.3867	2.8833	15.37	4.4967	PREDICTED: ethylene-responsive transcription factor ERF023-like [Lupinus angustifolius] >OIW16766.1 hypothetical protein TanjilG_05500 [Lupinus angustifolius]	ENOG41118MR(Transcription factor)	sp|Q1ECI2|ERF23_ARATH(Ethylene-responsive transcription factor ERF023 OS=Arabidopsis thaliana OX=3702 GN=ERF023 PE=2 SV=1)	PF00847(AP2:AP2 domain)
TRINITY_DN10720_c0_g1		13.3167	10.2567	7.93	7.3633	5.5633	7.42	23.9867	11.57	PREDICTED: probable xyloglucan endotransglucosylase/hydrolase protein 8 [Lupinus angustifolius] >OIV92584.1 hypothetical protein TanjilG_07575 [Lupinus angustifolius]	ENOG410YAVH(xyloglucan endotransglucosylase hydrolase protein)	sp|Q8L9A9|XTH8_ARATH(Probable xyloglucan endotransglucosylase/hydrolase protein 8 OS=Arabidopsis thaliana OX=3702 GN=XTH8 PE=2 SV=2)	PF00722(Glyco_hydro_16:Glycosyl hydrolases family 16); PF06955(XET_C:Xyloglucan endo-transglycosylase (XET) C-terminus)
TRINITY_DN107255_c0_g1		1.15	0.28	0.4067	0.62	1.6467	0.2233	2.6533	0.3833	NADH-plastoquinone oxidoreductase subunit 2 (plastid	COG1009(Component of the ubiquinol-cytochrome c reductase complex (complex III or cytochrome b-c1 complex), which is a respiratory chain that generates an electrochemical potential coupled to ATP synthesis (By similarity)); COG1007(Component of the ubiquinol-cytochrome c reductase complex (complex III or cytochrome b-c1 complex), which is a respiratory chain that generates an electrochemical pote…	sp|P03891|NU2M_HUMAN(NADH-ubiquinone oxidoreductase chain 2 OS=Homo sapiens OX=9606 GN=MT-ND2 PE=1 SV=2)	PF00361(Proton_antipo_M:Proton-conducting membrane transporter); PF06444(NADH_dehy_S2_C:NADH dehydrogenase subunit 2 C-terminus)
TRINITY_DN107283_c0_g1		0.7267	0.2233	0.3467	0.4667	1.1667	0.3167	1.6033	0.4167	apocytochrome b (mitochondrion	COG1290(small EDRK-rich factor)	sp|P00156|CYB_HUMAN(Cytochrome b OS=Homo sapiens OX=9606 GN=MT-CYB PE=1 SV=2)	PF00033(Cytochrome_B:Cytochrome b/b6/petB); PF13631(Cytochrom_B_N_2:Cytochrome b(N-terminal)/b6/petB); PF00032(Cytochrom_B_C:Cytochrome b(C-terminal)/b6/petD)
TRINITY_DN107302_c0_g1		0.3	0.2067	0	0.0067	0.2467	0.0867	0.2033	0.1967	PREDICTED: cellulose synthase A catalytic subunit 7 [UDP-forming]-like isoform X2 [Lupinus angustifolius] >OIV98514.1 hypothetical protein TanjilG_18798 [Lupinus angustifolius]	COG1215(Glycosyl transferase, family 2)	sp|Q9SWW6|CESA7_ARATH(Cellulose synthase A catalytic subunit 7 [UDP-forming] OS=Arabidopsis thaliana OX=3702 GN=CESA7 PE=1 SV=1)	PF03552(Cellulose_synt:Cellulose synthase); PF13632(Glyco_trans_2_3:Glycosyl transferase family group 2)
TRINITY_DN10732_c0_g1		0.1267	0.01	0.0233	2.0233	0.7	0.0467	0.6733	1.8467	hypothetical protein TSUD_42710 [Trifolium subterraneum]	ENOG410ZMT4(peroxidase)	sp|Q96520|PER12_ARATH(Peroxidase 12 OS=Arabidopsis thaliana OX=3702 GN=PER12 PE=1 SV=1)	PF00141(peroxidase:Peroxidase)
TRINITY_DN10733_c0_g1		13.6667	13.3967	25.2233	5.23	13.9233	26.5	14.07	7.29	hypothetical protein TanjilG_22033 [Lupinus angustifolius]	ENOG410Z28U(auxin-induced protein)	sp|O65695|SAU50_ARATH(Auxin-responsive protein SAUR50 OS=Arabidopsis thaliana OX=3702 GN=SAUR50 PE=1 SV=1)	PF02519(Auxin_inducible:Auxin responsive protein)
TRINITY_DN107431_c0_g1		0.2033	0	0	0	0	0.8267	0	0.0133	PREDICTED: gibberellin 20 oxidase 1-D-like [Lupinus angustifolius] >OIW17817.1 hypothetical protein TanjilG_02445 [Lupinus angustifolius]	COG3491(2OGFe(II) oxygenase)	sp|Q39111|GAOX2_ARATH(Gibberellin 20 oxidase 2 OS=Arabidopsis thaliana OX=3702 GN=GA20OX2 PE=2 SV=1)	PF03171(2OG-FeII_Oxy:2OG-Fe(II) oxygenase superfamily); PF14226(DIOX_N:non-haem dioxygenase in morphine synthesis N-terminal)
TRINITY_DN107434_c0_g1		1.4333	0.7067	0	0	2.07	1.44	0.3033	0.01	PREDICTED: uncharacterized protein LOC109359660 [Lupinus angustifolius]
TRINITY_DN10746_c0_g1		4.3067	22.5333	14.26	3.3467	8.18	21.2767	0	17.2933
TRINITY_DN10748_c0_g1		3.4967	2.1533	1.03	6.3433	8.5533	0	2.9433	8.3367	hypothetical protein TanjilG_23586 [Lupinus angustifolius]	COG2265(catalyzes the formation of 5-methyl-uridine at position)
TRINITY_DN1074_c0_g1		14.22	5.0267	0.82	5.3267	7.2733	3.67	12.9033	2.8667	PREDICTED: putative clathrin assembly protein At1g25240 [Lupinus angustifolius] >OIW18920.1 hypothetical protein TanjilG_25363 [Lupinus angustifolius]	ENOG410XQ90(Clathrin assembly protein)	sp|Q9FRH3|CAP13_ARATH(Putative clathrin assembly protein At1g25240 OS=Arabidopsis thaliana OX=3702 GN=At1g25240 PE=3 SV=1)	PF07651(ANTH:ANTH domain)
TRINITY_DN1074_c0_g2		1.3333	0.2967	0.12	0.25	0.42	0.19	1.6433	0.5033	PREDICTED: putative clathrin assembly protein At1g25240 [Lupinus angustifolius] >OIW00724.1 hypothetical protein TanjilG_09693 [Lupinus angustifolius]	ENOG410XQ90(Clathrin assembly protein)	sp|Q9FRH3|CAP13_ARATH(Putative clathrin assembly protein At1g25240 OS=Arabidopsis thaliana OX=3702 GN=At1g25240 PE=3 SV=1)	PF07651(ANTH:ANTH domain)
TRINITY_DN10752_c0_g1		1.66	2.5633	11.8	4.2367	1.66	4.8133	5.0833	5.9067	PREDICTED: cellulose synthase-like protein G2 isoform X1 [Lupinus angustifolius] >OIV93238.1 hypothetical protein TanjilG_27417 [Lupinus angustifolius]	COG1215(Glycosyl transferase, family 2)	sp|Q0WVN5|CSLG3_ARATH(Cellulose synthase-like protein G3 OS=Arabidopsis thaliana OX=3702 GN=CSLG3 PE=2 SV=2)	PF03552(Cellulose_synt:Cellulose synthase)
TRINITY_DN107548_c0_g1		1.07	0.3333	0.45	1.0667	2.0367	0.3533	2.4767	0.6667	40S ribosomal protein S2-1 [Capsicum baccatum]	COG0098(-)	sp|P15880|RS2_HUMAN(40S ribosomal protein S2 OS=Homo sapiens OX=9606 GN=RPS2 PE=1 SV=2)	PF00333(Ribosomal_S5:Ribosomal protein S5, N-terminal domain); PF03719(Ribosomal_S5_C:Ribosomal protein S5, C-terminal domain)
TRINITY_DN10755_c0_g1		7.3733	5.64	7.68	7.8167	2.9467	3.27	1.46	2.7233
TRINITY_DN10758_c0_g1		9.6467	41.75	32.3267	20.6733	31.6233	69.5733	29.1667	32.37	hypothetical protein TanjilG_00335 [Lupinus angustifolius]	COG0515(Serine Threonine protein kinase)	sp|C0LGG4|Y1518_ARATH(Probable LRR receptor-like serine/threonine-protein kinase At1g51860 OS=Arabidopsis thaliana OX=3702 GN=At1g51860 PE=2 SV=2)	PF07714(Pkinase_Tyr:Protein tyrosine kinase); PF00069(Pkinase:Protein kinase domain)
TRINITY_DN107594_c0_g1		20.12	6.3967	1.1133	6.53	10.6933	4.9933	14.3967	5.0567	PREDICTED: oligopeptide transporter 1-like [Lupinus angustifolius]	ENOG410XNZC(oligo-peptide transporter)	sp|Q9SUA4|OPT5_ARATH(Oligopeptide transporter 5 OS=Arabidopsis thaliana OX=3702 GN=OPT5 PE=2 SV=1)	PF03169(OPT:OPT oligopeptide transporter protein)
TRINITY_DN10759_c0_g1		15.8667	4.13	6.1367	15.0867	8.3033	1.99	19.3967	5.0333	PREDICTED: pathogen-related protein-like [Lupinus angustifolius]	ENOG4111JSH(Pathogenesis related protein-like protein)	sp|P16273|PRPX_HORVU(Pathogen-related protein OS=Hordeum vulgare OX=4513 PE=2 SV=2)	PF07366(SnoaL:SnoaL-like polyketide cyclase)
TRINITY_DN10763_c0_g1		9.9467	1.65	0.2433	2.1333	2.01	1.0767	11.97	1.9833	hypothetical protein CR513_62963, partial [Mucuna pruriens]	COG0023(Importin)	sp|O48650|SUI1_SALBA(Protein translation factor SUI1 homolog OS=Salix bakko OX=72444 PE=3 SV=1)	PF01253(SUI1:Translation initiation factor SUI1)
TRINITY_DN10764_c0_g1		2.0833	2.6333	0.59	1.4067	1.2267	0.9233	2.59	2.8967	PREDICTED: 3-ketodihydrosphingosine reductase-like isoform X2 [Lupinus angustifolius] >OIW09769.1 hypothetical protein TanjilG_18684 [Lupinus angustifolius]	COG0300(Dehydrogenase); COG1028(Dehydrogenase reductase)	sp|Q56840|HCDR_XANP2(2-(R)-hydroxypropyl-CoM dehydrogenase OS=Xanthobacter autotrophicus (strain ATCC BAA-1158 / Py2) OX=78245 GN=xecD PE=1 SV=3)	PF00106(adh_short:short chain dehydrogenase); PF13561(adh_short_C2:Enoyl-(Acyl carrier protein) reductase)
TRINITY_DN107688_c0_g1		0.8167	0.0467	0.0133	0.03	0.0167	0.0167	0.6867	0.0133
TRINITY_DN1076_c0_g1		6	2.1767	0.21	1.7	2.23	1.24	4.3867	1.0533	PREDICTED: protein NETWORKED 4A-like [Lupinus angustifolius]	ENOG410YMAJ(Kinase interacting)	sp|F4KEW8|NET4A_ARATH(Protein NETWORKED 4A OS=Arabidopsis thaliana OX=3702 GN=NET4A PE=2 SV=1)	PF07765(KIP1:KIP1-like protein)
TRINITY_DN1076_c1_g1		57.51	18.24	3.67	22.34	31.1333	17.0233	40.7967	14.0033	PREDICTED: protein NETWORKED 4A-like [Lupinus angustifolius]	ENOG410YMAJ(Kinase interacting)	sp|F4KEW8|NET4A_ARATH(Protein NETWORKED 4A OS=Arabidopsis thaliana OX=3702 GN=NET4A PE=2 SV=1)	PF07765(KIP1:KIP1-like protein)
TRINITY_DN107769_c0_g1		0	0	0.13	0	0	11.6267	0.4	0
TRINITY_DN10780_c0_g1		0	0	15.0767	13.7067	0	0	10.53	0.18	PREDICTED: dentin sialophosphoprotein-like [Lupinus angustifolius] >OIW18615.1 hypothetical protein TanjilG_13367 [Lupinus angustifolius]	ENOG410XP4Y(be involved in pre-mRNA splicing (By similarity))
TRINITY_DN10813_c0_g1		9.5167	7.7933	5.3067	24.6567	3.1667	20.23	11.3667	15.51
TRINITY_DN10816_c0_g1		2.4533	7.85	130.063	115.147	8.7	6.9433	37.7533	26.82	PREDICTED: multiprotein-bridging factor 1c [Lupinus angustifolius] >OIW08898.1 hypothetical protein TanjilG_05873 [Lupinus angustifolius]	COG1813(DENN MADD domain containing)	sp|Q9LV58|MBF1C_ARATH(Multiprotein-bridging factor 1c OS=Arabidopsis thaliana OX=3702 GN=MBF1C PE=1 SV=1)	PF08523(MBF1:Multiprotein bridging factor 1); PF01381(HTH_3:Helix-turn-helix); PF12844(HTH_19:Helix-turn-helix domain)
TRINITY_DN10819_c0_g2		0.36	0.0333	1.4767	0.6067	0.3933	0.8933	0.6	0.36				PF13293(DUF4074:Domain of unknown function (DUF4074))
TRINITY_DN10821_c0_g1		301.493	108.66	17.3833	115.043	190.753	81.3133	229.237	60.3667	PREDICTED: LIM domain-containing protein WLIM2a-like [Lupinus angustifolius] >XP_019446595.1 PREDICTED: LIM domain-containing protein WLIM2a-like [Lupinus angustifolius] >OIW09865.1 hypothetical protein TanjilG_15347 [Lupinus angustifolius]	ENOG410XWQ8(LIM domain); COG5069(Microtubule associated monoxygenase, calponin and LIM domain containing); ENOG410YE71(Pollen-specific protein SF3); ENOG410XUEW(Cysteine-rich protein 2)	sp|O04193|WLI2A_ARATH(LIM domain-containing protein WLIM2a OS=Arabidopsis thaliana OX=3702 GN=WLIN2A PE=1 SV=1)	PF00412(LIM:LIM domain)
TRINITY_DN10823_c0_g1		200.677	120.59	72.7733	49.75	64.9233	69.5567	247.3	144.397	PREDICTED: uncharacterized protein LOC109350724 [Lupinus angustifolius] >XP_019447538.1 PREDICTED: uncharacterized protein LOC109350724 [Lupinus angustifolius]	ENOG410YE8S(expressed protein)		PF04862(DUF642:Protein of unknown function (DUF642))
TRINITY_DN10828_c0_g1		0.0967	3.8867	3.32	1.2133	1.19	4.02	1.9	3.1	PREDICTED: platelet glycoprotein Ib alpha chain-like [Lupinus angustifolius] >OIW10453.1 hypothetical protein TanjilG_00391 [Lupinus angustifolius]
TRINITY_DN10840_c0_g1		0.8	2.3833	4.94	5.5533	0.8933	1.4967	2.11	2.1633	PREDICTED: WUSCHEL-related homeobox 8-like isoform X2 [Lupinus angustifolius] >OIW06829.1 hypothetical protein TanjilG_03724 [Lupinus angustifolius]	ENOG4111P6E(wuschel-related homeobox)	sp|Q5QMM3|WOX8_ORYSJ(WUSCHEL-related homeobox 8 OS=Oryza sativa subsp. japonica OX=39947 GN=WOX8 PE=2 SV=1)	PF00046(Homeodomain:Homeodomain)
TRINITY_DN10841_c0_g1		0.07	0.1733	13.5367	5.39	0.13	0.3267	0.2467	0.2	PREDICTED: small heat shock protein, chloroplastic [Lupinus angustifolius] >OIV96938.1 hypothetical protein TanjilG_00520 [Lupinus angustifolius]	COG0071(Rna-binding protein)	sp|P09886|HS21C_PEA(Small heat shock protein, chloroplastic OS=Pisum sativum OX=3888 GN=HSP21 PE=2 SV=1)	PF00011(HSP20:Hsp20/alpha crystallin family); PF17886(ArsA_HSP20:HSP20-like domain found in ArsA)
TRINITY_DN10843_c0_g1		5.06	3.3133	0	1.0567	1.4367	0	3.83	1.56	B3 domain-containing transcription repressor VAL isoform X5 [Spatholobus suberectus]	ENOG410Z235(B3 domain-containing protein)	sp|Q6Z3U3|Y7797_ORYSJ(B3 domain-containing protein Os07g0679700 OS=Oryza sativa subsp. japonica OX=39947 GN=Os07g0679700 PE=2 SV=1)
TRINITY_DN10844_c0_g1		0.84	0	0.1133	0.98	0.23	0.05	0.3233	0.02	hypothetical protein TanjilG_25379 [Lupinus angustifolius]	COG5228(Ccr4-not transcription complex, subunit)	sp|Q9LXM2|CAF1I_ARATH(Probable CCR4-associated factor 1 homolog 9 OS=Arabidopsis thaliana OX=3702 GN=CAF1-9 PE=2 SV=1)
TRINITY_DN1084_c0_g2		906.567	616.72	281.24	661.88	1089.45	542.25	463.51	822.597	PREDICTED: uncharacterized protein LOC109347353 [Lupinus angustifolius] >OIW12464.1 hypothetical protein TanjilG_04213 [Lupinus angustifolius]	ENOG4111M1K(Protein of unknown function (DUF1997))		PF09366(DUF1997:Protein of unknown function (DUF1997))
TRINITY_DN1085_c0_g1		0.1167	0.3267	3.1867	1.0633	0.2133	2.26	0.2433	1.7967	PREDICTED: bidirectional sugar transporter SWEET3-like [Lupinus angustifolius] >OIW15252.1 hypothetical protein TanjilG_16502 [Lupinus angustifolius]	ENOG4111M4R(sugar transporter)	sp|Q6NQN5|SWET3_ARATH(Bidirectional sugar transporter SWEET3 OS=Arabidopsis thaliana OX=3702 GN=SWEET3 PE=1 SV=1)	PF03083(MtN3_slv:Sugar efflux transporter for intercellular exchange); PF00892(EamA:EamA-like transporter family)
TRINITY_DN10862_c0_g1		0.1733	3.12	2.49	4.44	1.7233	2.75	2.75	1.8233	PREDICTED: stress-response A/B barrel domain-containing protein At5g22580-like [Lupinus angustifolius] >OIW05851.1 hypothetical protein TanjilG_23637 [Lupinus angustifolius]	ENOG410YNSU(Dabb)	sp|Q9FK81|Y5258_ARATH(Stress-response A/B barrel domain-containing protein At5g22580 OS=Arabidopsis thaliana OX=3702 GN=At5g22580 PE=1 SV=1)	PF07876(Dabb:Stress responsive A/B Barrel Domain)
TRINITY_DN10863_c0_g1		1.6967	1.17	0.95	0.0933	2.6467	0	0.0633	0.8633
TRINITY_DN10863_c0_g2		0.4567	0.2833	0	0.6167	0.0633	1.35	0.4967	0
TRINITY_DN10865_c0_g1		2.4867	7.0467	13.0133	6.53	4.5867	6.5033	3.9333	4.7767	PREDICTED: uncharacterized protein LOC109332653 [Lupinus angustifolius] >OIV92759.1 hypothetical protein TanjilG_00893 [Lupinus angustifolius]	ENOG410Z7Z7(Pentatricopeptide repeat-containing protein)
TRINITY_DN10871_c1_g2		1.08	2.0267	0.5867	0.43	2.2233	1.18	0.5533	0.24	hypothetical protein TanjilG_09174 [Lupinus angustifolius]
TRINITY_DN10877_c0_g1		0.76	0.6367	0.79	0.1567	0.53	1.02	0.11	0.7733
TRINITY_DN10883_c0_g1		0.7233	2.9567	0.6967	1.57	1.1767	0.9033	6.0867	0.52	PREDICTED: transcription factor bHLH149-like [Lupinus angustifolius] >OIW13060.1 hypothetical protein TanjilG_17620 [Lupinus angustifolius]	ENOG410YRF4(Transcription factor)	sp|O80482|BH149_ARATH(Transcription factor bHLH149 OS=Arabidopsis thaliana OX=3702 GN=BHLH149 PE=1 SV=1)
TRINITY_DN10885_c0_g1		0.2767	0.3133	1.9267	0.81	0.5067	1.8767	0.8833	2.07	PREDICTED: putative nuclease HARBI1 [Lupinus angustifolius]	ENOG411206Y(transposon protein)	sp|Q9M2U3|ALPL_ARATH(Protein ALP1-like OS=Arabidopsis thaliana OX=3702 GN=At3g55350 PE=2 SV=1)	PF13359(DDE_Tnp_4:DDE superfamily endonuclease)
TRINITY_DN10886_c0_g1		0.3567	0.5667	1.3233	0.9067	0.6033	2.5533	1.64	0.74	PREDICTED: RNA-binding protein 34-like isoform X2 [Lupinus angustifolius]	COG0724(Rna-binding protein)	sp|Q8C5L7|RBM34_MOUSE(RNA-binding protein 34 OS=Mus musculus OX=10090 GN=Rbm34 PE=1 SV=1)	PF00076(RRM_1:RNA recognition motif. (a.k.a. RRM, RBD, or RNP domain)); PF16367(RRM_7:RNA recognition motif)
TRINITY_DN10888_c0_g1		27.0833	8.7867	1.56	10.2367	13.2667	6.88	19.54	5.2067	PREDICTED: patellin-4-like [Lupinus angustifolius] >OIV90517.1 hypothetical protein TanjilG_32394 [Lupinus angustifolius]	ENOG410XRSQ(Alpha beta hydrolase)	sp|Q94C59|PATL4_ARATH(Patellin-4 OS=Arabidopsis thaliana OX=3702 GN=PATL4 PE=1 SV=2)	PF00650(CRAL_TRIO:CRAL/TRIO domain); PF03765(CRAL_TRIO_N:CRAL/TRIO, N-terminal domain)
TRINITY_DN10889_c2_g1		1.53	1.9233	6.26	3.9767	3.9733	8.3267	2.6467	2.3667	Retrovirus-related Pol polyprotein from transposon TNT 1-94 [Cajanus cajan]	ENOG410XS4D(Retrotransposon protein)	sp|Q94HW2|POLR1_ARATH(Retrovirus-related Pol polyprotein from transposon RE1 OS=Arabidopsis thaliana OX=3702 GN=RE1 PE=2 SV=1)	PF07727(RVT_2:Reverse transcriptase (RNA-dependent DNA polymerase)); PF00665(rve:Integrase core domain); PF14244(Retrotran_gag_3:gag-polypeptide of LTR copia-type); PF13976(gag_pre-integrs:GAG-pre-integrase domain); PF14223(Retrotran_gag_2:gag-polypeptide of LTR copia-type); PF03732(Retrotrans_gag:Retrotransposon gag protein)
TRINITY_DN10892_c1_g1		0.1333	0.64	6.8167	0.7233	0.2	1.5233	1.4033	0.5133
TRINITY_DN10898_c0_g1		1.14	2.4533	2.5833	11.59	1.2467	1.2433	0.71	1.9367	PREDICTED: MLP-like protein 423 isoform X1 [Lupinus angustifolius] >OIW10551.1 hypothetical protein TanjilG_15923 [Lupinus angustifolius]	ENOG410YSJN(MLP-like protein)	sp|Q93VR4|ML423_ARATH(MLP-like protein 423 OS=Arabidopsis thaliana OX=3702 GN=MLP423 PE=2 SV=1)	PF00407(Bet_v_1:Pathogenesis-related protein Bet v I family); PF10604(Polyketide_cyc2:Polyketide cyclase / dehydrase and lipid transport)
TRINITY_DN10898_c0_g2		0.12	2.3167	7.0967	10.7333	1.98	6.2133	2.8667	3.89	PREDICTED: MLP-like protein 423 isoform X2 [Lupinus angustifolius] >OIW10550.1 hypothetical protein TanjilG_15922 [Lupinus angustifolius]	ENOG410YSJN(MLP-like protein)	sp|Q93VR4|ML423_ARATH(MLP-like protein 423 OS=Arabidopsis thaliana OX=3702 GN=MLP423 PE=2 SV=1)	PF00407(Bet_v_1:Pathogenesis-related protein Bet v I family); PF10604(Polyketide_cyc2:Polyketide cyclase / dehydrase and lipid transport)
TRINITY_DN10905_c0_g2		2.25	1.4367	9.94	16.01	2.9067	6.8467	8.5633	21.3367	PREDICTED: protein DOWNY MILDEW RESISTANCE 6 [Lupinus angustifolius] >OIV96916.1 hypothetical protein TanjilG_00498 [Lupinus angustifolius]	COG3491(2OGFe(II) oxygenase)	sp|Q9FLV0|DMR6_ARATH(Protein DOWNY MILDEW RESISTANCE 6 OS=Arabidopsis thaliana OX=3702 GN=DMR6 PE=1 SV=1)	PF03171(2OG-FeII_Oxy:2OG-Fe(II) oxygenase superfamily); PF14226(DIOX_N:non-haem dioxygenase in morphine synthesis N-terminal)
TRINITY_DN10909_c0_g1		200.603	71.6433	41.6133	65.6167	108.037	57.89	108.073	81.5367	PREDICTED: expansin-A4-like [Lupinus angustifolius] >OIV95652.1 hypothetical protein TanjilG_01446 [Lupinus angustifolius]	ENOG410YCRV(loosening and extension of plant cell walls by disrupting non-covalent bonding between cellulose microfibrils and matrix glucans. No enzymatic activity has been found)	sp|O22874|EXPA8_ARATH(Expansin-A8 OS=Arabidopsis thaliana OX=3702 GN=EXPA8 PE=2 SV=1)	PF03330(DPBB_1:Lytic transglycolase)
TRINITY_DN10913_c0_g1		20.18	1.9567	2.56	37.79	8.7433	2.2267	15.7667	1.88	hypothetical protein TanjilG_08585 [Lupinus angustifolius]
TRINITY_DN10929_c0_g1		3.4267	0.4267	0.0233	0.3	0.13	0.0633	5.6767	0.3567	PREDICTED: L-ascorbate oxidase homolog [Lupinus angustifolius] >OIV94224.1 hypothetical protein TanjilG_09379 [Lupinus angustifolius]	COG2132(Multicopper oxidase)	sp|Q00624|ASOL_BRANA(L-ascorbate oxidase homolog OS=Brassica napus OX=3708 GN=Bp10 PE=2 SV=1)	PF07732(Cu-oxidase_3:Multicopper oxidase); PF00394(Cu-oxidase:Multicopper oxidase); PF07731(Cu-oxidase_2:Multicopper oxidase)
TRINITY_DN10929_c1_g2		0.6267	0.0333	0	0.0167	0.0967	0.0367	0.3667	0.03	PREDICTED: L-ascorbate oxidase homolog [Lupinus angustifolius] >OIW10250.1 hypothetical protein TanjilG_28001 [Lupinus angustifolius]	COG2132(integral membrane protein)	sp|Q00624|ASOL_BRANA(L-ascorbate oxidase homolog OS=Brassica napus OX=3708 GN=Bp10 PE=2 SV=1)	PF00394(Cu-oxidase:Multicopper oxidase); PF07731(Cu-oxidase_2:Multicopper oxidase)
TRINITY_DN10931_c0_g1		2.0767	14.8467	11.2167	7.0933	7.4333	5.6767	8.66	10.4267	PREDICTED: uncharacterized protein LOC105350638 [Fragaria vesca subsp. vesca]	ENOG410Z64N(-)
TRINITY_DN10936_c0_g1		0.7467	3.3667	7.08	3.1467	2.59	3.36	2.7767	3.2067
TRINITY_DN10943_c0_g1		2.28	4.3567	19.15	3.9267	4.3067	5.7	3.64	5.71	PREDICTED: xylulose kinase [Lupinus angustifolius] >OIV97825.1 hypothetical protein TanjilG_12582 [Lupinus angustifolius]	COG1070(Carbohydrate kinase)	sp|Q949W8|XK2_ARATH(Xylulose kinase 2 OS=Arabidopsis thaliana OX=3702 GN=XK2 PE=1 SV=1)	PF02782(FGGY_C:FGGY family of carbohydrate kinases, C-terminal domain)
TRINITY_DN10945_c0_g1		249.573	80.13	15.2367	95.6667	139.06	62.1667	218.93	50.1933	PREDICTED: ATPase 8, plasma membrane-type-like [Lupinus angustifolius] >OIW19507.1 hypothetical protein TanjilG_06962 [Lupinus angustifolius]	COG0474(P-type atpase)	sp|Q9M2A0|PMA8_ARATH(ATPase 8, plasma membrane-type OS=Arabidopsis thaliana OX=3702 GN=AHA8 PE=3 SV=1)
TRINITY_DN10946_c0_g1		0.45	1.7233	3.1633	2.31	1.0367	2.15	1.62	1.77	PREDICTED: U-box domain-containing protein 5 [Lupinus angustifolius] >XP_019421057.1 PREDICTED: U-box domain-containing protein 5 [Lupinus angustifolius] >XP_019421058.1 PREDICTED: U-box domain-containing protein 5 [Lupinus angustifolius]	ENOG410YE2N(Ubox domain-containing protein)	sp|O23225|PUB5_ARATH(U-box domain-containing protein 5 OS=Arabidopsis thaliana OX=3702 GN=PUB5 PE=3 SV=3)	PF04564(U-box:U-box domain); PF05804(KAP:Kinesin-associated protein (KAP))
TRINITY_DN10952_c0_g1		27.8633	10.67	1.5567	10.0333	13.9167	7.2	18.9167	5.27	PREDICTED: uncharacterized protein LOC109359332 isoform X2 [Lupinus angustifolius]	ENOG410YQG1(C2 domain-containing protein)		PF00168(C2:C2 domain)
TRINITY_DN10957_c0_g1		10.5167	0.9267	0	1.4133	0.6533	0.3	6.0133	0.5767	hypothetical protein TanjilG_07463 [Lupinus angustifolius]	COG4677(pectinesterase)	sp|Q7Y201|PME13_ARATH(Probable pectinesterase/pectinesterase inhibitor 13 OS=Arabidopsis thaliana OX=3702 GN=PME13 PE=2 SV=2)	PF01095(Pectinesterase:Pectinesterase)
TRINITY_DN10959_c0_g1		12.85	6.1967	3.9633	7.9633	8.28	5.7867	9.79	3.9367	PREDICTED: ARM REPEAT PROTEIN INTERACTING WITH ABF2-like isoform X1 [Lupinus angustifolius]	ENOG410XRTN(U-box domain-containing protein)	sp|B9DHT4|ARIA_ARATH(ARM REPEAT PROTEIN INTERACTING WITH ABF2 OS=Arabidopsis thaliana OX=3702 GN=ARIA PE=1 SV=2)	PF00651(BTB:BTB/POZ domain)
TRINITY_DN10966_c0_g1		52.52	35.5767	176.03	39.6833	29.9567	35.9267	89.7333	61.1267	PREDICTED: cytochrome P450 89A2-like [Lupinus angustifolius] >OIV92908.1 hypothetical protein TanjilG_01042 [Lupinus angustifolius]	COG2124(Cytochrome p450)	sp|Q42602|C89A2_ARATH(Cytochrome P450 89A2 OS=Arabidopsis thaliana OX=3702 GN=CYP89A2 PE=2 SV=2)	PF00067(p450:Cytochrome P450)
TRINITY_DN10968_c0_g1		0.6433	0.7567	3.89	1.1467	0.89	1.3233	2.9467	5.05	PREDICTED: crocetin glucosyltransferase, chloroplastic-like [Lupinus angustifolius] >OIW21963.1 hypothetical protein TanjilG_18161 [Lupinus angustifolius]	COG1819(Transferase)	sp|K4CWS6|U75C1_SOLLC(UDP-glycosyltransferase 75C1 OS=Solanum lycopersicum OX=4081 GN=UGT75C1 PE=1 SV=1)	PF00201(UDPGT:UDP-glucoronosyl and UDP-glucosyl transferase)
TRINITY_DN10970_c0_g1		22.0967	49.4	2.1567	7.6833	11.92	24.15	10.0467	26.1767	hypothetical protein TSUD_86680 [Trifolium subterraneum]	ENOG410ZJSX(protein FAR1-RELATED SEQUENCE 5-like)	sp|Q9SZL8|FRS5_ARATH(Protein FAR1-RELATED SEQUENCE 5 OS=Arabidopsis thaliana OX=3702 GN=FRS5 PE=1 SV=1)
TRINITY_DN10976_c0_g1		61.4233	18.83	3.6433	25.36	25.4933	12.6633	48.3433	9.5633	PREDICTED: guanine nucleotide-binding protein subunit beta-like protein [Lupinus angustifolius] >OIW03450.1 hypothetical protein TanjilG_14675 [Lupinus angustifolius]	ENOG410XP1Z(BURP domain-containing protein); ENOG410YAAP(WD domain, G-beta repeat); COG2319(WD domain, G-beta repeat)	sp|O48716|JGB_ARATH(Protein JINGUBANG OS=Arabidopsis thaliana OX=3702 GN=JGB PE=1 SV=1)	PF00400(WD40:WD domain, G-beta repeat); PF11715(Nup160:Nucleoporin Nup120/160)
TRINITY_DN1097_c0_g1		62.7833	21.2367	3.5667	19.9233	31.86	13.0067	43.2833	12.96	PREDICTED: kinesin-like protein KIN-14I isoform X1 [Lupinus angustifolius] >XP_019422757.1 PREDICTED: kinesin-like protein KIN-14I isoform X1 [Lupinus angustifolius]	COG5059(Kinesin family member)	sp|F4IL57|KN14I_ARATH(Kinesin-like protein KIN-14I OS=Arabidopsis thaliana OX=3702 GN=KIN14I PE=2 SV=1)	PF16796(Microtub_bd:Microtubule binding); PF00225(Kinesin:Kinesin motor domain); PF00307(CH:Calponin homology (CH) domain)
TRINITY_DN1097_c0_g2		54.4833	17.88	2.9233	19.1333	26.78	12.62	39.9833	10.9267	PREDICTED: kinesin-like protein KIN-14I isoform X1 [Lupinus angustifolius] >XP_019422757.1 PREDICTED: kinesin-like protein KIN-14I isoform X1 [Lupinus angustifolius]	COG5059(Kinesin family member)	sp|O81635|KN14G_ARATH(Kinesin-like protein KIN-14G OS=Arabidopsis thaliana OX=3702 GN=KIN14G PE=1 SV=2)	PF00225(Kinesin:Kinesin motor domain); PF16796(Microtub_bd:Microtubule binding); PF00307(CH:Calponin homology (CH) domain)
TRINITY_DN1097_c1_g1		31.16	7.4767	1.5167	5.0833	13.71	3.7367	9.5433	3.9767	PREDICTED: kinesin-like protein KIN-14I isoform X1 [Lupinus angustifolius] >XP_019422757.1 PREDICTED: kinesin-like protein KIN-14I isoform X1 [Lupinus angustifolius]	COG5059(Protein of unknown function (DUF1997))	sp|F4IL57|KN14I_ARATH(Kinesin-like protein KIN-14I OS=Arabidopsis thaliana OX=3702 GN=KIN14I PE=2 SV=1)	PF00225(Kinesin:Kinesin motor domain); PF16796(Microtub_bd:Microtubule binding)
TRINITY_DN10980_c0_g2		0.5367	1.05	0.27	1.02	0.58	0.0433	0.2533	0.18	PREDICTED: uncharacterized protein LOC109328604 [Lupinus angustifolius] >OIV96984.1 hypothetical protein TanjilG_31875 [Lupinus angustifolius]	ENOG410ZNCI(TLD)
TRINITY_DN10985_c0_g1		7.9233	11.16	475.883	254.38	17.3667	20.2133	6.1533	25.3	PREDICTED: 17.8 kDa class I heat shock protein-like [Lupinus angustifolius] >OIW14199.1 hypothetical protein TanjilG_21339 [Lupinus angustifolius]	COG0071(response to heat)	sp|P04793|HSP13_SOYBN(17.5 kDa class I heat shock protein OS=Glycine max OX=3847 GN=HSP17.5-M PE=3 SV=1)	PF00011(HSP20:Hsp20/alpha crystallin family); PF17886(ArsA_HSP20:HSP20-like domain found in ArsA)
TRINITY_DN1099_c0_g2		12.04	12.0233	4.0033	8.46	11.1367	7.4467	17.43	16.3167	PREDICTED: protein trichome birefringence-like 39 [Lupinus angustifolius] >OIW08325.1 hypothetical protein TanjilG_03001 [Lupinus angustifolius]	ENOG410YAJT(function domain containing protein, expressed)	sp|Q67XC4|TBL40_ARATH(Protein trichome birefringence-like 40 OS=Arabidopsis thaliana OX=3702 GN=TBL40 PE=2 SV=2)	PF13839(PC-Esterase:GDSL/SGNH-like Acyl-Esterase family found in Pmr5 and Cas1p)
TRINITY_DN109_c0_g2		208.817	111.133	40.13	64.8033	110.17	84.7733	118.117	77.8667	PREDICTED: 7-deoxyloganetin glucosyltransferase-like [Lupinus angustifolius] >OIV91580.1 hypothetical protein TanjilG_08992 [Lupinus angustifolius]	COG1819(Transferase)	sp|F8WKW1|UGT2_GARJA(7-deoxyloganetin glucosyltransferase OS=Gardenia jasminoides OX=114476 GN=UGT85A24 PE=1 SV=1)	PF00201(UDPGT:UDP-glucoronosyl and UDP-glucosyl transferase)
TRINITY_DN109_c0_g3		58.1533	27.6233	17.1367	29.2433	6.0067	28.43	2.1233	16.1433	PREDICTED: 7-deoxyloganetin glucosyltransferase-like [Lupinus angustifolius] >OIV91580.1 hypothetical protein TanjilG_08992 [Lupinus angustifolius]		sp|F8WKW1|UGT2_GARJA(7-deoxyloganetin glucosyltransferase OS=Gardenia jasminoides OX=114476 GN=UGT85A24 PE=1 SV=1)
TRINITY_DN11008_c0_g1		11.33	5.4267	30.1033	6.6567	5.33	5.9133	22.1433	51.0233	PREDICTED: 1-aminocyclopropane-1-carboxylate oxidase-like [Lupinus angustifolius]	COG3491(This protein is located at the 30S-50S ribosomal subunit interface and may play a role in the structure and function of the aminoacyl-tRNA binding site (By similarity))	sp|Q9MB94|ACCO_PRUMU(1-aminocyclopropane-1-carboxylate oxidase OS=Prunus mume OX=102107 GN=ACO1 PE=2 SV=1)	PF03171(2OG-FeII_Oxy:2OG-Fe(II) oxygenase superfamily); PF14226(DIOX_N:non-haem dioxygenase in morphine synthesis N-terminal)
TRINITY_DN11032_c0_g1		4.4733	11.2633	3.5233	23.8133	0.2867	5.92	0.3367	10.1467
TRINITY_DN11032_c0_g3		10.6267	13.7167	19.82	9.3533	27.33	0.5933	3.7667	48.9767	hypothetical protein MTR_4g023860 [Medicago truncatula]
TRINITY_DN11036_c0_g1		63.07	13.9033	2.16	17.67	33.2533	19.03	39.1667	9.0667	PREDICTED: receptor-like protein kinase ANXUR1 [Lupinus angustifolius] >OIV91998.1 hypothetical protein TanjilG_07737 [Lupinus angustifolius]	COG0515(Serine Threonine protein kinase)	sp|Q9SR05|ANX1_ARATH(Receptor-like protein kinase ANXUR1 OS=Arabidopsis thaliana OX=3702 GN=ANX1 PE=1 SV=1)	PF07714(Pkinase_Tyr:Protein tyrosine kinase); PF00069(Pkinase:Protein kinase domain)
TRINITY_DN11056_c0_g1		0.57	6.79	10.4433	18.8767	6.3167	10.2	4.39	6.5833	PREDICTED: LEAF RUST 10 DISEASE-RESISTANCE LOCUS RECEPTOR-LIKE PROTEIN KINASE-like 2.1 [Lupinus angustifolius]	COG0515(Serine Threonine protein kinase)	sp|P93604|LRK10_WHEAT(Rust resistance kinase Lr10 OS=Triticum aestivum OX=4565 GN=LRK10 PE=2 SV=1)	PF07714(Pkinase_Tyr:Protein tyrosine kinase); PF00069(Pkinase:Protein kinase domain)
TRINITY_DN11058_c0_g1		4.3767	15.03	2.08	10.1967	4.1567	0.98	2.2667	5.1367	PREDICTED: LOB domain-containing protein 41-like [Lupinus angustifolius] >OIV90153.1 hypothetical protein TanjilG_01607 [Lupinus angustifolius]	ENOG410YBK4(atp-dependent rna helicase)	sp|Q9M886|LBD41_ARATH(LOB domain-containing protein 41 OS=Arabidopsis thaliana OX=3702 GN=LBD41 PE=2 SV=1)	PF03195(LOB:Lateral organ boundaries (LOB) domain)
TRINITY_DN1105_c0_g1		3.07	10.99	11.1667	11.78	6.24	13.3267	8.84	22.6333	PREDICTED: soyasaponin III rhamnosyltransferase-like [Lupinus angustifolius] >OIV91565.1 hypothetical protein TanjilG_08977 [Lupinus angustifolius]	COG1819(Serine Threonine protein kinase)	sp|D4Q9Z5|SGT3_SOYBN(Soyasaponin III rhamnosyltransferase OS=Glycine max OX=3847 GN=GmSGT3 PE=1 SV=1)	PF00201(UDPGT:UDP-glucoronosyl and UDP-glucosyl transferase)
TRINITY_DN11064_c0_g1		8.3	2.81	0.37	2.48	1.41	1.79	4.9333	0.5233	PREDICTED: agamous-like MADS-box protein AGL30 isoform X1 [Lupinus angustifolius]	COG5068(Transcription factor)	sp|Q1PFA4|AGL30_ARATH(Agamous-like MADS-box protein AGL30 OS=Arabidopsis thaliana OX=3702 GN=AGL30 PE=1 SV=1)	PF00319(SRF-TF:SRF-type transcription factor (DNA-binding and dimerisation domain)); PF01486(K-box:K-box region)
TRINITY_DN11066_c0_g1		0	0	0	2.7667	4.6833	18.2267	0	0	PREDICTED: C2 and GRAM domain-containing protein At1g03370-like isoform X1 [Lupinus angustifolius] >XP_019425822.1 PREDICTED: C2 and GRAM domain-containing protein At1g03370-like isoform X1 [Lupinus angustifolius] >XP_019425823.1 PREDICTED: C2 and GRAM domain-containing protein At1g03370-like isoform X1 [Lupinus angustifolius] >OIV91874.1 hypothetical protein TanjilG_17866 [Lupinus angustifolius]	ENOG410XS5D(Unc-13 homolog); ENOG410XRQQ(GRAM domain containing)	sp|Q9ZVT9|C2GR1_ARATH(C2 and GRAM domain-containing protein At1g03370 OS=Arabidopsis thaliana OX=3702 GN=At1g03370 PE=2 SV=4)
TRINITY_DN11070_c0_g1		10.2367	15.5867	31.75	31.67	5.9867	57.9433	35.5267	21.4233
TRINITY_DN11091_c0_g1		1.5533	5.3	7.9133	6.4467	3.0733	6.8467	4.3533	5.9267	hypothetical protein TanjilG_18452 [Lupinus angustifolius]	ENOG410XPIR(that it carries out the mismatch recognition step. This protein has a weak ATPase activity (By similarity))	sp|F4ICB6|IBS1_ARATH(Protein IMPAIRED IN BABA-INDUCED STERILITY 1 OS=Arabidopsis thaliana OX=3702 GN=IBS1 PE=3 SV=1)	PF00069(Pkinase:Protein kinase domain); PF07714(Pkinase_Tyr:Protein tyrosine kinase)
TRINITY_DN11095_c0_g1		20.6933	56.2533	103.177	96.1567	37.25	54.7367	55.53	66.6933	PREDICTED: plastocyanin B'/B'' [Lupinus angustifolius] >OIV89238.1 hypothetical protein TanjilG_24388 [Lupinus angustifolius]		sp|P16002|PLAS_PEA(Plastocyanin, chloroplastic OS=Pisum sativum OX=3888 GN=PETE PE=3 SV=1)	PF00127(Copper-bind:Copper binding proteins, plastocyanin/azurin family); PF13473(Cupredoxin_1:Cupredoxin-like domain)
TRINITY_DN110_c1_g1		0	1.0467	1.2733	0.0167	2.0567	2.4633	0	0	PREDICTED: uncharacterized protein LOC109347276 [Lupinus angustifolius] >OIW12388.1 hypothetical protein TanjilG_04137 [Lupinus angustifolius]
TRINITY_DN11102_c0_g1		2.03	0.89	7.3667	16.6067	8.2933	5.11	0.57	8.0133	PREDICTED: UDP-glycosyltransferase 708D1-like [Lupinus angustifolius] >OIW22006.1 hypothetical protein TanjilG_28624 [Lupinus angustifolius]	COG1819(Transferase)	sp|I1L3T1|708D1_SOYBN(UDP-glycosyltransferase 708D1 OS=Glycine max OX=3847 GN=UGT708D1 PE=1 SV=1)	PF00201(UDPGT:UDP-glucoronosyl and UDP-glucosyl transferase)
TRINITY_DN11104_c0_g1		7.15	1.8167	0.5467	0.7633	1.58	1.2267	3.7967	0.9267	hypothetical protein TanjilG_25644 [Lupinus angustifolius]	ENOG410YWEU(-)
TRINITY_DN1110_c0_g1		87.3433	28.2867	5.0133	31.05	49.4367	24.06	69.8467	18.8133	PREDICTED: receptor-like protein kinase ANXUR1 [Lupinus angustifolius] >OIW20885.1 hypothetical protein TanjilG_24963 [Lupinus angustifolius]	COG0515(Serine Threonine protein kinase)	sp|Q3E8W4|ANX2_ARATH(Receptor-like protein kinase ANXUR2 OS=Arabidopsis thaliana OX=3702 GN=ANX2 PE=1 SV=1)	PF00069(Pkinase:Protein kinase domain); PF07714(Pkinase_Tyr:Protein tyrosine kinase); PF12819(Malectin_like:Malectin-like domain); PF11721(Malectin:Malectin domain)
TRINITY_DN11114_c0_g1		4.2433	15.4633	12.4633	8.5733	9.8867	47.7233	12.8367	13.62
TRINITY_DN11122_c0_g1		210.397	58.89	10.4833	69.68	110.74	61.1567	152.92	37.7167	PREDICTED: proline dehydrogenase 2, mitochondrial-like [Lupinus angustifolius] >OIW17300.1 hypothetical protein TanjilG_22412 [Lupinus angustifolius]	COG0506(Proline dehydrogenase)	sp|Q6NKX1|PROD2_ARATH(Proline dehydrogenase 2, mitochondrial OS=Arabidopsis thaliana OX=3702 GN=POX2 PE=2 SV=1)	PF01619(Pro_dh:Proline dehydrogenase)
TRINITY_DN11127_c0_g1		2.85	1.05	16.01	3.7167	2.6367	27.6567	2.1567	17.22	PREDICTED: cytochrome P450 71D10-like [Lupinus angustifolius]	COG2124(Serine Threonine protein kinase)	sp|O48923|C71DA_SOYBN(Cytochrome P450 71D10 OS=Glycine max OX=3847 GN=CYP71D10 PE=2 SV=1)	PF00067(p450:Cytochrome P450)
TRINITY_DN11130_c0_g1		6.3633	3.8033	2.7133	2.8733	1.4533	3.3167	5.0533	4.6633	PREDICTED: LEAF RUST 10 DISEASE-RESISTANCE LOCUS RECEPTOR-LIKE PROTEIN KINASE-like 1.2 isoform X1 [Lupinus angustifolius]	COG0515(Serine Threonine protein kinase)	sp|Q9C6K9|LRL11_ARATH(LEAF RUST 10 DISEASE-RESISTANCE LOCUS RECEPTOR-LIKE PROTEIN KINASE-like 1.1 OS=Arabidopsis thaliana OX=3702 GN=LRK10L-1.1 PE=2 SV=1)	PF00069(Pkinase:Protein kinase domain); PF07714(Pkinase_Tyr:Protein tyrosine kinase)
TRINITY_DN11133_c0_g1		8.4167	0	22.1667	4.69	1.98	0.2733	11.7333	27.09	PREDICTED: cytochrome P450 71A26-like [Lupinus angustifolius]	COG2124(GTPase that associates with the 50S ribosomal subunit and may have a role during protein synthesis or ribosome biogenesis (By similarity))	sp|P37119|C71A3_SOLME(Cytochrome P450 71A3 (Fragment) OS=Solanum melongena OX=4111 GN=CYP71A3 PE=2 SV=1)	PF00067(p450:Cytochrome P450)
TRINITY_DN11140_c0_g1		372.437	152.607	124.743	161.63	362.47	19.5467	156.63	107.677	PREDICTED: GDSL esterase/lipase At2g42990-like [Lupinus angustifolius] >OIW02755.1 hypothetical protein TanjilG_29531 [Lupinus angustifolius]	COG3240(GDSL esterase lipase)	sp|Q67ZI9|GDL48_ARATH(GDSL esterase/lipase At2g42990 OS=Arabidopsis thaliana OX=3702 GN=At2g42990 PE=2 SV=1)	PF00657(Lipase_GDSL:GDSL-like Lipase/Acylhydrolase)
TRINITY_DN11141_c0_g6		0	0.3933	0.15	0.3967	0	2.1033	0	0	hypothetical protein TSUD_278410 [Trifolium subterraneum]			PF14111(DUF4283:Domain of unknown function (DUF4283))
TRINITY_DN11147_c0_g1		82.01	37.8	18.4967	43.9533	60.97	26.2033	35.1133	55.5	PREDICTED: 4-diphosphocytidyl-2-C-methyl-D-erythritol kinase, chloroplastic-like [Lupinus angustifolius]	COG1947(Catalyzes the phosphorylation of the position 2 hydroxy group of 4-diphosphocytidyl-2C-methyl-D-erythritol (By similarity))	sp|P93841|ISPE_SOLLC(4-diphosphocytidyl-2-C-methyl-D-erythritol kinase, chloroplastic/chromoplastic (Fragment) OS=Solanum lycopersicum OX=4081 GN=ISPE PE=1 SV=1)
TRINITY_DN11149_c0_g1		0.2467	2.3767	1.9433	0.9567	1.46	0	1.79	1.3433	hypothetical protein TanjilG_06779 [Lupinus angustifolius]	ENOG410XPSD(GCN1 general control of amino-acid synthesis 1-like 1 (Yeast))
TRINITY_DN11156_c0_g1		0	6.01	3.9033	1.5167	1.11	0	2.74	10.5167
TRINITY_DN11157_c0_g1		52.7533	8.51	0.6667	10.1433	21.9467	6.15	55.4967	4.4833	hypothetical protein TanjilG_05723 [Lupinus angustifolius]
TRINITY_DN11158_c0_g1		4.4667	14.02	0	1.07	1.3	5.5533	3.7933	1.6833
TRINITY_DN1116_c0_g2		1.18	1.9	0.4267	1.4767	1.21	1.1967	1.5133	1.0467	hypothetical protein TanjilG_21824 [Lupinus angustifolius]	ENOG4111N2T(ranBP2-type zinc finger protein)	sp|Q8GZ43|YZR3_ARATH(RanBP2-type zinc finger protein At1g67325 OS=Arabidopsis thaliana OX=3702 GN=At1g67325 PE=1 SV=1)	PF00641(zf-RanBP:Zn-finger in Ran binding protein and others); PF10497(zf-4CXXC_R1:Zinc-finger domain of monoamine-oxidase A repressor R1)
TRINITY_DN1119_c3_g1		60.67	16.33	3.9467	20.72	26.34	16.7733	42.7067	12.2467	PREDICTED: probable serine/threonine-protein kinase PBL7 [Lupinus angustifolius] >XP_019434928.1 PREDICTED: probable serine/threonine-protein kinase PBL7 [Lupinus angustifolius] >XP_019437095.1 PREDICTED: probable serine/threonine-protein kinase PBL7 [Lupinus angustifolius]	COG0515(ERI1 exoribonuclease family member)	sp|Q1PDV6|PBL27_ARATH(Serine/threonine-protein kinase PBL27 OS=Arabidopsis thaliana OX=3702 GN=PBL27 PE=1 SV=1)
TRINITY_DN11200_c0_g1		3.8433	3.6467	6.4567	3.9733	4.4333	2.1767	129.33	29.13	PREDICTED: UDP-glycosyltransferase 83A1-like [Lupinus angustifolius] >XP_019428909.1 PREDICTED: UDP-glycosyltransferase 83A1-like [Lupinus angustifolius]	COG1819(Transferase)	sp|Q9SGA8|U83A1_ARATH(UDP-glycosyltransferase 83A1 OS=Arabidopsis thaliana OX=3702 GN=UGT83A1 PE=2 SV=1)	PF00201(UDPGT:UDP-glucoronosyl and UDP-glucosyl transferase)
TRINITY_DN11226_c0_g1		5.9067	1.9467	0.2067	2.6067	3.3733	1.08	4.9133	1.19	PREDICTED: probable transcription factor At5g28040 [Lupinus angustifolius] >OIW07142.1 hypothetical protein TanjilG_10115 [Lupinus angustifolius]	ENOG410YGHJ(auxin-induced protein)	sp|F4K5T4|STKLU_ARATH(Probable transcription factor At5g28040 OS=Arabidopsis thaliana OX=3702 GN=At5g28040 PE=1 SV=1)	PF04504(DUF573:Protein of unknown function, DUF573)
TRINITY_DN11233_c0_g2		1.2533	1.3067	0.99	0.64	1.3133	0.11	0.0133	0.89	hypothetical protein TSUD_130870 [Trifolium subterraneum]	COG0133(The beta subunit is responsible for the synthesis of L- tryptophan from indole and L-serine (By similarity))	sp|O50046|TRPB_CAMAC(Tryptophan synthase beta chain 2, chloroplastic OS=Camptotheca acuminata OX=16922 GN=TSB PE=2 SV=1)	PF00291(PALP:Pyridoxal-phosphate dependent enzyme)
TRINITY_DN11234_c0_g2		0.27	0.5633	0.3033	0.24	0.22	0.0733	0.22	0.29
TRINITY_DN11236_c0_g1		48.2533	24.0033	50.8667	27.71	6.9267	41.92	39.4833	21.31	PREDICTED: peptide methionine sulfoxide reductase-like [Lupinus angustifolius] >OIW21853.1 hypothetical protein TanjilG_13722 [Lupinus angustifolius]	COG0225(Has an important function as a repair enzyme for proteins that have been inactivated by oxidation. Catalyzes the reversible oxidation-reduction of methionine sulfoxide in proteins to methionine (By similarity))	sp|P54152|MSRA_FRAAN(Peptide methionine sulfoxide reductase OS=Fragaria ananassa OX=3747 PE=2 SV=2)	PF01625(PMSR:Peptide methionine sulfoxide reductase)
TRINITY_DN1123_c0_g1		1.0667	1.8333	3.9367	5.8267	2.4933	3.2333	1.03	6.9533	hypothetical protein TSUD_388800 [Trifolium subterraneum]	ENOG410YADE(Reverse transcriptase (RNA-dependent DNA polymerase)); ENOG4111K5V(Reverse transcriptase (RNA-dependent DNA polymerase)); ENOG410Y65V(Retrotransposon protein)	sp|P08548|LIN1_NYCCO(LINE-1 reverse transcriptase homolog OS=Nycticebus coucang OX=9470 PE=4 SV=1)	PF00078(RVT_1:Reverse transcriptase (RNA-dependent DNA polymerase)); PF13966(zf-RVT:zinc-binding in reverse transcriptase); PF03372(Exo_endo_phos:Endonuclease/Exonuclease/phosphatase family)
TRINITY_DN11244_c0_g1		13.7633	14.3533	8.9267	14.3	7.8667	11.41	2.83	10.0667	PREDICTED: aldehyde dehydrogenase family 2 member C4-like [Lupinus angustifolius] >OIW15994.1 hypothetical protein TanjilG_04529 [Lupinus angustifolius]	COG1012(Dehydrogenase)	sp|Q56YU0|AL2C4_ARATH(Aldehyde dehydrogenase family 2 member C4 OS=Arabidopsis thaliana OX=3702 GN=ALDH2C4 PE=1 SV=2)	PF00171(Aldedh:Aldehyde dehydrogenase family)
TRINITY_DN11251_c2_g1		2.88	10.4133	42.0867	15.2333	11.64	25.61	18.9667	49.43	PREDICTED: ethylene-responsive transcription factor RAP2-3-like [Lupinus angustifolius] >OIV95904.1 hypothetical protein TanjilG_27008 [Lupinus angustifolius]	ENOG41113EY(Transcription factor)	sp|P42736|RAP23_ARATH(Ethylene-responsive transcription factor RAP2-3 OS=Arabidopsis thaliana OX=3702 GN=RAP2-3 PE=1 SV=2)	PF00847(AP2:AP2 domain)
TRINITY_DN11259_c0_g1		9.13	2.9033	1.2867	2.3333	3.5567	1.8633	9.5833	2.3133	PREDICTED: probable methyltransferase PMT26 isoform X4 [Lupinus angustifolius]	ENOG410Y2C5(Methyltransferase)	sp|Q6NPR7|PMTO_ARATH(Probable methyltransferase PMT24 OS=Arabidopsis thaliana OX=3702 GN=At1g29470 PE=2 SV=1)	PF03141(Methyltransf_29:Putative S-adenosyl-L-methionine-dependent methyltransferase)
TRINITY_DN11262_c0_g1		1.3967	4.2967	7.73	5.6633	2.82	4.4167	4.4967	5.47	hypothetical protein TanjilG_29295 [Lupinus angustifolius]	ENOG411019B(ribosomal protein, L45)
TRINITY_DN11271_c0_g1		2.5033	1.3533	10.9833	0.7733	0	7.1567	8.3633	3.2233	hypothetical protein TanjilG_29255 [Lupinus angustifolius]	COG5269(Transmembrane protein 14A); ENOG4111X77(Myb transcription factor)	sp|Q6R0H1|LHY_ARATH(Protein LHY OS=Arabidopsis thaliana OX=3702 GN=LHY PE=1 SV=2)
TRINITY_DN11279_c0_g2		0.83	2.27	2.47	1.23	2.3333	0	4.7867	1.8	PREDICTED: probable disease resistance protein At4g27220 isoform X3 [Lupinus angustifolius]	COG4886(leucine Rich Repeat)
TRINITY_DN1127_c1_g1		5.38	6.08	5.8967	5.0033	9.14	1.3333	8.3133	8.0667	zinc finger CCCH domain-containing protein 17-like [Abrus precatorius]	ENOG410XRWX(F-box and WD repeat domain containing 7, E3 ubiquitin protein ligase); COG2319(wd repeat)	sp|Q9FNZ2|C3H48_ARATH(Zinc finger CCCH domain-containing protein 48 OS=Arabidopsis thaliana OX=3702 GN=ZFWD1 PE=2 SV=1)	PF00400(WD40:WD domain, G-beta repeat); PF18345(zf_CCCH_4:Zinc finger domain)
TRINITY_DN11287_c0_g2		24.5933	61.0267	125.237	62.86	31.22	75.1333	45.6233	62.7633	PREDICTED: photosystem II reaction center W protein, chloroplastic-like [Lupinus angustifolius] >OIW12633.1 hypothetical protein TanjilG_24566 [Lupinus angustifolius]	ENOG410XZ0Y(photosystem ii reaction center w)	sp|Q39194|PSBW_ARATH(Photosystem II reaction center W protein, chloroplastic OS=Arabidopsis thaliana OX=3702 GN=PSBW PE=1 SV=2)	PF07123(PsbW:Photosystem II reaction centre W protein (PsbW))
TRINITY_DN11296_c0_g1		62.23	95.96	25.4	12.33	16.6633	1.9333	348.533	62.3367	PREDICTED: putative cell wall protein [Lupinus angustifolius] >OIW06030.1 hypothetical protein TanjilG_11717 [Lupinus angustifolius]
TRINITY_DN11299_c0_g1		1.6867	5.9467	9.3367	5.1933	2.15	7.3867	6.0967	5.2933	PREDICTED: protein STAY-GREEN LIKE, chloroplastic [Lupinus angustifolius]	ENOG4111UAI(Senescence-inducible chloroplast stay-green protein)	sp|Q94AQ9|SGRL_ARATH(Protein STAY-GREEN LIKE, chloroplastic OS=Arabidopsis thaliana OX=3702 GN=SGRL PE=2 SV=1)	PF12638(Staygreen:Staygreen protein)
TRINITY_DN11302_c1_g1		0.08	0.4667	2.6367	3.57	1.0867	0.4167	1.1867	0.2567	eukaryotic translation initiation factor 3 subunit B [Arachis ipaensis] >XP_025683981.1 eukaryotic translation initiation factor 3 subunit B [Arachis hypogaea] >RYQ85140.1 hypothetical protein Ahy_B10g104643 [Arachis hypogaea]	COG5354(Component of the eukaryotic translation initiation factor 3 (eIF-3) complex, which is involved in protein synthesis and, together with other initiation factors, stimulates binding of mRNA and methionyl-tRNAi to the 40S ribosome (By similarity))	sp|P56821|EIF3B_TOBAC(Eukaryotic translation initiation factor 3 subunit B OS=Nicotiana tabacum OX=4097 GN=TIF3B1 PE=2 SV=1)	PF08662(eIF2A:Eukaryotic translation initiation factor eIF2A)
TRINITY_DN11310_c0_g1		1.16	0.39	0.0533	0.1333	0.57	0.3233	1.62	0.1333	PREDICTED: mitogen-activated protein kinase 9-like isoform X1 [Lupinus angustifolius]	ENOG410XNY0(Mitogen-activated protein kinase)	sp|Q9LM33|MPK8_ARATH(Mitogen-activated protein kinase 8 OS=Arabidopsis thaliana OX=3702 GN=MPK8 PE=1 SV=2)	PF00069(Pkinase:Protein kinase domain); PF07714(Pkinase_Tyr:Protein tyrosine kinase); PF06293(Kdo:Lipopolysaccharide kinase (Kdo/WaaP) family); PF12330(Haspin_kinase:Haspin like kinase domain)
TRINITY_DN11313_c0_g1		3.07	0.6533	0.08	0.6367	0.6967	0.4133	6.6767	0.45	PREDICTED: translocator protein homolog [Lupinus angustifolius]	ENOG410YY8X(TspO/MBR family)	sp|O82245|TSPO_ARATH(Translocator protein homolog OS=Arabidopsis thaliana OX=3702 GN=TSPO PE=1 SV=1)	PF03073(TspO_MBR:TspO/MBR family)
TRINITY_DN11314_c0_g1		33.2933	25.96	40.9933	19.2867	7.68	7.64	24.43	34.3867	PREDICTED: 30S ribosomal protein S1, chloroplastic-like isoform X4 [Lupinus angustifolius]
TRINITY_DN11318_c0_g1		0.2067	1.0167	4.53	1.34	1.0433	2.6933	0.8933	1.2933	PREDICTED: uncharacterized protein LOC109353438 isoform X2 [Lupinus angustifolius]	ENOG410XZNN(Mate efflux family protein)		PF07939(DUF1685:Protein of unknown function (DUF1685))
TRINITY_DN11329_c0_g1		0.1233	0.67	0.7167	0.4667	0.42	0.4733	0.5333	0.5067	PREDICTED: serine/threonine-protein kinase ATR [Lupinus angustifolius] >XP_019441708.1 PREDICTED: serine/threonine-protein kinase ATR [Lupinus angustifolius] >OIW12744.1 hypothetical protein TanjilG_24677 [Lupinus angustifolius]	COG5032(NADH dehydrogenase (ubiquinone) complex I, assembly factor 3)	sp|Q9FKS4|ATR_ARATH(Serine/threonine-protein kinase ATR OS=Arabidopsis thaliana OX=3702 GN=ATR PE=2 SV=2)	PF02259(FAT:FAT domain); PF00454(PI3_PI4_kinase:Phosphatidylinositol 3- and 4-kinase); PF08064(UME:UME (NUC010) domain); PF02260(FATC:FATC domain)
TRINITY_DN1132_c0_g1		297.24	150.277	195.087	105.19	321.95	368.523	285.697	838.257	hypothetical protein TanjilG_10623 [Lupinus angustifolius]	ENOG410YX3Q(Plant non-specific lipid-transfer proteins transfer phospholipids as well as galactolipids across membranes. May play a role in wax or cutin deposition in the cell walls of expanding epidermal cells and certain secretory tissues (By similarity)); ENOG410YWBC(Plant non-specific lipid-transfer proteins transfer phospholipids as well as galactolipids across membranes. May play a role in …	sp|Q9M5X7|NLTP_MALDO(Non-specific lipid-transfer protein OS=Malus domestica OX=3750 GN=MALD3 PE=1 SV=1)	PF00234(Tryp_alpha_amyl:Protease inhibitor/seed storage/LTP family); PF14368(LTP_2:Probable lipid transfer)
TRINITY_DN1132_c1_g1		7.4033	6.4333	11.8933	20.5867	17.4467	32.4733	6.5933	6.6533	PREDICTED: non-specific lipid-transfer protein 1-like isoform X1 [Lupinus angustifolius] >XP_019446662.1 PREDICTED: non-specific lipid-transfer protein 1-like isoform X2 [Lupinus angustifolius] >XP_019446679.1 PREDICTED: non-specific lipid-transfer protein 1-like isoform X2 [Lupinus angustifolius] >XP_019446711.1 PREDICTED: non-specific lipid-transfer protein 1-like [Lupinus angustifolius] >XP_01…	ENOG410YX3Q(Plant non-specific lipid-transfer proteins transfer phospholipids as well as galactolipids across membranes. May play a role in wax or cutin deposition in the cell walls of expanding epidermal cells and certain secretory tissues (By similarity)); ENOG410YWBC(Plant non-specific lipid-transfer proteins transfer phospholipids as well as galactolipids across membranes. May play a role in …	sp|Q43017|NLTP1_PRUDU(Non-specific lipid-transfer protein 1 OS=Prunus dulcis OX=3755 PE=3 SV=1)	PF00234(Tryp_alpha_amyl:Protease inhibitor/seed storage/LTP family)
TRINITY_DN11334_c0_g1		60.7967	42.8733	20.83	22.1633	37.2933	39.39	10.08	35.8333	PREDICTED: protein DETOXIFICATION 16-like [Lupinus angustifolius]	COG0534(Mate efflux family protein)	sp|Q9FHB6|DTX16_ARATH(Protein DETOXIFICATION 16 OS=Arabidopsis thaliana OX=3702 GN=DTX16 PE=2 SV=1)	PF01554(MatE:MatE)
TRINITY_DN11340_c0_g1		0.39	1.75	6.6333	2.48	0.65	3.0533	1.17	1.2867	hypothetical protein TanjilG_16592 [Lupinus angustifolius]	ENOG410Z2UE(homeobox-leucine zipper protein)	sp|Q8LC03|ATB13_ARATH(Homeobox-leucine zipper protein ATHB-13 OS=Arabidopsis thaliana OX=3702 GN=ATHB-13 PE=2 SV=2)	PF00046(Homeodomain:Homeodomain); PF02183(HALZ:Homeobox associated leucine zipper); PF05920(Homeobox_KN:Homeobox KN domain)
TRINITY_DN11345_c0_g1		0.52	0.7067	0.2867	0.34	0.4933	3.1333	0.6433	0.8667	putative ribonuclease H-like domain-containing protein [Helianthus annuus]	ENOG410XS4D(Retrotransposon protein)	sp|Q94HW2|POLR1_ARATH(Retrovirus-related Pol polyprotein from transposon RE1 OS=Arabidopsis thaliana OX=3702 GN=RE1 PE=2 SV=1)	PF07727(RVT_2:Reverse transcriptase (RNA-dependent DNA polymerase)); PF00665(rve:Integrase core domain); PF13976(gag_pre-integrs:GAG-pre-integrase domain)
TRINITY_DN11347_c0_g1		1.4833	1.16	0.7	1.7267	1.41	1.22	5.41	5.6733	PREDICTED: uncharacterized protein LOC109363370 [Lupinus angustifolius]	ENOG410YH1N(PAR1 protein)		PF06521(PAR1:PAR1 protein)
TRINITY_DN11355_c0_g2		9.2833	8.08	16.6667	4.7333	14.2667	0	7.5867	8.33	PREDICTED: uncharacterized protein LOC109350259 [Lupinus angustifolius] >OIW09554.1 hypothetical protein TanjilG_28153 [Lupinus angustifolius]	ENOG410ZXXW(cell cycle checkpoint protein)
TRINITY_DN1135_c0_g1		16.5467	36.5433	26.5967	17.06	4.02	35.1467	3.8167	16.4067	PREDICTED: probably inactive leucine-rich repeat receptor-like protein kinase At2g25790 [Lupinus angustifolius]	COG4886(leucine Rich Repeat)	sp|Q6JN46|EIX2_SOLLC(Receptor-like protein EIX2 OS=Solanum lycopersicum OX=4081 GN=EIX2 PE=1 SV=2)	PF13855(LRR_8:Leucine rich repeat); PF12799(LRR_4:Leucine Rich repeats (2 copies)); PF08263(LRRNT_2:Leucine rich repeat N-terminal domain)
TRINITY_DN11366_c0_g1		3.47	0.45	0.07	0.7333	0.6167	0.2333	3.4067	0.34	PREDICTED: uncharacterized protein LOC109341728 [Lupinus angustifolius] >OIV89110.1 hypothetical protein TanjilG_27432 [Lupinus angustifolius]	ENOG4111URZ(-)		PF04398(DUF538:Protein of unknown function, DUF538)
TRINITY_DN11369_c0_g2		2.4033	1.5467	4.27	1.3467	1.1233	0.6467	3.2133	4.9533	PREDICTED: linoleate 13S-lipoxygenase 2-1, chloroplastic-like [Lupinus angustifolius] >XP_019448556.1 PREDICTED: linoleate 13S-lipoxygenase 2-1, chloroplastic-like [Lupinus angustifolius] >OIW08664.1 hypothetical protein TanjilG_03340 [Lupinus angustifolius]	ENOG410YN4N(Plant lipoxygenase may be involved in a number of diverse aspects of plant physiology including growth and development, pest resistance, and senescence or responses to wounding (By similarity))	sp|O24370|LOX21_SOLTU(Linoleate 13S-lipoxygenase 2-1, chloroplastic OS=Solanum tuberosum OX=4113 GN=LOX2.1 PE=1 SV=1)	PF00305(Lipoxygenase:Lipoxygenase); PF01477(PLAT:PLAT/LH2 domain)
TRINITY_DN11371_c0_g1		1.0367	0.8	0.8867	1.7567	0	3.3833	0.19	0.08
TRINITY_DN11391_c0_g1		1.14	0.3067	0.8333	3.8033	0.38	1.93	4.2767	0.2267	ADP-ribosylation factor 1-like 2 [Prunus persica] >XP_021805391.1 ADP-ribosylation factor 1-like 2 [Prunus avium] >ONI25881.1 hypothetical protein PRUPE_2G324600 [Prunus persica] >ONI25882.1 hypothetical protein PRUPE_2G324600 [Prunus persica]	COG1100(Zinc finger CCCH-type with G patch)		PF00025(Arf:ADP-ribosylation factor family)
TRINITY_DN11393_c0_g1		1.7767	2.9367	9.0933	0	2.0267	0	0	6.1733
TRINITY_DN11394_c0_g1		0.28	1.39	4.0133	1.4733	1.5567	0.3733	1.3167	0.4067	PREDICTED: receptor-like protein 12 isoform X3 [Lupinus angustifolius]	COG4886(leucine Rich Repeat)	sp|Q6JN47|EIX1_SOLLC(Receptor-like protein EIX1 OS=Solanum lycopersicum OX=4081 GN=EIX1 PE=2 SV=2)	PF08263(LRRNT_2:Leucine rich repeat N-terminal domain); PF13855(LRR_8:Leucine rich repeat); PF12799(LRR_4:Leucine Rich repeats (2 copies))
TRINITY_DN11396_c1_g1		2.1667	1.2967	0.4967	1.1633	3.7467	6.4033	1.28	1.0667	Retrovirus-related Pol polyprotein LINE-1 [Cajanus cajan]	ENOG410Y42B(-)
TRINITY_DN11405_c0_g1		0.4533	0.6	1.5467	0.8967	0.8067	0.05	1.79	0.4	hypothetical protein Ahy_A08g040920 isoform A [Arachis hypogaea]	ENOG41116U9(Proline-rich protein)	sp|P14009|14KD_DAUCA(14 kDa proline-rich protein DC2.15 OS=Daucus carota OX=4039 PE=2 SV=1)	PF14547(Hydrophob_seed:Hydrophobic seed protein); PF14368(LTP_2:Probable lipid transfer); PF00234(Tryp_alpha_amyl:Protease inhibitor/seed storage/LTP family)
TRINITY_DN11406_c0_g1		4.5767	3.7633	0.2467	2.5467	0	2.5667	1.4167	0	hypothetical protein TanjilG_28449 [Lupinus angustifolius]	ENOG410XQ92(ubiquitin carboxyl-terminal hydrolase)	sp|Q9SB51|UBP16_ARATH(Ubiquitin carboxyl-terminal hydrolase 16 OS=Arabidopsis thaliana OX=3702 GN=UBP16 PE=1 SV=1)
TRINITY_DN11409_c0_g1		132.51	22.7533	14.2033	85.3	50.7367	45.2067	95.0267	35.2767	PREDICTED: ATPase 8, plasma membrane-type-like [Lupinus angustifolius] >OIW19507.1 hypothetical protein TanjilG_06962 [Lupinus angustifolius]	COG0474(P-type atpase)	sp|P83970|PMA1_WHEAT(Plasma membrane ATPase OS=Triticum aestivum OX=4565 GN=ha1 PE=2 SV=1)
TRINITY_DN11410_c0_g1		17.1167	3.7933	6.4567	6.5967	6.2933	15.93	0.53	9.1633	hypothetical protein TanjilG_24268 [Lupinus angustifolius]	ENOG410YCKV(function DUF1296 domain containing protein, expressed)
TRINITY_DN11411_c0_g1		0.5567	3.8133	5.34	6.9867	3.3867	7.93	1.6633	1.9933	uncharacterized protein LOC113863748 [Abrus precatorius]	ENOG410ZEYA(DVL family)		PF08137(DVL:DVL family)
TRINITY_DN11412_c0_g1		10.7033	6.86	10.85	2.4633	11.48	16.05	7.0667	18.4467	PREDICTED: puromycin-sensitive aminopeptidase-like isoform X1 [Lupinus angustifolius]		sp|Q8H0S9|PSA_ARATH(Puromycin-sensitive aminopeptidase OS=Arabidopsis thaliana OX=3702 GN=MPA1 PE=2 SV=1)	PF01433(Peptidase_M1:Peptidase family M1 domain)
TRINITY_DN11419_c0_g2		0.0667	0.02	0.2433	7.2433	0	0.0867	0.2467	0.32
TRINITY_DN1141_c0_g1		161.307	420.017	260.94	321.607	858.72	489.67	65.11	753.083	hypothetical protein TanjilG_21224 [Lupinus angustifolius]
TRINITY_DN11425_c0_g1		1.2767	4.89	4.9167	3.9633	0.8233	2.1667	2.59	3.7667	PREDICTED: probable protein ABIL5 [Lupinus angustifolius]	ENOG410YW15(-); ENOG410YZ7R(-)	sp|Q5JMF2|ABIL5_ORYSJ(Probable protein ABIL5 OS=Oryza sativa subsp. japonica OX=39947 GN=Os01g0760900 PE=2 SV=1)
TRINITY_DN11433_c0_g1		86.67	32.4633	28.92	41.5733	37.0867	51.42	102.307	67.34	PREDICTED: expansin-A8-like [Lupinus angustifolius] >OIV98066.1 hypothetical protein TanjilG_09559 [Lupinus angustifolius]	ENOG410YCRV(loosening and extension of plant cell walls by disrupting non-covalent bonding between cellulose microfibrils and matrix glucans. No enzymatic activity has been found)	sp|O22874|EXPA8_ARATH(Expansin-A8 OS=Arabidopsis thaliana OX=3702 GN=EXPA8 PE=2 SV=1)	PF01357(Pollen_allerg_1:Pollen allergen); PF03330(DPBB_1:Lytic transglycolase)
TRINITY_DN1143_c0_g2		0.31	0.9267	2.6133	0.4333	0.4433	0.73	0.8933	1.36	PREDICTED: protein SMG7L-like isoform X7 [Lupinus angustifolius]	ENOG410ZUHD(Telomerase activating protein Est1)	sp|Q9FZ99|SMG7L_ARATH(Protein SMG7L OS=Arabidopsis thaliana OX=3702 GN=SMG7L PE=2 SV=1)	PF10373(EST1_DNA_bind:Est1 DNA/RNA binding domain); PF10374(EST1:Telomerase activating protein Est1)
TRINITY_DN11440_c0_g1		14.11	12.23	18.5967	8.61	43.3767	5.3533	6.44	22.23
TRINITY_DN11442_c0_g1		0.13	1.1667	2.8467	2.67	0.9233	1.7567	1.4233	1.4267	PREDICTED: uncharacterized protein At4g00950-like [Lupinus angustifolius]	ENOG41116TU(-)		PF05097(DUF688:Protein of unknown function (DUF688))
TRINITY_DN11449_c0_g1		4.0067	5.12	20.7867	13.5533	3.5	22.19	15.56	31.81	PREDICTED: class I heat shock protein-like [Lupinus angustifolius] >OIW04080.1 hypothetical protein TanjilG_00640 [Lupinus angustifolius]	COG0071(response to heat)	sp|P04793|HSP13_SOYBN(17.5 kDa class I heat shock protein OS=Glycine max OX=3847 GN=HSP17.5-M PE=3 SV=1)	PF00011(HSP20:Hsp20/alpha crystallin family); PF17886(ArsA_HSP20:HSP20-like domain found in ArsA)
TRINITY_DN11450_c0_g1		4.08	0.4033	0.89	1.0567	1.0767	0.91	1.51	0.3	PREDICTED: uncharacterized protein LOC109335321 [Lupinus angustifolius] >OIV90064.1 hypothetical protein TanjilG_01518 [Lupinus angustifolius]	ENOG410YUR2(expressed protein)
TRINITY_DN11452_c0_g1		0.2133	1.1567	1.9367	1.7133	0.85	0.9633	0.57	1.1067	PREDICTED: formin-like protein 1 [Lupinus angustifolius]	ENOG410XQR0(inverted formin, FH2 and WH2 domain containing); ENOG411011I(FH2)
TRINITY_DN11473_c0_g1		2.3833	0.4233	0	2.56	0	6.3267	1.7567	2.8433
TRINITY_DN11473_c0_g2		3.6267	2.9233	0	3.6467	1.49	4.26	0.6733	1.5467	hypothetical protein TanjilG_09196 [Lupinus angustifolius]	ENOG410XQV8(meprin and TRAF homology domain-containing protein MATH domain-containing protein)	sp|Q9XHZ8|Y1178_ARATH(BTB/POZ domain-containing protein At1g21780 OS=Arabidopsis thaliana OX=3702 GN=At1g21780 PE=1 SV=1)
TRINITY_DN11476_c0_g1		4.3033	10.6367	0.3433	2.9733	2.1467	1.1	4.6967	0.67
TRINITY_DN11477_c0_g1		26.3767	13.9967	41.3433	37.5867	14.7033	0.27	17.2433	25.6433
TRINITY_DN11478_c0_g2		1.28	2.8567	6.0167	3.7533	3.2633	0	2.9	1.2067
TRINITY_DN11480_c0_g1		1.7933	1.1633	11.16	1.6467	1.23	7.2	3.53	4.0967	PREDICTED: probable alpha,alpha-trehalose-phosphate synthase [UDP-forming] 11 [Lupinus angustifolius] >OIV99822.1 hypothetical protein TanjilG_26160 [Lupinus angustifolius]	COG1877(trehalose biosynthetic process)	sp|Q9LRA7|TPS9_ARATH(Probable alpha,alpha-trehalose-phosphate synthase [UDP-forming] 9 OS=Arabidopsis thaliana OX=3702 GN=TPS9 PE=2 SV=1)	PF02358(Trehalose_PPase:Trehalose-phosphatase); PF08282(Hydrolase_3:haloacid dehalogenase-like hydrolase); PF05116(S6PP:Sucrose-6F-phosphate phosphohydrolase)
TRINITY_DN11486_c0_g2		10.3867	0	3.9067	5.6933	5.82	0	3.6833	8.9133	hypothetical protein TanjilG_27263 [Lupinus angustifolius]	ENOG410YC9K(Protein of unknown function (DUF3741))
TRINITY_DN11490_c1_g1		4.08	5.4867	8.5733	4.85	3.2733	8.0333	1.09	6.3133
TRINITY_DN11490_c1_g2		4.65	0	0	0	0.39	9.2833	0.1333	0
TRINITY_DN11493_c0_g1		5.0533	1.44	8.4833	6.2333	5.26	3.6133	5.0933	0	PREDICTED: probable serine/threonine-protein kinase PBL7 isoform X1 [Lupinus angustifolius] >OIW13942.1 hypothetical protein TanjilG_09293 [Lupinus angustifolius]	COG0515(Serine Threonine protein kinase)	sp|Q1PDV6|PBL27_ARATH(Serine/threonine-protein kinase PBL27 OS=Arabidopsis thaliana OX=3702 GN=PBL27 PE=1 SV=1)
TRINITY_DN11512_c0_g1		78.8633	24.75	1.9	22.36	35.2667	18.6933	65.5033	9.4	hypothetical protein GLYMA_02G157100 [Glycine max] >RZC25183.1 hypothetical protein D0Y65_004050 [Glycine soja]
TRINITY_DN11519_c0_g1		6.8233	2.8133	0.4733	2.4833	3.2	2.02	5.1133	1.9	PREDICTED: uncharacterized protein LOC109336579 isoform X1 [Lupinus angustifolius] >XP_019428815.1 PREDICTED: uncharacterized protein LOC109336579 isoform X1 [Lupinus angustifolius]	ENOG410YTUI(-)
TRINITY_DN11519_c0_g2		1.0033	0.2233	0.08	0.2467	0.22	0.15	0.67	0.1667	hypothetical protein TanjilG_02412 [Lupinus angustifolius]
TRINITY_DN11524_c0_g1		1.26	5.06	12.9833	10.2933	4.7433	8.8067	6.58	6.0267	PREDICTED: uncharacterized protein LOC109337195 [Lupinus angustifolius]	ENOG4111B6Q(-)
TRINITY_DN11549_c0_g1		57.96	35.76	350.033	51.8833	91.1167	115.313	56.91	137.54	hypothetical protein TanjilG_22924 [Lupinus angustifolius]	COG1087(udp-glucose 4-epimerase)	sp|O65781|GALE2_CYATE(UDP-glucose 4-epimerase GEPI48 OS=Cyamopsis tetragonoloba OX=3832 PE=2 SV=1)	PF16363(GDP_Man_Dehyd:GDP-mannose 4,6 dehydratase); PF01370(Epimerase:NAD dependent epimerase/dehydratase family); PF02719(Polysacc_synt_2:Polysaccharide biosynthesis protein); PF01073(3Beta_HSD:3-beta hydroxysteroid dehydrogenase/isomerase family); PF04321(RmlD_sub_bind:RmlD substrate binding domain); PF08659(KR:KR domain); PF00106(adh_short:short chain dehydrogenase); PF13460(NAD_binding_10:NAD…
TRINITY_DN11559_c0_g1		3.8333	3.48	1.7367	7.5233	11.2833	4.7367	7.24	5.68	PREDICTED: CRIB domain-containing protein RIC4-like [Lupinus angustifolius]	ENOG4111EED(wiscott-Aldrich syndrome, C-terminal)	sp|Q9FFD5|RIC4_ARATH(CRIB domain-containing protein RIC4 OS=Arabidopsis thaliana OX=3702 GN=RIC4 PE=1 SV=1)	PF00786(PBD:P21-Rho-binding domain)
TRINITY_DN11562_c0_g1		2.65	0.68	0.31	0.67	2.24	0.4233	3.7233	0.6267	PREDICTED: V-type proton ATPase subunit G-like [Lupinus angustifolius] >XP_019461084.1 PREDICTED: V-type proton ATPase subunit G-like [Lupinus angustifolius]	ENOG4111XX0(ATPase, H transporting, lysosomal 13kDa, V1 subunit)	sp|O82628|VATG1_ARATH(V-type proton ATPase subunit G1 OS=Arabidopsis thaliana OX=3702 GN=VHA-G1 PE=1 SV=1)	PF03179(V-ATPase_G:Vacuolar (H+)-ATPase G subunit)
TRINITY_DN11571_c0_g2		0.71	4.44	8.2933	3.1933	1.7033	3.07	2.1967	2.3533	PREDICTED: uncharacterized protein LOC109340158 [Lupinus angustifolius] >OIW16169.1 hypothetical protein TanjilG_18884 [Lupinus angustifolius]	COG5183((Membrane-Associated Ring finger (C3HC4)))		PF12906(RINGv:RING-variant domain)
TRINITY_DN11572_c0_g1		0.0367	0.08	0.22	0.1767	0.12	0.1067	3.31	0.07	Retrovirus-related Pol polyprotein from transposon TNT 1-94 [Vitis vinifera]	ENOG410XS4D(Retrotransposon protein); COG2801(Retrotransposon protein)	sp|P10978|POLX_TOBAC(Retrovirus-related Pol polyprotein from transposon TNT 1-94 OS=Nicotiana tabacum OX=4097 PE=2 SV=1)	PF07727(RVT_2:Reverse transcriptase (RNA-dependent DNA polymerase)); PF00665(rve:Integrase core domain); PF13976(gag_pre-integrs:GAG-pre-integrase domain)
TRINITY_DN11577_c0_g1		0.4833	1.9267	3.3933	2.43	1.03	2.9133	1.5767	1.8633	hypothetical protein TanjilG_15090 [Lupinus angustifolius]	COG0814(Transcription factor)	sp|F4J1Q9|AVT1I_ARATH(Amino acid transporter AVT1I OS=Arabidopsis thaliana OX=3702 GN=AVT1I PE=3 SV=1)	PF01490(Aa_trans:Transmembrane amino acid transporter protein); PF03222(Trp_Tyr_perm:Tryptophan/tyrosine permease family)
TRINITY_DN1157_c0_g1		4.6	6.1733	4	5.8733	2.73	6.51	27.9867	10.8033	hypothetical protein TanjilG_19965 [Lupinus angustifolius]	ENOG410YRBB(Embryo-specific protein 3, (ATS3))	sp|Q6NPM5|ATS3B_ARATH(Embryo-specific protein ATS3B OS=Arabidopsis thaliana OX=3702 GN=ATS3B PE=1 SV=1)	PF06232(ATS3:Embryo-specific protein 3, (ATS3))
TRINITY_DN11582_c0_g1		2.9733	16.78	12.7833	7.7833	5.0867	20.7233	1.44	4.0833
TRINITY_DN11588_c1_g1		146.93	39.1233	35.0733	0	107.817	135.687	68.7433	0	PREDICTED: glutathione S-transferase U17-like [Lupinus angustifolius] >XP_019422340.1 PREDICTED: glutathione S-transferase U17-like [Lupinus angustifolius] >OIV94550.1 hypothetical protein TanjilG_25612 [Lupinus angustifolius]	ENOG410XSIX(thioredoxin domain containing 15)
TRINITY_DN11590_c0_g1		35.83	9.07	20.7867	32.81	17.22	0.73	21.4467	42.9933	PREDICTED: protein argonaute 1-like [Lupinus angustifolius] >OIW16076.1 hypothetical protein TanjilG_04611 [Lupinus angustifolius]	ENOG410XP07(Pentatricopeptide repeat-containing protein)	sp|O04379|AGO1_ARATH(Protein argonaute 1 OS=Arabidopsis thaliana OX=3702 GN=AGO1 PE=1 SV=1)
TRINITY_DN115_c0_g2		62.67	50.46	13.78	40.74	35.1467	23.08	31.8433	30.15	Ribosome biogenesis protein WDR1 [Spatholobus suberectus]	ENOG410XPW5(Component of the NOP7 complex, which is required for maturation of the 25S and 5.8S ribosomal RNAs and formation of the 60S ribosome (By similarity))	sp|Q9LF27|WDR12_ARATH(Ribosome biogenesis protein WDR12 homolog OS=Arabidopsis thaliana OX=3702 GN=WDR12 PE=1 SV=1)	PF00400(WD40:WD domain, G-beta repeat)
TRINITY_DN115_c2_g3		0.0433	0.0267	0.0167	0.0067	0.0067	1.47	0.0267	0.4933	Retrovirus-related Pol polyprotein from transposon TNT 1-94 [Glycine soja]	COG2801(Retrotransposon protein); ENOG410XS4D(Retrotransposon protein)	sp|P10978|POLX_TOBAC(Retrovirus-related Pol polyprotein from transposon TNT 1-94 OS=Nicotiana tabacum OX=4097 PE=2 SV=1)	PF13683(rve_3:Integrase core domain)
TRINITY_DN11606_c0_g1		0.2233	0.4	0.91	0	0.0667	1.5933	0.2967	0	PREDICTED: protein CutA, chloroplastic-like isoform X1 [Lupinus angustifolius]	COG1324(tolerance protein)	sp|P93009|CUTA_ARATH(Protein CutA, chloroplastic OS=Arabidopsis thaliana OX=3702 GN=CUTA PE=1 SV=1)	PF03091(CutA1:CutA1 divalent ion tolerance protein)
TRINITY_DN11609_c0_g1		4.2367	2.6033	0.4767	1.9667	1.9733	1.3167	1.5067	4.44	PREDICTED: uncharacterized protein LOC109343212 [Lupinus angustifolius]	ENOG410YU7U(expressed protein)
TRINITY_DN1160_c1_g1		477.443	136.177	129.937	115.093	189.533	76.0667	194.947	137.64	hypothetical protein TanjilG_15736 [Lupinus angustifolius]	COG0515(Serine Threonine protein kinase)	sp|Q39529|LEC2_CLAKE(Agglutinin-2 OS=Cladrastis kentukea OX=38412 PE=1 SV=1)	PF00139(Lectin_legB:Legume lectin domain); PF18483(Bact_lectin:Bacterial lectin); PF03388(Lectin_leg-like:Legume-like lectin family)
TRINITY_DN11627_c0_g1		7.9767	7.2067	16.55	14.3767	7.86	20.21	4.2333	11.6533	hypothetical protein KK1_003121, partial [Cajanus cajan]	ENOG410ZEA3(Protein of unknown function (DUF3339))		PF11820(DUF3339:Protein of unknown function (DUF3339))
TRINITY_DN1163_c0_g2		42.83	28.5767	12.9033	24.83	4.2267	28.34	21.5767	24.89	PREDICTED: purine permease 1-like [Lupinus angustifolius] >OIW01535.1 hypothetical protein TanjilG_19461 [Lupinus angustifolius]	ENOG410Y9BB(purine permease)	sp|Q9FZ96|PUP1_ARATH(Purine permease 1 OS=Arabidopsis thaliana OX=3702 GN=PUP1 PE=1 SV=1)	PF16913(PUNUT:Purine nucleobase transmembrane transport); PF00892(EamA:EamA-like transporter family); PF04142(Nuc_sug_transp:Nucleotide-sugar transporter)
TRINITY_DN1163_c0_g3		2.7767	11.4167	15.1933	12.3233	9.6233	5.4767	3.1767	6.7333	PREDICTED: purine permease 1-like [Lupinus angustifolius]	ENOG410Y9BB(purine permease)	sp|Q9FZ96|PUP1_ARATH(Purine permease 1 OS=Arabidopsis thaliana OX=3702 GN=PUP1 PE=1 SV=1)	PF16913(PUNUT:Purine nucleobase transmembrane transport); PF04142(Nuc_sug_transp:Nucleotide-sugar transporter); PF00892(EamA:EamA-like transporter family)
TRINITY_DN11640_c0_g2		1.8733	0	0.13	0.4033	0.6267	0	0.5433	0.7467	PREDICTED: uncharacterized protein LOC109326700 [Lupinus angustifolius]
TRINITY_DN11643_c0_g2		2.37	7.1233	9.12	8.2367	8.6767	15.8333	7.8067	4.01	PREDICTED: probable protein phosphatase 2C 78 isoform X1 [Lupinus angustifolius] >OIW10934.1 hypothetical protein TanjilG_27880 [Lupinus angustifolius]	COG0631(Phosphatase)	sp|O81760|P2C63_ARATH(Probable protein phosphatase 2C 63 OS=Arabidopsis thaliana OX=3702 GN=At4g33920 PE=2 SV=1)	PF00481(PP2C:Protein phosphatase 2C); PF13672(PP2C_2:Protein phosphatase 2C)
TRINITY_DN11645_c0_g2		39.7567	23.2933	36.17	43.9933	42.49	0	66.0133	11.9933
TRINITY_DN11658_c0_g2		0.2233	0	0.1233	0.0233	0.4567	0.1867	0	0.51	Retrovirus-related Pol polyprotein from transposon TNT 1-94 [Cajanus cajan]	COG2801(Retrotransposon protein); ENOG410XS4D(Retrotransposon protein)	sp|P10978|POLX_TOBAC(Retrovirus-related Pol polyprotein from transposon TNT 1-94 OS=Nicotiana tabacum OX=4097 PE=2 SV=1)	PF07727(RVT_2:Reverse transcriptase (RNA-dependent DNA polymerase)); PF14223(Retrotran_gag_2:gag-polypeptide of LTR copia-type); PF00665(rve:Integrase core domain); PF13976(gag_pre-integrs:GAG-pre-integrase domain); PF00098(zf-CCHC:Zinc knuckle); PF13961(DUF4219:Domain of unknown function (DUF4219))
TRINITY_DN11661_c0_g2		0.26	0.9733	2.1033	0.66	0.59	0.3933	0.42	1.4767	PREDICTED: uncharacterized protein LOC109348940 isoform X1 [Lupinus angustifolius]	ENOG41128MX(-)		PF04791(LMBR1:LMBR1-like membrane protein)
TRINITY_DN11683_c1_g1		0.2133	0.8933	0.42	0.1267	0.3567	0.5833	0.5433	0.1533
TRINITY_DN11688_c0_g1		1.4433	2.6533	6.85	6.7633	0.67	3.67	4.1333	3.43	PREDICTED: cytochrome P450 77A1 isoform X3 [Lupinus angustifolius]	COG2124(Tubulin, gamma complex associated protein 5)	sp|O48928|C77A3_SOYBN(Cytochrome P450 77A3 OS=Glycine max OX=3847 GN=CYP77A3 PE=2 SV=1)	PF00067(p450:Cytochrome P450)
TRINITY_DN11693_c0_g1		12.2333	7.29	1.3967	0.3767	1.08	12.42	0.61	1.6867
TRINITY_DN11693_c0_g3		0	3.9567	1.77	0.2933	3.8533	7.1067	5.9467	1.7933
TRINITY_DN11697_c0_g1		6.6333	6.9567	22.7233	9.38	4.9	16.4867	13.0967	10.8	PREDICTED: uncharacterized protein LOC109338507 isoform X1 [Lupinus angustifolius] >XP_019431321.1 PREDICTED: uncharacterized protein LOC109338507 isoform X1 [Lupinus angustifolius] >XP_019431325.1 PREDICTED: uncharacterized protein LOC109338507 isoform X1 [Lupinus angustifolius] >XP_019431332.1 PREDICTED: uncharacterized protein LOC109338507 isoform X1 [Lupinus angustifolius]	ENOG411269M(-)
TRINITY_DN116_c0_g1		2.4	0.2433	1.7567	1.7	4.09	0.12	3.01	3.0267	hypothetical protein TanjilG_16890 [Lupinus angustifolius]	ENOG411187R(-)
TRINITY_DN11701_c0_g1		0.9133	0.8733	0.5933	3.4533	0.46	2.9833	0.0867	1.2467	PREDICTED: outer envelope pore protein 16-2, chloroplastic [Lupinus angustifolius] >OIW00145.1 hypothetical protein TanjilG_29135 [Lupinus angustifolius]	ENOG410YI0M(Mitochondrial import inner membrane translocase subunit Tim17 Tim22 Tim23 family protein)	sp|Q0WMZ5|OP162_ARATH(Outer envelope pore protein 16-2, chloroplastic OS=Arabidopsis thaliana OX=3702 GN=OEP162 PE=2 SV=1)
TRINITY_DN11703_c0_g1		1.0167	3.4467	1.0467	2.5533	5.38	2.8533	0.8067	1.6633
TRINITY_DN11704_c0_g1		43.4	10.6367	5.4267	12.5367	14.9533	10.6467	34.6833	5.77	PREDICTED: protein WEAK CHLOROPLAST MOVEMENT UNDER BLUE LIGHT 1-like [Lupinus angustifolius]	ENOG410YG1U(Pfam:DUF827)	sp|Q9C638|WEL2_ARATH(Protein WEAK CHLOROPLAST MOVEMENT UNDER BLUE LIGHT-like 2 OS=Arabidopsis thaliana OX=3702 GN=WEL2 PE=2 SV=1)	PF05701(WEMBL:Weak chloroplast movement under blue light)
TRINITY_DN11705_c0_g1		23.28	30.44	16.15	12.87	26.22	8.04	22.24	25.7667	zinc transporter 11 [Arachis ipaensis] >XP_025626757.1 zinc transporter 11 [Arachis hypogaea] >RYR27999.1 hypothetical protein Ahy_B01g052083 [Arachis hypogaea]	ENOG4111GP2(zinc transporter)	sp|Q94EG9|ZIP11_ARATH(Zinc transporter 11 OS=Arabidopsis thaliana OX=3702 GN=ZIP11 PE=2 SV=1)	PF02535(Zip:ZIP Zinc transporter)
TRINITY_DN11707_c0_g2		6.0967	4.8533	3.74	9.9833	5.0133	1.4967	7.04	8.7633	PREDICTED: uncharacterized protein LOC109360763 isoform X1 [Lupinus angustifolius] >XP_019461401.1 PREDICTED: uncharacterized protein LOC109360763 isoform X1 [Lupinus angustifolius] >OIW02930.1 hypothetical protein TanjilG_29706 [Lupinus angustifolius]	COG0484(ATP binding to DnaK triggers the release of the substrate protein, thus completing the reaction cycle. Several rounds of ATP-dependent interactions between DnaJ, DnaK and GrpE are required for fully efficient folding. Also involved, together with DnaK and GrpE, in the DNA replication of plasmids through activation of initiation proteins (By similarity))	sp|P48353|HLJ1_YEAST(Protein HLJ1 OS=Saccharomyces cerevisiae (strain ATCC 204508 / S288c) OX=559292 GN=HLJ1 PE=1 SV=1)	PF00226(DnaJ:DnaJ domain)
TRINITY_DN11719_c0_g1		104.603	36.26	6.9267	31.7467	47.1933	26.25	85.3667	16.7967	hypothetical protein E2542_SST26136 [Spatholobus suberectus]	ENOG410ZEKY(hydrolase family 16)
TRINITY_DN11720_c0_g2		2.4067	7.5567	11.7167	8.0767	5.79	12.09	6.2933	7.3067	PREDICTED: auxin response factor 9-like isoform X3 [Lupinus angustifolius]	ENOG410YECH(auxin response factor)	sp|Q9XED8|ARFI_ARATH(Auxin response factor 9 OS=Arabidopsis thaliana OX=3702 GN=ARF9 PE=1 SV=1)	PF06507(Auxin_resp:Auxin response factor); PF02362(B3:B3 DNA binding domain); PF02309(AUX_IAA:AUX/IAA family)
TRINITY_DN11724_c0_g1		5.5733	16.13	12.6467	3.7167	9.2	19.9967	19.4167	12.6333	unnamed protein product, partial [Brassica oleracea]	COG1004(UDP-glucose 6-dehydrogenase)	sp|Q2QS13|UGDH5_ORYSJ(UDP-glucose 6-dehydrogenase 5 OS=Oryza sativa subsp. japonica OX=39947 GN=UGD5 PE=2 SV=1)	PF03721(UDPG_MGDP_dh_N:UDP-glucose/GDP-mannose dehydrogenase family, NAD binding domain)
TRINITY_DN11724_c0_g3		8.71	0.79	6.24	2.87	5.9367	8.7067	1.3	6.2967	hypothetical protein TanjilG_30849 [Lupinus angustifolius]			PF01074(Glyco_hydro_38N:Glycosyl hydrolases family 38 N-terminal domain)
TRINITY_DN11740_c1_g1		11.4767	10.8233	12.0633	12.0633	3.6533	19.6167	8.3833	12.8633	PREDICTED: two-component response regulator ARR9-like isoform X2 [Lupinus angustifolius]	COG0784(response regulator)	sp|O80366|ARR9_ARATH(Two-component response regulator ARR9 OS=Arabidopsis thaliana OX=3702 GN=ARR9 PE=1 SV=1)	PF00072(Response_reg:Response regulator receiver domain)
TRINITY_DN11743_c0_g1		3.5633	6.8767	10.4267	5.5267	7.6833	7.3167	1.9567	7.6433	hypothetical protein TanjilG_13660 [Lupinus angustifolius]	ENOG410ZD5Q(-)
TRINITY_DN11749_c0_g2		3.9333	3.01	1.8267	1.9167	2.79	6.74	1.21	3.2133	PREDICTED: non-specific lipid-transfer protein-like protein At5g64080 isoform X2 [Lupinus angustifolius]	ENOG410Z3NP(Non-specific lipid-transfer protein-like protein)	sp|Q8VYI9|NLTL5_ARATH(Non-specific lipid-transfer protein-like protein At5g64080 OS=Arabidopsis thaliana OX=3702 GN=At5g64080 PE=2 SV=1)	PF14368(LTP_2:Probable lipid transfer); PF00234(Tryp_alpha_amyl:Protease inhibitor/seed storage/LTP family)
TRINITY_DN11752_c0_g1		14.28	17.8833	1.52	8.1533	2.0333	1.8767	1.6033	8.6067
TRINITY_DN11753_c0_g1		189.183	62.4967	16.1033	73.7967	91.94	46.0333	128.64	42.78	PREDICTED: UDP-glucuronate 4-epimerase 3-like [Lupinus angustifolius] >OIW00809.1 hypothetical protein TanjilG_08104 [Lupinus angustifolius]	COG0451(Nad-dependent epimerase dehydratase)	sp|O81312|GAE3_ARATH(UDP-glucuronate 4-epimerase 3 OS=Arabidopsis thaliana OX=3702 GN=GAE3 PE=2 SV=1)	PF01370(Epimerase:NAD dependent epimerase/dehydratase family); PF16363(GDP_Man_Dehyd:GDP-mannose 4,6 dehydratase); PF01073(3Beta_HSD:3-beta hydroxysteroid dehydrogenase/isomerase family); PF04321(RmlD_sub_bind:RmlD substrate binding domain); PF02719(Polysacc_synt_2:Polysaccharide biosynthesis protein); PF07993(NAD_binding_4:Male sterility protein); PF05368(NmrA:NmrA-like family); PF08659(KR:KR do…
TRINITY_DN11756_c0_g1		5.31	3.3367	2.96	2.2367	3.4967	11.3133	3.96	9.0567	PREDICTED: metal tolerance protein 11 isoform X1 [Nelumbo nucifera] >XP_010253332.1 PREDICTED: metal tolerance protein 11 isoform X1 [Nelumbo nucifera]		sp|O80632|MTP11_ARATH(Metal tolerance protein 11 OS=Arabidopsis thaliana OX=3702 GN=MTP11 PE=2 SV=1)
TRINITY_DN11757_c0_g1		12.5	4.1133	0.59	3.94	5.74	3.0433	9.3433	2.35	PREDICTED: pollen receptor-like kinase 3 [Lupinus angustifolius]	COG0515(Serine Threonine protein kinase)	sp|Q9M1L7|PRK3_ARATH(Pollen receptor-like kinase 3 OS=Arabidopsis thaliana OX=3702 GN=PRK3 PE=1 SV=1)	PF00069(Pkinase:Protein kinase domain); PF07714(Pkinase_Tyr:Protein tyrosine kinase); PF13855(LRR_8:Leucine rich repeat); PF08263(LRRNT_2:Leucine rich repeat N-terminal domain)
TRINITY_DN11757_c3_g1		2.8433	0.84	0.2433	1.0133	1.22	0.7867	3.24	0.5333	PREDICTED: pollen receptor-like kinase 3 [Lupinus angustifolius]	COG0515(Serine Threonine protein kinase)	sp|Q3E991|PRK6_ARATH(Pollen receptor-like kinase 6 OS=Arabidopsis thaliana OX=3702 GN=PRK6 PE=1 SV=4)	PF00069(Pkinase:Protein kinase domain); PF07714(Pkinase_Tyr:Protein tyrosine kinase)
TRINITY_DN11759_c0_g1		7.43	10.29	36.7433	16.0633	11.8467	28.9767	7.3233	11.33	multicopper oxidase LPR1 [Prunus persica] >ONI31631.1 hypothetical protein PRUPE_1G323200 [Prunus persica] >ONI31632.1 hypothetical protein PRUPE_1G323200 [Prunus persica]	COG2132(Multicopper oxidase)	sp|Q949X9|LPR2_ARATH(Multicopper oxidase LPR2 OS=Arabidopsis thaliana OX=3702 GN=LPR2 PE=2 SV=1)	PF00394(Cu-oxidase:Multicopper oxidase)
TRINITY_DN1175_c0_g2		1.7567	5.8167	10.7033	5.31	3.6867	7.6567	2.1167	4.2833	PREDICTED: DNA-directed RNA polymerase V subunit 5A-like isoform X1 [Lupinus angustifolius] >OIW03184.1 hypothetical protein TanjilG_11821 [Lupinus angustifolius]	COG2012(DNA-dependent RNA polymerase catalyzes the transcription of DNA into RNA using the four ribonucleoside triphosphates as substrates)	sp|Q9M1J2|RPE5A_ARATH(DNA-directed RNA polymerase V subunit 5A OS=Arabidopsis thaliana OX=3702 GN=NRPE5A PE=1 SV=1)	PF01191(RNA_pol_Rpb5_C:RNA polymerase Rpb5, C-terminal domain); PF03871(RNA_pol_Rpb5_N:RNA polymerase Rpb5, N-terminal domain)
TRINITY_DN11781_c0_g1		1.22	4.27	5.5633	2.8833	3.5467	7.61	2.12	2.5167	PREDICTED: zinc finger protein ZAT4-like [Lupinus angustifolius] >OIW19653.1 hypothetical protein TanjilG_18463 [Lupinus angustifolius]	COG5048(Zinc finger protein)	sp|Q9M202|ZAT9_ARATH(Zinc finger protein ZAT9 OS=Arabidopsis thaliana OX=3702 GN=ZAT9 PE=2 SV=1)	PF13912(zf-C2H2_6:C2H2-type zinc finger); PF13894(zf-C2H2_4:C2H2-type zinc finger); PF12171(zf-C2H2_jaz:Zinc-finger double-stranded RNA-binding)
TRINITY_DN11782_c0_g1		7.3133	11.2633	25.2733	33.8433	10.7967	11.5833	8.8933	3.77	PREDICTED: xyloglucan endotransglucosylase/hydrolase protein 22-like [Lupinus angustifolius] >OIW18664.1 hypothetical protein TanjilG_13416 [Lupinus angustifolius]	COG2273(hydrolase family 16)	sp|Q38910|XTH23_ARATH(Probable xyloglucan endotransglucosylase/hydrolase protein 23 OS=Arabidopsis thaliana OX=3702 GN=XTH23 PE=2 SV=1)	PF00722(Glyco_hydro_16:Glycosyl hydrolases family 16); PF06955(XET_C:Xyloglucan endo-transglycosylase (XET) C-terminus)
TRINITY_DN11785_c0_g1		91.9667	22.5767	4.4733	31.4867	59.48	14.37	52.8467	16.2167	PREDICTED: uncharacterized protein LOC109334049 [Lupinus angustifolius]	ENOG41114I7(-)
TRINITY_DN11785_c1_g1		3.86	0.75	0.21	1.1	1.1067	0.6833	5.2467	0.7367	PREDICTED: uncharacterized protein LOC109340768 [Lupinus angustifolius]	ENOG41114I7(-)
TRINITY_DN11796_c1_g1		41.95	14.8533	2.7	16.3633	23.0967	10.0833	37.0833	9.5233	PREDICTED: protein cornichon homolog 4-like [Lupinus angustifolius]	ENOG4111MWH(cornichon homolog)	sp|Q84W04|CNIH4_ARATH(Protein cornichon homolog 4 OS=Arabidopsis thaliana OX=3702 GN=At1g12390 PE=1 SV=1)	PF03311(Cornichon:Cornichon protein)
TRINITY_DN11812_c0_g1		36.98	20.5367	8.25	18.0267	22.0967	12.69	29.4533	14.48	PREDICTED: uncharacterized protein LOC109351363 [Lupinus angustifolius] >OIW08906.1 hypothetical protein TanjilG_05882 [Lupinus angustifolius]	COG0464(Aaa atpase)	sp|O22025|CFXQ_CYAM1(Protein CfxQ homolog OS=Cyanidioschyzon merolae (strain 10D) OX=280699 GN=cfxQ PE=3 SV=2)	PF13857(Ank_5:Ankyrin repeats (many copies)); PF12796(Ank_2:Ankyrin repeats (3 copies)); PF00023(Ank:Ankyrin repeat); PF13637(Ank_4:Ankyrin repeats (many copies)); PF13606(Ank_3:Ankyrin repeat); PF00004(AAA:ATPase family associated with various cellular activities (AAA)); PF13401(AAA_22:AAA domain); PF01078(Mg_chelatase:Magnesium chelatase, subunit ChlI)
TRINITY_DN11813_c0_g1		5.0833	8.5233	4.06	20.28	0	0	5.1067	1.3133	PREDICTED: uncharacterized protein LOC109351350 isoform X1 [Lupinus angustifolius] >XP_019448375.1 PREDICTED: uncharacterized protein LOC109351350 isoform X2 [Lupinus angustifolius] >OIW08919.1 hypothetical protein TanjilG_05895 [Lupinus angustifolius]	ENOG410YUQ1(ZnF_RBZ)	sp|Q5ZLX5|ZRAB2_CHICK(Zinc finger Ran-binding domain-containing protein 2 OS=Gallus gallus OX=9031 GN=ZRANB2 PE=2 SV=1)	PF00641(zf-RanBP:Zn-finger in Ran binding protein and others)
TRINITY_DN11815_c0_g2		0.51	1.31	6.9233	0.65	0.9467	2.3433	0.2867	0.5067	PREDICTED: nudix hydrolase 17, mitochondrial-like [Lupinus angustifolius] >OIV94119.1 hypothetical protein TanjilG_29219 [Lupinus angustifolius]	COG0494(Nudix hydrolase)	sp|Q9ZU95|NUD17_ARATH(Nudix hydrolase 17, mitochondrial OS=Arabidopsis thaliana OX=3702 GN=NUDT17 PE=2 SV=1)	PF00293(NUDIX:NUDIX domain)
TRINITY_DN11828_c0_g1		2.8433	0.5033	0.02	0.14	0.42	0.3867	1.2533	0.1467	PREDICTED: uncharacterized protein LOC109338411 [Lupinus angustifolius]		sp|P0C2F6|RNHX1_ARATH(Putative ribonuclease H protein At1g65750 OS=Arabidopsis thaliana OX=3702 GN=At1g65750 PE=3 SV=1)	PF13456(RVT_3:Reverse transcriptase-like); PF13966(zf-RVT:zinc-binding in reverse transcriptase); PF00075(RNase_H:RNase H)
TRINITY_DN11830_c0_g1		2.61	0.7433	0.47	0.78	0.9667	0.4633	3.8667	0.9533	Putative ribonuclease H protein At1g65750 family [Cajanus cajan]	ENOG410Y65V(Dehydrogenase); ENOG410Y3MT(solute carrier family 29 (nucleoside transporters), member)	sp|P0C2F6|RNHX1_ARATH(Putative ribonuclease H protein At1g65750 OS=Arabidopsis thaliana OX=3702 GN=At1g65750 PE=3 SV=1)	PF13456(RVT_3:Reverse transcriptase-like)
TRINITY_DN11833_c0_g1		131.693	77.0767	175.25	92.1567	140.93	1.01	0.8867	47.3067
TRINITY_DN11835_c1_g1		32.1233	11.4267	1.3367	14.04	11.64	8.69	24.7633	4.9367	hypothetical protein TanjilG_25334 [Lupinus angustifolius]	COG0515(Serine Threonine protein kinase)
TRINITY_DN1183_c1_g1		22.03	37.23	192.007	32.27	50.39	123.53	38.9667	44.8233	PREDICTED: uncharacterized protein LOC109327958 [Lupinus angustifolius] >OIV96333.1 hypothetical protein TanjilG_09760 [Lupinus angustifolius]	ENOG410YWFS(-)
TRINITY_DN11848_c0_g2		1.1433	1.4667	0.8567	2.9467	0	0	1.1867	0.9933	PREDICTED: uncharacterized protein LOC109342024 isoform X1 [Lupinus angustifolius] >OIV89003.1 hypothetical protein TanjilG_07627 [Lupinus angustifolius]
TRINITY_DN1184_c0_g1		0.54	1.29	2.8567	1.7167	0.9333	1.8133	1.7433	1.2167	PREDICTED: histone-lysine N-methyltransferase CLF-like isoform X2 [Lupinus angustifolius]	COG2940(Histone-lysine N-methyltransferase)	sp|P93831|CLF_ARATH(Histone-lysine N-methyltransferase CLF OS=Arabidopsis thaliana OX=3702 GN=CLF PE=1 SV=2)	PF00856(SET:SET domain); PF18264(preSET_CXC:CXC domain)
TRINITY_DN11859_c0_g1		1.2833	2.8933	1.4633	1.51	0.9033	0	3.08	2.97	hypothetical protein TanjilG_32287 [Lupinus angustifolius]	ENOG410YNA2(-)
TRINITY_DN11865_c0_g1		474.01	223.587	105.857	293.43	332.237	229.127	590.16	216.327	hypothetical protein TanjilG_10510 [Lupinus angustifolius]	ENOG410Z9AB(Polyadenylate-binding protein-interacting protein)	sp|Q39096|ERD15_ARATH(Protein EARLY RESPONSIVE TO DEHYDRATION 15 OS=Arabidopsis thaliana OX=3702 GN=ERD15 PE=1 SV=1)
TRINITY_DN11866_c0_g2		8.1467	18.01	12.9533	26.0633	17.0367	0.5133	18.5133	33.2133	ARF6-like protein, partial [Lupinus angustifolius]	ENOG410YA3R(auxin response factor)	sp|Q9ZTX8|ARFF_ARATH(Auxin response factor 6 OS=Arabidopsis thaliana OX=3702 GN=ARF6 PE=1 SV=2)
TRINITY_DN11879_c0_g1		2.3367	9.37	10.7767	12.9367	6.5933	6.5667	8.7967	10.3033	PREDICTED: glucose-1-phosphate adenylyltransferase large subunit 3, chloroplastic/amyloplastic isoform X1 [Lupinus angustifolius] >OIW20101.1 hypothetical protein TanjilG_00608 [Lupinus angustifolius]	COG0448(Transcription factor)	sp|P55229|GLGL1_ARATH(Glucose-1-phosphate adenylyltransferase large subunit 1, chloroplastic OS=Arabidopsis thaliana OX=3702 GN=ADG2 PE=1 SV=3)	PF00483(NTP_transferase:Nucleotidyl transferase)
TRINITY_DN1188_c0_g1		3.46	1.8767	106.583	0.9233	1.3633	1.9433	11.4933	30.8833	hypothetical protein TanjilG_25059 [Lupinus angustifolius]	COG2132(Multicopper oxidase)	sp|Q84J37|LAC15_ARATH(Laccase-15 OS=Arabidopsis thaliana OX=3702 GN=TT10 PE=1 SV=1)	PF00394(Cu-oxidase:Multicopper oxidase); PF07732(Cu-oxidase_3:Multicopper oxidase); PF07731(Cu-oxidase_2:Multicopper oxidase)
TRINITY_DN11893_c0_g1		0.74	0.34	2.26	0.42	0.54	2.54	1.6467	2.07	PREDICTED: uncharacterized protein LOC109345592 [Lupinus angustifolius]			PF04654(DUF599:Protein of unknown function, DUF599)
TRINITY_DN11904_c0_g1		12.8867	2.9333	1.1467	2.31	10.1533	1.77	1.2667	0.2567
TRINITY_DN11911_c0_g1		21.8433	0	0.34	45.9567	25.07	0	44.6633	23.7433	PREDICTED: uncharacterized protein LOC109328377 [Lupinus angustifolius] >XP_019417362.1 PREDICTED: uncharacterized protein LOC109328377 [Lupinus angustifolius] >OIV96928.1 hypothetical protein TanjilG_00510 [Lupinus angustifolius]
TRINITY_DN11914_c0_g1		8.85	8.9967	24.89	8.3733	15.93	33.56	14.4833	11.12	PREDICTED: uncharacterized protein LOC109359146 [Lupinus angustifolius] >OIW02462.1 hypothetical protein TanjilG_05055 [Lupinus angustifolius]	ENOG410YRAF(Protein of unknown function (DUF1677))		PF07911(DUF1677:Protein of unknown function (DUF1677))
TRINITY_DN11914_c0_g2		11.28	9.2933	45.5833	5	24.7333	60.58	17.6133	9.1367	PREDICTED: uncharacterized protein LOC109357495 [Lupinus angustifolius] >OIW04521.1 hypothetical protein TanjilG_13903 [Lupinus angustifolius]	ENOG410YRAF(Protein of unknown function (DUF1677))		PF07911(DUF1677:Protein of unknown function (DUF1677))
TRINITY_DN11927_c0_g1		11.5133	6.9133	6.2433	10.5433	5.48	4.8833	22.3133	5.4033	PREDICTED: probable methyltransferase PMT20 isoform X1 [Lupinus angustifolius] >XP_019423378.1 PREDICTED: probable methyltransferase PMT20 isoform X1 [Lupinus angustifolius] >XP_019423379.1 PREDICTED: probable methyltransferase PMT20 isoform X1 [Lupinus angustifolius] >XP_019423380.1 PREDICTED: probable methyltransferase PMT20 isoform X1 [Lupinus angustifolius] >OIV92951.1 hypothetical protein Ta…	ENOG4111CGI(Methyltransferase)	sp|Q9C6S7|PMTK_ARATH(Probable methyltransferase PMT20 OS=Arabidopsis thaliana OX=3702 GN=At1g31850 PE=2 SV=1)	PF03141(Methyltransf_29:Putative S-adenosyl-L-methionine-dependent methyltransferase)
TRINITY_DN11928_c0_g1		7.6533	3.2667	4.9533	1.1333	18.6733	13.3833	6.25	64.61	PREDICTED: non-specific lipid-transfer protein 1-like isoform X1 [Lupinus angustifolius] >XP_019446662.1 PREDICTED: non-specific lipid-transfer protein 1-like isoform X2 [Lupinus angustifolius] >XP_019446679.1 PREDICTED: non-specific lipid-transfer protein 1-like isoform X2 [Lupinus angustifolius] >XP_019446711.1 PREDICTED: non-specific lipid-transfer protein 1-like [Lupinus angustifolius] >XP_01…	ENOG410YX3Q(Plant non-specific lipid-transfer proteins transfer phospholipids as well as galactolipids across membranes. May play a role in wax or cutin deposition in the cell walls of expanding epidermal cells and certain secretory tissues (By similarity)); ENOG410YWBC(Plant non-specific lipid-transfer proteins transfer phospholipids as well as galactolipids across membranes. May play a role in …	sp|Q9ATH2|NLTP_CORAV(Non-specific lipid-transfer protein Cor a 8 OS=Corylus avellana OX=13451 PE=1 SV=1)	PF00234(Tryp_alpha_amyl:Protease inhibitor/seed storage/LTP family); PF14368(LTP_2:Probable lipid transfer)
TRINITY_DN11930_c0_g1		0	1.4533	0	1.0933	1.8867	1.4567	4.5633	2.41
TRINITY_DN11938_c0_g2		1.6633	1.0567	1.1033	2.7367	2.1367	0	1.7167	1.1633	hypothetical protein TanjilG_04593 [Lupinus angustifolius]	ENOG410XNVQ(Guanine nucleotide binding protein (G protein) alpha)	sp|Q9C516|XLG3_ARATH(Extra-large guanine nucleotide-binding protein 3 OS=Arabidopsis thaliana OX=3702 GN=XLG3 PE=1 SV=1)	PF00503(G-alpha:G-protein alpha subunit)
TRINITY_DN11941_c0_g1		10.2367	5.03	18.76	14.3433	15.1767	25.0967	12.1567	12.4233	PREDICTED: BTB/POZ domain-containing protein At5g41330-like [Lupinus angustifolius] >OIV93550.1 hypothetical protein TanjilG_28707 [Lupinus angustifolius]	ENOG410XSWI(peptidase')	sp|Q9FN67|Y5133_ARATH(BTB/POZ domain-containing protein At5g41330 OS=Arabidopsis thaliana OX=3702 GN=At5g41330 PE=2 SV=1)
TRINITY_DN11941_c0_g2		10.6333	4.37	11.7667	7.6233	11.71	18.7733	8.97	10.09	PREDICTED: BTB/POZ domain-containing protein At5g41330-like [Lupinus angustifolius] >OIV93550.1 hypothetical protein TanjilG_28707 [Lupinus angustifolius]	ENOG410XSWI(Potassium channel tetramerisation domain containing 3)	sp|Q9FN67|Y5133_ARATH(BTB/POZ domain-containing protein At5g41330 OS=Arabidopsis thaliana OX=3702 GN=At5g41330 PE=2 SV=1)	PF02214(BTB_2:BTB/POZ domain)
TRINITY_DN11955_c0_g1		2.4	10.6433	19.9	10.0367	5.2033	13.11	7.13	14.1333	PREDICTED: phosphoenolpyruvate carboxylase 4 [Lupinus angustifolius] >OIV90564.1 hypothetical protein TanjilG_31638 [Lupinus angustifolius]	COG2352(protein transport protein-related)	sp|Q8GVE8|CAPP4_ARATH(Phosphoenolpyruvate carboxylase 4 OS=Arabidopsis thaliana OX=3702 GN=PPC4 PE=2 SV=1)	PF00311(PEPcase:Phosphoenolpyruvate carboxylase)
TRINITY_DN1195_c2_g2		8.8067	9.3867	11.5733	10.81	19.2833	12.4833	5.8333	15.05	PREDICTED: folylpolyglutamate synthase-like isoform X1 [Lupinus angustifolius]
TRINITY_DN11961_c0_g2		60.1333	21.3833	4.0433	28.5233	30.9867	18.4167	75.8833	10.7667	PREDICTED: leucine-rich repeat receptor-like serine/threonine-protein kinase At2g14510 isoform X2 [Lupinus angustifolius]	COG4886(leucine Rich Repeat)	sp|Q9ZQR3|Y2451_ARATH(Leucine-rich repeat receptor-like serine/threonine-protein kinase At2g14510 OS=Arabidopsis thaliana OX=3702 GN=At2g14510 PE=1 SV=1)	PF12819(Malectin_like:Malectin-like domain); PF12799(LRR_4:Leucine Rich repeats (2 copies)); PF13855(LRR_8:Leucine rich repeat); PF11721(Malectin:Malectin domain)
TRINITY_DN11966_c0_g1		2.8633	0.98	0.4033	0.3333	0.4033	0.4167	1.46	0.6633	PREDICTED: uncharacterized protein LOC109357022 [Lupinus angustifolius]	ENOG410Y0W7(PHD)	sp|F4IXE7|IDM1_ARATH(Increased DNA methylation 1 OS=Arabidopsis thaliana OX=3702 GN=IDM1 PE=1 SV=1)	PF05641(Agenet:Agenet domain); PF16135(Jas:TPL-binding domain in jasmonate signalling); PF00628(PHD:PHD-finger); PF00583(Acetyltransf_1:Acetyltransferase (GNAT) family); PF13831(PHD_2:PHD-finger); PF15446(zf-PHD-like:PHD/FYVE-zinc-finger like domain)
TRINITY_DN11967_c0_g1		3.8233	12.3333	15.24	9.51	5.0967	22.23	12.6767	9.6367	PREDICTED: 2-carboxy-1,4-naphthoquinone phytyltransferase, chloroplastic isoform X1 [Lupinus angustifolius]	COG1575(1,4-dihydroxy-2-naphthoate octaprenyltransferase)	sp|Q0WUA3|MENA_ARATH(2-carboxy-1,4-naphthoquinone phytyltransferase, chloroplastic OS=Arabidopsis thaliana OX=3702 GN=ABC4 PE=1 SV=2)	PF01040(UbiA:UbiA prenyltransferase family)
TRINITY_DN11974_c0_g1		61.3233	86.1467	30.1767	54.65	43.0733	0	73.5533	79.4767	alpha-tubulin [Nicotiana tabacum]		sp|P33623|TBA1_ANEPH(Tubulin alpha-1 chain OS=Anemia phyllitidis OX=12940 GN=TUBA1 PE=2 SV=1)	PF03953(Tubulin_C:Tubulin C-terminal domain)
TRINITY_DN11984_c0_g1		0.1467	1.0167	1.3967	1.2867	0.92	1.42	0.2533	0.6333	PREDICTED: zinc finger protein CONSTANS-LIKE 5-like [Lupinus angustifolius] >OIW08597.1 hypothetical protein TanjilG_03273 [Lupinus angustifolius]	ENOG410YZD0(CCT motif); ENOG410XYVB(CCT motif)	sp|Q9SK53|COL3_ARATH(Zinc finger protein CONSTANS-LIKE 3 OS=Arabidopsis thaliana OX=3702 GN=COL3 PE=1 SV=1)	PF06203(CCT:CCT motif)
TRINITY_DN11988_c0_g1		4.5367	4.6833	22.2333	13.3267	12.21	35.4867	8.58	4.1267	PREDICTED: uncharacterized protein LOC109358067 [Lupinus angustifolius]	ENOG41115NF(-)
TRINITY_DN1198_c0_g2		0	3.41	1.7133	0.0233	4.22	1.0367	0	0.5633	PREDICTED: floral homeotic protein APETALA 2-like isoform X3 [Lupinus angustifolius]	ENOG410YBZ8(floral homeotic protein APETALA)	sp|P47927|AP2_ARATH(Floral homeotic protein APETALA 2 OS=Arabidopsis thaliana OX=3702 GN=AP2 PE=1 SV=1)
TRINITY_DN1199_c0_g1		23.9767	8.5	1.3767	8.3	13.2	6.3633	17.5833	5.3133	PREDICTED: uncharacterized protein LOC109359126 [Lupinus angustifolius] >OIW02146.1 hypothetical protein TanjilG_02370 [Lupinus angustifolius]	ENOG410YEIE(CONTAINS InterPro DOMAIN s Munc13 homology 1 (InterPro IPR014770), Protein of)	sp|Q8RX56|UNC13_ARATH(Protein unc-13 homolog OS=Arabidopsis thaliana OX=3702 GN=PATROL1 PE=2 SV=1)	PF05664(DUF810:Plant family of unknown function (DUF810))
TRINITY_DN12002_c0_g1		0.1867	5.3267	18.8367	14.47	2.54	17.1867	10.7233	9.4967	PREDICTED: 14 kDa proline-rich protein DC2.15-like isoform X1 [Lupinus angustifolius] >OIW09791.1 hypothetical protein TanjilG_32229 [Lupinus angustifolius]	ENOG410YRRT(14 kDa proline-rich protein)	sp|Q39176|ERLI1_ARATH(Lipid transfer protein EARLI 1 OS=Arabidopsis thaliana OX=3702 GN=EARLI1 PE=1 SV=1)	PF14547(Hydrophob_seed:Hydrophobic seed protein); PF00234(Tryp_alpha_amyl:Protease inhibitor/seed storage/LTP family)
TRINITY_DN1200_c0_g1		0.8967	1.13	1.9833	1.02	0.9333	4.94	3.2867	3.0933	PREDICTED: uncharacterized protein LOC109334184 isoform X3 [Lupinus angustifolius]	ENOG410YXFJ(-)
TRINITY_DN12010_c0_g1		62.0633	105.667	55.67	87.8333	36.9933	0	138.54	81.8567	PREDICTED: 10 kDa chaperonin 1, chloroplastic-like [Lupinus angustifolius]
TRINITY_DN12011_c1_g1		0.8867	0.4033	0	0.4567	1.1133	1.2367	0.67	0.7367	PREDICTED: uncharacterized protein LOC109355012 [Lupinus angustifolius] >OIW06391.1 hypothetical protein TanjilG_13577 [Lupinus angustifolius]	ENOG410YEIE(CONTAINS InterPro DOMAIN s Munc13 homology 1 (InterPro IPR014770), Protein of)	sp|Q8RX56|UNC13_ARATH(Protein unc-13 homolog OS=Arabidopsis thaliana OX=3702 GN=PATROL1 PE=2 SV=1)	PF05664(DUF810:Plant family of unknown function (DUF810))
TRINITY_DN12012_c0_g1		94.8867	117.167	210.403	170.11	41.56	175.287	285.427	55.5633	PREDICTED: linoleate 9S-lipoxygenase 1-like isoform X2 [Lupinus angustifolius] >OIW04923.1 hypothetical protein TanjilG_15668 [Lupinus angustifolius]	ENOG410YN4N(Plant lipoxygenase may be involved in a number of diverse aspects of plant physiology including growth and development, pest resistance, and senescence or responses to wounding (By similarity)); ENOG410XT0Q(Plant lipoxygenase may be involved in a number of diverse aspects of plant physiology including growth and development, pest resistance, and senescence or responses to wounding (By…	sp|P09186|LOX3_SOYBN(Seed linoleate 9S-lipoxygenase-3 OS=Glycine max OX=3847 GN=LOX1.3 PE=1 SV=1)	PF00305(Lipoxygenase:Lipoxygenase)
TRINITY_DN12022_c1_g1		50.18	132.913	192.023	14.82	6.1333	274.42	11.12	9.65	hypothetical protein TanjilG_05965 [Lupinus angustifolius]	ENOG410XT0Q(Plant lipoxygenase may be involved in a number of diverse aspects of plant physiology including growth and development, pest resistance, and senescence or responses to wounding (By similarity)); ENOG410YN4N(Plant lipoxygenase may be involved in a number of diverse aspects of plant physiology including growth and development, pest resistance, and senescence or responses to wounding (By…	sp|P27481|LOXB_PHAVU(Linoleate 9S-lipoxygenase (Fragment) OS=Phaseolus vulgaris OX=3885 PE=2 SV=1)	PF00305(Lipoxygenase:Lipoxygenase)
TRINITY_DN12025_c0_g1		550.34	161.19	29.5633	229.133	267.313	153.58	399.74	97.0667	PREDICTED: pectate lyase-like [Lupinus angustifolius]	COG3866(pectate lyase activity)	sp|Q9SRH4|PLY7_ARATH(Probable pectate lyase 7 OS=Arabidopsis thaliana OX=3702 GN=At3g01270 PE=2 SV=1)	PF00544(Pec_lyase_C:Pectate lyase); PF04431(Pec_lyase_N:Pectate lyase, N terminus); PF13229(Beta_helix:Right handed beta helix region)
TRINITY_DN12026_c0_g1		3.3067	16.5967	3.0467	2.8333	12.0933	2.54	8.58	4.83	hypothetical protein TanjilG_07497 [Lupinus angustifolius]	COG0216(Peptide chain release factor 1 directs the termination of translation in response to the peptide chain termination codons UAG and UAA (By similarity))	sp|A8F1S1|RF1_RICM5(Peptide chain release factor 1 OS=Rickettsia massiliae (strain Mtu5) OX=416276 GN=prfA PE=3 SV=1)	PF03462(PCRF:PCRF domain); PF00472(RF-1:RF-1 domain)
TRINITY_DN12026_c3_g2		0.0967	0.7067	0.81	0.67	0.5333	0.5567	0.0633	0.8033
TRINITY_DN12028_c0_g1		33.1933	1.9967	10.83	34.4033	11.6567	4.0533	5.3067	0	PREDICTED: trifunctional UDP-glucose 4,6-dehydratase/UDP-4-keto-6-deoxy-D-glucose 3,5-epimerase/UDP-4-keto-L-rhamnose-reductase RHM1-like [Lupinus angustifolius] >XP_019455513.1 PREDICTED: trifunctional UDP-glucose 4,6-dehydratase/UDP-4-keto-6-deoxy-D-glucose 3,5-epimerase/UDP-4-keto-L-rhamnose-reductase RHM1-like [Lupinus angustifolius] >XP_019455514.1 PREDICTED: trifunctional UDP-glucose 4,6-de…	COG1088(LSD1 zinc finger domain containing protein, expressed)	sp|Q9LQ04|RMLCD_ARATH(Bifunctional dTDP-4-dehydrorhamnose 3,5-epimerase/dTDP-4-dehydrorhamnose reductase OS=Arabidopsis thaliana OX=3702 GN=NRS/ER PE=1 SV=1)
TRINITY_DN12031_c0_g1		0.1967	0	5.5867	0.4033	2.59	0	0	1.7233
TRINITY_DN12034_c0_g1		1.1	4.25	4.3933	4.2733	2.4	4.8967	3.26	3.5367	PREDICTED: protein ODORANT1 isoform X2 [Lupinus angustifolius] >OIW20964.1 hypothetical protein TanjilG_26676 [Lupinus angustifolius]	COG5147(Myblike DNAbinding domain containing protein)	sp|F4IRB4|MYB88_ARATH(Transcription factor MYB88 OS=Arabidopsis thaliana OX=3702 GN=MYB88 PE=1 SV=1)	PF00249(Myb_DNA-binding:Myb-like DNA-binding domain); PF13921(Myb_DNA-bind_6:Myb-like DNA-binding domain); PF15963(Myb_DNA-bind_7:Myb DNA-binding like)
TRINITY_DN12039_c0_g1		35.7433	53.53	78.1733	46.6867	32.3333	70.2467	16.21	54.41	PREDICTED: heavy metal-associated isoprenylated plant protein 24 [Lupinus angustifolius] >OIV96702.1 hypothetical protein TanjilG_09244 [Lupinus angustifolius]	COG2608(heavy metal transport detoxification protein)	sp|O81464|HIP24_ARATH(Heavy metal-associated isoprenylated plant protein 24 OS=Arabidopsis thaliana OX=3702 GN=HIPP24 PE=1 SV=1)	PF00403(HMA:Heavy-metal-associated domain)
TRINITY_DN12045_c0_g1		1.6367	1.1967	7.6567	8.5533	3.4733	0.8867	0.63	7.8267	PREDICTED: GATA transcription factor 24-like isoform X1 [Lupinus angustifolius] >XP_019438481.1 PREDICTED: GATA transcription factor 24-like isoform X1 [Lupinus angustifolius] >XP_019438482.1 PREDICTED: GATA transcription factor 24-like isoform X1 [Lupinus angustifolius]	COG5641(Transcription factor)	sp|Q8GXL7|GAT24_ARATH(GATA transcription factor 24 OS=Arabidopsis thaliana OX=3702 GN=GATA24 PE=1 SV=2)	PF06203(CCT:CCT motif); PF00320(GATA:GATA zinc finger); PF09425(CCT_2:Divergent CCT motif)
TRINITY_DN12047_c0_g1		1.3867	2.63	8.53	4.65	4.2	10.2267	5.4167	3.79	hypothetical protein TanjilG_01579 [Lupinus angustifolius]	COG0515(purine NTP-dependent helicase activity)
TRINITY_DN12050_c0_g1		0.07	1.6567	0.6833	0.04	0.0233	0.0267	0.1667	0.1433	polyprotein [Cajanus cajan]	COG2801(dTDP-glucose 4-6-dehydratase)	sp|Q91DM0|POLG_PVCV1(Genome polyprotein OS=Petunia vein clearing virus (isolate Shepherd) OX=492094 PE=3 SV=1)
TRINITY_DN12061_c0_g1		0.39	0.35	0.3033	0.31	1.4967	0.6433	0.8633	1.5967	PREDICTED: thaumatin-like protein 1b [Lupinus angustifolius]	ENOG4111KEV(thaumatin-like protein)	sp|A0A1P8B554|THLP1_ARATH(Thaumatin-like protein 1 OS=Arabidopsis thaliana OX=3702 GN=TLP1 PE=2 SV=1)	PF00314(Thaumatin:Thaumatin family); PF16483(Glyco_hydro_64:Beta-1,3-glucanase)
TRINITY_DN12061_c1_g1		0.3433	2.9533	4.0133	8.93	1.32	3.0667	3.4433	3.98	PREDICTED: thaumatin-like protein [Lupinus angustifolius] >OIW10127.1 hypothetical protein TanjilG_21964 [Lupinus angustifolius]	ENOG4111KEV(Protein of unknown function (DUF2921))	sp|P50699|TLPH_ARATH(Thaumatin-like protein OS=Arabidopsis thaliana OX=3702 GN=At1g18250 PE=2 SV=2)	PF00314(Thaumatin:Thaumatin family)
TRINITY_DN12077_c0_g1		2.7933	0.2767	0.04	0.3667	0.69	0.8133	0.9533	0.7933	Retrovirus-related Pol polyprotein from transposon TNT 1-94 [Cajanus cajan]
TRINITY_DN12077_c0_g2		0.9067	0	0	0	0	3.0067	0.54	0.8267	Retrovirus-related Pol polyprotein from transposon TNT 1-94 [Vitis vinifera]
TRINITY_DN12081_c0_g1		31.8033	32.4267	7.75	7.6933	13.2867	4.68	13.44	16.11	hypothetical protein TanjilG_19220 [Lupinus angustifolius]
TRINITY_DN12082_c0_g1		4.74	8.61	15.7867	9.61	4.83	2.9267	9.6833	2.5833	PREDICTED: uncharacterized protein LOC109351650 [Lupinus angustifolius] >OIW08570.1 hypothetical protein TanjilG_03246 [Lupinus angustifolius]	ENOG410YCHD(Root cap)		PF06830(Root_cap:Root cap)
TRINITY_DN12092_c0_g1		1.51	2.3033	0.63	1.7567	0.9067	3.6533	1.3	0.92	hypothetical protein TanjilG_26662 [Lupinus angustifolius]	ENOG410XUJI(-); ENOG410XRB3(Protein kinase, AMP-activated, beta); ENOG410ZKGK(-)	sp|Q9LFY0|PTST2_ARATH(Protein PTST homolog 2, chloroplastic OS=Arabidopsis thaliana OX=3702 GN=PTST2 PE=1 SV=1)	PF16561(AMPK1_CBM:Glycogen recognition site of AMP-activated protein kinase)
TRINITY_DN12094_c0_g2		9.5633	41.36	17	26.6333	49.75	8.5167	17.1	24.1067	PREDICTED: subtilisin-like protease SBT3.17 [Lupinus angustifolius] >OIW01398.1 hypothetical protein TanjilG_02554 [Lupinus angustifolius]	ENOG41121HN(Peptidase inhibitor I9)	sp|Q8GWX9|SBT3G_ARATH(Subtilisin-like protease SBT3.16 OS=Arabidopsis thaliana OX=3702 GN=SBT3.16 PE=2 SV=1)	PF05922(Inhibitor_I9:Peptidase inhibitor I9)
TRINITY_DN12096_c0_g2		30.27	10.3567	4.5333	12.2967	15.3433	10.39	22.5167	9.4133	PREDICTED: probable xyloglucan glycosyltransferase 12 [Lupinus angustifolius] >OIV96397.1 hypothetical protein TanjilG_09824 [Lupinus angustifolius]	COG1215(Glycosyl transferase, family 2)	sp|Q9ZQB9|CSLCC_ARATH(Probable xyloglucan glycosyltransferase 12 OS=Arabidopsis thaliana OX=3702 GN=CSLC12 PE=1 SV=1)	PF13632(Glyco_trans_2_3:Glycosyl transferase family group 2); PF13641(Glyco_tranf_2_3:Glycosyltransferase like family 2); PF13506(Glyco_transf_21:Glycosyl transferase family 21); PF00535(Glycos_transf_2:Glycosyl transferase family 2)
TRINITY_DN12111_c0_g1		0.53	0.8133	0.4433	1.2933	2.41	0	0.88	0	hypothetical protein TanjilG_29678 [Lupinus angustifolius]	COG5059(Kinesin family member)	sp|F4JDI6|KN12F_ARATH(Kinesin-like protein KIN-12F OS=Arabidopsis thaliana OX=3702 GN=KIN12F PE=3 SV=1)
TRINITY_DN12122_c3_g1		4.0933	0.1067	3.52	11.8933	1.8033	0.1033	0	0.36
TRINITY_DN12127_c0_g1		24.02	66.36	118.313	68.9333	42.76	70.6967	53.0933	63	PREDICTED: photosystem I reaction center subunit III, chloroplastic-like [Lupinus angustifolius] >XP_019426422.1 PREDICTED: photosystem I reaction center subunit III, chloroplastic-like [Lupinus angustifolius] >OIV91905.1 hypothetical protein TanjilG_17897 [Lupinus angustifolius]	ENOG4111JQH(photosystem i)	sp|P46486|PSAF_FLATR(Photosystem I reaction center subunit III, chloroplastic OS=Flaveria trinervia OX=4227 GN=PSAF PE=2 SV=1)	PF02507(PSI_PsaF:Photosystem I reaction centre subunit III)
TRINITY_DN12127_c0_g2		108.823	321.307	520.887	318.097	172.333	326.403	277.347	351.41	PREDICTED: photosystem I reaction center subunit III, chloroplastic-like [Lupinus angustifolius] >XP_019419656.1 PREDICTED: photosystem I reaction center subunit III, chloroplastic-like [Lupinus angustifolius] >OIV96015.1 hypothetical protein TanjilG_27119 [Lupinus angustifolius]	ENOG4111JQH(photosystem i)	sp|Q9SHE8|PSAF_ARATH(Photosystem I reaction center subunit III, chloroplastic OS=Arabidopsis thaliana OX=3702 GN=PSAF PE=1 SV=1)	PF02507(PSI_PsaF:Photosystem I reaction centre subunit III)
TRINITY_DN12149_c0_g1		2.9733	17.2233	24.07	21.35	7.88	18.0933	8.8267	9.2367	PREDICTED: uncharacterized protein LOC109346182 isoform X2 [Lupinus angustifolius]	COG3450(Enzyme of the cupin superfamily)		PF05899(Cupin_3:Protein of unknown function (DUF861)); PF07883(Cupin_2:Cupin domain); PF06249(EutQ:Ethanolamine utilisation protein EutQ)
TRINITY_DN12152_c0_g1		0.3967	2.9133	5.6867	2.75	1.1967	4.14	1.58	2.6833	PREDICTED: formin-like protein 2 [Lupinus angustifolius]	ENOG410XQR0(inverted formin, FH2 and WH2 domain containing); ENOG410ZJAQ(Formin Homology 2 Domain); ENOG410ZSH0(FH2); ENOG410ZK55(Formin Homology 2 Domain)	sp|Q9SE97|FH1_ARATH(Formin-like protein 1 OS=Arabidopsis thaliana OX=3702 GN=FH1 PE=1 SV=1)	PF02181(FH2:Formin Homology 2 Domain)
TRINITY_DN12153_c0_g1		23.53	7.4167	0.41	5.7633	9.72	5.1	17.5767	12.5533	PREDICTED: probable fatty acyl-CoA reductase 4 [Lupinus angustifolius]	ENOG410XS7R(fatty-acyl-CoA reductase (alcohol-forming) activity)	sp|Q9LXN3|FACR4_ARATH(Probable fatty acyl-CoA reductase 4 OS=Arabidopsis thaliana OX=3702 GN=FAR4 PE=1 SV=1)	PF07993(NAD_binding_4:Male sterility protein); PF03015(Sterile:Male sterility protein); PF01073(3Beta_HSD:3-beta hydroxysteroid dehydrogenase/isomerase family); PF16363(GDP_Man_Dehyd:GDP-mannose 4,6 dehydratase)
TRINITY_DN12155_c0_g1		6.4167	0.4033	1.8167	1.8933	0.32	0.1367	0.33	1.9267	hypothetical protein TanjilG_19957 [Lupinus angustifolius]	COG0553(helicase)	sp|Q9SIW2|CHR35_ARATH(Protein CHROMATIN REMODELING 35 OS=Arabidopsis thaliana OX=3702 GN=DRD1 PE=1 SV=1)
TRINITY_DN12156_c0_g1		21.49	7.06	1.5033	7.8	10.6567	5.3833	14.1333	4.92	PREDICTED: uncharacterized protein LOC109325902 [Lupinus angustifolius]	ENOG410YJSK(-)	sp|Q6C8F7|EFR3_YARLI(Protein EFR3 OS=Yarrowia lipolytica (strain CLIB 122 / E 150) OX=284591 GN=EFR3 PE=3 SV=1)
TRINITY_DN12159_c0_g1		14.7	7.51	2.0667	3.9367	4.3967	2.7767	9.97	4.99	3-oxoacyl-[acyl-carrier-protein] synthase 3 A, chloroplastic [Glycine max] >XP_028248023.1 3-oxoacyl-[acyl-carrier-protein] synthase 3 A, chloroplastic-like [Glycine soja] >KRH40786.1 hypothetical protein GLYMA_09G277400 [Glycine max] >RZB94221.1 3-oxoacyl-[acyl-carrier-protein] synthase 3 B, chloroplastic [Glycine soja]	COG0332(Catalyzes the condensation reaction of fatty acid synthesis by the addition to an acyl acceptor of two carbons from malonyl-ACP. Catalyzes the first condensation reaction which initiates fatty acid synthesis and may therefore play a role in governing the total rate of fatty acid production. Possesses both acetoacetyl-ACP synthase and acetyl transacylase activities. Its substrate specifici…	sp|P49244|FABH1_CUPWR(3-oxoacyl-[acyl-carrier-protein] synthase 3 A, chloroplastic OS=Cuphea wrightii OX=35942 GN=KAS3A PE=2 SV=2)	PF08541(ACP_syn_III_C:3-Oxoacyl-[acyl-carrier-protein (ACP)] synthase III C terminal); PF08545(ACP_syn_III:3-Oxoacyl-[acyl-carrier-protein (ACP)] synthase III); PF02797(Chal_sti_synt_C:Chalcone and stilbene synthases, C-terminal domain); PF00108(Thiolase_N:Thiolase, N-terminal domain)
TRINITY_DN12161_c0_g1		4.63	2.1967	0.8933	1.2333	1.53	0.44	3.38	2.3867	PREDICTED: transcription repressor OFP13-like isoform X1 [Lupinus angustifolius] >OIW21241.1 hypothetical protein TanjilG_31113 [Lupinus angustifolius]	ENOG410YHQG(atofp18 ofp18); ENOG411051E(Pfam:DUF623)	sp|Q9FMC8|OPF13_ARATH(Transcription repressor OFP13 OS=Arabidopsis thaliana OX=3702 GN=OFP13 PE=1 SV=1)	PF04844(Ovate:Transcriptional repressor, ovate)
TRINITY_DN12162_c0_g1		0.72	1.9	4.8433	2.6	1.4967	2.5733	1.6267	2.7933	PREDICTED: pollen-specific leucine-rich repeat extensin-like protein 1 [Lupinus angustifolius] >OIV96056.1 hypothetical protein TanjilG_27160 [Lupinus angustifolius]	ENOG410ZUCS(-)		PF00403(HMA:Heavy-metal-associated domain)
TRINITY_DN12166_c0_g1		0.29	0.5567	0.3133	0.5667	1.2033	0.52	3.5367	1.7033	PREDICTED: uncharacterized protein LOC109337961 [Lupinus angustifolius] >OIW20227.1 hypothetical protein TanjilG_07318 [Lupinus angustifolius]	ENOG410YIGG(C2 domain-containing protein)		PF00168(C2:C2 domain)
TRINITY_DN12200_c0_g1		6.6667	3.24	2.9767	6.26	19.1167	3.8467	4.92	10.8	PREDICTED: protein CHUP1, chloroplastic-like [Lupinus angustifolius]	ENOG410YC73(protein CHUP1, chloroplastic-like); ENOG410XQ4J(inositol oxygenase)	sp|Q8L799|MIOX1_ARATH(Inositol oxygenase 1 OS=Arabidopsis thaliana OX=3702 GN=MIOX1 PE=2 SV=1)
TRINITY_DN12201_c0_g1		19.8067	6.23	1.1633	7.53	9.25	4.78	13.9733	3.4967	PREDICTED: uncharacterized protein LOC109343479 [Lupinus angustifolius]	ENOG4111K31(purine NTP-dependent helicase activity)
TRINITY_DN12214_c0_g1		18.42	7.1867	1.9733	7.5533	10.7933	5.6433	12.58	4.1733	PREDICTED: phosphatidylinositol 4-kinase gamma 2-like [Lupinus angustifolius] >OIV92639.1 hypothetical protein TanjilG_17990 [Lupinus angustifolius]	ENOG410XP06(Phosphatidylinositol 4-kinase type)	sp|Q9SGW8|P4KG2_ARATH(Phosphatidylinositol 4-kinase gamma 2 OS=Arabidopsis thaliana OX=3702 GN=PI4KG2 PE=1 SV=2)	PF00240(ubiquitin:Ubiquitin family)
TRINITY_DN12217_c0_g1		0.9133	5.4667	9.39	0.4767	2.38	11.0567	9.0533	4.1133	hypothetical protein TanjilG_01551 [Lupinus angustifolius]	ENOG41122WA(ArfGAP with FG repeats)
TRINITY_DN12223_c0_g1		0.4367	1.5733	2.28	1.97	0.8933	1.5467	1.7833	1.5633	PREDICTED: inactive leucine-rich repeat receptor-like serine/threonine-protein kinase At1g60630 [Lupinus angustifolius]	ENOG410YEDC(inactive leucine-rich repeat receptor-like serine threonine-protein kinase)	sp|Q84MA9|Y1063_ARATH(Inactive leucine-rich repeat receptor-like serine/threonine-protein kinase At1g60630 OS=Arabidopsis thaliana OX=3702 GN=At1g60630 PE=2 SV=1)	PF00069(Pkinase:Protein kinase domain); PF07714(Pkinase_Tyr:Protein tyrosine kinase); PF12799(LRR_4:Leucine Rich repeats (2 copies)); PF13855(LRR_8:Leucine rich repeat); PF08263(LRRNT_2:Leucine rich repeat N-terminal domain)
TRINITY_DN12230_c0_g2		1.0833	0.58	0.42	0.65	0.4733	0.6133	1.58	1.0633	PREDICTED: uncharacterized protein LOC109327909 [Lupinus angustifolius] >XP_019416623.1 PREDICTED: uncharacterized protein LOC109327909 [Lupinus angustifolius] >OIV96399.1 hypothetical protein TanjilG_09826 [Lupinus angustifolius]	COG3693(expressed protein)	sp|A0A1P8AWH8|XYN1_ARATH(Endo-1,4-beta-xylanase 1 OS=Arabidopsis thaliana OX=3702 GN=XYN1 PE=1 SV=1)	PF00331(Glyco_hydro_10:Glycosyl hydrolase family 10); PF02018(CBM_4_9:Carbohydrate binding domain)
TRINITY_DN12233_c0_g1		1.2067	0.4433	3.73	1.0833	1.5033	5.12	5.7967	70.6967	PREDICTED: bidirectional sugar transporter SWEET12-like [Lupinus angustifolius] >XP_019430075.1 PREDICTED: bidirectional sugar transporter SWEET12-like [Lupinus angustifolius] >OIW19920.1 hypothetical protein TanjilG_30834 [Lupinus angustifolius]	ENOG4111M4R(sugar transporter)	sp|O82587|SWT12_ARATH(Bidirectional sugar transporter SWEET12 OS=Arabidopsis thaliana OX=3702 GN=SWEET12 PE=1 SV=1)	PF03083(MtN3_slv:Sugar efflux transporter for intercellular exchange); PF04193(PQ-loop:PQ loop repeat)
TRINITY_DN12233_c1_g1		48.3767	2.2833	7.96	18.54	12.2433	21.5033	95.6533	8.9133	PREDICTED: bidirectional sugar transporter N3-like [Lupinus angustifolius] >OIW00248.1 hypothetical protein TanjilG_27499 [Lupinus angustifolius]	ENOG4111M4R(sugar transporter)	sp|B8BKP4|SWT14_ORYSI(Bidirectional sugar transporter SWEET14 OS=Oryza sativa subsp. indica OX=39946 GN=SWEET14 PE=2 SV=1)	PF03083(MtN3_slv:Sugar efflux transporter for intercellular exchange)
TRINITY_DN12234_c0_g1		4.6967	13.8233	19.6733	12.14	6.37	10.45	13.9067	24.7933	hypothetical protein TanjilG_06647 [Lupinus angustifolius]	COG4886(leucine Rich Repeat)	sp|Q42484|RPS2_ARATH(Disease resistance protein RPS2 OS=Arabidopsis thaliana OX=3702 GN=RPS2 PE=1 SV=1)	PF00931(NB-ARC:NB-ARC domain)
TRINITY_DN12235_c0_g1		40.1367	12.8267	0.5533	4.9567	9.7533	11.4667	4.07	2.1267	PREDICTED: 3-hydroxy-3-methylglutaryl-coenzyme A reductase 1-like [Lupinus angustifolius] >OIV93817.1 hypothetical protein TanjilG_03780 [Lupinus angustifolius]	COG1257()-reductase)	sp|P14891|HMDH1_ARATH(3-hydroxy-3-methylglutaryl-coenzyme A reductase 1 OS=Arabidopsis thaliana OX=3702 GN=HMG1 PE=1 SV=1)
TRINITY_DN12246_c0_g1		8.0167	4.6533	3.2767	3.5433	5.1067	2.2067	7.8333	3.8333	PREDICTED: basic leucine zipper 61-like isoform X3 [Lupinus angustifolius]	ENOG410YFVN(bZIP transcription factor domain containing protein, expressed); ENOG410YEVN(bZIP transcription factor domain containing protein, expressed)	sp|F4IN23|BZP34_ARATH(Basic leucine zipper 34 OS=Arabidopsis thaliana OX=3702 GN=BZIP34 PE=1 SV=1)	PF00170(bZIP_1:bZIP transcription factor); PF07716(bZIP_2:Basic region leucine zipper); PF03131(bZIP_Maf:bZIP Maf transcription factor)
TRINITY_DN12252_c0_g1		0.2733	1.29	0.9133	1.3067	0.7667	0.3233	0.3467	1.0333	PREDICTED: geranylgeranyl transferase type-2 subunit alpha 1-like [Lupinus angustifolius] >OIW16556.1 hypothetical protein TanjilG_17729 [Lupinus angustifolius]	COG5536((alpha) subunit)	sp|Q8VYB7|PGTA1_ARATH(Geranylgeranyl transferase type-2 subunit alpha 1 OS=Arabidopsis thaliana OX=3702 GN=RGTA1 PE=1 SV=1)
TRINITY_DN12253_c0_g1		14.1567	0.36	0.36	0.93	0.86	0.2467	11.4633	0.8067
TRINITY_DN12265_c0_g1		0.0933	6.6733	0.13	8.46	2.4233	0	0	5.7367
TRINITY_DN12265_c0_g2		20.91	16.0833	22.4167	11.3033	26.54	28.2867	7.03	9.97	hypothetical protein TanjilG_30339 [Lupinus angustifolius]
TRINITY_DN12271_c0_g1		1.05	1.2233	1.5133	5.2733	2.7167	0.4067	2.91	0.6967	hypothetical protein TanjilG_21750 [Lupinus angustifolius]
TRINITY_DN12272_c2_g1		1.2	9.3367	11.25	11.9867	6.38	20.7033	7.0733	8.8667	hypothetical protein TanjilG_26296 [Lupinus angustifolius]	ENOG4111GSH(Calcium sensing receptor)	sp|Q9FN48|CAS_ARATH(Calcium sensing receptor, chloroplastic OS=Arabidopsis thaliana OX=3702 GN=CAS PE=1 SV=1)
TRINITY_DN12287_c0_g1		0.1667	0.77	1.6533	0.64	0.7667	1.2	0.6567	1.09	PREDICTED: ABC transporter G family member 14 [Lupinus angustifolius]	COG1131((ABC) transporter)	sp|Q9C6W5|AB14G_ARATH(ABC transporter G family member 14 OS=Arabidopsis thaliana OX=3702 GN=ABCG14 PE=2 SV=1)	PF01061(ABC2_membrane:ABC-2 type transporter)
TRINITY_DN12291_c1_g1		0.4667	0.39	0.6967	0.7267	0.1467	0.6333	0.32	0.9667	Retrovirus-related Pol polyprotein from transposon TNT 1-94 [Vitis vinifera]	ENOG410XS4D(Retrotransposon protein); COG2801(Retrotransposon protein)	sp|P10978|POLX_TOBAC(Retrovirus-related Pol polyprotein from transposon TNT 1-94 OS=Nicotiana tabacum OX=4097 PE=2 SV=1)	PF07727(RVT_2:Reverse transcriptase (RNA-dependent DNA polymerase)); PF00665(rve:Integrase core domain); PF13976(gag_pre-integrs:GAG-pre-integrase domain)
TRINITY_DN12301_c0_g2		2.8633	0.64	0.1933	0.59	0.91	0.4133	3.18	0.7667	tubulin alpha-2 chain isoform X1 [Abrus precatorius]	COG5023(protein polymerization)	sp|Q9ZRR5|TBA3_HORVU(Tubulin alpha-3 chain OS=Hordeum vulgare OX=4513 GN=TUBA3 PE=2 SV=1)	PF00091(Tubulin:Tubulin/FtsZ family, GTPase domain); PF03953(Tubulin_C:Tubulin C-terminal domain)
TRINITY_DN12301_c0_g3		3.4967	0.9267	0.2233	1.3133	1.13	0.9233	3.67	0.7367	PREDICTED: tubulin alpha-3 chain-like [Lupinus angustifolius] >OIV90069.1 hypothetical protein TanjilG_01523 [Lupinus angustifolius]	COG5023(protein polymerization)	sp|Q56WH1|TBA3_ARATH(Tubulin alpha-3 chain OS=Arabidopsis thaliana OX=3702 GN=TUBA3 PE=1 SV=2)	PF00091(Tubulin:Tubulin/FtsZ family, GTPase domain); PF03953(Tubulin_C:Tubulin C-terminal domain)
TRINITY_DN12306_c0_g2		0.94	0.58	0.6	0.5367	0.7	0.0633	0.6833	0.4267
TRINITY_DN12307_c0_g1		5.57	6.2733	6.14	9.77	11.7433	0.18	3.0767	10.38
TRINITY_DN12310_c0_g1		2.2867	2.66	15.2633	3.2433	2.13	3.7	5.2833	7.8633	PREDICTED: protein NUCLEAR FUSION DEFECTIVE 4-like [Lupinus angustifolius] >OIW08855.1 hypothetical protein TanjilG_16436 [Lupinus angustifolius]	ENOG410Y7MY(nodulin family)	sp|F4I9E1|NFD4_ARATH(Protein NUCLEAR FUSION DEFECTIVE 4 OS=Arabidopsis thaliana OX=3702 GN=NFD4 PE=3 SV=1)	PF06813(Nodulin-like:Nodulin-like)
TRINITY_DN12314_c0_g1		2.14	0.2067	0.2	0.8933	1.6467	0.7967	1.8233	0.2833	PREDICTED: putative clathrin assembly protein At1g25240 [Lupinus angustifolius] >OIW17345.1 hypothetical protein TanjilG_22457 [Lupinus angustifolius]	ENOG410XQ90(Clathrin assembly protein)	sp|Q9FRH3|CAP13_ARATH(Putative clathrin assembly protein At1g25240 OS=Arabidopsis thaliana OX=3702 GN=At1g25240 PE=3 SV=1)	PF07651(ANTH:ANTH domain)
TRINITY_DN12328_c0_g1		6.5867	9.0733	10.5733	3.4233	6.0867	4.7533	7.1533	18.62	PREDICTED: adenosine deaminase-like protein [Lupinus angustifolius] >OIW20099.1 hypothetical protein TanjilG_00606 [Lupinus angustifolius]	COG1816(adenosine deaminase)	sp|Q0VC13|ADAL_BOVIN(Adenosine deaminase-like protein OS=Bos taurus OX=9913 GN=ADAL PE=2 SV=1)	PF00962(A_deaminase:Adenosine/AMP deaminase)
TRINITY_DN12331_c0_g1		2.2467	0.4533	0.7233	0	1.4767	0.87	2.3833	1.12
TRINITY_DN12334_c0_g1		26.5067	6.4833	1.4567	10.8967	9.79	5.8633	16.8867	5.02	hypothetical protein TanjilG_22252 [Lupinus angustifolius]	ENOG41104QY(Domain of unknown function (DUF3511))		PF12023(DUF3511:Domain of unknown function (DUF3511))
TRINITY_DN12342_c0_g1		67.0433	23.7433	5.2933	24.3633	38.53	18.0667	51.62	13.58	PREDICTED: protein ENHANCED DISEASE RESISTANCE 2-like isoform X1 [Lupinus angustifolius]	ENOG41116PK(pleckstrin homology (PH) domain-containing protein lipid-binding START domain-containing protein); ENOG410YQJJ(Protein of unknown function (DUF1336))	sp|Q8VZF6|EDR2L_ARATH(Protein ENHANCED DISEASE RESISTANCE 2-like OS=Arabidopsis thaliana OX=3702 GN=EDR2L PE=2 SV=1)	PF07059(DUF1336:Protein of unknown function (DUF1336)); PF01852(START:START domain); PF00169(PH:PH domain)
TRINITY_DN12354_c0_g1		13.7	8	2.17	0.24	0.9933	16.6767	3.8367	8.0133	PREDICTED: kinesin-like protein KIN-14R isoform X6 [Lupinus angustifolius]	COG5059(Kinesin family member)	sp|F4IJK6|KN14R_ARATH(Kinesin-like protein KIN-14R OS=Arabidopsis thaliana OX=3702 GN=KIN14R PE=3 SV=1)	PF00225(Kinesin:Kinesin motor domain)
TRINITY_DN12363_c0_g1		1.9933	3.0133	1.9533	2.11	0	0	1.9467	1.6933
TRINITY_DN12365_c0_g1		5.9333	3.8	4.05	1.68	1.78	1.2967	4.19	4.6133	PREDICTED: C2 and GRAM domain-containing protein At5g50170 [Lupinus angustifolius]	ENOG410Y9YW(C2 and GRAM domain-containing protein)	sp|Q9FGS8|C2GR2_ARATH(C2 and GRAM domain-containing protein At5g50170 OS=Arabidopsis thaliana OX=3702 GN=At5g50170 PE=2 SV=1)	PF16016(VASt:VAD1 Analog of StAR-related lipid transfer domain); PF00168(C2:C2 domain); PF02893(GRAM:GRAM domain)
TRINITY_DN12368_c0_g1		88.55	20.7867	5.1833	28.9633	47.0267	25.8033	54.6967	21.8067	PREDICTED: pollen-specific leucine-rich repeat extensin-like protein 3 isoform X1 [Lupinus angustifolius] >OIW01920.1 hypothetical protein TanjilG_15245 [Lupinus angustifolius]	ENOG410Y973(oligo-peptide transporter); COG4886(leucine Rich Repeat)	sp|Q9T0K5|LRX3_ARATH(Leucine-rich repeat extensin-like protein 3 OS=Arabidopsis thaliana OX=3702 GN=LRX3 PE=1 SV=1)	PF13855(LRR_8:Leucine rich repeat); PF08263(LRRNT_2:Leucine rich repeat N-terminal domain)
TRINITY_DN12377_c0_g1		0.8767	8.6933	18.8167	11.44	7.96	16.82	16.74	14.8067	hypothetical protein TanjilG_01973 [Lupinus angustifolius]
TRINITY_DN12378_c0_g1		29.3467	9.1967	1.8333	11.1233	17.48	8.8333	25.6333	5.6433	PREDICTED: putative clathrin assembly protein At5g57200 isoform X2 [Lupinus angustifolius]	ENOG410XQ90(-)	sp|Q9LVD8|CAP7_ARATH(Putative clathrin assembly protein At5g57200 OS=Arabidopsis thaliana OX=3702 GN=At5g57200 PE=3 SV=1)	PF07651(ANTH:ANTH domain); PF01417(ENTH:ENTH domain)
TRINITY_DN12378_c0_g2		3.9	1.0067	0.2	1.4967	2.2167	1.0033	3.4133	0.7767	PREDICTED: putative clathrin assembly protein At5g57200 isoform X1 [Lupinus angustifolius] >OIV98393.1 hypothetical protein TanjilG_16720 [Lupinus angustifolius]	ENOG410XQ90(Clathrin assembly protein)	sp|Q9LVD8|CAP7_ARATH(Putative clathrin assembly protein At5g57200 OS=Arabidopsis thaliana OX=3702 GN=At5g57200 PE=3 SV=1)	PF07651(ANTH:ANTH domain); PF01056(Myc_N:Myc amino-terminal region)
TRINITY_DN12381_c0_g1		9.88	3.3233	0.7067	4.0367	5.8633	2.6933	9.6633	1.8967	PREDICTED: probable serine/threonine-protein kinase WNK7 isoform X1 [Lupinus angustifolius]	ENOG410XQWZ(WNK lysine deficient protein kinase)	sp|Q8S8Y8|WNK6_ARATH(Probable serine/threonine-protein kinase WNK6 OS=Arabidopsis thaliana OX=3702 GN=WNK6 PE=2 SV=1)	PF00069(Pkinase:Protein kinase domain); PF07714(Pkinase_Tyr:Protein tyrosine kinase); PF12202(OSR1_C:Oxidative-stress-responsive kinase 1 C-terminal domain); PF17667(Pkinase_fungal:Fungal protein kinase)
TRINITY_DN12385_c0_g1		2.9733	1.5767	2.8033	4.5933	5.0533	0.2267	6.8367	3.1533	PREDICTED: probable alpha-amylase 2 [Lupinus angustifolius]	COG0366(alpha amylase, catalytic)	sp|Q8LFG1|AMY2_ARATH(Probable alpha-amylase 2 OS=Arabidopsis thaliana OX=3702 GN=AMY2 PE=2 SV=1)	PF07821(Alpha-amyl_C2:Alpha-amylase C-terminal beta-sheet domain); PF00128(Alpha-amylase:Alpha amylase, catalytic domain)
TRINITY_DN12387_c0_g1		9.5433	1.74	0.2333	1.5133	0.98	0.69	15.3633	1.0433	PREDICTED: uncharacterized protein LOC109359988 isoform X1 [Lupinus angustifolius] >OIW01151.1 hypothetical protein TanjilG_17708 [Lupinus angustifolius]	ENOG411172V(Late embryogenesis abundant (LEA) group 1)		PF00805(Pentapeptide:Pentapeptide repeats (8 copies)); PF03760(LEA_1:Late embryogenesis abundant (LEA) group 1)
TRINITY_DN1238_c1_g2		3.71	0.9333	0.15	0.4	1.0133	0.64	4.18	0.5333	PREDICTED: probable aquaporin TIP5-1 [Lupinus angustifolius]	COG0580(Channel that permits osmotically driven movement of water in both directions. It is involved in the osmoregulation and in the maintenance of cell turgor during volume expansion in rapidly growing cells. It mediates rapid entry or exit of water in response to abrupt changes in osmolarity (By similarity))	sp|Q9STX9|TIP51_ARATH(Probable aquaporin TIP5-1 OS=Arabidopsis thaliana OX=3702 GN=TIP5-1 PE=2 SV=1)	PF00230(MIP:Major intrinsic protein)
TRINITY_DN1238_c1_g3		10.4133	55.3167	83.1667	80.4533	21.5167	40.4267	46.1933	40.6433	PREDICTED: aquaporin TIP2-1 [Lupinus angustifolius] >XP_019436448.1 PREDICTED: aquaporin TIP2-1 [Lupinus angustifolius] >OIW15872.1 hypothetical protein TanjilG_04407 [Lupinus angustifolius]	COG0580(Channel that permits osmotically driven movement of water in both directions. It is involved in the osmoregulation and in the maintenance of cell turgor during volume expansion in rapidly growing cells. It mediates rapid entry or exit of water in response to abrupt changes in osmolarity (By similarity))	sp|Q41951|TIP21_ARATH(Aquaporin TIP2-1 OS=Arabidopsis thaliana OX=3702 GN=TIP2-1 PE=1 SV=2)	PF00230(MIP:Major intrinsic protein)
TRINITY_DN12398_c0_g2		3.4	2.01	2.8233	2.1167	3.2933	1.35	0.8967	3.8433	PREDICTED: transcription repressor KAN1-like [Lupinus angustifolius] >OIW19235.1 hypothetical protein TanjilG_20360 [Lupinus angustifolius]	ENOG410YNDA(Myb-like DNA-binding domain); ENOG4111641(Myb-like DNA-binding domain)	sp|Q700D9|MYBF_ARATH(Putative Myb family transcription factor At1g14600 OS=Arabidopsis thaliana OX=3702 GN=At1g14600 PE=2 SV=2)	PF00249(Myb_DNA-binding:Myb-like DNA-binding domain)
TRINITY_DN12398_c0_g3		0.0167	0.5267	0.6933	0.6333	0.2767	0.3267	0.3833	0.2567	PREDICTED: uncharacterized protein LOC109360552 [Lupinus angustifolius] >OIW17962.1 hypothetical protein TanjilG_17798 [Lupinus angustifolius]	ENOG410YNDA(Myb-like DNA-binding domain); ENOG4111641(Myb-like DNA-binding domain)	sp|Q700D9|MYBF_ARATH(Putative Myb family transcription factor At1g14600 OS=Arabidopsis thaliana OX=3702 GN=At1g14600 PE=2 SV=2)	PF00249(Myb_DNA-binding:Myb-like DNA-binding domain)
TRINITY_DN12399_c0_g1		0.4033	0.22	0.3033	0.7067	0.4933	0.1767	3.5867	1.56	PREDICTED: myb-related protein B-like isoform X1 [Lupinus angustifolius]	COG5147(Myblike DNAbinding domain containing protein)	sp|Q94FL9|MB3R4_ARATH(Transcription factor MYB3R-4 OS=Arabidopsis thaliana OX=3702 GN=MYB3R4 PE=1 SV=1)	PF00249(Myb_DNA-binding:Myb-like DNA-binding domain); PF13921(Myb_DNA-bind_6:Myb-like DNA-binding domain); PF09111(SLIDE:SLIDE)
TRINITY_DN12399_c0_g2		0.1733	0.5333	0.0767	1.0567	0.6333	0.51	3.5233	1.6467	hypothetical protein TanjilG_22093 [Lupinus angustifolius]
TRINITY_DN1239_c3_g1		1.28	0	1.4033	2.8133	1.38	0.43	0	0.0933
TRINITY_DN12402_c0_g2		3.0233	3.8133	10.3233	4.0367	2.53	19.13	3.1767	3.6633	PREDICTED: heavy metal-associated isoprenylated plant protein 36-like [Lupinus angustifolius] >OIW13359.1 hypothetical protein TanjilG_02879 [Lupinus angustifolius]	COG2608(heavy metal transport detoxification protein)	sp|Q84J88|HIP36_ARATH(Heavy metal-associated isoprenylated plant protein 36 OS=Arabidopsis thaliana OX=3702 GN=HIPP36 PE=2 SV=1)	PF00403(HMA:Heavy-metal-associated domain)
TRINITY_DN12406_c0_g1		14.2867	6.66	11.67	22.9267	15.29	0.8333	13.0433	17.5333	PREDICTED: aspartic proteinase-like [Lupinus angustifolius] >XP_019452292.1 PREDICTED: aspartic proteinase-like [Lupinus angustifolius] >XP_019452294.1 PREDICTED: aspartic proteinase-like [Lupinus angustifolius] >XP_019452295.1 PREDICTED: aspartic proteinase-like [Lupinus angustifolius] >XP_019452296.1 PREDICTED: aspartic proteinase-like [Lupinus angustifolius] >OIW07068.1 hypothetical protein Ta…	ENOG410XNV7(aspartic)	sp|Q8VYL3|APA2_ARATH(Aspartic proteinase A2 OS=Arabidopsis thaliana OX=3702 GN=APA2 PE=2 SV=1)
TRINITY_DN12409_c0_g1		1.6467	2.4133	2.0367	11.0767	5.4333	6.1533	5.0167	0.4433	hypothetical protein TanjilG_31906 [Lupinus angustifolius]	ENOG41115QR(-)
TRINITY_DN12413_c0_g2		6.72	5.2467	23.06	11.5467	13.53	6.27	10.4	19.0767	PREDICTED: inorganic phosphate transporter 1-4-like isoform X2 [Lupinus angustifolius]	ENOG410ZVN7(phosphate transporter)	sp|Q96303|PHT14_ARATH(Inorganic phosphate transporter 1-4 OS=Arabidopsis thaliana OX=3702 GN=PHT1-4 PE=1 SV=1)	PF00083(Sugar_tr:Sugar (and other) transporter); PF07690(MFS_1:Major Facilitator Superfamily)
TRINITY_DN12415_c0_g1		3.0867	26.2867	69.8933	44.89	20.6533	27.7	31.88	22.8533	PREDICTED: xyloglucan endotransglucosylase/hydrolase protein 9-like [Lupinus angustifolius] >XP_019448028.1 PREDICTED: xyloglucan endotransglucosylase/hydrolase protein 9-like [Lupinus angustifolius] >OIW09228.1 hypothetical protein TanjilG_11366 [Lupinus angustifolius]	ENOG410YBFU(xyloglucan endotransglucosylase hydrolase protein)	sp|Q8LDW9|XTH9_ARATH(Xyloglucan endotransglucosylase/hydrolase protein 9 OS=Arabidopsis thaliana OX=3702 GN=XTH9 PE=2 SV=2)	PF06955(XET_C:Xyloglucan endo-transglycosylase (XET) C-terminus); PF00722(Glyco_hydro_16:Glycosyl hydrolases family 16)
TRINITY_DN12415_c0_g3		0.07	0.81	0.5467	1.2433	0.4133	1.2933	0.52	1.0233	PREDICTED: xyloglucan endotransglucosylase/hydrolase protein 9-like [Lupinus angustifolius] >OIW04011.1 hypothetical protein TanjilG_30287 [Lupinus angustifolius]	ENOG410YBFU(xyloglucan endotransglucosylase hydrolase protein)	sp|Q8LDW9|XTH9_ARATH(Xyloglucan endotransglucosylase/hydrolase protein 9 OS=Arabidopsis thaliana OX=3702 GN=XTH9 PE=2 SV=2)	PF00722(Glyco_hydro_16:Glycosyl hydrolases family 16)
TRINITY_DN12419_c0_g1		1.7433	0.2867	0.0933	0.5033	0.2967	0.26	3.0033	0.3467	hypothetical protein TanjilG_23437 [Lupinus angustifolius]	COG1874(beta-galactosidase)	sp|Q9SCU9|BGA13_ARATH(Beta-galactosidase 13 OS=Arabidopsis thaliana OX=3702 GN=BGAL13 PE=2 SV=1)	PF01301(Glyco_hydro_35:Glycosyl hydrolases family 35); PF17834(GHD:Beta-sandwich domain in beta galactosidase); PF02140(Gal_Lectin:Galactose binding lectin domain); PF13364(BetaGal_dom4_5:Beta-galactosidase jelly roll domain)
TRINITY_DN12419_c0_g2		238.377	1.8233	0	1.41	0	119.23	7.5067	13.25	PREDICTED: beta-galactosidase 13-like [Lupinus angustifolius] >OIW14712.1 hypothetical protein TanjilG_33054 [Lupinus angustifolius]	COG1874(beta-galactosidase)	sp|Q6ZJJ0|BGA11_ORYSJ(Beta-galactosidase 11 OS=Oryza sativa subsp. japonica OX=39947 GN=Os08g0549200 PE=2 SV=1)	PF17834(GHD:Beta-sandwich domain in beta galactosidase)
TRINITY_DN12420_c0_g1		0.3833	1.6933	2.22	2.3767	0.7733	0.93	0.5033	0.9467	PREDICTED: uncharacterized protein LOC109349934 [Lupinus angustifolius] >XP_019446551.1 PREDICTED: uncharacterized protein LOC109349934 [Lupinus angustifolius]	ENOG410ZJEB(peptidase c45 acyl-coenzyme a 6-aminopenicillanic acid acyl-transferase)		PF03417(AAT:Acyl-coenzyme A:6-aminopenicillanic acid acyl-transferase)
TRINITY_DN12428_c0_g1		121.36	242.147	114.72	195.927	342.937	237.16	100.17	190.9	Auxin-responsive protein IAA14 isoform A [Glycine soja]
TRINITY_DN12439_c0_g1		0.3367	0.3733	3.6767	0.6433	2.55	2.9067	0.43	0.41	PREDICTED: phylloplanin-like [Lupinus angustifolius]	ENOG410Z2F4(Pollen proteins Ole e I like)	sp|Q56S59|PHYLL_TOBAC(Phylloplanin OS=Nicotiana tabacum OX=4097 PE=1 SV=1)	PF01190(Pollen_Ole_e_I:Pollen proteins Ole e I like)
TRINITY_DN1243_c0_g1		0.4967	1.5	5.4133	3.08	0.69	3.6067	0.4533	3.8933	PREDICTED: uncharacterized protein LOC109359348 [Lupinus angustifolius] >OIW01220.1 hypothetical protein TanjilG_10381 [Lupinus angustifolius]	ENOG410ZE5B(-)
TRINITY_DN12449_c1_g1		4.79	1.14	0.4933	1.68	2.32	0.87	4.8233	0.79	PREDICTED: uncharacterized protein At1g04910-like isoform X1 [Lupinus angustifolius]	ENOG410YKDZ(DUF246 domain-containing protein)	sp|Q9SH89|OFT19_ARATH(O-fucosyltransferase 19 OS=Arabidopsis thaliana OX=3702 GN=OFUT19 PE=2 SV=1)	PF10250(O-FucT:GDP-fucose protein O-fucosyltransferase)
TRINITY_DN12452_c0_g1		117.913	41.26	5.73	46.22	66.3133	31.6267	98.4033	21.3633	PREDICTED: uncharacterized protein LOC109335288 [Lupinus angustifolius] >OIV90992.1 hypothetical protein TanjilG_16952 [Lupinus angustifolius]	ENOG41105QJ(-); ENOG410ZBXK(-)		PF05553(DUF761:Cotton fibre expressed protein)
TRINITY_DN12457_c0_g1		1.1167	2.47	4.7733	2.73	1.7867	2.8033	3.2067	3.7267	PREDICTED: BTB/POZ domain-containing protein At3g22104-like isoform X1 [Lupinus angustifolius] >OIW08414.1 hypothetical protein TanjilG_03090 [Lupinus angustifolius]	ENOG4111G11(BTB POZ domain-containing protein)	sp|Q9C5J4|Y3210_ARATH(BTB/POZ domain-containing protein At3g22104 OS=Arabidopsis thaliana OX=3702 GN=At3g22104 PE=2 SV=1)	PF03000(NPH3:NPH3 family); PF00651(BTB:BTB/POZ domain)
TRINITY_DN12458_c0_g1		5.8833	1.8833	2.6533	4.5833	4.92	1.42	3.21	1.9533	PREDICTED: D-aminoacyl-tRNA deacylase [Lupinus angustifolius] >OIW14154.1 hypothetical protein TanjilG_21294 [Lupinus angustifolius]	COG1650(Hydrolyzes D-tyrosyl-tRNA(Tyr) into D-tyrosine and free tRNA(Tyr) (By similarity))	sp|Q9ZPQ3|GEK1_ARATH(D-aminoacyl-tRNA deacylase OS=Arabidopsis thaliana OX=3702 GN=GEK1 PE=1 SV=2)	PF04414(tRNA_deacylase:D-aminoacyl-tRNA deacylase)
TRINITY_DN12461_c0_g1		21.65	5.91	0.85	7.1867	9.6967	4.4967	30.7533	3.1067	PREDICTED: probable pectinesterase 67 [Lupinus angustifolius] >OIV95940.1 hypothetical protein TanjilG_27044 [Lupinus angustifolius]	COG4677(-)	sp|Q9LSP1|PME67_ARATH(Probable pectinesterase 67 OS=Arabidopsis thaliana OX=3702 GN=PME67 PE=2 SV=1)	PF01095(Pectinesterase:Pectinesterase)
TRINITY_DN12466_c0_g2		2.7767	0.1267	0.22	0.3	2.33	0.23	0.2567	0.2933	PREDICTED: vacuolar amino acid transporter 1-like [Lupinus angustifolius] >XP_019459489.1 PREDICTED: vacuolar amino acid transporter 1-like [Lupinus angustifolius] >XP_019459490.1 PREDICTED: vacuolar amino acid transporter 1-like [Lupinus angustifolius]	COG0814(amino acid transport)	sp|F4IUW3|AVT1C_ARATH(Amino acid transporter AVT1C OS=Arabidopsis thaliana OX=3702 GN=AVT1C PE=1 SV=1)	PF01490(Aa_trans:Transmembrane amino acid transporter protein)
TRINITY_DN12466_c0_g3		3.7067	0.1433	0.2433	0.2367	2.98	0.21	0.1833	0.4467	hypothetical protein TanjilG_19411 [Lupinus angustifolius]	COG0814(amino acid transport)	sp|F4IUW3|AVT1C_ARATH(Amino acid transporter AVT1C OS=Arabidopsis thaliana OX=3702 GN=AVT1C PE=1 SV=1)	PF01490(Aa_trans:Transmembrane amino acid transporter protein); PF03222(Trp_Tyr_perm:Tryptophan/tyrosine permease family)
TRINITY_DN12466_c1_g1		0.08	0.33	1.09	0.61	0.1233	0.2033	0.0467	0.4567	PREDICTED: vacuolar amino acid transporter 1-like [Lupinus angustifolius] >XP_019459070.1 PREDICTED: vacuolar amino acid transporter 1-like [Lupinus angustifolius] >XP_019459071.1 PREDICTED: vacuolar amino acid transporter 1-like [Lupinus angustifolius] >XP_019459072.1 PREDICTED: vacuolar amino acid transporter 1-like [Lupinus angustifolius] >XP_019459073.1 PREDICTED: vacuolar amino acid transpor…	COG0814(amino acid transport)	sp|F4IUW3|AVT1C_ARATH(Amino acid transporter AVT1C OS=Arabidopsis thaliana OX=3702 GN=AVT1C PE=1 SV=1)	PF01490(Aa_trans:Transmembrane amino acid transporter protein)
TRINITY_DN1246_c0_g2		3.4633	12.89	13.3	11.6867	6.8433	17.83	8.7567	9.5233	PREDICTED: heavy metal-associated isoprenylated plant protein 37-like [Lupinus angustifolius] >OIW12890.1 hypothetical protein TanjilG_24823 [Lupinus angustifolius]	COG2608(AP2)	sp|A2RVM8|HIP37_ARATH(Heavy metal-associated isoprenylated plant protein 37 OS=Arabidopsis thaliana OX=3702 GN=HIPP37 PE=2 SV=1)	PF00403(HMA:Heavy-metal-associated domain)
TRINITY_DN12475_c0_g2		0	0	5.3233	15.3533	7.8167	0	33.4533	0
TRINITY_DN12482_c0_g1		4.8167	14.3867	24.3267	18.2333	8.4633	14.7533	13.5467	14.8567	PREDICTED: aspartyl protease family protein 2-like [Lupinus angustifolius] >OIV95056.1 hypothetical protein TanjilG_10876 [Lupinus angustifolius]	ENOG410XNV7(aspartic)	sp|Q9LNJ3|APF2_ARATH(Aspartyl protease family protein 2 OS=Arabidopsis thaliana OX=3702 GN=APF2 PE=2 SV=1)	PF14543(TAXi_N:Xylanase inhibitor N-terminal); PF14541(TAXi_C:Xylanase inhibitor C-terminal); PF00026(Asp:Eukaryotic aspartyl protease)
TRINITY_DN12500_c0_g1		47.1133	25.31	3.0233	18.01	38.6867	17.6233	33.9767	9.2533	hypothetical protein TanjilG_28604 [Lupinus angustifolius]	ENOG410ZEKY(-); ENOG410Z5JU(-)
TRINITY_DN12510_c0_g1		0.8867	1.99	1.6167	6.0233	0.1433	0.2233	0.28	2.13	PREDICTED: MLP-like protein 31 [Lupinus angustifolius] >OIW03054.1 hypothetical protein TanjilG_19334 [Lupinus angustifolius]		sp|Q9SSK7|MLP34_ARATH(MLP-like protein 34 OS=Arabidopsis thaliana OX=3702 GN=MLP34 PE=2 SV=1)	PF00407(Bet_v_1:Pathogenesis-related protein Bet v I family); PF10604(Polyketide_cyc2:Polyketide cyclase / dehydrase and lipid transport)
TRINITY_DN12511_c0_g1		0.2233	1.8	3.0567	1.3133	0.3933	3.1333	0.7133	2.84	PREDICTED: non-specific lipid-transfer protein-like protein At5g64080 [Lupinus angustifolius] >OIW02097.1 hypothetical protein TanjilG_14746 [Lupinus angustifolius]	ENOG410Z3NP(Non-specific lipid-transfer protein-like protein)	sp|Q8VYI9|NLTL5_ARATH(Non-specific lipid-transfer protein-like protein At5g64080 OS=Arabidopsis thaliana OX=3702 GN=At5g64080 PE=2 SV=1)	PF14368(LTP_2:Probable lipid transfer); PF00234(Tryp_alpha_amyl:Protease inhibitor/seed storage/LTP family)
TRINITY_DN12519_c0_g1		2.7733	5.8167	12.7933	9.9933	14.4633	16.7333	8.4133	11.94	PREDICTED: two-on-two hemoglobin-3-like [Lupinus angustifolius] >OIV96545.1 hypothetical protein TanjilG_24198 [Lupinus angustifolius]	COG2346(K06886 hemoglobin)	sp|Q67XG0|GLB3_ARATH(Two-on-two hemoglobin-3 OS=Arabidopsis thaliana OX=3702 GN=GLB3 PE=1 SV=1)	PF01152(Bac_globin:Bacterial-like globin)
TRINITY_DN12522_c0_g1		31.96	19.79	55.8033	55.5433	3.29	6.4767	54.5533	42.09
TRINITY_DN12528_c0_g1		29.75	77.2067	160.797	96.8833	80.2033	66.5733	55.1767	71.3433	hypothetical protein TanjilG_13506 [Lupinus angustifolius]	COG4870(dynein, light chain)	sp|P25778|ORYC_ORYSJ(Oryzain gamma chain OS=Oryza sativa subsp. japonica OX=39947 GN=Os09g0442300 PE=2 SV=2)	PF00112(Peptidase_C1:Papain family cysteine protease); PF03051(Peptidase_C1_2:Peptidase C1-like family)
TRINITY_DN12532_c0_g2		1	0.02	0.04	0.1233	0.14	0.1767	0.2467	0.2133	hypothetical protein TSUD_292720 [Trifolium subterraneum]
TRINITY_DN12533_c0_g1		18.2933	42.2933	295.807	119.07	69.1933	39.79	20.08	37.1133
TRINITY_DN12537_c0_g1		1.32	1.1233	43.1067	9.03	2.7367	3.2	1.0033	1.76	PREDICTED: BAG family molecular chaperone regulator 6 [Lupinus angustifolius]	ENOG410Z1AE(BAG domain)	sp|O82345|BAG6_ARATH(BAG family molecular chaperone regulator 6 OS=Arabidopsis thaliana OX=3702 GN=BAG6 PE=1 SV=1)	PF02179(BAG:BAG domain); PF00612(IQ:IQ calmodulin-binding motif)
TRINITY_DN1253_c0_g2		1.51	2.3633	5.2333	3.7333	0.9067	2.3667	2.8633	2.2633
TRINITY_DN1253_c1_g1		1.4	1.54	1.99	3.7233	2.4433	4.3767	1.5733	1.88
TRINITY_DN12555_c1_g1		11.7467	3.2967	0.9067	2.3267	4.3233	3.4867	8.54	7.3267	PREDICTED: transcription factor PRE6-like [Lupinus angustifolius] >OIW20969.1 hypothetical protein TanjilG_26681 [Lupinus angustifolius]	ENOG410Z0M7(transcription factor bHLH135-like)	sp|Q8GW32|PRE6_ARATH(Transcription factor PRE6 OS=Arabidopsis thaliana OX=3702 GN=PRE6 PE=1 SV=1)
TRINITY_DN1255_c2_g1		0.53	2.4467	0.57	0.5967	1.16	0.02	0.35	0.2633	PREDICTED: uncharacterized protein LOC109338761 [Lupinus angustifolius]		sp|P08548|LIN1_NYCCO(LINE-1 reverse transcriptase homolog OS=Nycticebus coucang OX=9470 PE=4 SV=1)	PF00078(RVT_1:Reverse transcriptase (RNA-dependent DNA polymerase))
TRINITY_DN12568_c0_g2		0.1867	0	0.19	0.2833	0.5933	1.1167	0.3533	0.3667	PREDICTED: uncharacterized protein LOC109348071 [Lupinus angustifolius]	COG2801(Retrotransposon protein)	sp|Q94HW2|POLR1_ARATH(Retrovirus-related Pol polyprotein from transposon RE1 OS=Arabidopsis thaliana OX=3702 GN=RE1 PE=2 SV=1)	PF14223(Retrotran_gag_2:gag-polypeptide of LTR copia-type)
TRINITY_DN12573_c0_g1		33.9567	12.36	2.16	13.53	18.1733	8.8533	30	7.0067	PREDICTED: uncharacterized protein LOC109362997 isoform X2 [Lupinus angustifolius] >XP_019464682.1 PREDICTED: uncharacterized protein LOC109362997 isoform X3 [Lupinus angustifolius]	ENOG4111793(Universal stress protein family)	sp|Q9FKG5|PUB51_ARATH(U-box domain-containing protein 51 OS=Arabidopsis thaliana OX=3702 GN=PUB51 PE=2 SV=2)	PF00582(Usp:Universal stress protein family)
TRINITY_DN12575_c0_g1		18.7	5.5567	1.4167	7.1867	8.3533	4.9267	13.7433	2.1567	PREDICTED: uncharacterized protein LOC109355531 isoform X2 [Lupinus angustifolius]	ENOG4112BYV(peptidoglycan-binding, domain containing)
TRINITY_DN12575_c0_g2		13.8467	3.8367	0.8867	4.7967	7.3767	6.12	13.8467	1.83	PREDICTED: uncharacterized protein LOC109355531 isoform X1 [Lupinus angustifolius] >OIW05623.1 hypothetical protein TanjilG_23409 [Lupinus angustifolius]	ENOG4112BYV(peptidoglycan-binding, domain containing)	sp|Q3KPL3|LYSM2_XENLA(LysM and putative peptidoglycan-binding domain-containing protein 2 OS=Xenopus laevis OX=8355 GN=lysmd2 PE=2 SV=2)	PF01476(LysM:LysM domain)
TRINITY_DN12575_c1_g1		78.4033	23.59	4.53	20.0433	34.1867	15.9533	59.1967	11.5367	PREDICTED: uncharacterized serine-rich protein C215.13-like [Lupinus angustifolius]	ENOG4112BYV(peptidoglycan-binding, domain containing)		PF01476(LysM:LysM domain)
TRINITY_DN12579_c0_g1		1.51	0.5767	2.6667	1.6133	1.35	5.0733	1.9367	4.3967	PREDICTED: uncharacterized protein LOC109331511 [Lupinus angustifolius] >OIV94560.1 hypothetical protein TanjilG_25622 [Lupinus angustifolius]	ENOG410YWBG(-)
TRINITY_DN12580_c0_g1		72.7067	25.0967	4.1867	29.02	40.48	18.96	55.7867	14.1833	PREDICTED: receptor-like cytosolic serine/threonine-protein kinase RBK2 [Lupinus angustifolius]	COG0515(Serine Threonine protein kinase)	sp|Q8RXC8|RBK2_ARATH(Receptor-like cytosolic serine/threonine-protein kinase RBK2 OS=Arabidopsis thaliana OX=3702 GN=RBK2 PE=1 SV=1)	PF00069(Pkinase:Protein kinase domain); PF07714(Pkinase_Tyr:Protein tyrosine kinase)
TRINITY_DN12585_c0_g2		2.73	4	4.8867	3.3633	0.7267	0.8467	0.9167	3.6133	PREDICTED: uncharacterized protein LOC109361012 [Lupinus angustifolius] >OIW02463.1 hypothetical protein TanjilG_05056 [Lupinus angustifolius]	ENOG410XRFI(triglyceride lipase activity)
TRINITY_DN12587_c0_g1		3.71	3.06	2.2267	0	4.97	7.52	4.6067	4.1233	PREDICTED: uncharacterized protein LOC109335647 isoform X2 [Lupinus angustifolius]
TRINITY_DN12600_c0_g2		0.7133	2.2933	1.01	1.3933	2.02	0.0367	2.47	0.9633	cleft lip and palate transmembrane protein 1 homolog isoform X2 [Asparagus officinalis] >ONK77380.1 uncharacterized protein A4U43_C02F5930 [Asparagus officinalis]	ENOG410XPEV(cleft lip and palate)	sp|Q54RJ1|CNRB_DICDI(CLPTM1-like membrane protein cnrB OS=Dictyostelium discoideum OX=44689 GN=cnrB PE=3 SV=1)	PF05602(CLPTM1:Cleft lip and palate transmembrane protein 1 (CLPTM1))
TRINITY_DN12602_c0_g2		12.8933	4.07	1.03	4.9	6.8433	4	9.91	2.4167	PREDICTED: protein psi1-like [Lupinus angustifolius]	COG0484(ATP binding to DnaK triggers the release of the substrate protein, thus completing the reaction cycle. Several rounds of ATP-dependent interactions between DnaJ, DnaK and GrpE are required for fully efficient folding. Also involved, together with DnaK and GrpE, in the DNA replication of plasmids through activation of initiation proteins (By similarity))	sp|P59910|DJB13_HUMAN(DnaJ homolog subfamily B member 13 OS=Homo sapiens OX=9606 GN=DNAJB13 PE=1 SV=1)	PF01556(DnaJ_C:DnaJ C terminal domain)
TRINITY_DN12612_c0_g1		19.9333	13.2833	11.4667	5.4133	0.97	0.0433	3.9433	15.6
TRINITY_DN1261_c0_g1		6.0167	3.8333	6.6067	3.69	9.87	12.7433	5.39	7.4367	PREDICTED: uncharacterized protein LOC109329402 [Lupinus angustifolius]		sp|P0C2F6|RNHX1_ARATH(Putative ribonuclease H protein At1g65750 OS=Arabidopsis thaliana OX=3702 GN=At1g65750 PE=3 SV=1)	PF13966(zf-RVT:zinc-binding in reverse transcriptase); PF13456(RVT_3:Reverse transcriptase-like)
TRINITY_DN1261_c0_g2		1.73	3.5133	0.8133	2.17	12.2367	9.7033	0.26	3.4867	PREDICTED: uncharacterized protein LOC109337509 [Lupinus angustifolius]			PF13456(RVT_3:Reverse transcriptase-like)
TRINITY_DN12620_c0_g1		0.8567	1.8467	0.53	0.19	2.6967	1.7367	1.87	0.3867
TRINITY_DN12631_c0_g1		0.0433	0.5933	1.0533	0.4167	0.2467	0.4633	0.2167	0.1733	PREDICTED: RING-H2 finger protein ATL63-like [Lupinus angustifolius] >OIW16497.1 hypothetical protein TanjilG_32167 [Lupinus angustifolius]	ENOG41121N2(zinc ion binding)	sp|Q9LUZ9|ATL63_ARATH(RING-H2 finger protein ATL63 OS=Arabidopsis thaliana OX=3702 GN=ATL63 PE=2 SV=1)	PF13639(zf-RING_2:Ring finger domain); PF17123(zf-RING_11:RING-like zinc finger); PF13923(zf-C3HC4_2:Zinc finger, C3HC4 type (RING finger)); PF12678(zf-rbx1:RING-H2 zinc finger domain); PF00097(zf-C3HC4:Zinc finger, C3HC4 type (RING finger)); PF13445(zf-RING_UBOX:RING-type zinc-finger); PF13920(zf-C3HC4_3:Zinc finger, C3HC4 type (RING finger)); PF14634(zf-RING_5:zinc-RING finger domain); PF12861(…
TRINITY_DN12631_c1_g1		0.0633	0.3933	1.2567	1.6467	0.54	0.7267	0.3033	0.8033	PREDICTED: RING-H2 finger protein ATL63-like [Lupinus angustifolius] >OIV95515.1 hypothetical protein TanjilG_25186 [Lupinus angustifolius]	ENOG41121N2(Domain-Containing protein)	sp|Q9LZJ6|ATL5_ARATH(RING-H2 finger protein ATL5 OS=Arabidopsis thaliana OX=3702 GN=ATL5 PE=2 SV=1)	PF13639(zf-RING_2:Ring finger domain); PF13923(zf-C3HC4_2:Zinc finger, C3HC4 type (RING finger)); PF17123(zf-RING_11:RING-like zinc finger); PF12678(zf-rbx1:RING-H2 zinc finger domain); PF13920(zf-C3HC4_3:Zinc finger, C3HC4 type (RING finger)); PF14634(zf-RING_5:zinc-RING finger domain); PF00097(zf-C3HC4:Zinc finger, C3HC4 type (RING finger)); PF13445(zf-RING_UBOX:RING-type zinc-finger)
TRINITY_DN12635_c0_g1		0.7133	0.6333	0.1467	0.3233	0.78	1.1267	1.5133	0.7233	hypothetical protein TanjilG_05110 [Lupinus angustifolius]	ENOG410Y990(snf1-related protein kinase regulatory subunit)	sp|Q8LBB2|KING1_ARATH(SNF1-related protein kinase regulatory subunit gamma-1 OS=Arabidopsis thaliana OX=3702 GN=KING1 PE=1 SV=2)	PF00571(CBS:CBS domain)
TRINITY_DN12636_c0_g1		1.6867	3.6533	4.9933	2.8533	3.23	1.88	3.1367	9.2167	PREDICTED: uncharacterized protein LOC109354214 [Lupinus angustifolius] >OIW07370.1 hypothetical protein TanjilG_10205 [Lupinus angustifolius]	ENOG410YPWD(EF hand family protein)		PF13499(EF-hand_7:EF-hand domain pair); PF00036(EF-hand_1:EF hand); PF13202(EF-hand_5:EF hand); PF13405(EF-hand_6:EF-hand domain)
TRINITY_DN12643_c0_g1		4.15	4.0067	1.6133	2.4	0.9033	1.1667	19.7567	7.6367	PREDICTED: fasciclin-like arabinogalactan protein 13 [Lupinus angustifolius] >OIW20576.1 hypothetical protein TanjilG_15381 [Lupinus angustifolius]	ENOG410YJJE(fasciclin-like arabinogalactan protein)	sp|Q9ZWA8|FLA9_ARATH(Fasciclin-like arabinogalactan protein 9 OS=Arabidopsis thaliana OX=3702 GN=FLA9 PE=2 SV=1)	PF02469(Fasciclin:Fasciclin domain)
TRINITY_DN12646_c0_g1		1.0867	2.9433	12.0967	1.1967	3.5	1.4767	1.8533	9.05	PREDICTED: peroxidase 55 [Lupinus angustifolius] >XP_019458773.1 PREDICTED: peroxidase 55-like [Lupinus angustifolius]	ENOG410YDU7(peroxidase)	sp|Q96509|PER55_ARATH(Peroxidase 55 OS=Arabidopsis thaliana OX=3702 GN=PER55 PE=1 SV=1)	PF00141(peroxidase:Peroxidase)
TRINITY_DN1265_c0_g3		0	0	1.2633	0.5333	0	0	0.3633	0.14	PREDICTED: trihelix transcription factor GT-2-like [Cucumis sativus] >KGN46017.1 hypothetical protein Csa_6G043490 [Cucumis sativus]	ENOG410YYXY(Transcription factor)	sp|Q39117|TGT2_ARATH(Trihelix transcription factor GT-2 OS=Arabidopsis thaliana OX=3702 GN=GT-2 PE=2 SV=1)	PF13837(Myb_DNA-bind_4:Myb/SANT-like DNA-binding domain)
TRINITY_DN12665_c0_g1		0	2.96	3.5233	0.5567	0.0267	4.28	0.9267	0.1867	PREDICTED: uncharacterized protein LOC109341583 [Lupinus angustifolius]
TRINITY_DN1266_c0_g1		0.9033	0.9667	1.1633	4.0333	0.6867	0.6167	1.4533	1.0967
TRINITY_DN12682_c0_g1		2.4467	1.0967	0.1767	0.4633	0.8	0.7033	1.1833	0.5867	PREDICTED: RHOMBOID-like protein 8 [Lupinus angustifolius] >OIV97911.1 hypothetical protein TanjilG_12668 [Lupinus angustifolius]	COG0705(rhomboid family)	sp|F4I8K2|RBL8_ARATH(RHOMBOID-like protein 8 OS=Arabidopsis thaliana OX=3702 GN=KOM PE=2 SV=1)	PF01694(Rhomboid:Rhomboid family)
TRINITY_DN1268_c0_g1		11.69	4.4433	2.22	3.63	4.3633	4.0867	6.1133	2.9533				PF15811(SVIP:Small VCP/p97-interacting protein)
TRINITY_DN12692_c0_g1		51.4733	28.56	12.51	5.36	0	8.0533	13.78	21.8733	hypothetical protein TanjilG_11472 [Lupinus angustifolius]	ENOG4111SJN(Transcription factor)	sp|E3SXU4|BHLHW_PEA(Basic helix-loop-helix protein A OS=Pisum sativum OX=3888 GN=BHLH PE=3 SV=1)
TRINITY_DN12698_c0_g1		51.2233	156.603	261.033	106.927	95.2167	223.853	103.073	172.447	PREDICTED: cytochrome P450 83B1-like [Lupinus angustifolius]	COG2124(Cytochrome p450)	sp|O65782|C83B1_ARATH(Cytochrome P450 83B1 OS=Arabidopsis thaliana OX=3702 GN=CYP83B1 PE=1 SV=1)	PF00067(p450:Cytochrome P450)
TRINITY_DN126_c0_g1		3.5933	0.63	0.02	2.21	0	0	0.02	2.71	hypothetical protein TanjilG_04877 [Lupinus angustifolius]			PF04554(Extensin_2:Extensin-like region)
TRINITY_DN12706_c0_g1		0.49	1.8333	2.1467	1.5567	1.6267	2.2233	2.82	1.7567	PREDICTED: kynurenine--oxoglutarate transaminase 1-like [Lupinus angustifolius] >OIW07018.1 hypothetical protein TanjilG_02652 [Lupinus angustifolius]	COG0436(Cold acclimation protein)	sp|P77806|YBDL_ECOLI(Methionine aminotransferase OS=Escherichia coli (strain K12) OX=83333 GN=ybdL PE=1 SV=1)	PF00155(Aminotran_1_2:Aminotransferase class I and II)
TRINITY_DN12709_c0_g1		0.38	0.34	0.6733	0.28	0.6233	0.85	0.3733	0.0567	PREDICTED: uncharacterized protein LOC109347473 [Lupinus angustifolius] >OIW12282.1 hypothetical protein TanjilG_06071 [Lupinus angustifolius]	COG1403(HNH endonuclease)		PF14279(HNH_5:HNH endonuclease); PF01844(HNH:HNH endonuclease)
TRINITY_DN12710_c0_g1		58.4633	14.3933	34.27	16.2267	12.0967	7.1567	17.4533	12.1867	PREDICTED: ribulose bisphosphate carboxylase small chain clone 512-like [Lupinus angustifolius] >OIW19419.1 hypothetical protein TanjilG_09439 [Lupinus angustifolius]	COG4451(RuBisCO catalyzes two reactions the carboxylation of D- ribulose 1,5-bisphosphate, the primary event in carbon dioxide fixation, as well as the oxidative fragmentation of the pentose substrate. Both reactions occur simultaneously and in competition at the same active site)	sp|O64416|RBS_MARPA(Ribulose bisphosphate carboxylase small chain, chloroplastic OS=Marchantia paleacea OX=56867 GN=RBCS PE=2 SV=1)	PF00101(RuBisCO_small:Ribulose bisphosphate carboxylase, small chain)
TRINITY_DN12712_c0_g1		1.5967	1.7667	6.92	2.7833	1.49	7.3867	6.4667	11.6667	PREDICTED: protein PIN-LIKES 3-like isoform X2 [Lupinus angustifolius]	COG0679(Auxin Efflux Carrier)	sp|F4HWB6|PILS1_ARATH(Protein PIN-LIKES 1 OS=Arabidopsis thaliana OX=3702 GN=PILS1 PE=2 SV=1)	PF03547(Mem_trans:Membrane transport protein)
TRINITY_DN12715_c0_g1		14.47	5.37	0.9933	8.6533	8.6467	2.98	17.31	3.85	hypothetical protein TanjilG_05008 [Lupinus angustifolius]
TRINITY_DN1272_c0_g1		1.6567	2.4233	4.2333	1.2867	3.33	0.8833	2.51	1.27	hypothetical protein TanjilG_06411 [Lupinus angustifolius]	COG5169(Transcription factor)	sp|Q9LIL4|P24B3_ARATH(Transmembrane emp24 domain-containing protein p24beta3 OS=Arabidopsis thaliana OX=3702 GN=At3g22845 PE=2 SV=1)
TRINITY_DN1272_c0_g2		0.0733	0.26	6.9133	0.71	0.1967	0.2467	0.24	0.4933	PREDICTED: heat stress transcription factor A-7a-like [Lupinus angustifolius] >OIW11280.1 hypothetical protein TanjilG_28371 [Lupinus angustifolius]	COG5169(Transcription factor)	sp|Q9LUH8|HFA6B_ARATH(Heat stress transcription factor A-6b OS=Arabidopsis thaliana OX=3702 GN=HSFA6b PE=2 SV=1)	PF00447(HSF_DNA-bind:HSF-type DNA-binding)
TRINITY_DN12734_c0_g1		0.04	0	0.89	0.1233	0.0833	3.5733	1.2867	1.6867	PREDICTED: uncharacterized protein LOC109344625 [Lupinus angustifolius]		sp|P0C2F6|RNHX1_ARATH(Putative ribonuclease H protein At1g65750 OS=Arabidopsis thaliana OX=3702 GN=At1g65750 PE=3 SV=1)	PF00078(RVT_1:Reverse transcriptase (RNA-dependent DNA polymerase)); PF13966(zf-RVT:zinc-binding in reverse transcriptase); PF13456(RVT_3:Reverse transcriptase-like); PF00075(RNase_H:RNase H)
TRINITY_DN12734_c0_g2		0.8567	1	0.4533	0.62	0.4767	1.65	0.0333	0.2733	PREDICTED: uncharacterized protein LOC109350537 [Lupinus angustifolius]		sp|P0C2F6|RNHX1_ARATH(Putative ribonuclease H protein At1g65750 OS=Arabidopsis thaliana OX=3702 GN=At1g65750 PE=3 SV=1)	PF13456(RVT_3:Reverse transcriptase-like); PF13966(zf-RVT:zinc-binding in reverse transcriptase); PF00075(RNase_H:RNase H)
TRINITY_DN12736_c0_g1		124.7	0	0	26.6467	0	41.6367	40.13	0	hypothetical protein TanjilG_10871 [Lupinus angustifolius]	ENOG410XQUQ(-)
TRINITY_DN12738_c0_g1		2.0667	0.2067	0.11	1.0833	0.2333	0	2.7067	0.27	PREDICTED: early nodulin-like protein 1 [Lupinus angustifolius] >OIW20993.1 hypothetical protein TanjilG_27338 [Lupinus angustifolius]
TRINITY_DN12740_c0_g1		454.843	482.06	83.8033	432.293	849.703	123.73	252.313	31.02	PREDICTED: LOW QUALITY PROTEIN: tropinone reductase homolog [Lupinus angustifolius]	COG1028(Dehydrogenase reductase); ENOG410XQUW(short-chain dehydrogenase reductase)	sp|Q9LHT0|TRNHF_ARATH(Tropinone reductase homolog At5g06060 OS=Arabidopsis thaliana OX=3702 GN=At5g06060 PE=2 SV=1)	PF00106(adh_short:short chain dehydrogenase); PF13561(adh_short_C2:Enoyl-(Acyl carrier protein) reductase)
TRINITY_DN1274_c0_g1		31.08	15.0433	15.6633	21.8367	26.8767	9.1333	35.8767	48.57	PREDICTED: inorganic pyrophosphatase 2-like [Lupinus angustifolius] >OIW17180.1 hypothetical protein TanjilG_18135 [Lupinus angustifolius]	ENOG4111NAQ(Phosphatase)	sp|Q9FZ62|PPSP2_ARATH(Inorganic pyrophosphatase 2 OS=Arabidopsis thaliana OX=3702 GN=At1g17710 PE=2 SV=1)	PF06888(Put_Phosphatase:Putative Phosphatase); PF12710(HAD:haloacid dehalogenase-like hydrolase)
TRINITY_DN12752_c0_g3		0.41	2.39	0.6333	1.09	0	0.1167	4.8967	0.9833	PREDICTED: uncharacterized protein LOC109341312 [Lupinus angustifolius] >XP_019434733.1 PREDICTED: uncharacterized protein LOC109341312 [Lupinus angustifolius] >XP_019434734.1 PREDICTED: uncharacterized protein LOC109341312 [Lupinus angustifolius] >OIV89387.1 hypothetical protein TanjilG_22350 [Lupinus angustifolius]	ENOG410XNXX(Protein of unknown function (DUF810))	sp|Q8RX56|UNC13_ARATH(Protein unc-13 homolog OS=Arabidopsis thaliana OX=3702 GN=PATROL1 PE=2 SV=1)	PF05664(DUF810:Plant family of unknown function (DUF810))
TRINITY_DN12775_c1_g1		7.11	0.8867	0	5.5933	1.1433	0	3.1767	3.7567	PREDICTED: transcriptional corepressor SEUSS-like isoform X1 [Lupinus angustifolius] >XP_019434290.1 PREDICTED: transcriptional corepressor SEUSS-like isoform X1 [Lupinus angustifolius] >XP_019434291.1 PREDICTED: transcriptional corepressor SEUSS-like isoform X1 [Lupinus angustifolius] >OIW21960.1 hypothetical protein TanjilG_18101 [Lupinus angustifolius]	ENOG410XT7C(-)	sp|Q8W234|SEUSS_ARATH(Transcriptional corepressor SEUSS OS=Arabidopsis thaliana OX=3702 GN=SEU PE=1 SV=1)	PF01803(LIM_bind:LIM-domain binding protein)
TRINITY_DN12777_c0_g1		3.6767	4.6633	8.2933	15.4333	3.4167	3.0433	6.69	7.6967	hypothetical protein TanjilG_19963 [Lupinus angustifolius]	COG0513(purine NTP-dependent helicase activity)	sp|Q650T9|RH7_ORYSJ(DEAD-box ATP-dependent RNA helicase 7 OS=Oryza sativa subsp. japonica OX=39947 GN=Os09g0520700 PE=2 SV=1)	PF08152(GUCT:GUCT (NUC152) domain)
TRINITY_DN1277_c0_g1		53.7467	18.8933	3.8133	20.2133	29.87	14.4233	39.18	10.89	PREDICTED: probable serine/threonine-protein kinase At1g54610 isoform X1 [Lupinus angustifolius]	ENOG410XPIR(Cyclin-Dependent Kinase)	sp|F4ICB6|IBS1_ARATH(Protein IMPAIRED IN BABA-INDUCED STERILITY 1 OS=Arabidopsis thaliana OX=3702 GN=IBS1 PE=3 SV=1)	PF00069(Pkinase:Protein kinase domain); PF07714(Pkinase_Tyr:Protein tyrosine kinase); PF14531(Kinase-like:Kinase-like)
TRINITY_DN12780_c0_g2		10.64	59.45	28.7867	46.8767	16.9567	5.9167	18.6	54.48	PREDICTED: trans-resveratrol di-O-methyltransferase-like [Lupinus angustifolius] >XP_019432215.1 PREDICTED: trans-resveratrol di-O-methyltransferase-like [Lupinus angustifolius] >OIW16088.1 hypothetical protein TanjilG_18803 [Lupinus angustifolius]	ENOG410XS7T(o-methyltransferase)	sp|B0ZB57|OMT3_HUMLU(Probable O-methyltransferase 3 OS=Humulus lupulus OX=3486 GN=OMT3 PE=2 SV=1)	PF00891(Methyltransf_2:O-methyltransferase domain)
TRINITY_DN12783_c0_g1		88.34	18.4467	17.7333	62.3767	27.5233	17.7	120.37	25.2933	PREDICTED: protein trichome birefringence-like 19 [Lupinus angustifolius] >OIW06514.1 hypothetical protein TanjilG_26703 [Lupinus angustifolius]	ENOG410YG6N(Pfam:DUF231)	sp|Q9LFT0|TBL19_ARATH(Protein trichome birefringence-like 19 OS=Arabidopsis thaliana OX=3702 GN=TBL19 PE=3 SV=1)	PF13839(PC-Esterase:GDSL/SGNH-like Acyl-Esterase family found in Pmr5 and Cas1p); PF14416(PMR5N:PMR5 N terminal Domain)
TRINITY_DN12788_c0_g1		126.367	35.93	2.4133	25.9933	48.7533	20.42	117.007	20.26	PREDICTED: mavicyanin-like [Lupinus angustifolius]	ENOG410YXHA(Plastocyanin-like domain)	sp|Q9SK27|ENL1_ARATH(Early nodulin-like protein 1 OS=Arabidopsis thaliana OX=3702 GN=At2g25060 PE=2 SV=2)	PF02298(Cu_bind_like:Plastocyanin-like domain)
TRINITY_DN12795_c0_g2		0.1867	0.7133	0.5833	0.05	0.27	0.1467	0.4467	0.3133
TRINITY_DN12805_c0_g1		1.6067	0.3933	0.0867	0.3233	0.88	0.15	0.8867	0.31	PREDICTED: callose synthase 12-like [Lupinus angustifolius] >OIV89498.1 hypothetical protein TanjilG_20432 [Lupinus angustifolius]	ENOG410XQ8V(synthase)	sp|Q9ZT82|CALSC_ARATH(Callose synthase 12 OS=Arabidopsis thaliana OX=3702 GN=CALS12 PE=2 SV=1)	PF02364(Glucan_synthase:1,3-beta-glucan synthase component); PF14288(FKS1_dom1:1,3-beta-glucan synthase subunit FKS1, domain-1)
TRINITY_DN1280_c1_g2		7.52	2.6033	0.48	2.4033	3.8933	1.8767	5.4567	2.2267	PREDICTED: myosin-6-like isoform X1 [Lupinus angustifolius] >OIW01874.1 hypothetical protein TanjilG_31056 [Lupinus angustifolius]	COG5022(Auxin-induced protein)	sp|F4I460|MYO8_ARATH(Myosin-8 OS=Arabidopsis thaliana OX=3702 GN=XI-B PE=3 SV=1)	PF00063(Myosin_head:Myosin head (motor domain)); PF00612(IQ:IQ calmodulin-binding motif); PF02736(Myosin_N:Myosin N-terminal SH3-like domain); PF13191(AAA_16:AAA ATPase domain)
TRINITY_DN12815_c1_g2		0.1967	0.17	1.08	0.53	0.4	1.82	0.2367	0.7667	PREDICTED: DUF724 domain-containing protein 3 [Lupinus angustifolius] >OIV99178.1 hypothetical protein TanjilG_19674 [Lupinus angustifolius]	ENOG410YVCW(Agenet domain)	sp|Q500V5|AGDP1_ARATH(Protein AGENET DOMAIN (AGD)-CONTAINING P1 OS=Arabidopsis thaliana OX=3702 GN=AGDP1 PE=1 SV=1)	PF05641(Agenet:Agenet domain)
TRINITY_DN12818_c0_g2		0	36.49	10.6867	20.7133	10.6833	45.0867	8.8033	33.8367
TRINITY_DN12825_c0_g1		29.1033	10	1.6133	10.22	10.89	7.2233	21.6767	4.7	PREDICTED: deSI-like protein At4g17486 [Lupinus angustifolius]	ENOG4111H3Z(BTB POZ domain-containing protein)	sp|Q93VG8|PPDEX_ARATH(DeSI-like protein At4g17486 OS=Arabidopsis thaliana OX=3702 GN=At4g17486 PE=2 SV=1)	PF05903(Peptidase_C97:PPPDE putative peptidase domain)
TRINITY_DN1282_c0_g1		1.8567	8.44	60.6267	11.5	6.3133	12.5433	13.98	13.5033	PREDICTED: cellulose synthase-like protein H1 isoform X3 [Lupinus angustifolius]	COG1215(Glycosyl transferase, family 2)
TRINITY_DN12856_c0_g2		0.25	5.7833	4.0233	2.1133	1.22	1.62	2.02	2.2267	PREDICTED: uncharacterized protein At1g01500-like [Lupinus angustifolius] >XP_019443193.1 PREDICTED: uncharacterized protein At1g01500-like [Lupinus angustifolius] >XP_019443194.1 PREDICTED: uncharacterized protein At1g01500-like [Lupinus angustifolius] >XP_019443195.1 PREDICTED: uncharacterized protein At1g01500-like [Lupinus angustifolius] >XP_019443196.1 PREDICTED: uncharacterized protein At1g…	ENOG410YCHA(-)	sp|Q8GUH2|Y1015_ARATH(Uncharacterized protein At1g01500 OS=Arabidopsis thaliana OX=3702 GN=At1g01500 PE=2 SV=1)
TRINITY_DN12864_c0_g1		1.15	0.3767	0.38	0.4367	0.38	0.16	1.4067	0.2567	PREDICTED: probable BOI-related E3 ubiquitin-protein ligase 2 isoform X2 [Lupinus angustifolius]	ENOG4111S1X(protein binding zinc ion binding)	sp|Q9FHE4|BRG1_ARATH(BOI-related E3 ubiquitin-protein ligase 1 OS=Arabidopsis thaliana OX=3702 GN=BRG1 PE=1 SV=1)	PF13920(zf-C3HC4_3:Zinc finger, C3HC4 type (RING finger))
TRINITY_DN12877_c0_g1		0.13	1.2733	3.6067	0.5733	5.8933	7.1733	4.0667	0.4367	PREDICTED: glycine-rich RNA-binding protein 2, mitochondrial-like [Lupinus angustifolius] >XP_019438280.1 PREDICTED: glycine-rich RNA-binding protein 2, mitochondrial-like [Lupinus angustifolius] >OIW14686.1 hypothetical protein TanjilG_33028 [Lupinus angustifolius]	COG0724(Rna-binding protein); COG2157(Rna-binding protein)	sp|Q9SVM8|RBG2_ARATH(Glycine-rich RNA-binding protein 2, mitochondrial OS=Arabidopsis thaliana OX=3702 GN=RBG2 PE=1 SV=1)	PF00076(RRM_1:RNA recognition motif. (a.k.a. RRM, RBD, or RNP domain))
TRINITY_DN12878_c0_g1		1.1667	1.1267	2.7567	1.2633	0.9533	2.32	0.79	1.37	PREDICTED: uncharacterized protein LOC109326391 [Lupinus angustifolius]			PF03732(Retrotrans_gag:Retrotransposon gag protein)
TRINITY_DN12880_c0_g1		17.7167	9.5333	4.5533	2.1867	2.98	4.95	25.2267	18.1533	hypothetical protein TanjilG_15857 [Lupinus angustifolius]	ENOG410Y5VH(3-ketoacyl-coa synthase)	sp|Q9XF43|KCS6_ARATH(3-ketoacyl-CoA synthase 6 OS=Arabidopsis thaliana OX=3702 GN=CUT1 PE=1 SV=1)	PF08392(FAE1_CUT1_RppA:FAE1/Type III polyketide synthase-like protein)
TRINITY_DN12883_c0_g1		2.5567	5.1133	8.3033	7.5	6.3667	1.19	3.1	4.1267	PREDICTED: SH3 domain-containing protein 2-like [Lupinus angustifolius] >OIW14740.1 hypothetical protein TanjilG_05361 [Lupinus angustifolius]	ENOG4110148(Domain of unknown function (DUF3411))	sp|Q8VWF1|SH3P2_ARATH(SH3 domain-containing protein 2 OS=Arabidopsis thaliana OX=3702 GN=SH3P2 PE=1 SV=1)
TRINITY_DN12885_c0_g1		63.29	15.7233	2.7467	21.4	29.6967	14.3767	55.21	9.4933	PREDICTED: exopolygalacturonase-like [Lupinus angustifolius]	ENOG410XS6X(Exo-polygalacturonase)	sp|Q39766|PGLR_GOSBA(Polygalacturonase OS=Gossypium barbadense OX=3634 GN=G9 PE=2 SV=1)	PF00295(Glyco_hydro_28:Glycosyl hydrolases family 28); PF12708(Pectate_lyase_3:Pectate lyase superfamily protein)
TRINITY_DN12886_c1_g1		0.3867	1.7567	7.9567	2.2367	0.6533	1.8533	1.5867	3.47	PREDICTED: endonuclease 2 [Lupinus angustifolius] >OIW03579.1 hypothetical protein TanjilG_30999 [Lupinus angustifolius]	ENOG4111UE2(S1 P1 Nuclease)	sp|Q9C9G4|ENDO2_ARATH(Endonuclease 2 OS=Arabidopsis thaliana OX=3702 GN=ENDO2 PE=1 SV=1)	PF02265(S1-P1_nuclease:S1/P1 Nuclease)
TRINITY_DN12888_c0_g1		22.32	110.033	81.1333	140.347	166.573	2.5633	18.52	83.6167
TRINITY_DN12894_c0_g1		0.9533	2.4267	5.02	2.5267	1.8633	4.3367	1.9233	1.01	PREDICTED: transcription factor TGA2.2-like isoform X1 [Lupinus angustifolius]	ENOG410YG7S(Transcription factor)	sp|Q9SX27|PAN_ARATH(Transcription factor PERIANTHIA OS=Arabidopsis thaliana OX=3702 GN=PAN PE=1 SV=1)	PF14144(DOG1:Seed dormancy control); PF00170(bZIP_1:bZIP transcription factor); PF07716(bZIP_2:Basic region leucine zipper)
TRINITY_DN12894_c0_g2		0.8333	0.3267	0.8033	0.9567	0.42	1.9967	0.8767	1.3633	hypothetical protein TanjilG_28743 [Lupinus angustifolius]	ENOG410YG7S(Transcription factor)	sp|Q9SX27|PAN_ARATH(Transcription factor PERIANTHIA OS=Arabidopsis thaliana OX=3702 GN=PAN PE=1 SV=1)	PF14144(DOG1:Seed dormancy control)
TRINITY_DN12894_c1_g1		0.39	0.1733	0.87	0.6667	0.5267	1.6667	0.85	0.9767	hypothetical protein TanjilG_28743 [Lupinus angustifolius]	ENOG410YG7S(Transcription factor)	sp|Q6IVC2|TGAL1_ORYSJ(Transcription factor TGAL1 OS=Oryza sativa subsp. japonica OX=39947 GN=TGAL1 PE=1 SV=2)	PF00170(bZIP_1:bZIP transcription factor); PF07716(bZIP_2:Basic region leucine zipper); PF03131(bZIP_Maf:bZIP Maf transcription factor)
TRINITY_DN12896_c0_g1		1.5933	3.3567	4.4767	2.7233	4.3667	1.0367	4.5933	7.25	hypothetical protein TanjilG_30256 [Lupinus angustifolius]	COG0405(gamma-glutamyltransferase activity)	sp|Q9M0G0|GAGT3_ARATH(Glutathione hydrolase 3 OS=Arabidopsis thaliana OX=3702 GN=GGT3 PE=2 SV=1)	PF01019(G_glu_transpept:Gamma-glutamyltranspeptidase)
TRINITY_DN1289_c0_g1		5.13	2.7267	23.1533	3.0667	4.8967	2.8033	15.5967	14.3767	PREDICTED: protein trichome birefringence-like 39 [Lupinus angustifolius] >OIW03391.1 hypothetical protein TanjilG_31838 [Lupinus angustifolius]	ENOG410YAJT(Component of the Mediator complex, a coactivator involved in regulated gene transcription of nearly all RNA polymerase II-dependent genes. Mediator functions as a bridge to convey information from gene-specific regulatory proteins to the basal RNA polymerase II transcription machinery. Mediator is recruited to promoters by direct interactions with regulatory proteins and serves as a s…	sp|Q9SIN2|TBL39_ARATH(Protein trichome birefringence-like 39 OS=Arabidopsis thaliana OX=3702 GN=TBL39 PE=2 SV=1)	PF13839(PC-Esterase:GDSL/SGNH-like Acyl-Esterase family found in Pmr5 and Cas1p); PF14416(PMR5N:PMR5 N terminal Domain)
TRINITY_DN12903_c0_g1		0.67	1.0333	2.2333	0.5367	0.4067	0	0.86	0.64	hypothetical protein TanjilG_09174 [Lupinus angustifolius]
TRINITY_DN12911_c1_g1		2.5667	4.5	4.8233	3.1967	0.38	13.1033	2.56	0.81	PREDICTED: uncharacterized protein LOC109346997 [Lupinus angustifolius]	COG2801(Retrotransposon protein); ENOG410XS4D(Retrotransposon protein)	sp|Q94HW2|POLR1_ARATH(Retrovirus-related Pol polyprotein from transposon RE1 OS=Arabidopsis thaliana OX=3702 GN=RE1 PE=2 SV=1)	PF07727(RVT_2:Reverse transcriptase (RNA-dependent DNA polymerase))
TRINITY_DN12916_c0_g1		2.65	0.51	0.3333	1.0067	0.8333	0.7167	2.16	0.5067	PREDICTED: uncharacterized protein LOC109352530 isoform X1 [Lupinus angustifolius] >OIW07547.1 hypothetical protein TanjilG_08434 [Lupinus angustifolius]	ENOG410YXF6(Zinc finger (C3HC4-type RING finger) family protein)		PF13920(zf-C3HC4_3:Zinc finger, C3HC4 type (RING finger))
TRINITY_DN12916_c1_g1		4.56	1.08	0.3	2.82	1.74	2.0533	3.4733	0.8933	PREDICTED: protein SQS1 [Lupinus angustifolius]	ENOG410YXF6(Zinc finger (C3HC4-type RING finger) family protein)		PF13920(zf-C3HC4_3:Zinc finger, C3HC4 type (RING finger)); PF14447(Prok-RING_4:Prokaryotic RING finger family 4); PF00097(zf-C3HC4:Zinc finger, C3HC4 type (RING finger)); PF13923(zf-C3HC4_2:Zinc finger, C3HC4 type (RING finger)); PF13639(zf-RING_2:Ring finger domain); PF00428(Ribosomal_60s:60s Acidic ribosomal protein)
TRINITY_DN12922_c0_g1		0.91	4.72	3.47	1.2567	1.97	5.2167	1.57	6.1667	PREDICTED: LEAF RUST 10 DISEASE-RESISTANCE LOCUS RECEPTOR-LIKE PROTEIN KINASE-like 2.1 isoform X1 [Lupinus angustifolius] >OIV90028.1 hypothetical protein TanjilG_23948 [Lupinus angustifolius]	COG0515(Serine Threonine protein kinase)
TRINITY_DN12930_c2_g1		6.3367	1.1867	34.0167	1.8867	21.87	21.9	21.2167	5.2167	PREDICTED: calreticulin-like isoform X1 [Lupinus angustifolius] >OIW07093.1 hypothetical protein TanjilG_02727 [Lupinus angustifolius]	ENOG410XRR7(Calreticulin)	sp|O81919|CALR_BETVU(Calreticulin OS=Beta vulgaris OX=161934 PE=2 SV=1)	PF00262(Calreticulin:Calreticulin family)
TRINITY_DN12935_c0_g2		3.3133	18.3667	31.6367	15.85	8.4033	13.5233	15.2967	19.3933	PREDICTED: BAHD acyltransferase DCR-like isoform X1 [Lupinus angustifolius] >OIW08042.1 hypothetical protein TanjilG_20143 [Lupinus angustifolius]	ENOG410YJA8(Trichothecene 3-O-acetyltransferase)	sp|Q9FF86|DCR_ARATH(BAHD acyltransferase DCR OS=Arabidopsis thaliana OX=3702 GN=DCR PE=2 SV=1)	PF02458(Transferase:Transferase family)
TRINITY_DN12939_c0_g1		22.5467	32.7533	24.36	14.9567	17.5433	0.78	14.9267	0.8233
TRINITY_DN12945_c0_g1		306.213	99.4933	18.4667	107.95	160.87	83.0533	202.127	53.35	PREDICTED: polcalcin Che a 3-like [Lupinus angustifolius] >OIW02672.1 hypothetical protein TanjilG_29448 [Lupinus angustifolius]	COG5126(Calcium-binding protein); COG5126(Calcium-binding protein); COG5126(Calcium-binding protein)	sp|Q8VWY6|POLC1_TOBAC(Polcalcin Nic t 1 OS=Nicotiana tabacum OX=4097 GN=Nict1 PE=1 SV=1)	PF00036(EF-hand_1:EF hand); PF13499(EF-hand_7:EF-hand domain pair); PF13405(EF-hand_6:EF-hand domain); PF13202(EF-hand_5:EF hand); PF13833(EF-hand_8:EF-hand domain pair)
TRINITY_DN12950_c0_g1		28.15	8.91	3.3867	10.1967	15.1167	8.2967	20.3067	5.9833	PREDICTED: uncharacterized protein LOC109337169 [Lupinus angustifolius] >XP_019429625.1 PREDICTED: uncharacterized protein LOC109337169 [Lupinus angustifolius] >XP_019429626.1 PREDICTED: uncharacterized protein LOC109337169 [Lupinus angustifolius] >XP_019429627.1 PREDICTED: uncharacterized protein LOC109337169 [Lupinus angustifolius] >XP_019429629.1 PREDICTED: uncharacterized protein LOC109337169…	ENOG410YCMM(expressed protein)		PF05623(DUF789:Protein of unknown function (DUF789))
TRINITY_DN12955_c0_g1		4.06	1.0633	0.3467	1.3567	1.41	0.92	3.48	0.7467	PREDICTED: U-box domain-containing protein 35-like [Lupinus angustifolius]	COG0515(Serine Threonine protein kinase)	sp|Q8S8S7|PUB34_ARATH(U-box domain-containing protein 34 OS=Arabidopsis thaliana OX=3702 GN=PUB34 PE=3 SV=1)	PF00069(Pkinase:Protein kinase domain); PF07714(Pkinase_Tyr:Protein tyrosine kinase)
TRINITY_DN12964_c0_g1		5.8133	2.5533	0.7033	1.27	2.1767	1.67	3.0867	1.7633	PREDICTED: amino acid permease 3-like [Lupinus angustifolius] >XP_019430507.1 PREDICTED: amino acid permease 3-like [Lupinus angustifolius] >XP_019430510.1 PREDICTED: amino acid permease 3-like [Lupinus angustifolius] >OIW16631.1 hypothetical protein TanjilG_01870 [Lupinus angustifolius]	COG0814(amino acid transport)	sp|Q39134|AAP3_ARATH(Amino acid permease 3 OS=Arabidopsis thaliana OX=3702 GN=AAP3 PE=1 SV=2)	PF01490(Aa_trans:Transmembrane amino acid transporter protein)
TRINITY_DN12965_c0_g1		0.5367	2.3733	2.6533	1.4267	1.5933	2.1567	1.6833	1.3233	PREDICTED: transcription repressor OFP1-like [Lupinus angustifolius] >OIV98546.1 hypothetical protein TanjilG_12132 [Lupinus angustifolius]	ENOG410YV5M(DUF623 domain containing protein, expressed)	sp|O04351|OFP2_ARATH(Transcription repressor OFP2 OS=Arabidopsis thaliana OX=3702 GN=OFP2 PE=1 SV=1)	PF04844(Ovate:Transcriptional repressor, ovate); PF13724(DNA_binding_2:DNA-binding domain)
TRINITY_DN12977_c0_g2		1.9	10.3267	17.45	13.11	3.6733	15.7433	8.1033	9.96	PREDICTED: chlorophyll a-b binding protein CP26, chloroplastic-like [Lupinus angustifolius] >OIV98947.1 hypothetical protein TanjilG_07382 [Lupinus angustifolius]	ENOG41110WY(Chlorophyll A-B binding protein)	sp|Q9XF89|CB5_ARATH(Chlorophyll a-b binding protein CP26, chloroplastic OS=Arabidopsis thaliana OX=3702 GN=LHCB5 PE=1 SV=1)	PF00504(Chloroa_b-bind:Chlorophyll A-B binding protein)
TRINITY_DN12978_c0_g1		4.1	6.09	0.2233	1.7	4.6133	8.6167	4.81	3.08	PREDICTED: actin-97-like [Lupinus angustifolius] >XP_019456336.1 PREDICTED: actin-97-like [Lupinus angustifolius] >XP_019456337.1 PREDICTED: actin-97-like [Lupinus angustifolius] >OIW05491.1 hypothetical protein TanjilG_27621 [Lupinus angustifolius]	COG5277(Actin-related protein)	sp|P30171|ACT11_SOLTU(Actin-97 OS=Solanum tuberosum OX=4113 GN=AC97 PE=3 SV=1)	PF00022(Actin:Actin)
TRINITY_DN12978_c0_g3		112.21	23.58	5.15	10.42	0	17.58	79.09	30.01	actin, partial [Phaseolus acutifolius]	COG5277(Actin-related protein)	sp|Q96484|ACT3_SOLLC(Actin-52 (Fragment) OS=Solanum lycopersicum OX=4081 PE=3 SV=1)	PF00022(Actin:Actin)
TRINITY_DN12982_c0_g1		3.0033	0.42	0.22	0.6233	0.4633	0.3433	3.54	0.48	PREDICTED: LOW QUALITY PROTEIN: kinesin-like protein KIN-14P [Lupinus angustifolius]	COG5059(Kinesin family member)	sp|Q5JKW1|KN14C_ORYSJ(Kinesin-like protein KIN-14C OS=Oryza sativa subsp. japonica OX=39947 GN=KIN14C PE=2 SV=1)	PF00225(Kinesin:Kinesin motor domain); PF16796(Microtub_bd:Microtubule binding); PF00307(CH:Calponin homology (CH) domain)
TRINITY_DN12988_c0_g2		3.8433	3.61	3.61	1.66	0	12.5767	11.0133	6.6133
TRINITY_DN12990_c0_g1		1.1933	1.56	7.59	1.2233	1.1433	0.5667	8.4733	9.1367	PREDICTED: chitotriosidase-1-like [Lupinus angustifolius] >XP_019463751.1 PREDICTED: chitotriosidase-1-like [Lupinus angustifolius]	COG3325(chitinase)	sp|O81862|CHIC_ARATH(Class V chitinase OS=Arabidopsis thaliana OX=3702 GN=ChiC PE=1 SV=1)	PF00704(Glyco_hydro_18:Glycosyl hydrolases family 18)
TRINITY_DN12992_c0_g1		2.3833	0.9667	0.0767	0.34	1.13	0.4867	1.8067	0.2333	PREDICTED: serine/threonine-protein phosphatase PP1-like [Lupinus angustifolius]	ENOG4111SVF(serine threonine-protein phosphatase); ENOG410YDR9(serine threonine-protein phosphatase); ENOG410XPVF(serine threonine-protein phosphatase)	sp|P48489|PP1_ORYSJ(Serine/threonine-protein phosphatase PP1 OS=Oryza sativa subsp. japonica OX=39947 GN=Os03g0268000 PE=2 SV=2)	PF00149(Metallophos:Calcineurin-like phosphoesterase)
TRINITY_DN12992_c0_g2		8.1633	2.68	0.53	3.2333	4.5633	2.7967	8.1133	1.2367	PREDICTED: serine/threonine-protein phosphatase PP1-like [Lupinus angustifolius] >OIW00937.1 hypothetical protein TanjilG_10015 [Lupinus angustifolius]	ENOG4111SVF(serine threonine-protein phosphatase); ENOG410YDR9(serine threonine-protein phosphatase)	sp|P48480|PP11_ACEPE(Serine/threonine-protein phosphatase PP1 isozyme 1 OS=Acetabularia peniculus OX=35862 PE=3 SV=1)	PF00149(Metallophos:Calcineurin-like phosphoesterase); PF16891(STPPase_N:Serine-threonine protein phosphatase N-terminal domain)
TRINITY_DN12994_c0_g2		1.4467	0.2833	0.0767	0.4233	0.6967	0.1167	1.83	0.1433	hypothetical protein TanjilG_04576 [Lupinus angustifolius]	ENOG410XNY0(Mitogen-activated protein kinase)	sp|Q9LV37|MPK9_ARATH(Mitogen-activated protein kinase 9 OS=Arabidopsis thaliana OX=3702 GN=MPK9 PE=2 SV=2)
TRINITY_DN12997_c0_g1		0.6533	0.4467	0.6567	2.48	1.0633	0.2533	1.6967	1.1733
TRINITY_DN13000_c0_g1		660.13	245.7	34.4733	224.113	329.913	168.147	472.243	91.9333	PREDICTED: putative invertase inhibitor [Lupinus angustifolius] >OIW00198.1 hypothetical protein TanjilG_29188 [Lupinus angustifolius]	ENOG410Z9HA(Invertase pectin methylesterase inhibitor family protein)	sp|Q8GT41|PLA1_PLAAC(Putative invertase inhibitor OS=Platanus acerifolia OX=140101 PE=1 SV=1)	PF04043(PMEI:Plant invertase/pectin methylesterase inhibitor)
TRINITY_DN13028_c0_g1		2.0333	0.47	0.2367	0.8667	0.19	0.1167	0.56	5.8133	PREDICTED: vegetative cell wall protein gp1-like [Lupinus angustifolius] >OIW01562.1 hypothetical protein TanjilG_09386 [Lupinus angustifolius]
TRINITY_DN1302_c1_g1		7.4867	27.7067	10.34	11.0667	41.63	30.2767	4.5867	45.0633	hypothetical protein TanjilG_30333 [Lupinus angustifolius]	COG1064(alcohol dehydrogenase)	sp|P31656|CADH_MEDSA(Probable cinnamyl alcohol dehydrogenase OS=Medicago sativa OX=3879 GN=CAD2 PE=1 SV=1)	PF08240(ADH_N:Alcohol dehydrogenase GroES-like domain)
TRINITY_DN13035_c0_g1		1.2	1.5533	9.81	1.13	0.9733	2.8333	2.2233	4.0733	PREDICTED: urea-proton symporter DUR3 [Lupinus angustifolius]	COG0591(symporter)	sp|F4KD71|DUR3_ARATH(Urea-proton symporter DUR3 OS=Arabidopsis thaliana OX=3702 GN=DUR3 PE=1 SV=1)	PF00474(SSF:Sodium:solute symporter family)
TRINITY_DN13038_c0_g1		1.49	3.0433	3.5033	4.9067	1.94	2.9	5.4567	3.84	PREDICTED: LEAF RUST 10 DISEASE-RESISTANCE LOCUS RECEPTOR-LIKE PROTEIN KINASE-like 1.1 isoform X1 [Lupinus angustifolius]	COG0515(Serine Threonine protein kinase)	sp|Q9C6K9|LRL11_ARATH(LEAF RUST 10 DISEASE-RESISTANCE LOCUS RECEPTOR-LIKE PROTEIN KINASE-like 1.1 OS=Arabidopsis thaliana OX=3702 GN=LRK10L-1.1 PE=2 SV=1)	PF00069(Pkinase:Protein kinase domain); PF07714(Pkinase_Tyr:Protein tyrosine kinase)
TRINITY_DN13040_c0_g1		0.5133	2.0867	3.07	2.4	1.4333	2.0667	1.5367	1.7933	PREDICTED: protein ABHD17B-like isoform X1 [Lupinus angustifolius] >OIW19504.1 hypothetical protein TanjilG_06959 [Lupinus angustifolius]	COG1073(Hydrolase)	sp|Q6DD70|AB17C_XENLA(Alpha/beta hydrolase domain-containing protein 17C OS=Xenopus laevis OX=8355 GN=abhd17c PE=2 SV=1)	PF12146(Hydrolase_4:Serine aminopeptidase, S33); PF00561(Abhydrolase_1:alpha/beta hydrolase fold); PF00326(Peptidase_S9:Prolyl oligopeptidase family); PF08840(BAAT_C:BAAT / Acyl-CoA thioester hydrolase C terminal); PF02230(Abhydrolase_2:Phospholipase/Carboxylesterase)
TRINITY_DN13047_c0_g1		96.3333	38.0133	17.0733	48.2333	60.7933	27.2067	82.12	39.1	PREDICTED: monogalactosyldiacylglycerol synthase 2, chloroplastic-like [Lupinus angustifolius] >XP_019440836.1 PREDICTED: monogalactosyldiacylglycerol synthase 2, chloroplastic-like [Lupinus angustifolius] >OIW19526.1 hypothetical protein TanjilG_06981 [Lupinus angustifolius]	COG0707(Cell wall formation. Catalyzes the transfer of a GlcNAc subunit on undecaprenyl-pyrophosphoryl-MurNAc-pentapeptide (lipid intermediate I) to form undecaprenyl-pyrophosphoryl-MurNAc- (pentapeptide)GlcNAc (lipid intermediate II) (By similarity))	sp|O82730|MGDG2_ARATH(Monogalactosyldiacylglycerol synthase 2, chloroplastic OS=Arabidopsis thaliana OX=3702 GN=MGD2 PE=1 SV=1)	PF06925(MGDG_synth:Monogalactosyldiacylglycerol (MGDG) synthase); PF04101(Glyco_tran_28_C:Glycosyltransferase family 28 C-terminal domain)
TRINITY_DN13048_c0_g1		16.01	7.69	42.5333	8.24	0.1767	16.1833	40.48	14.7033	PREDICTED: non-cyanogenic beta-glucosidase-like [Lupinus angustifolius] >OIW05717.1 hypothetical protein TanjilG_23503 [Lupinus angustifolius]	COG2723(beta-glucosidase)	sp|Q7XKV4|BGL12_ORYSJ(Beta-glucosidase 12 OS=Oryza sativa subsp. japonica OX=39947 GN=BGLU12 PE=1 SV=2)	PF00232(Glyco_hydro_1:Glycosyl hydrolase family 1)
TRINITY_DN13049_c0_g1		2.76	5.23	4.67	4.5667	3.0733	0.46	4.69	3.28	cytochrome c biogenesis Fc (mitochondrion	ENOG410Y8ZK(auxin response factor)	sp|Q8L7G0|ARFA_ARATH(Auxin response factor 1 OS=Arabidopsis thaliana OX=3702 GN=ARF1 PE=1 SV=2)
TRINITY_DN13051_c0_g1		6.6	1.0233	0.1367	1.0133	1.2567	0.6367	6.6867	0.9467	PREDICTED: glucan endo-1,3-beta-glucosidase 5-like [Lupinus angustifolius] >OIV97327.1 hypothetical protein TanjilG_07079 [Lupinus angustifolius]	ENOG410YC1G(glucan endo-1-3-beta-glucosidase)	sp|Q9M088|E135_ARATH(Glucan endo-1,3-beta-glucosidase 5 OS=Arabidopsis thaliana OX=3702 GN=At4g31140 PE=2 SV=1)	PF00332(Glyco_hydro_17:Glycosyl hydrolases family 17); PF07983(X8:X8 domain)
TRINITY_DN13068_c0_g2		0.0333	0.29	2.2	0.5867	0.32	0.7467	0.2567	0.4267	PREDICTED: amino acid permease 3-like [Lupinus angustifolius] >OIW17811.1 hypothetical protein TanjilG_02439 [Lupinus angustifolius]	COG0814(amino acid transport)	sp|Q38967|AAP2_ARATH(Amino acid permease 2 OS=Arabidopsis thaliana OX=3702 GN=AAP2 PE=1 SV=1)	PF01490(Aa_trans:Transmembrane amino acid transporter protein); PF03222(Trp_Tyr_perm:Tryptophan/tyrosine permease family)
TRINITY_DN13075_c0_g1		2.3267	3.5133	3.1433	5.1033	1.0433	2.59	2.67	2.7833	PREDICTED: palmitoyl-protein thioesterase 1-like [Lupinus angustifolius] >OIV92785.1 hypothetical protein TanjilG_00919 [Lupinus angustifolius]	COG1075(Endonuclease/Exonuclease/phosphatase family)	sp|Q20390|PPT1_CAEEL(Palmitoyl-protein thioesterase 1 OS=Caenorhabditis elegans OX=6239 GN=ppt-1 PE=2 SV=2)	PF02089(Palm_thioest:Palmitoyl protein thioesterase)
TRINITY_DN13077_c0_g1		0	0.69	2.7667	1.06	0.3433	0.4333	1.1767	0.7933	PREDICTED: geranylgeranyl diphosphate reductase, chloroplastic-like [Lupinus angustifolius] >OIW19630.1 hypothetical protein TanjilG_18440 [Lupinus angustifolius]	COG0644(geranylgeranyl reductase)	sp|Q9ZS34|CHLP_TOBAC(Geranylgeranyl diphosphate reductase, chloroplastic OS=Nicotiana tabacum OX=4097 GN=CHLP PE=2 SV=1)
TRINITY_DN13078_c0_g1		7.8433	11.6467	15.9033	16.1133	0	0	1.5667	5.3333	PREDICTED: uncharacterized protein LOC109339098 [Lupinus angustifolius]	ENOG410ZU02(NC domain-containing protein)		PF04970(LRAT:Lecithin retinol acyltransferase)
TRINITY_DN1307_c0_g2		4.4667	1.0433	0.3467	0.0067	1.7867	2.66	3.07	1.1367	hypothetical chloroplast RF21 (chloroplast		sp|A9LYE4|YCF2_ACOAM(Protein Ycf2 OS=Acorus americanus OX=263995 GN=ycf2-A PE=3 SV=1)	PF05695(DUF825:Plant protein of unknown function (DUF825))
TRINITY_DN13086_c0_g1		4.6067	1.3167	1.0767	1.6033	2.9133	2.4567	4.0267	2.0433	PREDICTED: probable serine/threonine-protein kinase At1g09600 [Lupinus angustifolius] >OIV92631.1 hypothetical protein TanjilG_17982 [Lupinus angustifolius]	ENOG410XPIR(Cyclin-Dependent Kinase)	sp|F4I114|Y1960_ARATH(Probable serine/threonine-protein kinase At1g09600 OS=Arabidopsis thaliana OX=3702 GN=At1g09600 PE=3 SV=1)	PF00069(Pkinase:Protein kinase domain); PF07714(Pkinase_Tyr:Protein tyrosine kinase)
TRINITY_DN13089_c0_g1		4.95	4.4433	1.86	4.7567	10.9	3.2167	1.0967	3.4867
TRINITY_DN13092_c0_g1		2.6167	3.2733	0.4333	4.6767	5.3767	0	3.99	1.2767	hypothetical protein TanjilG_06055 [Lupinus angustifolius]	COG0349(Exonuclease involved in the 3' processing of various precursor tRNAs. Initiates hydrolysis at the 3'-terminus of an RNA molecule and releases 5'-mononucleotides (By similarity))
TRINITY_DN13098_c0_g1		42.28	18.0967	11.3733	25.94	25.3667	17.4367	29.9167	22.81	PREDICTED: auxin-induced protein X10A-like [Lupinus angustifolius] >OIV93700.1 hypothetical protein TanjilG_16551 [Lupinus angustifolius]	ENOG410YVUY(auxin-induced protein); ENOG410Z28U(auxin-induced protein)	sp|P33080|AX10A_SOYBN(Auxin-induced protein X10A OS=Glycine max OX=3847 PE=2 SV=1)	PF02519(Auxin_inducible:Auxin responsive protein)
TRINITY_DN13112_c0_g1		0.2267	0.7267	2.33	0.7067	0.2733	0.8267	0.5033	1.02	PREDICTED: uncharacterized protein LOC109353989 [Lupinus angustifolius]	ENOG410YQ1A(-)
TRINITY_DN13118_c0_g1		1.0967	14.0267	7.7367	3.82	16.0567	16.2133	3.9133	2.99	receptor-like protein EIX2 [Glycine soja] >RZB61463.1 Receptor-like protein EIX2 [Glycine soja]	COG4886(leucine Rich Repeat)	sp|Q6JN47|EIX1_SOLLC(Receptor-like protein EIX1 OS=Solanum lycopersicum OX=4081 GN=EIX1 PE=2 SV=2)	PF13855(LRR_8:Leucine rich repeat); PF08263(LRRNT_2:Leucine rich repeat N-terminal domain); PF12799(LRR_4:Leucine Rich repeats (2 copies))
TRINITY_DN13125_c0_g1		1.2267	2.6867	11.9167	3.93	2.76	7.1967	1.82	3.6433	PREDICTED: UV-B-induced protein At3g17800, chloroplastic-like isoform X3 [Lupinus angustifolius] >OIW01048.1 hypothetical protein TanjilG_14231 [Lupinus angustifolius]	ENOG410YC8B(Protein of unknown function (DUF760))	sp|Q9LVJ0|UVB31_ARATH(UV-B-induced protein At3g17800, chloroplastic OS=Arabidopsis thaliana OX=3702 GN=At3g17800 PE=2 SV=1)	PF05542(DUF760:Protein of unknown function (DUF760))
TRINITY_DN13129_c0_g1		1.88	1.0033	2.0467	4.38	0.45	12.2367	4.0567	1.02	PREDICTED: uncharacterized protein LOC109352871 [Lupinus angustifolius]		sp|Q9UR07|TF211_SCHPO(Transposon Tf2-11 polyprotein OS=Schizosaccharomyces pombe (strain 972 / ATCC 24843) OX=284812 GN=Tf2-11 PE=3 SV=1)	PF00665(rve:Integrase core domain)
TRINITY_DN1313_c1_g1		95.1467	63.17	22.0833	38.83	35.8967	54.6433	49.54	57.85	PREDICTED: ferredoxin, root R-B1-like [Lupinus angustifolius] >OIV99275.1 hypothetical protein TanjilG_17085 [Lupinus angustifolius]	COG0633(Ferredoxin)	sp|P27788|FER3_MAIZE(Ferredoxin-3, chloroplastic OS=Zea mays OX=4577 GN=FDX3 PE=1 SV=1)	PF00111(Fer2:2Fe-2S iron-sulfur cluster binding domain)
TRINITY_DN13145_c0_g1		0.0433	0.42	0.3833	0.2033	0.21	0.3467	2.22	6.1533	hypothetical protein TanjilG_14036 [Lupinus angustifolius]	COG2124(Cytochrome p450)	sp|O81971|C71D9_SOYBN(Cytochrome P450 71D9 OS=Glycine max OX=3847 GN=CYP71D9 PE=2 SV=1)
TRINITY_DN13161_c0_g1		52.2533	16.3167	3.4867	20.1167	28.5133	15.73	35.46	10.33	PREDICTED: uncharacterized protein LOC109337851 [Lupinus angustifolius] >OIW20146.1 hypothetical protein TanjilG_02126 [Lupinus angustifolius]	ENOG410ZPM3(protease inhibitor seed storage lipid transfer protein (LTP) family protein)		PF14368(LTP_2:Probable lipid transfer); PF00234(Tryp_alpha_amyl:Protease inhibitor/seed storage/LTP family)
TRINITY_DN13168_c0_g1		7.9233	5.6333	2.2033	5.1467	5.3267	6.13	16.0067	6.6433	PREDICTED: 1-aminocyclopropane-1-carboxylate synthase [Lupinus angustifolius] >OIW19838.1 hypothetical protein TanjilG_24551 [Lupinus angustifolius]	COG0436(-)	sp|P31531|1A1C_SOYBN(1-aminocyclopropane-1-carboxylate synthase OS=Glycine max OX=3847 GN=ACS1 PE=2 SV=1)	PF00155(Aminotran_1_2:Aminotransferase class I and II)
TRINITY_DN1316_c0_g1		6.9933	22.5267	43.3367	26.5767	11.4367	34.1533	13.6567	28.9767	hypothetical protein TanjilG_19096 [Lupinus angustifolius]	ENOG410ZFBK(Protease inhibitor seed storage lipid transfer protein)	sp|Q8W453|DIRL1_ARATH(Putative lipid-transfer protein DIR1 OS=Arabidopsis thaliana OX=3702 GN=DIR1 PE=1 SV=1)	PF14368(LTP_2:Probable lipid transfer); PF00234(Tryp_alpha_amyl:Protease inhibitor/seed storage/LTP family)
TRINITY_DN13170_c0_g1		0.8333	3.3367	0.1933	0.6667	0.51	0	0.6067	0.7833	hypothetical protein TanjilG_32519 [Lupinus angustifolius]	ENOG4111IF3(TRAF-type zinc finger domain containing 1)		PF02176(zf-TRAF:TRAF-type zinc finger)
TRINITY_DN13173_c0_g2		2.2667	1.5767	3.7133	0.4933	0.7833	0	4.6	5.0567
TRINITY_DN1318_c0_g1		5.66	192.393	143.877	38.2567	7.9167	6.16	20.8333	89.8433	PREDICTED: MLP-like protein 31 [Lupinus angustifolius] >OIV89148.1 hypothetical protein TanjilG_26043 [Lupinus angustifolius]		sp|Q9SSK5|MLP43_ARATH(MLP-like protein 43 OS=Arabidopsis thaliana OX=3702 GN=MLP43 PE=1 SV=1)	PF00407(Bet_v_1:Pathogenesis-related protein Bet v I family)
TRINITY_DN13190_c0_g1		5.61	7.83	14.4067	10.36	2.98	3.49	5.4733	10.0867	PREDICTED: gamma-glutamyl peptidase 5-like [Lupinus angustifolius] >OIV91585.1 hypothetical protein TanjilG_08997 [Lupinus angustifolius]	COG0518(Catalyzes the synthesis of GMP from XMP (By similarity))	sp|O82225|GGP5_ARATH(Gamma-glutamyl peptidase 5 OS=Arabidopsis thaliana OX=3702 GN=GGP5 PE=2 SV=1)	PF00117(GATase:Glutamine amidotransferase class-I); PF07722(Peptidase_C26:Peptidase C26)
TRINITY_DN13193_c0_g1		13.73	2.8833	0.42	3.92	5.0833	2.2233	11.8167	1.61	PREDICTED: uncharacterized protein LOC109334691 [Lupinus angustifolius] >XP_019426130.1 PREDICTED: uncharacterized protein LOC109334691 [Lupinus angustifolius] >OIV91989.1 hypothetical protein TanjilG_07728 [Lupinus angustifolius]	ENOG4111CT3(-); ENOG410Z0BX(-)
TRINITY_DN13195_c0_g3		2.42	2.8167	4.8733	2.2367	1.17	0	1.6133	2.3867	hypothetical protein TanjilG_20972 [Lupinus angustifolius]
TRINITY_DN131_c0_g2		0.12	0.0833	1.6333	0.0767	0.31	1.3267	0.2867	0.1267
TRINITY_DN13200_c0_g1		1.29	2.6133	7.1467	5.7333	1.2167	6.4633	3.72	3.85	PREDICTED: uncharacterized protein LOC109327022 [Lupinus angustifolius] >OIV97597.1 hypothetical protein TanjilG_12354 [Lupinus angustifolius]	ENOG410YF1M(Pfam:DUF248)	sp|Q9LN50|PMTS_ARATH(Probable methyltransferase PMT28 OS=Arabidopsis thaliana OX=3702 GN=At1g19430 PE=2 SV=1)	PF03141(Methyltransf_29:Putative S-adenosyl-L-methionine-dependent methyltransferase); PF08241(Methyltransf_11:Methyltransferase domain); PF13649(Methyltransf_25:Methyltransferase domain)
TRINITY_DN13204_c0_g1		0	3.3467	6.6633	0	0	4.5167	9.5467	12.47	hypothetical protein TanjilG_19486 [Lupinus angustifolius]	ENOG41128JA(-)
TRINITY_DN1320_c0_g1		65.9267	22.82	3.2533	25.8867	31.95	17.8633	48.7767	12.2967	PREDICTED: probable myosin-binding protein 5 isoform X1 [Lupinus angustifolius] >OIV97080.1 hypothetical protein TanjilG_25670 [Lupinus angustifolius]	ENOG410ZKWF(Pfam:DUF593)	sp|Q9LMC8|MYOB5_ARATH(Probable myosin-binding protein 5 OS=Arabidopsis thaliana OX=3702 GN=MYOB5 PE=2 SV=1)	PF04576(Zein-binding:Zein-binding)
TRINITY_DN1320_c0_g2		50.98	17.5967	2.7433	17.4333	27.1133	13.4267	37.1067	10.0367	PREDICTED: probable myosin-binding protein 5 [Lupinus angustifolius] >OIW17156.1 hypothetical protein TanjilG_00199 [Lupinus angustifolius]	ENOG410ZKWF(Pfam:DUF593)	sp|Q9LMC8|MYOB5_ARATH(Probable myosin-binding protein 5 OS=Arabidopsis thaliana OX=3702 GN=MYOB5 PE=2 SV=1)	PF04576(Zein-binding:Zein-binding)
TRINITY_DN13215_c0_g1		1.6167	0.4933	0.2567	2.83	0.63	2.9333	10.76	1.9367
TRINITY_DN13218_c1_g1		0.4267	0.6967	0.0633	0.36	2.6367	2.1967	0.0433	0.73	PREDICTED: probable pyridoxal 5'-phosphate synthase subunit PDX1 [Lupinus angustifolius] >OIW20189.1 hypothetical protein TanjilG_06590 [Lupinus angustifolius]	COG0214(-)	sp|Q39963|PDX1_HEVBR(Probable pyridoxal 5'-phosphate synthase subunit PDX1 OS=Hevea brasiliensis OX=3981 GN=PDX1 PE=2 SV=1)
TRINITY_DN13227_c0_g1		33.5267	5.1633	0.7133	3.7133	5.5667	5.2267	24.6767	1.0267	hypothetical protein TanjilG_29451 [Lupinus angustifolius]	ENOG410Y4M9(-)
TRINITY_DN13229_c0_g1		7.4667	3.63	13.1733	4.8367	1.54	0	3.6233	0	PREDICTED: probable catabolite repression protein creC [Lupinus angustifolius] >XP_019456084.1 PREDICTED: probable catabolite repression protein creC [Lupinus angustifolius] >OIW05160.1 hypothetical protein TanjilG_02633 [Lupinus angustifolius]	COG2319(wd repeat)
TRINITY_DN13232_c0_g1		20.07	10.3767	3.73	8.48	14.74	6.8567	18.9567	8.1867	PREDICTED: formin-like protein 3 [Lupinus angustifolius] >XP_019448964.1 PREDICTED: formin-like protein 3 [Lupinus angustifolius] >OIW08410.1 hypothetical protein TanjilG_03086 [Lupinus angustifolius]	ENOG410XQR0(inverted formin, FH2 and WH2 domain containing)	sp|Q94B77|FH5_ARATH(Formin-like protein 5 OS=Arabidopsis thaliana OX=3702 GN=FH5 PE=2 SV=2)	PF02181(FH2:Formin Homology 2 Domain)
TRINITY_DN13253_c0_g1		0	0	0.1867	16.4767	27.09	27.6233	8.8333	4.4933
TRINITY_DN13277_c0_g2		0	0	5.9733	0.05	0.15	0	0	11.13	hypothetical protein TanjilG_12262 [Lupinus angustifolius]	ENOG410XSP5(Major Facilitator superfamily)
TRINITY_DN13287_c2_g1		0.25	0.3533	0.1133	0	0.19	1.1033	0.5667	0.4933
TRINITY_DN13288_c0_g1		1.8033	13.36	19.08	11.8133	4.2767	20.1167	12.64	8.7933	PREDICTED: probable protein ABIL5 [Lupinus angustifolius] >OIW15981.1 hypothetical protein TanjilG_04516 [Lupinus angustifolius]	ENOG410YW15(-); ENOG410YZ7R(-)	sp|Q5JMF2|ABIL5_ORYSJ(Probable protein ABIL5 OS=Oryza sativa subsp. japonica OX=39947 GN=Os01g0760900 PE=2 SV=1)
TRINITY_DN13298_c0_g2		0.8667	0.8233	0.32	0.3033	1.5633	0.1233	1.2967	0.7167	PREDICTED: dentin sialophosphoprotein-like [Lupinus angustifolius] >OIW18615.1 hypothetical protein TanjilG_13367 [Lupinus angustifolius]	ENOG410XP4Y(be involved in pre-mRNA splicing (By similarity))
TRINITY_DN1329_c0_g3		0.49	1.4433	2.6733	0.0367	1.0433	2.3833	0.5033	2.7367	Transposon TX1 149 kDa protein [Glycine soja]	ENOG410YADE(Reverse transcriptase (RNA-dependent DNA polymerase)); ENOG4111K5V(Reverse transcriptase (RNA-dependent DNA polymerase))	sp|P14381|YTX2_XENLA(Transposon TX1 uncharacterized 149 kDa protein OS=Xenopus laevis OX=8355 PE=4 SV=1)	PF00078(RVT_1:Reverse transcriptase (RNA-dependent DNA polymerase))
TRINITY_DN1329_c0_g4		0.2667	0.6533	0.9667	0.0267	0.49	0.93	0.33	1.6533	PREDICTED: uncharacterized protein LOC109350506 [Lupinus angustifolius]	COG1185(Transcription factor)	sp|Q8GZQ3|PNP1_ARATH(Polyribonucleotide nucleotidyltransferase 1, chloroplastic OS=Arabidopsis thaliana OX=3702 GN=PNP1 PE=1 SV=1)	PF08284(RVP_2:Retroviral aspartyl protease); PF13650(Asp_protease_2:Aspartyl protease)
TRINITY_DN132_c0_g1		29.01	11.71	3.2	11.38	16.13	9.43	22.3233	7.4867	hypothetical protein TanjilG_06300 [Lupinus angustifolius]	ENOG410YCRQ(Formin-like protein); ENOG410XQR0(inverted formin, FH2 and WH2 domain containing)	sp|Q94B77|FH5_ARATH(Formin-like protein 5 OS=Arabidopsis thaliana OX=3702 GN=FH5 PE=2 SV=2)	PF02181(FH2:Formin Homology 2 Domain); PF13908(Shisa:Wnt and FGF inhibitory regulator)
TRINITY_DN13315_c0_g1		1.8433	1.69	3.1433	1.17	0.6233	0.75	5.97	1.29	PREDICTED: protein SODIUM POTASSIUM ROOT DEFECTIVE 3-like [Lupinus angustifolius] >XP_019446309.1 PREDICTED: protein SODIUM POTASSIUM ROOT DEFECTIVE 3-like [Lupinus angustifolius]	COG2608(Rna-binding protein)	sp|Q58FZ0|NAKR2_ARATH(Protein SODIUM POTASSIUM ROOT DEFECTIVE 2 OS=Arabidopsis thaliana OX=3702 GN=NAKR2 PE=2 SV=1)	PF00403(HMA:Heavy-metal-associated domain)
TRINITY_DN13330_c0_g1		23.6867	31.17	49.71	36.8167	25.7133	96.85	32.1	22.3467	PREDICTED: uncharacterized protein LOC109326770 [Lupinus angustifolius]	ENOG411234X(-); COG0724(Rna-binding protein)
TRINITY_DN13330_c0_g2		1.8633	1.4	11.5633	3.1667	1.8267	14.0133	4.1833	3.0433
TRINITY_DN13334_c0_g1		0.3467	8.47	14.1733	8.93	2.3533	9.6	2.45	4.8933	PREDICTED: gibberellin-regulated protein 4 [Populus euphratica]	ENOG410YQ6U(Gibberellin-regulated protein)	sp|Q6NMQ7|GASA6_ARATH(Gibberellin-regulated protein 6 OS=Arabidopsis thaliana OX=3702 GN=GASA6 PE=3 SV=1)	PF02704(GASA:Gibberellin regulated protein)
TRINITY_DN13342_c0_g1		807.827	125.797	13.0867	100.683	209.807	95.0867	772.49	86.6467	hypothetical protein TanjilG_17925 [Lupinus angustifolius]
TRINITY_DN13348_c0_g1		53.2767	22.6867	8.9833	14.1933	17.36	10.2867	2.0067	11.1533	hypothetical protein TanjilG_16993 [Lupinus angustifolius]	COG1132((ABC) transporter)	sp|Q9FWX7|AB11B_ARATH(ABC transporter B family member 11 OS=Arabidopsis thaliana OX=3702 GN=ABCB11 PE=2 SV=1)	PF00005(ABC_tran:ABC transporter); PF00664(ABC_membrane:ABC transporter transmembrane region); PF02463(SMC_N:RecF/RecN/SMC N terminal domain); PF13401(AAA_22:AAA domain); PF13191(AAA_16:AAA ATPase domain); PF00270(DEAD:DEAD/DEAH box helicase); PF13555(AAA_29:P-loop containing region of AAA domain); PF13175(AAA_15:AAA ATPase domain)
TRINITY_DN13355_c0_g1		4.5667	1.9533	1.4033	1.4567	0.98	1.5967	5.58	1.7733	PREDICTED: transcription factor PAR1-like [Lupinus angustifolius] >OIW04213.1 hypothetical protein TanjilG_00773 [Lupinus angustifolius]	ENOG410ZFRH(phy rapidly regulated)	sp|Q9LXR7|PAR2_ARATH(Transcription factor PAR2 OS=Arabidopsis thaliana OX=3702 GN=PAR2 PE=3 SV=1)
TRINITY_DN13365_c0_g1		4.25	0.9933	0.56	0.7333	1.37	0.72	5.0267	0.9	PREDICTED: uncharacterized protein LOC109337541 [Lupinus angustifolius] >XP_019430081.1 PREDICTED: uncharacterized protein LOC109337541 [Lupinus angustifolius] >OIW19925.1 hypothetical protein TanjilG_30839 [Lupinus angustifolius]	ENOG41115V6(Suppressor of g2 allele of skp1)	sp|Q5BIM2|F214B_BOVIN(Protein FAM214B OS=Bos taurus OX=9913 GN=FAM214B PE=2 SV=1)	PF13889(Chromosome_seg:Chromosome segregation during meiosis); PF13915(DUF4210:Domain of unknown function (DUF4210))
TRINITY_DN13368_c0_g3		0.8733	1.0867	3.17	0.06	0.6633	1.1	0.07	0.7033	Auxin response factor 8, partial [Mucuna pruriens]	ENOG410YA3R(auxin response factor)	sp|Q9FGV1|ARFH_ARATH(Auxin response factor 8 OS=Arabidopsis thaliana OX=3702 GN=ARF8 PE=1 SV=2)
TRINITY_DN1337_c0_g1		2.05	5.3	2.8733	4.2133	16.8033	8.72	3.9933	10.6433
TRINITY_DN1337_c0_g2		0.3667	0.4667	0.45	0.0867	3.2	4.87	0.06	1.2833
TRINITY_DN1337_c0_g3		23.9	6.8833	2.5567	5.0233	1.5667	0.5333	0.7733	1.29
TRINITY_DN13380_c0_g1		1.05	3.91	0.0333	0	0	0	7.3167	0.3567	chalcone synthase, partial [Stenopetalum velutinum]	COG3424(Zinc finger protein)	sp|P13416|CHS1_SINAL(Chalcone synthase 1 OS=Sinapis alba OX=3728 GN=CHS1 PE=2 SV=1)	PF00195(Chal_sti_synt_N:Chalcone and stilbene synthases, N-terminal domain)
TRINITY_DN13380_c0_g2		3.8	0	0	0	0.49	0.2667	0	0
TRINITY_DN13383_c0_g2		0.55	0.3933	4.3367	0.4633	0.6567	1.2833	0.87	3.1733	PREDICTED: NAC domain-containing protein 100-like isoform X1 [Lupinus angustifolius] >OIW03329.1 hypothetical protein TanjilG_03438 [Lupinus angustifolius]	ENOG410YDQ3(No apical meristem (NAM) protein)	sp|Q9FLJ2|NC100_ARATH(NAC domain-containing protein 100 OS=Arabidopsis thaliana OX=3702 GN=NAC100 PE=2 SV=1)	PF02365(NAM:No apical meristem (NAM) protein)
TRINITY_DN13384_c0_g2		0.9667	2.6133	0.58	0.54	0.8767	1.2667	0.9733	0.87	PREDICTED: uncharacterized protein LOC109339517 [Lupinus angustifolius] >OIW21195.1 hypothetical protein TanjilG_30791 [Lupinus angustifolius]	ENOG41114KP(-)
TRINITY_DN13394_c0_g1		8.11	13.55	5.92	13.2433	13.14	9.9733	14.27	27.8633	PREDICTED: calmodulin-like protein 1 isoform X1 [Lupinus angustifolius] >OIV92881.1 hypothetical protein TanjilG_01015 [Lupinus angustifolius]	COG5126(-)	sp|Q9FYK2|CML25_ARATH(Probable calcium-binding protein CML25 OS=Arabidopsis thaliana OX=3702 GN=CML25 PE=2 SV=1)	PF00036(EF-hand_1:EF hand); PF13202(EF-hand_5:EF hand); PF13405(EF-hand_6:EF-hand domain); PF13499(EF-hand_7:EF-hand domain pair); PF13833(EF-hand_8:EF-hand domain pair); PF10591(SPARC_Ca_bdg:Secreted protein acidic and rich in cysteine Ca binding region); PF12763(EF-hand_4:Cytoskeletal-regulatory complex EF hand)
TRINITY_DN13398_c0_g2		1.2233	0.5333	1.0367	0.4433	0.8633	0.1167	1.1767	0.7033	PREDICTED: plasma membrane ATPase [Lupinus angustifolius]	COG0474(P-type atpase)	sp|Q42556|PMA9_ARATH(ATPase 9, plasma membrane-type OS=Arabidopsis thaliana OX=3702 GN=AHA9 PE=2 SV=2)	PF00122(E1-E2_ATPase:E1-E2 ATPase); PF00690(Cation_ATPase_N:Cation transporter/ATPase, N-terminus); PF13246(Cation_ATPase:Cation transport ATPase (P-type))
TRINITY_DN13399_c0_g1		16.7367	7.23	1.06	5.0133	8.1667	3.7867	16.1033	3.2067	PREDICTED: RHOMBOID-like protein 1 [Lupinus angustifolius] >OIW09185.1 hypothetical protein TanjilG_11323 [Lupinus angustifolius]	COG0705(rhomboid family)	sp|Q0WQX7|RBL1_ARATH(RHOMBOID-like protein 1 OS=Arabidopsis thaliana OX=3702 GN=RBL1 PE=2 SV=1)	PF01694(Rhomboid:Rhomboid family)
TRINITY_DN133_c0_g2		1.5	6.0967	5.7167	0.67	1.6667	0	4.4933	2.87	PREDICTED: clathrin heavy chain 1-like isoform X1 [Lupinus angustifolius] >OIV98409.1 hypothetical protein TanjilG_16736 [Lupinus angustifolius]	ENOG410XPH1(and Sec7 domain)	sp|Q0WLB5|CLAH2_ARATH(Clathrin heavy chain 2 OS=Arabidopsis thaliana OX=3702 GN=CHC2 PE=1 SV=1)
TRINITY_DN133_c1_g1		2.25	20.8567	17.8567	0.2033	16.3167	18.67	17.83	26.1767
TRINITY_DN13410_c0_g1		0	0.77	0.48	0.1833	0.45	0.0267	0.4867	0.7133
TRINITY_DN13419_c1_g1		0	0.0867	10.8833	3.4033	0.1933	1.11	0.2367	0.3033
TRINITY_DN13420_c0_g2		0.5367	0.79	0.54	0	0.4667	0.9967	1.95	0.2633
TRINITY_DN13421_c0_g1		2.0633	3.0533	0.0833	0.3467	1.5733	0.8967	0.39	0.41	PREDICTED: ethylene-responsive transcription factor ERF110-like [Lupinus angustifolius] >OIV98882.1 hypothetical protein TanjilG_20909 [Lupinus angustifolius]	ENOG411198J(AP2 ERF domain-containing transcription factor)	sp|Q70II3|EF110_ARATH(Ethylene-responsive transcription factor ERF110 OS=Arabidopsis thaliana OX=3702 GN=ERF110 PE=2 SV=2)	PF00847(AP2:AP2 domain)
TRINITY_DN13429_c0_g1		3.4767	1.8733	0.2333	1.9267	2.8167	1.18	2.6667	0.8167	PREDICTED: putative clathrin assembly protein At1g25240 [Lupinus angustifolius] >OIW04848.1 hypothetical protein TanjilG_29325 [Lupinus angustifolius]	ENOG410XQ90(AP2 ERF domain-containing transcription factor)	sp|Q9FRH3|CAP13_ARATH(Putative clathrin assembly protein At1g25240 OS=Arabidopsis thaliana OX=3702 GN=At1g25240 PE=3 SV=1)	PF07651(ANTH:ANTH domain)
TRINITY_DN1342_c0_g1		167.763	132.65	114.14	169.117	65.44	17.0433	155.19	123.04	PREDICTED: low-temperature-induced 65 kDa protein-like isoform X2 [Lupinus angustifolius]	ENOG410ZG4Y(low-temperature-induced 65); ENOG410Z9HT(-)
TRINITY_DN13431_c0_g2		1.7267	3.9633	8.81	4.9333	2.8	5.76	4.4	5.27	PREDICTED: uncharacterized protein LOC109331371 [Lupinus angustifolius] >XP_019421366.1 PREDICTED: uncharacterized protein LOC109331371 [Lupinus angustifolius] >XP_019421374.1 PREDICTED: uncharacterized protein LOC109331371 [Lupinus angustifolius] >OIW17402.1 hypothetical protein TanjilG_22514 [Lupinus angustifolius]
TRINITY_DN13432_c0_g2		0.3833	3.3567	5.0367	3.5167	0.6667	0	0.31	0.3967	hypothetical protein TanjilG_22657 [Lupinus angustifolius]	COG4886(leucine Rich Repeat)
TRINITY_DN13440_c0_g1		162.83	61.5533	9.9367	61.16	78.87	47.9333	156.627	27.2467
TRINITY_DN13443_c0_g1		0.2267	0.8767	1.86	0.8667	0.2767	0.6833	4.3833	3.2333	PREDICTED: protein ECERIFERUM 26-like [Lupinus angustifolius] >XP_019439948.1 PREDICTED: protein ECERIFERUM 26-like [Lupinus angustifolius] >OIW13821.1 hypothetical protein TanjilG_31710 [Lupinus angustifolius]	ENOG410YVYC(Transferase family)	sp|Q9LIS1|CR26L_ARATH(Protein ECERIFERUM 26-like OS=Arabidopsis thaliana OX=3702 GN=CER26L PE=2 SV=1)	PF02458(Transferase:Transferase family)
TRINITY_DN13450_c0_g1		0.8733	0.1367	0.0767	0.1133	0.18	0.15	0.3067	0.1367	PREDICTED: proline-rich receptor-like protein kinase PERK13 isoform X1 [Lupinus angustifolius] >XP_019420327.1 PREDICTED: proline-rich receptor-like protein kinase PERK13 isoform X2 [Lupinus angustifolius]	COG0515(Serine Threonine protein kinase)	sp|Q9SX31|PERK9_ARATH(Proline-rich receptor-like protein kinase PERK9 OS=Arabidopsis thaliana OX=3702 GN=PERK9 PE=1 SV=1)	PF00069(Pkinase:Protein kinase domain)
TRINITY_DN13450_c0_g2		12.4767	3.89	1.0667	4.36	6.85	2.6733	10.13	2.85	hypothetical protein TanjilG_16580 [Lupinus angustifolius]	COG0515(Serine Threonine protein kinase)	sp|Q9CAL8|PEK13_ARATH(Proline-rich receptor-like protein kinase PERK13 OS=Arabidopsis thaliana OX=3702 GN=PERK13 PE=1 SV=1)	PF07714(Pkinase_Tyr:Protein tyrosine kinase); PF00069(Pkinase:Protein kinase domain); PF17667(Pkinase_fungal:Fungal protein kinase)
TRINITY_DN13463_c0_g1		0.1467	0.05	13.9733	3.8	0.0767	0.0867	0.1333	0.7733	PREDICTED: 22.7 kDa class IV heat shock protein-like [Lupinus angustifolius] >OIV98952.1 hypothetical protein TanjilG_07387 [Lupinus angustifolius]	COG0071(Ras-related protein)	sp|P30236|HSP41_SOYBN(22.0 kDa class IV heat shock protein OS=Glycine max OX=3847 GN=HSP22.0 PE=3 SV=1)	PF00011(HSP20:Hsp20/alpha crystallin family); PF17886(ArsA_HSP20:HSP20-like domain found in ArsA); PF04969(CS:CS domain)
TRINITY_DN13474_c0_g1		1.64	11.9467	19.9267	10.5633	5.1633	14.5867	9.4533	10.2433	PREDICTED: golgin subfamily A member 6-like protein 6 [Lupinus angustifolius] >XP_019449990.1 PREDICTED: golgin subfamily A member 6-like protein 6 [Lupinus angustifolius] >OIW07676.1 hypothetical protein TanjilG_07718 [Lupinus angustifolius]	ENOG410YTP7(-)
TRINITY_DN13474_c0_g2		0.56	6.9167	7.2967	5.08	2.4633	5.1733	4.9633	6.9233	PREDICTED: golgin subfamily A member 6-like protein 6 [Lupinus angustifolius] >XP_019449990.1 PREDICTED: golgin subfamily A member 6-like protein 6 [Lupinus angustifolius] >OIW07676.1 hypothetical protein TanjilG_07718 [Lupinus angustifolius]	ENOG410YTP7(-)
TRINITY_DN13476_c0_g1		0.0533	0.8633	0.3433	0.6533	0.2533	0.2767	0	0	hypothetical protein TanjilG_28331 [Lupinus angustifolius]	ENOG410ZMY0(cytoplasmic linker associated protein)	sp|Q8RWY6|CLASP_ARATH(CLIP-associated protein OS=Arabidopsis thaliana OX=3702 GN=CLASP PE=1 SV=1)
TRINITY_DN13478_c0_g1		1.26	9.08	8.34	10.46	3.1833	9.89	9.6633	18.11	PREDICTED: UDP-glucose flavonoid 3-O-glucosyltransferase 7-like [Lupinus angustifolius] >OIW19334.1 hypothetical protein TanjilG_16848 [Lupinus angustifolius]	COG1819(Lipase (class 3))	sp|Q2V6J9|UFOG7_FRAAN(UDP-glucose flavonoid 3-O-glucosyltransferase 7 OS=Fragaria ananassa OX=3747 GN=GT7 PE=1 SV=1)	PF00201(UDPGT:UDP-glucoronosyl and UDP-glucosyl transferase)
TRINITY_DN13479_c0_g1		64.4433	60.0767	101.913	69.8767	47.5367	23.98	70.2133	71.7533
TRINITY_DN13482_c1_g1		19.69	27.3067	17.8967	48.1667	40.4833	21.6867	7.3433	17.83	hypothetical protein TanjilG_09174 [Lupinus angustifolius]
TRINITY_DN1348_c0_g1		2.4833	3.9667	11.4433	11.5	3.28	4.6933	4.19	6.6333	PREDICTED: uncharacterized protein LOC109334983 isoform X2 [Lupinus angustifolius]	ENOG4111IE1(mef2b neighbor)		PF10167(BORCS8:BLOC-1-related complex sub-unit 8)
TRINITY_DN13491_c0_g1		82.3667	26.3733	5.1933	29.5133	36.8567	21.46	52.51	13.91	hypothetical protein TanjilG_21696 [Lupinus angustifolius]	ENOG410ZNB7(hormone activity)	sp|Q9FZA0|RLF4_ARATH(Protein RALF-like 4 OS=Arabidopsis thaliana OX=3702 GN=RALFL4 PE=3 SV=1)	PF05498(RALF:Rapid ALkalinization Factor (RALF))
TRINITY_DN13496_c0_g1		0.66	1.5633	1.0367	1.0433	0.8033	2.2267	0.58	1.2833	hypothetical protein Ahy_B10g104479 isoform A [Arachis hypogaea]	ENOG410XPD0(Ras-related protein)	sp|O23657|RABC1_ARATH(Ras-related protein RABC1 OS=Arabidopsis thaliana OX=3702 GN=RABC1 PE=1 SV=1)	PF00071(Ras:Ras family)
TRINITY_DN13502_c0_g1		58.4267	29.09	6.74	23.8667	31.3533	19.7833	40.1133	16.1433	PREDICTED: uncharacterized protein At1g04910-like [Lupinus angustifolius] >OIW20943.1 hypothetical protein TanjilG_25938 [Lupinus angustifolius]	ENOG410YKDZ(DUF246 domain-containing protein)	sp|Q9SH89|OFT19_ARATH(O-fucosyltransferase 19 OS=Arabidopsis thaliana OX=3702 GN=OFUT19 PE=2 SV=1)	PF10250(O-FucT:GDP-fucose protein O-fucosyltransferase)
TRINITY_DN13511_c0_g1		0.31	2.92	3.46	2.9633	1.7733	2.4267	1.86	1.5367	PREDICTED: growth-regulating factor 3 [Lupinus angustifolius]	ENOG410Y9TR(growth-regulating factor)	sp|Q9SJR5|GRF3_ARATH(Growth-regulating factor 3 OS=Arabidopsis thaliana OX=3702 GN=GRF3 PE=1 SV=1)	PF08879(WRC:WRC); PF08880(QLQ:QLQ)
TRINITY_DN13513_c0_g1		56.33	7.8433	0.3233	7.1267	6.1567	1.9333	55.4067	4.1133	PREDICTED: late embryogenesis abundant protein 1-like [Lupinus angustifolius]	ENOG41119Z0(late embryogenesis abundant protein)
TRINITY_DN13513_c0_g2		93.93	12.6733	0.2933	8.3767	11.53	5.1033	123.533	10.4633	PREDICTED: late embryogenesis abundant protein 1-like [Lupinus angustifolius] >OIW21234.1 hypothetical protein TanjilG_31102 [Lupinus angustifolius]	ENOG41119Z0(late embryogenesis abundant protein)
TRINITY_DN13515_c0_g1		271.197	81.4067	14.95	107.913	160.367	83.2533	210.457	50.2767	PREDICTED: aquaporin NIP1-2-like [Lupinus angustifolius] >OIW20188.1 hypothetical protein TanjilG_06589 [Lupinus angustifolius]	COG0580(Channel that permits osmotically driven movement of water in both directions. It is involved in the osmoregulation and in the maintenance of cell turgor during volume expansion in rapidly growing cells. It mediates rapid entry or exit of water in response to abrupt changes in osmolarity (By similarity))	sp|Q8LFP7|NIP12_ARATH(Aquaporin NIP1-2 OS=Arabidopsis thaliana OX=3702 GN=NIP1-2 PE=2 SV=2)	PF00230(MIP:Major intrinsic protein)
TRINITY_DN13518_c0_g2		13.29	19.2333	12.65	0.26	9.6567	0.1233	24.3667	1.62
TRINITY_DN13537_c0_g1		0.9867	1.6167	1.3267	0.45	1.0567	0.3533	0.87	1.4967	hypothetical protein L195_g032490, partial [Trifolium pratense]	COG2801(Retrotransposon protein)	sp|P0CT41|TF212_SCHPO(Transposon Tf2-12 polyprotein OS=Schizosaccharomyces pombe (strain 972 / ATCC 24843) OX=284812 GN=Tf2-12 PE=3 SV=1)	PF17919(RT_RNaseH_2:RNase H-like domain found in reverse transcriptase); PF17917(RT_RNaseH:RNase H-like domain found in reverse transcriptase); PF17921(Integrase_H2C2:Integrase zinc binding domain); PF00665(rve:Integrase core domain); PF00385(Chromo:Chromo (CHRromatin Organisation MOdifier) domain)
TRINITY_DN13548_c0_g1		0.0333	2.8333	5.3833	1.8867	0.7733	1.8233	1.33	1.29	PREDICTED: B3 domain-containing transcription factor VRN1-like [Lupinus angustifolius] >OIW12728.1 hypothetical protein TanjilG_24661 [Lupinus angustifolius]	ENOG410ZPCJ(transcription, DNA-dependent)	sp|Q8L3W1|VRN1_ARATH(B3 domain-containing transcription factor VRN1 OS=Arabidopsis thaliana OX=3702 GN=VRN1 PE=1 SV=1)	PF02362(B3:B3 DNA binding domain)
TRINITY_DN13551_c0_g1		11.8567	49.6833	104.273	60.11	26.18	51.1533	44.01	50.7533	PREDICTED: uncharacterized protein LOC109355257 [Lupinus angustifolius] >OIW05878.1 hypothetical protein TanjilG_23664 [Lupinus angustifolius]	ENOG410ZEJB(Pollen proteins Ole e I like)		PF01190(Pollen_Ole_e_I:Pollen proteins Ole e I like)
TRINITY_DN13555_c0_g1		1.71	3.9033	18	6.45	7.5167	8.8567	2.3067	16.3067	PREDICTED: cytokinin dehydrogenase 3-like [Lupinus angustifolius] >OIV97401.1 hypothetical protein TanjilG_17585 [Lupinus angustifolius]	COG0277(FAD linked oxidase domain protein)	sp|Q9LTS3|CKX3_ARATH(Cytokinin dehydrogenase 3 OS=Arabidopsis thaliana OX=3702 GN=CKX3 PE=1 SV=1)	PF09265(Cytokin-bind:Cytokinin dehydrogenase 1, FAD and cytokinin binding); PF01565(FAD_binding_4:FAD binding domain)
TRINITY_DN13559_c1_g2		0	0.4867	0.79	0.4567	0.01	0.0133	0.0367	0.3967	PREDICTED: uncharacterized protein LOC109326339 [Lupinus angustifolius]		sp|Q94HW2|POLR1_ARATH(Retrovirus-related Pol polyprotein from transposon RE1 OS=Arabidopsis thaliana OX=3702 GN=RE1 PE=2 SV=1)	PF07727(RVT_2:Reverse transcriptase (RNA-dependent DNA polymerase))
TRINITY_DN1355_c0_g1		36.4367	9.2033	1.5233	9.0267	12.8233	6.5267	43.77	5.68	PREDICTED: actin-depolymerizing factor 12-like [Lupinus angustifolius]	ENOG41122P5(actin-depolymerizing factor)	sp|Q67ZM4|ADF7_ARATH(Actin-depolymerizing factor 7 OS=Arabidopsis thaliana OX=3702 GN=ADF7 PE=2 SV=1)	PF00241(Cofilin_ADF:Cofilin/tropomyosin-type actin-binding protein)
TRINITY_DN13565_c0_g1		188.673	101.193	154.463	57.26	110.663	141.04	217.02	264.677	hypothetical protein TanjilG_26613 [Lupinus angustifolius]	ENOG410XSH6(polyphenol oxidase)	sp|P43309|PPO_MALDO(Polyphenol oxidase, chloroplastic OS=Malus domestica OX=3750 PE=2 SV=1)	PF00264(Tyrosinase:Common central domain of tyrosinase)
TRINITY_DN13569_c0_g1		2.4867	1.19	0.07	0.3333	1.5067	1.4467	1.44	0.5133	hypothetical protein TanjilG_02104 [Lupinus angustifolius]	ENOG4111SVF(serine threonine-protein phosphatase); ENOG410YDR9(serine threonine-protein phosphatase)	sp|P48489|PP1_ORYSJ(Serine/threonine-protein phosphatase PP1 OS=Oryza sativa subsp. japonica OX=39947 GN=Os03g0268000 PE=2 SV=2)	PF00149(Metallophos:Calcineurin-like phosphoesterase); PF16891(STPPase_N:Serine-threonine protein phosphatase N-terminal domain)
TRINITY_DN13570_c1_g1		7.3733	16.4967	0	15.67	16.8467	0	0	11.2667	PREDICTED: UPF0161 protein At3g09310 isoform X1 [Lupinus angustifolius] >OIW01012.1 hypothetical protein TanjilG_14195 [Lupinus angustifolius]			PF01809(YidD:Putative membrane protein insertion efficiency factor)
TRINITY_DN13574_c0_g1		0.3167	5.7067	20.3267	5.7667	2.6767	5.7467	4.7133	4.1833	PREDICTED: 1-deoxy-D-xylulose 5-phosphate reductoisomerase, chloroplastic-like isoform X1 [Lupinus angustifolius] >XP_019449141.1 PREDICTED: 1-deoxy-D-xylulose 5-phosphate reductoisomerase, chloroplastic-like isoform X1 [Lupinus angustifolius]	COG0743(Catalyzes the NADP-dependent rearrangement and reduction of 1-deoxy-D-xylulose-5-phosphate (DXP) to 2-C-methyl-D-erythritol 4-phosphate (MEP) (By similarity))	sp|Q8W250|DXR_ORYSJ(1-deoxy-D-xylulose 5-phosphate reductoisomerase, chloroplastic OS=Oryza sativa subsp. japonica OX=39947 GN=DXR PE=2 SV=2)	PF02670(DXP_reductoisom:1-deoxy-D-xylulose 5-phosphate reductoisomerase); PF08436(DXP_redisom_C:1-deoxy-D-xylulose 5-phosphate reductoisomerase C-terminal domain); PF13288(DXPR_C:DXP reductoisomerase C-terminal domain)
TRINITY_DN13576_c0_g1		6.9533	31.8433	30.54	36.4333	14.84	21.48	18.5533	38.4633	hypothetical protein KK1_042921 [Cajanus cajan]	ENOG410YHD1(LSD1 zinc finger domain containing protein, expressed)	sp|Q93ZB1|LOL1_ARATH(Protein LOL1 OS=Arabidopsis thaliana OX=3702 GN=LOL1 PE=2 SV=1)	PF06943(zf-LSD1:LSD1 zinc finger)
TRINITY_DN13580_c0_g2		0.5433	0.13	0.9	0.7267	0.6167	0.3367	0	0.7333	trichome birefringence 33 [Spatholobus suberectus]	ENOG410ZJIP(leaf senescence related protein)	sp|F4IH21|TBL33_ARATH(Protein trichome birefringence-like 33 OS=Arabidopsis thaliana OX=3702 GN=TBL33 PE=2 SV=1)	PF13839(PC-Esterase:GDSL/SGNH-like Acyl-Esterase family found in Pmr5 and Cas1p)
TRINITY_DN13591_c0_g1		23.8467	21.96	44.75	14.9367	18.64	11.5	47.2467	50.5033	hypothetical protein TanjilG_02697 [Lupinus angustifolius]	COG0401(hydrophobic protein)	sp|A2Y075|LTI6B_ORYSI(Hydrophobic protein LTI6B OS=Oryza sativa subsp. indica OX=39946 GN=LTI6B PE=3 SV=2)	PF01679(Pmp3:Proteolipid membrane potential modulator)
TRINITY_DN13594_c0_g1		4.1733	40.49	83.0967	40.56	13.77	19.5433	28.23	43.7067	PREDICTED: GDSL esterase/lipase At5g33370-like [Lupinus angustifolius]	COG3240(GDSL esterase lipase)	sp|Q8LB81|GDL79_ARATH(GDSL esterase/lipase At5g33370 OS=Arabidopsis thaliana OX=3702 GN=At5g33370 PE=2 SV=1)	PF00657(Lipase_GDSL:GDSL-like Lipase/Acylhydrolase)
TRINITY_DN135_c0_g2		13.5633	50.0433	5.5733	31.7833	50.1467	20.2467	11.9033	29.92	PREDICTED: uncharacterized protein LOC109362225 isoform X1 [Lupinus angustifolius]	ENOG410ZEKZ(-); ENOG410YA0N(Protein of unknown function (DUF1644))
TRINITY_DN13600_c0_g1		0.4367	5.11	3.19	4.64	2.4633	4.19	4.1667	4.05	PREDICTED: uncharacterized protein LOC109356357 [Lupinus angustifolius] >OIW05400.1 hypothetical protein TanjilG_28865 [Lupinus angustifolius]	ENOG410Z7H6(-)
TRINITY_DN1361_c2_g1		53.81	70.2967	325.213	172.24	100.69	124.403	106.093	94.1833	LOW QUALITY PROTEIN: polyubiquitin-A [Jatropha curcas]		sp|P0CG85|UBI1P_NICSY(Polyubiquitin OS=Nicotiana sylvestris OX=4096 GN=UBI11 PE=2 SV=1)	PF00240(ubiquitin:Ubiquitin family); PF11976(Rad60-SLD:Ubiquitin-2 like Rad60 SUMO-like); PF14560(Ubiquitin_2:Ubiquitin-like domain); PF18396(TBK1_ULD:TANK binding kinase 1 ubiquitin-like domain); PF18037(Ubiquitin_5:Ubiquitin-like domain)
TRINITY_DN13620_c0_g1		27.7133	10.8667	0.2933	5.6133	6.1867	0	20.6467	0.4267	PREDICTED: putative pectinesterase/pectinesterase inhibitor 45 [Lupinus angustifolius] >OIV98338.1 hypothetical protein TanjilG_16665 [Lupinus angustifolius]	COG4677(pectinesterase)	sp|Q9SMY6|PME45_ARATH(Putative pectinesterase/pectinesterase inhibitor 45 OS=Arabidopsis thaliana OX=3702 GN=PME45 PE=2 SV=1)	PF01095(Pectinesterase:Pectinesterase)
TRINITY_DN13621_c0_g1		6.7733	2.3733	1.2633	3.34	3.4733	2.1167	5.23	2.15	PREDICTED: potassium channel SKOR isoform X1 [Lupinus angustifolius]	ENOG410XPSE(Potassium voltage-gated channel, subfamily H (Eag-related), member)	sp|Q9M8S6|SKOR_ARATH(Potassium channel SKOR OS=Arabidopsis thaliana OX=3702 GN=SKOR PE=1 SV=1)	PF13637(Ank_4:Ankyrin repeats (many copies)); PF12796(Ank_2:Ankyrin repeats (3 copies)); PF00520(Ion_trans:Ion transport protein); PF11834(KHA:KHA, dimerisation domain of potassium ion channel); PF13857(Ank_5:Ankyrin repeats (many copies)); PF13606(Ank_3:Ankyrin repeat); PF00023(Ank:Ankyrin repeat); PF00027(cNMP_binding:Cyclic nucleotide-binding domain); PF07885(Ion_trans_2:Ion channel)
TRINITY_DN13623_c0_g1		3.3167	8.7167	1.4333	1.2433	2.6433	2.8567	1.6333	2.8833	PREDICTED: uncharacterized protein LOC109347353 [Lupinus angustifolius] >OIW12464.1 hypothetical protein TanjilG_04213 [Lupinus angustifolius]	ENOG4111M1K(Protein of unknown function (DUF1997))		PF09366(DUF1997:Protein of unknown function (DUF1997))
TRINITY_DN13626_c0_g1		28.09	35.66	18.7433	6.9333	27.8567	43.8533	29.04	29.2867	hypothetical protein TanjilG_23534 [Lupinus angustifolius]	COG0465(Acts as a processive, ATP-dependent zinc metallopeptidase for both cytoplasmic and membrane proteins. Plays a role in the quality control of integral membrane proteins (By similarity))	sp|Q8VZI8|FTSHA_ARATH(ATP-dependent zinc metalloprotease FTSH 10, mitochondrial OS=Arabidopsis thaliana OX=3702 GN=FTSH10 PE=1 SV=1)
TRINITY_DN13628_c0_g1		0.4	0.5667	7.4267	1.3133	0.5933	1.6333	0.65	1.36	PREDICTED: uncharacterized protein LOC109345634 [Lupinus angustifolius] >OIW13667.1 hypothetical protein TanjilG_08009 [Lupinus angustifolius]	ENOG410ZK5T(SYNtaxin)		PF05553(DUF761:Cotton fibre expressed protein); PF14364(DUF4408:Domain of unknown function (DUF4408))
TRINITY_DN13631_c0_g1		9.2967	8.8667	5.66	15.0233	19.12	28.4833	11.8767	29.3733	hypothetical protein TanjilG_31906 [Lupinus angustifolius]	COG4886(leucine Rich Repeat)	sp|Q9T048|DRL27_ARATH(Disease resistance protein At4g27190 OS=Arabidopsis thaliana OX=3702 GN=At4g27190 PE=2 SV=1)	PF12799(LRR_4:Leucine Rich repeats (2 copies)); PF13855(LRR_8:Leucine rich repeat)
TRINITY_DN13633_c0_g1		93.58	0	155.423	139.057	34.0533	120.997	65.28	92.9667
TRINITY_DN13641_c0_g1		17.93	5.0867	1.0967	5.91	9.8233	4.8567	13.5033	3.6833	PREDICTED: probable galacturonosyltransferase-like 4 [Lupinus angustifolius] >OIW00047.1 hypothetical protein TanjilG_26384 [Lupinus angustifolius]	ENOG410YCH5(helicase)	sp|Q9M8J2|GATL4_ARATH(Probable galacturonosyltransferase-like 4 OS=Arabidopsis thaliana OX=3702 GN=GATL4 PE=2 SV=1)	PF01501(Glyco_transf_8:Glycosyl transferase family 8); PF18404(Glyco_transf_24:Glucosyltransferase 24)
TRINITY_DN13644_c0_g1		299.247	266.633	153.423	264.09	195.593	217.25	818.783	417.133	PREDICTED: MLP-like protein 423 [Lupinus angustifolius] >OIV93088.1 hypothetical protein TanjilG_20750 [Lupinus angustifolius]	ENOG410YSJN(MLP-like protein)	sp|Q93VR4|ML423_ARATH(MLP-like protein 423 OS=Arabidopsis thaliana OX=3702 GN=MLP423 PE=2 SV=1)	PF00407(Bet_v_1:Pathogenesis-related protein Bet v I family); PF10604(Polyketide_cyc2:Polyketide cyclase / dehydrase and lipid transport)
TRINITY_DN13645_c0_g1		0.3833	0.79	2.7467	0.2967	0.27	0.4933	0.4033	0.7433	PREDICTED: sucrose transport protein SUC8-like [Lupinus angustifolius] >OIV90660.1 hypothetical protein TanjilG_23773 [Lupinus angustifolius]	ENOG410XPTR(solute carrier family 45 member)	sp|Q39231|SUC2_ARATH(Sucrose transport protein SUC2 OS=Arabidopsis thaliana OX=3702 GN=SUC2 PE=1 SV=2)	PF13347(MFS_2:MFS/sugar transport protein); PF07690(MFS_1:Major Facilitator Superfamily)
TRINITY_DN13651_c0_g1		28.9667	23.0833	4.2067	2.2867	27.4933	1.4467	10.27	13.2	hypothetical protein TanjilG_01302 [Lupinus angustifolius]	ENOG410XPSE(Potassium voltage-gated channel, subfamily H (Eag-related), member)	sp|Q9FXH6|CNGC8_ARATH(Putative cyclic nucleotide-gated ion channel 8 OS=Arabidopsis thaliana OX=3702 GN=CNGC8 PE=3 SV=2)
TRINITY_DN13663_c0_g1		8.0633	24.0433	92.4967	21.33	18.5167	31.4767	179.207	1283.74	putative defensin 2.1 precursor [Medicago sativa]		sp|B3EWP3|DEF1_ARAHY(Defensin 1 (Fragment) OS=Arachis hypogaea OX=3818 PE=1 SV=1)	PF00304(Gamma-thionin:Gamma-thionin family)
TRINITY_DN13666_c1_g1		0.09	0.88	1.81	0.7267	0.5167	0.64	0.61	0.5567	hypothetical protein TanjilG_30210 [Lupinus angustifolius]	COG5048(Zinc finger protein)	sp|Q8H1F5|IDD7_ARATH(Protein indeterminate-domain 7 OS=Arabidopsis thaliana OX=3702 GN=IDD7 PE=2 SV=1)	PF00096(zf-C2H2:Zinc finger, C2H2 type); PF12171(zf-C2H2_jaz:Zinc-finger double-stranded RNA-binding)
TRINITY_DN13672_c0_g1		0.06	0.22	0.88	0.04	0.2933	0.2033	0.1533	0.1967	PREDICTED: sucrose transport protein SUC9-like [Lupinus angustifolius] >OIW01400.1 hypothetical protein TanjilG_25696 [Lupinus angustifolius]	ENOG410XPTR(solute carrier family 45 member)	sp|Q39232|SUC1_ARATH(Sucrose transport protein SUC1 OS=Arabidopsis thaliana OX=3702 GN=SUC1 PE=1 SV=1)	PF13347(MFS_2:MFS/sugar transport protein)
TRINITY_DN13676_c0_g1		0.7767	2.0867	3.73	2.0033	1.86	5.1667	1.5667	1.6467	PREDICTED: cytochrome P450 711A1 [Lupinus angustifolius]	COG2124(Snare associated golgi protein)	sp|B9DFU2|MAX1_ARATH(Cytochrome P450 711A1 OS=Arabidopsis thaliana OX=3702 GN=CYP711A1 PE=2 SV=1)	PF00067(p450:Cytochrome P450)
TRINITY_DN1367_c0_g1		61.3433	61.0167	22.68	12.1067	13.45	33.2	62.6033	37.1467	PREDICTED: vacuolar cation/proton exchanger 3-like [Lupinus angustifolius] >OIW07454.1 hypothetical protein TanjilG_24316 [Lupinus angustifolius]	COG0387(Calcium Proton)	sp|Q93Z81|CAX3_ARATH(Vacuolar cation/proton exchanger 3 OS=Arabidopsis thaliana OX=3702 GN=CAX3 PE=1 SV=1)	PF01699(Na_Ca_ex:Sodium/calcium exchanger protein)
TRINITY_DN1367_c0_g2		70.3133	216.31	358.12	314.013	289.557	328.613	89.4233	170.913	PREDICTED: vacuolar cation/proton exchanger 3-like isoform X1 [Lupinus angustifolius] >XP_019413187.1 PREDICTED: vacuolar cation/proton exchanger 3-like isoform X2 [Lupinus angustifolius] >OIV98583.1 hypothetical protein TanjilG_12169 [Lupinus angustifolius]	COG0387(Calcium Proton)	sp|Q93Z81|CAX3_ARATH(Vacuolar cation/proton exchanger 3 OS=Arabidopsis thaliana OX=3702 GN=CAX3 PE=1 SV=1)	PF01699(Na_Ca_ex:Sodium/calcium exchanger protein)
TRINITY_DN1367_c1_g1		1.7333	10.5567	12.8533	7.36	5.7067	8.26	2.9533	4.7067	PREDICTED: vacuolar cation/proton exchanger 3-like isoform X1 [Lupinus angustifolius] >XP_019446115.1 PREDICTED: vacuolar cation/proton exchanger 3-like isoform X1 [Lupinus angustifolius] >OIW19107.1 hypothetical protein TanjilG_08907 [Lupinus angustifolius]	COG0387(Calcium Proton)	sp|Q93Z81|CAX3_ARATH(Vacuolar cation/proton exchanger 3 OS=Arabidopsis thaliana OX=3702 GN=CAX3 PE=1 SV=1)	PF01699(Na_Ca_ex:Sodium/calcium exchanger protein)
TRINITY_DN13687_c0_g1		6.9067	7.13	3.7467	3.13	4.89	3.3	19.2867	4.3467	Zinc finger protein CONSTANS-LIKE 13 [Cajanus cajan]	ENOG411168W(BBOX)	sp|Q1G3I2|MIP1A_ARATH(B-box domain protein 30 OS=Arabidopsis thaliana OX=3702 GN=MIP1A PE=1 SV=1)	PF00643(zf-B_box:B-box zinc finger)
TRINITY_DN13692_c0_g2		0.25	0.3267	0	0.2467	0.59	0.4933	0.1467	0.4567	PREDICTED: leucoanthocyanidin dioxygenase-like isoform X1 [Lupinus angustifolius]
TRINITY_DN13694_c0_g1		0.1367	0	0.24	0.0467	0.1767	0.4967	0.1033	0.11	PREDICTED: uncharacterized protein LOC109353840 [Lupinus angustifolius]		sp|O00370|LORF2_HUMAN(LINE-1 retrotransposable element ORF2 protein OS=Homo sapiens OX=9606 PE=1 SV=1)	PF00078(RVT_1:Reverse transcriptase (RNA-dependent DNA polymerase))
TRINITY_DN13696_c0_g1		27.27	7.9633	1.7433	9.1167	13.7167	6.8333	20.3467	5.7933	PREDICTED: phosphatidylinositol 3,4,5-trisphosphate 3-phosphatase and protein-tyrosine-phosphatase PTEN1-like [Lupinus angustifolius] >OIW05404.1 hypothetical protein TanjilG_28869 [Lupinus angustifolius]	COG2453(dual specificity phosphatase)	sp|Q9FLZ5|PTEN1_ARATH(Phosphatidylinositol 3,4,5-trisphosphate 3-phosphatase and protein-tyrosine-phosphatase PTEN1 OS=Arabidopsis thaliana OX=3702 GN=PTEN1 PE=1 SV=1)	PF10409(PTEN_C2:C2 domain of PTEN tumour-suppressor protein)
TRINITY_DN13696_c0_g2		15.5067	4.96	0.8333	5.2967	7.3933	3.5767	12.04	2.45	PREDICTED: phosphatidylinositol 3,4,5-trisphosphate 3-phosphatase and protein-tyrosine-phosphatase PTEN1-like [Lupinus angustifolius]	COG2453(dual specificity phosphatase)	sp|Q9FLZ5|PTEN1_ARATH(Phosphatidylinositol 3,4,5-trisphosphate 3-phosphatase and protein-tyrosine-phosphatase PTEN1 OS=Arabidopsis thaliana OX=3702 GN=PTEN1 PE=1 SV=1)	PF10409(PTEN_C2:C2 domain of PTEN tumour-suppressor protein); PF00782(DSPc:Dual specificity phosphatase, catalytic domain); PF13350(Y_phosphatase3:Tyrosine phosphatase family); PF00102(Y_phosphatase:Protein-tyrosine phosphatase)
TRINITY_DN13700_c0_g1		55.6467	15.3867	4.3	17.7467	27.7467	15.1467	34.39	11.2733	PREDICTED: phosphatidylinositol 4-kinase gamma 2-like [Lupinus angustifolius] >OIV94939.1 hypothetical protein TanjilG_22136 [Lupinus angustifolius]	ENOG410XP06(Phosphatidylinositol 4-kinase type)	sp|Q9SGW8|P4KG2_ARATH(Phosphatidylinositol 4-kinase gamma 2 OS=Arabidopsis thaliana OX=3702 GN=PI4KG2 PE=1 SV=2)	PF00454(PI3_PI4_kinase:Phosphatidylinositol 3- and 4-kinase)
TRINITY_DN13700_c0_g2		39.45	13.8767	2.44	10.62	22.0333	8.9833	21.6167	8.48	PREDICTED: phosphatidylinositol 4-kinase gamma 2-like [Lupinus angustifolius] >OIV94939.1 hypothetical protein TanjilG_22136 [Lupinus angustifolius]	ENOG410XP06(Phosphatidylinositol 4-kinase type)	sp|Q9FNF8|P4KG3_ARATH(Phosphatidylinositol 4-kinase gamma 3 OS=Arabidopsis thaliana OX=3702 GN=PI4KG3 PE=2 SV=1)	PF00240(ubiquitin:Ubiquitin family); PF11976(Rad60-SLD:Ubiquitin-2 like Rad60 SUMO-like)
TRINITY_DN13702_c0_g1		0.0467	0.2433	0	0.04	0.1767	0	3.2667	0.7033	hypothetical protein TanjilG_10244 [Lupinus angustifolius]	COG0176(Transaldolase is important for the balance of metabolites in the pentose-phosphate pathway (By similarity))	sp|A8KYS5|TAL_FRASN(Transaldolase OS=Frankia sp. (strain EAN1pec) OX=298653 GN=tal PE=3 SV=1)	PF00923(TAL_FSA:Transaldolase/Fructose-6-phosphate aldolase)
TRINITY_DN13703_c0_g1		1977.65	614.203	98.6167	728.627	1234.88	720.987	1581.81	283.28	hypothetical protein TanjilG_15373 [Lupinus angustifolius]			PF05498(RALF:Rapid ALkalinization Factor (RALF))
TRINITY_DN13713_c1_g1		1.41	0.3567	0.5067	1.11	0	0	0.0867	0
TRINITY_DN13715_c0_g1		0.48	0.67	0.1767	0.1733	0.0367	0.0933	4.11	0.73	polyadenylate-binding protein RBP47C-like isoform X2 [Abrus precatorius]	COG0724(Rna-binding protein)	sp|Q9SX80|R47CP_ARATH(Polyadenylate-binding protein RBP47C' OS=Arabidopsis thaliana OX=3702 GN=RBP47C' PE=2 SV=1)	PF00076(RRM_1:RNA recognition motif. (a.k.a. RRM, RBD, or RNP domain)); PF13893(RRM_5:RNA recognition motif. (a.k.a. RRM, RBD, or RNP domain)); PF14605(Nup35_RRM_2:Nup53/35/40-type RNA recognition motif); PF08777(RRM_3:RNA binding motif); PF16842(RRM_occluded:Occluded RNA-recognition motif)
TRINITY_DN13729_c0_g1		9.3333	9.9933	9.3367	2.3667	2.77	22.41	1.41	6.4133	PREDICTED: beta-amyrin 28-oxidase-like [Lupinus angustifolius] >OIW00549.1 hypothetical protein TanjilG_24279 [Lupinus angustifolius]	COG2124(Cytochrome p450)	sp|Q2MJ20|C7A12_MEDTR(Beta-amyrin 28-monooxygenase OS=Medicago truncatula OX=3880 GN=CYP716A12 PE=1 SV=1)
TRINITY_DN1372_c3_g1		0.46	0.2667	0	0.6267	1.07	1.1333	0.07	0.2267
TRINITY_DN13730_c0_g1		0.7033	0.6533	3.3967	1.42	1.2167	1.48	24.82	12.0933	PREDICTED: (+	COG1028(Dehydrogenase reductase)	sp|B2X050|MNR1_CAPAN((+)-neomenthol dehydrogenase OS=Capsicum annuum OX=4072 GN=MNR1 PE=1 SV=1)	PF00106(adh_short:short chain dehydrogenase); PF13561(adh_short_C2:Enoyl-(Acyl carrier protein) reductase)
TRINITY_DN13744_c0_g2		0.68	0.9067	3.8067	1.3267	3.0567	4.9167	2.52	1.75	PREDICTED: uncharacterized protein LOC109328025 [Lupinus angustifolius] >OIV96388.1 hypothetical protein TanjilG_09815 [Lupinus angustifolius]	ENOG41117ZZ(CONTAINS InterPro DOMAIN s Uncharacterised conserved protein UCP031279 (InterPro IPR016972)); ENOG410Z59D(-)
TRINITY_DN13745_c0_g1		1.1767	0.1467	0.13	0.17	0.2033	0.2133	1.22	0.1767	PREDICTED: U-box domain-containing protein 15-like [Lupinus angustifolius] >OIV90502.1 hypothetical protein TanjilG_32379 [Lupinus angustifolius]	ENOG410XRTN(-); ENOG410Y9VA(-)	sp|Q5VRH9|PUB12_ORYSJ(U-box domain-containing protein 12 OS=Oryza sativa subsp. japonica OX=39947 GN=PUB12 PE=2 SV=1)	PF00514(Arm:Armadillo/beta-catenin-like repeat)
TRINITY_DN13761_c0_g1		4.86	1.2067	0.3067	0.8833	0.93	0.5	4.44	0.68	PREDICTED: uncharacterized protein LOC109358421 [Lupinus angustifolius]	ENOG410YZRX(NOI protein); ENOG410Y7RT(NOI protein)	sp|O22633|NOI4_ARATH(Protein NOI4 OS=Arabidopsis thaliana OX=3702 GN=NOI4 PE=1 SV=1)
TRINITY_DN13783_c0_g1		12.3433	1.55	6.4	9.5633	4.9033	2.7	0.63	6.8167	hypothetical protein TanjilG_18942 [Lupinus angustifolius]	COG0526(Thioredoxin)	sp|Q67UF5|PDI23_ORYSJ(Protein disulfide isomerase-like 2-3 OS=Oryza sativa subsp. japonica OX=39947 GN=PDIL2-3 PE=2 SV=1)	PF00085(Thioredoxin:Thioredoxin)
TRINITY_DN1378_c5_g1		0.12	0.3267	1.3767	0.55	0.7967	0.8167	0.78	0.9733	PREDICTED: uncharacterized protein LOC109326337 [Lupinus angustifolius]			PF14223(Retrotran_gag_2:gag-polypeptide of LTR copia-type); PF00098(zf-CCHC:Zinc knuckle)
TRINITY_DN13792_c0_g2		2.3733	3.5733	0.5767	0.9167	1.3967	0.98	5.88	3.05	PREDICTED: myb-related protein 330-like [Lupinus angustifolius]	COG5147(Myblike DNAbinding domain containing protein)	sp|O22264|MYB12_ARATH(Transcription factor MYB12 OS=Arabidopsis thaliana OX=3702 GN=MYB12 PE=1 SV=1)	PF00249(Myb_DNA-binding:Myb-like DNA-binding domain); PF13921(Myb_DNA-bind_6:Myb-like DNA-binding domain)
TRINITY_DN13807_c0_g1		9.7767	21.34	63.4567	18.83	35.6533	15.8167	17.99	114.617	PREDICTED: protein DETOXIFICATION 40-like [Lupinus angustifolius]	COG0534(Mate efflux family protein)	sp|Q9LVD9|DTX40_ARATH(Protein DETOXIFICATION 40 OS=Arabidopsis thaliana OX=3702 GN=DTX40 PE=1 SV=1)	PF01554(MatE:MatE)
TRINITY_DN13809_c0_g1		0.51	0	0.24	0.1867	0.6033	1.2233	0	0.2667
TRINITY_DN13816_c0_g1		2.7567	3.8833	8.23	4.1267	1.6567	3.05	4.07	4.55
TRINITY_DN13823_c0_g1		339.987	84.5733	22.6733	122.327	215.533	82.3467	279.74	52.7333	PREDICTED: uncharacterized protein LOC109344821 [Lupinus angustifolius]	ENOG410YUUD(alpha-glucan water dikinase)		PF04043(PMEI:Plant invertase/pectin methylesterase inhibitor)
TRINITY_DN13826_c1_g2		0.7033	1.2867	5.9133	2.5667	1.5933	1.8167	1.1967	1.8133	DnaJ protein-like [Spatholobus suberectus]	COG0484(Sigma factors are initiation factors that promote the attachment of RNA polymerase to specific initiation sites and are then released (By similarity))	sp|Q94AW8|DNAJ3_ARATH(Chaperone protein dnaJ 3 OS=Arabidopsis thaliana OX=3702 GN=ATJ3 PE=1 SV=2)	PF02826(2-Hacid_dh_C:D-isomer specific 2-hydroxyacid dehydrogenase, NAD binding domain); PF01556(DnaJ_C:DnaJ C terminal domain)
TRINITY_DN13836_c0_g2		0.4267	1.1233	1.3133	1.3833	0.6433	0.04	2.1133	1.32	PREDICTED: probable disease resistance protein At4g27220 isoform X1 [Lupinus angustifolius] >XP_019443816.1 PREDICTED: probable disease resistance protein At4g27220 isoform X1 [Lupinus angustifolius] >XP_019443817.1 PREDICTED: probable disease resistance protein At4g27220 isoform X1 [Lupinus angustifolius] >XP_019443818.1 PREDICTED: probable disease resistance protein At4g27220 isoform X1 [Lupinu…	COG4886(leucine Rich Repeat)	sp|Q42484|RPS2_ARATH(Disease resistance protein RPS2 OS=Arabidopsis thaliana OX=3702 GN=RPS2 PE=1 SV=1)	PF12799(LRR_4:Leucine Rich repeats (2 copies))
TRINITY_DN13837_c1_g1		0.1267	3.2733	0.0867	0.1033	0.0333	6.76	1.8	0.26	PREDICTED: protein DMR6-LIKE OXYGENASE 1-like [Lupinus angustifolius] >XP_019445554.1 PREDICTED: protein DMR6-LIKE OXYGENASE 1-like [Lupinus angustifolius] >OIW10449.1 hypothetical protein TanjilG_00387 [Lupinus angustifolius]	COG3491(2OGFe(II) oxygenase)
TRINITY_DN1385_c1_g1		1.2633	0.3467	0.5867	0.07	0	0	0.3267	0.49
TRINITY_DN13870_c0_g1		12.1633	1.5767	0.1667	1.7233	1.1067	0.2333	20.5733	0.8467	uncharacterized protein LOC111303461 [Durio zibethinus] >XP_022755478.1 uncharacterized protein LOC111303461 [Durio zibethinus]	ENOG410Y3AQ(-)
TRINITY_DN13878_c0_g1		1.0967	1.0167	0.6467	3.55	0.7867	0	1.3867	2.3433
TRINITY_DN1387_c0_g2		9.1833	3.4033	1.3333	4.58	4.0667	2.21	6.35	1.6667	PREDICTED: probable CCR4-associated factor 1 homolog 7 [Lupinus angustifolius]	COG5228(Ccr4-not transcription complex, subunit)	sp|Q9SKZ2|CAF1G_ARATH(Probable CCR4-associated factor 1 homolog 7 OS=Arabidopsis thaliana OX=3702 GN=CAF1-7 PE=2 SV=2)	PF04857(CAF1:CAF1 family ribonuclease)
TRINITY_DN13881_c1_g1		53.7867	2.7333	2.2267	17.81	0	4.4533	10.73	17.78	ADP-ribosylation factor A1B [Arabidopsis thaliana] >CAB87634.1 ADP-ribosylation factor-like protein [Arabidopsis thaliana] >AED92061.1 ADP-ribosylation factor A1B [Arabidopsis thaliana]	COG1100(GTP-binding Protein)	sp|P36397|ARF1_ARATH(ADP-ribosylation factor 1 OS=Arabidopsis thaliana OX=3702 GN=ARF1 PE=1 SV=2)	PF00025(Arf:ADP-ribosylation factor family); PF08477(Roc:Ras of Complex, Roc, domain of DAPkinase); PF00503(G-alpha:G-protein alpha subunit); PF00071(Ras:Ras family); PF04670(Gtr1_RagA:Gtr1/RagA G protein conserved region); PF09439(SRPRB:Signal recognition particle receptor beta subunit)
TRINITY_DN13893_c0_g1		6.5667	2.6767	0.28	2.93	3.5967	1.6033	5.7133	1.5633	PREDICTED: probable lipid phosphate phosphatase 4 [Lupinus angustifolius] >XP_019459756.1 PREDICTED: probable lipid phosphate phosphatase 4 [Lupinus angustifolius]	COG0671(smr domain containing protein)	sp|Q0WNG6|LPP4_ARATH(Probable lipid phosphate phosphatase 4 OS=Arabidopsis thaliana OX=3702 GN=LPP4 PE=2 SV=1)	PF01569(PAP2:PAP2 superfamily); PF14378(PAP2_3:PAP2 superfamily)
TRINITY_DN13897_c0_g1		1.8333	12.4767	0.8633	3.7333	0.1567	0.3367	2.6067	1.73
TRINITY_DN13900_c0_g1		3.9667	3.33	2.33	7.05	5.7533	0	0.0133	1.6867	hypothetical protein TanjilG_28150 [Lupinus angustifolius]	ENOG410XTFH(Exostosin)	sp|Q9FLA5|ARAD2_ARATH(Probable arabinosyltransferase ARAD2 OS=Arabidopsis thaliana OX=3702 GN=ARAD2 PE=1 SV=1)
TRINITY_DN1390_c0_g2		0.52	1.39	7.7767	1.3433	0.7533	2.89	1.1833	13.8967	PREDICTED: transcription factor bHLH66-like [Lupinus angustifolius] >XP_019417751.1 PREDICTED: transcription factor bHLH66-like [Lupinus angustifolius]	ENOG4111MVP(Transcription factor)	sp|Q9ZUG9|BH066_ARATH(Transcription factor bHLH66 OS=Arabidopsis thaliana OX=3702 GN=BHLH66 PE=1 SV=1)
TRINITY_DN13918_c0_g2		4.7167	8.5933	2.83	8.56	11.2067	6.06	8.6467	6.9567	PREDICTED: uncharacterized protein LOC109343846 isoform X4 [Lupinus angustifolius]	ENOG41115PE(-)		PF14309(DUF4378:Domain of unknown function (DUF4378))
TRINITY_DN13923_c0_g1		22.0167	10.4733	1.6533	6.7533	11.7467	5.08	18.61	4.6333	PREDICTED: kinesin-like protein KIN-14I isoform X1 [Lupinus angustifolius] >XP_019422757.1 PREDICTED: kinesin-like protein KIN-14I isoform X1 [Lupinus angustifolius]		sp|F4IL57|KN14I_ARATH(Kinesin-like protein KIN-14I OS=Arabidopsis thaliana OX=3702 GN=KIN14I PE=2 SV=1)	PF00225(Kinesin:Kinesin motor domain)
TRINITY_DN13947_c0_g1		84.2467	46.6333	153.007	74.2967	48.8	38.1167	24.3067	37.8333	PREDICTED: ervatamin-B-like [Lupinus angustifolius] >OIW01314.1 hypothetical protein TanjilG_10475 [Lupinus angustifolius]	COG4870(cathepsin)		PF08246(Inhibitor_I29:Cathepsin propeptide inhibitor domain (I29))
TRINITY_DN13955_c0_g1		2.4633	9.5033	0.7333	2.1467	1.04	0	2.0133	1.28	somatic embryogenesis receptor kinase 2 [Medicago truncatula] >AAN64293.1 somatic embryogenesis receptor kinase 1 [Medicago truncatula] >AAN64294.1 somatic embryogenesis receptor kinase 1 [Medicago truncatula] >KEH43597.1 somatic embryogenesis receptor-like kinase [Medicago truncatula] >RHN81598.1 putative transferase, protein kinase RLK-Pelle-LRR-II family [Medicago truncatula]	ENOG410ZNK7(Somatic embryogenesis receptor kinase)	sp|Q94AG2|SERK1_ARATH(Somatic embryogenesis receptor kinase 1 OS=Arabidopsis thaliana OX=3702 GN=SERK1 PE=1 SV=2)	PF00069(Pkinase:Protein kinase domain); PF07714(Pkinase_Tyr:Protein tyrosine kinase)
TRINITY_DN13960_c0_g1		18.3067	17.88	31.3633	22.8867	23.4	46.79	10.7533	38.1433	PREDICTED: GEM-like protein 1 [Lupinus angustifolius] >OIW06067.1 hypothetical protein TanjilG_29823 [Lupinus angustifolius]	ENOG410YCSJ(GEM-like protein); ENOG41104VN(GRAM)	sp|Q9SE96|GEML1_ARATH(GEM-like protein 1 OS=Arabidopsis thaliana OX=3702 GN=FIP1 PE=1 SV=1)	PF02893(GRAM:GRAM domain)
TRINITY_DN13969_c0_g1		17.1167	17.22	19.1367	25.7967	18.44	53.46	30.33	18.91	PREDICTED: probable disease resistance protein At4g27220 isoform X3 [Lupinus angustifolius]	ENOG41115K7(-); COG4886(leucine Rich Repeat)
TRINITY_DN13977_c0_g1		4.4933	1.0633	0	1.06	0.8067	2.2633	3.22	2.2267	ABC transporter I family member 21 [Cicer arietinum]	COG4586((ABC) transporter)	sp|Q3EDJ0|AB19I_ARATH(ABC transporter I family member 19 OS=Arabidopsis thaliana OX=3702 GN=ABCI19 PE=2 SV=1)
TRINITY_DN13982_c0_g1		25.0867	3.67	0.3533	0.32	3.99	9.26	6.6433	1.3967	hypothetical protein TanjilG_05516 [Lupinus angustifolius]	ENOG410XS0B(eukaryotic translation initiation factor 2alpha kinase)
TRINITY_DN13993_c0_g1		3.7833	0.8833	0.0533	0.45	0.8233	0.4867	3.3067	0.4533	PREDICTED: uncharacterized protein LOC109334572 [Lupinus angustifolius]
TRINITY_DN13997_c0_g1		4.55	1.1033	0.6567	1.04	3.0133	1.0267	2.11	0.6933	hypothetical protein TanjilG_15991 [Lupinus angustifolius]	ENOG410Y9Y9(Kinase interacting)	sp|Q94CG5|KIP1_PETIN(Kinase-interacting protein 1 OS=Petunia integrifolia OX=4103 GN=KIP1 PE=1 SV=1)
TRINITY_DN13999_c0_g1		0	0	3.0967	9.1733	5.8	0	0	0	PREDICTED: protein RRP6-like 2 isoform X1 [Lupinus angustifolius] >OIV90079.1 hypothetical protein TanjilG_01533 [Lupinus angustifolius]	COG0349(Exonuclease involved in the 3' processing of various precursor tRNAs. Initiates hydrolysis at the 3'-terminus of an RNA molecule and releases 5'-mononucleotides (By similarity))	sp|A9LLI7|RP6L2_ARATH(Protein RRP6-like 2 OS=Arabidopsis thaliana OX=3702 GN=RRP6L2 PE=2 SV=1)	PF00570(HRDC:HRDC domain)
TRINITY_DN13_c0_g1		634.16	215.32	37.1267	229.573	322.587	163.28	470.923	132.537	PREDICTED: beta-galactosidase 13-like [Lupinus angustifolius] >OIW14712.1 hypothetical protein TanjilG_33054 [Lupinus angustifolius]	COG1874(beta-galactosidase)	sp|Q9SCU9|BGA13_ARATH(Beta-galactosidase 13 OS=Arabidopsis thaliana OX=3702 GN=BGAL13 PE=2 SV=1)	PF01301(Glyco_hydro_35:Glycosyl hydrolases family 35); PF17834(GHD:Beta-sandwich domain in beta galactosidase); PF02140(Gal_Lectin:Galactose binding lectin domain); PF02449(Glyco_hydro_42:Beta-galactosidase); PF13364(BetaGal_dom4_5:Beta-galactosidase jelly roll domain)
TRINITY_DN14004_c0_g1		4.6467	27.4033	52.9533	42.7167	11.8267	34.6067	25.73	20.6533	hypothetical protein TanjilG_28885 [Lupinus angustifolius]	ENOG41114YU(Proline-rich protein); ENOG410YKTH(AAI)	sp|Q00451|PRF1_SOLLC(36.4 kDa proline-rich protein OS=Solanum lycopersicum OX=4081 GN=TPRP-F1 PE=2 SV=1)	PF14547(Hydrophob_seed:Hydrophobic seed protein); PF14368(LTP_2:Probable lipid transfer); PF00234(Tryp_alpha_amyl:Protease inhibitor/seed storage/LTP family)
TRINITY_DN14004_c0_g2		0.27	5.8667	19.6867	8.6467	1.7167	5.5467	3.4133	5.8867	PREDICTED: 36.4 kDa proline-rich protein-like isoform X1 [Lupinus angustifolius] >OIW05401.1 hypothetical protein TanjilG_28866 [Lupinus angustifolius]	ENOG41114YU(Proline-rich protein); ENOG410YKTH(Proline-rich protein)	sp|Q00451|PRF1_SOLLC(36.4 kDa proline-rich protein OS=Solanum lycopersicum OX=4081 GN=TPRP-F1 PE=2 SV=1)	PF14547(Hydrophob_seed:Hydrophobic seed protein); PF14368(LTP_2:Probable lipid transfer); PF00234(Tryp_alpha_amyl:Protease inhibitor/seed storage/LTP family)
TRINITY_DN14007_c0_g1		6.1367	3.7967	0	2.2567	5.46	0	0	24.9867	PREDICTED: 4-hydroxy-3-methylbut-2-en-1-yl diphosphate synthase (ferredoxin	COG0821(4-hydroxy-3-methylbut-2-en-1-yl diphosphate synthase activity)	sp|F4K0E8|ISPG_ARATH(4-hydroxy-3-methylbut-2-en-1-yl diphosphate synthase (ferredoxin), chloroplastic OS=Arabidopsis thaliana OX=3702 GN=ISPG PE=1 SV=1)	PF04551(GcpE:GcpE protein)
TRINITY_DN14010_c0_g1		69.4067	24.0767	7.1933	27.22	35.6767	20.86	51.2367	14.18	PREDICTED: phosphatidylinositol/phosphatidylcholine transfer protein SFH3-like isoform X2 [Lupinus angustifolius]	ENOG410XRSQ(Transfer protein)	sp|Q9SI13|SFH10_ARATH(Phosphatidylinositol/phosphatidylcholine transfer protein SFH10 OS=Arabidopsis thaliana OX=3702 GN=SFH10 PE=3 SV=1)	PF00650(CRAL_TRIO:CRAL/TRIO domain); PF03765(CRAL_TRIO_N:CRAL/TRIO, N-terminal domain); PF13716(CRAL_TRIO_2:Divergent CRAL/TRIO domain)
TRINITY_DN14010_c0_g2		86.4867	26.4533	5.08	33.46	41.9233	22.2567	61.5333	17.0067	PREDICTED: phosphatidylinositol/phosphatidylcholine transfer protein SFH12-like isoform X3 [Lupinus angustifolius]	ENOG410XRSQ(Transfer protein)	sp|Q94A34|SFH12_ARATH(Phosphatidylinositol/phosphatidylcholine transfer protein SFH12 OS=Arabidopsis thaliana OX=3702 GN=SFH12 PE=2 SV=1)	PF00650(CRAL_TRIO:CRAL/TRIO domain); PF03765(CRAL_TRIO_N:CRAL/TRIO, N-terminal domain)
TRINITY_DN14015_c0_g1		25.9567	6.9933	1.6367	8.6933	14.4033	5.4433	21.0867	3.9467	PREDICTED: probable receptor-like protein kinase At4g39110 [Lupinus angustifolius] >OIW06181.1 hypothetical protein TanjilG_15065 [Lupinus angustifolius]	COG0515(Serine Threonine protein kinase)	sp|Q9T020|Y4391_ARATH(Probable receptor-like protein kinase At4g39110 OS=Arabidopsis thaliana OX=3702 GN=At4g39110 PE=3 SV=1)
TRINITY_DN14032_c0_g1		19.0567	3.3233	3.1633	3.8233	3.3067	2.75	18.61	4.0667
TRINITY_DN14039_c0_g1		2.2167	0.5833	0.3067	1.0533	0.3767	0.3933	4.22	1.6333	PREDICTED: proline-rich protein 4-like isoform X1 [Lupinus angustifolius] >XP_019438223.1 PREDICTED: proline-rich protein 4-like isoform X1 [Lupinus angustifolius]	ENOG410YNJG(Proline-rich protein)	sp|Q9T0I5|PRP4_ARATH(Proline-rich protein 4 OS=Arabidopsis thaliana OX=3702 GN=PRP4 PE=2 SV=1)	PF01190(Pollen_Ole_e_I:Pollen proteins Ole e I like)
TRINITY_DN14048_c0_g1		0.4333	1.25	1	0	0	1.7533	0	5.0867
TRINITY_DN14049_c0_g1		0.2833	0.2267	0.2067	1.81	0.63	0.49	0.4667	6.4033	PREDICTED: uncharacterized protein LOC109329191 [Lupinus angustifolius]	ENOG410Y65V(Retrotransposon protein); ENOG410YADE(Reverse transcriptase (RNA-dependent DNA polymerase)); ENOG4111K5V(Reverse transcriptase (RNA-dependent DNA polymerase)); ENOG4111MK6(Retrotransposon protein)	sp|P0C2F6|RNHX1_ARATH(Putative ribonuclease H protein At1g65750 OS=Arabidopsis thaliana OX=3702 GN=At1g65750 PE=3 SV=1)	PF13966(zf-RVT:zinc-binding in reverse transcriptase)
TRINITY_DN14050_c0_g1		0.1367	1.1667	2.6367	1.9267	0.2233	1.6333	0.3833	0.7933	PREDICTED: uncharacterized protein LOC109337285 [Lupinus angustifolius] >OIW19565.1 hypothetical protein TanjilG_21229 [Lupinus angustifolius]	ENOG410YTQ9(-)
TRINITY_DN14057_c0_g1		0.41	0.99	2.39	0.62	0.5	1.1433	6.1167	7.85	PREDICTED: ABC transporter C family member 10-like isoform X1 [Lupinus angustifolius] >XP_019442086.1 PREDICTED: ABC transporter C family member 10-like isoform X1 [Lupinus angustifolius] >XP_019442087.1 PREDICTED: ABC transporter C family member 10-like isoform X1 [Lupinus angustifolius] >OIW12544.1 hypothetical protein TanjilG_04708 [Lupinus angustifolius]	COG1132((ABC) transporter)	sp|Q9LYS2|AB10C_ARATH(ABC transporter C family member 10 OS=Arabidopsis thaliana OX=3702 GN=ABCC10 PE=2 SV=2)	PF00664(ABC_membrane:ABC transporter transmembrane region)
TRINITY_DN14062_c1_g1		1.71	2.7667	8.1133	3.9133	7.9533	9.9833	9.02	6.21	PREDICTED: probable WRKY transcription factor 15 isoform X3 [Lupinus angustifolius]	ENOG410YD1E(esterase); ENOG410YIPU(Transcription factor)	sp|O22176|WRK15_ARATH(Probable WRKY transcription factor 15 OS=Arabidopsis thaliana OX=3702 GN=WRKY15 PE=2 SV=1)	PF03106(WRKY:WRKY DNA -binding domain); PF10533(Plant_zn_clust:Plant zinc cluster domain)
TRINITY_DN14072_c0_g1		1.6067	0.21	0.45	0.2467	0.16	0.2667	2.4967	1.5667	patatin-like protein 2 [Glycine soja] >KHN04516.1 Patatin group A-3 [Glycine soja] >RZC14868.1 Patatin-like protein 2 [Glycine soja]	COG3621(Patatin group)	sp|O48723|PLP2_ARATH(Patatin-like protein 2 OS=Arabidopsis thaliana OX=3702 GN=PLP2 PE=1 SV=1)	PF01734(Patatin:Patatin-like phospholipase)
TRINITY_DN14076_c0_g1		0.2033	1.1767	2.2633	2.1867	1.0633	2.1433	1.09	1.4033	PREDICTED: protein PLASTID MOVEMENT IMPAIRED 2-like [Lupinus angustifolius]	ENOG410Y9R7(Pfam:DUF827)	sp|Q9C9N6|PMI2_ARATH(Protein PLASTID MOVEMENT IMPAIRED 2 OS=Arabidopsis thaliana OX=3702 GN=PMI2 PE=1 SV=1)	PF05701(WEMBL:Weak chloroplast movement under blue light)
TRINITY_DN14077_c0_g2		0.12	0.7733	1.0533	0.6367	0.23	0.8533	0.4333	0.5067	PREDICTED: uncharacterized protein LOC109351521 isoform X1 [Lupinus angustifolius] >XP_019448526.1 PREDICTED: uncharacterized protein LOC109351521 isoform X1 [Lupinus angustifolius]	ENOG410Y2WM(Ternary complex factor MIP1)		PF04784(DUF547:Protein of unknown function, DUF547); PF14389(Lzipper-MIP1:Leucine-zipper of ternary complex factor MIP1)
TRINITY_DN14080_c0_g2		2.1267	0.5267	2.01	1.18	1.1033	4.7733	0.5267	3.5433	hypothetical protein E2542_SST15539 [Spatholobus suberectus]
TRINITY_DN14085_c0_g1		0.1967	0.3767	1.1867	0.2867	0.52	0.4333	0.3833	0.6	PREDICTED: uncharacterized protein LOC109360630 [Lupinus angustifolius] >OIW17953.1 hypothetical protein TanjilG_17789 [Lupinus angustifolius]	ENOG410YB2T(-)	sp|F4KGE8|GIL1_ARATH(Protein GRAVITROPIC IN THE LIGHT 1 OS=Arabidopsis thaliana OX=3702 GN=GIL1 PE=2 SV=1)	PF04859(DUF641:Plant protein of unknown function (DUF641))
TRINITY_DN14085_c0_g2		0.1033	0.7867	1.0733	1	0.19	1.5267	0.4967	0.6667	PREDICTED: uncharacterized protein LOC109361754 [Lupinus angustifolius] >OIW00520.1 hypothetical protein TanjilG_24250 [Lupinus angustifolius]	ENOG410YB2T(Plant protein of unknown function (DUF641))	sp|F4KGE8|GIL1_ARATH(Protein GRAVITROPIC IN THE LIGHT 1 OS=Arabidopsis thaliana OX=3702 GN=GIL1 PE=2 SV=1)	PF04859(DUF641:Plant protein of unknown function (DUF641))
TRINITY_DN14092_c0_g1		34.2267	56.1	61.3567	40.0967	16.6833	1.1467	88.6833	86.6767	PREDICTED: phosphoenolpyruvate carboxylase, housekeeping isozyme [Lupinus angustifolius] >OIV99116.1 hypothetical protein TanjilG_22696 [Lupinus angustifolius]	COG2352(phosphoenolpyruvate carboxylase activity)	sp|Q02909|CAPP1_SOYBN(Phosphoenolpyruvate carboxylase, housekeeping isozyme OS=Glycine max OX=3847 GN=PPC16 PE=2 SV=1)	PF00311(PEPcase:Phosphoenolpyruvate carboxylase)
TRINITY_DN1409_c6_g1		172.537	64.8667	17.0367	64.5767	89.8033	51.4133	164.217	71.4067	hypothetical protein DVH24_034431 [Malus domestica]	COG5023(protein polymerization)	sp|Q9FT36|TBA_DAUCA(Tubulin alpha chain OS=Daucus carota OX=4039 GN=TBA PE=2 SV=1)	PF00091(Tubulin:Tubulin/FtsZ family, GTPase domain)
TRINITY_DN14104_c0_g1		0.6267	0.02	0.04	0.21	0.1467	0.0567	0.14	0.02
TRINITY_DN14104_c0_g2		0.65	0.2767	0.04	0.33	0.2433	0.0967	0.26	0.21	hypothetical protein TanjilG_20292 [Lupinus angustifolius]	COG5347(domain, ankyrin repeat and PH domain)	sp|Q9FIT8|AGD1_ARATH(ADP-ribosylation factor GTPase-activating protein AGD1 OS=Arabidopsis thaliana OX=3702 GN=AGD1 PE=2 SV=2)	PF01412(ArfGap:Putative GTPase activating protein for Arf); PF13857(Ank_5:Ankyrin repeats (many copies)); PF00023(Ank:Ankyrin repeat); PF13637(Ank_4:Ankyrin repeats (many copies)); PF12796(Ank_2:Ankyrin repeats (3 copies)); PF13606(Ank_3:Ankyrin repeat)
TRINITY_DN14123_c0_g1		0	0.5233	0.5067	0.0933	0.1533	0	20.1667	3.7867	uncharacterized protein LOC112998750 [Glycine max] >KHN26061.1 hypothetical protein glysoja_025159 [Glycine soja] >KRH18846.1 hypothetical protein GLYMA_13G085900 [Glycine max]
TRINITY_DN14130_c0_g1		1.75	1.3567	4.6133	1.98	0.1533	7.4067	2.2767	6.9333
TRINITY_DN14135_c0_g1		1.5233	4.3867	6.36	4.6867	2.78	6.4367	2.63	5.3433	PREDICTED: nuclear transcription factor Y subunit A-7-like [Lupinus angustifolius] >OIW18741.1 hypothetical protein TanjilG_13493 [Lupinus angustifolius]	COG5224(Nuclear transcription factor Y)	sp|Q93ZH2|NFYA3_ARATH(Nuclear transcription factor Y subunit A-3 OS=Arabidopsis thaliana OX=3702 GN=NFYA3 PE=2 SV=2)	PF02045(CBFB_NFYA:CCAAT-binding transcription factor (CBF-B/NF-YA) subunit B)
TRINITY_DN14136_c0_g1		0.6467	4.2367	12.03	1.59	3.1533	0.1967	1.16	10.8767	hypothetical protein TanjilG_01526 [Lupinus angustifolius]	COG1472(Protein of unknown function (DUF640))	sp|A7LXU3|BGH3B_BACO1(Beta-glucosidase BoGH3B OS=Bacteroides ovatus (strain ATCC 8483 / DSM 1896 / JCM 5824 / NCTC 11153) OX=411476 GN=BACOVA_02659 PE=1 SV=1)	PF00933(Glyco_hydro_3:Glycosyl hydrolase family 3 N terminal domain)
TRINITY_DN14138_c0_g1		34.4267	10.84	3.08	28.7233	17.2067	22.54	17.9567	32.4467	PREDICTED: heavy metal-associated isoprenylated plant protein 39-like [Lupinus angustifolius] >OIW08060.1 hypothetical protein TanjilG_20161 [Lupinus angustifolius]	COG2608(heavy metal transport detoxification protein); ENOG4111AW0(Heavy-metal-associated domain)	sp|Q9LTE3|HIP12_ARATH(Heavy metal-associated isoprenylated plant protein 12 OS=Arabidopsis thaliana OX=3702 GN=HIPP12 PE=3 SV=1)	PF00403(HMA:Heavy-metal-associated domain)
TRINITY_DN14138_c1_g1		7.7167	0.65	0.1067	1.2967	1.1433	0.5967	12.7567	1.32	PREDICTED: late embryogenesis abundant protein 47-like isoform X2 [Lupinus angustifolius]	ENOG4111RXD(late embryogenesis abundant protein)	sp|P09444|LEA34_GOSHI(Late embryogenesis abundant protein D-34 OS=Gossypium hirsutum OX=3635 PE=3 SV=1)	PF04927(SMP:Seed maturation protein)
TRINITY_DN14144_c0_g1		10.0367	11.5633	65.5533	21.9667	6.8067	21.9033	12.9233	20.63	PREDICTED: uncharacterized protein At5g48480 [Lupinus angustifolius] >OIW21863.1 hypothetical protein TanjilG_13732 [Lupinus angustifolius]	ENOG410YUXH(-)	sp|Q9LV66|Y5848_ARATH(Uncharacterized protein At5g48480 OS=Arabidopsis thaliana OX=3702 GN=At5g48480 PE=1 SV=1)	PF18029(Glyoxalase_6:Glyoxalase-like domain)
TRINITY_DN14144_c0_g2		4.54	7.0267	28.27	13.3733	4.76	8.2533	6.41	5.6967	PREDICTED: uncharacterized protein At5g48480 [Lupinus angustifolius] >OIW21863.1 hypothetical protein TanjilG_13732 [Lupinus angustifolius]	ENOG410YUXH(-)
TRINITY_DN14147_c0_g2		4.3533	1.89	0.42	0.1	3.7133	0.8567	1.4633	3.3867	hypothetical protein D0Y65_035487 [Glycine soja] >RZB70542.1 hypothetical protein D0Y65_035489 [Glycine soja]	ENOG4111JHC(senescence-associated protein)
TRINITY_DN14156_c0_g1		14.5933	16.4	12.0767	21.5433	20.3867	12.2767	25.2167	19.41	PREDICTED: uncharacterized protein LOC109346617 [Lupinus angustifolius] >OIW12688.1 hypothetical protein TanjilG_24621 [Lupinus angustifolius]	ENOG411189H(-)
TRINITY_DN14159_c0_g2		4.2667	7.68	5.1	5.1733	3.6233	0	6.73	1.64
TRINITY_DN14176_c0_g1		0.3267	0.2667	5.2667	0.5	0.2367	0.38	0.54	0.91	hypothetical protein TanjilG_01012, partial [Lupinus angustifolius]	COG5169(Transcription factor)	sp|P22335|HSF24_SOLPE(Heat shock factor protein HSF24 OS=Solanum peruvianum OX=4082 GN=HSF24 PE=2 SV=1)	PF00447(HSF_DNA-bind:HSF-type DNA-binding)
TRINITY_DN14177_c0_g2		19.4733	7.1433	3.1367	7.1167	6.8633	2.4267	31.7133	12.5767	PREDICTED: early nodulin-16-like [Lupinus angustifolius] >OIW02800.1 hypothetical protein TanjilG_29576 [Lupinus angustifolius]	ENOG410YIBR(Plastocyanin-like domain)		PF02298(Cu_bind_like:Plastocyanin-like domain)
TRINITY_DN14198_c0_g1		154.343	111.05	20.4633	97.7033	199.323	188.037	78.18	75.93	PREDICTED: bidirectional sugar transporter SWEET1-like [Lupinus angustifolius]	ENOG4111M4R(sugar transporter)	sp|Q8L9J7|SWET1_ARATH(Bidirectional sugar transporter SWEET1 OS=Arabidopsis thaliana OX=3702 GN=SWEET1 PE=1 SV=1)	PF03083(MtN3_slv:Sugar efflux transporter for intercellular exchange)
TRINITY_DN14198_c0_g2		137.02	111.82	17.2467	102.563	160.75	149.58	74.3967	63.9367	Bidirectional sugar transporter SWEET1 isoform B [Glycine soja]	ENOG4111M4R(sugar transporter)
TRINITY_DN1419_c0_g1		5.92	40.4067	72.41	32.3867	23.26	38.27	22.73	29.8567	PREDICTED: xyloglucan endotransglucosylase/hydrolase protein 9-like [Lupinus angustifolius] >OIW08415.1 hypothetical protein TanjilG_03091 [Lupinus angustifolius]	ENOG410YBFU(xyloglucan endotransglucosylase hydrolase protein)	sp|Q8LDW9|XTH9_ARATH(Xyloglucan endotransglucosylase/hydrolase protein 9 OS=Arabidopsis thaliana OX=3702 GN=XTH9 PE=2 SV=2)	PF00722(Glyco_hydro_16:Glycosyl hydrolases family 16); PF06955(XET_C:Xyloglucan endo-transglycosylase (XET) C-terminus)
TRINITY_DN14206_c0_g1		2.4367	0	1.1567	0.6433	1.13	4.4	0.31	0.0567
TRINITY_DN14207_c4_g1		0.1933	0.6433	0.1433	0.0833	0.1433	0	0.4267	0.2633
TRINITY_DN14219_c0_g1		0	1.0167	0	0	0	1.06	0.22	2.7767
TRINITY_DN1421_c0_g1		31.0133	4.73	0.2033	1.2733	3.5167	0.53	32.26	2.9767	PREDICTED: uncharacterized protein At4g13230-like [Lupinus angustifolius] >OIW01131.1 hypothetical protein TanjilG_25239 [Lupinus angustifolius]	ENOG410Z6WR(-)
TRINITY_DN1421_c0_g2		7	0.7867	0.02	0.6867	0.36	0.08	6.5	0.5267	PREDICTED: uncharacterized protein LOC109337018 isoform X2 [Lupinus angustifolius] >OIW17854.1 hypothetical protein TanjilG_00234 [Lupinus angustifolius]	ENOG410Z6WR(-)
TRINITY_DN14234_c0_g1		37.9667	43.3367	3.37	8.9667	9	2.7567	4.43	23.9167	hypothetical protein LR48_Vigan01g227000 [Vigna angularis] >BAT75988.1 hypothetical protein VIGAN_01393800 [Vigna angularis var. angularis]	ENOG410Z61M(-)
TRINITY_DN14239_c0_g1		8.53	1.0167	0	2.0767	2.2767	0.52	7.1667	2.0767	hypothetical protein TanjilG_01392 [Lupinus angustifolius]	ENOG411144T(reversibly glycosylated polypeptide); ENOG41121N5(Reversibly glycosylated polypeptide)	sp|Q8RU27|RGP2_SOLTU(Probable UDP-arabinopyranose mutase 2 OS=Solanum tuberosum OX=4113 GN=UPTG2 PE=1 SV=1)	PF03214(RGP:Reversibly glycosylated polypeptide)
TRINITY_DN14241_c0_g1		16.38	27.7667	56.1833	22.04	46.8533	22.7367	11.0233	19.8967	PREDICTED: probable carboxylesterase 15 [Lupinus angustifolius]	COG0657(alpha beta hydrolase fold-3 domain protein)	sp|Q9FG13|CXE15_ARATH(Probable carboxylesterase 15 OS=Arabidopsis thaliana OX=3702 GN=CXE15 PE=2 SV=1)	PF07859(Abhydrolase_3:alpha/beta hydrolase fold); PF00135(COesterase:Carboxylesterase family); PF12740(Chlorophyllase2:Chlorophyllase enzyme)
TRINITY_DN14248_c0_g1		4.5967	1.3	0.1167	1.61	1.51	0.8033	3.1433	1.9867	hypothetical protein TanjilG_02440 [Lupinus angustifolius]	ENOG410Z2H1(-)
TRINITY_DN14253_c0_g1		2.61	0.7567	0.0633	0.8367	0.91	0.2733	2.9467	0.3433	PREDICTED: uncharacterized protein LOC109336446 [Lupinus angustifolius]	ENOG410YHFB(-)
TRINITY_DN14256_c0_g1		0.4867	0.2333	1.1	0.1633	0.8967	0.1067	1.6567	2.6767	PREDICTED: UDP-glycosyltransferase 73C1-like [Lupinus angustifolius] >OIW05131.1 hypothetical protein TanjilG_02604 [Lupinus angustifolius]	COG1819(Transferase)	sp|Q9ZQ94|U73C5_ARATH(UDP-glycosyltransferase 73C5 OS=Arabidopsis thaliana OX=3702 GN=UGT73C5 PE=2 SV=1)	PF00201(UDPGT:UDP-glucoronosyl and UDP-glucosyl transferase)
TRINITY_DN14266_c0_g1		0.43	0.7933	2.0033	0.8833	0.7033	2.67	1.2233	1.3133	PREDICTED: AT-hook motif nuclear-localized protein 28-like [Lupinus angustifolius] >OIW02544.1 hypothetical protein TanjilG_12858 [Lupinus angustifolius]	ENOG410YGVK(Domain of unknown function (DUF296))	sp|Q9LTA2|AHL17_ARATH(AT-hook motif nuclear-localized protein 17 OS=Arabidopsis thaliana OX=3702 GN=AHL17 PE=2 SV=1)	PF03479(DUF296:Plants and Prokaryotes Conserved (PCC) domain)
TRINITY_DN14267_c0_g1		0.32	0.8	3.71	1.86	0.7633	1.32	4.1833	2.4167	PREDICTED: uncharacterized protein LOC109346345 [Lupinus angustifolius] >OIW12934.1 hypothetical protein TanjilG_15854 [Lupinus angustifolius]	ENOG411167R(-)
TRINITY_DN14276_c0_g1		28.12	7.8367	3.7033	12.87	15.9233	49.7333	1.7433	13.95	PREDICTED: heterogeneous nuclear ribonucleoprotein 1-like [Lupinus angustifolius] >XP_019425875.1 PREDICTED: heterogeneous nuclear ribonucleoprotein 1-like [Lupinus angustifolius] >OIV91849.1 hypothetical protein TanjilG_17841 [Lupinus angustifolius]	ENOG410YA8Z(Rna-binding protein)
TRINITY_DN14286_c0_g1		2.77	0.5967	0.0667	0.95	0.44	0.85	2.98	0.4533	PREDICTED: uncharacterized protein LOC109357343 isoform X1 [Lupinus angustifolius]	ENOG41114IE(-)		PF14283(DUF4366:Domain of unknown function (DUF4366))
TRINITY_DN14290_c0_g1		125.493	22.1567	5.99	51.3533	59.6533	32.8967	109.52	15.9733	PREDICTED: pectinesterase-like [Lupinus angustifolius] >OIW13017.1 hypothetical protein TanjilG_15466 [Lupinus angustifolius]	COG4677(pectinesterase)	sp|O04887|PME2_CITSI(Pectinesterase 2 OS=Citrus sinensis OX=2711 GN=PECS-2.1 PE=2 SV=1)	PF01095(Pectinesterase:Pectinesterase)
TRINITY_DN14298_c0_g1		123.22	32.6567	6.5833	45.0433	67	32.6667	100.403	22.52	PREDICTED: S-adenosylmethionine decarboxylase proenzyme-like [Lupinus angustifolius] >OIW06553.1 hypothetical protein TanjilG_29974 [Lupinus angustifolius]	ENOG410XRN0(pectinesterase)	sp|Q96471|DCAM_IPONI(S-adenosylmethionine decarboxylase proenzyme OS=Ipomoea nil OX=35883 GN=SAMDC PE=3 SV=1)	PF01536(SAM_decarbox:Adenosylmethionine decarboxylase)
TRINITY_DN1429_c0_g1		5.0133	8.3267	22.7333	10.8867	12.89	24.6533	14.73	27.2933	PREDICTED: legumain [Lupinus angustifolius] >OIW09836.1 hypothetical protein TanjilG_20543 [Lupinus angustifolius]	COG5206(phosphatidylinositol glycan anchor biosynthesis, class K)	sp|P49045|VPE_SOYBN(Vacuolar-processing enzyme OS=Glycine max OX=3847 PE=2 SV=1)	PF01650(Peptidase_C13:Peptidase C13 family); PF00656(Peptidase_C14:Caspase domain)
TRINITY_DN14306_c0_g4		6.24	1.6833	0.8433	68.6167	16.7767	61.7233	2.1233	48.9767	PREDICTED: long chain acyl-CoA synthetase 8 [Lupinus angustifolius] >XP_019461470.1 PREDICTED: long chain acyl-CoA synthetase 8 [Lupinus angustifolius] >OIW01939.1 hypothetical protein TanjilG_25095 [Lupinus angustifolius]
TRINITY_DN14306_c0_g5		26.2133	41.71	21.2133	1.41	27.39	19.41	10.75	15.5867	PREDICTED: long chain acyl-CoA synthetase 8 [Lupinus angustifolius] >XP_019461470.1 PREDICTED: long chain acyl-CoA synthetase 8 [Lupinus angustifolius] >OIW01939.1 hypothetical protein TanjilG_25095 [Lupinus angustifolius]
TRINITY_DN14307_c0_g2		33.4567	11.97	6.41	12.8767	14.7867	8.9567	16.0567	7.92	PREDICTED: protein FLOURY 1-like [Lupinus angustifolius] >OIW10478.1 hypothetical protein TanjilG_00416 [Lupinus angustifolius]
TRINITY_DN14324_c0_g2		0.5867	2.0033	2.6267	2.87	1.0233	1.5733	12.4233	7.6667	PREDICTED: LRR receptor-like serine/threonine-protein kinase ERL1 [Lupinus angustifolius] >OIW06766.1 hypothetical protein TanjilG_11491 [Lupinus angustifolius]	COG4886(leucine Rich Repeat)		PF13855(LRR_8:Leucine rich repeat); PF12799(LRR_4:Leucine Rich repeats (2 copies)); PF08263(LRRNT_2:Leucine rich repeat N-terminal domain)
TRINITY_DN14333_c0_g1		0.29	9.4	4.5967	0.7167	0.5767	1.1933	1.23	7.45	PREDICTED: trihelix transcription factor GT-2 [Lupinus angustifolius] >OIV96053.1 hypothetical protein TanjilG_27157 [Lupinus angustifolius]	ENOG410YYXY(Transcription factor)	sp|Q39117|TGT2_ARATH(Trihelix transcription factor GT-2 OS=Arabidopsis thaliana OX=3702 GN=GT-2 PE=2 SV=1)	PF13837(Myb_DNA-bind_4:Myb/SANT-like DNA-binding domain); PF10545(MADF_DNA_bdg:Alcohol dehydrogenase transcription factor Myb/SANT-like)
TRINITY_DN14334_c0_g1		9.46	4.32	15.2633	9.4633	9.8967	0	7.1	16.78	PREDICTED: DEAD-box ATP-dependent RNA helicase 8 isoform X3 [Lupinus angustifolius]	ENOG410XRAZ(atp-dependent rna helicase)	sp|Q8RXK6|RH8_ARATH(DEAD-box ATP-dependent RNA helicase 8 OS=Arabidopsis thaliana OX=3702 GN=RH8 PE=2 SV=1)
TRINITY_DN14339_c0_g2		0	0.1267	2.1133	0.7767	0.7433	5.3433	2.2533	1.05	PREDICTED: splicing regulatory glutamine/lysine-rich protein 1 isoform X3 [Lupinus angustifolius]	ENOG410XWT0(-)
TRINITY_DN14341_c0_g1		3.16	0.8967	0.7133	1.4433	0.6267	0.9567	2.09	0.8133	PREDICTED: probable methyltransferase PMT27 isoform X2 [Lupinus angustifolius]	ENOG410Y2C5(Methyltransferase)	sp|Q9SD39|PMTR_ARATH(Probable methyltransferase PMT27 OS=Arabidopsis thaliana OX=3702 GN=At3g51070 PE=3 SV=1)	PF03141(Methyltransf_29:Putative S-adenosyl-L-methionine-dependent methyltransferase); PF08241(Methyltransf_11:Methyltransferase domain); PF13649(Methyltransf_25:Methyltransferase domain); PF13489(Methyltransf_23:Methyltransferase domain)
TRINITY_DN14342_c0_g1		0.2767	2.2367	7.5267	0.4833	2.1267	0	0.94	0	PREDICTED: dnaJ homolog subfamily B member 4-like [Lupinus angustifolius] >OIW13700.1 hypothetical protein TanjilG_08042 [Lupinus angustifolius]	COG0484(ATP binding to DnaK triggers the release of the substrate protein, thus completing the reaction cycle. Several rounds of ATP-dependent interactions between DnaJ, DnaK and GrpE are required for fully efficient folding. Also involved, together with DnaK and GrpE, in the DNA replication of plasmids through activation of initiation proteins (By similarity))
TRINITY_DN14350_c0_g1		8.7433	3.95	3.6833	1.7433	0	9.2967	4.23	4.9333
TRINITY_DN14357_c0_g1		0.3933	1.68	3.27	1.6833	1.55	2.61	4.8133	6.4167	PREDICTED: probable purine permease 10 isoform X1 [Lupinus angustifolius] >OIV90060.1 hypothetical protein TanjilG_21192 [Lupinus angustifolius]	ENOG4111D9S(purine permease)	sp|O49726|PUP21_ARATH(Purine permease 21 OS=Arabidopsis thaliana OX=3702 GN=PUP21 PE=2 SV=2)	PF16913(PUNUT:Purine nucleobase transmembrane transport); PF00892(EamA:EamA-like transporter family); PF04142(Nuc_sug_transp:Nucleotide-sugar transporter)
TRINITY_DN14360_c0_g3		0.5967	0.1233	0	0.0833	0.1333	0.04	0.7	0.0767	hypothetical protein TanjilG_10887 [Lupinus angustifolius]	COG0475(Sodium hydrogen exchanger)	sp|Q1HDT2|CHX24_ARATH(Cation/H(+) antiporter 24 OS=Arabidopsis thaliana OX=3702 GN=CHX24 PE=2 SV=2)	PF00999(Na_H_Exchanger:Sodium/hydrogen exchanger family)
TRINITY_DN14364_c1_g1		0.28	1.0733	0.3233	0.4867	0.8567	0.0267	0.4	3.8733	uncharacterized protein LOC110009312 [Jatropha curcas]	COG2801(Retrotransposon protein)	sp|P03554|POL_CAMVS(Enzymatic polyprotein OS=Cauliflower mosaic virus (strain Strasbourg) OX=10648 GN=ORF V PE=3 SV=1)	PF00078(RVT_1:Reverse transcriptase (RNA-dependent DNA polymerase)); PF17919(RT_RNaseH_2:RNase H-like domain found in reverse transcriptase); PF17917(RT_RNaseH:RNase H-like domain found in reverse transcriptase)
TRINITY_DN14364_c1_g2		0.0167	1.4767	0.2267	0.0167	0	0.0067	0.13	0.09	PREDICTED: uncharacterized protein LOC105949756 [Erythranthe guttata]	COG2801(Retrotransposon protein); ENOG410YF14(zinc knuckle family protein)	sp|Q91DM0|POLG_PVCV1(Genome polyprotein OS=Petunia vein clearing virus (isolate Shepherd) OX=492094 PE=3 SV=1)
TRINITY_DN14364_c1_g3		0	2.3533	0.03	0.9067	0.0533	0.3733	1.62	0.0867
TRINITY_DN14371_c0_g1		4.56	1.2433	0.01	0	0.7567	0.3033	5.0867	0
TRINITY_DN14372_c0_g1		7.78	0.14	0	0	5.51	0.1533	6.8567	0
TRINITY_DN14372_c0_g2		13.89	1.7367	0.2667	1.84	4.47	2.3933	17.2567	1.9267
TRINITY_DN14372_c0_g3		16.6167	2.5533	0.14	3.5033	3.1633	1.3633	22.7367	2.5133	hypothetical protein TanjilG_17922 [Lupinus angustifolius] >OIW13744.1 hypothetical protein TanjilG_17923 [Lupinus angustifolius] >OIW13745.1 hypothetical protein TanjilG_17924 [Lupinus angustifolius]
TRINITY_DN14372_c1_g1		3.3967	0.4233	0	0	0	0	0.32	0.7
TRINITY_DN14373_c0_g1		5.0333	1.8433	1.1767	2.0167	3.1333	1.7567	5.0033	1.33
TRINITY_DN14377_c0_g1		0.9233	1.9067	0.9033	2.3133	0.5467	1.76	4.7567	5.2433	PREDICTED: protein NRT1/ PTR FAMILY 4.6-like [Lupinus angustifolius] >OIW17460.1 hypothetical protein TanjilG_22572 [Lupinus angustifolius]	COG3104(transporter)	sp|Q8H157|PTR19_ARATH(Protein NRT1/ PTR FAMILY 4.6 OS=Arabidopsis thaliana OX=3702 GN=NPF4.6 PE=1 SV=1)	PF00854(PTR2:POT family)
TRINITY_DN14385_c0_g1		2.3533	0.9333	1.9667	0.3933	0.02	1.1833	0.1367	0.0867	PREDICTED: serine/threonine-protein kinase STY46-like isoform X5 [Lupinus angustifolius]	COG0515(Serine Threonine protein kinase)	sp|F4JTP5|STY46_ARATH(Serine/threonine-protein kinase STY46 OS=Arabidopsis thaliana OX=3702 GN=STY46 PE=1 SV=1)	PF00069(Pkinase:Protein kinase domain); PF07714(Pkinase_Tyr:Protein tyrosine kinase); PF17667(Pkinase_fungal:Fungal protein kinase); PF12330(Haspin_kinase:Haspin like kinase domain); PF14531(Kinase-like:Kinase-like)
TRINITY_DN14392_c0_g2		0	0.3367	2.5733	0.3433	0	2.4033	0.42	3	PREDICTED: protein RSI-1-like [Lupinus angustifolius] >XP_019460298.1 PREDICTED: protein RSI-1-like [Lupinus angustifolius] >OIW02665.1 hypothetical protein TanjilG_29441 [Lupinus angustifolius] >OIW02666.1 hypothetical protein TanjilG_29442 [Lupinus angustifolius]	ENOG41116UK(Gibberellin regulated protein)	sp|P47926|RSI1_SOLLC(Protein RSI-1 OS=Solanum lycopersicum OX=4081 GN=RSI-1 PE=2 SV=1)	PF02704(GASA:Gibberellin regulated protein)
TRINITY_DN14394_c0_g1		8.1267	1.2533	0.4833	1.3767	1.0667	0.6667	10.5433	2.01	PREDICTED: uncharacterized protein At2g34160-like [Lupinus angustifolius] >OIW13813.1 hypothetical protein TanjilG_31702 [Lupinus angustifolius]	ENOG4111815(nucleic acid binding)	sp|O22969|Y2416_ARATH(Uncharacterized protein At2g34160 OS=Arabidopsis thaliana OX=3702 GN=At2g34160 PE=1 SV=1)	PF01918(Alba:Alba)
TRINITY_DN14404_c0_g1		1.3833	0.1467	1.27	0.4467	0.1033	3.7867	0.9167	0.2133	hypothetical protein TSUD_300020 [Trifolium subterraneum]	ENOG4111T8J(transposon protein); ENOG410XSI7(zinc finger BED domain-containing protein)	sp|P08770|TRA1_MAIZE(Putative AC transposase OS=Zea mays OX=4577 PE=2 SV=2)	PF14372(DUF4413:Domain of unknown function (DUF4413)); PF05699(Dimer_Tnp_hAT:hAT family C-terminal dimerisation region); PF02892(zf-BED:BED zinc finger)
TRINITY_DN14405_c0_g1		1.13	0.52	0	0.2367	0.4233	0.0833	0.9167	0.24	PREDICTED: auxin response factor 17-like [Lupinus angustifolius] >XP_019438564.1 PREDICTED: auxin response factor 17-like [Lupinus angustifolius] >OIW14515.1 hypothetical protein TanjilG_04948 [Lupinus angustifolius]	ENOG410ZJKK(auxin response factor)	sp|Q9SKN5|ARFJ_ARATH(Auxin response factor 10 OS=Arabidopsis thaliana OX=3702 GN=ARF10 PE=2 SV=1)
TRINITY_DN14408_c0_g1		15.0133	19.6367	11.8467	15.0067	12.69	8.8667	54.4233	10.0733	PREDICTED: linoleate 9S-lipoxygenase-like [Lupinus angustifolius] >XP_019443472.1 PREDICTED: linoleate 9S-lipoxygenase-like [Lupinus angustifolius] >OIW11864.1 hypothetical protein TanjilG_31614 [Lupinus angustifolius] >OIW17114.1 hypothetical protein TanjilG_26769 [Lupinus angustifolius]	ENOG410YN4N(Plant lipoxygenase may be involved in a number of diverse aspects of plant physiology including growth and development, pest resistance, and senescence or responses to wounding (By similarity)); ENOG410XT0Q(Plant lipoxygenase may be involved in a number of diverse aspects of plant physiology including growth and development, pest resistance, and senescence or responses to wounding (By…	sp|P09918|LOX3_PEA(Seed linoleate 9S-lipoxygenase-3 OS=Pisum sativum OX=3888 GN=LOX1.3 PE=2 SV=1)	PF00305(Lipoxygenase:Lipoxygenase)
TRINITY_DN14417_c0_g1		1.8667	0.3267	0	0.89	1.0633	0.79	2.07	0.28	PREDICTED: F-box protein At1g61340-like [Lupinus angustifolius] >OIW13863.1 hypothetical protein TanjilG_31752 [Lupinus angustifolius]
TRINITY_DN14419_c0_g1		2.49	6.1933	0	0	0	0	2.74	1.4667	uncharacterized protein LOC112033309 [Quercus suber]		sp|Q91QN9|NCAP_LBVAV(Nucleoprotein OS=Lettuce big-vein associated virus (isolate Japan/Kagawa) OX=652962 GN=N PE=3 SV=1)	PF03216(Rhabdo_ncap_2:Rhabdovirus nucleoprotein)
TRINITY_DN14422_c1_g1		1.5767	0.9433	1.4	0.7033	0.8667	0.5433	1.3167	1.7367	Retrovirus-related Pol polyprotein LINE-1, partial [Cajanus cajan]	ENOG410YUPY(Retroelement); ENOG410ZMPU(Reverse transcriptase (RNA-dependent DNA polymerase)); ENOG410Y65V(Retrotransposon protein)
TRINITY_DN14424_c0_g1		40.27	10.1667	1.5067	16.2167	19.1333	8.6	19.39	7.0933	PREDICTED: pollen receptor-like kinase 3 [Lupinus angustifolius] >OIW21734.1 hypothetical protein TanjilG_09071 [Lupinus angustifolius]	COG0515(Serine Threonine protein kinase)	sp|Q9M1L7|PRK3_ARATH(Pollen receptor-like kinase 3 OS=Arabidopsis thaliana OX=3702 GN=PRK3 PE=1 SV=1)	PF07714(Pkinase_Tyr:Protein tyrosine kinase); PF00069(Pkinase:Protein kinase domain); PF08263(LRRNT_2:Leucine rich repeat N-terminal domain); PF12799(LRR_4:Leucine Rich repeats (2 copies)); PF13855(LRR_8:Leucine rich repeat)
TRINITY_DN14432_c0_g2		373.093	691.38	515.66	519.373	15.79	30.7433	423.757	19.3633	PREDICTED: probable carotenoid cleavage dioxygenase 4, chloroplastic [Lupinus angustifolius] >OIV92912.1 hypothetical protein TanjilG_00089 [Lupinus angustifolius]	COG3670(Glioma tumor suppressor candidate region gene 2)	sp|O49675|CCD4_ARATH(Probable carotenoid cleavage dioxygenase 4, chloroplastic OS=Arabidopsis thaliana OX=3702 GN=CCD4 PE=1 SV=1)	PF03055(RPE65:Retinal pigment epithelial membrane protein)
TRINITY_DN14436_c0_g2		1.0133	0.8233	2.37	1.31	2.4133	1.6433	4.4333	1.6267	PREDICTED: GABA transporter 1 isoform X1 [Lupinus angustifolius] >OIW08520.1 hypothetical protein TanjilG_03196 [Lupinus angustifolius]	COG0814(Catalyzes the interconversion of 2-phosphoglycerate and 3-phosphoglycerate (By similarity))	sp|F4HW02|GAT1_ARATH(GABA transporter 1 OS=Arabidopsis thaliana OX=3702 GN=GAT1 PE=1 SV=1)	PF01490(Aa_trans:Transmembrane amino acid transporter protein)
TRINITY_DN14444_c0_g1		0	1.5533	5.31	0.82	0.18	0.3667	0.81	0.0933	PREDICTED: organic cation/carnitine transporter 4-like isoform X1 [Lupinus angustifolius]	ENOG410XSRI(solute carrier family 22); COG0477(solute carrier family 22)	sp|Q9LHQ6|OCT4_ARATH(Organic cation/carnitine transporter 4 OS=Arabidopsis thaliana OX=3702 GN=OCT4 PE=2 SV=1)	PF00083(Sugar_tr:Sugar (and other) transporter)
TRINITY_DN14449_c0_g1		196.58	57.33	14.6767	17.3733	132.96	13.94	92.4267	42.96	PREDICTED: L-ascorbate oxidase homolog [Lupinus angustifolius] >OIV93344.1 hypothetical protein TanjilG_23280 [Lupinus angustifolius]	COG2132(Multicopper oxidase)	sp|P29162|ASOL_TOBAC(L-ascorbate oxidase homolog OS=Nicotiana tabacum OX=4097 PE=2 SV=1)
TRINITY_DN14453_c0_g1		38.6067	60.8433	186.173	78.5767	62.0833	138.777	46.0367	67.26	PREDICTED: uncharacterized protein LOC109344169 [Lupinus angustifolius] >OIW14625.1 hypothetical protein TanjilG_32967 [Lupinus angustifolius]	ENOG410Z5YI(-)		PF15761(IMUP:Immortalisation up-regulated protein)
TRINITY_DN14455_c0_g2		0.6367	1.6533	3.6833	1.8533	1.0633	1.5367	2.1767	1.5833	PREDICTED: endoglucanase 24-like [Lupinus angustifolius] >OIW08737.1 hypothetical protein TanjilG_03413 [Lupinus angustifolius]	ENOG410YC2H(endo-glucanase)	sp|Q93YQ7|GUN24_ARATH(Endoglucanase 24 OS=Arabidopsis thaliana OX=3702 GN=At4g39010 PE=2 SV=1)	PF00759(Glyco_hydro_9:Glycosyl hydrolase family 9)
TRINITY_DN14458_c0_g1		1.34	0.5833	0.0633	0.7667	0.6867	0.27	2.16	0.69	PREDICTED: agamous-like MADS-box protein AGL65 isoform X1 [Lupinus angustifolius]	COG5068(Transcription factor)	sp|Q7X9I0|AGL65_ARATH(Agamous-like MADS-box protein AGL65 OS=Arabidopsis thaliana OX=3702 GN=AGL65 PE=1 SV=1)	PF00319(SRF-TF:SRF-type transcription factor (DNA-binding and dimerisation domain))
TRINITY_DN14458_c0_g2		3.58	0.7567	0.1867	0.94	1.4433	0.4367	3.04	0.5867	PREDICTED: agamous-like MADS-box protein AGL65 isoform X4 [Lupinus angustifolius]	COG5068(Transcription factor)	sp|Q7X9I0|AGL65_ARATH(Agamous-like MADS-box protein AGL65 OS=Arabidopsis thaliana OX=3702 GN=AGL65 PE=1 SV=1)	PF00319(SRF-TF:SRF-type transcription factor (DNA-binding and dimerisation domain))
TRINITY_DN14465_c0_g1		2.77	2.8333	5.78	0.96	4.2533	1.3233	44.7433	16.4667	PREDICTED: endogenous alpha-amylase/subtilisin inhibitor-like [Lupinus angustifolius] >XP_019453539.1 PREDICTED: endogenous alpha-amylase/subtilisin inhibitor-like [Lupinus angustifolius] >XP_019453540.1 PREDICTED: endogenous alpha-amylase/subtilisin inhibitor-like [Lupinus angustifolius] >XP_019453541.1 PREDICTED: endogenous alpha-amylase/subtilisin inhibitor-like [Lupinus angustifolius] >XP_019…	ENOG410YHN1(trypsin and protease inhibitor family protein Kunitz family protein); ENOG4111AS0(STI)	sp|P29421|IAAS_ORYSJ(Alpha-amylase/subtilisin inhibitor OS=Oryza sativa subsp. japonica OX=39947 GN=RASI PE=1 SV=2)	PF00197(Kunitz_legume:Trypsin and protease inhibitor)
TRINITY_DN14469_c0_g1		0.22	2.19	0.7033	2.9933	2.4367	13.0667	1.7633	1.7433
TRINITY_DN14471_c0_g1		1.17	1.4367	1.72	1.1533	2.7433	1.2933	0.4267	1.0133	PREDICTED: uncharacterized protein LOC109346259 [Lupinus angustifolius]	ENOG41123NR(-)		PF04750(Far-17a_AIG1:FAR-17a/AIG1-like protein)
TRINITY_DN14475_c0_g1		0.1167	1.91	1.7033	4.02	0.27	0.4567	2.96	1.2867	PREDICTED: importin beta-like SAD2 isoform X2 [Lupinus angustifolius] >OIW17291.1 hypothetical protein TanjilG_22403 [Lupinus angustifolius]	COG5656(Importin)	sp|F4IRR2|SAD2_ARATH(Importin beta-like SAD2 OS=Arabidopsis thaliana OX=3702 GN=SAD2 PE=1 SV=1)	PF03810(IBN_N:Importin-beta N-terminal domain)
TRINITY_DN14488_c0_g1		0	6.0567	2.3367	16.2467	17.2033	15.5767	4.1433	4.96	PREDICTED: probable sucrose-phosphate synthase [Lupinus angustifolius] >OIW18596.1 hypothetical protein TanjilG_13348 [Lupinus angustifolius]	COG0438(Glycosyl transferase (Group 1)	sp|Q43876|SPSA_VICFA(Probable sucrose-phosphate synthase OS=Vicia faba OX=3906 GN=SPS PE=2 SV=1)
TRINITY_DN144_c1_g1		1.8167	1.0067	13.7933	1.0833	0.8367	1.81	1.4667	2.92	PREDICTED: ethylene-responsive transcription factor RAP2-13-like [Lupinus angustifolius] >OIW16590.1 hypothetical protein TanjilG_02796 [Lupinus angustifolius]	ENOG410YGN6(Transcription factor)	sp|Q8H1E4|RAP24_ARATH(Ethylene-responsive transcription factor RAP2-4 OS=Arabidopsis thaliana OX=3702 GN=RAP2-4 PE=1 SV=1)	PF00847(AP2:AP2 domain)
TRINITY_DN14501_c1_g1		1.9333	2.93	1.1667	5.89	6.5567	2.6333	5.22	0.81	hypothetical protein MTR_2g064200 [Medicago truncatula]
TRINITY_DN14505_c0_g1		0.2667	1.52	4	1.2533	0.9267	1.9233	2.05	1.3233
TRINITY_DN14532_c0_g1		10.9667	53.8267	51.5167	135.843	27.3267	38.13	25.0633	48.1333	PREDICTED: (-	COG1028(Dehydrogenase reductase)	sp|Q5C9I9|ISPD_MENPI((-)-isopiperitenol/(-)-carveol dehydrogenase, mitochondrial OS=Mentha piperita OX=34256 PE=1 SV=1)	PF13561(adh_short_C2:Enoyl-(Acyl carrier protein) reductase); PF00106(adh_short:short chain dehydrogenase); PF08659(KR:KR domain); PF01370(Epimerase:NAD dependent epimerase/dehydratase family); PF13460(NAD_binding_10:NAD(P)H-binding); PF03435(Sacchrp_dh_NADP:Saccharopine dehydrogenase NADP binding domain); PF16363(GDP_Man_Dehyd:GDP-mannose 4,6 dehydratase); PF01073(3Beta_HSD:3-beta hydroxysteroid…
TRINITY_DN14549_c0_g1		29.17	14.2067	9.91	10.4067	30.5167	22.6533	16.5133	3.04	hypothetical protein E2542_SST04466 [Spatholobus suberectus]
TRINITY_DN14550_c0_g2		0.6033	2.5567	2.8333	1.7233	1.9	4.73	0.6333	1.6267	hypothetical protein TanjilG_02524 [Lupinus angustifolius]	ENOG410YXA2(Auxin-induced protein)	sp|Q9ZUZ3|SAU32_ARATH(Auxin-responsive protein SAUR32 OS=Arabidopsis thaliana OX=3702 GN=SAUR32 PE=2 SV=1)	PF02519(Auxin_inducible:Auxin responsive protein)
TRINITY_DN14555_c0_g1		1.35	6.9867	0.6633	4.26	1.2467	0	3.9133	2.8633	hypothetical protein TanjilG_03976 [Lupinus angustifolius]	ENOG410Z0ES(Domain of unknown function (DUF3511))		PF12023(DUF3511:Domain of unknown function (DUF3511))
TRINITY_DN14566_c1_g1		27.4733	11.48	10.1867	17.5667	36.15	16.4233	11.8933	13.88	PREDICTED: heavy metal-associated isoprenylated plant protein 6-like [Lupinus angustifolius] >OIV92367.1 hypothetical protein TanjilG_09965 [Lupinus angustifolius]	COG2608(heavy metal transport detoxification protein)	sp|Q9SJL2|HIP5_ARATH(Heavy metal-associated isoprenylated plant protein 5 OS=Arabidopsis thaliana OX=3702 GN=HIPP05 PE=1 SV=2)	PF00403(HMA:Heavy-metal-associated domain)
TRINITY_DN14575_c0_g1		23.45	21.9567	6.5967	21.6467	28.2633	23.7933	11.99	15.63
TRINITY_DN14578_c0_g1		9.26	3.03	1.9067	2.6933	2.6633	1.5867	8.0633	3.2233	PREDICTED: uncharacterized protein LOC109354874 [Lupinus angustifolius] >OIW18616.1 hypothetical protein TanjilG_13368 [Lupinus angustifolius]	ENOG4111ECQ(smr domain containing protein)
TRINITY_DN14583_c0_g1		3.8533	0.8633	2.7867	2.1	0.0767	12.2467	2.4367	6.59	PREDICTED: uncharacterized protein LOC109334287 isoform X2 [Lupinus angustifolius] >OIV91530.1 hypothetical protein TanjilG_08942 [Lupinus angustifolius]	ENOG410ZDEH(t-complex 11)
TRINITY_DN14588_c0_g1		252.11	665.433	69.07	240.957	364.487	131.787	424.39	571.847	PREDICTED: GDSL esterase/lipase At2g38180-like isoform X3 [Lupinus angustifolius] >OIV98586.1 hypothetical protein TanjilG_12172 [Lupinus angustifolius]	COG2755(lipolytic protein G-D-S-L family)	sp|O80443|GDL46_ARATH(GDSL esterase/lipase At2g38180 OS=Arabidopsis thaliana OX=3702 GN=At2g38180 PE=2 SV=1)	PF13472(Lipase_GDSL_2:GDSL-like Lipase/Acylhydrolase family); PF00657(Lipase_GDSL:GDSL-like Lipase/Acylhydrolase)
TRINITY_DN14588_c0_g2		13.6033	16.2233	20.38	68.2467	9.8667	7.2067	22.0067	20.8033	PREDICTED: GDSL esterase/lipase At2g38180-like isoform X7 [Lupinus angustifolius]	COG2755(lipolytic protein G-D-S-L family)	sp|O80443|GDL46_ARATH(GDSL esterase/lipase At2g38180 OS=Arabidopsis thaliana OX=3702 GN=At2g38180 PE=2 SV=1)	PF13472(Lipase_GDSL_2:GDSL-like Lipase/Acylhydrolase family); PF00657(Lipase_GDSL:GDSL-like Lipase/Acylhydrolase)
TRINITY_DN14588_c1_g1		1.34	0.4733	0.5567	2.6467	1.4533	0.1533	0.6433	0.96	hypothetical protein CR513_41585, partial [Mucuna pruriens]	ENOG410Z7Z7(transmembrane 9 superfamily member)
TRINITY_DN14591_c0_g1		1.49	0.4933	0.4633	0	0	0	0	0
TRINITY_DN14605_c0_g1		102.04	40.54	5.53	43.9033	57.8533	28.9567	94.8533	22.98	PREDICTED: putative SNAP25 homologous protein SNAP30 [Lupinus angustifolius] >XP_019463147.1 PREDICTED: putative SNAP25 homologous protein SNAP30 [Lupinus angustifolius] >XP_019463148.1 PREDICTED: putative SNAP25 homologous protein SNAP30 [Lupinus angustifolius] >OIW00494.1 hypothetical protein TanjilG_27607 [Lupinus angustifolius]	ENOG410Y3Y0(Synaptosomal-associated protein)	sp|Q9S7P9|SNP33_ARATH(SNAP25 homologous protein SNAP33 OS=Arabidopsis thaliana OX=3702 GN=SNAP33 PE=1 SV=1)	PF12352(V-SNARE_C:Snare region anchored in the vesicle membrane C-terminus); PF17002(DUF5089:Domain of unknown function (DUF5089))
TRINITY_DN14607_c0_g1		0.66	1.0867	2.74	19.24	0.6167	0	32.58	0.9667	PREDICTED: probable disease resistance protein At4g27220 isoform X3 [Lupinus angustifolius]	COG4886(leucine Rich Repeat)
TRINITY_DN14607_c0_g2		0.23	0.2	0.91	1.19	0	29.04	0.98	39.2833
TRINITY_DN1460_c0_g2		0.7	3.5233	3.8767	3.5733	3.46	3.8767	2.3867	1.89	PREDICTED: monocopper oxidase-like protein SKS1 [Lupinus angustifolius]	COG2132(Multicopper oxidase)	sp|Q8VXX5|SKS1_ARATH(Monocopper oxidase-like protein SKS1 OS=Arabidopsis thaliana OX=3702 GN=SKS1 PE=2 SV=1)	PF00394(Cu-oxidase:Multicopper oxidase); PF07732(Cu-oxidase_3:Multicopper oxidase); PF07731(Cu-oxidase_2:Multicopper oxidase)
TRINITY_DN14625_c0_g1		27.72	9.1167	1.8433	9.3633	13.58	6.7133	19.45	6.3533	PREDICTED: uncharacterized protein LOC109346140 [Lupinus angustifolius] >OIW13127.1 hypothetical protein TanjilG_32108 [Lupinus angustifolius]	ENOG410YQG1(C2 domain-containing protein)		PF00168(C2:C2 domain)
TRINITY_DN14633_c0_g1		89.6967	18.2733	2.1933	13.8367	25.7133	15.03	86.6133	9.3333	PREDICTED: soluble inorganic pyrophosphatase 1-like [Lupinus angustifolius]	COG0221(Vpr (HIV-1) binding protein)	sp|O82793|IPYR3_ARATH(Soluble inorganic pyrophosphatase 3 OS=Arabidopsis thaliana OX=3702 GN=PPA3 PE=2 SV=1)	PF00719(Pyrophosphatase:Inorganic pyrophosphatase)
TRINITY_DN14635_c0_g1		2.4933	8.34	15.11	9.8933	4.6967	12.1267	6.62	7.4333	PREDICTED: beta-galactosidase 3-like [Lupinus angustifolius] >OIV94818.1 hypothetical protein TanjilG_22015 [Lupinus angustifolius]	COG1874(beta-galactosidase)	sp|Q9SCV9|BGAL3_ARATH(Beta-galactosidase 3 OS=Arabidopsis thaliana OX=3702 GN=BGAL3 PE=2 SV=1)	PF01301(Glyco_hydro_35:Glycosyl hydrolases family 35); PF17834(GHD:Beta-sandwich domain in beta galactosidase); PF02449(Glyco_hydro_42:Beta-galactosidase)
TRINITY_DN14635_c0_g2		7.3467	4.63	7.9733	8.5133	4.3233	3.4833	21.8733	5.2467	PREDICTED: beta-galactosidase 3-like [Lupinus angustifolius]	COG1874(beta-galactosidase)	sp|Q9SCV9|BGAL3_ARATH(Beta-galactosidase 3 OS=Arabidopsis thaliana OX=3702 GN=BGAL3 PE=2 SV=1)	PF01301(Glyco_hydro_35:Glycosyl hydrolases family 35); PF17834(GHD:Beta-sandwich domain in beta galactosidase); PF02140(Gal_Lectin:Galactose binding lectin domain); PF02449(Glyco_hydro_42:Beta-galactosidase)
TRINITY_DN14636_c0_g1		0	8.9867	10.0333	7.5033	0.7333	0	1.6533	7.4433	hypothetical protein TanjilG_28304 [Lupinus angustifolius]	ENOG410YFS5(WRKY)
TRINITY_DN1464_c0_g2		0	3.8133	1.34	0.1767	2.2367	0	2.4667	0	protein SPIRAL1-like 1 [Arachis duranensis] >XP_020998383.1 protein SPIRAL1-like 1 [Arachis duranensis] >XP_025700191.1 protein SPIRAL1-like 1 [Arachis hypogaea] >XP_025700192.1 protein SPIRAL1-like 1 [Arachis hypogaea] >RYR58555.1 hypothetical protein Ahy_A05g024381 [Arachis hypogaea]	ENOG410XXM3(-)	sp|Q9S7P8|SP1L3_ARATH(Protein SPIRAL1-like 3 OS=Arabidopsis thaliana OX=3702 GN=SP1L3 PE=1 SV=1)
TRINITY_DN14651_c0_g1		1.7333	0.7867	0.1667	0.68	0.88	0.4633	1.2133	0.3533	PREDICTED: uncharacterized protein At4g38062-like [Lupinus angustifolius] >OIW10617.1 hypothetical protein TanjilG_15989 [Lupinus angustifolius]	ENOG410YG0K(-)	sp|P0CB23|Y4862_ARATH(Uncharacterized protein At4g38062 OS=Arabidopsis thaliana OX=3702 GN=At4g38062 PE=4 SV=1)
TRINITY_DN14658_c0_g1		1.69	0.7133	2.56	1.42	1.47	0.2833	1.5567	1.74	PREDICTED: F-box protein PP2-A13-like [Lupinus angustifolius] >OIW20443.1 hypothetical protein TanjilG_11142 [Lupinus angustifolius]	ENOG410Y934(RNA binding motif protein)	sp|Q9LEX0|P2A13_ARATH(F-box protein PP2-A13 OS=Arabidopsis thaliana OX=3702 GN=PP2A13 PE=1 SV=1)	PF14299(PP2:Phloem protein 2)
TRINITY_DN14664_c0_g1		1.0333	0.2933	1.7833	1.47	0.8933	2.2433	1.1267	0.5167	PREDICTED: auxin-responsive protein SAUR32 [Lupinus angustifolius] >OIV95060.1 hypothetical protein TanjilG_10880 [Lupinus angustifolius]	ENOG410YXA2(Auxin-induced protein)	sp|Q9ZUZ3|SAU32_ARATH(Auxin-responsive protein SAUR32 OS=Arabidopsis thaliana OX=3702 GN=SAUR32 PE=2 SV=1)	PF02519(Auxin_inducible:Auxin responsive protein)
TRINITY_DN14666_c1_g1		1.8967	1.3467	0.2933	1.3433	1.03	1.35	2.1933	1.3133	Retrovirus-related Pol polyprotein from transposon TNT 1-94 [Cajanus cajan]	ENOG410XS4D(Retrotransposon protein); COG2801(Retrotransposon protein)	sp|P10978|POLX_TOBAC(Retrovirus-related Pol polyprotein from transposon TNT 1-94 OS=Nicotiana tabacum OX=4097 PE=2 SV=1)	PF07727(RVT_2:Reverse transcriptase (RNA-dependent DNA polymerase)); PF00665(rve:Integrase core domain); PF13976(gag_pre-integrs:GAG-pre-integrase domain); PF00098(zf-CCHC:Zinc knuckle); PF13683(rve_3:Integrase core domain)
TRINITY_DN14673_c0_g1		0.5733	3.36	4.6067	3.22	2.25	1.6767	2.4933	1.31	hypothetical protein TSUD_405850 [Trifolium subterraneum]	COG2801(Retrotransposon protein)	sp|Q99315|YG31B_YEAST(Transposon Ty3-G Gag-Pol polyprotein OS=Saccharomyces cerevisiae (strain ATCC 204508 / S288c) OX=559292 GN=TY3B-G PE=1 SV=3)	PF00078(RVT_1:Reverse transcriptase (RNA-dependent DNA polymerase)); PF17919(RT_RNaseH_2:RNase H-like domain found in reverse transcriptase); PF17917(RT_RNaseH:RNase H-like domain found in reverse transcriptase); PF17921(Integrase_H2C2:Integrase zinc binding domain); PF03732(Retrotrans_gag:Retrotransposon gag protein); PF00665(rve:Integrase core domain); PF13975(gag-asp_proteas:gag-polyprotein pu…
TRINITY_DN14673_c2_g1		0.6067	1.35	1.3333	0.5767	0.95	0.1533	0.4733	1.1033	hypothetical protein TSUD_112140, partial [Trifolium subterraneum]		sp|Q99315|YG31B_YEAST(Transposon Ty3-G Gag-Pol polyprotein OS=Saccharomyces cerevisiae (strain ATCC 204508 / S288c) OX=559292 GN=TY3B-G PE=1 SV=3)	PF00078(RVT_1:Reverse transcriptase (RNA-dependent DNA polymerase)); PF13975(gag-asp_proteas:gag-polyprotein putative aspartyl protease); PF13650(Asp_protease_2:Aspartyl protease); PF08284(RVP_2:Retroviral aspartyl protease)
TRINITY_DN14684_c0_g1		0.26	1.5433	2.53	1.2567	0.7067	1.5233	0.9733	1.3833	PREDICTED: nucleobase-ascorbate transporter 1 [Lupinus angustifolius]	COG2233(B3 domain-containing protein)	sp|Q9SHZ3|NAT1_ARATH(Nucleobase-ascorbate transporter 1 OS=Arabidopsis thaliana OX=3702 GN=NAT1 PE=2 SV=1)	PF00860(Xan_ur_permease:Permease family)
TRINITY_DN14699_c0_g1		6.4833	4.8733	6.69	13.7933	4.54	7.9867	0	8.2667
TRINITY_DN14704_c0_g1		18.4333	31.67	34.36	24.6767	46.7733	45.4067	54.9267	100.15	PREDICTED: ATP synthase subunit beta, mitochondrial [Lupinus angustifolius] >OIV91088.1 hypothetical protein TanjilG_30310 [Lupinus angustifolius]	COG0055(Produces ATP from ADP in the presence of a proton gradient across the membrane. The catalytic sites are hosted primarily by the beta subunits (By similarity))	sp|P29685|ATPBM_HEVBR(ATP synthase subunit beta, mitochondrial OS=Hevea brasiliensis OX=3981 GN=ATPB PE=2 SV=1)	PF11421(Synthase_beta:ATP synthase F1 beta subunit); PF02874(ATP-synt_ab_N:ATP synthase alpha/beta family, beta-barrel domain)
TRINITY_DN14706_c0_g1		42.3033	16.22	4.2367	16.1867	23.8867	13.1433	29.26	10.9933	PREDICTED: uncharacterized protein LOC109358794 isoform X2 [Lupinus angustifolius] >OIW03683.1 hypothetical protein TanjilG_30747 [Lupinus angustifolius]	COG0464(Aaa atpase)	sp|Q9Z2F6|BCL3_MOUSE(B-cell lymphoma 3 protein homolog OS=Mus musculus OX=10090 GN=Bcl3 PE=1 SV=2)	PF12796(Ank_2:Ankyrin repeats (3 copies)); PF13857(Ank_5:Ankyrin repeats (many copies)); PF00023(Ank:Ankyrin repeat); PF13637(Ank_4:Ankyrin repeats (many copies)); PF13606(Ank_3:Ankyrin repeat)
TRINITY_DN14724_c0_g1		0.9733	0.4033	2.5767	0.8467	0.91	0.5133	1.7633	8.85	PREDICTED: uncharacterized protein LOC109342618 [Lupinus angustifolius] >OIW15061.1 hypothetical protein TanjilG_13988 [Lupinus angustifolius]	ENOG410ZHN4(-)
TRINITY_DN14727_c0_g1		1.1767	1.06	3.0533	3.8733	0.9167	0.2633	1.8467	1.06
TRINITY_DN14729_c0_g2		1.46	0.3833	0.5467	0.29	0.04	2.5467	0.9633	0.0267	hypothetical protein TanjilG_03068 [Lupinus angustifolius]	ENOG410YTTN(-)
TRINITY_DN14735_c0_g1		343.173	104.9	18.7767	122.9	169.1	86.11	254.64	60.3	PREDICTED: pectinesterase-like isoform X1 [Lupinus angustifolius]	COG4677(pectinesterase)	sp|Q9SMY6|PME45_ARATH(Putative pectinesterase/pectinesterase inhibitor 45 OS=Arabidopsis thaliana OX=3702 GN=PME45 PE=2 SV=1)	PF01095(Pectinesterase:Pectinesterase); PF04043(PMEI:Plant invertase/pectin methylesterase inhibitor)
TRINITY_DN14742_c0_g2		5.0233	26.74	30.3167	22.7467	9.49	17.9367	26.73	19.15	PREDICTED: stress-response A/B barrel domain-containing protein At5g22580 [Lupinus angustifolius] >OIW09045.1 hypothetical protein TanjilG_16272 [Lupinus angustifolius]	ENOG410YNSU(Dabb)	sp|Q9FK81|Y5258_ARATH(Stress-response A/B barrel domain-containing protein At5g22580 OS=Arabidopsis thaliana OX=3702 GN=At5g22580 PE=1 SV=1)	PF07876(Dabb:Stress responsive A/B Barrel Domain)
TRINITY_DN14743_c0_g1		36.0367	17.9567	8.3167	46.1567	0.4467	0	15.11	27.36	PREDICTED: 60S ribosomal protein L3-1-like [Lupinus angustifolius] >OIV91424.1 hypothetical protein TanjilG_02042 [Lupinus angustifolius]	COG0087(One of the primary rRNA binding proteins, it binds directly near the 3'-end of the 23S rRNA, where it nucleates assembly of the 50S subunit (By similarity))	sp|P22738|RL32_ARATH(60S ribosomal protein L3-2 OS=Arabidopsis thaliana OX=3702 GN=ARP2 PE=2 SV=4)	PF00297(Ribosomal_L3:Ribosomal protein L3)
TRINITY_DN14743_c1_g1		30.9567	58.9767	18.58	31.0767	8.0633	0	34.17	15.1567	PREDICTED: 60S ribosomal protein L3-1 [Lupinus angustifolius] >XP_019452749.1 PREDICTED: 60S ribosomal protein L3-1 [Lupinus angustifolius] >OIW06585.1 hypothetical protein TanjilG_03979 [Lupinus angustifolius]	COG0087(One of the primary rRNA binding proteins, it binds directly near the 3'-end of the 23S rRNA, where it nucleates assembly of the 50S subunit (By similarity))	sp|P35684|RL3_ORYSJ(60S ribosomal protein L3 OS=Oryza sativa subsp. japonica OX=39947 GN=RPL3 PE=2 SV=2)	PF00297(Ribosomal_L3:Ribosomal protein L3)
TRINITY_DN14746_c0_g3		7.16	1.28	0.99	1.19	0.82	0.3333	1.43	5.53	PREDICTED: malate synthase, glyoxysomal [Lupinus angustifolius] >OIW00279.1 hypothetical protein TanjilG_27530 [Lupinus angustifolius]	COG2225(malate synthase)	sp|P45458|MASY_SOYBN(Malate synthase, glyoxysomal (Fragment) OS=Glycine max OX=3847 PE=2 SV=1)	PF01274(Malate_synthase:Malate synthase); PF03328(HpcH_HpaI:HpcH/HpaI aldolase/citrate lyase family)
TRINITY_DN14747_c0_g1		33.5933	3.5033	1.6467	6.1133	2.8667	3.03	2.5	9.9867	PREDICTED: probable indole-3-pyruvate monooxygenase YUCCA10 [Lupinus angustifolius] >OIW13349.1 hypothetical protein TanjilG_02869 [Lupinus angustifolius]	COG2072(Monooxygenase)	sp|Q9FVQ0|YUC10_ARATH(Probable indole-3-pyruvate monooxygenase YUCCA10 OS=Arabidopsis thaliana OX=3702 GN=YUC10 PE=2 SV=1)	PF13738(Pyr_redox_3:Pyridine nucleotide-disulphide oxidoreductase); PF00743(FMO-like:Flavin-binding monooxygenase-like); PF13434(K_oxygenase:L-lysine 6-monooxygenase (NADPH-requiring)); PF07992(Pyr_redox_2:Pyridine nucleotide-disulphide oxidoreductase); PF00070(Pyr_redox:Pyridine nucleotide-disulphide oxidoreductase); PF01494(FAD_binding_3:FAD binding domain); PF01946(Thi4:Thi4 family)
TRINITY_DN14751_c0_g1		10.46	15.98	11.6667	27.9667	11.2467	4.0367	18.83	18.02
TRINITY_DN14757_c0_g1		0.39	6.88	8.7167	10.21	3.29	4.7167	5.4933	5.4167	PREDICTED: GDSL esterase/lipase EXL1-like [Lupinus angustifolius]	COG3240(GDSL esterase lipase)	sp|Q94CH8|EXL1_ARATH(GDSL esterase/lipase EXL1 OS=Arabidopsis thaliana OX=3702 GN=EXL1 PE=2 SV=1)	PF00657(Lipase_GDSL:GDSL-like Lipase/Acylhydrolase)
TRINITY_DN14757_c1_g1		12.27	8.3033	4.12	5.4267	7.3067	3.0267	5.1667	8.7233	PREDICTED: GDSL esterase/lipase EXL1-like [Lupinus angustifolius]	COG3240(GDSL esterase lipase)	sp|Q94CH6|EXL3_ARATH(GDSL esterase/lipase EXL3 OS=Arabidopsis thaliana OX=3702 GN=EXL3 PE=2 SV=1)	PF00657(Lipase_GDSL:GDSL-like Lipase/Acylhydrolase)
TRINITY_DN14768_c0_g1		6.3233	6.44	7.9867	17.52	0.2967	0.8067	3.83	0.25
TRINITY_DN14770_c0_g3		50.13	41.8667	18.31	9.3267	28.6	21.4567	33.05	28.05	PREDICTED: vacuolar cation/proton exchanger 3-like [Lupinus angustifolius] >OIW07454.1 hypothetical protein TanjilG_24316 [Lupinus angustifolius]	COG0387(Calcium Proton)	sp|Q93Z81|CAX3_ARATH(Vacuolar cation/proton exchanger 3 OS=Arabidopsis thaliana OX=3702 GN=CAX3 PE=1 SV=1)	PF01699(Na_Ca_ex:Sodium/calcium exchanger protein)
TRINITY_DN14773_c0_g1		3.5333	1.3067	0.26	1.4033	2.5967	1.15	3.1533	0.7333	PREDICTED: cation/H(+	COG0475(Sodium hydrogen exchanger)	sp|Q9FFB8|CHX3_ARATH(Cation/H(+) antiporter 3 OS=Arabidopsis thaliana OX=3702 GN=CHX3 PE=2 SV=1)	PF00999(Na_H_Exchanger:Sodium/hydrogen exchanger family)
TRINITY_DN14776_c0_g1		0.3167	42.3833	0.0533	0	114.247	14.4667	39.7833	71.3967	PREDICTED: mannose/glucose-specific lectin-like [Lupinus angustifolius] >OIW09292.1 hypothetical protein TanjilG_01263 [Lupinus angustifolius]		sp|Q39529|LEC2_CLAKE(Agglutinin-2 OS=Cladrastis kentukea OX=38412 PE=1 SV=1)	PF00139(Lectin_legB:Legume lectin domain); PF18483(Bact_lectin:Bacterial lectin)
TRINITY_DN1477_c0_g1		4.3767	0.8933	0.17	1.1233	1.57	0.8867	5.05	0.7633	PREDICTED: peroxidase 65-like [Lupinus angustifolius] >OIW07778.1 hypothetical protein TanjilG_03565 [Lupinus angustifolius]	ENOG410YA7M(peroxidase)	sp|O23609|PER41_ARATH(Peroxidase 41 OS=Arabidopsis thaliana OX=3702 GN=PER41 PE=3 SV=1)	PF00141(peroxidase:Peroxidase)
TRINITY_DN14780_c0_g1		8.95	20.2767	34.7633	14.53	16.6267	24.6433	17.23	37.2	persulfide dioxygenase ETHE1 homolog, mitochondrial isoform X2 [Arachis duranensis] >XP_025610729.1 persulfide dioxygenase ETHE1 homolog, mitochondrial isoform X2 [Arachis hypogaea]	COG0491(Beta-lactamase domain protein)	sp|Q9C8L4|ETHE1_ARATH(Persulfide dioxygenase ETHE1 homolog, mitochondrial OS=Arabidopsis thaliana OX=3702 GN=GLY3 PE=1 SV=3)
TRINITY_DN14785_c0_g4		0	0	0.5333	0.1133	0.1433	0.9867	0	0.1533	hypothetical protein Ahy_B01g051399 isoform A [Arachis hypogaea]	ENOG410XNZC(oligo-peptide transporter)	sp|O82485|OPT7_ARATH(Oligopeptide transporter 7 OS=Arabidopsis thaliana OX=3702 GN=OPT7 PE=2 SV=1)
TRINITY_DN14785_c0_g5		0.7533	0.82	0.18	0.31	0	0	1.45	0.52
TRINITY_DN14795_c1_g1		0.6167	1.05	0	1.02	0.88	1.5333	0.0067	0	hypothetical protein TanjilG_14198 [Lupinus angustifolius]	COG0557(3'-5' exoribonuclease that releases 5'-nucleoside monophosphates and is involved in maturation of structured RNAs (By similarity))	sp|Q6NQJ6|RNR1_ARATH(Ribonuclease II, chloroplastic/mitochondrial OS=Arabidopsis thaliana OX=3702 GN=RNR1 PE=2 SV=1)
TRINITY_DN14817_c0_g1		14.76	16.27	73.3367	0.2867	64.27	59.2667	0.13	63.4	Hsp70-Hsp90 organizing protein 3 [Zea mays]	ENOG410XTCJ(tetratricopeptide repeat domain)	sp|Q5XEP2|HSOP2_ARATH(Hsp70-Hsp90 organizing protein 2 OS=Arabidopsis thaliana OX=3702 GN=HOP2 PE=1 SV=1)	PF00515(TPR_1:Tetratricopeptide repeat); PF07719(TPR_2:Tetratricopeptide repeat); PF13414(TPR_11:TPR repeat); PF13432(TPR_16:Tetratricopeptide repeat)
TRINITY_DN14824_c0_g1		1.2167	0.5867	0.2533	1.4933	0.26	0.0833	2.5267	1.0333	PREDICTED: 1-aminocyclopropane-1-carboxylate oxidase homolog 1-like [Lupinus angustifolius] >OIW01284.1 hypothetical protein TanjilG_10445 [Lupinus angustifolius]	COG3491(2OGFe(II) oxygenase)	sp|Q84MB3|ACCH1_ARATH(1-aminocyclopropane-1-carboxylate oxidase homolog 1 OS=Arabidopsis thaliana OX=3702 GN=At1g06620 PE=2 SV=1)	PF03171(2OG-FeII_Oxy:2OG-Fe(II) oxygenase superfamily); PF14226(DIOX_N:non-haem dioxygenase in morphine synthesis N-terminal)
TRINITY_DN14825_c0_g1		0.0333	1.3267	1.75	0.6267	0.53	0.9267	0.7933	0.94	PREDICTED: uncharacterized protein LOC109333778 [Lupinus angustifolius] >OIV91770.1 hypothetical protein TanjilG_26623 [Lupinus angustifolius]	ENOG410ZFU3(-)
TRINITY_DN14827_c0_g1		0.7	1.02	6.8433	2.3133	0.7167	3.07	1.6667	1.02	PREDICTED: ethylene-responsive transcription factor 4-like [Lupinus angustifolius] >OIW06092.1 hypothetical protein TanjilG_29848 [Lupinus angustifolius]	ENOG410YQ8J(Transcription factor)	sp|O80340|ERF78_ARATH(Ethylene-responsive transcription factor 4 OS=Arabidopsis thaliana OX=3702 GN=ERF4 PE=1 SV=1)	PF00847(AP2:AP2 domain)
TRINITY_DN14828_c0_g1		1.6833	2.8267	3.2233	3.08	1.2867	2.23	5.3667	2.9267	PREDICTED: trihelix transcription factor GTL2-like isoform X2 [Lupinus angustifolius]	ENOG410YYXY(Transcription factor)	sp|Q8H181|GTL2_ARATH(Trihelix transcription factor GTL2 OS=Arabidopsis thaliana OX=3702 GN=At5g28300 PE=2 SV=1)	PF13837(Myb_DNA-bind_4:Myb/SANT-like DNA-binding domain); PF10545(MADF_DNA_bdg:Alcohol dehydrogenase transcription factor Myb/SANT-like)
TRINITY_DN1483_c0_g3		0	0.6133	9.32	4.95	1.12	0	0.6133	2.1733	PREDICTED: LOW QUALITY PROTEIN: G-type lectin S-receptor-like serine/threonine-protein kinase At1g67520 [Lupinus angustifolius]	COG0515(Serine Threonine protein kinase)	sp|Q9LDT0|CRK30_ARATH(Putative cysteine-rich receptor-like protein kinase 30 OS=Arabidopsis thaliana OX=3702 GN=CRK30 PE=3 SV=1)
TRINITY_DN14849_c0_g1		3.1233	1.2267	0.9	2.65	1.81	1.76	2.53	1.1767	PREDICTED: probable F-box protein At1g60180 [Lupinus angustifolius] >OIW21394.1 hypothetical protein TanjilG_02561 [Lupinus angustifolius]	ENOG410YK80(F-box protein)	sp|Q9XIN8|FB119_ARATH(F-box protein At2g27310 OS=Arabidopsis thaliana OX=3702 GN=At2g27310 PE=2 SV=1)	PF12937(F-box-like:F-box-like)
TRINITY_DN14859_c0_g1		14.0967	29.2667	18.64	20.4167	0	0	13.04	42.47	PREDICTED: protein BTR1-like [Lupinus angustifolius] >OIV90598.1 hypothetical protein TanjilG_01679 [Lupinus angustifolius]	ENOG410XRZD(Neuro-oncological ventral antigen); ENOG410XQ8E(KH domain)	sp|Q9LZ82|BTR1_ARATH(Protein BTR1 OS=Arabidopsis thaliana OX=3702 GN=BTR1 PE=1 SV=1)	PF00013(KH_1:KH domain); PF07650(KH_2:KH domain); PF13083(KH_4:KH domain)
TRINITY_DN14861_c0_g1		0.5867	1.5233	9.9	2.4533	1.1333	5.11	2.2067	1.4433	PREDICTED: uncharacterized protein LOC109356085 [Lupinus angustifolius]	ENOG410YX6S(Plant protein 1589 of unknown function (A_thal_3526))		PF09713(A_thal_3526:Plant protein 1589 of unknown function (A_thal_3526))
TRINITY_DN14866_c0_g1		0.4167	0.8433	6.5233	0.33	0.17	0.8967	3.3067	5.09	PREDICTED: transcription factor bHLH3 isoform X2 [Lupinus angustifolius] >XP_019456242.1 PREDICTED: transcription factor bHLH3 isoform X2 [Lupinus angustifolius] >OIW05032.1 hypothetical protein TanjilG_18631 [Lupinus angustifolius]	ENOG41114N5(Transcription factor)	sp|O23487|BH003_ARATH(Transcription factor bHLH3 OS=Arabidopsis thaliana OX=3702 GN=BHLH3 PE=1 SV=1)	PF00010(HLH:Helix-loop-helix DNA-binding domain)
TRINITY_DN14867_c0_g1		0.0633	4.82	0.14	0.0967	4.67	0.1067	0.51	0.1	hypothetical protein TanjilG_00176 [Lupinus angustifolius]	ENOG410YAVA(IQ-domain)	sp|Q8L4D8|IQD31_ARATH(Protein IQ-DOMAIN 31 OS=Arabidopsis thaliana OX=3702 GN=IQD31 PE=1 SV=1)	PF13178(DUF4005:Protein of unknown function (DUF4005)); PF00612(IQ:IQ calmodulin-binding motif)
TRINITY_DN14868_c0_g3		1.49	1.42	2.24	1.29	0.0567	1.92	2.0533	1.4133	hypothetical protein TanjilG_14470 [Lupinus angustifolius]	ENOG41129UG(Protein of unknown function (DUF674)); ENOG410YEB9(Protein of unknown function (DUF674))		PF05056(DUF674:Protein of unknown function (DUF674))
TRINITY_DN14875_c0_g1		3.1333	1.88	1.12	0.59	1.55	2.21	3.1433	2.89	PREDICTED: probable inactive poly [ADP-ribose] polymerase SRO2 isoform X2 [Lupinus angustifolius]	ENOG4111KQX(RCD1-SRO-TAF4 (RST) plant domain)	sp|Q9FJJ3|SRO5_ARATH(Probable inactive poly [ADP-ribose] polymerase SRO5 OS=Arabidopsis thaliana OX=3702 GN=SRO5 PE=1 SV=1)	PF12174(RST:RCD1-SRO-TAF4 (RST) plant domain)
TRINITY_DN14884_c0_g1		0.2767	0.7233	2.06	0.93	0.8867	1.1067	1.0333	1.7033	PREDICTED: phosphate transporter PHO1 homolog 3 isoform X3 [Lupinus angustifolius]	COG5409(Xenotropic and polytropic retrovirus receptor 1)	sp|Q6R8G7|PHO13_ARATH(Phosphate transporter PHO1 homolog 3 OS=Arabidopsis thaliana OX=3702 GN=PHO1;H3 PE=2 SV=2)	PF03105(SPX:SPX domain); PF03124(EXS:EXS family)
TRINITY_DN1488_c0_g1		7.88	1.8767	0.6333	2.3567	2.5833	1.18	7.3	1.9467	PREDICTED: U-box domain-containing protein 35-like isoform X1 [Lupinus angustifolius]	COG0515(Serine Threonine protein kinase)	sp|Q8S8S7|PUB34_ARATH(U-box domain-containing protein 34 OS=Arabidopsis thaliana OX=3702 GN=PUB34 PE=3 SV=1)	PF00069(Pkinase:Protein kinase domain); PF07714(Pkinase_Tyr:Protein tyrosine kinase); PF00582(Usp:Universal stress protein family)
TRINITY_DN14899_c0_g1		0.3533	1.1667	1.8567	0.6933	0.4167	1.3	0.5833	0.9467	PREDICTED: F-box/LRR-repeat protein 3 [Lupinus angustifolius] >OIV95087.1 hypothetical protein TanjilG_21477 [Lupinus angustifolius]	ENOG410XQ54(F-box and leucine-rich repeat protein); ENOG410YDZS(LRR_CC)	sp|Q8RWU5|FBL3_ARATH(F-box/LRR-repeat protein 3 OS=Arabidopsis thaliana OX=3702 GN=FBL3 PE=2 SV=1)	PF13516(LRR_6:Leucine Rich repeat); PF12799(LRR_4:Leucine Rich repeats (2 copies)); PF18511(F-box_5:F-box)
TRINITY_DN14904_c0_g1		93.8467	30.23	12.7233	30.2367	48.29	26.8233	66.8467	24.7467	PREDICTED: uncharacterized protein LOC109335520 [Lupinus angustifolius] >OIW16941.1 hypothetical protein TanjilG_08524 [Lupinus angustifolius]	COG5183((Membrane-Associated Ring finger (C3HC4)))	sp|A0JN69|MARH3_BOVIN(E3 ubiquitin-protein ligase MARCH3 OS=Bos taurus OX=9913 GN=MARCH3 PE=2 SV=1)	PF12428(DUF3675:Protein of unknown function (DUF3675)); PF12906(RINGv:RING-variant domain)
TRINITY_DN14916_c0_g1		7.0633	1.4633	0	0.6533	0.19	0.53	4.2767	0.7467	PREDICTED: beta-galactosidase 13-like isoform X1 [Lupinus angustifolius] >OIV99548.1 hypothetical protein TanjilG_17358 [Lupinus angustifolius]	COG1874(beta-galactosidase)	sp|Q9SCV1|BGA11_ARATH(Beta-galactosidase 11 OS=Arabidopsis thaliana OX=3702 GN=BGAL11 PE=2 SV=1)	PF01301(Glyco_hydro_35:Glycosyl hydrolases family 35); PF02449(Glyco_hydro_42:Beta-galactosidase)
TRINITY_DN14916_c1_g1		2.16	0.1	0.04	0.1867	0.2133	0.0567	3.0633	0.5233	PREDICTED: beta-galactosidase 13-like [Lupinus angustifolius]	COG1874(beta-galactosidase)	sp|Q9SCU8|BGA14_ARATH(Beta-galactosidase 14 OS=Arabidopsis thaliana OX=3702 GN=BGAL14 PE=2 SV=2)	PF01301(Glyco_hydro_35:Glycosyl hydrolases family 35); PF02449(Glyco_hydro_42:Beta-galactosidase)
TRINITY_DN14920_c0_g2		3.24	6.5067	36.6767	8.4367	1.4367	28.5167	6.4	9.9	PREDICTED: uncharacterized protein LOC109352580 [Lupinus angustifolius]	COG2072(Monooxygenase)	sp|Q9LMA1|FMO1_ARATH(Probable flavin-containing monooxygenase 1 OS=Arabidopsis thaliana OX=3702 GN=FMO1 PE=2 SV=1)	PF00743(FMO-like:Flavin-binding monooxygenase-like); PF13738(Pyr_redox_3:Pyridine nucleotide-disulphide oxidoreductase); PF13450(NAD_binding_8:NAD(P)-binding Rossmann-like domain); PF07992(Pyr_redox_2:Pyridine nucleotide-disulphide oxidoreductase); PF13434(K_oxygenase:L-lysine 6-monooxygenase (NADPH-requiring))
TRINITY_DN14923_c0_g1		0.7233	7.97	17.8233	7.6767	5.82	0	15.4467	39.8533	PREDICTED: probable protein phosphatase 2C 24 [Lupinus angustifolius] >XP_019461258.1 PREDICTED: probable protein phosphatase 2C 24 [Lupinus angustifolius] >OIW02695.1 hypothetical protein TanjilG_29471 [Lupinus angustifolius]
TRINITY_DN14954_c0_g2		0.04	0.39	0.44	0.82	0.2067	0.06	0.3233	0.9	PREDICTED: aspartic proteinase PCS1-like [Lupinus angustifolius]	ENOG410XNV7(aspartic)	sp|Q9LZL3|PCS1L_ARATH(Aspartic proteinase PCS1 OS=Arabidopsis thaliana OX=3702 GN=PCS1 PE=2 SV=1)	PF14543(TAXi_N:Xylanase inhibitor N-terminal); PF14541(TAXi_C:Xylanase inhibitor C-terminal); PF00026(Asp:Eukaryotic aspartyl protease)
TRINITY_DN14968_c0_g1		0.42	1.23	2.85	1.2533	0.6933	1.8867	0.22	0.8967	hypothetical protein TanjilG_30575 [Lupinus angustifolius] >OIW14859.1 hypothetical protein TanjilG_30578 [Lupinus angustifolius]	COG5147(Myblike DNAbinding domain containing protein)	sp|O23160|MYB73_ARATH(Transcription factor MYB73 OS=Arabidopsis thaliana OX=3702 GN=MYB73 PE=1 SV=1)	PF00249(Myb_DNA-binding:Myb-like DNA-binding domain); PF13921(Myb_DNA-bind_6:Myb-like DNA-binding domain)
TRINITY_DN14968_c1_g1		0.1133	0.44	1.7133	1.3067	0.11	0.5367	0.5067	0.3533	PREDICTED: transcription factor MYB44-like [Lupinus angustifolius] >OIV96352.1 hypothetical protein TanjilG_09779 [Lupinus angustifolius]	COG5147(Catalyzes the decarboxylation of orotidine 5'- monophosphate (OMP) to uridine 5'-monophosphate (UMP) (By similarity))	sp|O23160|MYB73_ARATH(Transcription factor MYB73 OS=Arabidopsis thaliana OX=3702 GN=MYB73 PE=1 SV=1)	PF00249(Myb_DNA-binding:Myb-like DNA-binding domain); PF13921(Myb_DNA-bind_6:Myb-like DNA-binding domain); PF09111(SLIDE:SLIDE)
TRINITY_DN1497_c0_g1		3.3833	2.3433	0.4833	1.5467	1.0533	0.5567	6.1533	1.88	hypothetical protein TanjilG_03205 [Lupinus angustifolius]
TRINITY_DN14984_c0_g1		0.3367	0.05	0.1567	0.19	0.0367	0.1467	0.1833	1.36	PREDICTED: filament-like plant protein [Lupinus angustifolius] >XP_019460661.1 PREDICTED: filament-like plant protein [Lupinus angustifolius] >XP_019460662.1 PREDICTED: filament-like plant protein [Lupinus angustifolius] >XP_019460663.1 PREDICTED: filament-like plant protein [Lupinus angustifolius] >XP_019460664.1 PREDICTED: filament-like plant protein [Lupinus angustifolius] >OIW02444.1 hypothet…	ENOG410YAAZ(filament-like plant protein)	sp|Q8LLE5|FPP_SOLLC(Filament-like plant protein (Fragment) OS=Solanum lycopersicum OX=4081 GN=FPP PE=1 SV=1)	PF05911(FPP:Filament-like plant protein, long coiled-coil)
TRINITY_DN14985_c0_g1		0.59	3.29	4.5	1.2467	2.1467	2.0233	3.74	3.6033	hypothetical protein TanjilG_25978 [Lupinus angustifolius]	COG0154(Allows the formation of correctly charged Gln-tRNA(Gln) through the transamidation of misacylated Glu-tRNA(Gln) in organisms which lack glutaminyl-tRNA synthetase. The reaction takes place in the presence of glutamine and ATP through an activated gamma-phospho-Glu-tRNA(Gln) (By similarity))	sp|Q7XJJ7|FAAH_ARATH(Fatty acid amide hydrolase OS=Arabidopsis thaliana OX=3702 GN=FAAH PE=1 SV=1)	PF01425(Amidase:Amidase)
TRINITY_DN14990_c0_g1		2.1067	0.28	0.65	3.7667	0.3967	5.0267	4.4	0.22	PREDICTED: non-specific lipid-transfer protein A-like [Lupinus angustifolius] >OIW02829.1 hypothetical protein TanjilG_29605 [Lupinus angustifolius]
TRINITY_DN14998_c0_g1		37.7533	123.477	9.55	53.65	12.3833	1.48	8.71	25.58	PREDICTED: alcohol dehydrogenase-like 7 isoform X2 [Lupinus angustifolius] >OIW02783.1 hypothetical protein TanjilG_29559 [Lupinus angustifolius]	COG1062(alcohol dehydrogenase)	sp|Q9FH04|ADHL7_ARATH(Alcohol dehydrogenase-like 7 OS=Arabidopsis thaliana OX=3702 GN=At5g42250 PE=2 SV=1)	PF00107(ADH_zinc_N:Zinc-binding dehydrogenase)
TRINITY_DN15000_c0_g1		1.6467	0.4533	0.0267	0.2767	0.2333	0.29	4.2233	0.4133	PREDICTED: uncharacterized GPI-anchored protein At5g19250-like [Lupinus angustifolius]	ENOG4111C3W(-)	sp|P59833|UGPI3_ARATH(Uncharacterized GPI-anchored protein At5g19250 OS=Arabidopsis thaliana OX=3702 GN=At5g19250 PE=2 SV=1)
TRINITY_DN15005_c0_g1		12.4533	6.2833	2.0867	4.71	7.6067	3.5167	9.22	3.7133	PREDICTED: uncharacterized protein LOC109357383 isoform X2 [Lupinus angustifolius] >OIW05216.1 hypothetical protein TanjilG_14769 [Lupinus angustifolius]	ENOG410YJSK(EFR3 homolog)
TRINITY_DN15007_c0_g1		9.4767	2.2033	0.7933	2.6933	2.3067	0.4733	7.29	2.2467	hypothetical protein TanjilG_04499 [Lupinus angustifolius]	COG1215(Glycosyl transferase, family 2)
TRINITY_DN1500_c0_g1		0.34	2.13	2.6767	0.86	0.3833	0.16	1.38	0.7367	PREDICTED: peroxidase 10 isoform X2 [Lupinus angustifolius]
TRINITY_DN1500_c2_g1		3.2467	4.2233	13.81	12.3033	0.69	1.3733	1.81	3.5333	PREDICTED: 1,2-dihydroxy-3-keto-5-methylthiopentene dioxygenase 1 [Lupinus angustifolius] >OIV98773.1 hypothetical protein TanjilG_20519 [Lupinus angustifolius]	COG1791(Catalyzes 2 different reactions between oxygene and the acireductone 1,2-dihydroxy-3-keto-5-methylthiopentene (DHK-MTPene) depending upon the metal bound in the active site. Fe-containing acireductone dioxygenase (Fe-ARD) produces formate and 2-keto-4- methylthiobutyrate (KMTB), the alpha-ketoacid precursor of methionine in the methionine recycle pathway. Ni-containing acireductone dioxyg…	sp|D7T737|MTND1_VITVI(1,2-dihydroxy-3-keto-5-methylthiopentene dioxygenase 1 OS=Vitis vinifera OX=29760 GN=VIT_05s0020g04070 PE=3 SV=1)	PF03079(ARD:ARD/ARD' family); PF07883(Cupin_2:Cupin domain); PF02311(AraC_binding:AraC-like ligand binding domain)
TRINITY_DN15018_c0_g3		5.7767	6.24	23.43	4.0867	14.4667	30.82	12.5767	11.8133	PREDICTED: uncharacterized protein LOC109359146 [Lupinus angustifolius] >OIW02462.1 hypothetical protein TanjilG_05055 [Lupinus angustifolius]	ENOG410YRAF(Protein of unknown function (DUF1677))		PF07911(DUF1677:Protein of unknown function (DUF1677))
TRINITY_DN15030_c0_g2		109.567	32.7467	5.6567	37.8333	59.2333	27.8567	69.7667	19.0467	PREDICTED: HSP-interacting protein-like isoform X3 [Lupinus angustifolius]	ENOG410XQNT(Unc-45 homolog)	sp|F4IRM4|PHOX1_ARATH(Protein PHOX1 OS=Arabidopsis thaliana OX=3702 GN=PHOX1 PE=1 SV=1)	PF00564(PB1:PB1 domain); PF14559(TPR_19:Tetratricopeptide repeat)
TRINITY_DN15042_c0_g3		0	0.0567	0.2767	0.22	2.69	0	0.0633	0.2133
TRINITY_DN15043_c0_g1		43.6367	14.75	2.2067	18.9067	20.1767	13.9633	31.1467	9.0667	PREDICTED: annexin D5-like isoform X1 [Lupinus angustifolius]	ENOG410XPUN(annexin A7)	sp|Q9C9X3|ANXD5_ARATH(Annexin D5 OS=Arabidopsis thaliana OX=3702 GN=ANN5 PE=2 SV=2)	PF00191(Annexin:Annexin)
TRINITY_DN15049_c0_g2		11.5433	18.3233	7.2067	13.9533	16.3567	3.8667	12.1633	9.0067	PREDICTED: enhancer of polycomb homolog 2-like [Lupinus angustifolius] >XP_019453636.1 PREDICTED: enhancer of polycomb homolog 2-like [Lupinus angustifolius]	ENOG410XSSX(enhancer of polycomb homolog)
TRINITY_DN15049_c0_g3		0.6367	3.0267	0.3333	2.9767	2.6433	0.6	4.3533	0.5133
TRINITY_DN15050_c0_g2		51.54	22.2867	10.65	22.6067	29.97	18.76	37.85	13.9367	PREDICTED: dihydroceramide fatty acyl 2-hydroxylase FAH1-like isoform X1 [Lupinus angustifolius]	COG3000(fatty acid hydroxylase)	sp|O48916|FAH1_ARATH(Dihydroceramide fatty acyl 2-hydroxylase FAH1 OS=Arabidopsis thaliana OX=3702 GN=FAH1 PE=1 SV=1)	PF04116(FA_hydroxylase:Fatty acid hydroxylase superfamily)
TRINITY_DN15051_c0_g1		2.38	2.1533	4.4467	4.6	1.3267	3.9533	1.7067	15.4133	PREDICTED: uncharacterized protein LOC109329295 [Lupinus angustifolius]	ENOG4111K5V(Reverse transcriptase (RNA-dependent DNA polymerase)); ENOG410YADE(Reverse transcriptase (RNA-dependent DNA polymerase)); ENOG410Y65V(Retrotransposon protein)	sp|P08548|LIN1_NYCCO(LINE-1 reverse transcriptase homolog OS=Nycticebus coucang OX=9470 PE=4 SV=1)	PF00078(RVT_1:Reverse transcriptase (RNA-dependent DNA polymerase))
TRINITY_DN15059_c0_g2		0.1467	0.14	9.03	4.84	6.4367	0.54	3.1767	0.1333
TRINITY_DN15060_c0_g2		0.7833	2.5867	5.1133	2.99	1.45	3.14	1.62	2.3433	PREDICTED: inactive leucine-rich repeat receptor-like protein kinase CORYNE isoform X1 [Lupinus angustifolius]	COG0515(Serine Threonine protein kinase)	sp|Q9LYU7|CRN_ARATH(Inactive leucine-rich repeat receptor-like protein kinase CORYNE OS=Arabidopsis thaliana OX=3702 GN=CRN PE=1 SV=1)	PF00069(Pkinase:Protein kinase domain); PF07714(Pkinase_Tyr:Protein tyrosine kinase)
TRINITY_DN15064_c0_g2		21.0533	11.65	0	4.49	4.5867	3.2033	6.6967	2.44	hypothetical protein TanjilG_11201 [Lupinus angustifolius]	ENOG410XP06(Phosphatidylinositol 4-kinase type)	sp|Q6K881|P4KG4_ORYSJ(Phosphatidylinositol 4-kinase gamma 4 OS=Oryza sativa subsp. japonica OX=39947 GN=PI4KG4 PE=1 SV=1)
TRINITY_DN15066_c0_g1		27.5333	8.5167	2.7533	8.6067	20.2367	0.96	22.0767	21.0867	PREDICTED: acidic endochitinase-like [Lupinus angustifolius] >XP_019452774.1 PREDICTED: acidic endochitinase-like [Lupinus angustifolius] >XP_019452775.1 PREDICTED: acidic endochitinase-like [Lupinus angustifolius] >OIW06596.1 hypothetical protein TanjilG_03990 [Lupinus angustifolius]	ENOG4111GPA(chitinase)	sp|P36910|CHIE_BETVU(Acidic endochitinase SE2 OS=Beta vulgaris OX=161934 GN=SE2 PE=1 SV=1)
TRINITY_DN15071_c0_g1		97.4367	91.59	187.703	146.48	6.9933	7.88	165.417	22.1533
TRINITY_DN15075_c0_g1		9.3367	2.66	0.29	2.39	2.8233	1.9967	10.0267	1.1533	PREDICTED: protein DETOXIFICATION 34-like, partial [Lupinus angustifolius]	COG0534(histidine triad (hIT) protein); COG0534(histidine triad (hIT) protein)	sp|F4JH46|DTX34_ARATH(Protein DETOXIFICATION 34 OS=Arabidopsis thaliana OX=3702 GN=DTX34 PE=2 SV=1)	PF01554(MatE:MatE); PF14667(Polysacc_synt_C:Polysaccharide biosynthesis C-terminal domain)
TRINITY_DN15076_c0_g2		1.5233	0.9767	0.6767	0.8033	1.3933	0	0.71	0.9567
TRINITY_DN15082_c0_g1		1.9133	0.5133	0.1333	0.3867	0.36	0.15	2.2067	0.49	PREDICTED: probable protein phosphatase 2C 47 isoform X2 [Lupinus angustifolius]	COG0631(Phosphatase)	sp|Q9SD02|P2C47_ARATH(Probable protein phosphatase 2C 47 OS=Arabidopsis thaliana OX=3702 GN=At3g51470 PE=1 SV=1)	PF00481(PP2C:Protein phosphatase 2C)
TRINITY_DN15103_c0_g1		19.2367	41.6767	55.25	25.59	1.6433	11.98	16.93	8.7333	PREDICTED: AT-hook motif nuclear-localized protein 24-like [Lupinus angustifolius] >OIV92755.1 hypothetical protein TanjilG_00889 [Lupinus angustifolius]	ENOG410Y9GR(MYB family transcription factor)	sp|O22130|AHL22_ARATH(AT-hook motif nuclear-localized protein 22 OS=Arabidopsis thaliana OX=3702 GN=AHL22 PE=1 SV=1)	PF03479(DUF296:Plants and Prokaryotes Conserved (PCC) domain)
TRINITY_DN1512_c0_g3		6.3233	2.5333	1.9533	3.06	3.13	2.1633	4.3733	2.8467	PREDICTED: P-loop NTPase domain-containing protein LPA1 homolog 1-like isoform X2 [Lupinus angustifolius]	COG2074(2-Phosphoglycerate kinase)	sp|Q9FJH9|LPAH1_ARATH(P-loop NTPase domain-containing protein LPA1 homolog 1 OS=Arabidopsis thaliana OX=3702 GN=At5g60760 PE=2 SV=1)	PF13238(AAA_18:AAA domain); PF13671(AAA_33:AAA domain); PF13521(AAA_28:AAA domain)
TRINITY_DN15138_c0_g1		5.5	1.8533	0.25	1.3833	2.1733	1.2933	3.5633	0.96	PREDICTED: hypersensitive-induced response protein 4-like [Lupinus angustifolius] >OIV90709.1 hypothetical protein TanjilG_15095 [Lupinus angustifolius]	COG0330(Band 7 protein)	sp|Q9FHM7|HIR4_ARATH(Hypersensitive-induced response protein 4 OS=Arabidopsis thaliana OX=3702 GN=HIR4 PE=1 SV=1)	PF01145(Band_7:SPFH domain / Band 7 family)
TRINITY_DN1513_c1_g1		18.0967	8.2367	1.8033	7.3	12.0467	7.55	13.8033	5.45	PREDICTED: C2 and GRAM domain-containing protein At1g03370-like isoform X2 [Lupinus angustifolius]	ENOG410XS5D(Unc-13 homolog); ENOG410XRQQ(GRAM domain containing)	sp|Q9ZVT9|C2GR1_ARATH(C2 and GRAM domain-containing protein At1g03370 OS=Arabidopsis thaliana OX=3702 GN=At1g03370 PE=2 SV=4)	PF16016(VASt:VAD1 Analog of StAR-related lipid transfer domain); PF00168(C2:C2 domain); PF02893(GRAM:GRAM domain)
TRINITY_DN15144_c0_g1		3.0167	4.37	3.2167	0.49	1.9067	0	1.9533	2.4133	PREDICTED: threonine synthase 1, chloroplastic-like [Lupinus angustifolius] >OIV99742.1 hypothetical protein TanjilG_26080 [Lupinus angustifolius]	COG0498(threonine synthase)	sp|Q9MT28|THRC_SOLTU(Threonine synthase, chloroplastic OS=Solanum tuberosum OX=4113 PE=2 SV=1)
TRINITY_DN15146_c0_g1		0.13	0.7567	6.79	0.5367	0.0633	0.68	1.52	2.9067	PREDICTED: cytochrome P450 71A1-like [Lupinus angustifolius]	COG2124(Cytochrome p450)	sp|O81970|C71A9_SOYBN(Cytochrome P450 71A9 OS=Glycine max OX=3847 GN=CYP71A9 PE=2 SV=1)	PF00067(p450:Cytochrome P450)
TRINITY_DN15150_c0_g1		0.8133	0.0833	0.3333	6.7467	0.0733	4.42	2.31	0.08	autophagy-related protein 8A [Medicago truncatula] >AFK37133.1 unknown [Medicago truncatula] >KEH29692.1 gaba-receptor-associated protein ubiquitin domain protein [Medicago truncatula] >RHN60339.1 putative autophagy protein Atg8 ubiquitin [Medicago truncatula]	ENOG4111JAT(Microtubule-associated protein 1 light chain 3)	sp|M1C146|ATG8C_SOLTU(Autophagy-related protein 8C-like OS=Solanum tuberosum OX=4113 GN=ATG8CL PE=1 SV=1)	PF02991(Atg8:Autophagy protein Atg8 ubiquitin like); PF04110(APG12:Ubiquitin-like autophagy protein Apg12)
TRINITY_DN15155_c0_g2		1.5333	0	4.31	4.6733	0.79	2.7033	5.18	1.96
TRINITY_DN15159_c0_g2		12.61	15.0133	1.1467	7.67	6.2467	0.57	5.69	12.3933	PREDICTED: cyclin-dependent kinase G-2-like isoform X1 [Lupinus angustifolius] >OIW17763.1 hypothetical protein TanjilG_06448 [Lupinus angustifolius]	ENOG410XQ50(Cyclin-dependent kinase)	sp|A2XUW1|CDKG2_ORYSI(Cyclin-dependent kinase G-2 OS=Oryza sativa subsp. indica OX=39946 GN=CDKG-2 PE=3 SV=1)	PF00069(Pkinase:Protein kinase domain); PF07714(Pkinase_Tyr:Protein tyrosine kinase); PF06293(Kdo:Lipopolysaccharide kinase (Kdo/WaaP) family); PF12330(Haspin_kinase:Haspin like kinase domain); PF14531(Kinase-like:Kinase-like)
TRINITY_DN15164_c0_g1		12.6167	12.9533	12.7767	27.9167	7.58	0	16.14	26.57	hypothetical protein TanjilG_19963 [Lupinus angustifolius]	COG0513(purine NTP-dependent helicase activity)	sp|Q39189|RH7_ARATH(DEAD-box ATP-dependent RNA helicase 7 OS=Arabidopsis thaliana OX=3702 GN=RH7 PE=1 SV=2)	PF00270(DEAD:DEAD/DEAH box helicase)
TRINITY_DN15166_c0_g1		9.9267	5.3233	16.3333	2.05	3.82	12.8733	11.4633	5.1267	PREDICTED: chaperone protein dnaJ 20, chloroplastic-like [Lupinus angustifolius]	COG0484(ubiquitin-conjugating enzyme)	sp|Q9SDN0|DNJ20_ARATH(Chaperone protein dnaJ 20, chloroplastic OS=Arabidopsis thaliana OX=3702 GN=ATJ20 PE=1 SV=2)	PF00226(DnaJ:DnaJ domain)
TRINITY_DN15171_c0_g1		5.94	0	0	1.4233	0.1267	0	2.3933	0	hypothetical protein TanjilG_04904 [Lupinus angustifolius]	COG5369(Armadillo repeat containing 8)
TRINITY_DN15179_c0_g1		0.4033	1.0467	2.3833	2.2233	0.0967	1.4767	1.7933	1.5867	PREDICTED: subtilisin-like protease SBT1.8 [Lupinus angustifolius] >OIW18756.1 hypothetical protein TanjilG_13508 [Lupinus angustifolius]	COG1404(peptidase (S8 and S53, subtilisin, kexin, sedolisin)	sp|Q9ZUF6|SBT18_ARATH(Subtilisin-like protease SBT1.8 OS=Arabidopsis thaliana OX=3702 GN=SBT1.8 PE=1 SV=1)	PF17766(fn3_6:Fibronectin type-III domain)
TRINITY_DN15179_c0_g2		0.3467	1.2733	2.4367	1.5667	0.3967	1.5467	0.9867	1.6867	PREDICTED: subtilisin-like protease SBT1.8 [Lupinus angustifolius] >OIW18756.1 hypothetical protein TanjilG_13508 [Lupinus angustifolius]	COG1404(peptidase (S8 and S53, subtilisin, kexin, sedolisin)	sp|Q9ZUF6|SBT18_ARATH(Subtilisin-like protease SBT1.8 OS=Arabidopsis thaliana OX=3702 GN=SBT1.8 PE=1 SV=1)	PF00082(Peptidase_S8:Subtilase family); PF05922(Inhibitor_I9:Peptidase inhibitor I9); PF02225(PA:PA domain)
TRINITY_DN1517_c0_g2		86.3	68.3767	15.54	56.9267	104.063	45.69	32.8767	66.3033	PREDICTED: protein ORANGE-LIKE, chloroplastic-like [Lupinus angustifolius] >XP_019442997.1 PREDICTED: protein ORANGE-LIKE, chloroplastic-like [Lupinus angustifolius]	ENOG4110IJH(-)	sp|Q8VYD8|ORLIK_ARATH(Protein ORANGE-LIKE, chloroplastic OS=Arabidopsis thaliana OX=3702 GN=ORLIKE PE=1 SV=1)
TRINITY_DN15180_c0_g1		0.5233	1.4333	3.3467	1.6167	0.4233	2.3867	0.6633	2.3833	PREDICTED: uncharacterized protein LOC109330956 [Lupinus angustifolius] >OIV93845.1 hypothetical protein TanjilG_13860 [Lupinus angustifolius]	ENOG411155J(-)	sp|Q29Q81|SMR6_ARATH(Cyclin-dependent protein kinase inhibitor SMR6 OS=Arabidopsis thaliana OX=3702 GN=SMR6 PE=1 SV=1)
TRINITY_DN15190_c0_g1		2.5633	0.3233	0.0567	0.5667	0.49	0.7167	2.5267	0.2767	PREDICTED: probable carboxylesterase 9 [Lupinus angustifolius] >OIW20647.1 hypothetical protein TanjilG_18585 [Lupinus angustifolius]	COG0657(THN)	sp|O64641|CXE9_ARATH(Probable carboxylesterase 9 OS=Arabidopsis thaliana OX=3702 GN=CXE9 PE=2 SV=1)	PF07859(Abhydrolase_3:alpha/beta hydrolase fold); PF00135(COesterase:Carboxylesterase family)
TRINITY_DN15206_c0_g1		2.44	1.53	0	2.6467	2.74	5.68	1.49	3.74	PREDICTED: E3 ubiquitin-protein ligase BRE1-like 1 [Lupinus angustifolius] >OIW07639.1 hypothetical protein TanjilG_03747 [Lupinus angustifolius]	ENOG410Y5C6(e3 ubiquitin protein ligase)	sp|Q8RXD6|BRE1A_ARATH(E3 ubiquitin-protein ligase BRE1-like 1 OS=Arabidopsis thaliana OX=3702 GN=HUB1 PE=1 SV=1)
TRINITY_DN15218_c0_g1		874.02	313.93	51.9933	377.393	486.323	227.737	847.077	159	ribonuclease H [Trifolium pratense]			PF13966(zf-RVT:zinc-binding in reverse transcriptase)
TRINITY_DN1521_c0_g1		3.52	1.1867	0.3833	1.17	3.24	0.7467	1.5267	1.05	hypothetical protein TanjilG_30808 [Lupinus angustifolius]	ENOG410XQ8V(synthase)	sp|Q3B724|CALS5_ARATH(Callose synthase 5 OS=Arabidopsis thaliana OX=3702 GN=CALS5 PE=1 SV=1)	PF14288(FKS1_dom1:1,3-beta-glucan synthase subunit FKS1, domain-1)
TRINITY_DN15232_c0_g1		1.3533	0.8333	4.3633	7.86	1.3467	1.2733	3.2633	1.9533	PREDICTED: uncharacterized protein LOC109336150 isoform X1 [Lupinus angustifolius] >XP_019428107.1 PREDICTED: uncharacterized protein LOC109336150 isoform X1 [Lupinus angustifolius] >OIV91242.1 hypothetical protein TanjilG_30464 [Lupinus angustifolius]	ENOG410YZEJ(-)
TRINITY_DN1523_c0_g1		1.56	10.2067	10.44	1.9067	19.17	12.2033	24.99	30.0767	hypothetical protein TanjilG_24825 [Lupinus angustifolius]	COG4886(leucine Rich Repeat)		PF00931(NB-ARC:NB-ARC domain)
TRINITY_DN15244_c0_g2		13.3933	4.49	3.35	6.44	5.8433	3.7167	8.97	5.7833	unnamed protein product, partial [Brassica oleracea]	COG5277(Actin-related protein)	sp|P53497|ACT12_ARATH(Actin-12 OS=Arabidopsis thaliana OX=3702 GN=ACT12 PE=1 SV=1)	PF00022(Actin:Actin)
TRINITY_DN15248_c0_g1		1.1033	4.9133	7.2167	5.2433	3.5767	5.0533	3.4367	2.63	PREDICTED: DNA (cytosine-5	ENOG410XQ4Y(DNA (cytosine-5-)-methyltransferase)	sp|Q9M548|DRM2_ARATH(DNA (cytosine-5)-methyltransferase DRM2 OS=Arabidopsis thaliana OX=3702 GN=DRM2 PE=1 SV=1)	PF18039(UBA_6:UBA-like domain)
TRINITY_DN15251_c0_g1		4.46	1.5	1.75	1.56	1	1.55	4.4733	0.75	PREDICTED: uncharacterized protein LOC109351531 isoform X1 [Lupinus angustifolius]	ENOG4111KKZ(-)
TRINITY_DN15254_c0_g1		40.3	12.4167	4.63	16.2833	20.87	13.19	23.6033	8.8233	PREDICTED: putative pectinesterase/pectinesterase inhibitor 45 [Lupinus angustifolius] >OIV98338.1 hypothetical protein TanjilG_16665 [Lupinus angustifolius]	COG4677(pectinesterase)	sp|Q9SMY6|PME45_ARATH(Putative pectinesterase/pectinesterase inhibitor 45 OS=Arabidopsis thaliana OX=3702 GN=PME45 PE=2 SV=1)	PF01095(Pectinesterase:Pectinesterase); PF04043(PMEI:Plant invertase/pectin methylesterase inhibitor)
TRINITY_DN15261_c0_g1		0.4833	2.2233	4.7133	1.7467	0.7433	6.8967	2.15	1.8867	PREDICTED: G-type lectin S-receptor-like serine/threonine-protein kinase LECRK4 [Lupinus angustifolius]	COG0515(Serine Threonine protein kinase)	sp|Q25AG2|LERK4_ORYSI(G-type lectin S-receptor-like serine/threonine-protein kinase LECRK4 OS=Oryza sativa subsp. indica OX=39946 GN=LECRK4 PE=3 SV=1)	PF00069(Pkinase:Protein kinase domain); PF07714(Pkinase_Tyr:Protein tyrosine kinase); PF01453(B_lectin:D-mannose binding lectin); PF00954(S_locus_glycop:S-locus glycoprotein domain); PF17667(Pkinase_fungal:Fungal protein kinase)
TRINITY_DN15262_c0_g1		1.59	0.3833	4.3433	2.68	0.69	0.26	0.5033	2.4067	hypothetical protein TanjilG_22800 [Lupinus angustifolius]	ENOG410YF6C(Cupin family)	sp|F4IQK5|VCL21_ARATH(Vicilin-like seed storage protein At2g18540 OS=Arabidopsis thaliana OX=3702 GN=At2g18540 PE=3 SV=1)	PF00190(Cupin_1:Cupin); PF07883(Cupin_2:Cupin domain)
TRINITY_DN15263_c0_g1		0	3.1567	4.18	2.1133	15.0967	1.9167	2.3167	5.3533	hypothetical protein PHAVU_008G086100g [Phaseolus vulgaris] >BAG06679.1 calcineurin B-like protein [Phaseolus vulgaris] >ESW12119.1 hypothetical protein PHAVU_008G086100g [Phaseolus vulgaris]	COG5126(Calcium-binding protein); COG5126(Calcium-binding protein); COG5126(Calcium-binding protein)	sp|Q8LAS7|CNBL2_ARATH(Calcineurin B-like protein 2 OS=Arabidopsis thaliana OX=3702 GN=CBL2 PE=1 SV=2)	PF00036(EF-hand_1:EF hand); PF13499(EF-hand_7:EF-hand domain pair); PF13405(EF-hand_6:EF-hand domain); PF13202(EF-hand_5:EF hand); PF13833(EF-hand_8:EF-hand domain pair)
TRINITY_DN15264_c0_g1		12.9267	44.5333	182.423	107.9	24.8067	52.9933	48.25	102.997
TRINITY_DN15266_c0_g1		0.51	0.1067	0.24	4.01	1.81	1.0533	0.6	0.5	PREDICTED: pathogenesis-related genes transcriptional activator PTI5-like [Lupinus angustifolius] >XP_019418726.1 PREDICTED: pathogenesis-related genes transcriptional activator PTI5-like [Lupinus angustifolius]	ENOG410YP8B(Transcription factor)	sp|O04681|PTI5_SOLLC(Pathogenesis-related genes transcriptional activator PTI5 OS=Solanum lycopersicum OX=4081 GN=PTI5 PE=2 SV=1)	PF00847(AP2:AP2 domain)
TRINITY_DN15273_c0_g1		0.45	0.4833	4.0433	3.0467	0.6533	1.7467	1.3833	4.1867	PREDICTED: cytokinin dehydrogenase 6-like [Lupinus angustifolius]	COG0277(FAD linked oxidase domain protein)	sp|O22213|CKX1_ARATH(Cytokinin dehydrogenase 1 OS=Arabidopsis thaliana OX=3702 GN=CKX1 PE=1 SV=1)	PF09265(Cytokin-bind:Cytokinin dehydrogenase 1, FAD and cytokinin binding)
TRINITY_DN15285_c0_g1		0.8	3.0067	4.5967	4.0467	1.4933	4.4933	7.8933	9.9467	PREDICTED: ABC transporter B family member 21-like [Lupinus angustifolius] >XP_019441258.1 PREDICTED: ABC transporter B family member 21-like [Lupinus angustifolius] >XP_019441259.1 PREDICTED: ABC transporter B family member 21-like [Lupinus angustifolius] >XP_019441260.1 PREDICTED: ABC transporter B family member 21-like [Lupinus angustifolius] >OIW13018.1 hypothetical protein TanjilG_15467 [Lup…	COG1132((ABC) transporter)	sp|Q9M0M2|AB9B_ARATH(ABC transporter B family member 9 OS=Arabidopsis thaliana OX=3702 GN=ABCB9 PE=3 SV=2)
TRINITY_DN15286_c0_g1		0.1333	2.9667	0.1133	0.26	1.27	0.03	0.7	1.5267
TRINITY_DN15287_c1_g2		2.2267	0.9033	0.1067	0.7867	1.5467	0.2567	1.5567	0.3167	PREDICTED: heparan-alpha-glucosaminide N-acetyltransferase-like [Lupinus angustifolius]	COG4299(heparan-alpha-glucosaminide n-acetyltransferase)	sp|Q3UDW8|HGNAT_MOUSE(Heparan-alpha-glucosaminide N-acetyltransferase OS=Mus musculus OX=10090 GN=Hgsnat PE=1 SV=2)
TRINITY_DN15290_c0_g1		2.69	4.7467	6.0067	4	2.8833	11.3167	0.6367	2.2367
TRINITY_DN15294_c0_g1		0.26	0.3333	9.2467	0.3267	0.1733	0.3	0.3333	5.5233	PREDICTED: transcription factor MYB108-like isoform X1 [Lupinus angustifolius] >OIW21095.1 hypothetical protein TanjilG_29228 [Lupinus angustifolius]	COG5147(BRCT)	sp|Q2QZJ8|JAMYB_ORYSJ(Transcription factor JAMYB OS=Oryza sativa subsp. japonica OX=39947 GN=JAMYB PE=2 SV=1)	PF00249(Myb_DNA-binding:Myb-like DNA-binding domain)
TRINITY_DN15295_c0_g1		0.51	0.5833	1.84	1.03	1.3333	5.3967	0.3367	0.4267	PREDICTED: uncharacterized protein LOC109329747 isoform X1 [Lupinus angustifolius] >OIV96125.1 hypothetical protein TanjilG_13057 [Lupinus angustifolius]	ENOG410YNGI(PLAC8 family)
TRINITY_DN15302_c0_g1		3.46	3.16	12.41	2.66	3.7533	4.2933	0.9133	8.6	PREDICTED: cell division protein FtsZ homolog 2-1, chloroplastic-like [Lupinus angustifolius] >OIV92220.1 hypothetical protein TanjilG_31139 [Lupinus angustifolius]	COG0206(Essential cell division protein that forms a contractile ring structure (Z ring) at the future cell division site. The regulation of the ring assembly controls the timing and the location of cell division. One of the functions of the FtsZ ring is to recruit other cell division proteins to the septum to produce a new cell wall between the dividing cells. Binds GTP and shows GTPase activity…
TRINITY_DN15303_c0_g1		2.5067	35.82	13.4567	14.1867	0	21.4033	5.46	38.1367	heat shock protein 90-5, chloroplastic [Cajanus cajan] >KYP45018.1 Endoplasmin isogeny [Cajanus cajan]	COG0326(Molecular chaperone. Has ATPase activity (By similarity))	sp|Q9SIF2|HS905_ARATH(Heat shock protein 90-5, chloroplastic OS=Arabidopsis thaliana OX=3702 GN=HSP90-5 PE=1 SV=1)	PF00183(HSP90:Hsp90 protein)
TRINITY_DN15314_c0_g1		1.1033	3.3867	5.23	5.1267	3.4967	3	1.1767	2.96	PREDICTED: probable signal peptidase complex subunit 1 [Lupinus angustifolius] >XP_019460237.1 PREDICTED: probable signal peptidase complex subunit 1 [Lupinus angustifolius] >OIW18013.1 hypothetical protein TanjilG_07597 [Lupinus angustifolius]	ENOG4112B75(Signal peptidase complex subunit)	sp|Q944J0|SPCS1_ARATH(Probable signal peptidase complex subunit 1 OS=Arabidopsis thaliana OX=3702 GN=At2g22425 PE=3 SV=1)	PF06645(SPC12:Microsomal signal peptidase 12 kDa subunit (SPC12))
TRINITY_DN15325_c0_g1		10.7633	0.8667	2.5467	11.8367	7.2367	6.8967	0.92	1.66
TRINITY_DN15327_c0_g1		0.3767	0.2033	0	0.04	0	0	3.2433	0
TRINITY_DN15337_c0_g4		0	0.4733	0.44	0.1	0.0133	0.0467	0.95	0.56	PREDICTED: transcription factor TGA2.2-like isoform X1 [Lupinus angustifolius] >OIV99278.1 hypothetical protein TanjilG_17088 [Lupinus angustifolius]	ENOG410YEKH(Transcription factor)	sp|Q93XM6|TGA9_ARATH(Transcription factor TGA9 OS=Arabidopsis thaliana OX=3702 GN=TGA9 PE=1 SV=1)
TRINITY_DN15343_c0_g1		103.48	28.89	2.1533	26.4833	25.8767	14.5967	95.5933	30.9967	PREDICTED: uncharacterized protein LOC109358565 [Lupinus angustifolius] >OIW03845.1 hypothetical protein TanjilG_30121 [Lupinus angustifolius]	ENOG411248W(expressed protein); ENOG410YE8S(expressed protein)		PF04862(DUF642:Protein of unknown function (DUF642))
TRINITY_DN15346_c0_g2		0.9	1.6933	6.63	12.92	1.0033	4.6967	3.4233	4.3633
TRINITY_DN15349_c0_g1		20.15	8.51	2.9967	9.9267	10.6433	6.42	15.6833	5.66	PREDICTED: transmembrane protein 53 [Lupinus angustifolius]		sp|Q5PPS7|TM53A_XENLA(Transmembrane protein 53-A OS=Xenopus laevis OX=8355 GN=tmem53-a PE=2 SV=1)	PF05705(DUF829:Eukaryotic protein of unknown function (DUF829))
TRINITY_DN15359_c0_g1		533.49	180.227	31.7033	229.937	276.423	160.777	408.643	96.4867	hypothetical protein TanjilG_20911 [Lupinus angustifolius]			PF04043(PMEI:Plant invertase/pectin methylesterase inhibitor)
TRINITY_DN15361_c0_g1		2.4633	6.1067	1.4467	0.3833	6.5633	15.6533	1.58	5.7133	PREDICTED: serine/threonine-protein phosphatase 7 long form homolog [Lupinus angustifolius]
TRINITY_DN15361_c1_g1		0.95	1.0267	1.8167	0.9033	0.7367	0.23	0.3533	2.8667	PREDICTED: serine/threonine-protein phosphatase 7 long form homolog [Lupinus angustifolius]	COG0639(serine threonine-protein phosphatase)	sp|Q9LNG5|PPP7L_ARATH(Serine/threonine-protein phosphatase 7 long form homolog OS=Arabidopsis thaliana OX=3702 GN=MAIL3 PE=2 SV=1)	PF10536(PMD:Plant mobile domain)
TRINITY_DN15379_c0_g1		2.0833	5.2867	0.2133	1.9167	0.8567	1.39	4.2433	0.8367	hypothetical protein TSUD_110150 [Trifolium subterraneum]	COG2801(Retrotransposon protein)	sp|Q99315|YG31B_YEAST(Transposon Ty3-G Gag-Pol polyprotein OS=Saccharomyces cerevisiae (strain ATCC 204508 / S288c) OX=559292 GN=TY3B-G PE=1 SV=3)	PF17919(RT_RNaseH_2:RNase H-like domain found in reverse transcriptase); PF00078(RVT_1:Reverse transcriptase (RNA-dependent DNA polymerase)); PF17917(RT_RNaseH:RNase H-like domain found in reverse transcriptase); PF17921(Integrase_H2C2:Integrase zinc binding domain); PF08284(RVP_2:Retroviral aspartyl protease); PF03732(Retrotrans_gag:Retrotransposon gag protein); PF00665(rve:Integrase core domain…
TRINITY_DN15379_c1_g1		1.11	0.8233	1.9333	2.3267	0.9133	0.4867	2.7433	2.9467	hypothetical protein TSUD_391930 [Trifolium subterraneum]	ENOG410Z2SZ(-)		PF03732(Retrotrans_gag:Retrotransposon gag protein)
TRINITY_DN15382_c0_g1		0	0.81	0.5733	1.5833	0.11	0	2.0167	0	PREDICTED: SRSF protein kinase 1-like [Lupinus angustifolius] >OIW21565.1 hypothetical protein TanjilG_06307 [Lupinus angustifolius]	ENOG410XRBH(SRSF protein kinase)	sp|Q45FA5|SRPK_PHYPO(Serine/threonine-protein kinase SRPK OS=Physarum polycephalum OX=5791 PE=1 SV=1)	PF00069(Pkinase:Protein kinase domain); PF07714(Pkinase_Tyr:Protein tyrosine kinase)
TRINITY_DN15383_c0_g2		158.007	69.38	45.0833	134.673	128.2	58.8867	226.323	111.68
TRINITY_DN15387_c0_g1		0.14	5.7	0.2467	1.93	1.91	0.1833	0.1967	0.6133
TRINITY_DN15388_c0_g1		2.0967	5.3433	2.2533	3.83	3.4933	3.1167	0.38	2.7733	PREDICTED: mannose-1-phosphate guanylyltransferase 1-like [Lupinus angustifolius] >OIW14191.1 hypothetical protein TanjilG_21331 [Lupinus angustifolius]	COG1208(von Willebrand factor, type A)	sp|O22287|GMPP1_ARATH(Mannose-1-phosphate guanylyltransferase 1 OS=Arabidopsis thaliana OX=3702 GN=CYT1 PE=1 SV=1)	PF00132(Hexapep:Bacterial transferase hexapeptide (six repeats))
TRINITY_DN15390_c0_g1		1174.33	414.827	94.1567	488.603	605.49	387.74	1101.59	199.017
TRINITY_DN15399_c0_g1		22.7733	21.4267	15.7033	10.7033	17.3867	7.2633	25.9667	21.3933	PREDICTED: uncharacterized protein LOC109325438 [Lupinus angustifolius] >OIV99593.1 hypothetical protein TanjilG_17403 [Lupinus angustifolius]	COG1418(Endoribonuclease that initiates mRNA decay (By similarity))	sp|P54168|YPGQ_BACSU(Uncharacterized protein YpgQ OS=Bacillus subtilis (strain 168) OX=224308 GN=ypgQ PE=4 SV=1)	PF01966(HD:HD domain)
TRINITY_DN15405_c0_g1		4.6033	2.2367	1.1233	1.8467	5.83	15.4933	2.1767	8.9433	metal tolerance protein 11-like, partial [Ziziphus jujuba]	COG0053(Glycosyl transferase (Group 1)	sp|O80632|MTP11_ARATH(Metal tolerance protein 11 OS=Arabidopsis thaliana OX=3702 GN=MTP11 PE=2 SV=1)
TRINITY_DN15407_c0_g1		8.5033	23.4767	39.2367	27.3233	12.5567	22.4633	22.96	18.9067	PREDICTED: rhodanese-like domain-containing protein 4, chloroplastic [Lupinus angustifolius] >OIW02318.1 hypothetical protein TanjilG_11212 [Lupinus angustifolius]	ENOG4111G9P(-)	sp|Q9M158|STR4_ARATH(Rhodanese-like domain-containing protein 4, chloroplastic OS=Arabidopsis thaliana OX=3702 GN=STR4 PE=1 SV=2)	PF14159(CAAD:CAAD domains of cyanobacterial aminoacyl-tRNA synthetase)
TRINITY_DN1540_c0_g1		1.1467	0	2.1433	0.62	1.33	4.7867	0	2.03
TRINITY_DN15415_c0_g1		2.9567	21.3	27.6167	31.4767	6.71	24.5967	14.72	21.19	PREDICTED: UDP-glucose flavonoid 3-O-glucosyltransferase 7-like [Lupinus angustifolius]	COG1819(LSD1 zinc finger domain containing protein, expressed)	sp|Q2V6J9|UFOG7_FRAAN(UDP-glucose flavonoid 3-O-glucosyltransferase 7 OS=Fragaria ananassa OX=3747 GN=GT7 PE=1 SV=1)	PF00201(UDPGT:UDP-glucoronosyl and UDP-glucosyl transferase)
TRINITY_DN1541_c0_g1		323.02	210.3	148.7	188.82	347.177	123.817	127.993	80.51	hypothetical protein A4A49_29299 [Nicotiana attenuata]			PF09713(A_thal_3526:Plant protein 1589 of unknown function (A_thal_3526))
TRINITY_DN15422_c0_g1		0.98	0.35	0.02	0.1667	0.3033	0.19	1.0033	0.24	PREDICTED: (+	COG1028(Dehydrogenase reductase)	sp|B2X050|MNR1_CAPAN((+)-neomenthol dehydrogenase OS=Capsicum annuum OX=4072 GN=MNR1 PE=1 SV=1)	PF00106(adh_short:short chain dehydrogenase); PF13561(adh_short_C2:Enoyl-(Acyl carrier protein) reductase); PF08659(KR:KR domain); PF01370(Epimerase:NAD dependent epimerase/dehydratase family)
TRINITY_DN15422_c0_g2		1.4767	0.3033	0.0933	0.4867	0.5067	0.0933	2.0033	0.24	PREDICTED: (+	COG1028(Dehydrogenase reductase)	sp|Q9M2E2|SDR1_ARATH((+)-neomenthol dehydrogenase OS=Arabidopsis thaliana OX=3702 GN=SDR1 PE=1 SV=1)	PF00106(adh_short:short chain dehydrogenase); PF13561(adh_short_C2:Enoyl-(Acyl carrier protein) reductase); PF08659(KR:KR domain); PF01370(Epimerase:NAD dependent epimerase/dehydratase family)
TRINITY_DN15422_c0_g3		2.1633	0.3667	0.0533	0.41	0.2967	0.3467	2.2133	0.32	PREDICTED: (+	COG1028(Dehydrogenase reductase)	sp|B2X050|MNR1_CAPAN((+)-neomenthol dehydrogenase OS=Capsicum annuum OX=4072 GN=MNR1 PE=1 SV=1)	PF00106(adh_short:short chain dehydrogenase); PF13561(adh_short_C2:Enoyl-(Acyl carrier protein) reductase); PF08659(KR:KR domain); PF01370(Epimerase:NAD dependent epimerase/dehydratase family)
TRINITY_DN15426_c0_g1		2.3067	0.43	0.1667	0.58	0.9233	0.4733	2.06	0.2533	hypothetical protein TanjilG_28993 [Lupinus angustifolius]	ENOG410ZSPH(-)
TRINITY_DN15434_c0_g1		0.2167	0.74	1.78	0.8233	0.6733	1.1567	1.1133	0.6133	PREDICTED: transcription repressor OFP13-like [Lupinus angustifolius] >OIW12954.1 hypothetical protein TanjilG_15403 [Lupinus angustifolius]	ENOG410YHQG(atofp18 ofp18)	sp|Q9FMC8|OPF13_ARATH(Transcription repressor OFP13 OS=Arabidopsis thaliana OX=3702 GN=OFP13 PE=1 SV=1)	PF04844(Ovate:Transcriptional repressor, ovate)
TRINITY_DN15453_c0_g1		4.4233	2.1533	0.9567	1.8033	1.76	1.1933	4.0133	1.2233	PREDICTED: probable serine/threonine-protein kinase PBL5 [Lupinus angustifolius] >OIW09162.1 hypothetical protein TanjilG_11300 [Lupinus angustifolius]	COG0515(Serine Threonine protein kinase)	sp|Q9SIB6|PBL6_ARATH(Probable serine/threonine-protein kinase PBL6 OS=Arabidopsis thaliana OX=3702 GN=PBL6 PE=2 SV=1)	PF07714(Pkinase_Tyr:Protein tyrosine kinase); PF00069(Pkinase:Protein kinase domain)
TRINITY_DN15461_c0_g1		6.85	0	0	0	18.5933	0	0	16.21	hypothetical protein TanjilG_22349 [Lupinus angustifolius]	COG5018(K+ potassium transporter)
TRINITY_DN15469_c0_g1		0	1.3567	2.4533	0	1.53	2.0333	2.8333	0
TRINITY_DN15475_c0_g2		1.1633	2.9167	0.7767	0.7067	1.0833	0	2.1033	1.7
TRINITY_DN15477_c0_g1		0.0467	1.0167	1.3133	1.3133	0.3567	1.7133	0.6833	0.4733
TRINITY_DN15479_c0_g1		0	1.0767	0	0.4	1.9267	2.61	0	0.3133
TRINITY_DN15480_c0_g1		0.36	0	1.28	0.5967	0.26	0.1333	0.0667	0.9267	hypothetical protein LR48_Vigan08g178500 [Vigna angularis]	COG5033(myeloid lymphoid or mixed-lineage leukemia (trithorax homolog, Drosophila))	sp|Q9FH40|TA14B_ARATH(Transcription initiation factor TFIID subunit 14b OS=Arabidopsis thaliana OX=3702 GN=TAF14B PE=1 SV=1)	PF03366(YEATS:YEATS family)
TRINITY_DN15483_c0_g2		47.0067	15.96	3.57	18.69	26.87	13.0433	35.6633	10	PREDICTED: putative clathrin assembly protein At5g35200 isoform X1 [Lupinus angustifolius] >XP_019429932.1 PREDICTED: putative clathrin assembly protein At5g35200 isoform X2 [Lupinus angustifolius] >XP_019429933.1 PREDICTED: putative clathrin assembly protein At5g35200 isoform X1 [Lupinus angustifolius] >XP_019429934.1 PREDICTED: putative clathrin assembly protein At5g35200 isoform X2 [Lupinus an…	ENOG410XQ90(Clathrin assembly protein)	sp|Q9LHS0|CAP10_ARATH(Putative clathrin assembly protein At5g35200 OS=Arabidopsis thaliana OX=3702 GN=At5g35200 PE=1 SV=1)	PF07651(ANTH:ANTH domain)
TRINITY_DN15490_c0_g1		5.0967	1.57	0.2733	1.61	2.68	1.1733	3.84	0.7233	PREDICTED: uncharacterized protein LOC109337080 [Lupinus angustifolius] >OIV90004.1 hypothetical protein TanjilG_00350 [Lupinus angustifolius]	ENOG410YEIE(CONTAINS InterPro DOMAIN s Munc13 homology 1 (InterPro IPR014770), Protein of)	sp|Q8RX56|UNC13_ARATH(Protein unc-13 homolog OS=Arabidopsis thaliana OX=3702 GN=PATROL1 PE=2 SV=1)	PF05664(DUF810:Plant family of unknown function (DUF810))
TRINITY_DN15493_c0_g1		1.9067	4.79	5.51	9.29	3.9267	4.67	5.78	8.0767	PREDICTED: uncharacterized protein LOC105765014 isoform X2 [Gossypium raimondii] >XP_012439340.1 PREDICTED: uncharacterized protein LOC105765014 isoform X2 [Gossypium raimondii]	ENOG410YHD1(LSD1 zinc finger domain containing protein, expressed)	sp|Q93ZB1|LOL1_ARATH(Protein LOL1 OS=Arabidopsis thaliana OX=3702 GN=LOL1 PE=2 SV=1)
TRINITY_DN15496_c0_g1		3.2067	1.8967	0.0333	1.73	0.1133	0.1833	2.0367	0.5733	PREDICTED: light-induced protein, chloroplastic-like [Lupinus angustifolius] >OIV91829.1 hypothetical protein TanjilG_17821 [Lupinus angustifolius]	ENOG4111PVP(negative regulation of photosynthesis, light reaction)	sp|Q9ZWQ8|PAP_CITUN(Plastid-lipid-associated protein, chloroplastic OS=Citrus unshiu OX=55188 GN=PAP PE=2 SV=1)	PF04755(PAP_fibrillin:PAP_fibrillin)
TRINITY_DN15509_c0_g1		21.9233	11.5933	5.6467	8.1	10.2967	6.7667	20.6567	4.9033	PREDICTED: E3 ubiquitin-protein ligase MIEL1-like [Lupinus angustifolius] >OIW18465.1 hypothetical protein TanjilG_13217 [Lupinus angustifolius]	ENOG410XXHF(ring finger and CHY zinc finger)	sp|Q8VZK0|MIEL1_ARATH(E3 ubiquitin-protein ligase MIEL1 OS=Arabidopsis thaliana OX=3702 GN=MIEL1 PE=1 SV=1)	PF05495(zf-CHY:CHY zinc finger)
TRINITY_DN15509_c0_g2		19.4933	10.94	6.5867	7.6467	9.7133	5.8833	19.9667	5.7667	PREDICTED: E3 ubiquitin-protein ligase MIEL1-like [Lupinus angustifolius] >OIW18465.1 hypothetical protein TanjilG_13217 [Lupinus angustifolius]	ENOG410XXHF(ring finger and CHY zinc finger)	sp|Q8VZK0|MIEL1_ARATH(E3 ubiquitin-protein ligase MIEL1 OS=Arabidopsis thaliana OX=3702 GN=MIEL1 PE=1 SV=1)	PF14599(zinc_ribbon_6:Zinc-ribbon); PF13639(zf-RING_2:Ring finger domain); PF13445(zf-RING_UBOX:RING-type zinc-finger); PF00097(zf-C3HC4:Zinc finger, C3HC4 type (RING finger)); PF13920(zf-C3HC4_3:Zinc finger, C3HC4 type (RING finger)); PF13923(zf-C3HC4_2:Zinc finger, C3HC4 type (RING finger)); PF14634(zf-RING_5:zinc-RING finger domain)
TRINITY_DN1550_c1_g1		6.8333	19.01	6.79	0.6567	9.92	35.05	1.51	3.3267	PREDICTED: AP-2 complex subunit alpha-1 [Eucalyptus grandis] >KCW50744.1 hypothetical protein EUGRSUZ_J00415 [Eucalyptus grandis]		sp|Q8LPL6|AP2A1_ARATH(AP-2 complex subunit alpha-1 OS=Arabidopsis thaliana OX=3702 GN=ALPHA-ADR PE=1 SV=1)
TRINITY_DN15513_c0_g1		1.2567	1.0833	1.0967	1.07	1.7133	5.5033	1.6933	0.3633	Retrovirus-related Pol polyprotein from transposon TNT 1-94 [Cajanus cajan]	ENOG410XS4D(Retrotransposon protein)	sp|Q9ZT94|POLR2_ARATH(Retrovirus-related Pol polyprotein from transposon RE2 OS=Arabidopsis thaliana OX=3702 GN=RE2 PE=4 SV=1)	PF07727(RVT_2:Reverse transcriptase (RNA-dependent DNA polymerase)); PF00665(rve:Integrase core domain); PF14244(Retrotran_gag_3:gag-polypeptide of LTR copia-type); PF14223(Retrotran_gag_2:gag-polypeptide of LTR copia-type); PF13976(gag_pre-integrs:GAG-pre-integrase domain); PF03732(Retrotrans_gag:Retrotransposon gag protein)
TRINITY_DN15513_c1_g1		0.0567	0.86	0	0.05	0.0633	0	2.9333	0	PREDICTED: uncharacterized protein LOC109332480 [Lupinus angustifolius]
TRINITY_DN15523_c0_g1		81.1167	69.2367	23.63	34.4767	51.01	15.3333	22.7667	44.47	PREDICTED: GDSL esterase/lipase EXL1-like [Lupinus angustifolius]	COG3240(GDSL esterase lipase)	sp|Q94CH8|EXL1_ARATH(GDSL esterase/lipase EXL1 OS=Arabidopsis thaliana OX=3702 GN=EXL1 PE=2 SV=1)	PF00657(Lipase_GDSL:GDSL-like Lipase/Acylhydrolase)
TRINITY_DN15524_c0_g1		25.21	31.9667	16.39	85.2033	77.0433	67.89	64.21	128.707
TRINITY_DN15526_c0_g1		42.2333	15.1	2.0167	14.1933	25.32	9.1967	28.24	8.4867	PREDICTED: glycerophosphodiester phosphodiesterase GDPDL7-like [Lupinus angustifolius]	COG0584(glycerophosphoryl diester phosphodiesterase)	sp|Q9FGT9|GPDL6_ARATH(Glycerophosphodiester phosphodiesterase GDPDL6 OS=Arabidopsis thaliana OX=3702 GN=GDPDL6 PE=2 SV=1)
TRINITY_DN15527_c0_g1		7.5033	2.4533	2.2867	3.8967	0	1.88	0	2.4933	PREDICTED: uncharacterized protein LOC109356831 isoform X1 [Lupinus angustifolius] >OIW04190.1 hypothetical protein TanjilG_00750 [Lupinus angustifolius]	COG5184(regulator of chromosome condensation); COG5184(regulator of chromosome condensation)
TRINITY_DN15532_c0_g1		27.03	12.7267	6.0267	10.2067	17.5767	10.0567	18.9967	9.3533	PREDICTED: solute carrier family 25 member 44-like [Lupinus angustifolius]	ENOG410XTGQ(Solute carrier family 25 member)	sp|Q8BGF9|S2544_MOUSE(Solute carrier family 25 member 44 OS=Mus musculus OX=10090 GN=Slc25a44 PE=1 SV=1)	PF00153(Mito_carr:Mitochondrial carrier protein)
TRINITY_DN15536_c0_g1		0	1.9233	6.1033	0.0567	0	0	0.3167	0	PREDICTED: probable receptor-like protein kinase At1g11050 isoform X1 [Lupinus angustifolius]	COG0515(Serine Threonine protein kinase)	sp|O04086|Y1105_ARATH(Probable receptor-like protein kinase At1g11050 OS=Arabidopsis thaliana OX=3702 GN=At1g11050 PE=2 SV=1)
TRINITY_DN15542_c0_g1		12.42	3.6233	1.7867	7.2267	8.9033	6.01	10.4333	2.3867	hypothetical protein CR513_35367, partial [Mucuna pruriens]
TRINITY_DN15543_c0_g1		8.4367	7.68	4.69	26.7833	5.52	0	8.1933	14.18	hypothetical protein TanjilG_19956 [Lupinus angustifolius]	COG0476(small protein activating enzyme activity)	sp|Q9SJT1|SAE2_ARATH(SUMO-activating enzyme subunit 2 OS=Arabidopsis thaliana OX=3702 GN=SAE2 PE=1 SV=1)
TRINITY_DN15545_c0_g1		17.71	8.9633	10.73	5.8367	15.0833	0.8167	36.39	23.1067
TRINITY_DN15548_c0_g1		1.4833	8.3267	4.2867	7.9133	0.6467	0.45	3.6867	3.3267
TRINITY_DN15551_c0_g1		3.5233	4.0967	1.87	0	0	5.6467	8.21	6.1333	PREDICTED: uncharacterized protein LOC109328777 [Lupinus angustifolius] >OIV96644.1 hypothetical protein TanjilG_28501 [Lupinus angustifolius]	COG2267(alpha beta hydrolase fold)	sp|Q9C942|CSE_ARATH(Caffeoylshikimate esterase OS=Arabidopsis thaliana OX=3702 GN=CSE PE=1 SV=1)	PF12146(Hydrolase_4:Serine aminopeptidase, S33)
TRINITY_DN1555_c1_g1		2.9233	0	0.58	4	1.9867	0	9.4433	6.35
TRINITY_DN15578_c0_g1		1.5267	1.6833	6.4933	2.05	0.9333	4.0667	0.2	3.1233	hypothetical protein TanjilG_23951 [Lupinus angustifolius]	ENOG41121N2(zinc ion binding)	sp|O22197|RHC1A_ARATH(Probable E3 ubiquitin-protein ligase RHC1A OS=Arabidopsis thaliana OX=3702 GN=RHC1A PE=2 SV=1)
TRINITY_DN15582_c0_g1		0.93	0.1067	0.7767	1.1167	0.5133	0.6333	0.5033	0.4967	bZIP transcription factor 16 isoform X3 [Momordica charantia]	ENOG410Y53Y(Transcription factor)	sp|Q501B2|BZP16_ARATH(bZIP transcription factor 16 OS=Arabidopsis thaliana OX=3702 GN=BZIP16 PE=1 SV=1)	PF07777(MFMR:G-box binding protein MFMR)
TRINITY_DN15589_c0_g1		24.0067	4.6133	1.4267	6.2833	9.8	5.6167	12.7	3.79	PREDICTED: nuclear polyadenylated RNA-binding protein 3-like [Lupinus angustifolius] >OIW00245.1 hypothetical protein TanjilG_27496 [Lupinus angustifolius]	ENOG41115CP(-)
TRINITY_DN15589_c0_g2		13.6733	4.8633	0.82	5.1933	7.13	2.86	9.79	2.7267	PREDICTED: nucleoplasmin-like protein ANO39 isoform X1 [Lupinus angustifolius] >OIW17786.1 hypothetical protein TanjilG_06471 [Lupinus angustifolius]	ENOG41115CP(-)
TRINITY_DN15601_c0_g1		27.28	0.0533	31.1067	31.72	0	9.5967	4.1767	6.89
TRINITY_DN15602_c0_g1		0.51	2.3067	26.88	4.2733	2.1867	16	1.37	3.28	PREDICTED: F-box/kelch-repeat protein At2g44130-like [Lupinus angustifolius] >OIW00600.1 hypothetical protein TanjilG_14826 [Lupinus angustifolius]	ENOG4110X8D(Kelch repeat-containing F-box family protein)	sp|O80582|FBK46_ARATH(F-box/kelch-repeat protein At2g44130 OS=Arabidopsis thaliana OX=3702 GN=At2g44130 PE=2 SV=2)	PF01344(Kelch_1:Kelch motif); PF13964(Kelch_6:Kelch motif); PF13415(Kelch_3:Galactose oxidase, central domain); PF07646(Kelch_2:Kelch motif); PF00646(F-box:F-box domain)
TRINITY_DN15605_c0_g2		35.4333	153.273	22.83	69.4067	55.3533	1.0167	47.4967	1.9067	PREDICTED: (RS	ENOG410XS7T(o-methyltransferase)	sp|Q9T003|ASMT_ARATH(Acetylserotonin O-methyltransferase OS=Arabidopsis thaliana OX=3702 GN=ASMT PE=1 SV=1)	PF00891(Methyltransf_2:O-methyltransferase domain)
TRINITY_DN15606_c0_g1		4.75	2.0533	1.9	2.84	1.37	1.1067	1.5233	1.8267	PREDICTED: CASP-like protein 1F2 [Lupinus angustifolius]	ENOG411140T(CASP-like protein)	sp|B9RH17|CSPLA_RICCO(CASP-like protein 1F2 OS=Ricinus communis OX=3988 GN=RCOM_1446020 PE=2 SV=1)	PF04535(DUF588:Domain of unknown function (DUF588)); PF01284(MARVEL:Membrane-associating domain)
TRINITY_DN15611_c1_g1		0.1833	0.8967	1.5567	1.2967	0.5667	1.1033	0.9733	0.96	PREDICTED: probable inactive patatin-like protein 9 [Lupinus angustifolius] >OIW06743.1 hypothetical protein TanjilG_11468 [Lupinus angustifolius]	COG3621(Patatin group); ENOG410ZRJ2(-)	sp|Q93ZQ3|PLP9_ARATH(Probable inactive patatin-like protein 9 OS=Arabidopsis thaliana OX=3702 GN=PLP9 PE=2 SV=1)	PF01734(Patatin:Patatin-like phospholipase)
TRINITY_DN15613_c0_g1		3.7433	0.94	0.1367	0.3367	0.1867	0.0767	1.2433	0.71	PREDICTED: uncharacterized protein LOC109356012 [Lupinus angustifolius] >OIW04407.1 hypothetical protein TanjilG_32599 [Lupinus angustifolius]	ENOG41107VA(-)
TRINITY_DN15622_c0_g2		0.7133	1.22	0.87	0.25	1.6433	1.03	1.3067	0.0633	PREDICTED: uncharacterized protein LOC109350874 [Lupinus angustifolius]	COG5374(b-cell receptor-associated protein)		PF05529(Bap31:Bap31/Bap29 transmembrane region); PF18035(Bap31_Bap29_C:Bap31/Bap29 cytoplasmic coiled-coil domain)
TRINITY_DN15636_c0_g1		3.3367	0.56	1.46	1.0667	6.7333	1.1633	1.2367	0.3133	PREDICTED: uncharacterized protein LOC109348071 [Lupinus angustifolius]	COG2801(Retrotransposon protein)
TRINITY_DN15638_c0_g1		0.0367	0.4933	0.6733	0.34	0.32	0.5533	7.1633	21.3467	Defensin protein [Spatholobus suberectus]		sp|P18646|DEF_VIGUN(Defensin-like protein OS=Vigna unguiculata OX=3917 PE=3 SV=1)	PF00304(Gamma-thionin:Gamma-thionin family)
TRINITY_DN15640_c0_g1		540.873	112.913	63.39	120.197	119.533	87.2733	290.117	162.937	PREDICTED: protein ECERIFERUM 1-like isoform X1 [Lupinus angustifolius] >XP_019449609.1 PREDICTED: protein ECERIFERUM 1-like isoform X2 [Lupinus angustifolius]	ENOG4111G66(In eubacteria ppGpp (guanosine 3'-diphosphate 5-' diphosphate) is a mediator of the stringent response that coordinates a variety of cellular activities in response to changes in nutritional abundance (By similarity)); ENOG4111G66(In eubacteria ppGpp (guanosine 3'-diphosphate 5-' diphosphate) is a mediator of the stringent response that coordinates a variety of cellular activities in …	sp|F4HVY0|CER1_ARATH(Very-long-chain aldehyde decarbonylase CER1 OS=Arabidopsis thaliana OX=3702 GN=CER1 PE=1 SV=1)	PF04116(FA_hydroxylase:Fatty acid hydroxylase superfamily); PF12076(Wax2_C:WAX2 C-terminal domain)
TRINITY_DN15641_c0_g1		1.1633	6.67	6.7733	6.3	2.6533	6.72	4.7533	3.49	PREDICTED: uncharacterized protein At5g41620-like [Lupinus angustifolius] >OIW05881.1 hypothetical protein TanjilG_23667 [Lupinus angustifolius]	ENOG410YDND(-)
TRINITY_DN15651_c0_g1		1.85	15.3467	22.52	14.2367	6.97	16.36	8.9967	9.7433	PREDICTED: VAN3-binding protein-like [Lupinus angustifolius] >OIV91342.1 hypothetical protein TanjilG_01960 [Lupinus angustifolius]	ENOG4111DWT(Plant pleckstrin homology-like region)	sp|Q8W4K5|VAB_ARATH(VAN3-binding protein OS=Arabidopsis thaliana OX=3702 GN=VAB PE=1 SV=1)	PF05703(Auxin_canalis:Auxin canalisation); PF08458(PH_2:Plant pleckstrin homology-like region)
TRINITY_DN1565_c0_g3		4.4867	9.0967	0.0433	0.23	0.4567	0.2933	0.7233	0.1733	hypothetical protein TanjilG_23925 [Lupinus angustifolius]	ENOG410XSE0(Major Facilitator superfamily)	sp|Q94BZ1|ZIFL1_ARATH(Protein ZINC INDUCED FACILITATOR-LIKE 1 OS=Arabidopsis thaliana OX=3702 GN=ZIFL1 PE=2 SV=1)
TRINITY_DN15668_c0_g1		30.1267	75.5867	292.967	74.5367	42.68	90.1533	112.37	74.7433	PREDICTED: uncharacterized protein LOC109334700 [Lupinus angustifolius] >XP_019426150.1 PREDICTED: uncharacterized protein LOC109334700 [Lupinus angustifolius] >XP_019426151.1 PREDICTED: uncharacterized protein LOC109334700 [Lupinus angustifolius] >OIV92223.1 hypothetical protein TanjilG_31142 [Lupinus angustifolius]	ENOG4111QDI(Alpha beta hydrolase fold protein)		PF00561(Abhydrolase_1:alpha/beta hydrolase fold); PF12697(Abhydrolase_6:Alpha/beta hydrolase family); PF12146(Hydrolase_4:Serine aminopeptidase, S33)
[truncated: 5,542 more rows]
