# Supplementary material for: Comparative transcriptome analysis of Lupinus polyphyllus Lindl. provides a rich molecular resource for research on coloration mechanism
Source: PeerJ. 2022 Aug 2;10:e13836. doi: 10.7717/peerj.13836 (PMC9354738; doi:10.7717/peerj.13836)
Supplement: Supplemental Information 6 — The differentially expressed genes (DEGs) statistics analysis of 28 comparison groups [file peerj-10-13836-s006.xlsx]

## Sheet: Sheet 1
Supplementary Table 5. Comparison analysis. The differentially expressed genes (DEGs) statistics analysis of 28 comparison groups
diff_group	total DEGs	up	down
PYH_vs_PIK	1755	1051	704
PUL_vs_YEL	2069	1076	993
WHT_vs_YEL	2502	842	1660
RED_vs_PWH	2991	1837	1154
WHT_vs_PKW	1921	795	1126
RED_vs_PYH	2445	1362	1083
WHT_vs_PUL	3518	1156	2362
PKW_vs_PIK	2242	1074	1168
RED_vs_PUL	3014	1554	1460
WHT_vs_PIK	1854	830	1024
PWH_vs_PYH	1965	787	1178
WHT_vs_RED	3608	1243	2365
WHT_vs_PYH	2221	991	1230
PKW_vs_YEL	1443	754	689
RED_vs_PIK	4488	2623	1865
PUL_vs_PKW	1877	925	952
RED_vs_YEL	2514	1545	969
WHT_vs_PWH	2263	1019	1244
PUL_vs_PWH	2421	1578	843
PUL_vs_PIK	4842	2584	2258
PWH_vs_PKW	2313	1123	1190
PYH_vs_YEL	1818	918	900
PYH_vs_PKW	1578	850	728
PUL_vs_PYH	3357	1913	1444
PWH_vs_PIK	2865	1222	1643
RED_vs_PKW	3230	1982	1248
PWH_vs_YEL	1959	927	1032
YEL_vs_PIK	3156	2001	1155
