# Supplementary material for: Comparative transcriptome analysis of Lupinus polyphyllus Lindl. provides a rich molecular resource for research on coloration mechanism
Source: PeerJ. 2022 Aug 2;10:e13836. doi: 10.7717/peerj.13836 (PMC9354738; doi:10.7717/peerj.13836)
Supplement: Supplemental Information 7 — The functional annotation information of 101 anthocyanin-related genes and 76 carotenoid-related genes. [file peerj-10-13836-s007.xlsx]

## Sheet: Sheet1
Supplementary Table 6 Functional annotation. The functional annotation information of 101 anthocyanin-related genes and 76 carotenoid-related genes
Anthocyanin-related genes
TRINITY_DN51606_c0_g1	ABV23279.1	chalcone synthase [Lupinus albus]
TRINITY_DN29598_c0_g1	ABF59867.1	chalcone synthase, partial [Lupinus luteus]
TRINITY_DN28081_c0_g1	BAA22045.1	chalcone synthase, partial [Pisum sativum]
TRINITY_DN13380_c0_g1	AQW79577.1	chalcone synthase, partial [Stenopetalum velutinum]
TRINITY_DN97404_c0_g2	ANR76395.1	cinnamate 4-hydroxylase [Camptotheca acuminata]
TRINITY_DN86889_c0_g1	AIS92509.1	cinnamate 4-hydroxylase [Epimedium sagittatum]
TRINITY_DN41906_c0_g1	KDO71176.1	hypothetical protein CISIN_1g017946mg [Citrus sinensis]
TRINITY_DN24262_c0_g1	KOM26563.1	hypothetical protein LR48_Vigan293s001400 [Vigna angularis]
TRINITY_DN19628_c0_g1	OIW19610.1	hypothetical protein TanjilG_18420 [Lupinus angustifolius]
TRINITY_DN97404_c0_g1	OIW16101.1	hypothetical protein TanjilG_18816 [Lupinus angustifolius]
TRINITY_DN14737_c0_g1	GAU32891.1	hypothetical protein TSUD_393120 [Trifolium subterraneum]
TRINITY_DN2209_c0_g3	XP_019424835.1	PREDICTED: anthocyanidin 3-O-glucoside 2''-O-glucosyltransferase-like [Lupinus angustifolius] >OIV92544.1 hypothetical protein TanjilG_02307 [Lupinus angustifolius]
TRINITY_DN57840_c0_g1	XP_019424835.1	PREDICTED: anthocyanidin 3-O-glucoside 2''-O-glucosyltransferase-like [Lupinus angustifolius] >OIV92544.1 hypothetical protein TanjilG_02307 [Lupinus angustifolius]
TRINITY_DN71456_c0_g1	XP_019424835.1	PREDICTED: anthocyanidin 3-O-glucoside 2''-O-glucosyltransferase-like [Lupinus angustifolius] >OIV92544.1 hypothetical protein TanjilG_02307 [Lupinus angustifolius]
TRINITY_DN18889_c0_g1	XP_019437121.1	PREDICTED: anthocyanidin 3-O-glucoside 2''-O-glucosyltransferase-like [Lupinus angustifolius] >OIW15451.1 hypothetical protein TanjilG_28650 [Lupinus angustifolius]
TRINITY_DN25531_c0_g1	XP_019415716.1	PREDICTED: anthocyanidin 3-O-glucosyltransferase 2-like [Lupinus angustifolius] >OIV98321.1 hypothetical protein TanjilG_16648 [Lupinus angustifolius]
TRINITY_DN5434_c0_g2	XP_019415716.1	PREDICTED: anthocyanidin 3-O-glucosyltransferase 2-like [Lupinus angustifolius] >OIV98321.1 hypothetical protein TanjilG_16648 [Lupinus angustifolius]
TRINITY_DN35166_c0_g1	XP_019460668.1	PREDICTED: anthocyanidin 3-O-glucosyltransferase 2-like [Lupinus angustifolius] >OIW02447.1 hypothetical protein TanjilG_05040 [Lupinus angustifolius]
TRINITY_DN6806_c0_g1	XP_019460668.1	PREDICTED: anthocyanidin 3-O-glucosyltransferase 2-like [Lupinus angustifolius] >OIW02447.1 hypothetical protein TanjilG_05040 [Lupinus angustifolius]
TRINITY_DN76226_c0_g1	XP_019460668.1	PREDICTED: anthocyanidin 3-O-glucosyltransferase 2-like [Lupinus angustifolius] >OIW02447.1 hypothetical protein TanjilG_05040 [Lupinus angustifolius]
TRINITY_DN9840_c0_g1	XP_019460668.1	PREDICTED: anthocyanidin 3-O-glucosyltransferase 2-like [Lupinus angustifolius] >OIW02447.1 hypothetical protein TanjilG_05040 [Lupinus angustifolius]
TRINITY_DN83079_c0_g1	XP_019435330.1	PREDICTED: anthocyanidin 3-O-glucosyltransferase 7-like [Lupinus angustifolius] >OIW22010.1 hypothetical protein TanjilG_28669 [Lupinus angustifolius]
TRINITY_DN9537_c0_g1	XP_019435330.1	PREDICTED: anthocyanidin 3-O-glucosyltransferase 7-like [Lupinus angustifolius] >OIW22010.1 hypothetical protein TanjilG_28669 [Lupinus angustifolius]
TRINITY_DN20388_c0_g1	XP_019420559.1	PREDICTED: anthocyanidin reductase ((2S)-flavan-3-ol-forming) [Lupinus angustifolius] >OIV94584.1 hypothetical protein TanjilG_25646 [Lupinus angustifolius]
TRINITY_DN52252_c0_g1	XP_019431187.1	PREDICTED: anthocyanidin reductase ((2S)-flavan-3-ol-forming)-like [Lupinus angustifolius]
TRINITY_DN3238_c0_g2	XP_019419141.1	PREDICTED: anthocyanidin reductase ((2S)-flavan-3-ol-forming)-like [Lupinus angustifolius] >XP_019419142.1 PREDICTED: anthocyanidin reductase ((2S)-flavan-3-ol-forming)-like [Lupinus angustifolius]
TRINITY_DN7044_c1_g1	XP_019419141.1	PREDICTED: anthocyanidin reductase ((2S)-flavan-3-ol-forming)-like [Lupinus angustifolius] >XP_019419142.1 PREDICTED: anthocyanidin reductase ((2S)-flavan-3-ol-forming)-like [Lupinus angustifolius]
TRINITY_DN11736_c0_g1	XP_019445802.1	PREDICTED: caffeoyl-CoA O-methyltransferase [Lupinus angustifolius] >OIW10192.1 hypothetical protein TanjilG_27943 [Lupinus angustifolius]
TRINITY_DN77603_c0_g1	XP_019445802.1	PREDICTED: caffeoyl-CoA O-methyltransferase [Lupinus angustifolius] >OIW10192.1 hypothetical protein TanjilG_27943 [Lupinus angustifolius]
TRINITY_DN661_c0_g1	XP_019420388.1	PREDICTED: caffeoyl-CoA O-methyltransferase-like [Lupinus angustifolius]
TRINITY_DN7333_c0_g1	XP_019463888.1	PREDICTED: chalcone synthase 1 [Lupinus angustifolius]
TRINITY_DN40632_c0_g1	XP_019420991.1	PREDICTED: chalcone synthase 1-like [Lupinus angustifolius] >OIV94967.1 hypothetical protein TanjilG_22164 [Lupinus angustifolius]
TRINITY_DN69213_c0_g1	XP_019454331.1	PREDICTED: chalcone synthase 6-4-like [Lupinus angustifolius] >XP_019454332.1 PREDICTED: chalcone synthase 6-4-like [Lupinus angustifolius] >OIW05583.1 hypothetical protein TanjilG_23369 [Lupinus angustifolius]
TRINITY_DN7333_c0_g2	XP_019454331.1	PREDICTED: chalcone synthase 6-4-like [Lupinus angustifolius] >XP_019454332.1 PREDICTED: chalcone synthase 6-4-like [Lupinus angustifolius] >OIW05583.1 hypothetical protein TanjilG_23369 [Lupinus angustifolius]
TRINITY_DN7234_c0_g1	XP_019427416.1	PREDICTED: chalcone synthase isoform X1 [Lupinus angustifolius] >XP_019427417.1 PREDICTED: chalcone synthase isoform X2 [Lupinus angustifolius] >OIV90046.1 hypothetical protein TanjilG_21178 [Lupinus angustifolius]
TRINITY_DN85107_c0_g1	XP_019427855.1	PREDICTED: chalcone isomerase 2-like [Lupinus angustifolius] >OIV91238.1 hypothetical protein TanjilG_30460 [Lupinus angustifolius]
TRINITY_DN29758_c0_g1	XP_019441643.1	PREDICTED: chalcone isomerase 2-like [Lupinus angustifolius] >OIW12778.1 hypothetical protein TanjilG_24711 [Lupinus angustifolius]
TRINITY_DN9240_c0_g1	XP_019417813.1	PREDICTED: anthocyanidin 3-O-glucoside-6''-O-coumaroyltransferase 1-like [Lupinus angustifolius] >OIV96750.1 hypothetical protein TanjilG_11746 [Lupinus angustifolius]
TRINITY_DN9448_c0_g1	XP_019415451.1	PREDICTED: cytochrome P450 98A2 [Lupinus angustifolius] >OIV98052.1 hypothetical protein TanjilG_09545 [Lupinus angustifolius]
TRINITY_DN74893_c0_g1	XP_019452400.1	PREDICTED: cytochrome P450 CYP73A100-like [Lupinus angustifolius] >OIW06923.1 hypothetical protein TanjilG_18311 [Lupinus angustifolius]
TRINITY_DN20585_c0_g2	XP_019436905.1	PREDICTED: dihydroflavonol 4-reductase [Lupinus angustifolius] >OIW15617.1 hypothetical protein TanjilG_08193 [Lupinus angustifolius]
TRINITY_DN26383_c0_g1	XP_019436905.1	PREDICTED: dihydroflavonol 4-reductase [Lupinus angustifolius] >OIW15617.1 hypothetical protein TanjilG_08193 [Lupinus angustifolius]
TRINITY_DN70503_c0_g1	XP_019436905.1	PREDICTED: dihydroflavonol 4-reductase [Lupinus angustifolius] >OIW15617.1 hypothetical protein TanjilG_08193 [Lupinus angustifolius]
TRINITY_DN8917_c0_g1	XP_019436905.1	PREDICTED: dihydroflavonol 4-reductase [Lupinus angustifolius] >OIW15617.1 hypothetical protein TanjilG_08193 [Lupinus angustifolius]
TRINITY_DN2165_c0_g1	XP_019426839.1	PREDICTED: flavonoid 3',5'-hydroxylase 1-like [Lupinus angustifolius]
TRINITY_DN53477_c0_g1	XP_019446000.1	PREDICTED: flavonoid 3',5'-methyltransferase-like [Lupinus angustifolius]
TRINITY_DN4648_c0_g2	XP_019438864.1	PREDICTED: flavonoid 3'-monooxygenase [Lupinus angustifolius] >OIW19657.1 hypothetical protein TanjilG_18467 [Lupinus angustifolius]
TRINITY_DN4648_c0_g1	XP_019451686.1	PREDICTED: flavonoid 3'-monooxygenase-like isoform X1 [Lupinus angustifolius] >XP_019451692.1 PREDICTED: flavonoid 3'-monooxygenase-like isoform X2 [Lupinus angustifolius]
TRINITY_DN57578_c0_g1	XP_019457072.1	PREDICTED: flavonol synthase/flavanone 3-hydroxylase-like [Lupinus angustifolius]
TRINITY_DN18326_c0_g1	XP_019414966.1	PREDICTED: flavonol synthase/flavanone 3-hydroxylase-like [Lupinus angustifolius] >OIV97927.1 hypothetical protein TanjilG_12684 [Lupinus angustifolius]
TRINITY_DN84931_c0_g1	XP_019460312.1	PREDICTED: flavonol synthase/flavanone 3-hydroxylase-like [Lupinus angustifolius] >XP_019460313.1 PREDICTED: flavonol synthase/flavanone 3-hydroxylase-like [Lupinus angustifolius] >XP_019460314.1 PREDICTED: flavonol synthase/flavanone 3-hydroxylase-like [Lupinus angustifolius] >OIW02420.1 hypothetical protein TanjilG_05013 [Lupinus angustifolius]
TRINITY_DN90756_c0_g1	XP_019460312.1	PREDICTED: flavonol synthase/flavanone 3-hydroxylase-like [Lupinus angustifolius] >XP_019460313.1 PREDICTED: flavonol synthase/flavanone 3-hydroxylase-like [Lupinus angustifolius] >XP_019460314.1 PREDICTED: flavonol synthase/flavanone 3-hydroxylase-like [Lupinus angustifolius] >OIW02420.1 hypothetical protein TanjilG_05013 [Lupinus angustifolius]
TRINITY_DN33779_c1_g1	XP_019462554.1	PREDICTED: leucoanthocyanidin dioxygenase-like [Lupinus angustifolius] >OIW00838.1 hypothetical protein TanjilG_12242 [Lupinus angustifolius]
TRINITY_DN26664_c0_g1	XP_019413119.1	PREDICTED: leucoanthocyanidin dioxygenase-like [Lupinus angustifolius] >XP_019413120.1 PREDICTED: leucoanthocyanidin dioxygenase-like [Lupinus angustifolius] >OIV98611.1 hypothetical protein TanjilG_23050 [Lupinus angustifolius]
TRINITY_DN13692_c0_g2	XP_019423620.1	PREDICTED: leucoanthocyanidin dioxygenase-like isoform X1 [Lupinus angustifolius]
TRINITY_DN25842_c0_g1	XP_019423620.1	PREDICTED: leucoanthocyanidin dioxygenase-like isoform X1 [Lupinus angustifolius]
TRINITY_DN10437_c1_g1	XP_019423621.1	PREDICTED: leucoanthocyanidin dioxygenase-like isoform X2 [Lupinus angustifolius] >OIV92749.1 hypothetical protein TanjilG_00883 [Lupinus angustifolius]
TRINITY_DN91285_c0_g1	XP_019423621.1	PREDICTED: leucoanthocyanidin dioxygenase-like isoform X2 [Lupinus angustifolius] >OIV92749.1 hypothetical protein TanjilG_00883 [Lupinus angustifolius]
TRINITY_DN20248_c0_g1	XP_019454952.1	PREDICTED: leucoanthocyanidin reductase-like [Lupinus angustifolius] >OIW04651.1 hypothetical protein TanjilG_07786 [Lupinus angustifolius]
TRINITY_DN16688_c0_g1	XP_019451053.1	PREDICTED: malonyl-CoA:anthocyanidin 5-O-glucoside-6''-O-malonyltransferase-like [Lupinus angustifolius]
TRINITY_DN9476_c0_g1	XP_019457002.1	PREDICTED: malonyl-CoA:anthocyanidin 5-O-glucoside-6''-O-malonyltransferase-like [Lupinus angustifolius] >OIW05417.1 hypothetical protein TanjilG_23243 [Lupinus angustifolius]
TRINITY_DN27286_c0_g1	XP_019422848.1	PREDICTED: naringenin,2-oxoglutarate 3-dioxygenase-like [Lupinus angustifolius] >OIV93583.1 hypothetical protein TanjilG_04815 [Lupinus angustifolius]
TRINITY_DN76921_c0_g1	XP_019420370.1	PREDICTED: naringenin,2-oxoglutarate 3-dioxygenase-like [Lupinus angustifolius] >XP_019420371.1 PREDICTED: naringenin,2-oxoglutarate 3-dioxygenase-like [Lupinus angustifolius] >XP_019420372.1 PREDICTED: naringenin,2-oxoglutarate 3-dioxygenase-like [Lupinus angustifolius] >OIV94844.1 hypothetical protein TanjilG_22041 [Lupinus angustifolius]
TRINITY_DN17840_c0_g1	XP_019460360.1	PREDICTED: omega-hydroxypalmitate O-feruloyl transferase-like [Lupinus angustifolius] >OIW01287.1 hypothetical protein TanjilG_10448 [Lupinus angustifolius]
TRINITY_DN91504_c0_g1	XP_019460360.1	PREDICTED: omega-hydroxypalmitate O-feruloyl transferase-like [Lupinus angustifolius] >OIW01287.1 hypothetical protein TanjilG_10448 [Lupinus angustifolius]
TRINITY_DN4801_c0_g1	XP_019456490.1	PREDICTED: shikimate O-hydroxycinnamoyltransferase [Lupinus angustifolius]
TRINITY_DN66499_c0_g1	XP_019454506.1	PREDICTED: spermidine hydroxycinnamoyl transferase [Lupinus angustifolius] >OIW18691.1 hypothetical protein TanjilG_13443 [Lupinus angustifolius]
TRINITY_DN11265_c0_g1	XP_019412737.1	PREDICTED: spermidine hydroxycinnamoyl transferase-like [Lupinus angustifolius] >XP_019412744.1 PREDICTED: spermidine hydroxycinnamoyl transferase-like [Lupinus angustifolius] >OIW17629.1 hypothetical protein TanjilG_28979 [Lupinus angustifolius]
TRINITY_DN11265_c0_g2	XP_019412737.1	PREDICTED: spermidine hydroxycinnamoyl transferase-like [Lupinus angustifolius] >XP_019412744.1 PREDICTED: spermidine hydroxycinnamoyl transferase-like [Lupinus angustifolius] >OIW17629.1 hypothetical protein TanjilG_28979 [Lupinus angustifolius]
TRINITY_DN11265_c1_g1	XP_019412737.1	PREDICTED: spermidine hydroxycinnamoyl transferase-like [Lupinus angustifolius] >XP_019412744.1 PREDICTED: spermidine hydroxycinnamoyl transferase-like [Lupinus angustifolius] >OIW17629.1 hypothetical protein TanjilG_28979 [Lupinus angustifolius]
TRINITY_DN12118_c0_g1	XP_019412737.1	PREDICTED: spermidine hydroxycinnamoyl transferase-like [Lupinus angustifolius] >XP_019412744.1 PREDICTED: spermidine hydroxycinnamoyl transferase-like [Lupinus angustifolius] >OIW17629.1 hypothetical protein TanjilG_28979 [Lupinus angustifolius]
TRINITY_DN12118_c0_g2	XP_019412737.1	PREDICTED: spermidine hydroxycinnamoyl transferase-like [Lupinus angustifolius] >XP_019412744.1 PREDICTED: spermidine hydroxycinnamoyl transferase-like [Lupinus angustifolius] >OIW17629.1 hypothetical protein TanjilG_28979 [Lupinus angustifolius]
TRINITY_DN12118_c0_g3	XP_019412737.1	PREDICTED: spermidine hydroxycinnamoyl transferase-like [Lupinus angustifolius] >XP_019412744.1 PREDICTED: spermidine hydroxycinnamoyl transferase-like [Lupinus angustifolius] >OIW17629.1 hypothetical protein TanjilG_28979 [Lupinus angustifolius]
TRINITY_DN12118_c0_g4	XP_019412737.1	PREDICTED: spermidine hydroxycinnamoyl transferase-like [Lupinus angustifolius] >XP_019412744.1 PREDICTED: spermidine hydroxycinnamoyl transferase-like [Lupinus angustifolius] >OIW17629.1 hypothetical protein TanjilG_28979 [Lupinus angustifolius]
TRINITY_DN14683_c1_g1	XP_019412737.1	PREDICTED: spermidine hydroxycinnamoyl transferase-like [Lupinus angustifolius] >XP_019412744.1 PREDICTED: spermidine hydroxycinnamoyl transferase-like [Lupinus angustifolius] >OIW17629.1 hypothetical protein TanjilG_28979 [Lupinus angustifolius]
TRINITY_DN1509_c0_g1	XP_019412737.1	PREDICTED: spermidine hydroxycinnamoyl transferase-like [Lupinus angustifolius] >XP_019412744.1 PREDICTED: spermidine hydroxycinnamoyl transferase-like [Lupinus angustifolius] >OIW17629.1 hypothetical protein TanjilG_28979 [Lupinus angustifolius]
TRINITY_DN1509_c0_g2	XP_019412737.1	PREDICTED: spermidine hydroxycinnamoyl transferase-like [Lupinus angustifolius] >XP_019412744.1 PREDICTED: spermidine hydroxycinnamoyl transferase-like [Lupinus angustifolius] >OIW17629.1 hypothetical protein TanjilG_28979 [Lupinus angustifolius]
TRINITY_DN19991_c0_g1	XP_019412737.1	PREDICTED: spermidine hydroxycinnamoyl transferase-like [Lupinus angustifolius] >XP_019412744.1 PREDICTED: spermidine hydroxycinnamoyl transferase-like [Lupinus angustifolius] >OIW17629.1 hypothetical protein TanjilG_28979 [Lupinus angustifolius]
TRINITY_DN20549_c0_g1	XP_019412737.1	PREDICTED: spermidine hydroxycinnamoyl transferase-like [Lupinus angustifolius] >XP_019412744.1 PREDICTED: spermidine hydroxycinnamoyl transferase-like [Lupinus angustifolius] >OIW17629.1 hypothetical protein TanjilG_28979 [Lupinus angustifolius]
TRINITY_DN20862_c0_g1	XP_019412737.1	PREDICTED: spermidine hydroxycinnamoyl transferase-like [Lupinus angustifolius] >XP_019412744.1 PREDICTED: spermidine hydroxycinnamoyl transferase-like [Lupinus angustifolius] >OIW17629.1 hypothetical protein TanjilG_28979 [Lupinus angustifolius]
TRINITY_DN20916_c0_g1	XP_019412737.1	PREDICTED: spermidine hydroxycinnamoyl transferase-like [Lupinus angustifolius] >XP_019412744.1 PREDICTED: spermidine hydroxycinnamoyl transferase-like [Lupinus angustifolius] >OIW17629.1 hypothetical protein TanjilG_28979 [Lupinus angustifolius]
TRINITY_DN20916_c1_g1	XP_019412737.1	PREDICTED: spermidine hydroxycinnamoyl transferase-like [Lupinus angustifolius] >XP_019412744.1 PREDICTED: spermidine hydroxycinnamoyl transferase-like [Lupinus angustifolius] >OIW17629.1 hypothetical protein TanjilG_28979 [Lupinus angustifolius]
TRINITY_DN20916_c1_g2	XP_019412737.1	PREDICTED: spermidine hydroxycinnamoyl transferase-like [Lupinus angustifolius] >XP_019412744.1 PREDICTED: spermidine hydroxycinnamoyl transferase-like [Lupinus angustifolius] >OIW17629.1 hypothetical protein TanjilG_28979 [Lupinus angustifolius]
TRINITY_DN22129_c0_g1	XP_019412737.1	PREDICTED: spermidine hydroxycinnamoyl transferase-like [Lupinus angustifolius] >XP_019412744.1 PREDICTED: spermidine hydroxycinnamoyl transferase-like [Lupinus angustifolius] >OIW17629.1 hypothetical protein TanjilG_28979 [Lupinus angustifolius]
TRINITY_DN22129_c0_g2	XP_019412737.1	PREDICTED: spermidine hydroxycinnamoyl transferase-like [Lupinus angustifolius] >XP_019412744.1 PREDICTED: spermidine hydroxycinnamoyl transferase-like [Lupinus angustifolius] >OIW17629.1 hypothetical protein TanjilG_28979 [Lupinus angustifolius]
TRINITY_DN22129_c0_g4	XP_019412737.1	PREDICTED: spermidine hydroxycinnamoyl transferase-like [Lupinus angustifolius] >XP_019412744.1 PREDICTED: spermidine hydroxycinnamoyl transferase-like [Lupinus angustifolius] >OIW17629.1 hypothetical protein TanjilG_28979 [Lupinus angustifolius]
TRINITY_DN22129_c0_g5	XP_019412737.1	PREDICTED: spermidine hydroxycinnamoyl transferase-like [Lupinus angustifolius] >XP_019412744.1 PREDICTED: spermidine hydroxycinnamoyl transferase-like [Lupinus angustifolius] >OIW17629.1 hypothetical protein TanjilG_28979 [Lupinus angustifolius]
TRINITY_DN33344_c0_g1	XP_019412737.1	PREDICTED: spermidine hydroxycinnamoyl transferase-like [Lupinus angustifolius] >XP_019412744.1 PREDICTED: spermidine hydroxycinnamoyl transferase-like [Lupinus angustifolius] >OIW17629.1 hypothetical protein TanjilG_28979 [Lupinus angustifolius]
TRINITY_DN36619_c0_g1	XP_019412737.1	PREDICTED: spermidine hydroxycinnamoyl transferase-like [Lupinus angustifolius] >XP_019412744.1 PREDICTED: spermidine hydroxycinnamoyl transferase-like [Lupinus angustifolius] >OIW17629.1 hypothetical protein TanjilG_28979 [Lupinus angustifolius]
TRINITY_DN36619_c1_g1	XP_019412737.1	PREDICTED: spermidine hydroxycinnamoyl transferase-like [Lupinus angustifolius] >XP_019412744.1 PREDICTED: spermidine hydroxycinnamoyl transferase-like [Lupinus angustifolius] >OIW17629.1 hypothetical protein TanjilG_28979 [Lupinus angustifolius]
TRINITY_DN4853_c0_g1	XP_019412737.1	PREDICTED: spermidine hydroxycinnamoyl transferase-like [Lupinus angustifolius] >XP_019412744.1 PREDICTED: spermidine hydroxycinnamoyl transferase-like [Lupinus angustifolius] >OIW17629.1 hypothetical protein TanjilG_28979 [Lupinus angustifolius]
TRINITY_DN4853_c1_g1	XP_019412737.1	PREDICTED: spermidine hydroxycinnamoyl transferase-like [Lupinus angustifolius] >XP_019412744.1 PREDICTED: spermidine hydroxycinnamoyl transferase-like [Lupinus angustifolius] >OIW17629.1 hypothetical protein TanjilG_28979 [Lupinus angustifolius]
TRINITY_DN4853_c1_g2	XP_019412737.1	PREDICTED: spermidine hydroxycinnamoyl transferase-like [Lupinus angustifolius] >XP_019412744.1 PREDICTED: spermidine hydroxycinnamoyl transferase-like [Lupinus angustifolius] >OIW17629.1 hypothetical protein TanjilG_28979 [Lupinus angustifolius]
TRINITY_DN4853_c1_g3	XP_019412737.1	PREDICTED: spermidine hydroxycinnamoyl transferase-like [Lupinus angustifolius] >XP_019412744.1 PREDICTED: spermidine hydroxycinnamoyl transferase-like [Lupinus angustifolius] >OIW17629.1 hypothetical protein TanjilG_28979 [Lupinus angustifolius]
TRINITY_DN5646_c0_g1	XP_019412737.1	PREDICTED: spermidine hydroxycinnamoyl transferase-like [Lupinus angustifolius] >XP_019412744.1 PREDICTED: spermidine hydroxycinnamoyl transferase-like [Lupinus angustifolius] >OIW17629.1 hypothetical protein TanjilG_28979 [Lupinus angustifolius]
TRINITY_DN78259_c0_g1	XP_019412737.1	PREDICTED: spermidine hydroxycinnamoyl transferase-like [Lupinus angustifolius] >XP_019412744.1 PREDICTED: spermidine hydroxycinnamoyl transferase-like [Lupinus angustifolius] >OIW17629.1 hypothetical protein TanjilG_28979 [Lupinus angustifolius]
TRINITY_DN567_c0_g1	XP_019432343.1	PREDICTED: trans-cinnamate 4-monooxygenase [Lupinus angustifolius]
TRINITY_DN35838_c0_g1	XP_019451817.1	PREDICTED: vinorine synthase-like [Lupinus angustifolius] >OIW06325.1 hypothetical protein TanjilG_14970 [Lupinus angustifolius]
TRINITY_DN64732_c0_g1	XP_019438324.1	PREDICTED: vinorine synthase-like [Lupinus angustifolius] >OIW14649.1 hypothetical protein TanjilG_32991 [Lupinus angustifolius]
TRINITY_DN72481_c0_g1	XP_019438324.1	PREDICTED: vinorine synthase-like [Lupinus angustifolius] >OIW14649.1 hypothetical protein TanjilG_32991 [Lupinus angustifolius]
TRINITY_DN22770_c1_g1	XP_021643187.1	trans-cinnamate 4-monooxygenase-like [Hevea brasiliensis]
Carotenoid-related genes
TRINITY_DN10140_c0_g1	XP_019438290.1	PREDICTED: 15-cis-zeta-carotene isomerase, chloroplastic-like [Lupinus angustifolius] >OIW14673.1 hypothetical protein TanjilG_33015 [Lupinus angustifolius]
TRINITY_DN10586_c0_g1	XP_019462498.1	PREDICTED: 9-cis-epoxycarotenoid dioxygenase NCED3, chloroplastic-like [Lupinus angustifolius] >OIW00653.1 hypothetical protein TanjilG_09134 [Lupinus angustifolius]
TRINITY_DN11947_c0_g1	XP_019422174.1	PREDICTED: abscisate beta-glucosyltransferase-like [Lupinus angustifolius] >OIV94299.1 hypothetical protein TanjilG_19305 [Lupinus angustifolius]
TRINITY_DN12577_c0_g1	XP_019464984.1	PREDICTED: zeaxanthin epoxidase, chloroplastic-like isoform X1 [Lupinus angustifolius]
TRINITY_DN1330_c0_g1	OIW11652.1	hypothetical protein TanjilG_24858 [Lupinus angustifolius]
TRINITY_DN14260_c0_g1	XP_019429423.1	PREDICTED: protein LUTEIN DEFICIENT 5, chloroplastic [Lupinus angustifolius] >OIW17878.1 hypothetical protein TanjilG_00235 [Lupinus angustifolius]
TRINITY_DN14432_c0_g2	XP_019423957.1	PREDICTED: probable carotenoid cleavage dioxygenase 4, chloroplastic [Lupinus angustifolius] >OIV92912.1 hypothetical protein TanjilG_00089 [Lupinus angustifolius]
TRINITY_DN14729_c1_g1	XP_007139647.1	hypothetical protein PHAVU_008G047400g, partial [Phaseolus vulgaris] >ESW11641.1 hypothetical protein PHAVU_008G047400g, partial [Phaseolus vulgaris]
TRINITY_DN15305_c0_g1	XP_019442123.1	PREDICTED: beta-carotene hydroxylase 2, chloroplastic-like [Lupinus angustifolius] >OIW12530.1 hypothetical protein TanjilG_04694 [Lupinus angustifolius]
TRINITY_DN17418_c0_g1	XP_019432581.1	PREDICTED: phytoene synthase 2, chloroplastic-like [Lupinus angustifolius] >XP_019432587.1 PREDICTED: phytoene synthase 2, chloroplastic-like [Lupinus angustifolius] >OIW16120.1 hypothetical protein TanjilG_18835 [Lupinus angustifolius]
TRINITY_DN1792_c0_g1	XP_019426413.1	PREDICTED: 9-cis-epoxycarotenoid dioxygenase NCED1, chloroplastic-like isoform X3 [Lupinus angustifolius]
TRINITY_DN21023_c0_g1	XP_019460948.1	PREDICTED: phytoene synthase 2, chloroplastic-like [Lupinus angustifolius] >XP_019460949.1 PREDICTED: phytoene synthase 2, chloroplastic-like [Lupinus angustifolius] >XP_019460950.1 PREDICTED: phytoene synthase 2, chloroplastic-like [Lupinus angustifolius] >XP_019460951.1 PREDICTED: phytoene synthase 2, chloroplastic-like [Lupinus angustifolius] >OIW02629.1 hypothetical protein TanjilG_24080 [Lup…
TRINITY_DN21023_c0_g2	QCI61139.1	Phytoene synthase [Crocus sativus]
TRINITY_DN2183_c0_g1	OIV95036.1	hypothetical protein TanjilG_10856 [Lupinus angustifolius]
TRINITY_DN22499_c0_g1	OIW16251.1	hypothetical protein TanjilG_18966 [Lupinus angustifolius]
TRINITY_DN22793_c0_g1	XP_019426193.1	PREDICTED: carotenoid 9,10(9',10')-cleavage dioxygenase 1-like isoform X1 [Lupinus angustifolius]
TRINITY_DN23110_c0_g1	XP_019460948.1	PREDICTED: phytoene synthase 2, chloroplastic-like [Lupinus angustifolius] >XP_019460949.1 PREDICTED: phytoene synthase 2, chloroplastic-like [Lupinus angustifolius] >XP_019460950.1 PREDICTED: phytoene synthase 2, chloroplastic-like [Lupinus angustifolius] >XP_019460951.1 PREDICTED: phytoene synthase 2, chloroplastic-like [Lupinus angustifolius] >OIW02629.1 hypothetical protein TanjilG_24080 [Lup…
TRINITY_DN24239_c0_g1	XP_019445783.1	PREDICTED: abscisic acid 8'-hydroxylase 4-like [Lupinus angustifolius] >OIW10184.1 hypothetical protein TanjilG_27935 [Lupinus angustifolius]
TRINITY_DN24400_c0_g1	XP_019455868.1	PREDICTED: indole-3-acetaldehyde oxidase-like isoform X1 [Lupinus angustifolius] >OIW04149.1 hypothetical protein TanjilG_00709 [Lupinus angustifolius]
TRINITY_DN24922_c0_g1	OIW16251.1	hypothetical protein TanjilG_18966 [Lupinus angustifolius]
TRINITY_DN24969_c0_g1	GAY67519.1	hypothetical protein CUMW_257150 [Citrus unshiu]
TRINITY_DN25180_c0_g1	XP_019420671.1	PREDICTED: abscisic acid 8'-hydroxylase 2 isoform X2 [Lupinus angustifolius]
TRINITY_DN25962_c0_g1	XP_019428050.1	PREDICTED: prolycopene isomerase, chloroplastic [Lupinus angustifolius] >XP_019428051.1 PREDICTED: prolycopene isomerase, chloroplastic [Lupinus angustifolius]
TRINITY_DN26894_c0_g1	XP_019436954.1	PREDICTED: abscisic acid 8'-hydroxylase 4-like [Lupinus angustifolius]
TRINITY_DN27293_c0_g1	GAY67519.1	hypothetical protein CUMW_257150 [Citrus unshiu]
TRINITY_DN28303_c0_g1	XP_028209027.1	abscisic acid 8'-hydroxylase CYP707A1-like [Glycine soja] >RZB58458.1 Abscisic acid 8'-hydroxylase 4 isoform A [Glycine soja]
TRINITY_DN2866_c0_g1	XP_019451984.1	PREDICTED: beta-carotene 3-hydroxylase 1, chloroplastic-like [Lupinus angustifolius]
TRINITY_DN31269_c0_g1	XP_019461800.1	PREDICTED: carotene epsilon-monooxygenase, chloroplastic [Lupinus angustifolius] >OIW01576.1 hypothetical protein TanjilG_21156 [Lupinus angustifolius]
TRINITY_DN31289_c0_g1	XP_019432245.1	PREDICTED: carotenoid cleavage dioxygenase 8 homolog B, chloroplastic [Lupinus angustifolius] >OIW21061.1 hypothetical protein TanjilG_28507 [Lupinus angustifolius]
TRINITY_DN31366_c0_g1	XP_019455868.1	PREDICTED: indole-3-acetaldehyde oxidase-like isoform X1 [Lupinus angustifolius] >OIW04149.1 hypothetical protein TanjilG_00709 [Lupinus angustifolius]
TRINITY_DN31366_c1_g1	OIW16251.1	hypothetical protein TanjilG_18966 [Lupinus angustifolius]
TRINITY_DN31957_c0_g1	XP_019423957.1	PREDICTED: probable carotenoid cleavage dioxygenase 4, chloroplastic [Lupinus angustifolius] >OIV92912.1 hypothetical protein TanjilG_00089 [Lupinus angustifolius]
TRINITY_DN31957_c0_g2	XP_019423957.1	PREDICTED: probable carotenoid cleavage dioxygenase 4, chloroplastic [Lupinus angustifolius] >OIV92912.1 hypothetical protein TanjilG_00089 [Lupinus angustifolius]
TRINITY_DN32343_c0_g1	OIW16251.1	hypothetical protein TanjilG_18966 [Lupinus angustifolius]
TRINITY_DN33671_c0_g1	XP_019435350.1	PREDICTED: phytoene synthase 2, chloroplastic-like [Lupinus angustifolius] >OIW22018.1 hypothetical protein TanjilG_29207 [Lupinus angustifolius]
TRINITY_DN34002_c0_g1	XP_022634034.1	abscisic acid 8'-hydroxylase 1-like isoform X1 [Vigna radiata var. radiata]
TRINITY_DN34396_c0_g1	AHI87686.1	zeaxanthin epoxidase [Lupinus luteus]
TRINITY_DN34734_c0_g2	XP_019421453.1	PREDICTED: abscisic acid 8'-hydroxylase 1-like isoform X2 [Lupinus angustifolius] >OIV94398.1 hypothetical protein TanjilG_25460 [Lupinus angustifolius]
TRINITY_DN36153_c0_g1	XP_019455868.1	PREDICTED: indole-3-acetaldehyde oxidase-like isoform X1 [Lupinus angustifolius] >OIW04149.1 hypothetical protein TanjilG_00709 [Lupinus angustifolius]
TRINITY_DN3775_c0_g1	XP_019453327.1	PREDICTED: zeta-carotene desaturase, chloroplastic/chromoplastic-like [Lupinus angustifolius] >OIW07145.1 hypothetical protein TanjilG_10118 [Lupinus angustifolius]
TRINITY_DN4021_c0_g1	XP_019443971.1	PREDICTED: zeaxanthin epoxidase, chloroplastic-like [Lupinus angustifolius] >OIW19302.1 hypothetical protein TanjilG_24341 [Lupinus angustifolius]
TRINITY_DN422_c0_g1	XP_019423658.1	PREDICTED: abscisic acid 8'-hydroxylase 3-like [Lupinus angustifolius] >OIV92921.1 hypothetical protein TanjilG_20583 [Lupinus angustifolius]
TRINITY_DN45786_c1_g1	XP_019429423.1	PREDICTED: protein LUTEIN DEFICIENT 5, chloroplastic [Lupinus angustifolius] >OIW17878.1 hypothetical protein TanjilG_00235 [Lupinus angustifolius]
TRINITY_DN46863_c0_g1	XP_019421453.1	PREDICTED: abscisic acid 8'-hydroxylase 1-like isoform X2 [Lupinus angustifolius] >OIV94398.1 hypothetical protein TanjilG_25460 [Lupinus angustifolius]
TRINITY_DN47671_c0_g1	OIW16251.1	hypothetical protein TanjilG_18966 [Lupinus angustifolius]
TRINITY_DN47784_c0_g1	XP_019453327.1	PREDICTED: zeta-carotene desaturase, chloroplastic/chromoplastic-like [Lupinus angustifolius] >OIW07145.1 hypothetical protein TanjilG_10118 [Lupinus angustifolius]
TRINITY_DN47784_c0_g2	XP_022746823.1	zeta-carotene desaturase, chloroplastic/chromoplastic-like [Durio zibethinus]
TRINITY_DN49754_c0_g1	KEH43037.1	zeta-carotene desaturase [Medicago truncatula]
TRINITY_DN52272_c0_g1	XP_019460948.1	PREDICTED: phytoene synthase 2, chloroplastic-like [Lupinus angustifolius] >XP_019460949.1 PREDICTED: phytoene synthase 2, chloroplastic-like [Lupinus angustifolius] >XP_019460950.1 PREDICTED: phytoene synthase 2, chloroplastic-like [Lupinus angustifolius] >XP_019460951.1 PREDICTED: phytoene synthase 2, chloroplastic-like [Lupinus angustifolius] >OIW02629.1 hypothetical protein TanjilG_24080 [Lup…
TRINITY_DN53986_c0_g1	XP_019427658.1	PREDICTED: xanthoxin dehydrogenase [Lupinus angustifolius] >OIW16891.1 hypothetical protein TanjilG_01756 [Lupinus angustifolius]
TRINITY_DN53986_c0_g2	XP_019427658.1	PREDICTED: xanthoxin dehydrogenase [Lupinus angustifolius] >OIW16891.1 hypothetical protein TanjilG_01756 [Lupinus angustifolius]
TRINITY_DN5432_c0_g1	XP_019423349.1	PREDICTED: zeaxanthin epoxidase, chloroplastic-like [Lupinus angustifolius] >OIV92875.1 hypothetical protein TanjilG_01009 [Lupinus angustifolius]
TRINITY_DN5456_c0_g1	XP_019458547.1	PREDICTED: lycopene beta cyclase, chloroplastic/chromoplastic [Lupinus angustifolius] >OIW03180.1 hypothetical protein TanjilG_11817 [Lupinus angustifolius]
TRINITY_DN57077_c0_g1	XP_019455869.1	PREDICTED: indole-3-acetaldehyde oxidase-like isoform X2 [Lupinus angustifolius]
TRINITY_DN5724_c0_g2	XP_019437811.1	PREDICTED: capsanthin/capsorubin synthase, chromoplastic-like [Lupinus angustifolius] >OIW14965.1 hypothetical protein TanjilG_30684 [Lupinus angustifolius]
TRINITY_DN57272_c0_g1	XP_019453327.1	PREDICTED: zeta-carotene desaturase, chloroplastic/chromoplastic-like [Lupinus angustifolius] >OIW07145.1 hypothetical protein TanjilG_10118 [Lupinus angustifolius]
TRINITY_DN5998_c0_g1	XP_019438286.1	PREDICTED: phytoene dehydrogenase, chloroplastic/chromoplastic-like [Lupinus angustifolius]
TRINITY_DN62033_c0_g1	KYP48364.1	hypothetical protein KK1_029976 [Cajanus cajan]
TRINITY_DN62847_c0_g1	XP_019417646.1	PREDICTED: lycopene epsilon cyclase, chloroplastic [Lupinus angustifolius]
TRINITY_DN65474_c0_g1	XP_004142522.1	PREDICTED: zeta-carotene desaturase, chloroplastic/chromoplastic [Cucumis sativus] >KGN66802.1 hypothetical protein Csa_1G695370 [Cucumis sativus]
TRINITY_DN65937_c0_g2	RZC26493.1	Phytoene synthase, chloroplastic isoform F [Glycine soja]
TRINITY_DN660_c0_g1	XP_019460948.1	PREDICTED: phytoene synthase 2, chloroplastic-like [Lupinus angustifolius] >XP_019460949.1 PREDICTED: phytoene synthase 2, chloroplastic-like [Lupinus angustifolius] >XP_019460950.1 PREDICTED: phytoene synthase 2, chloroplastic-like [Lupinus angustifolius] >XP_019460951.1 PREDICTED: phytoene synthase 2, chloroplastic-like [Lupinus angustifolius] >OIW02629.1 hypothetical protein TanjilG_24080 [Lup…
TRINITY_DN68140_c0_g1	XP_019429423.1	PREDICTED: protein LUTEIN DEFICIENT 5, chloroplastic [Lupinus angustifolius] >OIW17878.1 hypothetical protein TanjilG_00235 [Lupinus angustifolius]
TRINITY_DN68164_c0_g1	THU73015.1	hypothetical protein C4D60_Mb04t18340 [Musa balbisiana]
TRINITY_DN6824_c0_g1	XP_019461800.1	PREDICTED: carotene epsilon-monooxygenase, chloroplastic [Lupinus angustifolius] >OIW01576.1 hypothetical protein TanjilG_21156 [Lupinus angustifolius]
TRINITY_DN68393_c0_g1	BAT32878.1	carotenoid cleavage dioxygenase 1 [Rhododendron japonicum f. flavum]
TRINITY_DN70022_c0_g1	KYP75657.1	hypothetical protein KK1_019850 [Cajanus cajan]
TRINITY_DN70205_c0_g1	XP_012851538.1	PREDICTED: 9-cis-epoxycarotenoid dioxygenase NCED6, chloroplastic-like [Erythranthe guttata]
TRINITY_DN71123_c0_g1	ACE79169.1	zeta carotene desaturase [Citrus maxima]
TRINITY_DN71123_c0_g2	XP_028184497.1	zeta-carotene desaturase, chloroplastic/chromoplastic-like [Glycine soja] >KHN16183.1 Zeta-carotene desaturase, chloroplastic/chromoplastic [Glycine soja] >RZB87516.1 Zeta-carotene desaturase, chloroplastic/chromoplastic [Glycine soja]
TRINITY_DN8467_c0_g1	XP_019449691.1	PREDICTED: beta-carotene 3-hydroxylase 1, chloroplastic-like [Lupinus angustifolius]
TRINITY_DN86453_c0_g1	XP_019453435.1	PREDICTED: carotenoid 9,10(9',10')-cleavage dioxygenase 1-like [Lupinus angustifolius] >XP_019453436.1 PREDICTED: carotenoid 9,10(9',10')-cleavage dioxygenase 1-like [Lupinus angustifolius]
TRINITY_DN8783_c0_g1	XP_019453123.1	PREDICTED: beta-carotene isomerase D27, chloroplastic-like isoform X1 [Lupinus angustifolius] >XP_019453124.1 PREDICTED: beta-carotene isomerase D27, chloroplastic-like isoform X1 [Lupinus angustifolius] >XP_019453125.1 PREDICTED: beta-carotene isomerase D27, chloroplastic-like isoform X1 [Lupinus angustifolius] >OIW06731.1 hypothetical protein TanjilG_11456 [Lupinus angustifolius]
TRINITY_DN8942_c0_g1	XP_019455868.1	PREDICTED: indole-3-acetaldehyde oxidase-like isoform X1 [Lupinus angustifolius] >OIW04149.1 hypothetical protein TanjilG_00709 [Lupinus angustifolius]
TRINITY_DN8942_c2_g1	XP_019455868.1	PREDICTED: indole-3-acetaldehyde oxidase-like isoform X1 [Lupinus angustifolius] >OIW04149.1 hypothetical protein TanjilG_00709 [Lupinus angustifolius]
TRINITY_DN9293_c0_g1	XP_019415584.1	PREDICTED: phytoene dehydrogenase, chloroplastic/chromoplastic isoform X2 [Lupinus angustifolius]
