# Supplementary material for: Comparative transcriptome analysis of Lupinus polyphyllus Lindl. provides a rich molecular resource for research on coloration mechanism
Source: PeerJ. 2022 Aug 2;10:e13836. doi: 10.7717/peerj.13836 (PMC9354738; doi:10.7717/peerj.13836)
Supplement: Supplemental Information 8 — The FPKM value in 8 colors and functional annotation information of unigenes that showed expressional differences in one or more comparison groups [file peerj-10-13836-s008.xlsx]

## Sheet: Sheet1
Supplementary Table 7 The expression level analysis. The FPKM value in 8 colors and functional annotation information of unigenes that showed expressional differences in one or more comparison groups
6 carotenoid-related genes	PIK	PKW	PUL	PWH	PYH	RED	WHT	YEL	nr_description
TRINITY_DN1792_c0_g1	1.1167	1.6633	2.2667	2.1833	1.6967	6.1033	0.9333	40.6933	PREDICTED: 9-cis-epoxycarotenoid dioxygenase NCED1, chloroplastic-like isoform X3 [Lupinus angustifolius]
TRINITY_DN2866_c0_g1	295.31	226.587	70.9333	211.547	335.277	213.393	115.033	194.397	PREDICTED: beta-carotene 3-hydroxylase 1, chloroplastic-like [Lupinus angustifolius]
TRINITY_DN52272_c0_g1	12.21	44.9933	10.2267	13.02	27.6167	12.8567	4.4033	17.57	PREDICTED: phytoene synthase 2, chloroplastic-like [Lupinus angustifolius] >XP_019460949.1 PREDICTED: phytoene synthase 2, chloroplastic-like [Lupinus angustifolius] >XP_019460950.1 PREDICTED: phytoene synthase 2, chloroplastic-like [Lupinus angustifolius] >XP_019460951.1 PREDICTED: phytoene synthase 2, chloroplastic-like [Lupinus angustifolius] >OIW02629.1 hypothetical protein TanjilG_24080 [Lup…
TRINITY_DN5432_c0_g1	596.83	311.597	327.94	291.08	702.357	276.22	178.123	365.02	PREDICTED: zeaxanthin epoxidase, chloroplastic-like [Lupinus angustifolius] >OIV92875.1 hypothetical protein TanjilG_01009 [Lupinus angustifolius]
TRINITY_DN71123_c0_g1	8.2633	5.49	0.33	5.8133	0.47	2.2467	0.69	0.7633	zeta carotene desaturase [Citrus maxima]
TRINITY_DN8467_c0_g1	53.33	24.1633	11.58	13.32	49.7433	22.1633	25.8967	13.53	PREDICTED: beta-carotene 3-hydroxylase 1, chloroplastic-like [Lupinus angustifolius]
23 anthocyanin-related genes
TRINITY_DN13380_c0_g1	1.05	3.91	0.0333	0	0	0	7.3167	0.3567	chalcone synthase, partial [Stenopetalum velutinum]
TRINITY_DN13692_c0_g2	0.25	0.3267	0	0.2467	0.59	0.4933	0.1467	0.4567	PREDICTED: leucoanthocyanidin dioxygenase-like isoform X1 [Lupinus angustifolius]
TRINITY_DN16688_c0_g1	133.657	148.737	78.9367	85.8333	89.13	39.56	207.227	63.5467	PREDICTED: malonyl-CoA:anthocyanidin 5-O-glucoside-6''-O-malonyltransferase-like [Lupinus angustifolius]
TRINITY_DN18326_c0_g1	24.76	3.8167	0.5733	4.3533	6.6467	4.6467	26.8267	3.3767	PREDICTED: flavonol synthase/flavanone 3-hydroxylase-like [Lupinus angustifolius] >OIV97927.1 hypothetical protein TanjilG_12684 [Lupinus angustifolius]
TRINITY_DN18889_c0_g1	1.42	11.2433	12.5067	7.9567	4.3733	15.1167	6.9167	10.2533	PREDICTED: anthocyanidin 3-O-glucoside 2''-O-glucosyltransferase-like [Lupinus angustifolius] >OIW15451.1 hypothetical protein TanjilG_28650 [Lupinus angustifolius]
TRINITY_DN20248_c0_g1	2.0467	0.6033	0	0.09	0.29	0.11	1.42	0.8333	PREDICTED: leucoanthocyanidin reductase-like [Lupinus angustifolius] >OIW04651.1 hypothetical protein TanjilG_07786 [Lupinus angustifolius]
TRINITY_DN20585_c0_g2	1.1867	2.9133	2.2667	0.9333	1.41	0.2133	6.9833	5.0467	PREDICTED: dihydroflavonol 4-reductase [Lupinus angustifolius] >OIW15617.1 hypothetical protein TanjilG_08193 [Lupinus angustifolius]
TRINITY_DN26383_c0_g1	48.4433	26.5867	25.4167	8.49	5.9667	5.2167	24.1967	14.12	PREDICTED: dihydroflavonol 4-reductase [Lupinus angustifolius] >OIW15617.1 hypothetical protein TanjilG_08193 [Lupinus angustifolius]
TRINITY_DN29598_c0_g1	579.21	391.43	380.31	137.09	154.187	288.463	378.107	334.533	chalcone synthase, partial [Lupinus luteus]
TRINITY_DN29758_c0_g1	0.08	0.4533	1.0633	0.2767	0.7133	0.9167	0.6933	0.3033	PREDICTED: chalcone--flavonone isomerase 2-like [Lupinus angustifolius] >OIW12778.1 hypothetical protein TanjilG_24711 [Lupinus angustifolius]
TRINITY_DN3238_c0_g2	4.6767	9.1933	0.2833	2.7067	11.1367	3.6233	0.1833	4.29	PREDICTED: anthocyanidin reductase ((2S
TRINITY_DN4648_c0_g1	7.2167	24.33	48.0167	7.1433	10.6867	17.5967	44.4467	40.25	PREDICTED: flavonoid 3'-monooxygenase-like isoform X1 [Lupinus angustifolius] >XP_019451692.1 PREDICTED: flavonoid 3'-monooxygenase-like isoform X2 [Lupinus angustifolius]
TRINITY_DN52252_c0_g1	0.0433	0.3667	0.36	1.78	0.0267	0.14	0.0867	0.1233	PREDICTED: anthocyanidin reductase ((2S
TRINITY_DN53477_c0_g1	0.0667	0.3033	0.1033	0.08	0.0833	0.02	1.1233	0.51	PREDICTED: flavonoid 3',5'-methyltransferase-like [Lupinus angustifolius]
TRINITY_DN6806_c0_g1	4.46	13.1467	22.4267	6.0333	9.16	6.05	22.52	13.4333	PREDICTED: anthocyanidin 3-O-glucosyltransferase 2-like [Lupinus angustifolius] >OIW02447.1 hypothetical protein TanjilG_05040 [Lupinus angustifolius]
TRINITY_DN7044_c1_g1	150.447	188.23	43.6067	114.7	315.04	120.147	18.6	112.703	PREDICTED: anthocyanidin reductase ((2S
TRINITY_DN7234_c0_g1	258.913	85.2733	32.76	29.2933	42.3067	37.2433	246.22	100.163	PREDICTED: chalcone synthase isoform X1 [Lupinus angustifolius] >XP_019427417.1 PREDICTED: chalcone synthase isoform X2 [Lupinus angustifolius] >OIV90046.1 hypothetical protein TanjilG_21178 [Lupinus angustifolius]
TRINITY_DN86889_c0_g1	8.4633	9.3767	8.7633	4.8833	5.4033	0	14.1733	10.32	cinnamate 4-hydroxylase [Epimedium sagittatum]
TRINITY_DN8917_c0_g1	871.947	341.657	322.197	212.38	223.86	407.97	1008.34	348.977	PREDICTED: dihydroflavonol 4-reductase [Lupinus angustifolius] >OIW15617.1 hypothetical protein TanjilG_08193 [Lupinus angustifolius]
TRINITY_DN91285_c0_g1	238.193	152.363	3.35	29.1633	0.2667	26.7267	330.637	1.5967	PREDICTED: leucoanthocyanidin dioxygenase-like isoform X2 [Lupinus angustifolius] >OIV92749.1 hypothetical protein TanjilG_00883 [Lupinus angustifolius]
TRINITY_DN9240_c0_g1	1.8567	1.4767	2.9067	1.3	1.1633	0.6733	3.2867	4.8533	PREDICTED: coumaroyl-CoA:anthocyanidin 3-O-glucoside-6''-O-coumaroyltransferase 1-like [Lupinus angustifolius] >OIV96750.1 hypothetical protein TanjilG_11746 [Lupinus angustifolius]
TRINITY_DN9476_c0_g1	2.4767	1.9467	14.5733	1.7567	2.1233	10.37	5.2067	5.04	PREDICTED: malonyl-CoA:anthocyanidin 5-O-glucoside-6''-O-malonyltransferase-like [Lupinus angustifolius] >OIW05417.1 hypothetical protein TanjilG_23243 [Lupinus angustifolius]
TRINITY_DN9537_c0_g1	253.993	225.243	69.3633	85.2133	92.79	107.587	336.71	74.5267	PREDICTED: anthocyanidin 3-O-glucosyltransferase 7-like [Lupinus angustifolius] >OIW22010.1 hypothetical protein TanjilG_28669 [Lupinus angustifolius]
79 TFs genes
TRINITY_DN12034_c0_g1	1.1	4.25	4.3933	4.2733	2.4	4.8967	3.26	3.5367	PREDICTED: protein ODORANT1 isoform X2 [Lupinus angustifolius] >OIW20964.1 hypothetical protein TanjilG_26676 [Lupinus angustifolius]
TRINITY_DN12398_c0_g2	3.4	2.01	2.8233	2.1167	3.2933	1.35	0.8967	3.8433	PREDICTED: transcription repressor KAN1-like [Lupinus angustifolius] >OIW19235.1 hypothetical protein TanjilG_20360 [Lupinus angustifolius]
TRINITY_DN12398_c0_g3	0.0167	0.5267	0.6933	0.6333	0.2767	0.3267	0.3833	0.2567	PREDICTED: uncharacterized protein LOC109360552 [Lupinus angustifolius] >OIW17962.1 hypothetical protein TanjilG_17798 [Lupinus angustifolius]
TRINITY_DN12399_c0_g1	0.4033	0.22	0.3033	0.7067	0.4933	0.1767	3.5867	1.56	PREDICTED: myb-related protein B-like isoform X1 [Lupinus angustifolius]
TRINITY_DN13383_c0_g2	0.55	0.3933	4.3367	0.4633	0.6567	1.2833	0.87	3.1733	PREDICTED: NAC domain-containing protein 100-like isoform X1 [Lupinus angustifolius] >OIW03329.1 hypothetical protein TanjilG_03438 [Lupinus angustifolius]
TRINITY_DN13792_c0_g2	2.3733	3.5733	0.5767	0.9167	1.3967	0.98	5.88	3.05	PREDICTED: myb-related protein 330-like [Lupinus angustifolius]
TRINITY_DN14866_c0_g1	0.4167	0.8433	6.5233	0.33	0.17	0.8967	3.3067	5.09	PREDICTED: transcription factor bHLH3 isoform X2 [Lupinus angustifolius] >XP_019456242.1 PREDICTED: transcription factor bHLH3 isoform X2 [Lupinus angustifolius] >OIW05032.1 hypothetical protein TanjilG_18631 [Lupinus angustifolius]
TRINITY_DN14968_c0_g1	0.42	1.23	2.85	1.2533	0.6933	1.8867	0.22	0.8967	hypothetical protein TanjilG_30575 [Lupinus angustifolius] >OIW14859.1 hypothetical protein TanjilG_30578 [Lupinus angustifolius]
TRINITY_DN14968_c1_g1	0.1133	0.44	1.7133	1.3067	0.11	0.5367	0.5067	0.3533	PREDICTED: transcription factor MYB44-like [Lupinus angustifolius] >OIV96352.1 hypothetical protein TanjilG_09779 [Lupinus angustifolius]
TRINITY_DN15294_c0_g1	0.26	0.3333	9.2467	0.3267	0.1733	0.3	0.3333	5.5233	PREDICTED: transcription factor MYB108-like isoform X1 [Lupinus angustifolius] >OIW21095.1 hypothetical protein TanjilG_29228 [Lupinus angustifolius]
TRINITY_DN16281_c0_g2	0.43	0.0933	0.1833	0.29	0.0533	0.08	3.84	0.1833	PREDICTED: NAC domain-containing protein 73-like [Lupinus angustifolius] >XP_019422875.1 PREDICTED: NAC domain-containing protein 73-like [Lupinus angustifolius] >OIV93239.1 hypothetical protein TanjilG_27418 [Lupinus angustifolius]
TRINITY_DN1662_c0_g1	9.6433	5.7767	14.6767	2.43	3.89	18.9733	3.5	0.2367	PREDICTED: NAC domain-containing protein 86-like [Lupinus angustifolius] >XP_019459723.1 PREDICTED: NAC domain-containing protein 86-like [Lupinus angustifolius] >OIW02630.1 hypothetical protein TanjilG_24081 [Lupinus angustifolius]
TRINITY_DN16818_c0_g1	1.41	1.0167	0.45	0.92	0.5567	0.4367	1.0533	2.2867	PREDICTED: transcription factor PCL1-like [Lupinus angustifolius] >XP_019436598.1 PREDICTED: transcription factor PCL1-like [Lupinus angustifolius] >XP_019436599.1 PREDICTED: transcription factor PCL1-like [Lupinus angustifolius] >OIW15956.1 hypothetical protein TanjilG_04491 [Lupinus angustifolius]
TRINITY_DN16827_c2_g1	3.03	1.9767	0.0967	1.0667	0.6567	0.13	0.5733	0.71	PREDICTED: putative peroxisomal biogenesis factor 19 [Lupinus angustifolius] >OIW13419.1 hypothetical protein TanjilG_33068 [Lupinus angustifolius]
TRINITY_DN17193_c0_g1	0.0933	1.4133	4.55	1.0767	0.6233	1.58	0.8567	0.6933	PREDICTED: transcription factor MYB86-like isoform X3 [Lupinus angustifolius]
TRINITY_DN1776_c0_g1	3.4733	2.15	4.28	1.5	3.1433	1.2667	5.9667	4.1333	PREDICTED: protein ODORANT1-like [Lupinus angustifolius] >OIV94598.1 hypothetical protein TanjilG_06624 [Lupinus angustifolius]
TRINITY_DN1776_c0_g2	1.22	0.6133	0.72	1.2867	0.8867	1.43	2.46	2.1367	PREDICTED: protein ODORANT1-like [Lupinus angustifolius] >OIW10819.1 hypothetical protein TanjilG_27765 [Lupinus angustifolius]
TRINITY_DN18013_c0_g1	1.2367	11.01	19.0767	10.3767	4.2667	11.7133	5.3567	8.9167	PREDICTED: transcription factor NAI1-like [Lupinus angustifolius]
TRINITY_DN18013_c0_g2	1.03	1.98	5.03	2.4467	1.7833	3.0067	2.72	1.9267	PREDICTED: transcription factor NAI1-like [Lupinus angustifolius]
TRINITY_DN18016_c0_g1	2.59	0.7667	0.09	0.2333	0.4533	0.05	3.8433	0.34	PREDICTED: transcription factor bHLH79-like isoform X2 [Lupinus angustifolius]
TRINITY_DN18049_c0_g1	0.09	1.0867	2.5933	2.0033	0.5167	3.1967	0.81	0.6833	PREDICTED: transcription factor bHLH94-like [Lupinus angustifolius] >OIW21841.1 hypothetical protein TanjilG_12950 [Lupinus angustifolius]
TRINITY_DN18327_c0_g3	2.1133	3.7267	3.2567	3.78	1.37	1.5533	10.28	5.54	PREDICTED: protein RADIALIS-like 3 isoform X1 [Lupinus angustifolius] >OIW20456.1 hypothetical protein TanjilG_11841 [Lupinus angustifolius]
TRINITY_DN18445_c0_g1	0.4433	0.39	2.0367	0.5233	0.1967	7.7367	0.92	1.3	PREDICTED: transcription factor bHLH137-like [Lupinus angustifolius] >XP_019457886.1 PREDICTED: transcription factor bHLH137-like [Lupinus angustifolius] >OIW18255.1 hypothetical protein TanjilG_20310 [Lupinus angustifolius]
TRINITY_DN18909_c0_g2	0	0.0433	1.85	0.44	0.0933	0.51	0.1	0.42	PREDICTED: transcription factor ILI4-like [Lupinus angustifolius] >OIW01257.1 hypothetical protein TanjilG_10418 [Lupinus angustifolius]
TRINITY_DN19130_c0_g1	0.1967	0.5667	1.55	1.4567	0.56	2.2267	0.8767	1.3567	PREDICTED: protein REVEILLE 2-like [Lupinus angustifolius]
TRINITY_DN19646_c1_g1	0.0967	0.4233	1.4633	0.8567	0.3533	1.3167	0.5633	0.6767	PREDICTED: transcription factor bHLH67-like [Lupinus angustifolius] >OIW04562.1 hypothetical protein TanjilG_20918 [Lupinus angustifolius]
TRINITY_DN20563_c0_g1	56.27	18.2833	2.83	11.3033	10.4067	13.1567	42.6767	11.2833	PREDICTED: WD repeat-containing protein 44-like [Lupinus angustifolius] >OIV98639.1 hypothetical protein TanjilG_12762 [Lupinus angustifolius]
TRINITY_DN20615_c0_g1	0	0.3333	0.2167	0.58	2.4367	1.34	0.2833	1.0967	PREDICTED: transcription factor DIVARICATA-like [Lupinus angustifolius] >OIW12957.1 hypothetical protein TanjilG_15406 [Lupinus angustifolius]
TRINITY_DN21051_c0_g1	0.7733	1.0467	0.59	2.08	0.8533	0.67	0.27	0.2533	PREDICTED: transcription factor MYB36-like [Lupinus angustifolius]
TRINITY_DN21989_c0_g1	0.22	0.7933	1.38	1.16	0.3733	0.92	1.5433	1.3733	PREDICTED: NAC domain-containing protein 30-like [Lupinus angustifolius]
TRINITY_DN23114_c0_g1	0.6367	0.4167	11.4867	0.3067	0.4433	3.8233	1.3067	5.72	PREDICTED: NAC transcription factor 29-like [Lupinus angustifolius] >OIW04777.1 hypothetical protein TanjilG_08660 [Lupinus angustifolius]
TRINITY_DN23114_c0_g2	2.93	2.1567	11.63	1.4767	1.75	9.69	4.9733	9.42	PREDICTED: NAC transcription factor 29-like [Lupinus angustifolius] >OIW16706.1 hypothetical protein TanjilG_24176 [Lupinus angustifolius]
TRINITY_DN23745_c0_g1	14.7967	9.3467	0	10.78	10.8533	51.13	48.1633	0.2367	hypothetical protein TanjilG_14038 [Lupinus angustifolius]
TRINITY_DN24005_c0_g1	6.9467	4.44	1.31	6.04	3.3033	2.39	6.9	5.0233	PREDICTED: myb-related protein 308-like [Lupinus angustifolius] >OIV91042.1 hypothetical protein TanjilG_17002 [Lupinus angustifolius]
TRINITY_DN2439_c0_g1	10.5333	19.4633	23.7633	28.55	28.6867	51.5167	42.9	15.91	PREDICTED: protein LHY-like isoform X2 [Lupinus angustifolius]
TRINITY_DN25071_c0_g1	0.6467	2.1867	4.58	2.39	0.72	3.4233	0.9233	1.11	PREDICTED: transcription factor bHLH30-like [Lupinus angustifolius] >OIW16562.1 hypothetical protein TanjilG_17735 [Lupinus angustifolius]
TRINITY_DN25149_c0_g1	1.0267	3.71	3.3667	0	1.1667	10.84	2.6467	3.9	dnaJ homolog subfamily C member 2-like [Glycine soja] >KHN45462.1 DnaJ like subfamily C member 2 [Glycine soja] >RZB76245.1 DnaJ-like subfamily C member 2 [Glycine soja]
TRINITY_DN26088_c0_g1	1.0133	0.18	0.08	0.2467	0.3	0.1933	0.95	0.13	PREDICTED: WD repeat-containing protein 44-like [Lupinus angustifolius] >OIW18894.1 hypothetical protein TanjilG_25337 [Lupinus angustifolius]
TRINITY_DN26329_c0_g1	0.4733	0.8833	0.8867	1.09	0.8267	2.7667	0.4367	0.5567	PREDICTED: transcription factor bHLH30-like [Lupinus angustifolius] >OIW20796.1 hypothetical protein TanjilG_23176 [Lupinus angustifolius]
TRINITY_DN2721_c1_g1	5.49	6.2267	9.5867	6.4233	7.7367	11.04	0	5.2133	PREDICTED: telomere repeat-binding protein 3-like isoform X2 [Lupinus angustifolius] >OIW14176.1 hypothetical protein TanjilG_21316 [Lupinus angustifolius]
TRINITY_DN2732_c0_g2	0.1133	1.14	1.2967	1.2167	0.36	0.9967	1.2267	0.85	PREDICTED: transcription factor bHLH71-like isoform X2 [Lupinus angustifolius] >XP_019445301.1 PREDICTED: transcription factor bHLH71-like isoform X2 [Lupinus angustifolius] >OIW10668.1 hypothetical protein TanjilG_16040 [Lupinus angustifolius]
TRINITY_DN27362_c0_g1	0.9733	0.4533	0.23	0.7867	0.12	0.2367	1.3133	0.31	PREDICTED: myb-related protein 308-like [Lupinus angustifolius]
TRINITY_DN2795_c0_g1	34.28	14.54	6.1533	15.14	16.5567	13.4933	28.9633	10.9467	PREDICTED: myb-like protein J [Lupinus angustifolius] >OIW03796.1 hypothetical protein TanjilG_30072 [Lupinus angustifolius]
TRINITY_DN28045_c0_g1	0.6467	0.2833	0.03	0.46	0.3967	0.1167	0.7567	0.1533	PREDICTED: transcription factor MYB80-like [Lupinus angustifolius] >OIW15711.1 hypothetical protein TanjilG_04246 [Lupinus angustifolius]
TRINITY_DN29128_c0_g1	2.2333	1.2567	0.6267	1.0967	1.3067	1.2067	1.3	3.0567	PREDICTED: transcription factor LUX-like [Lupinus angustifolius] >XP_019458895.1 PREDICTED: transcription factor LUX-like [Lupinus angustifolius] >OIW03715.1 hypothetical protein TanjilG_29750 [Lupinus angustifolius]
TRINITY_DN3073_c0_g1	3.7967	1.2833	0.06	0.3033	0.3833	0.2567	1.8367	1.1367	PREDICTED: transcription factor bHLH79-like isoform X2 [Lupinus angustifolius]
TRINITY_DN31407_c1_g1	0.5467	0.8667	1.9633	0.0533	0.0133	1.6533	0.56	0.0533	PREDICTED: transcription factor ORG2-like [Lupinus angustifolius] >OIW11491.1 hypothetical protein TanjilG_26857 [Lupinus angustifolius]
TRINITY_DN31893_c0_g1	0.2633	1.1333	3.6033	0.66	0.5233	2.4067	1.7667	1.66	PREDICTED: transcription factor ALC-like isoform X1 [Lupinus angustifolius] >OIW15649.1 hypothetical protein TanjilG_08225 [Lupinus angustifolius]
TRINITY_DN32123_c0_g1	3.1167	0.4867	0.4833	0.63	0.6867	0.2867	5.2667	5.43	PREDICTED: transcription factor MYB108-like [Lupinus angustifolius] >XP_019418269.1 PREDICTED: transcription factor MYB108-like [Lupinus angustifolius] >OIV95950.1 hypothetical protein TanjilG_27054 [Lupinus angustifolius]
TRINITY_DN32123_c0_g2	0.56	0.2767	1.92	0.0367	0.3	0.0267	0.8933	0.76	PREDICTED: transcription factor MYB108-like [Lupinus angustifolius]
TRINITY_DN37221_c0_g1	7.1867	8.4833	2.98	0.09	3.4267	2.5067	5.94	5.35	PREDICTED: transcription factor bHLH87-like [Lupinus angustifolius] >OIW16877.1 hypothetical protein TanjilG_00126 [Lupinus angustifolius]
TRINITY_DN4244_c0_g1	0.33	0.0733	3.3367	0.12	0.08	0.52	0.19	1.18	PREDICTED: NAC domain-containing protein 92-like [Lupinus angustifolius]
TRINITY_DN43096_c0_g1	2.4267	2.58	7.4	9.6433	3.2333	5.3867	3.1933	2.8633	PREDICTED: NAC domain-containing protein 35-like isoform X1 [Lupinus angustifolius] >OIV99610.1 hypothetical protein TanjilG_17420 [Lupinus angustifolius]
TRINITY_DN43422_c1_g1	5	3.7	1.2767	2.5267	1.8833	0.7667	6.1267	4.78	PREDICTED: myb-related protein Myb4-like [Lupinus angustifolius] >OIW07696.1 hypothetical protein TanjilG_30773 [Lupinus angustifolius]
TRINITY_DN46437_c0_g1	0.02	0.3433	1.2667	0.37	0.11	0.5233	0.43	0.3733	PREDICTED: myb-related protein Myb4-like [Lupinus angustifolius] >XP_019427029.1 PREDICTED: myb-related protein Myb4-like [Lupinus angustifolius]
TRINITY_DN5111_c1_g1	5.83	5.2267	13.6933	9.3867	1.83	2.4867	6.9833	4.7567	hypothetical protein TanjilG_05116 [Lupinus angustifolius]
TRINITY_DN52312_c0_g2	2.5633	1.7067	0.4467	0.4133	0.7633	0.29	5.62	1.0767	PREDICTED: myb-related protein 306-like [Lupinus angustifolius]
TRINITY_DN53837_c0_g2	0	0.9833	1.9833	4.6133	0	14.7833	0.3667	4.04	PREDICTED: transcription factor MYB1R1-like [Lupinus angustifolius] >OIW00109.1 hypothetical protein TanjilG_29099 [Lupinus angustifolius]
TRINITY_DN54298_c0_g1	1.3833	0.7367	0	0.7733	1.05	9.34	4.5867	0	hypothetical protein TanjilG_01684 [Lupinus angustifolius]
TRINITY_DN59447_c0_g1	1.65	1.3067	0.81	2.42	0	1.8	4.85	0	PREDICTED: transcription factor bHLH125-like isoform X1 [Lupinus angustifolius] >XP_019440248.1 PREDICTED: transcription factor bHLH125-like isoform X2 [Lupinus angustifolius]
TRINITY_DN60946_c0_g2	0.02	0.2167	0.9067	0.31	0.1633	0.2267	0.11	0.2533	PREDICTED: transcription factor MYB26-like [Lupinus angustifolius] >OIW22039.1 hypothetical protein TanjilG_31345 [Lupinus angustifolius]
TRINITY_DN6135_c0_g1	7.5467	8.07	19.5467	6.8733	6.5633	14.0733	30.0233	16.9267	PREDICTED: NAC domain-containing protein 2 [Lupinus angustifolius] >OIV96664.1 hypothetical protein TanjilG_09206 [Lupinus angustifolius]
TRINITY_DN61495_c0_g1	82.8567	60.58	22.1433	28.07	110.913	4.9	58.4933	8.8767	PREDICTED: transcription factor MYB113-like [Lupinus angustifolius] >OIW01216.1 hypothetical protein TanjilG_10377 [Lupinus angustifolius]
TRINITY_DN63104_c0_g2	8.74	15.5167	15.4433	10.1767	9.7667	12.95	44.34	11.63	PREDICTED: transcription factor MYB3-like isoform X1 [Lupinus angustifolius] >OIW16139.1 hypothetical protein TanjilG_18854 [Lupinus angustifolius]
TRINITY_DN65908_c0_g2	1.2333	3.2667	7.2067	3.6567	1.87	5.1733	4.2133	3.7667	PREDICTED: transcription factor DIVARICATA [Lupinus angustifolius] >OIW19715.1 hypothetical protein TanjilG_18525 [Lupinus angustifolius]
TRINITY_DN68471_c0_g1	0.4633	4.44	0	0.6067	0.31	5.8433	2.0367	7.7933	PREDICTED: NAC domain-containing protein 82-like [Lupinus angustifolius]
TRINITY_DN737_c0_g1	18.5367	7.0833	1.18	5.72	9.3667	4.3	14.8133	3.21	PREDICTED: transcription factor MYB86-like [Lupinus angustifolius] >OIW13389.1 hypothetical protein TanjilG_16498 [Lupinus angustifolius]
TRINITY_DN737_c0_g2	19.3567	6.8067	1.1433	7.31	11.29	5.24	14.93	4.23	PREDICTED: uncharacterized protein LOC109329119 [Lupinus angustifolius] >OIV95533.1 hypothetical protein TanjilG_10921 [Lupinus angustifolius]
TRINITY_DN76778_c0_g2	9.75	7.61	2.54	5.57	7.1733	7.6567	8.75	4.9267	PREDICTED: NAC transcription factor 56-like isoform X1 [Lupinus angustifolius] >OIW05266.1 hypothetical protein TanjilG_03655 [Lupinus angustifolius]
TRINITY_DN78236_c0_g1	0	0	0	0	0.5567	1.74	0	0.0233	transcription factor, partial [Oryza sativa]
TRINITY_DN8087_c0_g1	0.0167	0.2467	5.8867	0.5567	0.32	1.2967	0.47	2.77	PREDICTED: transcription factor MYB59-like isoform X2 [Lupinus angustifolius]
TRINITY_DN8087_c1_g1	6.4067	16.6833	58.68	15.81	13.1467	29.93	13.2367	22.5067	PREDICTED: transcription factor MYB48-like [Lupinus angustifolius] >OIW09171.1 hypothetical protein TanjilG_11309 [Lupinus angustifolius]
TRINITY_DN8109_c0_g1	3.08	2.4133	0.5633	7.3167	5.46	0	6.2267	3	PREDICTED: U3 small nucleolar RNA-associated protein 18 homolog [Lupinus angustifolius] >XP_019449114.1 PREDICTED: U3 small nucleolar RNA-associated protein 18 homolog [Lupinus angustifolius] >OIW08288.1 hypothetical protein TanjilG_21754 [Lupinus angustifolius]
TRINITY_DN87583_c0_g1	0.24	0.7167	1.0033	0.5233	0.0767	0.2667	0.24	0.5567	PREDICTED: NAC domain-containing protein 86-like [Lupinus angustifolius] >OIV92814.1 hypothetical protein TanjilG_00948 [Lupinus angustifolius]
TRINITY_DN8779_c0_g1	0.47	1.19	2.7633	1.57	0.4733	1.2567	1.9033	2.2433	PREDICTED: transcription factor bHLH93-like isoform X2 [Lupinus angustifolius]
TRINITY_DN8829_c1_g1	0.97	2.9333	4.8333	2.9933	1.5	2.4933	2.1467	2.2633	PREDICTED: transcription factor ICE1-like [Lupinus angustifolius]
TRINITY_DN8978_c0_g1	0.4533	5.42	0.1533	2.8133	10.4867	0.3867	8.0533	8.7967	hypothetical protein TanjilG_02913 [Lupinus angustifolius]
TRINITY_DN9045_c0_g1	3.5	8.34	11.5567	9.7467	2.4433	4.1067	4.9433	5.1367	hypothetical protein TanjilG_00946 [Lupinus angustifolius]
TRINITY_DN9955_c0_g1	26.5233	22.9867	4.63	3.3567	5.72	2.9033	26	5.7267	PREDICTED: transcription factor MYB90-like [Lupinus angustifolius]
