# Supplementary material for: Comparative transcriptome analysis of Lupinus polyphyllus Lindl. provides a rich molecular resource for research on coloration mechanism
Source: PeerJ. 2022 Aug 2;10:e13836. doi: 10.7717/peerj.13836 (PMC9354738; doi:10.7717/peerj.13836)
Supplement: Supplemental Information 10 — The raw data of relative expression level of eight candicate genes for three biological replicates (nested with three technical replicates) [file peerj-10-13836-s010.xlsx]

## Sheet: Sheet1
Supplementary Table 9 The qRT-PCR analysis. The raw data of relative expression level of six candicate genes for three biological replicates (nested with three technical replicates)
Experiment Name	Analysis Name	Pairing Name	Sample Name	Target TargetName	Reference TargetName	Target Mean Cp	Target Cp Error	Reference Mean Cp	Reference Cp Error	Target/Reference Ratio	Target/Reference Error
Sample 1
20211015-Gao8.00am	Basic Relative Quantification for All Samples	B1/A1	PIK	BCH2	ACT	18.6454	0.354455	20.2548	0.646164	4.6252	0.0557
20211015-Gao8.00am	Basic Relative Quantification for All Samples	B4/A4	PKW	BCH2	ACT	20.1445	0.0954354	21.6548	0.669847	2.2243	0.0755
20211015-Gao8.00am	Basic Relative Quantification for All Samples	B7/A7	PUL	BCH2	ACT	20.1245	0.935435	21.6543	0.368947	2.1531	0.1535
20211015-Gao8.00am	Basic Relative Quantification for All Samples	B10/A10	PWH	BCH2	ACT	19.9245	0.935434	20.0255	0.348438	1.759	0.1835
20211015-Gao8.00am	Basic Relative Quantification for All Samples	C1/A1	PIK	ZEP	ACT	18.2242	0.134534	21.5486	0.0784839	8.0025	0.0393
20211015-Gao8.00am	Basic Relative Quantification for All Samples	C4/A4	PKW	ZEP	ACT	19.7655	0.133353	21.383	0.846649	4.6235	0.4514
20211015-Gao8.00am	Basic Relative Quantification for All Samples	C7/A7	PUL	ZEP	ACT	20.0654	0.194539	21.8409	0.268947	4.1026	0.5563
20211015-Gao8.00am	Basic Relative Quantification for All Samples	C10/A10	PWH	ZEP	ACT	20.2435	0.139935	21.2548	0.264889	3.8547	0.1963
20211015-Gao8.00am	Basic Relative Quantification for All Samples	F1/A1	PIK	ANS	ACT	19.1434	0.393443	20.8657	0.968849	4.6325	0.0136
20211015-Gao8.00am	Basic Relative Quantification for All Samples	F4/A4	PKW	ANS	ACT	18.7396	0.387634	21.3811	0.698487	5.9864	0.6864
20211015-Gao8.00am	Basic Relative Quantification for All Samples	F7/A7	PUL	ANS	ACT	21.5969	0.239846	21.8436	0.674645	1.7542	0.5155
20211015-Gao8.00am	Basic Relative Quantification for All Samples	F10/A10	PWH	ANS	ACT	20.5947	0.844345	21.841	0.67468	2.3356	0.2155
20211015-Gao8.00am	Basic Relative Quantification for All Samples	E1/A1	PIK	GT	ACT	19.0946	0.284435	20.3453	0.846787	4.412	0.0442
20211015-Gao8.00am	Basic Relative Quantification for All Samples	E4/A4	PKW	GT	ACT	18.9965	0.44343	21.3454	0.178672	4.8652	0.2778
20211015-Gao8.00am	Basic Relative Quantification for All Samples	E7/A7	PUL	GT	ACT	21.0964	0.484649	21.3434	0.298146	1.8524	0.1931
20211015-Gao8.00am	Basic Relative Quantification for All Samples	E10/A10	PWH	GT	ACT	20.3968	0.248649	20.3839	0.496464	1.0235	0.8331
20211015-Gao8.00am	Basic Relative Quantification for All Samples	D1/A1	PIK	CHS	ACT	19.9469	0.344496	20.3944	0.464689	3.7452	0.063
20211015-Gao8.00am	Basic Relative Quantification for All Samples	D4/A4	PKW	CHS	ACT	21.6948	0.448649	21.6434	0.489649	1.0235	0.1352
20211015-Gao8.00am	Basic Relative Quantification for All Samples	D7/A7	PUL	CHS	ACT	21.0977	0.248643	21.841	0.84696	2.1345	0.0884
20211015-Gao8.00am	Basic Relative Quantification for All Samples	D10/A10	PWH	CHS	ACT	21.0977	0.284865	21.4258	0.294646	1.6352	0.0964
20211015-Gao8.00am	Basic Relative Quantification for All Samples	G1/A1	PIK	DFR	ACT	19.897	0.368469	22.0528	0.946797	7.1024	0.0588
20211015-Gao8.00am	Basic Relative Quantification for All Samples	G4/A4	PKW	DFR	ACT	20.6987	0.264685	21.3439	0.974679	2.2415	0.2575
20211015-Gao8.00am	Basic Relative Quantification for All Samples	G7/A7	PUL	DFR	ACT	19.8795	0.268768	21.4785	0.798678	4.1203	0.1407
20211015-Gao8.00am	Basic Relative Quantification for All Samples	G10/A10	PWH	DFR	ACT	19.8496	0.687677	20.4258	0.978622	3.6658	0.1427
20211015-Gao8.00am	Basic Relative Quantification for All Samples	H1/A1	PIK	WD40	ACT	20.037	0.386877	21.3486	0.343453	4.2351	0.0548
20211015-Gao8.00am	Basic Relative Quantification for All Samples	H4/A4	PKW	WD40	ACT	21.657	0.864865	21.7453	0.436436	1.4253	0.1575
20211015-Gao8.00am	Basic Relative Quantification for All Samples	H7/A7	PUL	WD40	ACT	19.817	0.268465	20.4526	0.396444	1.6354	0.1407
20211015-Gao8.00am	Basic Relative Quantification for All Samples	H10/A10	PWH	WD40	ACT	19.8177	0.268465	20.5473	0.378968	1.2031	0.1427
20211015-Gao1.00Pm	Basic Relative Quantification for All Samples	B1/A1	PYH	BCH2	ACT	19.9496	0.368769	21.8475	0.976766	4.4135	0.0557
20211015-Gao1.00Pm	Basic Relative Quantification for All Samples	B4/A4	RED	BCH2	ACT	21.6065	0.664865	21.6983	0.976662	1.5324	0.0745
20211015-Gao1.00Pm	Basic Relative Quantification for All Samples	B7/A7	WHT	BCH2	ACT	20.4677	0.968465	20.6855	0.387868	2.3015	0.2835
20211015-Gao1.00Pm	Basic Relative Quantification for All Samples	B10/A10	YEL	BCH2	ACT	20.4365	0.968465	20.6852	0.386467	1.6024	0.1885
20211015-Gao1.00Pm	Basic Relative Quantification for All Samples	C1/A1	PYH	ZEP	ACT	19.2465	0.694646	21.4254	0.796787	7.4256	0.0398
20211015-Gao1.00Pm	Basic Relative Quantification for All Samples	C4/A4	RED	ZEP	ACT	20.7647	0.184646	21.2459	0.979679	3.6035	0.4254
20211015-Gao1.00Pm	Basic Relative Quantification for All Samples	C7/A7	WHT	ZEP	ACT	20.9465	0.684649	21.7483	0.287976	3.7524	0.1543
20211015-Gao1.00Pm	Basic Relative Quantification for All Samples	C10/A10	YEL	ZEP	ACT	20.9265	0.684685	21.4266	0.297868	3.6985	0.4563
20211015-Gao1.00Pm	Basic Relative Quantification for All Samples	F1/A1	PYH	ANS	ACT	20.4046	0.464647	20.4859	0.879679	1.2356	0.0176
20211015-Gao1.00Pm	Basic Relative Quantification for All Samples	F4/A4	RED	ANS	ACT	20.9647	0.946465	21.0259	0.87979	1.3024	0.1464
20211015-Gao1.00Pm	Basic Relative Quantification for All Samples	F7/A7	WHT	ANS	ACT	19.6466	0.464865	21.8325	0.79789	5.2142	0.1555
20211015-Gao1.00Pm	Basic Relative Quantification for All Samples	F10/A10	YEL	ANS	ACT	20.8565	0.413456	21.4259	0.296456	2.6354	0.1545
20211015-Gao1.00Pm	Basic Relative Quantification for All Samples	E1/A1	PYH	GT	ACT	19.7355	0.464565	20.0255	0.464897	1.9201	0.0482
20211015-Gao1.00Pm	Basic Relative Quantification for All Samples	E4/A4	RED	GT	ACT	21.3655	0.456465	21.4013	0.469786	1.7254	0.4578
20211015-Gao1.00Pm	Basic Relative Quantification for All Samples	E7/A7	WHT	GT	ACT	20.4955	0.254646	21.7954	0.249688	3.9635	0.7891
20211015-Gao1.00Pm	Basic Relative Quantification for All Samples	E10/A10	YEL	GT	ACT	22.4965	0.846465	21.8453	0.248968	0.7524	0.4531
20211015-Gao1.00Pm	Basic Relative Quantification for All Samples	D1/A1	PYH	CHS	ACT	19.7065	0.645646	20.1425	0.87979	1.7452	0.023
20211015-Gao1.00Pm	Basic Relative Quantification for All Samples	D4/A4	RED	CHS	ACT	21.4365	0.246465	21.4759	0.87979	1.2354	0.1742
20211015-Gao1.00Pm	Basic Relative Quantification for All Samples	D7/A7	WHT	CHS	ACT	20.0246	0.264565	21.8244	0.27988	3.8354	0.0454
20211015-Gao1.00Pm	Basic Relative Quantification for All Samples	D10/A10	YEL	CHS	ACT	21.0265	0.634688	21.7459	0.978899	1.4253	0.0474
20211015-Gao1.00Pm	Basic Relative Quantification for All Samples	G1/A1	PYH	DFR	ACT	20.8646	0.87988	21.1453	0.788999	3.0523	0.0458
20211015-Gao1.00Pm	Basic Relative Quantification for All Samples	G4/A4	RED	DFR	ACT	20.8646	0.386876	21.4258	0.789667	2.3547	0.1785
20211015-Gao1.00Pm	Basic Relative Quantification for All Samples	G7/A7	WHT	DFR	ACT	18.8165	0.687646	21.2546	0.78898	8.3254	0.2457
20211015-Gao1.00Pm	Basic Relative Quantification for All Samples	G10/A10	YEL	DFR	ACT	19.2165	0.168688	19.8757	0.799892	2.4152	0.5637
20211015-Gao1.00Pm	Basic Relative Quantification for All Samples	H1/A1	PYH	WD40	ACT	21.4065	0.386449	21.8025	0.0777603	1.0235	0.0548
20211015-Gao1.00Pm	Basic Relative Quantification for All Samples	H4/A4	RED	WD40	ACT	21.6647	0.987987	21.5858	0.879486	0.9654	0.1575
20211015-Gao1.00Pm	Basic Relative Quantification for All Samples	H7/A7	WHT	WD40	ACT	19.8165	0.645647	20.4853	0.879787	3.7564	0.4587
20211015-Gao1.00Pm	Basic Relative Quantification for All Samples	H10/A10	YEL	WD40	ACT	19.8456	0.356486	20.7547	0.387979	2.6354	0.5807
20211015-Gao5.00Pm	Basic Relative Quantification for All Samples	B1/A1	PIK	NAC50	ACT	19.0355	0.684688	19.0565	0.789896	1.0524	0.0548
20211015-Gao5.00Pm	Basic Relative Quantification for All Samples	B4/A4	PKW	NAC50	ACT	21.6646	0.284862	21.1535	0.78979	0.8564	0.1585
20211015-Gao5.00Pm	Basic Relative Quantification for All Samples	B7/A7	PUL	NAC50	ACT	19.8546	0.578665	18.2555	0.987949	0.6241	0.6857
20211015-Gao5.00Pm	Basic Relative Quantification for All Samples	B10/A10	PWH	NAC50	ACT	19.8165	0.246868	20.5186	0.748969	1.1245	0.1507
20211015-Gao5.00Pm	Basic Relative Quantification for All Samples	C1/A1	PYH	NAC50	ACT	20.0355	0.384686	19.2877	0.789789	0.9031	0.0548
20211015-Gao5.00Pm	Basic Relative Quantification for All Samples	C4/A4	RED	NAC50	ACT	20.6655	0.686865	21.2688	0.678968	2.3305	0.1485
20211015-Gao5.00Pm	Basic Relative Quantification for All Samples	C7/A7	WHT	NAC50	ACT	19.8646	0.168685	20.3273	0.378898	2.2015	0.5865
20211015-Gao5.00Pm	Basic Relative Quantification for All Samples	C10/A10	YEL	NAC50	ACT	19.6457	0.684655	20.2536	0.788968	1.3245	0.1485
Sample 2
20211016-Gao8.00am	Basic Relative Quantification for All Samples	B1/A1	PIK	BCH2	ACT	18.5762	0.568698	20.1537	0.621864	4.8952	0.155557
20211016-Gao8.00am	Basic Relative Quantification for All Samples	B4/A4	PKW	BCH2	ACT	20.2454	0.0967865	21.5869	0.546464	2.5443	0.04555
20211016-Gao8.00am	Basic Relative Quantification for All Samples	B7/A7	PUL	BCH2	ACT	20.0124	0.996434	21.6679	0.58635	1.8531	0.0251
20211016-Gao8.00am	Basic Relative Quantification for All Samples	B10/A10	PWH	BCH2	ACT	19.8455	0.824646	20.0045	0.334696	1.5594	0.3481
20211016-Gao8.00am	Basic Relative Quantification for All Samples	C1/A1	PIK	ZEP	ACT	18.1459	0.687649	21.5579	0.0764696	8.5825	0.0493
20211016-Gao8.00am	Basic Relative Quantification for All Samples	C4/A4	PKW	ZEP	ACT	19.4579	0.245646	21.2469	0.8647	4.4235	0.41364
20211016-Gao8.00am	Basic Relative Quantification for All Samples	C7/A7	PUL	ZEP	ACT	20.1475	0.196786	21.8679	0.934696	4.4526	0.0345
20211016-Gao8.00am	Basic Relative Quantification for All Samples	C10/A10	PWH	ZEP	ACT	20.2456	0.676487	21.3469	0.0246489	3.2447	0.2025
20211016-Gao8.00am	Basic Relative Quantification for All Samples	F1/A1	PIK	ANS	ACT	19.1288	0.364895	20.7887	0.965469	4.0525	0.0236
20211016-Gao8.00am	Basic Relative Quantification for All Samples	F4/A4	PKW	ANS	ACT	18.6846	0.464565	21.3547	0.65469	5.3564	0.0456
20211016-Gao8.00am	Basic Relative Quantification for All Samples	F7/A7	PUL	ANS	ACT	21.3564	0.566877	21.7865	0.0746446	1.4572	0.1458
20211016-Gao8.00am	Basic Relative Quantification for All Samples	F10/A10	PWH	ANS	ACT	20.4558	0.776463	21.8685	0.87468	2.2346	0.0428
20211016-Gao8.00am	Basic Relative Quantification for All Samples	E1/A1	PIK	GT	ACT	19.0868	0.284435	20.3136	0.823847	3.9124	0.0752
20211016-Gao8.00am	Basic Relative Quantification for All Samples	E4/A4	PKW	GT	ACT	18.9877	0.44343	21.2457	0.452487	4.6652	0.0277
20211016-Gao8.00am	Basic Relative Quantification for All Samples	E7/A7	PUL	GT	ACT	21.1258	0.345646	21.3896	0.298146	2.0524	0.2548
20211016-Gao8.00am	Basic Relative Quantification for All Samples	E10/A10	PWH	GT	ACT	20.3968	0.833462	20.3569	0.496464	1.1255	0.0485
20211016-Gao8.00am	Basic Relative Quantification for All Samples	D1/A1	PIK	CHS	ACT	19.9838	0.34565	20.4026	0.436489	3.3458	0.0458
20211016-Gao8.00am	Basic Relative Quantification for All Samples	D4/A4	PKW	CHS	ACT	21.5769	0.464688	21.6434	0.154859	1.2245	0.4526
20211016-Gao8.00am	Basic Relative Quantification for All Samples	D7/A7	PUL	CHS	ACT	21.0877	0.278647	21.841	0.864769	2.3345	0.0874
20211016-Gao8.00am	Basic Relative Quantification for All Samples	D10/A10	PWH	CHS	ACT	21.1246	0.356689	21.4258	0.596469	1.4342	0.0904
20211016-Gao8.00am	Basic Relative Quantification for All Samples	G1/A1	PIK	DFR	ACT	19.8877	0.368469	22.0687	0.964695	6.9024	0.0508
20211016-Gao8.00am	Basic Relative Quantification for All Samples	G4/A4	PKW	DFR	ACT	20.7546	0.234685	21.3757	0.934968	2.2412	0.0245
20211016-Gao8.00am	Basic Relative Quantification for All Samples	G7/A7	PUL	DFR	ACT	19.2257	0.736988	21.4557	0.702349	3.8523	0.1856
20211016-Gao8.00am	Basic Relative Quantification for All Samples	G10/A10	PWH	DFR	ACT	19.8768	0.954639	20.4135	0.0934682	3.4654	0.7415
20211016-Gao8.00am	Basic Relative Quantification for All Samples	H1/A1	PIK	WD40	ACT	20.0877	0.383469	21.2657	0.364699	3.9535	0.0508
20211016-Gao8.00am	Basic Relative Quantification for All Samples	H4/A4	PKW	WD40	ACT	21.4679	0.863867	21.7046	0.678869	1.5251	0.2575
20211016-Gao8.00am	Basic Relative Quantification for All Samples	H7/A7	PUL	WD40	ACT	19.7646	0.578868	20.4687	0.302488	1.5354	0.0346
20211016-Gao8.00am	Basic Relative Quantification for All Samples	H10/A10	PWH	WD40	ACT	19.8876	0.266876	20.4569	0.0378968	1.2251	0.5442
20211016-Gao1.00Pm	Basic Relative Quantification for All Samples	B1/A1	PYH	BCH2	ACT	19.3768	0.368786	21.8247	0.924694	4.0113	0.0457
20211016-Gao1.00Pm	Basic Relative Quantification for All Samples	B4/A4	RED	BCH2	ACT	21.6546	0.634969	21.6126	0.395488	1.6321	0.0455
20211016-Gao1.00Pm	Basic Relative Quantification for All Samples	B7/A7	WHT	BCH2	ACT	20.3787	0.96388	20.587	0.682486	2.1015	0.2835
20211016-Gao1.00Pm	Basic Relative Quantification for All Samples	B10/A10	YEL	BCH2	ACT	20.4365	0.768769	20.6147	0.0864665	1.3202	0.0555
20211016-Gao1.00Pm	Basic Relative Quantification for All Samples	C1/A1	PYH	ZEP	ACT	19.2468	0.693879	21.347	0.726982	7.1256	0.0308
20211016-Gao1.00Pm	Basic Relative Quantification for All Samples	C4/A4	RED	ZEP	ACT	20.6668	0.766865	21.3486	0.93465	3.4035	0.4254
20211016-Gao1.00Pm	Basic Relative Quantification for All Samples	C7/A7	WHT	ZEP	ACT	20.6468	0.62577	21.7249	0.583496	3.1352	0.1543
20211016-Gao1.00Pm	Basic Relative Quantification for All Samples	C10/A10	YEL	ZEP	ACT	20.9787	0.488687	21.3947	0.203247	3.2985	0.5863
20211016-Gao1.00Pm	Basic Relative Quantification for All Samples	F1/A1	PYH	ANS	ACT	20.3679	0.786896	20.4859	0.837495	1.3358	0.0186
20211016-Gao1.00Pm	Basic Relative Quantification for All Samples	F4/A4	RED	ANS	ACT	20.8346	0.943968	21.0346	0.585249	1.3424	0.1468
20211016-Gao1.00Pm	Basic Relative Quantification for All Samples	F7/A7	WHT	ANS	ACT	19.5469	0.486787	21.8546	0.374915	4.9142	0.3655
20211016-Gao1.00Pm	Basic Relative Quantification for All Samples	F10/A10	YEL	ANS	ACT	20.8388	0.836987	21.4025	0.346915	2.2354	0.0845
20211016-Gao1.00Pm	Basic Relative Quantification for All Samples	E1/A1	PYH	GT	ACT	19.7688	0.738687	20.0258	0.946349	2.0203	0.0442
20211016-Gao1.00Pm	Basic Relative Quantification for All Samples	E4/A4	RED	GT	ACT	21.3568	0.438699	21.3946	0.0469786	1.9254	0.4788
20211016-Gao1.00Pm	Basic Relative Quantification for All Samples	E7/A7	WHT	GT	ACT	20.4955	0.236868	21.8329	0.346995	4.0635	0.7365
20211016-Gao1.00Pm	Basic Relative Quantification for All Samples	E10/A10	YEL	GT	ACT	22.4787	0.868699	21.8347	0.23669	0.8522	0.0931
20211016-Gao1.00Pm	Basic Relative Quantification for All Samples	D1/A1	PYH	CHS	ACT	19.7688	0.158659	20.1035	0.569698	1.8454	0.022
20211016-Gao1.00Pm	Basic Relative Quantification for All Samples	D4/A4	RED	CHS	ACT	21.4868	0.246387	21.4921	0.687979	1.4352	0.4742
20211016-Gao1.00Pm	Basic Relative Quantification for All Samples	D7/A7	WHT	CHS	ACT	20.0688	0.48697	21.735	0.279877	3.7335	0.0436
20211016-Gao1.00Pm	Basic Relative Quantification for All Samples	D10/A10	YEL	CHS	ACT	21.0026	0.63869	21.7564	0.248689	1.5254	0.01274
20211016-Gao1.00Pm	Basic Relative Quantification for All Samples	G1/A1	PYH	DFR	ACT	20.7579	0.375785	21.1386	0.569699	3.1523	0.0248
20211016-Gao1.00Pm	Basic Relative Quantification for All Samples	G4/A4	RED	DFR	ACT	20.8157	0.945646	21.3565	0.0789667	2.4548	0.3564
20211016-Gao1.00Pm	Basic Relative Quantification for All Samples	G7/A7	WHT	DFR	ACT	18.7679	0.568677	21.1324	0.7647	8.0254	0.0856
20211016-Gao1.00Pm	Basic Relative Quantification for All Samples	G10/A10	YEL	DFR	ACT	19.2068	0.78347	19.8059	0.479247	2.2154	0.4366
20211016-Gao1.00Pm	Basic Relative Quantification for All Samples	H1/A1	PYH	WD40	ACT	21.4135	0.636964	21.8235	0.0734694	1.1235	0.0504
20211016-Gao1.00Pm	Basic Relative Quantification for All Samples	H4/A4	RED	WD40	ACT	21.6237	0.64365	21.5436	0.824699	0.8654	0.5575
20211016-Gao1.00Pm	Basic Relative Quantification for All Samples	H7/A7	WHT	WD40	ACT	19.7869	0.71697	20.4347	0.587979	3.2564	0.4567
20211016-Gao1.00Pm	Basic Relative Quantification for All Samples	H10/A10	YEL	WD40	ACT	19.8028	0.563869	20.617	0.887979	2.3345	0.4856
20211016-Gao5.00Pm	Basic Relative Quantification for All Samples	B1/A1	PIK	NAC50	ACT	19.1239	0.663946	19.0565	0.723463	1.1525	0.0248
20211016-Gao5.00Pm	Basic Relative Quantification for All Samples	B4/A4	PKW	NAC50	ACT	21.6157	0.28697	21.1165	0.374687	0.7544	0.3585
20211016-Gao5.00Pm	Basic Relative Quantification for All Samples	B7/A7	PUL	NAC50	ACT	19.8028	0.267869	18.3564	0.798795	0.6581	0.6057
20211016-Gao5.00Pm	Basic Relative Quantification for All Samples	B10/A10	PWH	NAC50	ACT	19.7569	0.286697	20.5137	0.456849	1.2245	0.1007
20211016-Gao5.00Pm	Basic Relative Quantification for All Samples	C1/A1	PYH	NAC50	ACT	20.0028	0.756967	19.3035	0.345684	1.0431	0.0248
20211016-Gao5.00Pm	Basic Relative Quantification for All Samples	C4/A4	RED	NAC50	ACT	20.6038	0.946869	21.2534	0.168988	2.4301	0.1005
20211016-Gao5.00Pm	Basic Relative Quantification for All Samples	C7/A7	WHT	NAC50	ACT	19.8459	0.0168685	20.3213	0.332419	2.0015	0.1165
20211016-Gao5.00Pm	Basic Relative Quantification for All Samples	C10/A10	YEL	NAC50	ACT	19.6036	0.600585	20.2305	0.788935	1.2245	0.4415
Sample 3
20211017-Gao8.00am	Basic Relative Quantification for All Samples	B1/A1	PIK	BCH2	ACT	18.5865	0.0563985	20.1565	0.454645	4.1253	0.012
20211017-Gao8.00am	Basic Relative Quantification for All Samples	B4/A4	PKW	BCH2	ACT	20.1245	0.0866954	21.6542	0.66469	2.4244	0.0355
20211017-Gao8.00am	Basic Relative Quantification for All Samples	B7/A7	PUL	BCH2	ACT	20.1025	0.893539	21.4669	0.364697	2.0531	0.2035
20211017-Gao8.00am	Basic Relative Quantification for All Samples	B10/A10	PWH	BCH2	ACT	19.8946	0.864443	20.0235	0.364696	1.6591	0.3035
20211017-Gao8.00am	Basic Relative Quantification for All Samples	C1/A1	PIK	ZEP	ACT	18.2153	0.539693	21.5347	0.0784867	8.1525	0.0283
20211017-Gao8.00am	Basic Relative Quantification for All Samples	C4/A4	PKW	ZEP	ACT	19.7023	0.133353	21.167	0.465499	4.2234	0.4064
20211017-Gao8.00am	Basic Relative Quantification for All Samples	C7/A7	PUL	ZEP	ACT	20.0625	0.494528	21.867	0.268965	3.8026	0.5353
20211017-Gao8.00am	Basic Relative Quantification for All Samples	C10/A10	PWH	ZEP	ACT	20.2153	0.339935	21.4698	0.566859	3.7544	0.1083
20211017-Gao8.00am	Basic Relative Quantification for All Samples	F1/A1	PIK	ANS	ACT	19.1125	0.693446	20.6877	0.345699	4.3345	0.0456
20211017-Gao8.00am	Basic Relative Quantification for All Samples	F4/A4	PKW	ANS	ACT	18.7011	0.487389	21.3647	0.698455	6.1864	0.6836
20211017-Gao8.00am	Basic Relative Quantification for All Samples	F7/A7	PUL	ANS	ACT	21.5364	0.339383	21.7969	0.458675	1.4542	0.4655
20211017-Gao8.00am	Basic Relative Quantification for All Samples	F10/A10	PWH	ANS	ACT	20.5453	0.444235	21.8397	0.664697	2.0346	0.6455
20211017-Gao8.00am	Basic Relative Quantification for All Samples	E1/A1	PIK	GT	ACT	19.1092	0.128443	20.2469	0.813168	4.5121	0.0142
20211017-Gao8.00am	Basic Relative Quantification for All Samples	E4/A4	PKW	GT	ACT	18.9357	0.434866	21.3169	0.668918	4.5651	0.2088
20211017-Gao8.00am	Basic Relative Quantification for All Samples	E7/A7	PUL	GT	ACT	21.099	0.248459	21.2957	0.2347	1.7522	0.1681
20211017-Gao8.00am	Basic Relative Quantification for All Samples	E10/A10	PWH	GT	ACT	20.3957	0.548649	20.3347	0.463497	1.3234	0.8341
20211017-Gao8.00am	Basic Relative Quantification for All Samples	D1/A1	PIK	CHS	ACT	19.9169	0.36847	20.4036	0.869465	3.8445	0.0615
20211017-Gao8.00am	Basic Relative Quantification for All Samples	D4/A4	PKW	CHS	ACT	21.6457	0.434394	21.687	0.486457	1.3235	0.1352
20211017-Gao8.00am	Basic Relative Quantification for All Samples	D7/A7	PUL	CHS	ACT	21.0964	0.248643	21.8697	0.68847	2.4345	0.0354
20211017-Gao8.00am	Basic Relative Quantification for All Samples	D10/A10	PWH	CHS	ACT	21.121	0.684865	21.4035	0.266995	1.3242	0.0634
20211017-Gao8.00am	Basic Relative Quantification for All Samples	G1/A1	PIK	DFR	ACT	19.8113	0.354688	22.0597	0.900249	7.3144	0.04658
20211017-Gao8.00am	Basic Relative Quantification for All Samples	G4/A4	PKW	DFR	ACT	20.6464	0.764685	21.3467	0.156597	1.8245	0.2065
20211017-Gao8.00am	Basic Relative Quantification for All Samples	G7/A7	PUL	DFR	ACT	19.8234	0.168768	21.4459	0.56968	3.8903	0.1407
20211017-Gao8.00am	Basic Relative Quantification for All Samples	G10/A10	PWH	DFR	ACT	19.8036	0.587634	20.4035	0.0158979	3.1655	0.1427
20211017-Gao8.00am	Basic Relative Quantification for All Samples	H1/A1	PIK	WD40	ACT	20.0439	0.33437	21.277	0.356984	4.5351	0.0548
20211017-Gao8.00am	Basic Relative Quantification for All Samples	H4/A4	PKW	WD40	ACT	21.6134	0.458486	21.7647	0.467694	1.5247	0.1575
20211017-Gao8.00am	Basic Relative Quantification for All Samples	H7/A7	PUL	WD40	ACT	19.8536	0.868465	20.4365	0.335999	1.8344	0.1407
20211017-Gao8.00am	Basic Relative Quantification for All Samples	H10/A10	PWH	WD40	ACT	19.7364	0.22349	20.457	0.537897	1.5081	0.1427
20211017-Gao1.00Pm	Basic Relative Quantification for All Samples	B1/A1	PYH	BCH2	ACT	19.9134	0.339697	21.8347	0.597677	4.2135	0.0557
20211017-Gao1.00Pm	Basic Relative Quantification for All Samples	B4/A4	RED	BCH2	ACT	21.5764	0.634596	21.567	0.797666	1.3524	0.0745
20211017-Gao1.00Pm	Basic Relative Quantification for All Samples	B7/A7	WHT	BCH2	ACT	20.4134	0.681968	20.6137	0.364999	2.0015	0.2835
20211017-Gao1.00Pm	Basic Relative Quantification for All Samples	B10/A10	YEL	BCH2	ACT	20.3946	0.968465	20.5295	0.336899	1.5024	0.1885
20211017-Gao1.00Pm	Basic Relative Quantification for All Samples	C1/A1	PYH	ZEP	ACT	19.2665	0.63164	21.457	0.479679	7.0256	0.0398
20211017-Gao1.00Pm	Basic Relative Quantification for All Samples	C4/A4	RED	ZEP	ACT	20.7134	0.234362	21.2547	0.397968	3.2535	0.4254
20211017-Gao1.00Pm	Basic Relative Quantification for All Samples	C7/A7	WHT	ZEP	ACT	20.9366	0.633968	21.5699	0.257897	3.6545	0.1543
20211017-Gao1.00Pm	Basic Relative Quantification for All Samples	C10/A10	YEL	ZEP	ACT	20.9265	0.35464	21.4567	0.797868	3.3185	0.4563
20211017-Gao1.00Pm	Basic Relative Quantification for All Samples	F1/A1	PYH	ANS	ACT	20.4134	0.839646	20.3769	0.456888	1.4396	0.0176
20211017-Gao1.00Pm	Basic Relative Quantification for All Samples	F4/A4	RED	ANS	ACT	20.9132	0.563969	21.0698	0.64569	1.002	0.1364
20211017-Gao1.00Pm	Basic Relative Quantification for All Samples	F7/A7	WHT	ANS	ACT	19.6466	0.43654	21.8565	0.285688	4.8914	0.0655
20211017-Gao1.00Pm	Basic Relative Quantification for All Samples	F10/A10	YEL	ANS	ACT	20.8565	0.164865	21.4068	0.23697	2.5354	0.4845
20211017-Gao1.00Pm	Basic Relative Quantification for All Samples	E1/A1	PYH	GT	ACT	19.7355	0.864565	20.0569	0.468696	1.9152	0.0463
20211017-Gao1.00Pm	Basic Relative Quantification for All Samples	E4/A4	RED	GT	ACT	21.3655	0.43464	21.347	0.678695	1.8254	0.4508
20211017-Gao1.00Pm	Basic Relative Quantification for All Samples	E7/A7	WHT	GT	ACT	20.457	0.254644	21.7457	0.268695	4.1263	0.3091
20211017-Gao1.00Pm	Basic Relative Quantification for All Samples	E10/A10	YEL	GT	ACT	22.4134	0.684646	21.7647	0.686925	0.5528	0.1131
20211017-Gao1.00Pm	Basic Relative Quantification for All Samples	D1/A1	PYH	CHS	ACT	19.6467	0.445646	20.1285	0.805486	1.8454	0.0265
20211017-Gao1.00Pm	Basic Relative Quantification for All Samples	D4/A4	RED	CHS	ACT	21.3494	0.224696	21.4564	0.285486	1.3784	0.3642
20211017-Gao1.00Pm	Basic Relative Quantification for All Samples	D7/A7	WHT	CHS	ACT	20.014	0.526456	21.865	0.645698	3.6353	0.0564
20211017-Gao1.00Pm	Basic Relative Quantification for All Samples	D10/A10	YEL	CHS	ACT	21.1026	0.646465	21.7657	0.468979	1.7536	0.0164
20211017-Gao1.00Pm	Basic Relative Quantification for All Samples	G1/A1	PYH	DFR	ACT	20.834	0.156465	21.1355	0.646898	3.5523	0.043
20211017-Gao1.00Pm	Basic Relative Quantification for All Samples	G4/A4	RED	DFR	ACT	20.814	0.696864	21.284	0.708963	2.4155	0.2785
20211017-Gao1.00Pm	Basic Relative Quantification for All Samples	G7/A7	WHT	DFR	ACT	18.7654	0.564565	21.2057	0.278898	7.6859	0.0657
20211017-Gao1.00Pm	Basic Relative Quantification for All Samples	G10/A10	YEL	DFR	ACT	19.2036	0.364565	19.8646	0.379989	2.6155	0.1637
20211017-Gao1.00Pm	Basic Relative Quantification for All Samples	H1/A1	PYH	WD40	ACT	21.3564	0.265465	21.8156	0.107776	1.4523	0.0576
20211017-Gao1.00Pm	Basic Relative Quantification for All Samples	H4/A4	RED	WD40	ACT	21.6139	0.664694	21.5457	0.208795	0.7612	0.2575
20211017-Gao1.00Pm	Basic Relative Quantification for All Samples	H7/A7	WHT	WD40	ACT	19.7654	0.356456	20.4776	0.803466	3.4544	0.3587
20211017-Gao1.00Pm	Basic Relative Quantification for All Samples	H10/A10	YEL	WD40	ACT	19.8356	0.466487	20.7129	0.35388	2.2474	0.3607
20211017-Gao5.00Pm	Basic Relative Quantification for All Samples	B1/A1	PIK	NAC50	ACT	19.0012	0.156668	19.0867	0.307899	1.152	0.03148
20211017-Gao5.00Pm	Basic Relative Quantification for All Samples	B4/A4	PKW	NAC50	ACT	21.6257	0.268699	21.1454	0.407898	0.6455	0.1512
20211017-Gao5.00Pm	Basic Relative Quantification for All Samples	B7/A7	PUL	NAC50	ACT	19.8357	0.866322	18.2397	0.259879	0.6041	0.0857
20211017-Gao5.00Pm	Basic Relative Quantification for All Samples	B10/A10	PWH	NAC50	ACT	19.7366	0.268469	20.5227	0.574897	0.9658	0.1307
20211017-Gao5.00Pm	Basic Relative Quantification for All Samples	C1/A1	PYH	NAC50	ACT	20.0053	0.484686	19.2356	0.478979	0.8031	0.0511
20211017-Gao5.00Pm	Basic Relative Quantification for All Samples	C4/A4	RED	NAC50	ACT	20.6357	0.66347	21.2459	0.645879	2.1305	0.3485
20211017-Gao5.00Pm	Basic Relative Quantification for All Samples	C7/A7	WHT	NAC50	ACT	19.6569	0.365248	20.3569	0.53789	2.6301	0.5065
20211017-Gao5.00Pm	Basic Relative Quantification for All Samples	C10/A10	YEL	NAC50	ACT	19.457	0.485848	20.2459	0.0452488	1.1245	0.3485
